# Supplementary material
Source: MDPI journal article supplement (https://www.mdpi.com/2073-4352/10/12/1122)

# checkCIF/PLATON report

Structure factors have been supplied for datablock(s) Compound\_6\_mo\_uco3\_4\_yel

THIS REPORT IS FOR GUIDANCE ONLY. IF USED AS PART OF A REVIEW PROCEDURE FOR PUBLICATION, IT SHOULD NOT REPLACE THE EXPERTISE OF AN EXPERIENCED CRYSTALLOGRAPHIC REFEREE.

No syntax errors found.      CIF dictionary      Interpreting this report

## Datablock: Compound\_6\_mo\_uco3\_4\_yel

---

|                 |                    |                                     |
|-----------------|--------------------|-------------------------------------|
| Bond precision: | O- N = 0.0075 A    | Wavelength=0.71073                  |
| Cell:           | a=10.9048(2)       | b=10.9944(2)      c=17.0902(3)      |
|                 | alpha=73.445(2)    | beta=89.421(1)      gamma=86.382(1) |
| Temperature:    | 100 K              |                                     |
|                 | Calculated         | Reported                            |
| Volume          | 1960.06(6)         | 1960.06(6)                          |
| Space group     | P -1               | P -1                                |
| Hall group      | -P 1               | -P 1                                |
| Moiety formula  | H8 N2 O15 U2, H2 O | H8 N2 O15 U2, H2 O                  |
| Sum formula     | H10 N2 O16 U2      | H10 N2 O16 U2                       |
| Mr              | 770.16             | 770.16                              |
| Dx,g cm-3       | 3.915              | 3.915                               |
| Z               | 6                  | 6                                   |
| Mu (mm-1)       | 24.846             | 24.846                              |
| F000            | 2016.0             | 2016.0                              |
| F000'           | 1904.05            |                                     |
| h,k,lmax        | 14,14,22           | 14,14,22                            |
| Nref            | 9009               | 9006                                |
| Tmin,Tmax       | 0.029,0.083        | 0.783,1.000                         |
| Tmin'           | 0.001              |                                     |

Correction method= # Reported T Limits: Tmin=0.783 Tmax=1.000  
AbsCorr = MULTI-SCAN

Data completeness= 1.000      Theta(max)= 27.500

R(reflections)= 0.0287( 6988)      wR2(reflections)= 0.0608( 9006)

S = 1.018      Npar= 626

---

The following ALERTS were generated. Each ALERT has the format  
**test-name\_ALERT\_alert-type\_alert-level.**  
Click on the hyperlinks for more details of the test.

---

### ● Alert level C

|                   |                                               |              |            |                     |                |        |       |
|-------------------|-----------------------------------------------|--------------|------------|---------------------|----------------|--------|-------|
| PLAT220_ALERT_2_C | NonSolvent                                    | Resd 1       | O          | Ueq(max)/Ueq(min)   | Range          | 3.3    | Ratio |
| PLAT222_ALERT_3_C | NonSolvent                                    | Resd 1       | H          | Uiso(max)/Uiso(min) | Range          | 10.0   | Ratio |
| PLAT222_ALERT_3_C | NonSolvent                                    | Resd 2       | H          | Uiso(max)/Uiso(min) | Range          | 10.0   | Ratio |
| PLAT222_ALERT_3_C | NonSolvent                                    | Resd 3       | H          | Uiso(max)/Uiso(min) | Range          | 10.0   | Ratio |
| PLAT223_ALERT_4_C | Solv./Anion                                   | Resd 5       | H          | Ueq(max)/Ueq(min)   | Range          | 10.0   | Ratio |
| PLAT245_ALERT_2_C | U(iso) H34A                                   | Smaller than | U(eq) O34  | by                  | 0.012          | Ang**2 |       |
| PLAT245_ALERT_2_C | U(iso) H34B                                   | Smaller than | U(eq) O34  | by                  | 0.012          | Ang**2 |       |
| PLAT417_ALERT_2_C | Short Inter D-H..H-D                          |              | H45B       | ..H47A              | .              | 2.14   | Ang.  |
|                   |                                               |              |            | x,l+y,z =           | 1_565          | Check  |       |
| PLAT417_ALERT_2_C | Short Inter D-H..H-D                          |              | H45B       | ..H47B              | .              | 2.11   | Ang.  |
|                   |                                               |              |            | x,l+y,z =           | 1_565          | Check  |       |
| PLAT751_ALERT_4_C | Bond Calc                                     | 0.97000, Rep | 0.97011(3) | .....               | Senseless s.u. |        |       |
|                   | O43 -H43A                                     | 1.555        | 1.555      | .....               | # 85           | Check  |       |
| PLAT751_ALERT_4_C | Bond Calc                                     | 0.97000, Rep | 0.96678(3) | .....               | Senseless s.u. |        |       |
|                   | O43 -H43B                                     | 1.555        | 1.555      | .....               | # 86           | Check  |       |
| PLAT752_ALERT_4_C | Angle Calc                                    | 141.00, Rep  | 141.47(1)  | .....               | Senseless s.u. |        |       |
|                   | U5 -O43 -H43A                                 | 1.555        | 1.555      | 1.555               | # 217          | Check  |       |
| PLAT752_ALERT_4_C | Angle Calc                                    | 114.00, Rep  | 113.53(1)  | .....               | Senseless s.u. |        |       |
|                   | U5 -O43 -H43B                                 | 1.555        | 1.555      | 1.555               | # 218          | Check  |       |
| PLAT752_ALERT_4_C | Angle Calc                                    | 104.00, Rep  | 104.31     | .....               | Senseless s.u. |        |       |
|                   | H43A -O43 -H43B                               | 1.555        | 1.555      | 1.555               | # 219          | Check  |       |
| PLAT790_ALERT_4_C | Centre of Gravity not Within Unit Cell: Resd. | #            |            |                     | 1              | Note   |       |
|                   | H8 N2 O15 U2                                  |              |            |                     |                |        |       |
| PLAT972_ALERT_2_C | Check Calcd Resid. Dens.                      | 0.96A        | From U2    |                     | -1.51          | eA-3   |       |
| PLAT975_ALERT_2_C | Check Calcd Resid. Dens.                      | 0.56A        | From O39   |                     | 1.02           | eA-3   |       |
| PLAT975_ALERT_2_C | Check Calcd Resid. Dens.                      | 0.75A        | From O9    |                     | 0.95           | eA-3   |       |
| PLAT975_ALERT_2_C | Check Calcd Resid. Dens.                      | 1.00A        | From O2    |                     | 0.94           | eA-3   |       |
| PLAT975_ALERT_2_C | Check Calcd Resid. Dens.                      | 0.57A        | From O1    |                     | 0.94           | eA-3   |       |
| PLAT976_ALERT_2_C | Check Calcd Resid. Dens.                      | 0.77A        | From O43   |                     | -1.13          | eA-3   |       |
| PLAT976_ALERT_2_C | Check Calcd Resid. Dens.                      | 0.90A        | From O22   |                     | -1.08          | eA-3   |       |
| PLAT976_ALERT_2_C | Check Calcd Resid. Dens.                      | 1.01A        | From O3    |                     | -0.97          | eA-3   |       |
| PLAT977_ALERT_2_C | Check Negative Difference Density on          | H31          |            |                     | -0.38          | eA-3   |       |
| PLAT977_ALERT_2_C | Check Negative Difference Density on          | H40A         |            |                     | -0.31          | eA-3   |       |
| PLAT977_ALERT_2_C | Check Negative Difference Density on          | H44A         |            |                     | -0.54          | eA-3   |       |
| PLAT977_ALERT_2_C | Check Negative Difference Density on          | H46A         |            |                     | -0.31          | eA-3   |       |

---

### ● Alert level G

|                   |                                                  |               |             |
|-------------------|--------------------------------------------------|---------------|-------------|
| PLAT002_ALERT_2_G | Number of Distance or Angle Restraints on AtSite | 44            | Note        |
| PLAT007_ALERT_5_G | Number of Unrefined Donor-H Atoms .....          | 4             | Report      |
| PLAT171_ALERT_4_G | The CIF-Embedded .res File Contains EADP Records | 4             | Report      |
| PLAT172_ALERT_4_G | The CIF-Embedded .res File Contains DFIX Records | 31            | Report      |
| PLAT432_ALERT_2_G | Short Inter X...Y Contact O1                     | ..N3          | 2.81 Ang.   |
|                   |                                                  | x,y,z =       | 1_555 Check |
| PLAT432_ALERT_2_G | Short Inter X...Y Contact O6                     | ..N2          | 2.67 Ang.   |
|                   |                                                  | x,y,z =       | 1_555 Check |
| PLAT432_ALERT_2_G | Short Inter X...Y Contact O9                     | ..N6          | 2.82 Ang.   |
|                   |                                                  | 2-x,3-y,2-z = | 2_787 Check |
| PLAT432_ALERT_2_G | Short Inter X...Y Contact O14                    | ..N5          | 2.84 Ang.   |
|                   |                                                  | 1-x,2-y,2-z = | 2_677 Check |
| PLAT432_ALERT_2_G | Short Inter X...Y Contact O23                    | ..N4          | 2.84 Ang.   |
|                   |                                                  | 2-x,3-y,1-z = | 2_786 Check |
| PLAT790_ALERT_4_G | Centre of Gravity not Within Unit Cell: Resd.    | #             | 2 Note      |
|                   | H8 N2 O15 U2                                     |               |             |
| PLAT790_ALERT_4_G | Centre of Gravity not Within Unit Cell: Resd.    | #             | 3 Note      |
|                   | H8 N2 O15 U2                                     |               |             |
| PLAT790_ALERT_4_G | Centre of Gravity not Within Unit Cell: Resd.    | #             | 4 Note      |
|                   | H2 O                                             |               |             |
| PLAT790_ALERT_4_G | Centre of Gravity not Within Unit Cell: Resd.    | #             | 5 Note      |
|                   | H2 O                                             |               |             |

|                   |                                                  |      |             |
|-------------------|--------------------------------------------------|------|-------------|
| PLAT790_ALERT_4_G | Centre of Gravity not Within Unit Cell: Resd. #  | 6    | Note        |
|                   | H2 O                                             |      |             |
| PLAT794_ALERT_5_G | Tentative Bond Valency for U1 (VI) .             | 5.98 | Info        |
| PLAT794_ALERT_5_G | Tentative Bond Valency for U2 (VI) .             | 6.12 | Info        |
| PLAT794_ALERT_5_G | Tentative Bond Valency for U3 (VI) .             | 6.05 | Info        |
| PLAT794_ALERT_5_G | Tentative Bond Valency for U4 (VI) .             | 6.11 | Info        |
| PLAT794_ALERT_5_G | Tentative Bond Valency for U5 (VI) .             | 6.05 | Info        |
| PLAT794_ALERT_5_G | Tentative Bond Valency for U6 (VI) .             | 6.18 | Info        |
| PLAT860_ALERT_3_G | Number of Least-Squares Restraints .....         | 31   | Note        |
| PLAT883_ALERT_1_G | No Info/Value for _atom_sites_solution_primary . |      | Please Do ! |
| PLAT910_ALERT_3_G | Missing # of FCF Reflection(s) Below Theta(Min). | 2    | Note        |
| PLAT912_ALERT_4_G | Missing # of FCF Reflections Above STh/L= 0.600  | 1    | Note        |
| PLAT941_ALERT_3_G | Average HKL Measurement Multiplicity .....       | 2.6  | Low         |

---

0 **ALERT level A** = Most likely a serious problem - resolve or explain  
0 **ALERT level B** = A potentially serious problem, consider carefully  
27 **ALERT level C** = Check. Ensure it is not caused by an omission or oversight  
25 **ALERT level G** = General information/check it is not something unexpected

1 ALERT type 1 CIF construction/syntax error, inconsistent or missing data  
23 ALERT type 2 Indicator that the structure model may be wrong or deficient  
6 ALERT type 3 Indicator that the structure quality may be low  
15 ALERT type 4 Improvement, methodology, query or suggestion  
7 ALERT type 5 Informative message, check

---

It is advisable to attempt to resolve as many as possible of the alerts in all categories. Often the minor alerts point to easily fixed oversights, errors and omissions in your CIF or refinement strategy, so attention to these fine details can be worthwhile. In order to resolve some of the more serious problems it may be necessary to carry out additional measurements or structure refinements. However, the purpose of your study may justify the reported deviations and the more serious of these should normally be commented upon in the discussion or experimental section of a paper or in the "special\_details" fields of the CIF. checkCIF was carefully designed to identify outliers and unusual parameters, but every test has its limitations and alerts that are not important in a particular case may appear. Conversely, the absence of alerts does not guarantee there are no aspects of the results needing attention. It is up to the individual to critically assess their own results and, if necessary, seek expert advice.

### Publication of your CIF in IUCr journals

A basic structural check has been run on your CIF. These basic checks will be run on all CIFs submitted for publication in IUCr journals (*Acta Crystallographica*, *Journal of Applied Crystallography*, *Journal of Synchrotron Radiation*); however, if you intend to submit to *Acta Crystallographica Section C* or *E* or *IUCrData*, you should make sure that full publication checks are run on the final version of your CIF prior to submission.

### Publication of your CIF in other journals

Please refer to the *Notes for Authors* of the relevant journal for any special instructions relating to CIF submission.

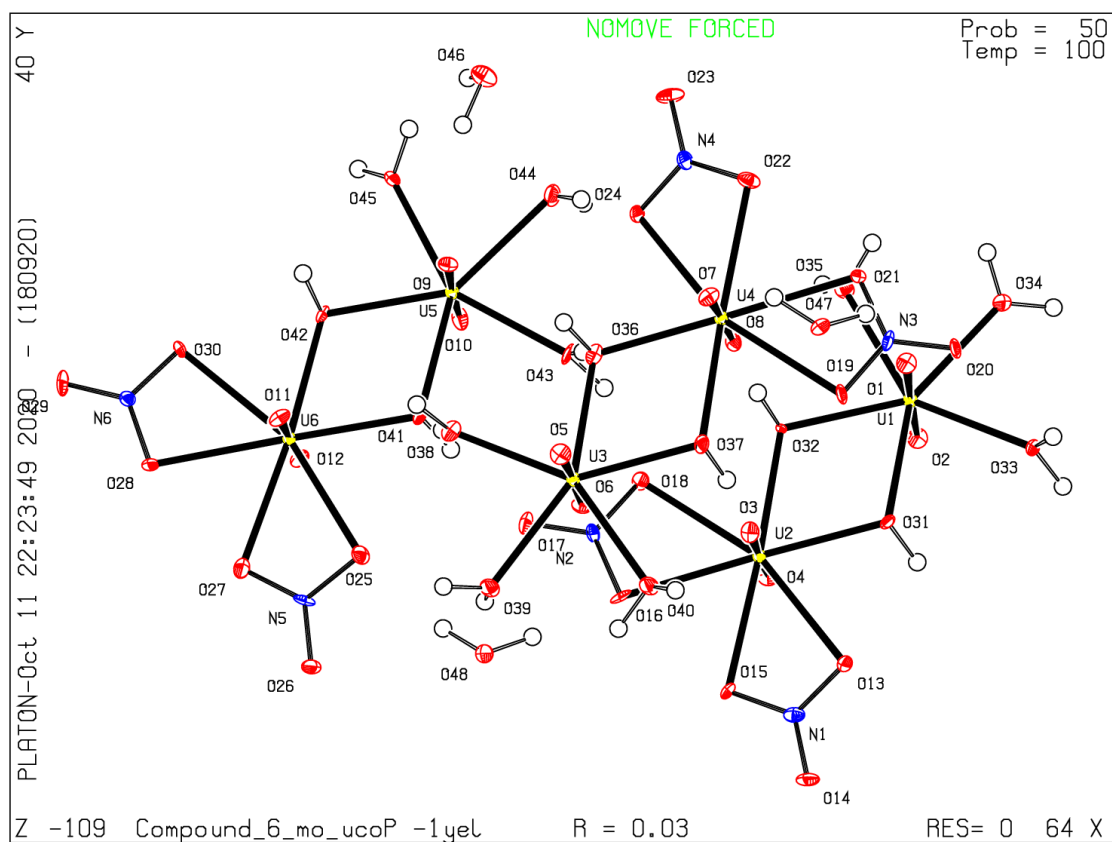

Supplement: s1 [file s1 › Compound_6_checkcif.pdf]
