# Supplementary material
Source: MDPI journal article supplement (https://www.mdpi.com/2073-4352/10/12/1122)
Supplement: s1 [file s1]

Archive with 12 entries (12 files):
- Compound_1.cif
- Compound_1_checkcif.pdf
- Compound_2.cif
- Compound_2_checkcif.pdf
- Compound_3.cif
- Compound_3_checkcif.pdf
- Compound_4.cif
- Compound_4_checkcif.pdf
- Compound_5.cif
- Compound_5_checkcif.pdf
- Compound_6.cif
- Compound_6_checkcif.pdf
