# Supplementary material
Source: MDPI journal article supplement (https://www.mdpi.com/2073-4352/10/12/1122)
Supplement: s1 [file s1 › Compound_1.cif]

data_Compound_1_mo_seo3_2t_new_sx
_audit_creation_date               2020-10-11
_audit_creation_method
;
Olex2 1.3
(compiled 2020.07.31 svn.rc2a77460 for OlexSys, GUI svn.r6145)
;
_shelx_SHELXL_version_number       '2018/3'
_audit_contact_author_address      ?
_audit_contact_author_email        ?
_audit_contact_author_name         ''
_audit_contact_author_phone        ?
_publ_contact_author_id_orcid      ?
_publ_section_references
;
Dolomanov, O.V., Bourhis, L.J., Gildea, R.J, Howard, J.A.K. & Puschmann, H.
 (2009), J. Appl. Cryst. 42, 339-341.

Sheldrick, G.M. (2015). Acta Cryst. C71, 3-8.
;
_chemical_name_common              ?
_chemical_name_systematic          ?
_chemical_formula_moiety           'Cl3 K3 N2 O8 U'
_chemical_formula_sum              'Cl3 K3 N2 O8 U'
_chemical_formula_weight           617.70
_chemical_absolute_configuration   ?
_chemical_melting_point            ?
loop_
  _atom_type_symbol
  _atom_type_description
  _atom_type_scat_dispersion_real
  _atom_type_scat_dispersion_imag
  _atom_type_scat_source
 'Cl' 'Cl' 0.1484 0.1585 'International Tables Vol C Tables 4.2.6.8 and 6.1.1.4'
 'K' 'K' 0.2009 0.2494 'International Tables Vol C Tables 4.2.6.8 and 6.1.1.4'
 'N' 'N' 0.0061 0.0033 'International Tables Vol C Tables 4.2.6.8 and 6.1.1.4'
 'O' 'O' 0.0106 0.0060 'International Tables Vol C Tables 4.2.6.8 and 6.1.1.4'
 'U' 'U' -9.6767 9.6646 'International Tables Vol C Tables 4.2.6.8 and 6.1.1.4'

_shelx_space_group_comment
;
The symmetry employed for this shelxl refinement is uniquely defined
by the following loop, which should always be used as a source of
symmetry information in preference to the above space-group names.
They are only intended as comments.
;
_space_group_crystal_system        'monoclinic'
_space_group_IT_number             4
_space_group_name_H-M_alt          'P 1 21 1'
_space_group_name_Hall             'P 2yb'
loop_
  _space_group_symop_operation_xyz
 'x, y, z'
 '-x, y+1/2, -z'

_cell_length_a                     7.81060(10)
_cell_length_b                     15.6882(2)
_cell_length_c                     10.59350(10)
_cell_angle_alpha                  90
_cell_angle_beta                   90.1470(10)
_cell_angle_gamma                  90
_cell_volume                       1298.06(3)
_cell_formula_units_Z              4
_cell_measurement_reflns_used      7453
_cell_measurement_temperature      100(2)
_cell_measurement_theta_max        31.488
_cell_measurement_theta_min        2.514
_shelx_estimated_absorpt_T_max     ?
_shelx_estimated_absorpt_T_min     ?
_exptl_absorpt_coefficient_mu      14.108
_exptl_absorpt_correction_T_max    0.438
_exptl_absorpt_correction_T_min    0.211
_exptl_absorpt_correction_type     'multi-scan'
_exptl_absorpt_process_details     'SADABS; Bruker, 2013'
_exptl_absorpt_special_details     ?
_exptl_crystal_colour              'yellow'
_exptl_crystal_density_diffrn      3.161
_exptl_crystal_density_meas        ?
_exptl_crystal_density_method      ?
_exptl_crystal_description         'prism'
_exptl_crystal_F_000               1112
_exptl_crystal_size_max            0.16
_exptl_crystal_size_mid            0.10
_exptl_crystal_size_min            0.07
_exptl_transmission_factor_max     ?
_exptl_transmission_factor_min     ?
_diffrn_reflns_av_R_equivalents    0.0186
_diffrn_reflns_av_unetI/netI       0.0213
_diffrn_reflns_Laue_measured_fraction_full  1.000
_diffrn_reflns_Laue_measured_fraction_max  1.000
_diffrn_reflns_limit_h_max         10
_diffrn_reflns_limit_h_min         -10
_diffrn_reflns_limit_k_max         20
_diffrn_reflns_limit_k_min         -20
_diffrn_reflns_limit_l_max         12
_diffrn_reflns_limit_l_min         -13
_diffrn_reflns_number              13057
_diffrn_reflns_point_group_measured_fraction_full  1.000
_diffrn_reflns_point_group_measured_fraction_max  1.000
_diffrn_reflns_theta_full          25.242
_diffrn_reflns_theta_max           27.500
_diffrn_reflns_theta_min           1.922
_diffrn_ambient_temperature        100(2)
_diffrn_detector_area_resol_mean   ?
_diffrn_measured_fraction_theta_full  1.000
_diffrn_measured_fraction_theta_max  1.000
_diffrn_measurement_device_type    'Bruker Kappa APEX-II DUO CCD'
_diffrn_measurement_method         '\f and \w scans'
_diffrn_radiation_type             MoK\a
_diffrn_radiation_wavelength       0.71073
_diffrn_source                     ?
_reflns_Friedel_coverage           0.929
_reflns_Friedel_fraction_full      1.000
_reflns_Friedel_fraction_max       1.000
_reflns_number_gt                  5802
_reflns_number_total               5961
_reflns_special_details
;
 Reflections were merged by SHELXL according to the crystal
 class for the calculation of statistics and refinement.
 
 _reflns_Friedel_fraction is defined as the number of unique
 Friedel pairs measured divided by the number that would be
 possible theoretically, ignoring centric projections and
 systematic absences. Completness statistics refer to single and
 composite reflections containing twin component 1 only.
;
_reflns_threshold_expression       'I > 2\s(I)'
_computing_cell_refinement         ?
_computing_data_collection         ?
_computing_data_reduction          ?
_computing_molecular_graphics      'Olex2 1.3 (Dolomanov et al., 2009)'
_computing_publication_material    'Olex2 1.3 (Dolomanov et al., 2009)'
_computing_structure_refinement    'SHELXL (Sheldrick, 2015)'
_computing_structure_solution      'SHELXT (Sheldrick, 2015)'
_refine_diff_density_max           0.542
_refine_diff_density_min           -0.416
_refine_diff_density_rms           0.094
_refine_ls_abs_structure_details
;
 Refined as an inversion twin.
;
_refine_ls_abs_structure_Flack     0.490(4)
_refine_ls_extinction_coef         .
_refine_ls_extinction_method       none
_refine_ls_goodness_of_fit_ref     1.031
_refine_ls_hydrogen_treatment      undef
_refine_ls_matrix_type             full
_refine_ls_number_parameters       308
_refine_ls_number_reflns           5961
_refine_ls_number_restraints       1
_refine_ls_R_factor_all            0.0160
_refine_ls_R_factor_gt             0.0151
_refine_ls_restrained_S_all        1.031
_refine_ls_shift/su_max            0.000
_refine_ls_shift/su_mean           0.000
_refine_ls_structure_factor_coef   Fsqd
_refine_ls_weighting_details      
 'w=1/[\s^2^(Fo^2^)+(0.0165P)^2^+0.5585P] where P=(Fo^2^+2Fc^2^)/3'
_refine_ls_weighting_scheme        calc
_refine_ls_wR_factor_gt            0.0333
_refine_ls_wR_factor_ref           0.0336
_refine_special_details
;
 Refined as a 2-component inversion twin.
;
_olex2_refinement_description
;
1. Twinned data refinement
 Scales: 0.510(5)
 0.490(5)
;
_atom_sites_solution_hydrogens     .
_atom_sites_solution_primary       ?
_atom_sites_solution_secondary     ?
loop_
  _atom_site_label
  _atom_site_type_symbol
  _atom_site_fract_x
  _atom_site_fract_y
  _atom_site_fract_z
  _atom_site_U_iso_or_equiv
  _atom_site_adp_type
  _atom_site_occupancy
  _atom_site_site_symmetry_order
  _atom_site_calc_flag
  _atom_site_refinement_flags_posn
  _atom_site_refinement_flags_adp
  _atom_site_refinement_flags_occupancy
  _atom_site_disorder_assembly
  _atom_site_disorder_group
 U1 U 0.06157(2) 0.33660(2) 0.81806(2) 0.00720(6) Uani 1 1 d . . . . .
 U2 U 0.45503(2) 0.66794(2) 0.68330(2) 0.00718(6) Uani 1 1 d . . . . .
 Cl1 Cl 0.38467(18) 0.37114(12) 0.74966(16) 0.0120(3) Uani 1 1 d . . . . .
 Cl2 Cl 0.23249(19) 0.24060(13) 0.98825(17) 0.0153(4) Uani 1 1 d . . . . .
 Cl3 Cl -0.20959(18) 0.27347(12) 0.94767(17) 0.0132(3) Uani 1 1 d . . . . .
 Cl4 Cl 0.72747(18) 0.74104(12) 0.56982(16) 0.0130(3) Uani 1 1 d . . . . .
 Cl5 Cl 0.28183(19) 0.76070(12) 0.50766(16) 0.0127(3) Uani 1 1 d . . . . .
 Cl6 Cl 0.12756(18) 0.62821(12) 0.73740(16) 0.0132(3) Uani 1 1 d . . . . .
 O1 O 0.0727(6) 0.4240(4) 0.9233(5) 0.0144(10) Uani 1 1 d . . . . .
 O2 O 0.0482(6) 0.2478(4) 0.7167(5) 0.0138(11) Uani 1 1 d . . . . .
 O3 O 0.0455(6) 0.4272(4) 0.6244(5) 0.0157(11) Uani 1 1 d . . . . .
 O4 O -0.1940(5) 0.4026(4) 0.7190(5) 0.0141(11) Uani 1 1 d . . . . .
 O5 O -0.1924(6) 0.4747(4) 0.5426(5) 0.0180(12) Uani 1 1 d . . . . .
 O6 O 0.4469(6) 0.7555(4) 0.7887(5) 0.0119(10) Uani 1 1 d . . . . .
 O7 O 0.4645(5) 0.5812(3) 0.5789(4) 0.0128(10) Uani 1 1 d . . . . .
 O8 O 0.7104(5) 0.6049(3) 0.7917(5) 0.0112(10) Uani 1 1 d . . . . .
 O9 O 0.4660(5) 0.5704(4) 0.8705(5) 0.0139(11) Uani 1 1 d . . . . .
 O10 O 0.7006(6) 0.5236(4) 0.9585(5) 0.0171(12) Uani 1 1 d . . . . .
 O11 O 0.3084(6) 0.0642(3) 0.6928(4) 0.0235(10) Uani 1 1 d . . . . .
 O12 O 0.0802(5) 0.0073(3) 0.7711(4) 0.0191(10) Uani 1 1 d . . . . .
 O13 O 0.3102(6) -0.0688(3) 0.7514(4) 0.0184(9) Uani 1 1 d . . . . .
 O14 O 0.3148(5) 0.5406(3) 1.1399(4) 0.0153(9) Uani 1 1 d . . . . .
 O15 O 0.2731(5) 0.4249(3) 1.2472(4) 0.0139(8) Uani 1 1 d . . . . .
 O16 O 0.2732(5) 0.5483(3) 1.3426(4) 0.0152(9) Uani 1 1 d . . . . .
 N1 N 0.6271(7) 0.5642(4) 0.8752(6) 0.0129(13) Uani 1 1 d . . . . .
 N2 N -0.1166(7) 0.4359(4) 0.6248(6) 0.0127(13) Uani 1 1 d . . . . .
 N3 N 0.2851(6) 0.5042(4) 1.2436(5) 0.0120(10) Uani 1 1 d . . . . .
 N4 N 0.2337(7) 0.0005(5) 0.7399(6) 0.0111(9) Uani 1 1 d . . . . .
 K1 K -0.46875(17) 0.18862(10) 0.74273(15) 0.0177(3) Uani 1 1 d . . . . .
 K2 K 0.48674(16) 0.39321(11) 1.04105(14) 0.0118(3) Uani 1 1 d . . . . .
 K3 K 0.03121(16) 0.58809(11) 1.00856(15) 0.0116(3) Uani 1 1 d . . . . .
 K4 K 0.00791(16) 0.11543(10) 0.54617(13) 0.0108(3) Uani 1 1 d . . . . .
 K5 K 0.46871(17) 0.42135(11) 0.47317(15) 0.0126(3) Uani 1 1 d . . . . .
 K6 K -0.01309(17) 0.32162(10) 1.23375(16) 0.0184(3) Uani 1 1 d . . . . .

loop_
  _atom_site_aniso_label
  _atom_site_aniso_U_11
  _atom_site_aniso_U_22
  _atom_site_aniso_U_33
  _atom_site_aniso_U_23
  _atom_site_aniso_U_13
  _atom_site_aniso_U_12
 U1 0.00804(9) 0.00678(12) 0.00678(13) -0.00045(10) -0.00048(7) 0.00013(8)
 U2 0.00811(9) 0.00680(12) 0.00662(13) -0.00072(10) -0.00023(7) 0.00026(9)
 Cl1 0.0101(6) 0.0149(8) 0.0110(8) 0.0013(6) 0.0014(5) 0.0004(5)
 Cl2 0.0143(7) 0.0137(9) 0.0177(9) 0.0078(7) -0.0072(6) -0.0035(6)
 Cl3 0.0104(6) 0.0140(8) 0.0153(8) 0.0021(6) 0.0028(5) -0.0001(5)
 Cl4 0.0121(6) 0.0111(8) 0.0158(8) 0.0032(6) 0.0035(5) 0.0008(5)
 Cl5 0.0137(7) 0.0100(9) 0.0142(9) 0.0027(7) -0.0046(6) -0.0014(6)
 Cl6 0.0095(6) 0.0176(9) 0.0126(8) 0.0019(7) 0.0004(5) -0.0022(6)
 O1 0.015(2) 0.015(3) 0.013(3) -0.002(2) -0.0005(17) -0.0018(18)
 O2 0.014(2) 0.015(3) 0.013(3) -0.003(2) -0.0028(18) -0.004(2)
 O3 0.011(2) 0.021(3) 0.015(3) 0.005(2) -0.0001(18) -0.0016(19)
 O4 0.011(2) 0.021(3) 0.010(3) 0.001(2) 0.0009(17) -0.0040(19)
 O5 0.020(2) 0.016(3) 0.018(3) 0.008(2) -0.011(2) -0.001(2)
 O6 0.017(2) 0.010(3) 0.009(3) -0.004(2) 0.0033(17) 0.0029(19)
 O7 0.017(2) 0.007(2) 0.014(3) -0.003(2) -0.0008(17) 0.0018(17)
 O8 0.011(2) 0.008(2) 0.014(3) 0.002(2) 0.0005(17) 0.0007(17)
 O9 0.009(2) 0.017(3) 0.016(3) 0.006(2) -0.0030(17) -0.0022(18)
 O10 0.020(2) 0.015(3) 0.015(3) 0.006(2) -0.0090(19) -0.0012(19)
 O11 0.027(3) 0.020(2) 0.024(3) 0.005(2) -0.005(2) -0.013(2)
 O12 0.012(2) 0.029(3) 0.017(2) -0.004(2) 0.0018(16) 0.0020(19)
 O13 0.023(2) 0.015(2) 0.017(2) -0.0015(18) -0.0065(17) 0.0128(18)
 O14 0.019(2) 0.017(2) 0.010(2) 0.0036(17) 0.0024(16) -0.0008(17)
 O15 0.014(2) 0.010(2) 0.018(2) 0.0016(17) -0.0012(16) -0.0011(16)
 O16 0.016(2) 0.017(2) 0.012(2) -0.0059(18) 0.0016(17) -0.0007(17)
 N1 0.018(3) 0.010(3) 0.011(3) 0.001(3) -0.002(2) -0.002(2)
 N2 0.016(3) 0.007(3) 0.016(3) -0.001(3) -0.002(2) -0.004(2)
 N3 0.011(2) 0.013(2) 0.013(2) 0.0004(19) -0.001(2) -0.001(2)
 N4 0.010(2) 0.015(2) 0.008(2) -0.0021(18) -0.0021(16) -0.0010(19)
 K1 0.0179(6) 0.0120(8) 0.0231(8) -0.0018(6) 0.0009(5) 0.0007(5)
 K2 0.0116(6) 0.0118(8) 0.0121(8) -0.0024(6) -0.0004(5) -0.0011(5)
 K3 0.0146(7) 0.0092(7) 0.0109(7) 0.0008(6) -0.0009(5) 0.0006(6)
 K4 0.0121(6) 0.0103(8) 0.0099(7) 0.0001(6) 0.0005(5) 0.0006(5)
 K5 0.0159(7) 0.0095(7) 0.0124(7) -0.0006(6) -0.0019(5) 0.0004(5)
 K6 0.0183(6) 0.0128(8) 0.0241(8) 0.0008(6) -0.0013(5) -0.0030(5)

_geom_special_details
;
 All esds (except the esd in the dihedral angle between two l.s. planes)
 are estimated using the full covariance matrix.  The cell esds are taken
 into account individually in the estimation of esds in distances, angles
 and torsion angles; correlations between esds in cell parameters are only
 used when they are defined by crystal symmetry.  An approximate (isotropic)
 treatment of cell esds is used for estimating esds involving l.s. planes.
;
loop_
  _geom_bond_atom_site_label_1
  _geom_bond_atom_site_label_2
  _geom_bond_distance
  _geom_bond_site_symmetry_2
  _geom_bond_publ_flag
 U1 Cl1 2.6826(15) . ?
 U1 Cl2 2.6998(17) . ?
 U1 Cl3 2.7143(16) . ?
 U1 O1 1.770(5) . ?
 U1 O2 1.762(5) . ?
 U1 O3 2.499(5) . ?
 U1 O4 2.480(5) . ?
 U2 Cl4 2.7022(16) . ?
 U2 Cl5 2.7197(17) . ?
 U2 Cl6 2.6956(15) . ?
 U2 O6 1.772(5) . ?
 U2 O7 1.755(5) . ?
 U2 O8 2.503(4) . ?
 U2 O9 2.506(5) . ?
 Cl1 K1 3.085(2) 1_655 ?
 Cl1 K2 3.205(2) . ?
 Cl1 K5 3.105(2) . ?
 Cl2 K1 3.592(2) 1_655 ?
 Cl2 K2 3.160(2) . ?
 Cl2 K3 3.157(2) 2_547 ?
 Cl2 K6 3.476(2) . ?
 Cl3 K1 3.250(2) . ?
 Cl3 K2 3.185(2) 1_455 ?
 Cl3 K3 3.257(2) 2_547 ?
 Cl3 K6 3.477(2) . ?
 Cl4 K4 3.111(2) 2_656 ?
 Cl4 K5 3.249(2) 2_656 ?
 Cl4 K6 3.299(2) 2_657 ?
 Cl5 K1 3.235(2) 2_556 ?
 Cl5 K4 3.261(2) 2_556 ?
 Cl5 K5 3.192(2) 2_656 ?
 Cl5 K6 3.585(2) 2_557 ?
 Cl6 K3 3.037(2) . ?
 Cl6 K4 3.189(2) 2_556 ?
 Cl6 K6 3.178(2) 2_557 ?
 O1 K3 2.747(6) . ?
 O2 K4 2.770(5) . ?
 O3 N2 1.274(7) . ?
 O4 N2 1.279(8) . ?
 O5 N2 1.216(8) . ?
 O5 K4 2.800(6) 2_556 ?
 O5 K5 2.870(5) 1_455 ?
 O6 K2 2.861(5) 2_657 ?
 O7 K5 2.747(5) . ?
 O8 N1 1.271(8) . ?
 O8 K3 3.405(5) 1_655 ?
 O9 N1 1.263(7) . ?
 O9 K2 3.319(6) . ?
 O10 N1 1.229(8) . ?
 O10 K2 2.783(6) . ?
 O10 K3 2.822(5) 1_655 ?
 O11 N4 1.261(9) . ?
 O11 K1 2.667(5) 1_655 ?
 O11 K4 2.924(5) . ?
 O11 K5 3.341(5) 2_646 ?
 O12 N4 1.249(7) . ?
 O12 K3 2.797(4) 2_547 ?
 O12 K4 2.978(5) . ?
 O12 K6 2.960(5) 2_547 ?
 O13 N4 1.246(8) . ?
 O13 K2 2.773(4) 2_647 ?
 O13 K5 2.947(5) 2_646 ?
 O13 K6 2.893(5) 2_547 ?
 O14 N3 1.260(7) . ?
 O14 K1 2.895(5) 2_557 ?
 O14 K2 2.873(4) . ?
 O14 K3 2.717(4) . ?
 O15 N3 1.248(7) . ?
 O15 K2 2.796(4) . ?
 O15 K5 2.838(4) 1_556 ?
 O15 K6 2.764(4) . ?
 O16 N3 1.260(7) . ?
 O16 K1 2.829(4) 2_557 ?
 O16 K4 2.707(4) 2_557 ?
 O16 K5 2.864(5) 1_556 ?
 N1 K2 3.391(7) . ?
 N2 K4 3.456(7) 2_556 ?
 N3 K1 3.232(6) 2_557 ?
 N3 K2 3.184(6) . ?
 N3 K3 3.441(6) . ?
 N3 K5 3.105(6) 1_556 ?
 N4 K4 3.249(7) . ?
 N4 K6 3.306(7) 2_547 ?
 K1 K2 4.518(2) 1_455 ?
 K1 K4 4.4221(19) . ?
 K3 K6 4.475(2) 2_557 ?

loop_
  _geom_angle_atom_site_label_1
  _geom_angle_atom_site_label_2
  _geom_angle_atom_site_label_3
  _geom_angle
  _geom_angle_site_symmetry_1
  _geom_angle_site_symmetry_3
  _geom_angle_publ_flag
 Cl1 U1 Cl2 80.16(5) . . ?
 Cl1 U1 Cl3 161.11(5) . . ?
 Cl2 U1 Cl3 81.01(5) . . ?
 O1 U1 Cl1 88.23(15) . . ?
 O1 U1 Cl2 89.33(17) . . ?
 O1 U1 Cl3 90.06(16) . . ?
 O1 U1 O3 94.5(2) . . ?
 O1 U1 O4 88.9(2) . . ?
 O2 U1 Cl1 92.83(15) . . ?
 O2 U1 Cl2 89.68(17) . . ?
 O2 U1 Cl3 88.55(16) . . ?
 O2 U1 O1 178.4(2) . . ?
 O2 U1 O3 86.9(2) . . ?
 O2 U1 O4 91.5(2) . . ?
 O3 U1 Cl1 73.06(11) . . ?
 O3 U1 Cl2 152.79(11) . . ?
 O3 U1 Cl3 125.83(11) . . ?
 O4 U1 Cl1 123.94(12) . . ?
 O4 U1 Cl2 155.76(12) . . ?
 O4 U1 Cl3 74.82(12) . . ?
 O4 U1 O3 51.42(15) . . ?
 Cl4 U2 Cl5 81.92(5) . . ?
 Cl6 U2 Cl4 160.29(5) . . ?
 Cl6 U2 Cl5 78.38(5) . . ?
 O6 U2 Cl4 88.90(16) . . ?
 O6 U2 Cl5 89.87(17) . . ?
 O6 U2 Cl6 90.56(15) . . ?
 O6 U2 O8 92.68(19) . . ?
 O6 U2 O9 88.6(2) . . ?
 O7 U2 Cl4 90.82(16) . . ?
 O7 U2 Cl5 90.31(16) . . ?
 O7 U2 Cl6 89.78(15) . . ?
 O7 U2 O6 179.6(2) . . ?
 O7 U2 O8 87.04(19) . . ?
 O7 U2 O9 91.4(2) . . ?
 O8 U2 Cl4 75.18(11) . . ?
 O8 U2 Cl5 156.89(11) . . ?
 O8 U2 Cl6 124.52(11) . . ?
 O8 U2 O9 50.96(14) . . ?
 O9 U2 Cl4 125.86(10) . . ?
 O9 U2 Cl5 152.13(10) . . ?
 O9 U2 Cl6 73.81(10) . . ?
 U1 Cl1 K1 99.70(6) . 1_655 ?
 U1 Cl1 K2 89.63(5) . . ?
 U1 Cl1 K5 120.49(6) . . ?
 K1 Cl1 K2 91.82(6) 1_655 . ?
 K1 Cl1 K5 97.68(6) 1_655 . ?
 K5 Cl1 K2 145.95(7) . . ?
 U1 Cl2 K1 87.94(5) . 1_655 ?
 U1 Cl2 K2 90.28(6) . . ?
 U1 Cl2 K3 96.23(5) . 2_547 ?
 U1 Cl2 K6 91.30(6) . . ?
 K2 Cl2 K1 83.75(5) . 1_655 ?
 K2 Cl2 K6 86.46(6) . . ?
 K3 Cl2 K1 105.11(6) 2_547 1_655 ?
 K3 Cl2 K2 169.14(8) 2_547 . ?
 K3 Cl2 K6 84.71(5) 2_547 . ?
 K6 Cl2 K1 170.17(7) . 1_655 ?
 U1 Cl3 K1 107.28(6) . . ?
 U1 Cl3 K2 121.64(7) . 1_455 ?
 U1 Cl3 K3 93.66(5) . 2_547 ?
 U1 Cl3 K6 91.05(5) . . ?
 K1 Cl3 K3 89.70(6) . 2_547 ?
 K1 Cl3 K6 160.77(7) . . ?
 K2 Cl3 K1 89.20(5) 1_455 . ?
 K2 Cl3 K3 143.22(7) 1_455 2_547 ?
 K2 Cl3 K6 85.90(5) 1_455 . ?
 K3 Cl3 K6 83.24(5) 2_547 . ?
 U2 Cl4 K4 115.57(7) . 2_656 ?
 U2 Cl4 K5 93.45(5) . 2_656 ?
 U2 Cl4 K6 114.46(6) . 2_657 ?
 K4 Cl4 K5 144.08(7) 2_656 2_656 ?
 K4 Cl4 K6 92.46(5) 2_656 2_657 ?
 K5 Cl4 K6 94.17(6) 2_656 2_657 ?
 U2 Cl5 K1 98.58(6) . 2_556 ?
 U2 Cl5 K4 95.13(6) . 2_556 ?
 U2 Cl5 K5 94.39(5) . 2_656 ?
 U2 Cl5 K6 84.90(5) . 2_557 ?
 K1 Cl5 K4 85.80(6) 2_556 2_556 ?
 K1 Cl5 K6 170.41(6) 2_556 2_557 ?
 K4 Cl5 K6 84.98(5) 2_556 2_557 ?
 K5 Cl5 K1 92.95(6) 2_656 2_556 ?
 K5 Cl5 K4 170.48(7) 2_656 2_556 ?
 K5 Cl5 K6 95.70(6) 2_656 2_557 ?
 U2 Cl6 K3 119.11(6) . . ?
 U2 Cl6 K4 97.30(5) . 2_556 ?
 U2 Cl6 K6 93.84(6) . 2_557 ?
 K3 Cl6 K4 142.70(6) . 2_556 ?
 K3 Cl6 K6 92.09(6) . 2_557 ?
 K6 Cl6 K4 93.32(6) 2_557 2_556 ?
 U1 O1 K3 158.1(3) . . ?
 U1 O2 K4 175.4(3) . . ?
 N2 O3 U1 96.1(4) . . ?
 N2 O4 U1 96.8(4) . . ?
 N2 O5 K4 112.7(4) . 2_556 ?
 N2 O5 K5 119.0(4) . 1_455 ?
 K4 O5 K5 128.24(18) 2_556 1_455 ?
 U2 O6 K2 167.5(2) . 2_657 ?
 U2 O7 K5 164.9(3) . . ?
 U2 O8 K3 157.6(2) . 1_655 ?
 N1 O8 U2 96.3(3) . . ?
 N1 O8 K3 82.5(3) . 1_655 ?
 U2 O9 K2 160.7(2) . . ?
 N1 O9 U2 96.3(4) . . ?
 N1 O9 K2 82.4(4) . . ?
 N1 O10 K2 109.1(4) . . ?
 N1 O10 K3 112.0(4) . 1_655 ?
 K2 O10 K3 138.93(19) . 1_655 ?
 N4 O11 K1 143.5(4) . 1_655 ?
 N4 O11 K4 93.2(3) . . ?
 N4 O11 K5 85.3(4) . 2_646 ?
 K1 O11 K4 115.28(17) 1_655 . ?
 K1 O11 K5 104.75(15) 1_655 2_646 ?
 K4 O11 K5 108.87(14) . 2_646 ?
 N4 O12 K3 124.0(4) . 2_547 ?
 N4 O12 K4 91.0(4) . . ?
 N4 O12 K6 94.7(4) . 2_547 ?
 K3 O12 K4 110.53(16) 2_547 . ?
 K3 O12 K6 113.89(16) 2_547 2_547 ?
 K6 O12 K4 120.91(15) 2_547 . ?
 N4 O13 K2 122.5(4) . 2_647 ?
 N4 O13 K5 104.4(4) . 2_646 ?
 N4 O13 K6 98.0(4) . 2_547 ?
 K2 O13 K5 107.07(14) 2_647 2_646 ?
 K2 O13 K6 106.64(16) 2_647 2_547 ?
 K6 O13 K5 118.99(16) 2_547 2_646 ?
 N3 O14 K1 93.8(4) . 2_557 ?
 N3 O14 K2 92.3(4) . . ?
 N3 O14 K3 114.8(3) . . ?
 K2 O14 K1 127.45(15) . 2_557 ?
 K3 O14 K1 109.71(15) . 2_557 ?
 K3 O14 K2 114.54(15) . . ?
 N3 O15 K2 96.3(3) . . ?
 N3 O15 K5 90.3(3) . 1_556 ?
 N3 O15 K6 130.1(3) . . ?
 K2 O15 K5 109.52(14) . 1_556 ?
 K6 O15 K2 109.85(15) . . ?
 K6 O15 K5 117.73(15) . 1_556 ?
 N3 O16 K1 96.9(3) . 2_557 ?
 N3 O16 K4 129.6(3) . 2_557 ?
 N3 O16 K5 88.8(3) . 1_556 ?
 K1 O16 K5 114.06(14) 2_557 1_556 ?
 K4 O16 K1 106.00(15) 2_557 2_557 ?
 K4 O16 K5 119.49(15) 2_557 1_556 ?
 U2 N1 K2 130.61(18) . . ?
 O8 N1 U2 58.2(3) . . ?
 O8 N1 K2 157.6(5) . . ?
 O9 N1 U2 58.3(3) . . ?
 O9 N1 O8 116.5(6) . . ?
 O9 N1 K2 76.0(4) . . ?
 O10 N1 U2 177.5(5) . . ?
 O10 N1 O8 121.4(5) . . ?
 O10 N1 O9 122.1(6) . . ?
 O10 N1 K2 50.9(3) . . ?
 U1 N2 K4 133.19(18) . 2_556 ?
 O3 N2 U1 58.2(3) . . ?
 O3 N2 O4 115.6(6) . . ?
 O3 N2 K4 80.8(4) . 2_556 ?
 O4 N2 U1 57.4(3) . . ?
 O4 N2 K4 149.1(5) . 2_556 ?
 O5 N2 U1 177.9(5) . . ?
 O5 N2 O3 122.2(6) . . ?
 O5 N2 O4 122.2(6) . . ?
 O5 N2 K4 48.4(3) . 2_556 ?
 O14 N3 K1 63.3(3) . 2_557 ?
 O14 N3 K2 64.4(3) . . ?
 O14 N3 K3 45.8(3) . . ?
 O14 N3 K5 141.9(3) . 1_556 ?
 O15 N3 O14 119.4(6) . . ?
 O15 N3 O16 121.1(5) . . ?
 O15 N3 K1 157.5(4) . 2_557 ?
 O15 N3 K2 60.8(3) . . ?
 O15 N3 K3 111.1(4) . . ?
 O15 N3 K5 66.0(3) . 1_556 ?
 O16 N3 O14 119.4(6) . . ?
 O16 N3 K1 60.3(3) . 2_557 ?
 O16 N3 K2 154.0(3) . . ?
 O16 N3 K3 110.4(4) . . ?
 O16 N3 K5 67.2(3) . 1_556 ?
 K1 N3 K3 86.84(15) 2_557 . ?
 K2 N3 K1 107.42(14) . 2_557 ?
 K2 N3 K3 90.37(15) . . ?
 K5 N3 K1 97.80(15) 1_556 2_557 ?
 K5 N3 K2 94.05(16) 1_556 . ?
 K5 N3 K3 172.32(16) 1_556 . ?
 O11 N4 K4 64.0(3) . . ?
 O11 N4 K6 161.5(4) . 2_547 ?
 O12 N4 O11 118.9(7) . . ?
 O12 N4 K4 66.4(3) . . ?
 O12 N4 K6 63.2(4) . 2_547 ?
 O13 N4 O11 120.6(5) . . ?
 O13 N4 O12 120.5(7) . . ?
 O13 N4 K4 143.6(4) . . ?
 O13 N4 K6 60.0(4) . 2_547 ?
 K4 N4 K6 104.01(14) . 2_547 ?
 U1 K1 U2 103.87(3) 1_455 2_546 ?
 U1 K1 K2 55.58(2) 1_455 1_455 ?
 U1 K1 K4 157.28(5) 1_455 . ?
 Cl1 K1 U1 36.79(3) 1_455 1_455 ?
 Cl1 K1 U2 95.74(5) 1_455 2_546 ?
 Cl1 K1 Cl2 61.98(5) 1_455 1_455 ?
 Cl1 K1 Cl3 80.47(6) 1_455 . ?
 Cl1 K1 Cl5 82.15(6) 1_455 2_546 ?
 Cl1 K1 N3 173.97(12) 1_455 2_547 ?
 Cl1 K1 K2 45.15(4) 1_455 1_455 ?
 Cl1 K1 K4 124.42(5) 1_455 . ?
 Cl2 K1 U1 37.66(3) 1_455 1_455 ?
 Cl2 K1 U2 139.05(5) 1_455 2_546 ?
 Cl2 K1 K2 44.04(4) 1_455 1_455 ?
 Cl2 K1 K4 161.63(5) 1_455 . ?
 Cl3 K1 U1 100.38(5) . 1_455 ?
 Cl3 K1 U2 132.78(5) . 2_546 ?
 Cl3 K1 Cl2 80.09(5) . 1_455 ?
 Cl3 K1 K2 44.82(4) . 1_455 ?
 Cl3 K1 K4 84.10(4) . . ?
 Cl5 K1 U1 109.95(5) 2_546 1_455 ?
 Cl5 K1 U2 36.45(3) 2_546 2_546 ?
 Cl5 K1 Cl2 144.06(7) 2_546 1_455 ?
 Cl5 K1 Cl3 97.06(5) 2_546 . ?
 Cl5 K1 K2 111.15(5) 2_546 1_455 ?
 Cl5 K1 K4 47.35(4) 2_546 . ?
 O11 K1 U1 83.02(11) 1_455 1_455 ?
 O11 K1 U2 76.52(10) 1_455 2_546 ?
 O11 K1 Cl1 116.22(12) 1_455 1_455 ?
 O11 K1 Cl2 83.39(11) 1_455 1_455 ?
 O11 K1 Cl3 146.86(12) 1_455 . ?
 O11 K1 Cl5 112.88(11) 1_455 2_546 ?
 O11 K1 O14 76.61(14) 1_455 2_547 ?
 O11 K1 O16 73.74(14) 1_455 2_547 ?
 O11 K1 N3 69.11(15) 1_455 2_547 ?
 O11 K1 K2 127.38(12) 1_455 1_455 ?
 O11 K1 K4 105.45(12) 1_455 . ?
 O14 K1 U1 133.53(9) 2_547 1_455 ?
 O14 K1 U2 111.09(9) 2_547 2_546 ?
 O14 K1 Cl1 152.67(10) 2_547 1_455 ?
 O14 K1 Cl2 98.11(9) 2_547 1_455 ?
 O14 K1 Cl3 77.54(10) 2_547 . ?
 O14 K1 Cl5 116.41(10) 2_547 2_546 ?
 O14 K1 N3 22.90(13) 2_547 2_547 ?
 O14 K1 K2 107.58(9) 2_547 1_455 ?
 O14 K1 K4 69.18(9) 2_547 . ?
 O16 K1 U1 156.40(10) 2_547 1_455 ?
 O16 K1 U2 67.13(9) 2_547 2_546 ?
 O16 K1 Cl1 158.53(10) 2_547 1_455 ?
 O16 K1 Cl2 139.48(10) 2_547 1_455 ?
 O16 K1 Cl3 101.32(10) 2_547 . ?
 O16 K1 Cl5 76.40(9) 2_547 2_546 ?
 O16 K1 O14 44.67(11) 2_547 2_547 ?
 O16 K1 N3 22.76(12) 2_547 2_547 ?
 O16 K1 K2 144.96(10) 2_547 1_455 ?
 O16 K1 K4 36.05(9) 2_547 . ?
 N3 K1 U1 146.23(10) 2_547 1_455 ?
 N3 K1 U2 88.21(11) 2_547 2_546 ?
 N3 K1 Cl2 117.38(11) 2_547 1_455 ?
 N3 K1 Cl3 93.51(11) 2_547 . ?
 N3 K1 Cl5 98.53(11) 2_547 2_546 ?
 N3 K1 K2 129.75(11) 2_547 1_455 ?
 N3 K1 K4 54.16(9) 2_547 . ?
 K2 K1 U2 138.62(4) 1_455 2_546 ?
 K4 K1 U2 59.32(3) . 2_546 ?
 K4 K1 K2 125.46(4) . 1_455 ?
 Cl1 K2 U1 40.08(3) . . ?
 Cl1 K2 O9 63.54(10) . . ?
 Cl1 K2 N1 70.52(11) . . ?
 Cl2 K2 U1 40.39(3) . . ?
 Cl2 K2 Cl1 65.98(5) . . ?
 Cl2 K2 Cl3 88.07(6) . 1_655 ?
 Cl2 K2 O9 120.56(10) . . ?
 Cl2 K2 N1 135.38(11) . . ?
 Cl2 K2 N3 102.82(11) . . ?
 Cl3 K2 U1 106.93(5) 1_655 . ?
 Cl3 K2 Cl1 79.67(5) 1_655 . ?
 Cl3 K2 O9 111.11(10) 1_655 . ?
 Cl3 K2 N1 93.65(11) 1_655 . ?
 O6 K2 U1 109.84(10) 2_647 . ?
 O6 K2 Cl1 124.74(13) 2_647 . ?
 O6 K2 Cl2 69.64(11) 2_647 . ?
 O6 K2 Cl3 67.45(11) 2_647 1_655 ?
 O6 K2 O9 169.80(14) 2_647 . ?
 O6 K2 O14 117.53(14) 2_647 . ?
 O6 K2 N1 149.98(14) 2_647 . ?
 O6 K2 N3 94.43(16) 2_647 . ?
 O9 K2 U1 80.33(9) . . ?
 O9 K2 N1 21.67(12) . . ?
 O10 K2 U1 117.17(11) . . ?
 O10 K2 Cl1 85.68(11) . . ?
 O10 K2 Cl2 151.48(12) . . ?
 O10 K2 Cl3 83.56(12) . 1_655 ?
 O10 K2 O6 130.18(14) . 2_647 ?
 O10 K2 O9 40.71(12) . . ?
 O10 K2 O14 78.74(15) . . ?
 O10 K2 O15 118.32(15) . . ?
 O10 K2 N1 20.04(13) . . ?
 O10 K2 N3 96.22(16) . . ?
 O13 K2 U1 161.62(11) 2_657 . ?
 O13 K2 Cl1 158.03(11) 2_657 . ?
 O13 K2 Cl2 131.40(11) 2_657 . ?
 O13 K2 Cl3 87.03(11) 2_657 1_655 ?
 O13 K2 O6 63.90(14) 2_657 2_647 ?
 O13 K2 O9 106.18(14) 2_657 . ?
 O13 K2 O10 75.44(14) 2_657 . ?
 O13 K2 O14 78.76(14) 2_657 . ?
 O13 K2 O15 71.57(13) 2_657 . ?
 O13 K2 N1 93.19(14) 2_657 . ?
 O13 K2 N3 68.34(14) 2_657 . ?
 O14 K2 U1 90.31(9) . . ?
 O14 K2 Cl1 108.82(10) . . ?
 O14 K2 Cl2 112.34(10) . . ?
 O14 K2 Cl3 159.57(10) . 1_655 ?
 O14 K2 O9 60.15(12) . . ?
 O14 K2 N1 72.79(14) . . ?
 O14 K2 N3 23.30(14) . . ?
 O15 K2 U1 90.24(9) . . ?
 O15 K2 Cl1 128.59(10) . . ?
 O15 K2 Cl2 84.09(10) . . ?
 O15 K2 Cl3 142.55(11) . 1_655 ?
 O15 K2 O6 75.51(13) . 2_647 ?
 O15 K2 O9 104.34(13) . . ?
 O15 K2 O14 44.89(12) . . ?
 O15 K2 N1 117.27(15) . . ?
 O15 K2 N3 22.92(13) . . ?
 N1 K2 U1 97.66(10) . . ?
 N3 K2 U1 95.96(10) . . ?
 N3 K2 Cl1 125.88(11) . . ?
 N3 K2 Cl3 154.43(11) . 1_655 ?
 N3 K2 O9 83.42(15) . . ?
 N3 K2 N1 94.46(16) . . ?
 U1 K3 U1 173.26(3) 2_557 . ?
 U1 K3 K6 60.38(3) 2_557 2_557 ?
 U1 K3 K6 117.94(4) . 2_557 ?
 Cl2 K3 U1 135.57(5) 2_557 . ?
 Cl2 K3 U1 37.88(4) 2_557 2_557 ?
 Cl2 K3 Cl3 66.46(5) 2_557 2_557 ?
 Cl2 K3 O8 57.96(9) 2_557 1_455 ?
 Cl2 K3 N3 131.06(12) 2_557 . ?
 Cl2 K3 K6 50.66(5) 2_557 2_557 ?
 Cl3 K3 U1 38.29(3) 2_557 2_557 ?
 Cl3 K3 U1 146.62(5) 2_557 . ?
 Cl3 K3 O8 109.90(10) 2_557 1_455 ?
 Cl3 K3 N3 89.60(11) 2_557 . ?
 Cl3 K3 K6 50.48(4) 2_557 2_557 ?
 Cl6 K3 U1 74.96(5) . . ?
 Cl6 K3 U1 104.73(5) . 2_557 ?
 Cl6 K3 Cl2 90.93(6) . 2_557 ?
 Cl6 K3 Cl3 80.95(6) . 2_557 ?
 Cl6 K3 O8 61.94(9) . 1_455 ?
 Cl6 K3 N3 128.32(9) . . ?
 Cl6 K3 K6 45.21(5) . 2_557 ?
 O1 K3 U1 173.54(12) . 2_557 ?
 O1 K3 U1 8.56(10) . . ?
 O1 K3 Cl2 142.28(11) . 2_557 ?
 O1 K3 Cl3 146.36(11) . 2_557 ?
 O1 K3 Cl6 81.58(12) . . ?
 O1 K3 O8 86.45(13) . 1_455 ?
 O1 K3 O10 73.20(15) . 1_455 ?
 O1 K3 O12 83.50(15) . 2_557 ?
 O1 K3 N3 79.13(15) . . ?
 O1 K3 K6 125.59(12) . 2_557 ?
 O8 K3 U1 78.60(9) 1_455 . ?
 O8 K3 U1 95.26(9) 1_455 2_557 ?
 O8 K3 N3 159.98(14) 1_455 . ?
 O8 K3 K6 61.80(9) 1_455 2_557 ?
 O10 K3 U1 104.25(12) 1_455 2_557 ?
 O10 K3 U1 69.25(12) 1_455 . ?
 O10 K3 Cl2 71.16(12) 1_455 2_557 ?
 O10 K3 Cl3 137.53(13) 1_455 2_557 ?
 O10 K3 Cl6 97.20(12) 1_455 . ?
 O10 K3 O8 39.62(13) 1_455 1_455 ?
 O10 K3 N3 121.61(15) 1_455 . ?
 O10 K3 K6 99.10(12) 1_455 2_557 ?
 O12 K3 U1 90.08(11) 2_557 2_557 ?
 O12 K3 U1 89.64(11) 2_557 . ?
 O12 K3 Cl2 97.49(11) 2_557 2_557 ?
 O12 K3 Cl3 114.82(11) 2_557 2_557 ?
 O12 K3 Cl6 164.06(12) 2_557 . ?
 O12 K3 O8 111.61(12) 2_557 1_455 ?
 O12 K3 O10 73.02(14) 2_557 1_455 ?
 O12 K3 N3 53.31(12) 2_557 . ?
 O12 K3 K6 147.17(11) 2_557 2_557 ?
 O14 K3 U1 99.51(10) . 2_557 ?
 O14 K3 U1 86.83(10) . . ?
 O14 K3 Cl2 137.17(11) . 2_557 ?
 O14 K3 Cl3 79.87(10) . 2_557 ?
 O14 K3 Cl6 109.73(10) . . ?
 O14 K3 O1 79.33(14) . . ?
 O14 K3 O8 164.64(13) . 1_455 ?
 O14 K3 O10 137.92(15) . 1_455 ?
 O14 K3 O12 72.73(13) . 2_557 ?
 O14 K3 N3 19.43(12) . . ?
 O14 K3 K6 122.87(10) . 2_557 ?
 N3 K3 U1 97.64(11) . 2_557 ?
 N3 K3 U1 87.58(11) . . ?
 N3 K3 K6 138.20(10) . 2_557 ?
 Cl4 K4 U2 101.99(5) 2_646 2_546 ?
 Cl4 K4 Cl5 87.12(6) 2_646 2_546 ?
 Cl4 K4 Cl6 78.89(5) 2_646 2_546 ?
 Cl4 K4 N2 98.33(11) 2_646 2_546 ?
 Cl4 K4 N4 103.93(12) 2_646 . ?
 Cl4 K4 K1 125.62(6) 2_646 . ?
 Cl5 K4 U2 37.71(3) 2_546 2_546 ?
 Cl5 K4 N2 130.48(11) 2_546 2_546 ?
 Cl5 K4 K1 46.85(4) 2_546 . ?
 Cl6 K4 U2 37.13(3) 2_546 2_546 ?
 Cl6 K4 Cl5 64.08(5) 2_546 2_546 ?
 Cl6 K4 N2 68.83(11) 2_546 2_546 ?
 Cl6 K4 N4 143.94(14) 2_546 . ?
 Cl6 K4 K1 98.60(4) 2_546 . ?
 O2 K4 U2 108.04(11) . 2_546 ?
 O2 K4 Cl4 73.03(12) . 2_646 ?
 O2 K4 Cl5 70.59(11) . 2_546 ?
 O2 K4 Cl6 127.16(13) . 2_546 ?
 O2 K4 O5 138.80(14) . 2_546 ?
 O2 K4 O11 76.69(15) . . ?
 O2 K4 O12 83.37(15) . . ?
 O2 K4 N2 157.71(14) . 2_546 ?
 O2 K4 N4 86.76(17) . . ?
 O2 K4 K1 65.96(10) . . ?
 O5 K4 U2 112.48(10) 2_546 2_546 ?
 O5 K4 Cl4 91.35(12) 2_546 2_646 ?
 O5 K4 Cl5 148.18(11) 2_546 2_546 ?
 O5 K4 Cl6 84.43(11) 2_546 2_546 ?
 O5 K4 O11 63.18(14) 2_546 . ?
 O5 K4 O12 73.92(14) 2_546 . ?
 O5 K4 N2 18.94(13) 2_546 2_546 ?
 O5 K4 N4 59.72(16) 2_546 . ?
 O5 K4 K1 142.90(12) 2_546 . ?
 O11 K4 U2 174.76(11) . 2_546 ?
 O11 K4 Cl4 81.41(9) . 2_646 ?
 O11 K4 Cl5 147.21(11) . 2_546 ?
 O11 K4 Cl6 141.43(11) . 2_546 ?
 O11 K4 O12 42.95(12) . . ?
 O11 K4 N2 81.76(14) . 2_546 ?
 O11 K4 N4 22.80(14) . . ?
 O11 K4 K1 119.79(10) . . ?
 O12 K4 U2 134.26(9) . 2_546 ?
 O12 K4 Cl4 123.52(10) . 2_646 ?
 O12 K4 Cl5 131.93(9) . 2_546 ?
 O12 K4 Cl6 148.36(11) . 2_546 ?
 O12 K4 N2 84.76(14) . 2_546 ?
 O12 K4 N4 22.61(13) . . ?
 O12 K4 K1 85.95(9) . . ?
 O16 K4 U2 69.48(9) 2_547 2_546 ?
 O16 K4 Cl4 163.44(11) 2_547 2_646 ?
 O16 K4 Cl5 77.57(10) 2_547 2_546 ?
 O16 K4 Cl6 99.61(10) 2_547 2_546 ?
 O16 K4 O2 95.66(14) 2_547 . ?
 O16 K4 O5 104.97(15) 2_547 2_546 ?
 O16 K4 O11 108.22(13) 2_547 . ?
 O16 K4 O12 65.32(12) 2_547 . ?
 O16 K4 N2 96.42(14) 2_547 2_546 ?
 O16 K4 N4 87.07(15) 2_547 . ?
 O16 K4 K1 37.95(9) 2_547 . ?
 N2 K4 U2 93.74(10) 2_546 2_546 ?
 N2 K4 K1 131.81(10) 2_546 . ?
 N4 K4 U2 153.01(12) . 2_546 ?
 N4 K4 Cl5 150.89(13) . 2_546 ?
 N4 K4 N2 75.24(16) . 2_546 ?
 N4 K4 K1 107.64(12) . . ?
 K1 K4 U2 61.51(3) . 2_546 ?
 U2 K5 U2 170.27(4) 2_646 . ?
 Cl1 K5 U2 75.17(5) . . ?
 Cl1 K5 U2 99.04(5) . 2_646 ?
 Cl1 K5 Cl4 79.08(6) . 2_646 ?
 Cl1 K5 Cl5 82.54(6) . 2_646 ?
 Cl1 K5 O11 141.11(10) . 2_656 ?
 Cl1 K5 N3 138.30(10) . 1_554 ?
 Cl4 K5 U2 144.34(5) 2_646 . ?
 Cl4 K5 U2 38.33(3) 2_646 2_646 ?
 Cl4 K5 O11 139.17(10) 2_646 2_656 ?
 Cl5 K5 U2 38.58(3) 2_646 2_646 ?
 Cl5 K5 U2 131.90(5) 2_646 . ?
 Cl5 K5 Cl4 66.98(5) 2_646 2_646 ?
 Cl5 K5 O11 104.15(9) 2_646 2_656 ?
 O5 K5 U2 103.74(12) 1_655 2_646 ?
 O5 K5 U2 69.05(12) 1_655 . ?
 O5 K5 Cl1 91.67(12) 1_655 . ?
 O5 K5 Cl4 136.42(13) 1_655 2_646 ?
 O5 K5 Cl5 69.62(12) 1_655 2_646 ?
 O5 K5 O11 57.16(13) 1_655 2_656 ?
 O5 K5 O13 69.49(14) 1_655 2_656 ?
 O5 K5 N3 120.16(15) 1_655 1_554 ?
 O7 K5 U2 172.68(10) . 2_646 ?
 O7 K5 U2 5.89(10) . . ?
 O7 K5 Cl1 81.03(12) . . ?
 O7 K5 Cl4 147.77(12) . 2_646 ?
 O7 K5 Cl5 134.67(11) . 2_646 ?
 O7 K5 O5 68.96(15) . 1_655 ?
 O7 K5 O11 66.98(13) . 2_656 ?
 O7 K5 O13 106.79(14) . 2_656 ?
 O7 K5 O15 108.59(13) . 1_554 ?
 O7 K5 O16 63.58(13) . 1_554 ?
 O7 K5 N3 86.05(16) . 1_554 ?
 O11 K5 U2 72.19(8) 2_656 . ?
 O11 K5 U2 109.92(9) 2_656 2_646 ?
 O13 K5 U2 111.82(10) 2_656 . ?
 O13 K5 U2 70.08(9) 2_656 2_646 ?
 O13 K5 Cl1 154.22(10) 2_656 . ?
 O13 K5 Cl4 102.11(10) 2_656 2_646 ?
 O13 K5 Cl5 74.57(10) 2_656 2_646 ?
 O13 K5 O11 39.90(11) 2_656 2_656 ?
 O13 K5 N3 67.45(13) 2_656 1_554 ?
 O15 K5 U2 76.74(9) 1_554 2_646 ?
 O15 K5 U2 112.95(9) 1_554 . ?
 O15 K5 Cl1 133.34(10) 1_554 . ?
 O15 K5 Cl4 69.28(9) 1_554 2_646 ?
 O15 K5 Cl5 113.37(10) 1_554 2_646 ?
 O15 K5 O5 134.81(14) 1_554 1_655 ?
 O15 K5 O11 79.79(12) 1_554 2_656 ?
 O15 K5 O13 68.49(12) 1_554 2_656 ?
 O15 K5 O16 45.03(12) 1_554 1_554 ?
 O15 K5 N3 23.69(14) 1_554 1_554 ?
 O16 K5 U2 121.67(9) 1_554 2_646 ?
 O16 K5 U2 67.96(9) 1_554 . ?
 O16 K5 Cl1 121.22(10) 1_554 . ?
 O16 K5 Cl4 106.69(10) 1_554 2_646 ?
 O16 K5 Cl5 154.77(10) 1_554 2_646 ?
 O16 K5 O5 114.27(15) 1_554 1_655 ?
 O16 K5 O11 63.72(11) 1_554 2_656 ?
 O16 K5 O13 83.49(13) 1_554 2_656 ?
 O16 K5 N3 23.93(14) 1_554 1_554 ?
 N3 K5 U2 98.49(12) 1_554 2_646 ?
 N3 K5 U2 90.92(12) 1_554 . ?
 N3 K5 Cl4 92.17(12) 1_554 2_646 ?
 N3 K5 Cl5 131.38(13) 1_554 2_646 ?
 N3 K5 O11 63.09(12) 1_554 2_656 ?
 U1 K6 K3 58.65(3) . 2_547 ?
 U2 K6 U1 109.81(3) 2_547 . ?
 U2 K6 K3 68.55(3) 2_547 2_547 ?
 Cl2 K6 U1 37.34(3) . . ?
 Cl2 K6 U2 113.10(5) . 2_547 ?
 Cl2 K6 Cl3 60.77(5) . . ?
 Cl2 K6 Cl5 143.08(7) . 2_547 ?
 Cl2 K6 K3 44.62(4) . 2_547 ?
 Cl3 K6 U1 37.58(3) . . ?
 Cl3 K6 U2 72.76(4) . 2_547 ?
 Cl3 K6 Cl5 110.49(5) . 2_547 ?
 Cl3 K6 K3 46.28(4) . 2_547 ?
 Cl4 K6 U1 123.67(5) 2_647 . ?
 Cl4 K6 U2 101.42(5) 2_647 2_547 ?
 Cl4 K6 Cl2 87.61(5) 2_647 . ?
 Cl4 K6 Cl3 139.73(7) 2_647 . ?
 Cl4 K6 Cl5 79.17(5) 2_647 2_547 ?
 Cl4 K6 N4 128.61(12) 2_647 2_557 ?
 Cl4 K6 K3 93.93(5) 2_647 2_547 ?
 Cl5 K6 U1 148.07(5) 2_547 . ?
 Cl5 K6 U2 39.02(3) 2_547 2_547 ?
 Cl5 K6 K3 101.67(5) 2_547 2_547 ?
 Cl6 K6 U1 100.56(5) 2_547 . ?
 Cl6 K6 U2 38.68(3) 2_547 2_547 ?
 Cl6 K6 Cl2 83.04(6) 2_547 . ?
 Cl6 K6 Cl3 75.68(5) 2_547 . ?
 Cl6 K6 Cl4 76.32(6) 2_547 2_647 ?
 Cl6 K6 Cl5 60.43(5) 2_547 2_547 ?
 Cl6 K6 N4 130.96(12) 2_547 2_557 ?
 Cl6 K6 K3 42.70(4) 2_547 2_547 ?
 O12 K6 U1 87.40(9) 2_557 . ?
 O12 K6 U2 114.38(9) 2_557 2_547 ?
 O12 K6 Cl2 116.42(10) 2_557 . ?
 O12 K6 Cl3 96.95(10) 2_557 . ?
 O12 K6 Cl4 120.49(10) 2_557 2_647 ?
 O12 K6 Cl5 99.88(9) 2_557 2_547 ?
 O12 K6 Cl6 153.04(10) 2_557 2_547 ?
 O12 K6 N4 22.13(13) 2_557 2_557 ?
 O12 K6 K3 142.22(10) 2_557 2_547 ?
 O13 K6 U1 97.46(9) 2_557 . ?
 O13 K6 U2 71.21(9) 2_557 2_547 ?
 O13 K6 Cl2 134.62(11) 2_557 . ?
 O13 K6 Cl3 79.88(9) 2_557 . ?
 O13 K6 Cl4 137.28(11) 2_557 2_647 ?
 O13 K6 Cl5 69.24(9) 2_557 2_547 ?
 O13 K6 Cl6 109.65(10) 2_557 2_547 ?
 O13 K6 O12 43.45(12) 2_557 2_557 ?
 O13 K6 N4 21.92(13) 2_557 2_557 ?
 O13 K6 K3 119.58(9) 2_557 2_547 ?
 O15 K6 U1 84.94(9) . . ?
 O15 K6 U2 165.24(10) . 2_547 ?
 O15 K6 Cl2 78.77(9) . . ?
 O15 K6 Cl3 121.82(10) . . ?
 O15 K6 Cl4 69.32(9) . 2_647 ?
 O15 K6 Cl5 126.30(10) . 2_547 ?
 O15 K6 Cl6 141.49(10) . 2_547 ?
 O15 K6 O12 64.34(12) . 2_557 ?
 O15 K6 O13 107.29(13) . 2_557 ?
 O15 K6 N4 85.38(14) . 2_557 ?
 O15 K6 K3 122.27(10) . 2_547 ?
 N4 K6 U1 96.22(12) 2_557 . ?
 N4 K6 U2 92.28(11) 2_557 2_547 ?
 N4 K6 Cl2 131.49(13) 2_557 . ?
 N4 K6 Cl3 91.66(12) 2_557 . ?
 N4 K6 Cl5 81.69(12) 2_557 2_547 ?
 N4 K6 K3 136.70(11) 2_557 2_547 ?

loop_
  _geom_torsion_atom_site_label_1
  _geom_torsion_atom_site_label_2
  _geom_torsion_atom_site_label_3
  _geom_torsion_atom_site_label_4
  _geom_torsion
  _geom_torsion_site_symmetry_1
  _geom_torsion_site_symmetry_2
  _geom_torsion_site_symmetry_3
  _geom_torsion_site_symmetry_4
  _geom_torsion_publ_flag
 U1 O3 N2 O4 3.9(6) . . . . ?
 U1 O3 N2 O5 -177.6(6) . . . . ?
 U1 O3 N2 K4 156.3(2) . . . 2_556 ?
 U1 O4 N2 O3 -4.0(6) . . . . ?
 U1 O4 N2 O5 177.6(6) . . . . ?
 U1 O4 N2 K4 -120.9(7) . . . 2_556 ?
 U2 O8 N1 O9 0.5(6) . . . . ?
 U2 O8 N1 O10 -177.1(6) . . . . ?
 U2 O8 N1 K2 120.3(10) . . . . ?
 U2 O9 N1 O8 -0.5(6) . . . . ?
 U2 O9 N1 O10 177.0(6) . . . . ?
 U2 O9 N1 K2 -160.6(2) . . . . ?
 Cl1 U1 O1 K3 96.2(6) . . . . ?
 Cl2 U1 O1 K3 176.3(6) . . . . ?
 Cl3 U1 O1 K3 -102.7(6) . . . . ?
 Cl4 U2 O6 K2 -41.2(13) . . . 2_657 ?
 Cl4 U2 O7 K5 134.2(9) . . . . ?
 Cl5 U2 O6 K2 -123.1(13) . . . 2_657 ?
 Cl5 U2 O7 K5 -143.9(9) . . . . ?
 Cl6 U2 O6 K2 158.5(13) . . . 2_657 ?
 Cl6 U2 O7 K5 -65.5(9) . . . . ?
 O3 U1 O1 K3 23.3(6) . . . . ?
 O4 U1 O1 K3 -27.8(6) . . . . ?
 O8 U2 O6 K2 33.9(13) . . . 2_657 ?
 O8 U2 O7 K5 59.1(9) . . . . ?
 O9 U2 O6 K2 84.7(13) . . . 2_657 ?
 O9 U2 O7 K5 8.3(9) . . . . ?
 K1 O11 N4 O12 103.8(7) 1_655 . . . ?
 K1 O11 N4 O13 -78.5(10) 1_655 . . . ?
 K1 O11 N4 K4 142.7(7) 1_655 . . . ?
 K1 O11 N4 K6 -164.9(8) 1_655 . . 2_547 ?
 K1 O14 N3 O15 -154.7(4) 2_557 . . . ?
 K1 O14 N3 O16 23.2(5) 2_557 . . . ?
 K1 O14 N3 K2 -127.78(17) 2_557 . . . ?
 K1 O14 N3 K3 113.8(3) 2_557 . . . ?
 K1 O14 N3 K5 -66.8(7) 2_557 . . 1_556 ?
 K1 O16 N3 O14 -23.9(5) 2_557 . . . ?
 K1 O16 N3 O15 154.0(4) 2_557 . . . ?
 K1 O16 N3 K2 67.4(10) 2_557 . . . ?
 K1 O16 N3 K3 -73.8(2) 2_557 . . . ?
 K1 O16 N3 K5 114.10(16) 2_557 . . 1_556 ?
 K2 O9 N1 U2 160.6(2) . . . . ?
 K2 O9 N1 O8 160.1(6) . . . . ?
 K2 O9 N1 O10 -22.4(6) . . . . ?
 K2 O10 N1 O8 -154.2(5) . . . . ?
 K2 O10 N1 O9 28.4(8) . . . . ?
 K2 O13 N4 O11 85.8(7) 2_647 . . . ?
 K2 O13 N4 O12 -96.6(6) 2_647 . . . ?
 K2 O13 N4 K4 172.4(4) 2_647 . . . ?
 K2 O13 N4 K6 -115.7(4) 2_647 . . 2_547 ?
 K2 O14 N3 O15 -26.9(5) . . . . ?
 K2 O14 N3 O16 151.0(4) . . . . ?
 K2 O14 N3 K1 127.78(17) . . . 2_557 ?
 K2 O14 N3 K3 -118.5(3) . . . . ?
 K2 O14 N3 K5 61.0(6) . . . 1_556 ?
 K2 O15 N3 O14 27.9(5) . . . . ?
 K2 O15 N3 O16 -150.0(4) . . . . ?
 K2 O15 N3 K1 -63.0(11) . . . 2_557 ?
 K2 O15 N3 K3 78.0(2) . . . . ?
 K2 O15 N3 K5 -109.67(16) . . . 1_556 ?
 K3 O8 N1 U2 157.5(2) 1_655 . . . ?
 K3 O8 N1 O9 158.0(6) 1_655 . . . ?
 K3 O8 N1 O10 -19.6(6) 1_655 . . . ?
 K3 O8 N1 K2 -82.2(10) 1_655 . . . ?
 K3 O10 N1 O8 25.6(8) 1_655 . . . ?
 K3 O10 N1 O9 -151.8(5) 1_655 . . . ?
 K3 O10 N1 K2 179.8(5) 1_655 . . . ?
 K3 O12 N4 O11 -77.7(7) 2_547 . . . ?
 K3 O12 N4 O13 104.6(6) 2_547 . . . ?
 K3 O12 N4 K4 -115.8(4) 2_547 . . . ?
 K3 O12 N4 K6 123.1(4) 2_547 . . 2_547 ?
 K3 O14 N3 O15 91.6(5) . . . . ?
 K3 O14 N3 O16 -90.6(5) . . . . ?
 K3 O14 N3 K1 -113.8(3) . . . 2_557 ?
 K3 O14 N3 K2 118.5(3) . . . . ?
 K3 O14 N3 K5 179.5(4) . . . 1_556 ?
 K4 O5 N2 O3 -35.5(8) 2_556 . . . ?
 K4 O5 N2 O4 142.9(5) 2_556 . . . ?
 K4 O11 N4 O12 -38.9(6) . . . . ?
 K4 O11 N4 O13 138.8(5) . . . . ?
 K4 O11 N4 K6 52.3(14) . . . 2_547 ?
 K4 O12 N4 O11 38.0(6) . . . . ?
 K4 O12 N4 O13 -139.7(6) . . . . ?
 K4 O12 N4 K6 -121.13(17) . . . 2_547 ?
 K4 O16 N3 O14 93.6(5) 2_557 . . . ?
 K4 O16 N3 O15 -88.6(6) 2_557 . . . ?
 K4 O16 N3 K1 117.4(4) 2_557 . . 2_557 ?
 K4 O16 N3 K2 -175.1(6) 2_557 . . . ?
 K4 O16 N3 K3 43.7(5) 2_557 . . . ?
 K4 O16 N3 K5 -128.5(4) 2_557 . . 1_556 ?
 K5 O5 N2 O3 147.7(5) 1_455 . . . ?
 K5 O5 N2 O4 -33.9(9) 1_455 . . . ?
 K5 O5 N2 K4 -176.8(6) 1_455 . . 2_556 ?
 K5 O11 N4 O12 -147.6(5) 2_646 . . . ?
 K5 O11 N4 O13 30.1(6) 2_646 . . . ?
 K5 O11 N4 K4 -108.69(15) 2_646 . . . ?
 K5 O11 N4 K6 -56.3(14) 2_646 . . 2_547 ?
 K5 O13 N4 O11 -35.8(7) 2_646 . . . ?
 K5 O13 N4 O12 141.9(5) 2_646 . . . ?
 K5 O13 N4 K4 50.9(7) 2_646 . . . ?
 K5 O13 N4 K6 122.8(3) 2_646 . . 2_547 ?
 K5 O15 N3 O14 137.5(4) 1_556 . . . ?
 K5 O15 N3 O16 -40.3(5) 1_556 . . . ?
 K5 O15 N3 K1 46.7(11) 1_556 . . 2_557 ?
 K5 O15 N3 K2 109.67(16) 1_556 . . . ?
 K5 O15 N3 K3 -172.29(17) 1_556 . . . ?
 K5 O16 N3 O14 -138.0(4) 1_556 . . . ?
 K5 O16 N3 O15 39.9(5) 1_556 . . . ?
 K5 O16 N3 K1 -114.10(16) 1_556 . . 2_557 ?
 K5 O16 N3 K2 -46.7(9) 1_556 . . . ?
 K5 O16 N3 K3 172.14(19) 1_556 . . . ?
 K6 O12 N4 O11 159.2(5) 2_547 . . . ?
 K6 O12 N4 O13 -18.5(6) 2_547 . . . ?
 K6 O12 N4 K4 121.13(17) 2_547 . . . ?
 K6 O13 N4 O11 -158.6(5) 2_547 . . . ?
 K6 O13 N4 O12 19.1(6) 2_547 . . . ?
 K6 O13 N4 K4 -71.9(7) 2_547 . . . ?
 K6 O15 N3 O14 -94.7(5) . . . . ?
 K6 O15 N3 O16 87.4(6) . . . . ?
 K6 O15 N3 K1 174.4(7) . . . 2_557 ?
 K6 O15 N3 K2 -122.6(4) . . . . ?
 K6 O15 N3 K3 -44.6(5) . . . . ?
 K6 O15 N3 K5 127.7(4) . . . 1_556 ?

_shelx_res_file
;
TITL mo_seo3_2t_new_sx_a.res in P2(1)
    mo_seo3_2t_new_sx.res
    created by SHELXL-2018/3 at 00:38:49 on 11-Oct-2020
REM Old TITL mo_seo3_2t_new_a.res in P2(1)/n
REM SHELXT solution in P2(1): R1 0.041, Rweak 0.016, Alpha 0.042
REM <I/s> 0.774 for 9 systematic absences, Orientation as input
REM Flack x = 0.490 ( 0.003 ) from 2461 Parsons' quotients
REM Formula found by SHELXT: Cl7 K6 N9 O15 U2
CELL 0.71073 7.8106 15.6882 10.5935 90 90.147 90
ZERR 4 0.0001 0.0002 0.0001 0 0.001 0
LATT -1
SYMM -X,0.5+Y,-Z
SFAC Cl K N O U
UNIT 12 12 8 32 4

L.S. 20
PLAN  9
SIZE 0.16 0.1 0.07
TEMP -173(2)
CONF
CONN 7 $U
htab
MORE -1
fmap 2 53
ACTA
TWIN -1 0 0 0 -1 0 0 0 -1 2
OMIT -4 55
REM <olex2.extras>
REM <HklSrc "%.\\mo_seo3_2t_new_sx.hkl">
REM </olex2.extras>

WGHT    0.016500    0.558500
BASF   0.48986
FVAR       0.27488
U1    5    0.061573    0.336604    0.818056    11.00000    0.00804    0.00678 =
         0.00678   -0.00045   -0.00048    0.00013
U2    5    0.455027    0.667936    0.683300    11.00000    0.00811    0.00680 =
         0.00662   -0.00072   -0.00023    0.00026
CL1   1    0.384668    0.371140    0.749664    11.00000    0.01009    0.01490 =
         0.01103    0.00129    0.00138    0.00036
CL2   1    0.232493    0.240596    0.988248    11.00000    0.01430    0.01373 =
         0.01771    0.00779   -0.00716   -0.00355
CL3   1   -0.209591    0.273467    0.947675    11.00000    0.01040    0.01401 =
         0.01533    0.00205    0.00276   -0.00009
CL4   1    0.727472    0.741040    0.569818    11.00000    0.01214    0.01107 =
         0.01580    0.00315    0.00353    0.00085
CL5   1    0.281834    0.760700    0.507657    11.00000    0.01374    0.01004 =
         0.01418    0.00266   -0.00462   -0.00137
CL6   1    0.127562    0.628209    0.737398    11.00000    0.00955    0.01756 =
         0.01260    0.00188    0.00035   -0.00223
O1    4    0.072665    0.424048    0.923321    11.00000    0.01517    0.01486 =
         0.01312   -0.00210   -0.00046   -0.00175
O2    4    0.048194    0.247796    0.716669    11.00000    0.01382    0.01479 =
         0.01284   -0.00316   -0.00278   -0.00438
O3    4    0.045532    0.427189    0.624383    11.00000    0.01096    0.02150 =
         0.01458    0.00472   -0.00005   -0.00160
O4    4   -0.194049    0.402634    0.719000    11.00000    0.01127    0.02081 =
         0.01031    0.00142    0.00093   -0.00396
O5    4   -0.192414    0.474749    0.542650    11.00000    0.02036    0.01612 =
         0.01754    0.00815   -0.01128   -0.00091
O6    4    0.446896    0.755503    0.788718    11.00000    0.01656    0.01020 =
         0.00904   -0.00437    0.00327    0.00287
O7    4    0.464467    0.581185    0.578894    11.00000    0.01720    0.00718 =
         0.01399   -0.00338   -0.00082    0.00179
O8    4    0.710440    0.604930    0.791747    11.00000    0.01121    0.00850 =
         0.01380    0.00226    0.00053    0.00073
O9    4    0.465993    0.570393    0.870476    11.00000    0.00864    0.01692 =
         0.01625    0.00646   -0.00296   -0.00218
O10   4    0.700631    0.523598    0.958481    11.00000    0.02035    0.01545 =
         0.01549    0.00637   -0.00901   -0.00124
O11   4    0.308386    0.064234    0.692796    11.00000    0.02705    0.01992 =
         0.02361    0.00529   -0.00505   -0.01252
O12   4    0.080183    0.007261    0.771076    11.00000    0.01173    0.02912 =
         0.01651   -0.00359    0.00184    0.00204
O13   4    0.310162   -0.068788    0.751365    11.00000    0.02270    0.01542 =
         0.01692   -0.00145   -0.00653    0.01276
O14   4    0.314752    0.540594    1.139899    11.00000    0.01895    0.01677 =
         0.01024    0.00363    0.00244   -0.00076
O15   4    0.273070    0.424944    1.247153    11.00000    0.01418    0.00971 =
         0.01768    0.00159   -0.00117   -0.00113
O16   4    0.273176    0.548317    1.342597    11.00000    0.01625    0.01719 =
         0.01212   -0.00590    0.00161   -0.00069
N1    3    0.627138    0.564226    0.875230    11.00000    0.01822    0.00956 =
         0.01100    0.00148   -0.00181   -0.00190
N2    3   -0.116607    0.435883    0.624832    11.00000    0.01601    0.00664 =
         0.01554   -0.00111   -0.00167   -0.00379
N3    3    0.285068    0.504202    1.243639    11.00000    0.01069    0.01282 =
         0.01255    0.00040   -0.00091   -0.00067
N4    3    0.233741    0.000515    0.739897    11.00000    0.01026    0.01490 =
         0.00811   -0.00211   -0.00212   -0.00098
K1    2   -0.468752    0.188622    0.742730    11.00000    0.01793    0.01204 =
         0.02314   -0.00176    0.00089    0.00072
K2    2    0.486743    0.393212    1.041053    11.00000    0.01162    0.01176 =
         0.01210   -0.00237   -0.00036   -0.00107
K3    2    0.031207    0.588086    1.008561    11.00000    0.01456    0.00919 =
         0.01092    0.00077   -0.00085    0.00055
K4    2    0.007907    0.115425    0.546169    11.00000    0.01213    0.01033 =
         0.00992    0.00013    0.00050    0.00065
K5    2    0.468710    0.421346    0.473171    11.00000    0.01588    0.00950 =
         0.01237   -0.00055   -0.00190    0.00042
K6    2   -0.013093    0.321618    1.233746    11.00000    0.01829    0.01276 =
         0.02412    0.00076   -0.00127   -0.00304
HKLF 4


REM  mo_seo3_2t_new_sx_a.res in P2(1)
REM wR2 = 0.0336, GooF = S = 1.031, Restrained GooF = 1.031 for all data
REM R1 = 0.0151 for 5802 Fo > 4sig(Fo) and 0.0160 for all 5961 data
REM 308 parameters refined using 1 restraints

END

WGHT      0.0165      0.5585

REM No hydrogen bonds found for HTAB generation

REM Highest difference peak  0.542,  deepest hole -0.416,  1-sigma level  0.094
Q1    1   0.0304  0.3819  0.7775  11.00000  0.05    0.54
Q2    1   0.4526  0.7245  0.7379  11.00000  0.05    0.51
Q3    1   0.1039  0.2839  0.8591  11.00000  0.05    0.50
Q4    1   0.0484  0.2848  0.7649  11.00000  0.05    0.47
Q5    1   0.4403  0.6088  0.6439  11.00000  0.05    0.46
Q6    1   0.0849  0.3930  0.8762  11.00000  0.05    0.45
Q7    1  -0.0384  0.3432  0.8596  11.00000  0.05    0.44
Q8    1   0.2785  0.3775  0.7823  11.00000  0.05    0.44
Q9    1  -0.0377  0.4026  0.9304  11.00000  0.05    0.42
;
_shelx_res_checksum                39637
_shelx_hkl_file
;
   0 -26   1   37.19   12.17
   0 -25   0   -0.48   11.52
   0 -25   1  242.48   18.36
   0 -25  -1  250.73   19.05
   0 -25  -2  307.47   20.85
   0 -25  -3   30.66   11.90
   0 -24   0  902.92   30.43
   0 -24  -1   24.52   10.71
   0 -24   1   18.70   10.41
   0 -24   2  308.30   18.61
   0 -24  -2  352.14   20.80
   0 -24  -3   60.23   12.59
   0 -24  -4    2.99   10.68
   0 -24  -5   -2.91   11.00
   0 -23   0   11.37    9.38
   0 -23   1  104.02   13.43
   0 -23  -1  144.43   14.96
   0 -23   2  432.55   20.41
   0 -23  -2  471.65   22.52
   0 -23  -3   48.91   11.17
   0 -23  -4  924.88   30.87
   0 -23  -5   27.04   11.20
   0 -23  -6  192.34   17.87
   0 -23  -7   87.55   15.01
   0 -22   0  313.15   17.80
   0 -22   1   75.43   11.54
   0 -22  -1   64.31   11.13
   0 -22   2   45.22    9.91
   0 -22  -2   22.33    9.46
   0 -22  -3  723.88   26.43
   0 -22  -4   98.48   13.63
   0 -22  -5  424.52   21.71
   0 -22  -6  339.43   19.97
   0 -22  -7   15.00   11.61
   0 -22  -8  506.47   24.74
   0 -21   0   14.54    9.03
   0 -21  -1 1180.52   30.90
   0 -21   1 1245.79   30.54
   0 -21   2   27.20    8.98
   0 -21  -2   21.50    9.08
   0 -21  -3  240.57   16.35
   0 -21  -4  151.23   14.38
   0 -21  -5  255.69   17.19
   0 -21  -5  233.99   17.05
   0 -21  -6   39.96   10.88
   0 -21  -6   36.93   12.19
   0 -21  -7  625.13   25.90
   0 -21  -8   20.98   10.82
   0 -21  -9  242.52   18.61
   0 -21 -10   51.84   13.03
   0 -21 -10   42.61   12.16
   0 -20   0  476.61   19.60
   0 -20  -1  534.18   20.63
   0 -20   1  465.56   18.80
   0 -20  -2   93.18   11.22
   0 -20   2   97.48   10.05
   0 -20   3  328.03   15.85
   0 -20  -3  348.37   18.11
   0 -20  -4    8.30    8.46
   0 -20  -5 1198.86   32.03
   0 -20  -6   30.57   11.30
   0 -20  -6   20.34    9.84
   0 -20  -7   26.17   11.75
   0 -20  -7    5.99    9.29
   0 -20  -8   60.19   13.40
   0 -20  -8   90.68   13.01
   0 -20  -9  251.36   17.53
   0 -20  -9  216.22   19.06
   0 -20 -10   12.22   13.71
   0 -20 -10    3.58   10.62
   0 -20 -10   10.18   10.26
   0 -20 -11  758.74   27.20
   0 -20 -11  761.96   29.82
   0 -19   0    7.38    7.29
   0 -19   1  358.73   15.99
   0 -19  -1  352.31   16.75
   0 -19   2  364.02   16.04
   0 -19  -2  378.24   17.34
   0 -19  -3  255.13   15.38
   0 -19   3  240.70   13.49
   0 -19  -4 1086.16   28.72
   0 -19  -5  211.40   14.89
   0 -19  -6  233.27   16.51
   0 -19  -6  266.47   16.68
   0 -19  -7  352.17   18.38
   0 -19  -7  380.20   20.44
   0 -19  -8   27.01   10.66
   0 -19  -8   23.92   11.24
   0 -19  -9  112.88   15.19
   0 -19  -9  124.36   13.71
   0 -19 -10  555.66   26.83
   0 -19 -10  483.80   22.98
   0 -19 -10  489.30   22.00
   0 -19 -11  121.47   16.02
   0 -19 -11   87.02   12.86
   0 -19 -11  107.14   16.40
   0 -19 -12  291.60   22.56
   0 -19 -12  330.50   21.92
   0 -18   0 1116.87   25.92
   0 -18   1   38.72    7.94
   0 -18  -1   19.45    7.47
   0 -18   2  751.80   20.97
   0 -18  -2  761.76   22.72
   0 -18  -3   17.99    7.75
   0 -18   3   14.94    6.56
   0 -18  -4  131.53   11.70
   0 -18  -5   24.81    8.50
   0 -18  -6  694.82   24.11
   0 -18  -6  738.96   24.20
   0 -18  -7  159.48   13.23
   0 -18  -7  151.45   15.01
   0 -18  -8 1608.90   36.02
   0 -18  -8 1747.43   39.19
   0 -18  -9    1.04    8.53
   0 -18  -9   -8.59   11.92
   0 -18 -10   50.34   13.18
   0 -18 -10   68.62   11.44
   0 -18 -10   49.93   12.11
   0 -18 -11   65.16   15.19
   0 -18 -11   70.80   13.29
   0 -18 -11   82.00   12.00
   0 -18 -12    4.10   12.01
   0 -18 -12   20.00   15.49
   0 -17   0   -3.04    5.96
   0 -17  -1  120.96   10.02
   0 -17   1  136.37   10.14
   0 -17  -2  795.43   21.90
   0 -17   2  758.31   19.93
   0 -17   3   43.88    7.26
   0 -17  -3   43.01    8.24
   0 -17  -4 1716.85   33.22
   0 -17  -5  214.79   13.67
   0 -17  -6  177.64   13.09
   0 -17  -6  180.43   13.84
   0 -17  -7  242.04   15.16
   0 -17  -7  196.92   15.09
   0 -17  -8   25.66   10.96
   0 -17  -8   25.06    8.30
   0 -17  -9  181.40   14.03
   0 -17  -9  197.35   16.94
   0 -17 -10  598.94   23.74
   0 -17 -10  638.01   27.00
   0 -17 -11    2.82   10.11
   0 -17 -11    2.94    9.10
   0 -17 -11  -12.82   12.65
   0 -17 -12  450.04   25.16
   0 -17 -12  517.79   24.64
   0 -17 -13   44.75   14.02
   0 -17 -13   47.28   16.20
   0 -16   0   92.00    8.29
   0 -16   1  842.31   20.52
   0 -16  -1  813.77   20.74
   0 -16  -2   11.83    6.12
   0 -16   2   19.61    5.69
   0 -16  -3  748.67   21.03
   0 -16   3  771.36   18.66
   0 -16  -4  173.11   11.91
   0 -16   4  150.37    9.11
   0 -16  -5  872.92   23.69
   0 -16  -6  850.53   24.46
   0 -16  -6  873.01   24.00
   0 -16  -7  100.33   10.77
   0 -16  -7  100.89   12.00
   0 -16  -8  897.88   27.40
   0 -16  -8  878.20   25.02
   0 -16  -9  587.02   21.21
   0 -16  -9  581.07   23.64
   0 -16 -10  230.51   18.08
   0 -16 -10  212.44   14.10
   0 -16 -10  197.45   15.17
   0 -16 -11  275.03   19.87
   0 -16 -11  258.64   17.72
   0 -16 -11  275.22   15.65
   0 -16 -12    9.42   13.03
   0 -16 -12   -2.55   11.41
   0 -16 -13  397.36   23.18
   0 -16 -13  402.67   24.99
   0 -15   0   -7.79    5.91
   0 -15  -1 1605.47   27.31
   0 -15   1 1571.49   25.91
   0 -15  -2   82.35    8.19
   0 -15   2  102.31    7.86
   0 -15   3  200.37    9.78
   0 -15  -3  193.48   11.26
   0 -15  -4    7.99    6.54
   0 -15   4    5.06    4.52
   0 -15  -5  360.69   15.33
   0 -15  -6  213.78   13.01
   0 -15  -6  224.79   13.88
   0 -15  -7 1573.57   33.17
   0 -15  -7 1728.31   32.38
   0 -15  -8   15.74    9.68
   0 -15  -8   22.88    8.24
   0 -15  -9 1300.00   29.09
   0 -15  -9 1261.68   32.83
   0 -15 -10    6.17   10.48
   0 -15 -10    6.45    8.62
   0 -15 -10   16.57    7.86
   0 -15 -11    5.59    7.28
   0 -15 -11    7.57    9.64
   0 -15 -11   -5.88   11.19
   0 -15 -12   12.39   10.65
   0 -15 -12   33.89   13.04
   0 -15 -13  261.43   21.38
   0 -15 -13  278.29   19.60
   0 -15 -14    9.88   12.57
   0 -15 -14    7.98   14.77
   0 -14   0  908.06   19.77
   0 -14  -1   59.69    6.69
   0 -14   1   77.66    6.82
   0 -14  -2  109.23    8.49
   0 -14   2  117.14    7.78
   0 -14   3 2550.26   29.53
   0 -14  -3 2534.41   34.58
   0 -14  -4   31.62    6.65
   0 -14   4   37.57    5.22
   0 -14  -5  349.11   14.44
   0 -14  -6  290.65   13.88
   0 -14  -6  313.96   14.98
   0 -14  -7  183.68   13.33
   0 -14  -7  205.58   12.33
   0 -14  -8  397.61   18.70
   0 -14  -8  435.96   17.13
   0 -14  -9  855.95   27.10
   0 -14  -9  872.53   23.05
   0 -14 -10   93.76   13.47
   0 -14 -10   95.93   10.20
   0 -14 -10   80.47   11.55
   0 -14 -11  802.86   28.97
   0 -14 -11  882.60   22.95
   0 -14 -11  879.47   27.56
   0 -14 -12   13.65   12.69
   0 -14 -12   20.25   10.81
   0 -14 -13  443.72   25.74
   0 -14 -13  448.77   23.06
   0 -14 -14   73.72   16.20
   0 -14 -14   92.85   15.00
   0 -13   0    3.69    4.16
   0 -13   1  948.82   18.38
   0 -13  -1  922.67   19.33
   0 -13  -2 1082.04   21.25
   0 -13   2 1073.10   18.85
   0 -13   3   75.00    5.94
   0 -13  -3   63.39    6.93
   0 -13   4 1265.44   19.05
   0 -13  -4 1285.49   24.61
   0 -13  -5  171.01   10.44
   0 -13  -6  177.19   11.86
   0 -13  -6  155.01   10.19
   0 -13  -7  633.47   18.48
   0 -13  -7  616.93   20.56
   0 -13  -8  207.33   11.98
   0 -13  -8  184.36   13.68
   0 -13  -9  484.01   18.15
   0 -13  -9  461.07   16.50
   0 -13  -9  532.72   21.58
   0 -13 -10  950.13   23.04
   0 -13 -10  930.34   26.32
   0 -13 -10  901.06   28.47
   0 -13 -11   66.54   11.23
   0 -13 -11   39.89    7.66
   0 -13 -11   47.29   12.09
   0 -13 -12  884.49   31.30
   0 -13 -12  897.60   28.88
   0 -13 -13    0.79   10.46
   0 -13 -13   -1.23   13.30
   0 -13 -14   72.39   16.61
   0 -13 -14   69.64   13.36
   0 -13 -15  434.92   25.14
   0 -12   0 5213.58   41.10
   0 -12  -1   15.01    4.59
   0 -12   1   15.54    4.33
   0 -12   2  653.34   13.90
   0 -12  -2  651.57   15.93
   0 -12  -3   61.13    6.57
   0 -12   3   81.09    5.59
   0 -12  -4   57.93    6.77
   0 -12   4   50.40    4.77
   0 -12  -5   31.58    6.05
   0 -12   5   24.92    3.81
   0 -12  -6 1858.92   31.04
   0 -12  -6 1866.82   29.23
   0 -12  -7  105.60    8.85
   0 -12  -7  105.13   10.52
   0 -12  -8 1209.04   24.43
   0 -12  -8 1176.77   27.99
   0 -12  -9   83.44    8.40
   0 -12  -9   75.24    9.48
   0 -12  -9   70.42   11.24
   0 -12 -10  893.69   21.39
   0 -12 -10  845.32   27.08
   0 -12 -10  834.05   24.25
   0 -12 -11   29.66   10.87
   0 -12 -11   34.45    9.68
   0 -12 -11   28.79    6.68
   0 -12 -12  312.24   18.29
   0 -12 -12  256.86   19.19
   0 -12 -13   23.17   11.76
   0 -12 -13   21.51   12.78
   0 -12 -14  396.69   24.74
   0 -12 -14  479.51   24.20
   0 -12 -15   28.36   15.66
   0 -12 -15   -1.76   12.92
   0 -11   0    3.05    3.56
   0 -11   1   58.01    5.16
   0 -11  -1   58.66    5.61
   0 -11   2 1744.81   20.92
   0 -11  -2 1780.27   24.32
   0 -11  -3   26.85    5.08
   0 -11   3   31.66    4.17
   0 -11  -4  723.95   17.08
   0 -11   4  719.79   12.55
   0 -11   5 1426.29   16.76
   0 -11  -5 1541.00   24.96
   0 -11  -6 1769.51   29.55
   0 -11  -6 1753.92   27.08
   0 -11  -7  785.89   18.98
   0 -11  -7  817.76   22.10
   0 -11  -8  447.06   14.86
   0 -11  -8  401.93   17.19
   0 -11  -9  804.26   22.01
   0 -11  -9  744.40   23.88
   0 -11  -9  713.31   18.24
   0 -11 -10 1008.22   25.93
   0 -11 -10 1024.02   21.45
   0 -11 -11   68.15    7.43
   0 -11 -11   82.40   12.92
   0 -11 -11   56.53    9.89
   0 -11 -12  913.13   31.07
   0 -11 -12  995.54   29.50
   0 -11 -13   40.74   11.30
   0 -11 -13    8.87   12.08
   0 -11 -14   46.61   12.45
   0 -11 -14   81.16   16.05
   0 -11 -15   58.65   16.72
   0 -11 -15   38.88   13.67
   0 -10   0  947.08   15.84
   0 -10  -1   97.15    6.22
   0 -10   1   90.69    5.55
   0 -10   2  347.60    9.01
   0 -10  -2  360.70   10.95
   0 -10   3 2705.70   23.01
   0 -10  -3 2669.78   29.31
   0 -10  -4  244.11    9.95
   0 -10   4  218.95    6.70
   0 -10  -5 1562.57   24.07
   0 -10  -5 1580.96   25.55
   0 -10   5 1569.35   15.84
   0 -10  -6  932.88   19.05
   0 -10  -6  884.76   20.87
   0 -10  -7   70.51    7.02
   0 -10  -7   82.60    9.12
   0 -10  -8  558.18   16.94
   0 -10  -8  570.03   15.46
   0 -10  -8  533.61   18.58
   0 -10  -9  303.34   14.03
   0 -10  -9  277.86   15.35
   0 -10  -9  330.88   12.18
   0 -10 -10  328.81   15.71
   0 -10 -10  316.58   12.00
   0 -10 -10  327.42   17.84
   0 -10 -11 1449.68   32.52
   0 -10 -11 1409.91   34.68
   0 -10 -12  126.35   13.33
   0 -10 -12  136.35   15.51
   0 -10 -13  227.94   16.68
   0 -10 -13  180.54   17.68
   0 -10 -14   94.36   14.40
   0 -10 -14   71.25   15.79
   0 -10 -15    7.20   13.82
   0 -10 -15   11.46   11.75
   0 -10 -16  287.54   22.46
   0  -9   0   -0.65    2.97
   0  -9  -1 2158.74   23.12
   0  -9   1 2186.35   21.16
   0  -9   2   44.81    3.79
   0  -9  -2   42.85    4.63
   0  -9   3   17.41    2.73
   0  -9  -3   27.77    4.63
   0  -9  -4  107.72    6.89
   0  -9   4  102.70    4.35
   0  -9  -5 1082.22   20.67
   0  -9   5 1028.62   11.34
   0  -9  -5 1050.98   18.91
   0  -9  -6    7.85    6.63
   0  -9  -6    4.64    3.94
   0  -9  -7 3181.27   39.72
   0  -9  -7 3307.49   34.05
   0  -9  -8   42.27    6.87
   0  -9  -8   65.39    9.01
   0  -9  -8   52.89    5.95
   0  -9  -9  979.95   19.10
   0  -9  -9 1000.64   23.26
   0  -9  -9 1027.43   26.36
   0  -9 -10    3.35    7.08
   0  -9 -10    5.53    8.27
   0  -9 -10    5.92    4.81
   0  -9 -11  119.99   13.35
   0  -9 -11  141.96   12.29
   0  -9 -12   34.25   10.08
   0  -9 -12   28.69   11.55
   0  -9 -13  486.42   24.52
   0  -9 -13  602.92   24.26
   0  -9 -14   25.45   11.67
   0  -9 -14   39.20   14.13
   0  -9 -15  852.68   34.88
   0  -9 -15  789.85   30.41
   0  -9 -16    5.58   13.04
   0  -9 -16    5.38   15.10
   0  -8   0  388.64    9.22
   0  -8  -1  384.90    9.56
   0  -8   1  409.77    8.78
   0  -8   2 1023.93   12.61
   0  -8  -2  964.94   15.46
   0  -8  -3 2955.35   27.66
   0  -8   3 2970.05   20.05
   0  -8  -4  555.73   12.80
   0  -8   4  526.26    7.77
   0  -8  -5 3505.22   31.88
   0  -8   5 3405.00   17.68
   0  -8  -5 3359.82   34.60
   0  -8  -6  579.02   13.63
   0  -8  -6  554.63   16.13
   0  -8  -7   50.63    6.26
   0  -8  -7   45.35    7.55
   0  -8  -7   50.22    5.47
   0  -8  -8  228.21   11.14
   0  -8  -8  235.93   13.05
   0  -8  -8  234.01    9.34
   0  -8  -9  106.82    7.00
   0  -8  -9  110.38    9.51
   0  -8  -9  101.95   10.82
   0  -8 -10  179.70   12.27
   0  -8 -10  171.20   13.51
   0  -8 -10  180.65    7.79
   0  -8 -11 1879.04   35.71
   0  -8 -11 1862.62   38.86
   0  -8 -12   82.66   13.43
   0  -8 -12   71.71   10.90
   0  -8 -13  336.43   21.24
   0  -8 -13  372.68   19.89
   0  -8 -14  235.42   18.35
   0  -8 -14  196.69   19.24
   0  -8 -15  -10.19   12.66
   0  -8 -15    4.98   13.52
   0  -8 -16  102.51   19.17
   0  -8 -16  123.29   16.56
   0  -7   0    0.26    2.48
   0  -7   1 1539.58   15.16
   0  -7  -1 1488.66   17.00
   0  -7  -2 1471.23   17.69
   0  -7   2 1432.07   13.68
   0  -7   3 1105.78   10.71
   0  -7  -3 1066.45   15.87
   0  -7  -4 3494.42   29.30
   0  -7   4 3562.81   16.95
   0  -7  -5   47.38    6.38
   0  -7   5   54.30    2.10
   0  -7  -5   50.60    4.81
   0  -7  -6  666.74   16.96
   0  -7  -6  669.52   13.87
   0  -7  -7  897.99   20.92
   0  -7  -7  911.56   18.39
   0  -7  -7  915.57   16.11
   0  -7  -8  105.40    6.46
   0  -7  -8  110.92    8.39
   0  -7  -8  106.45    9.85
   0  -7  -9   74.94    5.61
   0  -7  -9   73.93    8.28
   0  -7  -9   72.21    9.51
   0  -7 -10 1205.62   26.56
   0  -7 -10 1214.61   15.44
   0  -7 -10 1190.66   29.04
   0  -7 -11   18.67    7.90
   0  -7 -11   15.52    9.01
   0  -7 -12  937.45   29.96
   0  -7 -12  920.09   26.74
   0  -7 -13  666.60   24.89
   0  -7 -13  686.21   27.88
   0  -7 -14  338.13   22.25
   0  -7 -14  332.95   19.77
   0  -7 -15  169.33   16.92
   0  -7 -15  194.18   20.48
   0  -7 -16  189.01   21.13
   0  -7 -16  200.11   18.68
   0  -6   0  435.71    8.12
   0  -6   1  293.85    6.30
   0  -6  -1  319.97    7.56
   0  -6   2 7824.35   27.41
   0  -6  -2 7977.60   37.82
   0  -6  -3  138.84    5.98
   0  -6   3  143.39    3.49
   0  -6  -4  288.35    9.46
   0  -6  -4  253.64    7.96
   0  -6   4  265.39    3.59
   0  -6  -5    9.59    3.03
   0  -6  -5   11.96    5.22
   0  -6  -6 1114.83   18.10
   0  -6  -6 1120.69   16.48
   0  -6  -6 1130.68   20.97
   0  -6  -7   82.61    7.01
   0  -6  -7   80.57    8.30
   0  -6  -7   84.36    5.43
   0  -6  -8 2300.99   22.78
   0  -6  -8 2222.11   33.88
   0  -6  -8 2274.91   30.54
   0  -6  -9    7.72    6.06
   0  -6  -9    2.03    3.02
   0  -6  -9    5.31    7.08
   0  -6 -10  138.27   11.94
   0  -6 -10  133.15   10.61
   0  -6 -11   15.82    9.46
   0  -6 -11   35.82    8.58
   0  -6 -12  288.73   18.09
   0  -6 -12  290.71   16.73
   0  -6 -13   45.24   10.33
   0  -6 -13   49.36   12.41
   0  -6 -14 1361.88   39.69
   0  -6 -14 1369.84   35.87
   0  -6 -15   18.46   14.68
   0  -6 -15    9.86   11.11
   0  -6 -16  504.12   25.94
   0  -6 -16  491.01   28.39
   0  -6 -17   -1.12   14.05
   0  -5   0    2.48    2.26
   0  -5   1   19.79    2.24
   0  -5  -1   23.95    2.99
   0  -5  -2 2266.29   18.96
   0  -5   2 2224.31   12.44
   0  -5  -3  842.21   12.36
   0  -5   3  853.47    5.91
   0  -5  -4 7016.95   36.12
   0  -5  -4 7086.74   42.05
   0  -5  -5  170.42    8.39
   0  -5  -5  184.68    6.56
   0  -5  -6  281.34    7.96
   0  -5  -6  282.23   11.30
   0  -5  -6  310.78   10.15
   0  -5  -7 3375.42   33.55
   0  -5  -7 3427.96   38.24
   0  -5  -7 3373.74   25.62
   0  -5  -8   14.91    7.11
   0  -5  -8    6.84    5.26
   0  -5  -8   16.01    3.08
   0  -5  -9  319.34    6.00
   0  -5  -9  303.64   14.80
   0  -5  -9  298.17   13.24
   0  -5 -10 1240.88   26.26
   0  -5 -10 1172.25   28.36
   0  -5 -11   70.21    9.53
   0  -5 -11   79.38   11.38
   0  -5 -12  977.33   27.21
   0  -5 -12  937.64   29.37
   0  -5 -13   93.34   13.94
   0  -5 -13   92.85   12.32
   0  -5 -14  155.62   15.35
   0  -5 -14  164.72   17.73
   0  -5 -15  246.29   21.37
   0  -5 -15  303.33   20.48
   0  -5 -16  209.77   21.23
   0  -5 -16  240.74   19.98
   0  -5 -17   16.72   14.60
   0  -4   0 1708.69   12.61
   0  -4   1 2231.62   12.48
   0  -4  -1 2265.41   15.95
   0  -4   2 1594.28    8.00
   0  -4  -2 1621.47   14.67
   0  -4  -3 3746.91   23.40
   0  -4  -3 3768.82   26.39
   0  -4  -4   67.67    5.61
   0  -4  -4   76.61    4.26
   0  -4  -5 2956.53   22.08
   0  -4  -5 2912.09   25.75
   0  -4  -5 3025.58   29.49
   0  -4  -6  445.92    8.85
   0  -4  -6  425.66   13.02
   0  -4  -6  424.03   11.32
   0  -4  -7   46.79    6.91
   0  -4  -7   44.08    3.44
   0  -4  -7   54.08    5.88
   0  -4  -8  537.87   17.02
   0  -4  -8  556.86    7.46
   0  -4  -8  552.71   15.49
   0  -4  -9  248.72   13.59
   0  -4  -9  265.08   12.25
   0  -4 -10    9.12    6.67
   0  -4 -10   17.94    8.00
   0  -4 -11  851.36   23.83
   0  -4 -11  851.62   25.73
   0  -4 -12   13.44    8.61
   0  -4 -12   19.15   10.54
   0  -4 -13  452.96   20.58
   0  -4 -13  413.54   21.90
   0  -4 -14  668.22   26.01
   0  -4 -14  731.65   29.23
   0  -4 -15   14.36   11.19
   0  -4 -15    5.34   13.83
   0  -4 -16  132.51   16.77
   0  -4 -16  130.55   19.20
   0  -4 -17  406.52   25.77
   0  -3   0   -0.13    1.34
   0  -3   1 7356.47   17.67
   0  -3  -1 7261.80   25.30
   0  -3  -2  595.62    8.18
   0  -3  -3 1580.41   16.88
   0  -3  -3 1481.79   13.41
   0  -3  -4  305.61    6.61
   0  -3  -4  289.65    7.62
   0  -3  -4  297.69    8.84
   0  -3  -5 1888.87   15.75
   0  -3  -5 1779.59   22.75
   0  -3  -5 1817.93   19.87
   0  -3  -6   44.57    3.00
   0  -3  -6   43.30    5.99
   0  -3  -6   30.47    4.58
   0  -3  -7 2464.59   28.92
   0  -3  -7 2579.72   13.82
   0  -3  -7 2545.24   32.16
   0  -3  -8  121.91    8.35
   0  -3  -8  115.84    9.51
   0  -3  -9 1751.39   28.83
   0  -3  -9 1786.49   31.88
   0  -3 -10   15.31    7.16
   0  -3 -10   16.37    8.31
   0  -3 -11   21.60    7.28
   0  -3 -11    9.12    8.53
   0  -3 -12    8.13    7.80
   0  -3 -12   16.92    9.64
   0  -3 -13  733.63   27.78
   0  -3 -13  705.00   24.96
   0  -3 -14  110.10   16.06
   0  -3 -14   91.04   13.69
   0  -3 -15  932.21   32.43
   0  -3 -15  943.41   35.15
   0  -3 -16    2.55   14.01
   0  -3 -16    6.84   11.99
   0  -3 -17  380.00   24.94
   0  -2   0 1294.03    7.58
   0  -2  -1  926.64    7.73
   0  -2  -2  348.88    5.53
   0  -2  -2  332.36    6.63
   0  -2  -3 4241.85   19.59
   0  -2  -3 4186.07   22.74
   0  -2  -3 4241.60   26.12
   0  -2  -4  166.86    5.92
   0  -2  -4  189.63    7.33
   0  -2  -4  188.77    4.56
   0  -2  -5 2207.97   13.51
   0  -2  -5 2244.92   12.96
   0  -2  -5 2266.74   22.53
   0  -2  -5 2274.69   25.09
   0  -2  -6  568.39   14.43
   0  -2  -6  546.60   12.79
   0  -2   7  895.55    7.32
   0  -2  -7  938.49   18.04
   0  -2  -7  937.39   19.84
   0  -2  -8  895.49   19.31
   0  -2  -8  851.00   20.65
   0  -2   8  806.64    8.79
   0  -2  -9 1543.23   29.61
   0  -2  -9 1426.83   26.23
   0  -2 -10  263.95   14.58
   0  -2 -10  275.26   13.61
   0  -2 -11  784.39   24.82
   0  -2 -11  798.13   23.10
   0  -2 -12  156.77   14.69
   0  -2 -12  148.18   12.56
   0  -2 -13  472.81   21.32
   0  -2 -13  444.25   22.53
   0  -2 -14  164.84   16.09
   0  -2 -14  149.16   16.51
   0  -2 -15  106.16   15.04
   0  -2 -15   98.22   16.61
   0  -2 -16  238.44   20.77
   0  -2 -16  210.55   21.45
   0  -2 -17  450.41   26.99
   0  -1  -1 1096.03    7.72
   0  -1  -1 1058.03    6.55
   0  -1  -2 2809.90   15.06
   0  -1  -2 2844.37   11.55
   0  -1  -2 2856.28   11.99
   0  -1  -2 2798.87   17.04
   0  -1  -3    9.73    3.50
   0  -1  -3   10.32    1.43
   0  -1  -3    6.53    2.46
   0  -1  -3    9.32    1.53
   0  -1  -4 1575.14   18.33
   0  -1  -4 1525.03   16.49
   0  -1  -5 1032.43   17.00
   0  -1   5 1042.19    6.29
   0  -1  -5 1088.04   15.82
   0  -1  -6  923.64   16.41
   0  -1   6  898.80    7.71
   0  -1  -6  925.32   17.98
   0  -1  -7  303.07   11.97
   0  -1   7  316.50    5.66
   0  -1  -7  291.64   10.83
   0  -1   8  449.35    7.65
   0  -1  -8  434.97   13.92
   0  -1  -8  422.26   15.06
   0  -1  -9  948.20   21.61
   0  -1  -9  985.20   23.92
   0  -1 -10 1704.43   30.95
   0  -1 -10 1721.34   33.40
   0  -1 -11    3.59    8.21
   0  -1 -11    8.74    7.38
   0  -1 -12 1253.77   32.89
   0  -1 -12 1285.39   31.30
   0  -1 -13   81.14   12.98
   0  -1 -13   56.36   11.90
   0  -1 -14   23.69   10.75
   0  -1 -14   34.30   13.24
   0  -1 -15  315.22   22.62
   0  -1 -15  304.02   20.57
   0  -1 -16   12.91   13.75
   0  -1 -16   32.29   14.10
   0  -1 -17  121.60   19.91
   0  -1 -17  115.39   17.73
   0   0  -1   -0.93    0.72
   0   0  -1    1.48    0.96
   0   0  -2 3129.00   16.65
   0   0  -2 3219.81   18.00
   0   0  -3   27.25    3.22
   0   0  -3   24.34    3.66
   0   0   3   26.23    1.39
   0   0  -4 3383.55   25.21
   0   0  -4 3410.75   26.78
   0   0   4 3485.45   13.73
   0   0   5   11.81    1.67
   0   0  -5    7.01    4.03
   0   0  -5    5.61    3.53
   0   0  -6 1175.38   18.59
   0   0  -6 1178.34   20.10
   0   0   6 1137.28   10.69
   0   0  -7   54.69    6.17
   0   0  -7   58.36    7.21
   0   0   7   64.86    3.48
   0   0  -8 1167.03   22.46
   0   0   8 1176.25   13.57
   0   0  -8 1197.25   24.20
   0   0   9    2.38    2.73
   0   0  -9   -6.32    5.98
   0   0  -9    4.68    7.24
   0   0 -10   43.02    7.74
   0   0 -10   30.09    8.45
   0   0 -11    5.47    7.53
   0   0 -11    4.86    8.47
   0   0 -12  301.04   18.06
   0   0 -12  302.12   16.85
   0   0 -13    2.65    9.33
   0   0 -13    1.97   10.72
   0   0 -14 1143.77   33.95
   0   0 -14 1043.82   34.45
   0   0 -15   -3.84   12.38
   0   0 -15    1.57   11.89
   0   0 -16  985.01   35.70
   0   0 -16 1016.06   38.25
   0   0 -17   22.60   16.01
   0   0 -17   -3.50   13.99
   0   1  -1 1098.83    8.16
   0   1   1 1113.48    6.67
   0   1  -1 1087.50    8.75
   0   1  -2 2797.78   17.53
   0   1  -2 2813.11   17.24
   0   1   2 2834.76   12.38
   0   1  -3    8.02    3.41
   0   1   3   14.36    1.83
   0   1  -3    6.55    3.12
   0   1   4 1574.55   11.75
   0   1  -4 1632.12   18.86
   0   1  -4 1501.27   17.58
   0   1  -5 1038.08   17.15
   0   1  -5 1017.40   16.35
   0   1   5 1034.29   10.59
   0   1   6  911.27   10.94
   0   1  -6  890.51   17.69
   0   1  -6  875.26   16.81
   0   1   7  331.59    7.52
   0   1  -7  331.52   12.56
   0   1  -7  295.94   11.43
   0   1   8  445.55    9.33
   0   1  -8  425.46   15.04
   0   1  -8  403.33   14.28
   0   1  -9  926.21   22.36
   0   1   9  956.26   14.59
   0   1  -9 1003.75   24.12
   0   1 -10 1717.63   33.33
   0   1 -10 1717.04   32.30
   0   1 -11   10.17    8.09
   0   1 -11   12.68    8.52
   0   1 -12 1358.80   32.59
   0   1 -12 1279.84   33.47
   0   1 -13   64.97   13.41
   0   1 -13   81.92   12.32
   0   1 -14   38.87   11.90
   0   1 -14   35.89   12.79
   0   1 -15  321.10   21.34
   0   1 -15  292.15   22.05
   0   1 -16   33.49   15.95
   0   1 -16   38.40   14.38
   0   1 -17   73.22   17.31
   0   1 -17   89.18   17.40
   0   2   0 1342.24    7.66
   0   2   0 1303.09    7.63
   0   2   0 1353.40    7.36
   0   2  -1  983.11   10.66
   0   2   1  961.94    7.98
   0   2  -2  346.19    7.01
   0   2  -2  324.13    7.46
   0   2   2  330.96    5.51
   0   2  -3 4179.03   27.64
   0   2   3 4251.70   20.47
   0   2  -3 4218.93   26.82
   0   2   4  188.83    5.05
   0   2  -4  173.30    7.20
   0   2  -4  163.68    7.04
   0   2  -5 2223.90   25.21
   0   2   5 2226.28   17.51
   0   2  -5 2203.36   24.93
   0   2   6  577.27    9.84
   0   2  -6  545.49   14.20
   0   2  -6  567.43   14.34
   0   2   7  925.74   13.43
   0   2  -7  932.40   19.69
   0   2  -7  932.97   19.97
   0   2  -8  836.87   20.80
   0   2  -8  808.06   20.03
   0   2   8  851.15   13.69
   0   2  -9 1423.33   27.88
   0   2   9 1536.17   19.53
   0   2  -9 1436.98   28.95
   0   2 -10  245.14   13.80
   0   2 -10  255.59   14.55
   0   2  10  267.33    9.33
   0   2 -11  782.92   25.06
   0   2 -11  764.55   24.07
   0   2 -12  158.34   14.43
   0   2 -12  163.95   13.78
   0   2 -13  453.22   22.25
   0   2 -13  464.51   23.11
   0   2 -14  118.13   15.58
   0   2 -14  133.56   16.28
   0   2 -15   92.38   15.53
   0   2 -15  105.03   16.25
   0   2 -16  230.14   21.49
   0   2 -16  228.23   21.90
   0   2 -17  477.11   29.50
   0   2 -17  413.54   28.36
   0   3   0    0.98    1.38
   0   3   0    0.72    1.52
   0   3   0   -1.00    1.38
   0   3   1 7335.72   25.53
   0   3  -2  545.95   10.79
   0   3   2  554.60    8.01
   0   3  -2  553.20    9.45
   0   3  -3 1545.90   17.38
   0   3   3 1485.10   13.97
   0   3  -3 1491.32   18.74
   0   3  -4  295.48    9.00
   0   3   4  294.17    6.87
   0   3  -4  289.29    9.53
   0   3  -5 1781.17   23.79
   0   3  -5 1779.84   23.07
   0   3   5 1874.97   17.84
   0   3  -6   41.11    5.87
   0   3  -6   46.55    6.19
   0   3   6   39.11    3.70
   0   3  -7 2445.10   32.21
   0   3   7 2485.60   23.11
   0   3  -7 2389.50   32.10
   0   3  -8  129.15    9.88
   0   3   8  128.25    6.39
   0   3  -8  135.53   10.10
   0   3  -9 1806.08   32.39
   0   3   9 1792.05   22.39
   0   3  -9 1757.26   31.79
   0   3 -10   12.35    8.06
   0   3 -10    8.84    7.16
   0   3  10    5.89    4.20
   0   3 -11   25.59    9.17
   0   3 -11   22.10    9.09
   0   3 -12    3.97    9.22
   0   3 -12    5.19    9.38
   0   3 -13  729.19   28.15
   0   3 -13  773.14   28.33
   0   3 -14  134.31   16.51
   0   3 -14  117.34   16.04
   0   3 -15  921.26   35.47
   0   3 -15  893.39   34.59
   0   3 -16   21.46   15.11
   0   3 -16   24.70   15.90
   0   3 -17  337.03   26.08
   0   4   0 1675.44   11.55
   0   4   0 1742.43   12.42
   0   4  -1 2266.20   11.21
   0   4   1 2249.88   16.34
   0   4   2 1612.34   14.91
   0   4  -3 3779.36   28.48
   0   4   3 3726.75   24.17
   0   4  -3 3795.88   32.02
   0   4  -4   79.13    5.95
   0   4   4   82.40    4.63
   0   4  -4   78.47    6.88
   0   4   5 2913.68   23.98
   0   4  -5 2858.40   32.09
   0   4  -5 2914.50   30.34
   0   4  -6  420.21   13.27
   0   4  -6  383.52   13.46
   0   4   6  451.40   10.31
   0   4   7   39.04    4.33
   0   4  -7   50.30    7.20
   0   4  -7   47.27    7.16
   0   4  -8  543.43   17.60
   0   4  -8  509.18   17.42
   0   4  -9  231.24   13.30
   0   4  -9  224.37   13.35
   0   4   9  265.06    9.73
   0   4 -10   15.07    8.16
   0   4  10   23.76    5.14
   0   4 -10   30.96    8.74
   0   4 -11  891.53   27.08
   0   4 -11  863.00   27.04
   0   4 -12   31.19   10.34
   0   4 -12   16.61   10.66
   0   4 -13  397.96   22.39
   0   4 -13  424.02   22.65
   0   4 -14  701.23   29.58
   0   4 -14  644.96   28.43
   0   4 -15    7.01   12.87
   0   4 -15   20.15   13.49
   0   4 -16  121.66   19.28
   0   4 -16  118.36   18.14
   0   4 -17  429.82   29.07
   0   5   0    1.66    2.07
   0   5   0    0.27    2.22
   0   5   1   22.26    2.85
   0   5  -1   26.08    2.12
   0   5   1   29.75    3.09
   0   5   2 2274.12   19.16
   0   5  -3  779.83   16.36
   0   5   3  875.48   12.85
   0   5   4 7399.09   38.61
   0   5  -4 7343.42   51.43
   0   5   5  180.30    7.01
   0   5  -5  150.49    9.21
   0   5  -5  172.84    8.85
   0   5   6  294.35    9.11
   0   5  -6  285.42   12.53
   0   5   7 3424.38   30.74
   0   5  -7 3435.56   42.22
   0   5  -7 3440.40   39.68
   0   5  -8   16.71    7.48
   0   5   8   20.04    4.60
   0   5  -8   18.95    6.99
   0   5  -9  276.45   14.49
   0   5   9  293.89   10.70
   0   5  -9  267.32   15.02
   0   5  10 1176.91   21.45
   0   5  10 1144.55   20.58
   0   5 -10 1147.04   29.77
   0   5 -10 1200.03   29.48
   0   5  11   78.39    7.22
   0   5 -11   81.49   12.00
   0   5 -11   83.68   11.47
   0   5  11   98.79    7.82
   0   5 -12  974.30   30.55
   0   5 -12  906.60   29.99
   0   5 -13   72.01   13.14
   0   5 -13  103.50   14.68
   0   5 -14  173.94   18.17
   0   5 -14  184.33   18.10
   0   5 -15  244.09   21.56
   0   5 -15  291.77   22.53
   0   5 -16  201.21   22.29
   0   5 -16  214.08   21.97
   0   5 -17   25.11   16.84
   0   6   0  421.79    7.06
   0   6   0  456.22    8.04
   0   6   1  328.56    7.41
   0   6  -1  302.82    5.64
   0   6   1  321.25    7.59
   0   6   1  320.63    7.47
   0   6   2 8304.93   38.16
   0   6   2 8228.82   39.08
   0   6   3  131.39    5.99
   0   6  -4  270.31   11.98
   0   6   4  273.56    8.49
   0   6  -5   13.10    5.02
   0   6  -5   19.69    6.21
   0   6   5    5.13    3.26
   0   6   6 1173.10   18.48
   0   6  -6 1087.55   24.02
   0   6  -6 1127.91   22.16
   0   6  -7   54.54    8.35
   0   6  -7   75.63    8.58
   0   6   7   71.43    5.99
   0   6  -8 2251.62   35.66
   0   6  -8 2297.32   38.21
   0   6   8 2224.02   27.54
   0   6   9    3.57    4.32
   0   6   9   11.05    4.76
   0   6  -9   -1.57    7.76
   0   6  -9    9.80    8.29
   0   6  10  125.53    8.52
   0   6 -10  130.48   12.40
   0   6  10  152.95    9.05
   0   6 -10  119.91   12.53
   0   6 -11   13.68    8.90
   0   6  11   25.44    6.26
   0   6 -11   25.88   10.87
   0   6  11   28.09    6.09
   0   6 -12  292.54   18.99
   0   6 -12  270.15   18.73
   0   6 -13   44.94   13.10
   0   6 -13   55.18   13.74
   0   6 -14 1372.25   40.93
   0   6 -14 1342.59   41.33
   0   6 -15    7.93   14.81
   0   6 -15   10.55   13.35
   0   6 -16  507.38   29.72
   0   6 -16  570.69   31.71
   0   7   0    2.95    2.53
   0   7   0    2.32    2.32
   0   7   1 1500.89   16.51
   0   7   1 1528.21   16.52
   0   7   1 1448.52   15.81
   0   7  -1 1465.85   13.13
   0   7   2 1533.89   17.93
   0   7  -2 1545.82    9.24
   0   7   2 1501.05   18.20
   0   7   3 1101.56   15.87
   0   7   3 1100.53   16.26
   0   7   4 3509.23   30.18
   0   7  -5   45.61    8.17
   0   7   5   36.79    4.60
   0   7  -6  641.35   20.30
   0   7   6  707.10   15.15
   0   7  -7  847.26   21.67
   0   7  -7  924.01   24.80
   0   7   7  942.12   18.30
   0   7   8   96.96    7.14
   0   7   8  108.14    7.57
   0   7  -8   98.05    9.82
   0   7  -8  112.21   11.89
   0   7  -9   74.91    9.84
   0   7   9   68.13    6.77
   0   7  -9   68.12   11.02
   0   7   9   90.02    7.50
   0   7 -10 1196.37   32.50
   0   7  10 1251.98   23.93
   0   7  10 1225.91   23.33
   0   7 -10 1201.15   30.41
   0   7 -11   36.50   10.77
   0   7  11   30.63    6.66
   0   7 -11   28.40   10.98
   0   7  11   22.48    6.21
   0   7 -12  842.43   30.80
   0   7  12  843.54   21.46
   0   7 -13  601.03   28.36
   0   7 -13  619.09   26.97
   0   7 -14  335.04   23.37
   0   7 -14  354.95   24.72
   0   7 -15  130.39   19.41
   0   7 -15  167.14   19.33
   0   7 -16  147.47   21.20
   0   8   0  380.93    7.44
   0   8   0  374.05    8.42
   0   8   1  450.31    9.56
   0   8  -1  407.73    7.72
   0   8   1  425.23    9.58
   0   8  -2 1026.81    9.22
   0   8  -2 1018.36    8.87
   0   8   2 1053.98   16.12
   0   8   2 1101.03   16.24
   0   8   3 3075.86   28.37
   0   8   3 3077.41   28.02
   0   8   4  532.41   12.52
   0   8   4  528.68   12.73
   0   8   5 3527.61   32.50
   0   8   5 3386.21   32.78
   0   8   6  608.59   14.49
   0   8  -6  600.37   20.12
   0   8   6  599.67   14.85
   0   8  -7   36.60    9.47
   0   8   7   47.33    5.59
   0   8   7   46.29    6.03
   0   8   8  250.16   10.84
   0   8   8  236.42   10.77
   0   8  -8  215.90   14.78
   0   8  -9  100.42   12.54
   0   8   9  108.72    8.47
   0   8   9  110.66    8.35
   0   8  10  158.27   10.25
   0   8 -10  192.05   15.05
   0   8 -10  182.80   15.84
   0   8  10  149.61   10.01
   0   8 -11 1881.53   43.84
   0   8 -11 1974.99   42.03
   0   8  11 1932.98   31.42
   0   8  11 1939.73   31.70
   0   8 -12   99.24   15.16
   0   8 -12   76.39   13.63
   0   8  12   83.12    9.13
   0   8 -13  319.91   23.13
   0   8 -14  187.13   19.54
   0   8 -15  -13.44   15.70
   0   8 -16  103.07   21.09
   0   9   0    2.17    2.46
   0   9   0    4.61    2.63
   0   9   1 2448.63   22.28
   0   9   1 2343.05   22.99
   0   9   2   57.23    4.96
   0   9   2   38.19    4.46
   0   9   2   51.67    5.00
   0   9  -2   47.98    2.64
   0   9   3   18.55    4.14
   0   9   3   28.10    4.74
   0   9   4  108.76    6.73
   0   9   4  120.51    7.05
   0   9   5 1059.65   19.39
   0   9   5 1036.07   18.87
   0   9   6    6.43    4.60
   0   9   6    4.28    4.22
   0   9   7 3274.81   35.93
   0   9   7 3427.45   37.35
   0   9  -8   40.82    9.96
   0   9   8   57.72    7.11
   0   9   8   55.28    7.03
   0   9  -9  884.87   29.23
   0   9   9  904.21   21.01
   0   9   9  961.50   21.89
   0   9 -10    0.07   10.23
   0   9  10   -2.42    5.99
   0   9  10    3.79    5.77
   0   9  11  154.47   10.98
   0   9 -11  129.86   16.44
   0   9  12   20.53    7.24
   0   9 -12   31.29   13.51
   0   9  13  502.57   19.26
   0   9 -13  525.17   28.87
   0   9 -14   43.69   16.83
   0   9 -15  766.96   36.56
   0   9 -16   22.01   18.22
   0  10   0  947.23   12.59
   0  10   0  963.97   14.71
   0  10   1   87.60    5.50
   0  10  -1   87.40    4.65
   0  10   1  103.82    5.77
   0  10   2  391.74   10.90
   0  10   2  400.00   10.90
   0  10  -2  378.01    6.75
   0  10   3 2768.34   29.25
   0  10   3 2674.25   28.65
   0  10   4  218.64    9.39
   0  10   4  220.77    9.44
   0  10   5 1590.91   24.68
   0  10   5 1671.36   24.88
   0  10   6  933.02   19.69
   0  10   6  953.56   19.69
   0  10   7   55.04    6.76
   0  10   7   66.69    7.14
   0  10   8  563.85   16.73
   0  10   8  557.10   16.90
   0  10   9  260.13   12.46
   0  10   9  307.72   13.46
   0  10  10  339.64   14.59
   0  10  10  305.21   13.96
   0  10  11 1412.48   29.15
   0  10 -11 1457.70   41.12
   0  10 -12   99.13   16.21
   0  10  12  145.03   11.63
   0  10  13  173.38   13.53
   0  10 -13  198.15   19.79
   0  11   0    0.16    3.04
   0  11   0    4.23    3.36
   0  11   1   59.43    5.23
   0  11   1   58.35    5.11
   0  11  -1   59.05    4.29
   0  11  -2 1884.33   15.46
   0  11   2 1741.78   22.16
   0  11   2 1853.66   23.92
   0  11   3   29.57    5.40
   0  11   3   26.81    5.10
   0  11   4  685.62   16.16
   0  11   4  684.35   16.08
   0  11   5 1529.48   24.61
   0  11   5 1451.15   24.08
   0  11   6 1852.46   28.29
   0  11   6 1740.15   27.25
   0  11   7  808.22   19.90
   0  11   7  771.05   19.35
   0  11   8  406.06   15.20
   0  11   8  432.48   15.51
   0  11   9  722.55   20.49
   0  11  10  895.42   23.35
   0  11  11   70.26    9.37
   0  11  12  917.45   25.93
   0  11  13   34.31    9.78
   0  11  14   75.48   11.59
   0  12   0 5083.11   35.47
   0  12  -1    9.66    3.05
   0  12   1   15.98    4.21
   0  12   1   15.98    4.29
   0  12   2  646.60   15.20
   0  12  -2  674.01    9.86
   0  12   2  652.47   14.25
   0  12   3   71.07    6.57
   0  12   3   73.59    6.72
   0  12   4   61.04    6.68
   0  12   5   31.70    6.13
   0  12   6 1782.96   28.76
   0  12   7  104.40    8.98
   0  12   8 1226.16   25.98
   0  12   9   70.62    8.78
   0  12  10  829.98   23.48
   0  12  11   44.60    9.17
   0  12  12  261.99   15.83
   0  12  13   46.86   10.44
   0  12  14  425.34   20.81
   0  13   0    1.84    3.83
   0  13   1  895.08   15.25
   0  13   1  936.07   17.64
   0  13  -1  915.17   14.64
   0  13  -2 1077.98   12.93
   0  13   2 1112.51   20.30
   0  13   2 1103.44   18.54
   0  13   3   70.43    7.03
   0  13   4 1331.09   24.17
   0  13   5  193.05   10.59
   0  13   6  150.08   10.07
   0  13   7  686.43   19.73
   0  13   8  208.96   12.53
   0  13   9  462.14   18.02
   0  13  10  832.42   24.52
   0  13  11   73.29   10.19
   0  13  12  866.37   26.96
   0  13  13    4.77    8.96
   0  13  14   31.99    9.73
   0  14   0  957.92   17.31
   0  14   1   73.87    6.35
   0  14  -1   71.66    5.14
   0  14   1   77.74    5.98
   0  14   2  105.05    7.08
   0  14   2  101.82    7.79
   0  14  -2   95.66    4.73
   0  14   3 2464.71   32.32
   0  14   4   36.87    6.65
   0  14   5  364.14   14.32
   0  14   6  269.81   13.20
   0  14   7  201.96   12.43
   0  14   8  417.19   17.18
   0  14   9  857.61   24.58
   0  14  10   73.68   10.45
   0  14  11  845.54   26.41
   0  14  12   11.88    8.51
   0  14  13  408.36   20.85
   0  14  14  100.09   13.73
   0  15   0    1.17    4.17
   0  15   1 1581.11   24.20
   0  15  -1 1612.86   20.30
   0  15  -2  120.84    5.30
   0  15   2  106.57    8.11
   0  15   2   92.08    6.99
   0  15   3  203.50   10.90
   0  15   4    7.76    5.45
   0  15   5  379.81   15.34
   0  15   6  237.79   13.05
   0  15   7 1695.11   32.64
   0  15   8   25.60    8.22
   0  15   9 1209.31   30.10
   0  15  10   -1.65    8.52
   0  15  11   -3.35    9.10
   0  15  12   34.00   10.54
   0  15  13  243.94   17.67
   0  15  14    4.16   11.39
   0  16   0  133.92    7.96
   0  16   1  743.95   17.54
   0  16  -1  789.09   14.70
   0  16   2   23.27    5.42
   0  16   2   13.11    5.68
   0  16  -2   14.61    3.29
   0  16   3  757.75   19.55
   0  16   4  150.95   10.47
   0  16   5  860.57   22.72
   0  16   6  966.70   24.94
   0  16   7  103.24   10.84
   0  16   8  857.75   25.38
   0  16   9  573.45   22.02
   0  16  10  204.74   15.02
   0  16  11  247.21   16.84
   0  16  12    4.76    9.98
   0  16  13  395.00   21.52
   0  17   0    1.36    4.54
   0  17   1  123.77    8.68
   0  17  -1  116.68    6.63
   0  17   2  720.00   18.86
   0  17   3   29.20    6.85
   0  17   4 1640.69   30.40
   0  17   5  207.78   12.92
   0  17   6  201.83   13.46
   0  17   7  192.44   13.90
   0  17   8   -0.78    8.60
   0  17   9  175.42   14.41
   0  17  10  601.77   23.97
   0  17  11    1.88   10.09
   0  17  12  395.90   21.57
   0  18   0 1084.36   20.04
   0  18  -1   28.45    4.91
   0  18   1   10.89    5.48
   0  18   2  717.03   19.53
   0  18   3   -4.99    7.29
   0  18   4  136.02   10.85
   0  18   5   26.36    8.19
   0  18   6  724.74   23.27
   0  18   7  129.86   12.46
   0  18   8 1603.20   35.83
   0  18   9    1.45    9.16
   0  18  10   53.43   10.79
   0  18  11   86.56   13.32
   0  18  12   -2.00   10.35
   0  19   0    0.78    4.96
   0  19   1  400.80   14.19
   0  19   2  365.37   14.70
   0  19   3  290.47   14.19
   0  19   4 1025.56   25.80
   0  19   5  174.95   12.86
   0  19   6  241.15   14.49
   0  19   7  350.07   17.80
   0  19   8   24.59    9.04
   0  19   9  136.26   13.87
   0  19  10  502.49   22.98
   0  19  11   58.87   12.57
   0  20   0  500.29   14.35
   0  20   1  472.49   15.56
   0  20   2   86.03    9.65
   0  20   3  320.31   15.27
   0  20   4   12.45    8.33
   0  20   5 1238.24   30.14
   0  20   6   19.56    9.10
   0  20   7   20.99    9.02
   0  20   8   96.18   13.13
   0  20   9  229.47   17.50
   0  20  10    9.32   10.75
   0  21   1 1220.19   24.11
   0  21   2   25.29    7.73
   0  21   3  258.68   14.33
   0  21   4  145.83   12.57
   0  21   5  300.37   16.85
   0  21   6   49.45   10.82
   0  21   7  576.72   23.64
   0  21   8   53.04   11.68
   0  21   9  261.40   19.18
   0  22   2   51.03    8.16
   0  22   3  683.78   21.41
   0  22   4   76.74   10.98
   0  22   5  429.85   19.67
   0  22   6  360.78   19.23
   0  22   7   11.96    9.90
   0  22   8  512.62   24.07
   0  23   2  416.97   16.36
   0  23   3   41.96    9.33
   0  23   4  922.24   26.27
   0  23   5   42.39   10.29
   0  23   6  202.52   15.79
   0  23   7  119.65   14.24
   0  24   3    5.05    8.20
   0  24   4    0.54    9.35
   0  24   5   -6.00    9.19
   0  24   6  573.09   23.58
   0  25   4  348.32   17.56
   1 -25  -2   62.39   13.32
  -1 -25   1  414.76   22.54
   1 -25  -1  388.78   22.16
  -1 -25   0   29.10   11.85
   1 -25   0   32.35   11.68
   1 -25   1  189.76   16.88
  -1 -25  -1  175.06   16.79
  -1 -25  -2  467.16   24.20
   1 -24  -5  564.76   26.69
   1 -24  -4   15.21   11.00
   1 -24  -3  260.09   18.69
   1 -24  -2   28.74   11.56
  -1 -24   2   16.00    9.84
  -1 -24   1   40.29   11.25
   1 -24  -1   37.98   11.87
  -1 -24   0    2.40    9.84
   1 -24   0   -1.70    9.72
  -1 -24  -1  799.93   28.96
   1 -24   1  879.28   29.54
  -1 -24  -2   22.07   11.20
  -1 -24  -3  449.86   23.08
  -1 -24  -4   32.96   11.65
  -1 -24  -5  476.32   24.78
   1 -23  -6   10.57   11.76
   1 -23  -5    2.26   10.71
   1 -23  -4  101.96   14.18
   1 -23  -3  234.01   17.87
   1 -23  -2   65.81   12.14
  -1 -23   2   53.03   10.87
   1 -23  -1 1197.83   33.62
  -1 -23   1 1256.41   33.48
   1 -23   0  241.17   16.61
  -1 -23   0  276.99   17.45
  -1 -23  -1  537.68   23.84
   1 -23   1  586.47   23.85
   1 -23   2   27.26   10.34
  -1 -23  -2   35.14   11.10
  -1 -23  -3   17.09   10.12
  -1 -23  -4  324.38   20.29
  -1 -23  -5  249.17   18.99
  -1 -23  -6   31.73   11.85
   1 -22  -9   50.50   15.67
   1 -22  -8  763.25   31.06
   1 -22  -8  727.70   28.56
   1 -22  -7  100.07   14.43
   1 -22  -7  101.94   16.56
   1 -22  -6  121.05   14.83
   1 -22  -6  116.10   15.19
   1 -22  -5  211.88   16.88
   1 -22  -4   42.61   11.45
   1 -22  -3  341.56   19.38
  -1 -22   2  564.16   22.09
   1 -22  -2  503.56   22.39
   1 -22  -1   60.59   10.98
  -1 -22   1   57.89   11.18
   1 -22   0  380.43   19.32
  -1 -22   0  349.55   18.63
  -1 -22  -1   28.80    9.55
   1 -22   1   60.32   11.27
   1 -22   2   35.83    9.75
  -1 -22  -2   37.52   10.67
  -1 -22  -3  422.28   21.60
  -1 -22  -4  152.09   14.70
  -1 -22  -5   53.62   11.61
  -1 -22  -6  616.22   25.81
  -1 -22  -7   38.03   12.38
  -1 -22  -8  443.58   23.86
   1 -21 -10  285.88   23.32
   1 -21  -9   -9.56   13.81
   1 -21  -9   -2.94   10.44
   1 -21  -8   -9.24   12.98
   1 -21  -8   -0.79   10.72
   1 -21  -7    7.41   12.44
   1 -21  -7    2.62   10.65
   1 -21  -6  752.69   27.40
   1 -21  -6  721.04   27.69
   1 -21  -5   37.99   11.03
   1 -21  -4  569.21   23.57
   1 -21  -3   60.97   10.80
  -1 -21   3   47.46    9.76
   1 -21  -2  430.91   19.85
  -1 -21   2  455.20   19.52
  -1 -21   1  294.85   16.68
   1 -21  -1  264.32   16.32
   1 -21   0  347.38   18.02
  -1 -21   0  347.58   17.62
   1 -21   1   51.94   10.25
  -1 -21  -1   31.62    9.36
  -1 -21  -2  710.15   24.97
   1 -21   2  698.34   23.62
  -1 -21  -3   94.13   11.97
  -1 -21  -4 1086.34   31.08
  -1 -21  -5    4.65    9.83
  -1 -21  -6  131.91   14.58
  -1 -21  -7   11.77   10.25
  -1 -21  -8  253.51   17.90
  -1 -21  -9   11.24   11.92
   1 -20 -11   88.88   18.17
   1 -20 -11  107.34   14.54
   1 -20 -10  641.04   25.91
   1 -20 -10  635.07   25.83
   1 -20 -10  681.18   30.51
   1 -20  -9    4.57   12.82
   1 -20  -9   24.18   10.91
   1 -20  -8  519.24   26.08
   1 -20  -8  548.71   23.82
   1 -20  -7   38.92   11.77
   1 -20  -7    4.02   11.61
   1 -20  -6  456.38   21.79
   1 -20  -6  455.17   22.86
   1 -20  -5  262.67   16.92
   1 -20  -4   15.28    9.07
   1 -20  -3   20.13    9.30
  -1 -20   3   32.86    8.74
  -1 -20   2  886.20   24.96
   1 -20  -2  850.89   25.91
  -1 -20   1   -1.57    7.25
   1 -20  -1    6.72    8.26
  -1 -20   0  813.56   24.71
   1 -20   0  875.57   25.61
  -1 -20  -1  242.74   15.13
   1 -20   1  292.27   15.41
  -1 -20  -2   41.46    9.44
   1 -20   2   59.35    9.45
  -1 -20  -3  240.68   15.89
  -1 -20  -4  128.22   13.18
  -1 -20  -5  117.93   12.67
  -1 -20  -6 1517.11   36.51
  -1 -20  -7   27.09   10.13
  -1 -20  -8  285.36   18.47
  -1 -20  -9   87.17   12.78
  -1 -20 -10  106.27   13.61
  -1 -20 -10  101.09   14.85
  -1 -20 -11   68.29   12.76
   1 -19 -11   48.19   15.90
   1 -19 -11   43.08   11.21
   1 -19 -10   20.22   13.68
   1 -19 -10    0.54   10.06
   1 -19 -10   15.20   10.18
   1 -19  -9  405.58   20.40
   1 -19  -9  389.57   22.93
   1 -19  -8   -3.23   11.77
   1 -19  -8    4.52    9.35
   1 -19  -7  580.14   25.02
   1 -19  -7  545.47   22.96
   1 -19  -6  767.80   26.14
   1 -19  -5   68.67   10.86
   1 -19  -4  290.45   16.07
  -1 -19   3  202.15   12.62
   1 -19  -3  179.64   13.51
   1 -19  -2  621.70   21.87
  -1 -19   2  596.05   19.73
  -1 -19   1  772.04   22.58
   1 -19  -1  798.81   23.80
  -1 -19   0  111.97   11.13
   1 -19   0  109.21   11.21
  -1 -19  -1  570.88   20.23
   1 -19   1  553.62   19.55
  -1 -19  -2  172.75   13.02
   1 -19   2  138.11   11.00
   1 -19   3   68.33    8.89
  -1 -19  -3   77.86   10.19
  -1 -19  -4  273.27   16.01
  -1 -19  -5  351.48   17.32
  -1 -19  -5  360.55   18.10
  -1 -19  -6  130.78   13.35
  -1 -19  -6  100.35   12.39
  -1 -19  -7  736.59   25.55
  -1 -19  -8  299.09   17.84
  -1 -19  -9  149.54   14.21
  -1 -19 -10  117.44   14.68
  -1 -19 -10   90.67   12.89
  -1 -19 -11   73.49   14.34
  -1 -19 -11   41.96   10.65
   1 -18 -12   15.22   14.68
   1 -18 -11  722.17   31.38
   1 -18 -11  739.20   25.41
   1 -18 -11  768.19   27.57
   1 -18 -10   32.08   10.40
   1 -18 -10   33.76   11.16
   1 -18 -10   15.63   12.95
   1 -18  -9   93.16   14.82
   1 -18  -9  102.98   12.78
   1 -18  -8   32.73   12.47
   1 -18  -8   42.71   10.30
   1 -18  -7  388.08   19.02
   1 -18  -7  365.79   20.19
   1 -18  -6   -1.96    8.66
   1 -18  -5  999.26   27.59
   1 -18  -4   43.62    9.11
  -1 -18   3 1686.77   30.24
   1 -18  -3 1576.90   32.73
  -1 -18   2   48.09    8.14
   1 -18  -2   33.24    7.87
  -1 -18   1   81.10    9.25
   1 -18  -1   69.77    9.21
  -1 -18   0   14.44    7.46
   1 -18   0    7.10    6.50
   1 -18   1  187.42   11.76
  -1 -18  -1  195.35   12.60
  -1 -18  -2    3.72    6.55
   1 -18   2    7.09    6.08
  -1 -18  -3 2275.07   38.71
   1 -18   3 2178.14   33.88
  -1 -18  -4   30.24    8.31
  -1 -18  -5  406.11   18.31
  -1 -18  -5  374.69   17.16
  -1 -18  -6  126.97   12.67
  -1 -18  -6  153.88   12.93
  -1 -18  -7   30.49   10.00
  -1 -18  -7   31.21    9.64
  -1 -18  -8    8.25    9.97
  -1 -18  -8   -6.41    8.46
  -1 -18  -9  623.32   25.02
  -1 -18  -9  630.91   23.26
  -1 -18 -10   21.06    9.52
  -1 -18 -10   50.69   11.61
  -1 -18 -10   48.17   12.82
  -1 -18 -11  884.62   31.22
  -1 -18 -11  914.50   27.15
  -1 -18 -12   -0.88   12.39
   1 -17 -12  170.89   19.88
   1 -17 -12  198.45   16.92
   1 -17 -11   38.55   11.17
   1 -17 -11   46.73   15.20
   1 -17 -11   38.85   10.23
   1 -17 -10  135.93   13.19
   1 -17 -10  109.77   15.50
   1 -17 -10  124.78   13.44
   1 -17  -9  598.79   22.19
   1 -17  -9  566.06   25.13
   1 -17  -8   78.09   13.14
   1 -17  -8   73.67   10.85
   1 -17  -7  619.51   22.14
   1 -17  -7  521.21   22.56
   1 -17  -6  248.34   14.88
   1 -17  -5   13.69    7.42
   1 -17  -4  129.15   11.29
  -1 -17   4  119.93    9.18
   1 -17  -3 1114.17   26.62
  -1 -17   3 1039.78   22.96
  -1 -17   2   12.00    5.85
   1 -17  -2   -1.29    6.42
   1 -17  -1 1518.02   29.64
  -1 -17   1 1483.42   28.16
   1 -17   0   43.56    7.47
  -1 -17   0   33.87    7.16
   1 -17   1 1218.45   25.41
  -1 -17  -1 1219.65   26.80
  -1 -17  -2  666.46   20.35
   1 -17   2  670.21   18.88
   1 -17   3    5.00    5.60
  -1 -17  -3   -3.13    6.62
  -1 -17  -4   23.73    7.33
  -1 -17  -5  317.13   15.88
  -1 -17  -5  329.07   15.62
  -1 -17  -6  175.20   13.07
  -1 -17  -6  160.77   13.18
  -1 -17  -7  978.66   26.89
  -1 -17  -7 1010.75   27.22
  -1 -17  -8  280.48   16.73
  -1 -17  -8  280.18   16.17
  -1 -17  -9  147.21   13.08
  -1 -17  -9  114.76   14.06
  -1 -17 -10   91.01   13.76
  -1 -17 -10   92.59   13.54
  -1 -17 -10  104.75   12.43
  -1 -17 -11  161.48   16.81
  -1 -17 -11  197.23   14.27
  -1 -17 -11  152.43   16.20
  -1 -17 -12  157.44   18.11
  -1 -17 -12  203.01   18.37
  -1 -17 -13  502.76   26.83
   1 -16 -13  222.57   21.07
   1 -16 -12   61.54   12.44
   1 -16 -12   64.43   15.38
   1 -16 -11  253.07   16.99
   1 -16 -11  260.66   15.41
   1 -16 -11  243.02   20.25
   1 -16 -10  439.07   19.29
   1 -16 -10  408.62   22.56
   1 -16 -10  416.46   19.31
   1 -16  -9   39.84   12.39
   1 -16  -9   19.73    8.48
   1 -16  -8  330.16   16.49
   1 -16  -8  307.62   18.69
   1 -16  -7   48.73   10.98
   1 -16  -7   50.35    9.24
   1 -16  -6  653.24   21.64
   1 -16  -5  933.03   24.49
  -1 -16   4  507.65   15.19
   1 -16  -4  502.27   17.99
  -1 -16   3  462.91   14.99
   1 -16  -3  477.22   17.48
   1 -16  -2  953.72   23.29
  -1 -16   2  932.67   21.16
  -1 -16   1  174.27   10.41
   1 -16  -1  192.12   11.51
   1 -16   0 1197.32   24.65
  -1 -16   0 1178.69   24.38
  -1 -16  -1  276.35   13.25
   1 -16   1  263.47   12.00
   1 -16   2  553.10   16.25
  -1 -16  -2  609.49   18.92
  -1 -16  -3  339.14   15.05
   1 -16   3  342.86   12.98
  -1 -16  -4  343.98   15.40
  -1 -16  -5  110.03   10.32
  -1 -16  -5  117.91   10.80
  -1 -16  -6  720.38   21.97
  -1 -16  -6  740.60   22.37
  -1 -16  -7   20.73    9.38
  -1 -16  -7   31.17    8.19
  -1 -16  -8  437.28   19.65
  -1 -16  -8  537.03   20.08
  -1 -16  -9  396.09   20.04
  -1 -16  -9  399.14   18.09
  -1 -16 -10   39.10   10.92
  -1 -16 -10   60.11   13.33
  -1 -16 -10   51.04    9.85
  -1 -16 -11  253.47   18.85
  -1 -16 -11  285.63   15.42
  -1 -16 -11  242.62   18.16
  -1 -16 -12  403.63   22.72
  -1 -16 -12  440.16   24.26
  -1 -16 -13  108.72   16.65
  -1 -16 -13  102.42   16.08
   1 -15 -13   21.71   14.99
   1 -15 -12  635.98   29.18
   1 -15 -12  613.66   24.78
   1 -15 -11   -1.56    9.49
   1 -15 -11   -5.57    8.33
   1 -15 -11   -9.30   12.84
   1 -15 -10  298.27   15.93
   1 -15 -10  299.56   20.13
   1 -15 -10  295.96   16.59
   1 -15  -9    7.82    7.43
   1 -15  -9   14.57   11.63
   1 -15  -8    3.44    7.16
   1 -15  -8    9.70   10.21
   1 -15  -7  111.35   12.66
   1 -15  -7   92.82   10.39
   1 -15  -6 1439.90   29.71
   1 -15  -5    0.61    6.11
   1 -15  -4 2619.04   37.93
  -1 -15   4 2653.21   31.77
  -1 -15   3  188.16    9.70
   1 -15  -3  178.88   11.27
   1 -15  -2  499.32   16.63
  -1 -15   2  451.54   14.42
  -1 -15   1   73.03    7.44
   1 -15  -1   73.44    8.10
   1 -15   0   10.12    5.61
  -1 -15   0    9.44    5.48
  -1 -15  -1  227.93   11.49
   1 -15   1  225.32   10.90
   1 -15   2 2965.09   34.51
  -1 -15  -2 2887.42   37.86
   1 -15   3   31.86    5.94
  -1 -15  -3   40.56    7.18
   1 -15   4  674.12   16.27
  -1 -15  -4  684.44   19.89
  -1 -15  -5   79.56    9.17
  -1 -15  -5   65.46    8.74
  -1 -15  -6   82.90    9.95
  -1 -15  -6   83.93    9.24
  -1 -15  -7    7.16    6.70
  -1 -15  -7    2.93    7.78
  -1 -15  -8  517.89   20.45
  -1 -15  -8  524.75   19.02
  -1 -15  -9   39.31   11.06
  -1 -15  -9   81.71   10.05
  -1 -15 -10  907.20   24.34
  -1 -15 -10  887.82   27.86
  -1 -15 -10  897.01   28.67
  -1 -15 -11    8.75    7.87
  -1 -15 -11   21.87   11.32
  -1 -15 -11   20.92   11.68
  -1 -15 -12  539.20   25.81
  -1 -15 -12  592.63   25.81
  -1 -15 -13  123.18   16.27
  -1 -15 -13  127.82   17.00
  -1 -15 -14   24.80   14.42
  -1 -15 -14   11.21   14.62
   1 -14 -14  400.29   26.34
   1 -14 -13   89.29   16.13
   1 -14 -13   51.07   11.43
   1 -14 -12   -0.06    9.70
   1 -14 -12   15.99   13.36
   1 -14 -11  142.07   16.72
   1 -14 -11  133.59   11.13
   1 -14 -11  138.57   13.30
   1 -14 -10  308.39   16.29
   1 -14 -10  337.26   15.59
   1 -14 -10  317.66   19.97
   1 -14  -9    1.88    7.08
   1 -14  -9   11.88   10.24
   1 -14  -9    4.94    7.55
   1 -14  -8 1611.49   30.99
   1 -14  -8 1621.37   35.77
   1 -14  -7   44.10   10.12
   1 -14  -7   59.41    8.82
   1 -14  -6  321.36   14.58
   1 -14  -5  242.76   12.63
  -1 -14   4  112.71    7.30
   1 -14  -4  108.63    9.27
  -1 -14   3  669.02   15.87
   1 -14  -3  656.04   18.32
  -1 -14   2 1319.74   22.45
   1 -14  -2 1363.61   25.22
   1 -14  -1   22.44    5.62
  -1 -14   1   17.85    5.13
  -1 -14   0 1543.62   25.58
   1 -14   0 1615.90   25.66
  -1 -14  -1   11.70    5.37
   1 -14   1   16.73    5.11
  -1 -14  -2  566.30   16.75
   1 -14   2  589.91   15.28
   1 -14   3  812.89   17.02
  -1 -14  -3  745.29   19.14
   1 -14   4  746.72   15.84
  -1 -14  -4  704.63   19.21
  -1 -14  -5   63.18    8.37
  -1 -14  -5   53.32    7.76
  -1 -14  -6  665.28   19.83
  -1 -14  -6  624.68   19.44
  -1 -14  -7   62.25    8.53
  -1 -14  -7   63.07    9.39
  -1 -14  -8 1292.44   29.91
  -1 -14  -8 1335.91   27.89
  -1 -14  -9  111.80   12.65
  -1 -14  -9  134.32   11.09
  -1 -14 -10   23.85    7.77
  -1 -14 -10   18.14    9.62
  -1 -14 -10   43.47   11.91
  -1 -14 -11  383.21   20.72
  -1 -14 -11  361.94   19.75
  -1 -14 -11  390.04   15.93
  -1 -14 -12  293.60   20.34
  -1 -14 -12  282.29   18.79
  -1 -14 -13   -4.87   13.42
  -1 -14 -13    2.38   12.28
  -1 -14 -14  757.91   31.35
  -1 -14 -14  727.94   31.54
   1 -13 -14   91.61   17.05
   1 -13 -13  172.89   18.67
   1 -13 -13  180.11   16.21
   1 -13 -12   92.10   12.59
   1 -13 -12  101.78   16.37
   1 -13 -11  229.00   18.37
   1 -13 -11  212.71   12.35
   1 -13 -11  205.65   14.45
   1 -13 -10  306.23   19.10
   1 -13 -10  304.71   14.39
   1 -13 -10  277.25   15.18
   1 -13  -9  650.16   19.77
   1 -13  -9  680.93   20.82
   1 -13  -9  686.54   24.69
   1 -13  -8  277.95   13.66
   1 -13  -8  268.92   16.25
   1 -13  -7 1500.82   28.54
   1 -13  -7 1482.65   31.45
   1 -13  -6  315.83   13.74
   1 -13  -5   49.78    7.55
  -1 -13   5   36.98    5.02
  -1 -13   4 1498.23   21.41
   1 -13  -4 1637.03   27.71
  -1 -13   3  298.95   10.38
   1 -13  -3  293.78   12.31
  -1 -13   2   35.39    4.88
   1 -13  -2   29.83    5.72
   1 -13  -1 2356.75   30.40
  -1 -13   1 2412.35   28.98
   1 -13   0   26.88    5.21
  -1 -13   0   36.24    5.47
  -1 -13  -1  816.63   18.34
   1 -13   1  815.40   16.96
   1 -13   2  725.11   15.77
  -1 -13  -2  692.69   17.34
   1 -13   3  110.91    6.83
  -1 -13  -3  105.73    8.27
   1 -13   4  845.04   15.72
  -1 -13  -4  829.86   19.92
  -1 -13  -5  858.00   20.22
  -1 -13  -5  852.23   20.67
  -1 -13  -6   14.38    7.20
  -1 -13  -6   10.04    5.39
  -1 -13  -7 1439.21   28.74
  -1 -13  -7 1407.68   26.94
  -1 -13  -8   65.87   10.22
  -1 -13  -8   87.29    8.95
  -1 -13  -9  280.13   15.91
  -1 -13  -9  296.96   13.94
  -1 -13  -9  267.78   15.49
  -1 -13 -10  813.77   21.00
  -1 -13 -10  803.90   26.25
  -1 -13 -11   47.43   11.38
  -1 -13 -11   55.75   11.39
  -1 -13 -11   65.36    8.39
  -1 -13 -12   94.55   13.44
  -1 -13 -12  128.01   15.44
  -1 -13 -13  605.87   27.88
  -1 -13 -13  661.57   27.68
  -1 -13 -14   16.66   14.18
  -1 -13 -14   12.18   12.42
  -1 -13 -15  383.43   25.88
   1 -12 -15    9.25   15.02
   1 -12 -14   16.37   14.02
   1 -12 -14   17.64   11.46
   1 -12 -13  531.81   26.98
   1 -12 -13  605.87   24.11
   1 -12 -12  122.80   13.16
   1 -12 -12  131.63   15.87
   1 -12 -11  622.26   26.09
   1 -12 -11  686.18   23.10
   1 -12 -10   10.01    6.64
   1 -12 -10   10.71    7.24
   1 -12 -10   14.74    9.93
   1 -12  -9  160.24   11.54
   1 -12  -9  145.71   10.33
   1 -12  -9  159.81   13.99
   1 -12  -8   97.40    8.60
   1 -12  -8  125.87   12.36
   1 -12  -7  687.34   21.63
   1 -12  -7  719.60   19.40
   1 -12  -6  286.25   12.67
  -1 -12   5 3610.82   30.05
   1 -12  -5 3635.88   40.24
  -1 -12   4   -0.76    3.31
   1 -12  -4    3.36    5.07
  -1 -12   3 1089.70   17.69
   1 -12  -3 1058.41   21.01
   1 -12  -2  451.75   13.67
  -1 -12   2  445.82   12.00
   1 -12  -1  562.94   14.59
  -1 -12   1  536.14   13.41
  -1 -12   0   29.06    4.91
   1 -12   0   26.65    4.98
  -1 -12  -1 2552.28   30.21
   1 -12   1 2498.72   27.82
  -1 -12  -2  100.50    7.30
   1 -12   2   99.45    6.36
  -1 -12  -3 1181.93   21.94
   1 -12   3 1205.38   18.06
  -1 -12  -4  382.90   13.39
   1 -12   4  389.76   10.21
  -1 -12  -5  964.48   20.99
  -1 -12  -5  977.11   20.73
  -1 -12  -6   20.20    7.10
  -1 -12  -6   17.62    5.91
  -1 -12  -7  179.22   10.34
  -1 -12  -7  178.47   11.55
  -1 -12  -8  227.24   11.59
  -1 -12  -8  222.77   13.68
  -1 -12  -9 1163.33   27.30
  -1 -12  -9 1082.92   23.12
  -1 -12 -10   16.00    8.59
  -1 -12 -10   -0.05    8.53
  -1 -12 -10   -6.43    5.93
  -1 -12 -11 1300.27   33.99
  -1 -12 -11 1378.41   33.11
  -1 -12 -12   47.50   12.42
  -1 -12 -12   39.45   10.52
  -1 -12 -13  144.34   16.27
  -1 -12 -13  163.52   17.47
  -1 -12 -14   11.78   13.13
  -1 -12 -14   -4.63   12.04
  -1 -12 -15   93.40   16.27
  -1 -12 -15   99.42   17.64
   1 -11 -15  318.74   24.59
   1 -11 -14   67.22   16.09
   1 -11 -14  100.63   13.74
   1 -11 -13  255.54   17.14
   1 -11 -13  290.44   21.93
   1 -11 -12  208.06   14.86
   1 -11 -12  156.13   16.02
   1 -11 -11  363.67   20.53
   1 -11 -11  345.45   17.20
   1 -11 -11  330.40   12.74
   1 -11 -10  318.79   13.12
   1 -11 -10  276.57   14.52
   1 -11 -10  288.73   17.66
   1 -11  -9  862.75   25.78
   1 -11  -9  876.83   20.69
   1 -11  -9  931.49   22.67
   1 -11  -8   29.75    8.95
   1 -11  -8   34.78    6.42
   1 -11  -7 1356.17   24.92
   1 -11  -7 1341.36   28.78
   1 -11  -6  257.20   13.30
   1 -11  -6  239.11   11.07
   1 -11  -5  187.19    9.84
  -1 -11   5  161.34    6.54
  -1 -11   4  314.77    9.05
   1 -11  -4  333.44   12.04
  -1 -11   3  863.31   14.93
   1 -11  -3  877.25   18.28
   1 -11  -2  860.40   17.52
  -1 -11   2  855.12   15.25
   1 -11  -1 3449.50   32.97
  -1 -11   1 3662.91   32.01
   1 -11   0  287.99    9.62
  -1 -11   0  320.43   10.40
  -1 -11  -1 2182.59   26.53
   1 -11   1 2041.56   23.83
  -1 -11  -2   11.45    4.18
   1 -11   2   20.67    3.98
  -1 -11  -3   84.04    6.88
   1 -11   3   73.42    5.00
  -1 -11  -4  461.81   13.87
   1 -11   4  510.69   10.67
  -1 -11  -5 1474.55   24.37
  -1 -11  -5 1550.07   25.09
   1 -11   5 1456.12   16.62
  -1 -11  -6   23.54    6.83
  -1 -11  -6   25.88    5.78
  -1 -11  -7  386.23   13.57
  -1 -11  -7  410.50   15.45
  -1 -11  -8  245.39   11.41
  -1 -11  -8  205.30   12.98
  -1 -11  -9  552.23   19.50
  -1 -11  -9  550.82   15.99
  -1 -11  -9  540.85   20.08
  -1 -11 -10  725.28   17.81
  -1 -11 -10  713.01   22.68
  -1 -11 -11  164.28   13.89
  -1 -11 -11  163.64   14.83
  -1 -11 -12  142.74   15.26
  -1 -11 -12  146.06   14.47
  -1 -11 -13  753.06   28.17
  -1 -11 -13  687.20   28.09
  -1 -11 -14   43.78   13.40
  -1 -11 -14   35.29   13.72
  -1 -11 -15  384.98   24.30
  -1 -11 -15  412.50   26.39
   1 -10 -15   32.22   16.08
   1 -10 -15   -9.63   12.07
   1 -10 -14  501.20   23.20
   1 -10 -14  463.08   26.82
   1 -10 -13  571.94   27.36
   1 -10 -13  643.94   24.28
   1 -10 -12    2.00   10.81
   1 -10 -12   -0.35    8.58
   1 -10 -11  151.41   14.75
   1 -10 -11  169.33   13.07
   1 -10 -10  296.85   11.95
   1 -10 -10  269.90   13.84
   1 -10 -10  265.64   16.59
   1 -10  -9  348.86   17.46
   1 -10  -9  366.21   13.27
   1 -10  -9  366.53   14.69
   1 -10  -8 1279.73   23.34
   1 -10  -8 1362.92   24.52
   1 -10  -8 1319.45   29.27
   1 -10  -7  315.43   15.11
   1 -10  -7  266.42   11.40
   1 -10  -6   51.91    6.57
   1 -10  -6   47.19    8.20
  -1 -10   5  461.37    9.62
   1 -10  -5  483.11   14.02
   1 -10  -4   24.35    4.89
  -1 -10   4   40.15    3.95
   1 -10  -3  115.86    7.26
  -1 -10   3  112.98    5.70
  -1 -10   2 4249.06   31.28
   1 -10  -2 4178.07   36.02
  -1 -10   1   17.54    3.70
   1 -10  -1   12.15    3.97
  -1 -10   0 4270.66   33.70
   1 -10   0 4384.08   33.50
  -1 -10  -1  702.72   14.54
   1 -10   1  725.36   13.63
  -1 -10  -2  904.04   17.03
   1 -10   2  859.29   13.87
  -1 -10  -3 1287.49   20.86
   1 -10   3 1249.63   15.82
   1 -10   4   97.07    4.70
  -1 -10  -4   99.22    7.39
  -1 -10  -4  106.44    7.25
   1 -10   5  385.94    7.95
  -1 -10  -5  427.12   13.02
  -1 -10  -5  396.89   13.24
  -1 -10  -6  757.95   18.69
  -1 -10  -6  775.25   17.53
  -1 -10  -7   18.97    5.21
  -1 -10  -7   34.91    7.67
  -1 -10  -8  603.17   15.88
  -1 -10  -8  561.90   18.66
  -1 -10  -8  576.69   17.47
  -1 -10  -9  691.19   16.70
  -1 -10  -9  667.60   20.60
  -1 -10  -9  655.58   21.31
  -1 -10 -10   70.31   11.23
  -1 -10 -10   90.23   10.65
  -1 -10 -10   91.81    7.63
  -1 -10 -11  530.55   21.53
  -1 -10 -11  526.32   22.09
  -1 -10 -12  420.74   21.64
  -1 -10 -12  441.63   21.10
  -1 -10 -13   82.23   14.19
  -1 -10 -13   89.95   13.79
  -1 -10 -14  735.66   29.35
  -1 -10 -14  802.11   31.35
  -1 -10 -15   59.10   15.30
  -1 -10 -15   90.02   15.81
   1  -9 -15   17.31   12.19
   1  -9 -15   32.76   16.26
   1  -9 -14  108.26   17.03
   1  -9 -14  135.61   14.63
   1  -9 -13   17.02    9.79
   1  -9 -13   20.66   12.21
   1  -9 -12 1317.63   36.26
   1  -9 -12 1384.29   31.76
   1  -9 -11   17.28    7.97
   1  -9 -11   20.36   10.82
   1  -9 -10 1064.67   29.38
   1  -9 -10 1122.64   20.24
   1  -9 -10 1058.68   25.13
   1  -9  -9   20.30    8.87
   1  -9  -9    0.61    6.02
   1  -9  -9   10.39    4.92
   1  -9  -8  224.09   10.18
   1  -9  -8  231.73   13.88
   1  -9  -8  255.07   11.42
   1  -9  -7  119.08    7.86
   1  -9  -7  120.52   10.56
   1  -9  -6 1377.80   22.39
  -1  -9   6 1356.56   14.48
   1  -9  -6 1443.78   26.36
  -1  -9   5  163.01    5.54
   1  -9  -5  149.08    8.23
   1  -9  -4 3688.22   34.31
  -1  -9   4 3787.90   25.54
   1  -9  -3    9.21    3.97
  -1  -9   3   16.96    3.10
   1  -9  -2  940.83   16.55
  -1  -9   2  958.82   14.24
  -1  -9   1  118.82    5.91
   1  -9  -1  121.64    6.25
  -1  -9   0 1112.43   16.45
   1  -9   0 1097.50   16.05
   1  -9   1   27.13    3.61
  -1  -9  -1   27.00    4.20
  -1  -9  -2 1265.69   18.93
   1  -9   2 1261.75   15.46
   1  -9   3  587.59   10.04
  -1  -9  -3  605.51   13.86
  -1  -9  -4 3821.73   34.38
   1  -9   4 3972.18   23.43
  -1  -9  -4 3874.97   33.59
  -1  -9  -5  206.48   10.00
   1  -9   5  174.96    4.90
  -1  -9  -5  188.25    8.68
  -1  -9  -6   64.66    6.28
  -1  -9  -6   62.59    7.15
  -1  -9  -7   88.90    6.86
  -1  -9  -7  116.08    9.27
  -1  -9  -8  568.55   14.51
  -1  -9  -8  572.99   18.31
  -1  -9  -8  593.47   17.61
  -1  -9  -9  177.23   12.23
  -1  -9  -9  195.13   11.98
  -1  -9  -9  193.23    8.95
  -1  -9 -10 1939.70   37.01
  -1  -9 -10 2038.26   24.98
  -1  -9 -11   53.08   11.17
  -1  -9 -11   53.21   10.20
  -1  -9 -12  841.96   28.43
  -1  -9 -12  877.91   27.61
  -1  -9 -13   21.08   10.59
  -1  -9 -13   45.96   12.39
  -1  -9 -14   -4.00   10.95
  -1  -9 -14   33.39   13.16
  -1  -9 -15   10.67   12.10
  -1  -9 -15    1.50   13.34
  -1  -9 -16  184.47   19.57
  -1  -9 -16  214.86   22.08
   1  -8 -16  482.97   29.00
   1  -8 -15   -9.53   11.60
   1  -8 -15    7.93   14.20
   1  -8 -14  480.33   25.91
   1  -8 -14  454.54   21.75
   1  -8 -13   26.38   12.13
   1  -8 -13   43.80   11.02
   1  -8 -12   15.14   10.45
   1  -8 -12   16.23    8.85
   1  -8 -11  145.23   11.83
   1  -8 -11  112.64   13.17
   1  -8 -10  715.26   15.08
   1  -8 -10  688.73   20.33
   1  -8 -10  650.24   23.18
   1  -8  -9   37.41    9.15
   1  -8  -9   36.07    6.92
   1  -8  -9   22.49    5.09
   1  -8  -8 2035.48   28.92
   1  -8  -8 2018.38   34.21
   1  -8  -8 2036.61   26.36
   1  -8  -7  803.77   16.65
   1  -8  -7  784.89   21.03
   1  -8  -7  756.39   16.78
   1  -8  -6 1117.94   22.95
   1  -8  -6 1156.18   19.59
  -1  -8   6 1114.55   12.06
   1  -8  -5 1513.90   21.87
  -1  -8   5 1512.68   14.28
  -1  -8   4  203.55    5.75
   1  -8  -4  205.50    8.52
  -1  -8   3  681.77   10.62
   1  -8  -3  667.90   13.80
  -1  -8   2 1576.05   16.69
   1  -8  -2 1693.40   20.70
   1  -8  -1  528.80   11.27
  -1  -8   1  561.04   10.62
   1  -8   0 5044.94   31.79
  -1  -8   0 5002.68   32.40
  -1  -8  -1  823.48   13.94
   1  -8   1  824.48   12.44
  -1  -8  -2   25.13    4.08
   1  -8   2   32.52    3.16
   1  -8   3   93.43    4.03
  -1  -8  -3   92.26    6.02
  -1  -8  -4   48.90    5.53
  -1  -8  -4   52.08    5.12
   1  -8   4   48.61    2.85
  -1  -8  -5  840.82   15.95
   1  -8   5  839.94    8.46
  -1  -8  -5  778.45   16.57
  -1  -8  -6 3639.75   37.40
  -1  -8  -6 3512.40   32.54
  -1  -8  -7   73.06    8.16
  -1  -8  -7   81.28    6.13
  -1  -8  -8  760.06   15.57
  -1  -8  -8  747.17   20.43
  -1  -8  -9  860.80   16.01
  -1  -8  -9  779.09   22.35
  -1  -8  -9  855.22   21.85
  -1  -8 -10   59.78    9.45
  -1  -8 -10   40.19    9.46
  -1  -8 -10   64.59    5.28
  -1  -8 -11   97.44   12.21
  -1  -8 -11   72.75   10.43
  -1  -8 -12  338.91   18.24
  -1  -8 -12  290.41   18.21
  -1  -8 -13  175.17   15.37
  -1  -8 -13  167.96   16.58
  -1  -8 -14 1036.30   35.01
  -1  -8 -14 1030.49   33.17
  -1  -8 -15  200.20   18.23
  -1  -8 -15  127.48   17.95
  -1  -8 -16  216.01   21.79
  -1  -8 -16  223.29   21.17
   1  -7 -16   -2.37   12.66
   1  -7 -16   18.53   16.19
   1  -7 -15  553.87   24.99
   1  -7 -15  600.00   29.82
   1  -7 -14  146.78   14.95
   1  -7 -14  132.81   17.02
   1  -7 -13  125.95   13.17
   1  -7 -13  151.36   16.01
   1  -7 -12  739.70   27.26
   1  -7 -12  703.72   23.09
   1  -7 -11   40.38    8.25
   1  -7 -11   48.27   10.27
   1  -7 -10  102.39    5.99
   1  -7 -10   84.15    8.81
   1  -7 -10  113.05   12.08
   1  -7  -9 3101.91   29.22
   1  -7  -9 3141.38   37.97
   1  -7  -9 3131.15   44.64
   1  -7  -8   53.80    6.89
   1  -7  -8   55.44    8.72
   1  -7  -8   63.74    5.86
   1  -7  -7  564.34   14.41
   1  -7  -7  574.00   13.63
   1  -7  -7  570.57   17.75
   1  -7  -6  404.31   11.31
   1  -7  -6  386.58   13.89
  -1  -7   6  438.19    7.08
  -1  -7   5 1895.65   14.61
   1  -7  -5 1822.14   22.62
   1  -7  -5 1823.34   26.13
  -1  -7   4  646.11    8.95
   1  -7  -4  636.06   13.31
  -1  -7   3 1169.46   12.63
   1  -7  -3 1209.01   17.30
  -1  -7   2  463.36    8.59
   1  -7  -2  459.83   10.42
   1  -7  -1 1548.60   17.65
  -1  -7   1 1598.48   16.27
  -1  -7   0  732.08   11.82
   1  -7   0  687.93   11.28
   1  -7   1  529.44    9.30
  -1  -7  -1  561.50   10.93
  -1  -7  -2 1703.46   19.49
   1  -7   2 1734.12   14.92
  -1  -7  -3    1.48    3.26
   1  -7   3    0.26    1.66
  -1  -7  -4 1354.34   19.04
  -1  -7  -4 1318.87   18.18
   1  -7   4 1297.50    9.88
  -1  -7  -5 2251.29   26.50
  -1  -7  -5 2246.40   24.19
   1  -7   5 2180.17    9.50
  -1  -7  -6  180.85    9.44
  -1  -7  -6  193.53    7.84
  -1  -7  -7 1869.39   28.76
  -1  -7  -7 1925.69   27.49
  -1  -7  -7 1973.27   23.08
  -1  -7  -8  443.84   15.87
  -1  -7  -8  487.88   15.64
  -1  -7  -8  450.99   11.22
  -1  -7  -9  272.63   14.29
  -1  -7  -9  266.26    8.44
  -1  -7  -9  271.29   13.18
  -1  -7 -10  183.78   12.43
  -1  -7 -10  203.30   13.59
  -1  -7 -11   58.00    9.87
  -1  -7 -11   68.50   10.90
  -1  -7 -12  342.71   19.46
  -1  -7 -12  386.47   18.93
  -1  -7 -13  955.27   31.51
  -1  -7 -13  922.56   29.27
  -1  -7 -14    5.55   10.78
  -1  -7 -14   -8.34   12.55
  -1  -7 -15  486.92   26.69
  -1  -7 -15  439.65   24.36
  -1  -7 -16  154.78   20.67
  -1  -7 -16  152.99   18.38
   1  -6 -16    3.96   14.54
   1  -6 -16   23.07   12.60
   1  -6 -15   38.15   14.58
   1  -6 -15   71.79   13.82
   1  -6 -14   -1.45   12.38
   1  -6 -14    4.55    9.72
   1  -6 -13  951.74   31.96
   1  -6 -13  891.47   27.01
   1  -6 -12   37.33   11.48
   1  -6 -12   59.78   10.16
   1  -6 -11  986.91   28.91
   1  -6 -11  949.99   24.38
   1  -6 -10  217.59   14.48
   1  -6 -10  201.73   11.73
   1  -6  -9  114.85    6.03
   1  -6  -9  107.87   10.86
   1  -6  -9  102.76    8.76
   1  -6  -8   50.61    5.02
   1  -6  -8   42.73    6.46
   1  -6  -8   54.35    8.54
   1  -6  -7 1139.93   23.44
   1  -6  -7 1176.97   17.70
   1  -6  -7 1146.54   19.45
   1  -6  -6   31.67    4.69
  -1  -6   6   35.21    2.39
   1  -6  -6   42.40    7.11
   1  -6  -6   34.71    4.33
   1  -6  -5 2997.53   27.29
  -1  -6   5 3075.87   16.77
   1  -6  -5 2942.71   31.95
  -1  -6   4  193.93    4.68
   1  -6  -4  218.61    7.76
   1  -6  -3 5845.11   35.72
  -1  -6   3 5972.20   25.60
   1  -6  -2    8.22    2.96
  -1  -6   2    9.52    2.21
   1  -6  -1   92.69    4.78
  -1  -6   1   83.57    4.11
   1  -6   0 1258.04   13.92
  -1  -6   0 1287.35   14.31
  -1  -6  -1 2109.95   19.26
   1  -6   1 2210.84   16.79
  -1  -6  -2    9.38    2.88
   1  -6   2   14.44    2.08
  -1  -6  -3 7810.90   38.63
   1  -6   3 7883.18   23.85
  -1  -6  -3 7824.61   40.30
  -1  -6  -4  185.13    6.89
   1  -6   4  187.12    2.73
  -1  -6  -4  174.80    7.46
  -1  -6  -5 1714.37   22.79
  -1  -6  -5 1783.51   20.11
  -1  -6  -6  381.88   12.48
  -1  -6  -6  357.77    9.51
  -1  -6  -7   19.47    5.65
  -1  -6  -7    9.28    5.89
  -1  -6  -7   12.51    3.64
  -1  -6  -8   58.52    7.93
  -1  -6  -8   58.42    4.64
  -1  -6  -8   72.03    7.69
  -1  -6  -9 1559.32   28.66
  -1  -6  -9 1525.16   29.82
  -1  -6  -9 1575.34   16.19
  -1  -6 -10  245.56   14.46
  -1  -6 -10  200.91   12.73
  -1  -6 -11  550.14   20.34
  -1  -6 -11  527.35   21.04
  -1  -6 -12   10.98    8.62
  -1  -6 -12   -1.18    9.52
  -1  -6 -13  500.03   24.09
  -1  -6 -13  486.01   22.36
  -1  -6 -14  101.94   14.27
  -1  -6 -14   90.99   15.35
  -1  -6 -15  326.15   21.31
  -1  -6 -15  307.01   22.75
  -1  -6 -16   85.23   15.60
  -1  -6 -16   61.75   16.59
   1  -5 -16    8.81   12.49
   1  -5 -16   -9.89   14.25
   1  -5 -15  669.18   27.29
   1  -5 -15  681.75   30.85
   1  -5 -14   56.40   13.46
   1  -5 -14   34.31   10.59
   1  -5 -13   97.55   14.79
   1  -5 -13  105.57   12.00
   1  -5 -12  431.96   21.21
   1  -5 -12  465.60   18.90
   1  -5 -11   82.87    9.81
   1  -5 -11   96.23   11.91
   1  -5 -10   57.30    7.83
   1  -5 -10   74.37   10.34
   1  -5  -9 2944.49   35.95
   1  -5  -9 3071.47   21.74
   1  -5  -9 3089.93   42.78
   1  -5  -8   10.03    5.40
   1  -5  -8    7.76    3.23
   1  -5  -8   11.41    7.13
   1  -5  -7 1533.35   26.67
  -1  -5   7 1508.93   11.10
   1  -5  -7 1450.79   21.53
   1  -5  -7 1496.04   18.35
  -1  -5   6  283.65    4.68
   1  -5  -6  267.98    8.91
   1  -5  -6  264.18   11.26
   1  -5  -6  267.03    8.34
   1  -5  -5 1065.81   19.23
  -1  -5   5 1087.10    9.05
   1  -5  -5 1037.58   15.27
  -1  -5   4 2545.08   14.50
   1  -5  -4 2491.05   22.83
  -1  -5   3 1507.98   11.74
   1  -5  -3 1581.54   17.68
   1  -5  -2   13.56    3.18
  -1  -5   2   12.78    2.13
  -1  -5   1 1077.05   11.45
   1  -5  -1 1130.19   13.22
   1  -5   0   67.02    3.70
  -1  -5   0   70.07    3.85
   1  -5   1  636.64    8.30
  -1  -5  -1  647.49   10.17
   1  -5   2 1919.28   11.87
  -1  -5  -2 1873.38   17.67
  -1  -5  -3  539.21   10.14
   1  -5   3  551.09    4.81
  -1  -5  -3  567.63   10.55
  -1  -5  -4  707.83   11.68
  -1  -5  -4  689.75   12.96
  -1  -5  -5 2567.40   22.21
  -1  -5  -5 2503.07   26.98
  -1  -5  -6  128.65    7.97
  -1  -5  -6  128.88    5.65
  -1  -5  -6  130.59    7.58
  -1  -5  -7 5315.95   46.26
  -1  -5  -7 5304.99   30.80
  -1  -5  -7 5360.76   44.04
  -1  -5  -8  259.87   12.61
  -1  -5  -8  260.47    6.71
  -1  -5  -8  285.54   12.30
  -1  -5  -9  568.29   17.86
  -1  -5  -9  592.26   19.18
  -1  -5 -10  584.26   20.42
  -1  -5 -10  631.21   19.83
  -1  -5 -11   50.12    9.89
  -1  -5 -11   61.17    9.77
  -1  -5 -12  519.36   21.14
  -1  -5 -12  551.47   22.95
  -1  -5 -13  617.61   24.41
  -1  -5 -13  686.85   26.69
  -1  -5 -14   13.58   10.38
  -1  -5 -14   30.32   13.45
  -1  -5 -15  614.86   27.68
  -1  -5 -15  610.80   29.46
  -1  -5 -16   21.82   13.67
  -1  -5 -16   12.09   14.73
   1  -4 -16  627.30   31.34
   1  -4 -16  624.80   27.69
   1  -4 -15  190.21   19.52
   1  -4 -15  236.89   18.34
   1  -4 -14  783.37   31.02
   1  -4 -14  774.44   27.35
   1  -4 -13  111.93   14.67
   1  -4 -13  128.14   13.34
   1  -4 -12   17.49    9.48
   1  -4 -12   10.64    7.81
   1  -4 -11 1688.39   36.19
   1  -4 -11 1623.70   31.09
   1  -4 -10  721.30   22.93
   1  -4 -10  685.28   19.25
   1  -4  -9   40.36    8.40
   1  -4  -9   49.60    7.54
   1  -4  -8 1441.75   23.14
   1  -4  -8 1471.70   14.73
   1  -4  -8 1465.22   27.71
   1  -4  -7   41.58    5.19
   1  -4  -7   47.41    7.51
   1  -4  -7   44.93    3.86
  -1  -4   7   49.04    2.49
  -1  -4   6 1517.95   10.28
   1  -4  -6 1465.24   23.45
   1  -4  -6 1470.61   16.86
   1  -4  -6 1438.21   19.12
   1  -4  -5  654.84   11.86
   1  -4  -5  636.98   11.33
  -1  -4   5  675.10    6.47
   1  -4  -5  668.25   15.24
   1  -4  -4 2925.92   27.49
  -1  -4   4 2818.94   13.63
   1  -4  -4 2767.06   22.32
  -1  -4   3 2230.82   12.92
   1  -4  -3 2276.74   19.67
  -1  -4   2 1865.35   12.65
   1  -4  -2 1944.94   17.20
  -1  -4   1  182.82    4.63
   1  -4  -1  184.79    5.47
   1  -4   0 6276.23   25.86
  -1  -4   0 6336.29   26.26
  -1  -4  -1  913.39   10.89
   1  -4   1  906.80    8.58
   1  -4   2 1399.51    8.26
  -1  -4  -2 1386.59   14.04
  -1  -4  -2 1403.90   13.07
  -1  -4  -3 1052.98   13.45
  -1  -4  -3 1070.73   12.80
  -1  -4  -4   33.82    3.34
  -1  -4  -4   27.61    4.29
  -1  -4  -5 1184.37   18.31
  -1  -4  -5 1195.67   17.53
  -1  -4  -5 1171.90   13.77
  -1  -4  -6 1682.66   24.03
  -1  -4  -6 1626.35   15.80
  -1  -4  -6 1595.79   22.19
  -1  -4  -7   31.00    2.99
  -1  -4  -7   32.28    5.83
  -1  -4  -7   26.72    6.30
  -1  -4  -8 1174.69   24.10
  -1  -4  -8 1089.95    7.77
  -1  -4  -8 1119.05   22.29
  -1  -4  -9  187.66   11.07
  -1  -4  -9  197.01   12.07
  -1  -4 -10    6.64    6.71
  -1  -4 -10   17.05    7.83
  -1  -4 -11  252.63   14.59
  -1  -4 -11  284.60   16.33
  -1  -4 -12  620.95   22.72
  -1  -4 -12  566.20   23.02
  -1  -4 -13  103.91   12.99
  -1  -4 -13  101.44   14.06
  -1  -4 -14  914.00   30.74
  -1  -4 -14 1002.02   33.97
  -1  -4 -15   73.71   15.07
  -1  -4 -15  102.36   15.43
  -1  -4 -16  165.05   17.84
  -1  -4 -16  204.77   21.07
  -1  -4 -17  112.73   18.65
   1  -3 -17  -21.81   15.76
   1  -3 -16   11.37   14.01
   1  -3 -16   19.63   11.91
   1  -3 -15   -1.88   12.69
   1  -3 -15    9.38   11.23
   1  -3 -14  909.10   32.60
   1  -3 -14  987.70   30.59
   1  -3 -13   -7.16    8.52
   1  -3 -13    3.18   10.65
   1  -3 -12 1906.25   36.11
   1  -3 -12 1916.71   40.80
   1  -3 -11    5.81    8.52
   1  -3 -11   30.04    7.87
   1  -3 -10 1292.59   25.91
   1  -3 -10 1285.04   29.54
   1  -3  -9    9.51    5.51
   1  -3  -9    2.17    7.27
  -1  -3   8   88.75    3.82
   1  -3  -8   93.92    7.67
   1  -3  -8   88.45    8.85
   1  -3  -8   70.42    2.09
   1  -3  -8   84.00    2.20
  -1  -3   7  106.02    3.55
   1  -3  -7  108.17    4.17
   1  -3  -7  109.18    6.92
   1  -3  -7  114.06    8.88
  -1  -3   6 2032.17   12.30
   1  -3  -6 1881.48   26.32
   1  -3  -6 1998.18   17.44
   1  -3  -6 1967.99   22.47
   1  -3  -5    4.92    2.94
   1  -3  -5    2.55    4.39
  -1  -3   5    3.96    1.33
   1  -3  -5    3.03    2.44
   1  -3  -4 2339.83   18.73
   1  -3  -4 2403.48   24.51
   1  -3  -4 2382.85   19.30
  -1  -3   4 2432.81   11.70
   1  -3  -3  210.47    6.07
  -1  -3   3  217.27    3.91
   1  -3  -2 1318.84   13.26
  -1  -3   2 1302.19    9.64
   1  -3  -1  206.37    5.20
  -1  -3   1  203.40    4.26
  -1  -3   0 1016.98    9.63
   1  -3   0 1029.74    9.55
   1  -3   1   53.23    2.20
  -1  -3  -1   56.17    2.50
  -1  -3  -1   53.02    3.05
  -1  -3  -2 7663.36   29.35
  -1  -3  -2 7686.30   28.50
  -1  -3  -3 1837.57   17.29
  -1  -3  -3 1824.62   14.69
  -1  -3  -4 3931.85   22.05
  -1  -3  -4 3819.98   27.76
  -1  -3  -4 3934.72   28.81
  -1  -3  -5  519.84   12.39
  -1  -3  -5  563.23   12.13
  -1  -3  -5  550.32    8.32
  -1  -3  -6  675.95   15.55
  -1  -3  -6  693.42    8.51
  -1  -3  -6  680.76   14.67
  -1  -3  -7  967.09   20.06
  -1  -3  -7  984.74   19.25
  -1  -3  -8 1173.53   23.91
  -1  -3  -8 1227.91   23.14
  -1  -3  -9  371.63   15.53
  -1  -3  -9  385.35   14.80
  -1  -3 -10 1887.79   33.08
  -1  -3 -10 1980.02   35.56
  -1  -3 -11  288.29   16.32
  -1  -3 -11  303.33   15.45
  -1  -3 -12 1039.79   28.22
  -1  -3 -12 1061.74   30.38
  -1  -3 -13    0.35    9.50
  -1  -3 -13   10.50   10.55
  -1  -3 -14   26.92   11.90
  -1  -3 -14   43.06   12.22
  -1  -3 -15   -4.00   11.53
  -1  -3 -15   -8.47   13.43
  -1  -3 -16  466.69   26.38
  -1  -3 -16  460.27   27.20
  -1  -3 -17  -20.01   15.83
   1  -2 -17   73.55   16.33
   1  -2 -16  727.52   33.20
   1  -2 -16  682.51   29.49
   1  -2 -15   38.70   12.68
   1  -2 -15   30.86   13.34
   1  -2 -14  315.74   20.88
   1  -2 -14  258.38   17.55
   1  -2 -13  494.98   21.48
   1  -2 -13  476.44   23.42
   1  -2 -12   28.83   10.37
   1  -2 -12   13.84    8.04
   1  -2 -11   57.63   10.32
   1  -2 -11   67.51    9.47
   1  -2 -10  997.60   23.15
   1  -2 -10  932.38   25.10
   1  -2  -9  361.04   15.81
   1  -2  -9  391.70   14.06
   1  -2  -8 1725.25   25.62
  -1  -2   8 1763.85   15.56
   1  -2  -8 1708.29   28.97
   1  -2  -7  243.09    9.58
   1  -2  -7  260.49   11.49
  -1  -2   7  254.27    5.56
  -1  -2   6  333.96    5.66
   1  -2  -6  354.91   11.97
   1  -2  -6  364.38    6.22
   1  -2  -6  345.10    9.81
   1  -2  -5  976.08   14.17
  -1  -2   5  969.14    8.46
   1  -2  -5  938.98   16.84
   1  -2  -5  977.80   11.02
   1  -2  -4   48.81    3.65
  -1  -2   4   51.25    2.14
   1  -2  -4   53.86    5.08
   1  -2  -4   53.67    3.40
   1  -2  -3  917.92   10.76
  -1  -2   3  891.66    7.18
   1  -2  -3  862.62    9.72
   1  -2  -3  894.11   13.01
   1  -2  -2 9121.86   31.76
  -1  -2   2 9262.51   23.80
   1  -2  -1   40.37    2.61
   1  -2  -1   40.65    2.71
  -1  -2   1   37.93    2.20
  -1  -2   0 3244.35   15.37
   1  -2   0 3249.45   15.29
  -1  -2  -1 1236.88   10.01
  -1  -2  -1 1255.77    8.07
   1  -2   1 1238.80    7.53
  -1  -2  -2 2214.73   15.03
  -1  -2  -2 2172.84   13.77
  -1  -2  -3 1965.62   17.55
  -1  -2  -3 1967.13   13.33
  -1  -2  -3 2035.93   17.26
  -1  -2  -4 3601.78   27.49
  -1  -2  -4 3612.56   17.67
  -1  -2  -4 3599.94   26.21
  -1  -2  -5  115.82    3.14
  -1  -2  -5   99.79    6.27
  -1  -2  -5  121.10    6.47
  -1  -2  -6 2430.64   28.32
  -1  -2  -6 2433.71   27.40
  -1  -2  -7  138.02    9.05
  -1  -2  -7  143.92    8.48
   1  -2   7  141.57    2.84
  -1  -2  -8 1933.99   30.44
  -1  -2  -8 1922.85   28.69
  -1  -2  -9  183.65   11.13
  -1  -2  -9  169.46   11.50
  -1  -2 -10  255.32   13.41
  -1  -2 -10  292.73   15.05
  -1  -2 -11  586.90   21.70
  -1  -2 -11  638.58   21.42
  -1  -2 -12  586.10   21.84
  -1  -2 -12  555.51   22.91
  -1  -2 -13   33.93   10.87
  -1  -2 -13   22.25   11.14
  -1  -2 -14  458.74   24.52
  -1  -2 -14  462.26   23.25
  -1  -2 -15   38.99   14.34
  -1  -2 -15   52.99   13.40
  -1  -2 -16  327.30   22.66
  -1  -2 -16  339.01   24.77
  -1  -2 -17  288.09   24.11
   1  -1 -17  295.26   22.66
   1  -1 -16   10.96   12.82
   1  -1 -16    2.65   14.02
   1  -1 -15  553.47   28.61
   1  -1 -15  630.44   27.27
   1  -1 -14  313.49   19.14
   1  -1 -14  294.64   20.47
   1  -1 -13  136.14   14.50
   1  -1 -13  124.90   13.84
   1  -1 -12  552.58   21.04
   1  -1 -12  552.98   22.91
   1  -1 -11  802.11   22.94
   1  -1 -11  806.82   25.19
   1  -1 -10  935.23   22.68
   1  -1 -10  905.84   24.83
   1  -1  -9 1005.84   21.81
   1  -1  -9 1001.79   24.13
  -1  -1   8   53.56    3.75
   1  -1  -8   61.81    6.65
   1  -1  -8   66.88    7.98
   1  -1  -7 5535.36   46.99
  -1  -1   7 5444.62   26.88
   1  -1  -7 5589.04   41.91
  -1  -1   6  728.45    8.96
  -1  -1   6  743.88    8.95
   1  -1  -6  748.53   14.27
   1  -1  -6  753.75   16.36
  -1  -1   5   12.91    1.93
   1  -1  -5   24.92    3.84
   1  -1  -5   13.93    1.61
   1  -1  -5   17.49    4.60
   1  -1  -4  643.73   12.38
   1  -1  -4  633.33   10.25
  -1  -1   4  648.31    7.05
   1  -1  -4  647.59    7.68
   1  -1  -3   38.03    2.70
  -1  -1   3   31.18    1.96
   1  -1  -3   27.66    3.98
   1  -1  -3   28.89    2.83
  -1  -1   2  104.27    2.84
   1  -1  -2  111.24    3.69
   1  -1  -2  106.20    3.01
  -1  -1   1 5176.06   17.94
   1  -1  -1 5300.20   17.97
   1  -1  -1 5182.54   20.18
   1  -1   0  152.25    3.32
  -1  -1   0  158.03    3.25
  -1  -1  -1 2129.72   10.64
   1  -1   1 2108.07    9.64
  -1  -1  -1 2082.43   11.18
  -1  -1  -2 1455.22   12.15
  -1  -1  -2 1412.64    9.17
  -1  -1  -2 1405.63   12.24
  -1  -1  -3  999.56    7.38
  -1  -1  -3 1003.63    7.54
  -1  -1  -3  977.59   12.28
  -1  -1  -3  940.61   12.40
  -1  -1  -4  286.31    8.13
  -1  -1  -4  282.80    8.38
  -1  -1  -5 3497.92   29.55
   1  -1   5 3474.27   11.84
  -1  -1  -5 3417.39   30.50
  -1  -1  -6  156.12    8.46
  -1  -1  -6  153.13    7.84
   1  -1   6  151.32    3.30
  -1  -1  -7 3294.41   34.73
  -1  -1  -7 3410.35   36.89
   1  -1   7 3364.26   17.21
   1  -1   8  139.76    4.49
  -1  -1  -8  160.05   10.45
  -1  -1  -8  148.93    9.45
  -1  -1  -9 1453.51   27.37
  -1  -1  -9 1539.68   29.30
  -1  -1 -10  801.34   22.30
  -1  -1 -10  900.79   24.74
  -1  -1 -11   11.81    8.25
  -1  -1 -11   18.38    7.32
  -1  -1 -12   64.85   11.68
  -1  -1 -12   71.66   10.49
  -1  -1 -13  407.03   22.05
  -1  -1 -13  402.90   20.78
  -1  -1 -14   25.64   11.88
  -1  -1 -14   45.57   12.11
  -1  -1 -15  442.39   24.49
  -1  -1 -15  439.36   25.17
  -1  -1 -16  161.42   17.97
  -1  -1 -16  223.51   22.23
  -1  -1 -17   31.11   15.86
   1   0 -17  137.58   18.71
   1   0 -17  153.81   20.71
   1   0 -16    7.85   14.20
   1   0 -16    9.13   12.48
   1   0 -15   59.55   12.95
   1   0 -15   58.27   14.99
   1   0 -14   16.71   10.75
   1   0 -14   19.79   12.51
   1   0 -13  998.65   31.58
   1   0 -13 1061.03   30.29
   1   0 -12    9.40    8.16
   1   0 -12    4.98    9.07
   1   0 -11 2312.64   38.14
   1   0 -11 2280.55   40.79
   1   0 -10   76.41   10.07
   1   0 -10   79.36    9.09
   1   0  -9  166.65   11.36
   1   0  -9  146.96    9.91
  -1   0   9  147.25    6.19
  -1   0   8    3.78    2.70
   1   0  -8    5.89    5.41
   1   0  -8   -3.83    6.04
  -1   0   7  281.61    6.89
   1   0  -7  274.89   11.71
   1   0  -7  265.54   10.08
  -1   0   7  287.21    6.95
  -1   0   6    5.42    2.18
   1   0  -6    6.55    4.73
  -1   0   6    4.92    2.19
   1   0  -6   10.72    3.90
  -1   0   5 5854.74   25.21
   1   0  -5 5933.30   39.65
  -1   0   5 5867.90   24.94
   1   0  -5 5822.27   35.64
  -1   0   4    1.16    1.73
   1   0  -4    1.83    2.94
   1   0  -4    4.04    3.78
   1   0  -4    0.52    0.99
   1   0  -3  477.53    7.90
  -1   0   3  486.14    6.33
   1   0  -3  477.30    5.40
   1   0  -3  454.90    5.17
   1   0  -3  453.98    9.06
   1   0  -2    1.67    2.46
   1   0  -2    1.26    1.62
   1   0  -2    2.21    1.83
  -1   0   2    2.39    1.55
  -1   0   1  136.15    3.25
   1   0  -1  139.95    3.33
   1   0   0   16.15    1.58
  -1   0   0   13.21    1.34
   1   0   1 3130.70   13.06
  -1   0  -1 3220.38   11.54
  -1   0  -1 3245.17   14.16
  -1   0  -1 3219.35   15.32
  -1   0  -2   20.80    2.92
   1   0   2   21.94    1.65
  -1   0  -2   16.66    2.55
  -1   0  -3 7772.97   35.69
   1   0   3 7878.03   20.58
  -1   0  -3 7907.24   34.90
   1   0   4    4.56    1.36
  -1   0  -4    8.12    3.47
  -1   0  -5 2843.48   27.18
   1   0   5 2765.60   14.80
  -1   0  -5 2816.16   27.92
  -1   0  -6    8.95    4.89
  -1   0  -6    2.77    4.26
   1   0   6    1.54    1.74
  -1   0  -7    4.93    4.79
  -1   0  -7   13.10    5.92
   1   0   7   11.78    2.24
  -1   0  -8    1.29    5.86
   1   0   8    8.29    2.50
  -1   0  -8   10.01    5.27
  -1   0  -9 1009.41   24.43
  -1   0  -9 1018.95   23.28
  -1   0 -10   19.35    8.54
  -1   0 -10   23.61    7.55
  -1   0 -11 3149.78   48.16
  -1   0 -11 3252.73   46.90
  -1   0 -12   14.68    9.85
  -1   0 -12   16.63    9.06
  -1   0 -13   36.00   10.63
  -1   0 -13   26.95   11.11
  -1   0 -14   63.04   13.96
  -1   0 -14   61.10   12.65
  -1   0 -15   91.73   15.84
  -1   0 -15   96.63   15.87
  -1   0 -16   -9.64   13.69
  -1   0 -16   -2.03   14.45
  -1   0 -17  883.53   37.18
   1   1 -17  302.37   23.85
   1   1 -17  291.46   26.13
   1   1 -16   -1.92   13.19
   1   1 -16   -2.00   13.49
   1   1 -15  670.08   30.28
   1   1 -15  585.70   26.91
   1   1 -14  288.07   20.28
   1   1 -14  261.32   18.48
   1   1 -13  121.21   13.34
   1   1 -13  143.27   14.87
   1   1 -12  579.47   21.93
   1   1 -12  518.91   22.26
   1   1 -11  793.30   23.56
   1   1 -11  818.50   25.13
   1   1 -10  909.26   24.61
   1   1 -10  957.09   23.67
   1   1  -9  970.63   23.60
   1   1  -9  955.44   22.09
  -1   1   9  960.19   15.12
  -1   1   8   68.21    4.54
   1   1  -8   49.56    6.75
   1   1  -8   59.51    7.88
  -1   1   8   53.03    4.40
  -1   1   7 5711.75   31.82
  -1   1   7 5720.11   31.86
   1   1  -7 5718.38   47.33
   1   1  -7 5601.17   44.84
   1   1  -6  715.49   15.06
  -1   1   6  772.73   11.19
   1   1  -6  723.77   15.89
  -1   1   6  741.24   10.85
   1   1  -5    9.50    3.79
  -1   1   5   15.96    2.62
  -1   1   5   14.88    2.50
   1   1  -5   13.98    4.41
  -1   1   4  653.93    8.70
   1   1  -4  667.33   11.68
   1   1  -4  654.38   12.10
   1   1  -3   32.28    3.85
  -1   1   3   28.09    2.51
   1   1  -3   31.02    3.63
   1   1  -2  118.25    2.56
   1   1  -2  113.63    2.51
  -1   1   2  112.61    3.51
   1   1  -2  110.11    3.99
   1   1  -2  113.41    4.18
   1   1  -1 5120.45   16.00
  -1   1   1 5111.22   18.88
   1   1  -1 5129.42   16.68
  -1   1   0  154.29    3.29
   1   1   0  160.81    3.33
  -1   1  -1 2102.43   12.64
   1   1   1 1990.67   11.39
  -1   1  -2 1457.55   14.27
  -1   1  -2 1466.99   13.45
   1   1   2 1420.53   10.11
   1   1   3  991.97    9.01
  -1   1  -3  970.02   13.52
  -1   1  -3  969.13   13.06
  -1   1  -4  270.02    8.33
  -1   1  -4  283.62    8.85
   1   1   4  290.74    5.40
   1   1   5 3465.42   19.45
  -1   1  -5 3456.19   30.52
  -1   1  -5 3421.40   31.44
  -1   1  -6  150.14    8.48
   1   1   6  141.31    4.71
  -1   1  -6  137.18    7.85
   1   1   7 3351.30   22.61
  -1   1  -7 3333.36   37.30
  -1   1  -7 3304.75   35.74
   1   1   8  152.49    5.80
  -1   1  -8  159.07   10.77
  -1   1  -8  137.96    9.60
   1   1   9 1480.89   17.77
  -1   1  -9 1489.58   29.44
  -1   1  -9 1441.42   28.11
  -1   1 -10  913.11   25.29
  -1   1 -10  960.30   24.93
  -1   1 -11   18.94    9.10
  -1   1 -11   20.51    8.42
  -1   1 -12   84.55   12.57
  -1   1 -12   61.24   11.14
  -1   1 -13  390.04   20.85
  -1   1 -13  401.58   21.55
  -1   1 -14   35.95   12.05
  -1   1 -14   44.92   13.86
  -1   1 -15  436.79   25.01
  -1   1 -15  471.73   26.31
  -1   1 -16  175.69   20.09
  -1   1 -16  167.17   20.67
  -1   1 -17   29.99   15.98
   1   2 -17   86.95   17.77
   1   2 -16  739.26   34.17
   1   2 -16  692.43   31.43
   1   2 -15    5.72   12.04
   1   2 -15   27.31   14.24
   1   2 -14  314.73   20.43
   1   2 -14  361.00   21.95
   1   2 -13  438.15   22.22
   1   2 -13  447.61   21.68
   1   2 -12   11.97    9.07
   1   2 -12   14.55    9.16
   1   2 -11   50.55    9.45
   1   2 -11   51.33    9.84
   1   2 -10 1001.32   25.88
   1   2 -10  991.34   24.92
  -1   2  10  926.77   16.75
   1   2  -9  352.95   14.47
   1   2  -9  335.14   14.86
  -1   2   9  361.30   10.08
   1   2  -8 1783.59   29.17
  -1   2   8 1721.70   19.95
   1   2  -8 1853.59   29.00
  -1   2   8 1763.80   20.16
  -1   2   7  244.32    7.47
   1   2  -7  241.85   10.47
   1   2  -7  269.39   11.42
  -1   2   7  253.54    7.68
   1   2  -6  356.36   11.62
  -1   2   6  345.83    8.21
  -1   2   6  324.54    7.90
   1   2  -6  350.20   11.29
  -1   2   5  976.12   12.50
  -1   2   5  989.02   12.52
   1   2  -5  941.99   16.23
   1   2  -5  963.92   16.46
   1   2  -4   48.76    4.50
   1   2  -4   50.62    4.79
  -1   2   4   52.73    3.42
  -1   2   3  886.83   10.47
   1   2  -3  898.39   13.22
   1   2  -3  904.11   12.14
  -1   2   2 9180.49   30.62
   1   2  -2 9201.64   17.74
   1   2  -2 9058.44   36.71
   1   2  -2 9130.94   30.45
   1   2  -1   41.50    2.00
   1   2  -1   41.38    2.08
  -1   2   1   32.65    2.34
  -1   2   1   44.01    2.66
   1   2   0 3356.18   15.54
  -1   2   0 3321.45   14.94
   1   2   1 1245.72   10.22
  -1   2  -1 1250.33   11.84
  -1   2  -2 2266.90   18.31
   1   2   2 2192.60   14.40
  -1   2  -3 1988.35   19.88
   1   2   3 1932.91   14.42
  -1   2  -3 1928.82   20.04
  -1   2  -4 3621.69   29.76
  -1   2  -4 3697.41   30.49
   1   2   4 3531.64   20.73
  -1   2  -5  119.92    7.32
  -1   2  -5  110.83    6.94
   1   2   5  118.18    4.54
   1   2   6 2453.40   19.83
  -1   2  -6 2574.27   30.47
  -1   2  -6 2473.11   29.66
   1   2   7  132.32    5.48
  -1   2  -7  123.64    8.98
  -1   2  -7  118.54    8.66
  -1   2  -8 1924.67   30.76
  -1   2  -8 1877.80   30.85
   1   2   8 1957.89   20.39
  -1   2  -9  152.47   11.23
   1   2   9  161.86    6.99
  -1   2  -9  176.51   12.10
  -1   2 -10  257.23   14.53
  -1   2 -10  279.06   15.31
  -1   2 -11  620.02   22.77
  -1   2 -11  574.26   21.54
  -1   2 -12  554.98   23.43
  -1   2 -12  534.34   22.34
  -1   2 -13   44.78   12.13
  -1   2 -13   22.31   11.18
  -1   2 -14  465.31   24.65
  -1   2 -14  471.51   25.24
  -1   2 -15   51.75   15.37
  -1   2 -15   53.13   14.27
  -1   2 -16  333.48   25.53
  -1   2 -16  288.51   23.52
  -1   2 -17  262.15   24.46
   1   3 -17    6.12   14.63
   1   3 -16   27.12   14.76
   1   3 -16   14.66   13.77
   1   3 -15   -1.36   13.19
   1   3 -15   19.87   13.96
   1   3 -14  930.49   32.88
   1   3 -14 1020.15   33.82
   1   3 -13    6.25   10.92
   1   3 -13    9.55   10.61
   1   3 -12 1871.25   39.97
   1   3 -12 1838.94   39.19
   1   3 -11   20.76    8.70
   1   3 -11   13.21    8.76
  -1   3  10 1281.36   20.54
   1   3 -10 1344.93   29.93
   1   3 -10 1332.96   29.52
  -1   3   9    4.67    3.57
   1   3  -9    6.65    6.80
   1   3  -9    1.74    6.67
   1   3  -8   93.86    9.05
  -1   3   8   99.09    5.81
   1   3  -8   89.75    8.63
  -1   3   8  107.91    6.16
  -1   3   7  108.98    5.74
   1   3  -7  114.85    8.41
   1   3  -7  114.01    8.48
  -1   3   7  110.26    5.82
   1   3  -6 1912.66   25.50
  -1   3   6 2052.18   20.43
  -1   3   6 2011.38   20.17
   1   3  -6 2015.97   27.31
   1   3  -5    4.89    4.37
  -1   3   5    2.04    2.58
   1   3  -5   -0.78    4.00
  -1   3   5    1.30    2.53
  -1   3   4 2399.00   19.61
   1   3  -4 2302.45   24.99
   1   3  -4 2389.80   22.86
   1   3  -3  193.31    6.30
   1   3  -3  211.97    8.02
  -1   3   3  214.73    5.94
  -1   3   2 1275.15   12.85
   1   3  -2 1299.23    7.04
   1   3  -2 1262.89   12.16
  -1   3   1  213.61    5.18
  -1   3   1  193.95    4.64
   1   3  -1  209.86    4.13
  -1   3   0 1055.22    9.41
   1   3   0 1045.21    9.85
   1   3   1   50.08    3.09
  -1   3  -1   53.36    1.94
  -1   3  -1   53.67    4.29
  -1   3  -1   53.49    1.88
   1   3   2 7658.16   30.16
  -1   3  -2 7894.30   38.17
  -1   3  -3 1875.99   20.99
  -1   3  -3 1908.72   20.96
   1   3   3 1860.58   15.77
   1   3   4 3907.73   24.11
  -1   3  -4 3855.51   32.63
  -1   3  -4 3914.30   32.56
  -1   3  -5  509.85   13.44
   1   3   5  549.12    9.78
  -1   3  -5  582.88   14.31
  -1   3  -6  655.68   16.52
   1   3   6  673.84   11.52
  -1   3  -6  646.31   16.16
  -1   3  -7  939.85   20.79
   1   3   7  993.14   14.81
  -1   3  -7 1007.34   21.72
  -1   3  -8 1198.57   25.42
  -1   3  -8 1145.83   24.50
   1   3   8 1184.96   17.05
  -1   3  -9  368.36   16.17
   1   3   9  395.01   10.87
  -1   3  -9  384.82   16.32
  -1   3 -10 1969.61   36.82
   1   3  10 1923.87   24.59
  -1   3 -10 1872.47   35.49
  -1   3 -11  309.59   17.00
  -1   3 -11  305.73   17.33
  -1   3 -12  980.04   30.42
  -1   3 -12  984.97   29.79
  -1   3 -13    6.39   10.77
  -1   3 -13    9.41   10.52
  -1   3 -14   46.72   13.78
  -1   3 -14   73.28   15.00
  -1   3 -15    3.10   12.00
  -1   3 -15    8.18   14.06
  -1   3 -16  427.99   27.87
  -1   3 -16  430.19   27.23
  -1   3 -17   34.95   16.76
   1   4 -17   35.79   16.74
   1   4 -16  557.31   30.54
   1   4 -16  505.69   29.66
   1   4 -15  223.02   20.29
   1   4 -15  189.60   18.57
   1   4 -14  841.70   31.71
   1   4 -14  781.98   31.18
   1   4 -13  115.67   14.26
   1   4 -13  130.36   15.29
   1   4 -12   20.38   10.50
   1   4 -12   17.87    9.35
  -1   4  11 1529.59   24.96
   1   4 -11 1518.11   34.76
   1   4 -10  676.59   22.15
   1   4 -10  671.53   22.56
  -1   4  10  715.71   16.33
  -1   4   9   45.46    5.41
   1   4  -9   34.53    7.99
   1   4  -9   45.98    8.53
   1   4  -8 1420.09   26.80
   1   4  -8 1312.36   27.02
  -1   4   8 1446.27   20.27
  -1   4   8 1422.98   20.23
   1   4  -7   44.82    6.78
  -1   4   7   49.73    4.90
  -1   4   7   48.76    4.70
   1   4  -7   49.68    7.57
   1   4  -6 1407.77   24.58
  -1   4   6 1429.20   18.14
   1   4  -6 1440.19   22.79
  -1   4   6 1460.42   18.44
   1   4  -5  650.03   15.77
   1   4  -5  661.76   14.37
  -1   4   5  654.22   11.76
  -1   4   5  680.40   12.06
   1   4  -4 2848.56   25.65
  -1   4   4 2798.85   22.69
   1   4  -4 2832.14   29.85
  -1   4   3 2194.97   19.21
   1   4  -3 2141.42   19.91
   1   4  -2 1904.25   16.40
   1   4  -2 1924.55    9.71
  -1   4   2 1903.33   16.79
  -1   4   1  188.62    5.05
  -1   4   1  194.01    5.49
   1   4  -1  185.01    4.40
   1   4   0 6270.42   25.96
  -1   4   0 6234.94   24.81
  -1   4  -1  948.46    7.85
   1   4   1  929.35   11.11
   1   4   2 1398.92   14.30
  -1   4  -2 1424.06   18.55
   1   4   3 1023.08   12.94
  -1   4  -3 1077.36   17.38
  -1   4  -4   29.01    5.29
   1   4   4   37.72    3.56
  -1   4  -4   29.39    5.00
   1   4   5 1201.19   15.54
  -1   4  -5 1193.54   21.21
  -1   4  -5 1179.45   20.76
   1   4   6 1650.83   19.14
  -1   4  -6 1633.31   26.07
  -1   4  -6 1578.22   25.97
  -1   4  -7   27.38    6.90
  -1   4  -7   26.91    6.48
   1   4   7   36.42    4.29
  -1   4  -8 1139.27   25.65
  -1   4  -8 1054.32   24.50
   1   4   8 1120.18   17.74
   1   4   9  200.39    8.68
  -1   4  -9  199.03   12.94
  -1   4  -9  207.97   13.10
  -1   4 -10   13.42    8.30
   1   4  10   14.71    4.77
  -1   4 -10    7.66    8.01
  -1   4 -11  287.68   17.15
  -1   4 -11  305.25   17.43
  -1   4 -12  563.97   24.21
  -1   4 -12  585.46   24.31
  -1   4 -13  115.29   15.23
  -1   4 -13   95.25   14.34
  -1   4 -14  989.67   35.08
  -1   4 -14  942.48   33.85
  -1   4 -15  109.90   17.22
  -1   4 -15   77.17   16.01
  -1   4 -16  166.10   21.41
  -1   4 -16  156.97   19.80
   1   5 -17  222.86   24.18
   1   5 -16   21.28   15.28
   1   5 -16  -11.78   15.67
   1   5 -15  619.57   29.97
   1   5 -15  674.12   31.52
   1   5 -14   30.70   12.62
   1   5 -14   30.91   13.07
   1   5 -13   96.17   14.05
   1   5 -13   75.83   13.73
   1   5 -12  484.42   22.70
   1   5 -12  470.27   21.86
   1   5 -11  104.70   12.98
   1   5 -11   79.27   11.21
  -1   5  11   88.92    7.79
   1   5 -10   62.92    9.53
   1   5 -10   67.72   10.38
  -1   5  10   62.99    6.32
  -1   5   9 2966.75   32.09
   1   5  -9 2933.71   41.47
   1   5  -9 3100.44   44.81
  -1   5   8   13.66    4.45
   1   5  -8   14.74    7.14
   1   5  -8    9.16    6.52
   1   5  -7 1511.73   28.29
  -1   5   7 1507.75   20.59
   1   5  -7 1493.65   25.67
  -1   5   7 1440.89   20.30
  -1   5   6  288.87    9.15
   1   5  -6  255.93   12.22
   1   5  -6  281.19   10.94
  -1   5   6  270.80    8.80
   1   5  -5 1050.34   18.23
   1   5  -5 1037.34   21.08
  -1   5   5 1105.45   16.09
   1   5  -4 2423.28   29.50
   1   5  -4 2518.55   25.40
  -1   5   4 2496.32   22.88
   1   5  -3 1547.54   17.99
  -1   5   3 1510.28   17.12
   1   5  -2   15.03    1.67
   1   5  -2    9.91    1.64
  -1   5   2   10.90    3.14
   1   5  -2   11.04    1.53
  -1   5   2   13.29    2.96
  -1   5   1 1111.24   13.01
  -1   5   1 1068.40   11.71
   1   5  -1 1079.52   10.76
   1   5   0   64.18    3.74
  -1   5   0   65.33    3.45
  -1   5  -1  653.32    7.43
   1   5   1  660.19   10.21
  -1   5  -2 1862.23   22.89
   1   5   2 1933.30   18.15
   1   5   3  563.42   10.55
  -1   5  -3  547.11   13.81
   1   5   4  678.85   12.08
  -1   5  -4  667.87   16.34
   1   5   5 2469.47   23.69
  -1   5  -5 2475.56   32.10
  -1   5  -5 2417.80   30.34
  -1   5  -6  116.59    9.32
  -1   5  -6  120.27    9.07
   1   5   6  134.21    6.59
   1   5   7 5222.10   37.97
  -1   5  -7 5250.14   52.47
  -1   5  -7 5141.35   50.45
   1   5   8  267.93    9.79
  -1   5  -8  254.05   13.51
  -1   5  -8  267.11   14.12
   1   5   9  615.81   15.02
  -1   5  -9  597.81   20.68
  -1   5  -9  629.60   21.51
  -1   5 -10  547.06   21.57
   1   5  10  573.41   15.16
  -1   5 -10  581.80   21.86
  -1   5 -11   68.68   11.89
   1   5  11   58.33    7.03
  -1   5 -11   48.68   10.61
  -1   5 -12  490.45   23.26
  -1   5 -12  513.18   23.65
  -1   5 -13  611.92   27.23
  -1   5 -13  672.58   28.21
  -1   5 -14   18.33   12.45
  -1   5 -14   25.25   13.20
  -1   5 -15  621.81   30.96
  -1   5 -15  657.55   31.37
  -1   5 -16   41.85   16.89
  -1   5 -16   12.13   15.49
   1   6 -16   -7.33   14.92
   1   6 -16   23.91   15.67
   1   6 -15   66.15   15.35
   1   6 -15   66.82   15.57
   1   6 -14   13.11   12.94
   1   6 -14    1.89   12.38
   1   6 -13  895.91   32.28
   1   6 -13  945.00   32.29
   1   6 -12   48.82   11.72
  -1   6  12   47.35    8.01
   1   6 -12   29.35   11.72
   1   6 -11 1023.02   30.84
  -1   6  11  955.16   21.45
   1   6 -11  923.12   27.98
   1   6 -10  207.88   14.12
   1   6 -10  177.36   14.08
  -1   6  10  199.29   10.20
   1   6  -9  117.91   11.60
   1   6  -9  106.45   10.04
  -1   6   9   94.16    7.16
  -1   6   8   44.54    5.55
   1   6  -8   32.24    8.12
   1   6  -8   46.30    7.70
   1   6  -7 1117.37   25.92
   1   6  -7 1164.16   23.51
  -1   6   7 1175.95   19.27
   1   6  -6   28.91    7.19
  -1   6   6   39.21    4.60
   1   6  -6   24.83    5.93
   1   6  -5 2886.50   31.05
   1   6  -5 2954.04   36.48
  -1   6   5 3010.92   27.80
   1   6  -4  199.67    8.30
  -1   6   4  191.37    7.31
  -1   6   3 6122.18   36.12
  -1   6   2   10.55    2.86
  -1   6   2    9.06    3.03
   1   6  -2   11.68    1.82
   1   6  -1   82.56    3.81
  -1   6   1   79.49    4.48
   1   6  -1   75.75    3.15
  -1   6   1   85.16    4.28
  -1   6   0 1236.34   13.15
   1   6   0 1284.04   13.96
  -1   6  -1 2226.57   14.85
   1   6   1 2157.80   19.50
   1   6   2   12.72    3.28
  -1   6  -3 7816.50   53.36
   1   6   3 7828.23   40.84
  -1   6  -4  186.64   10.17
   1   6   4  182.88    7.10
  -1   6  -5 1746.77   28.49
   1   6   5 1726.41   21.17
  -1   6  -6  395.68   15.23
   1   6   6  356.10   10.45
  -1   6  -7   16.43    7.43
   1   6   7   11.45    4.17
  -1   6  -7   22.72    7.11
  -1   6  -8   58.96    9.08
   1   6   8   63.07    6.22
  -1   6  -8   54.65    9.45
  -1   6  -9 1539.63   32.30
   1   6   9 1565.29   24.34
  -1   6  -9 1501.84   33.43
  -1   6 -10  239.51   16.04
  -1   6 -10  243.68   15.64
   1   6  10  227.08   10.71
   1   6  11  571.03   16.68
  -1   6 -11  565.49   24.11
  -1   6 -11  528.85   22.75
  -1   6 -12    1.91   10.36
  -1   6 -12   11.66   11.05
  -1   6 -13  512.45   25.42
  -1   6 -13  480.13   25.57
  -1   6 -14   87.24   16.28
  -1   6 -14   84.22   16.05
  -1   6 -15  281.01   23.71
  -1   6 -15  242.17   21.85
  -1   6 -16   78.13   18.02
   1   7 -16    2.04   14.99
   1   7 -16    3.87   15.83
   1   7 -15  586.31   31.49
   1   7 -15  562.96   29.48
   1   7 -14  140.20   17.96
   1   7 -14  152.74   17.59
   1   7 -13  142.83   16.86
   1   7 -13  119.30   15.45
   1   7 -12  702.37   28.87
   1   7 -12  702.93   26.66
  -1   7  12  705.45   20.29
   1   7 -11   46.85   11.44
  -1   7  11   47.03    7.58
   1   7 -11   42.92   10.51
   1   7 -10  100.14   11.63
   1   7 -10   90.97   12.46
  -1   7  10  103.87    8.59
   1   7  -9 3196.81   49.27
   1   7  -9 3149.00   44.69
  -1   7   9 3053.20   35.48
  -1   7   8   46.97    5.91
   1   7  -8   41.75    9.80
   1   7  -8   59.35    8.54
   1   7  -7  571.58   20.02
   1   7  -7  560.40   17.35
  -1   7   7  571.35   14.38
   1   7  -6  400.04   16.09
   1   7  -6  415.99   14.07
  -1   7   6  385.86   11.59
  -1   7   5 1844.03   23.01
  -1   7   4  649.46   13.40
  -1   7   3 1362.00   17.80
  -1   7   3 1227.67   17.31
   1   7  -2  464.41    6.80
  -1   7   2  445.61   10.17
   1   7  -1 1579.81   12.65
  -1   7   1 1545.90   17.22
   1   7  -1 1603.90   15.05
  -1   7   1 1608.23   16.02
   1   7  -1 1598.27   14.72
  -1   7   0  756.62   11.09
   1   7   0  732.13   11.36
   1   7   1  544.31   10.73
  -1   7  -1  539.36    8.09
  -1   7  -2 1742.48    8.65
   1   7   2 1701.42   19.85
   1   7   3    4.04    3.20
   1   7   4 1339.63   18.95
  -1   7  -4 1297.74   25.03
  -1   7  -5 2308.80   34.75
   1   7   5 2289.65   25.70
  -1   7  -6  178.34   12.20
   1   7   6  193.78    8.58
   1   7   7 2013.23   26.21
  -1   7  -7 1959.77   35.40
   1   7   8  455.21   13.56
  -1   7  -8  432.19   19.06
  -1   7  -9  252.23   16.23
   1   7   9  257.65   11.27
  -1   7 -10  210.52   15.86
   1   7  10  196.98   10.63
  -1   7 -10  180.68   14.47
  -1   7 -11   51.31   11.64
   1   7  11   64.96    7.81
  -1   7 -11   71.59   12.44
   1   7  12  363.36   14.77
  -1   7 -12  378.91   22.24
   1   7  12  378.65   15.36
  -1   7 -12  374.47   21.30
  -1   7 -13  881.36   33.81
  -1   7 -14    3.40   13.07
  -1   7 -15  463.93   28.57
  -1   7 -16  120.52   20.71
   1   8 -15   21.46   14.84
   1   8 -14  533.50   27.76
   1   8 -14  513.94   28.29
  -1   8  13   38.21    8.50
   1   8 -13   56.84   15.94
   1   8 -13   67.43   13.82
  -1   8  12   20.55    7.35
   1   8 -12   20.73   12.20
   1   8 -12   -1.50   11.04
   1   8 -11  152.95   14.16
  -1   8  11  167.08   11.46
   1   8 -11  142.89   15.54
  -1   8  10  653.20   18.55
   1   8 -10  676.05   26.10
   1   8 -10  697.52   23.90
   1   8  -9   18.91    8.10
  -1   8   9   10.36    5.09
  -1   8   8 2074.14   29.25
   1   8  -8 2111.36   39.63
   1   8  -8 2060.90   34.60
  -1   8   7  865.09   18.41
   1   8  -7  792.27   20.84
  -1   8   6 1137.99   19.98
  -1   8   5 1514.48   22.07
  -1   8   4  198.67    8.39
  -1   8   3  706.74   14.04
  -1   8   3  696.21   13.41
   1   8  -2 1669.62   13.64
  -1   8   2 1658.74   20.10
  -1   8   1  510.63   10.76
   1   8  -1  529.57    9.25
   1   8  -1  543.64    9.43
  -1   8   1  520.60    9.84
   1   8  -1  570.37    7.95
   1   8   0 5027.95   30.97
  -1   8   0 5010.25   29.75
  -1   8  -1  819.97   10.67
   1   8   1  862.57   14.03
  -1   8  -2   25.56    1.92
   1   8   2   34.19    4.20
   1   8   3   94.80    6.04
   1   8   4   49.32    5.24
  -1   8  -5  779.33   22.02
   1   8   5  823.18   16.52
   1   8   6 3517.70   34.71
  -1   8  -6 3534.49   47.38
  -1   8  -7   67.50   10.05
   1   8   7   85.81    6.92
  -1   8  -8  680.99   23.91
   1   8   8  718.44   17.47
  -1   8  -9  845.14   27.49
   1   8   9  845.72   19.85
  -1   8 -10   56.81   12.05
   1   8  10   61.48    7.47
  -1   8 -11   81.53   13.70
   1   8  11   72.82    8.35
   1   8  12  309.28   14.79
  -1   8 -12  297.73   21.29
   1   8  12  294.74   14.01
  -1   8 -13  127.66   17.56
  -1   8 -14 1125.94   41.07
  -1   8 -15  159.18   21.06
  -1   8 -16  162.87   22.52
  -1   9  13    9.59    8.14
   1   9 -12 1342.87   40.02
  -1   9  12 1252.33   28.56
   1   9 -11    0.36   10.38
  -1   9  11   13.30    7.13
  -1   9  10 1064.10   24.24
  -1   9   9   11.72    5.86
  -1   9   8  240.76   11.53
  -1   9   7  120.87    8.28
  -1   9   6 1397.81   23.26
  -1   9   5  157.80    8.32
  -1   9   4 3763.06   34.75
  -1   9   4 3964.35   34.47
  -1   9   3   13.45    3.97
  -1   9   3   10.78    4.29
  -1   9   2  942.29   16.02
   1   9  -2  958.06   11.13
  -1   9   2  976.29   15.14
  -1   9   1  113.27    5.59
  -1   9   1  116.31    6.07
   1   9  -1  122.05    4.22
   1   9  -1  125.30    5.24
   1   9   0 1188.51   15.73
   1   9   0 1149.38   15.86
  -1   9   0 1109.31   14.99
   1   9   0 1216.13   14.95
   1   9   1   32.96    4.18
  -1   9  -1   32.67    3.23
   1   9   2 1240.02   18.50
  -1   9  -2 1315.28   10.63
   1   9   3  592.84   13.74
   1   9   4 3958.48   35.64
   1   9   5  182.28    8.89
   1   9   6   72.22    6.71
  -1   9  -6   44.33    9.03
   1   9   7  122.78    8.35
  -1   9  -7  101.13   12.24
  -1   9  -8  544.07   22.75
   1   9   8  543.77   15.97
  -1   9  -9  203.10   16.33
   1   9   9  177.02   10.54
   1   9  10 2028.78   32.69
  -1   9 -10 1922.01   43.80
   1   9  11   51.22    8.25
   1   9  11   60.32    8.19
  -1   9 -11   63.98   13.86
   1   9  12  859.67   23.75
   1   9  12  872.87   23.51
  -1   9 -12  932.50   34.55
  -1   9 -13   59.18   15.70
  -1   9 -14  -22.99   15.04
  -1   9 -15   23.10   16.49
  -1  10  13  596.26   21.90
  -1  10  12    0.42    7.20
  -1  10  11  148.61   11.34
  -1  10  10  269.08   13.64
  -1  10   9  348.45   14.57
  -1  10   8 1363.40   25.99
  -1  10   7  264.81   11.72
  -1  10   6   46.64    6.70
  -1  10   5  466.18   13.87
  -1  10   4   41.13    5.51
  -1  10   3  117.74    7.23
   1  10  -3  106.30    2.31
  -1  10   3  114.84    6.83
   1  10  -3  100.61    2.42
  -1  10   2 4179.29   31.42
  -1  10   2 4013.96   33.75
   1  10  -2 4105.56   23.96
  -1  10   1   16.06    4.14
   1  10  -1   17.02    2.61
   1  10  -1   17.03    3.13
   1  10   0 4326.85   31.66
  -1  10   0 4353.07   30.54
   1  10   0 4409.81   31.41
  -1  10  -1  723.79   11.17
   1  10   1  692.67   13.93
   1  10   1  709.08   13.74
   1  10   2  952.98   17.10
  -1  10  -2  952.58    9.93
   1  10   3 1306.06   20.76
   1  10   4  103.86    7.19
   1  10   5  411.84   13.23
   1  10   6  755.13   17.98
   1  10   7   25.97    6.14
  -1  10  -8  595.68   24.35
   1  10   8  563.67   17.02
  -1  10  -9  678.51   26.93
   1  10   9  633.23   19.00
   1  10  10   97.23    9.35
  -1  10 -10   86.40   14.20
   1  10  10   94.37    9.04
  -1  10 -11  521.96   26.92
   1  10  11  516.41   18.67
   1  10  11  510.10   18.30
   1  10  12  418.06   17.68
  -1  10 -12  461.94   26.46
   1  10  12  448.04   18.39
   1  10  13  106.68   11.20
  -1  10 -13   95.42   17.31
   1  10  13   94.09   10.88
  -1  10 -14  829.24   37.23
  -1  10 -15   62.95   17.95
  -1  11  14   90.32   11.64
  -1  11  13  269.37   16.11
  -1  11  12  211.36   14.14
  -1  11  11  334.40   16.18
  -1  11  10  268.17   14.09
  -1  11   9  841.21   22.20
  -1  11   8   35.78    6.97
  -1  11   7 1399.09   26.24
  -1  11   6  230.06   11.23
  -1  11   5  170.14    9.54
  -1  11   4  344.76   12.09
  -1  11   3  954.04   17.29
   1  11  -3  919.85    7.11
  -1  11   3  916.17   18.21
  -1  11   2  842.56   16.54
   1  11  -2  821.35   11.47
  -1  11   2  814.10   14.76
  -1  11   1 3467.08   31.22
   1  11  -1 3615.30   27.64
   1  11  -1 3453.19   20.60
  -1  11   0  277.68    8.52
   1  11   0  283.41    8.09
   1  11   0  282.86    8.80
   1  11   1 2047.02   24.43
   1  11   1 2152.32   24.63
   1  11   1 2134.15   23.46
  -1  11  -1 2182.38   19.96
   1  11   2   20.19    4.48
  -1  11  -2   20.48    2.44
   1  11   2   23.07    4.37
   1  11   3   72.63    6.54
   1  11   3   85.67    6.65
   1  11   4  509.17   14.49
   1  11   5 1507.51   25.10
   1  11   6   28.05    6.00
   1  11   7  401.83   14.82
   1  11   8  240.37   12.37
   1  11   8  244.33   12.13
   1  11   9  514.87   17.39
   1  11   9  528.57   18.14
   1  11  10  673.95   20.46
   1  11  10  688.70   21.09
   1  11  11  189.65   13.11
   1  11  11  154.49   12.06
   1  11  12  148.64   12.42
   1  11  12  151.29   12.38
   1  11  13  760.91   24.63
  -1  12  14    5.21    9.73
  -1  12  13  539.22   22.14
  -1  12  12   98.50   11.60
  -1  12  11  704.88   23.25
  -1  12  10   10.70    7.69
  -1  12   9  139.48   11.24
  -1  12   8   94.42    9.37
  -1  12   7  658.96   19.08
  -1  12   6  276.86   12.56
  -1  12   5 3710.14   40.52
  -1  12   4    2.33    4.85
  -1  12   3 1020.93   19.77
  -1  12   3 1079.93   18.93
   1  12  -3 1089.33    8.20
   1  12  -2  418.07    8.87
  -1  12   2  453.52   11.90
  -1  12   2  457.26   12.96
   1  12  -1  571.40   11.78
  -1  12   1  558.09   13.45
   1  12   0   27.35    3.95
   1  12   0   35.67    4.60
  -1  12   0   27.62    4.04
   1  12   1 2480.03   27.46
   1  12   1 2550.16   27.62
   1  12   1 2394.75   25.38
  -1  12  -1 2542.30   22.43
   1  12   2   92.62    6.96
  -1  12  -2  106.37    4.21
   1  12   2   85.30    6.71
   1  12   2   89.61    6.73
   1  12   3 1214.50   21.76
   1  12   3 1219.14   21.48
   1  12   4  393.76   13.47
   1  12   4  409.92   13.46
   1  12   5  919.10   20.69
   1  12   5  930.65   20.45
   1  12   6   17.98    6.18
   1  12   6   17.92    6.00
   1  12   7  168.41   10.95
   1  12   7  167.14   10.74
   1  12   8  236.41   12.48
   1  12   8  239.56   12.73
   1  12   9 1130.06   26.29
   1  12   9 1040.10   24.84
   1  12  10    5.04    7.35
   1  12  10    2.29    6.81
   1  12  11 1417.11   31.25
   1  12  11 1314.62   30.19
   1  12  12   35.94    9.60
   1  12  13  151.44   13.56
   1  12  14   35.19   10.65
  -1  13  15  355.83   20.98
  -1  13  14   92.20   13.39
  -1  13  13  152.08   13.76
  -1  13  12   90.16   11.90
  -1  13  11  217.78   14.43
  -1  13  10  283.83   15.54
  -1  13   9  673.97   21.71
  -1  13   8  288.00   14.41
  -1  13   7 1574.59   29.65
  -1  13   6  326.91   14.04
  -1  13   5   44.87    6.89
  -1  13   4 1600.90   26.66
  -1  13   3  361.04   12.74
   1  13  -3  332.03    4.78
   1  13  -2   31.06    3.62
  -1  13   2   37.60    5.22
  -1  13   2   37.20    5.81
   1  13  -1 2296.79   23.71
  -1  13   1 2355.01   27.58
  -1  13   0   32.32    4.59
   1  13   0   32.02    4.67
   1  13   0   29.47    3.88
   1  13   1  862.72   15.80
  -1  13  -1  799.86   13.38
   1  13   1  827.73   16.79
   1  13   2  679.15   16.19
   1  13   2  752.24   16.20
  -1  13  -2  711.90   10.04
   1  13   2  662.35   15.84
   1  13   3  107.05    7.81
   1  13   3  119.43    8.41
   1  13   4  828.38   19.32
   1  13   4  869.46   20.09
   1  13   5  854.73   20.69
   1  13   5  890.43   20.80
   1  13   6    7.76    5.97
   1  13   6    9.11    6.19
   1  13   7 1427.94   28.27
   1  13   7 1419.19   27.79
   1  13   8   70.48    9.04
   1  13   8   64.78    8.68
   1  13   9  304.61   15.50
   1  13   9  271.51   14.53
   1  13  10  836.51   24.31
   1  13  10  808.21   24.03
   1  13  11   69.50    9.98
   1  13  11   77.70   10.52
   1  13  12  118.97   12.74
   1  13  13  623.95   24.05
   1  13  14   20.65   10.33
  -1  14  14  423.41   22.43
  -1  14  13   46.98   11.16
  -1  14  12    7.01    8.61
  -1  14  11  133.76   13.09
  -1  14  10  316.10   16.96
  -1  14   9   10.65    7.86
  -1  14   8 1692.21   32.86
  -1  14   7   45.18    8.02
  -1  14   6  346.32   14.76
  -1  14   5  219.91   11.82
  -1  14   4  126.23    8.98
  -1  14   3  672.98   17.57
   1  14  -2 1413.54   16.82
  -1  14   2 1382.43   23.51
   1  14  -1   14.25    3.87
  -1  14   1   22.66    4.93
  -1  14   0 1559.21   21.17
   1  14   0 1537.19   22.04
   1  14   0 1610.97   18.56
  -1  14  -1   14.84    3.67
   1  14   1   11.26    4.52
   1  14   1   12.24    4.23
   1  14   2  581.40   15.52
  -1  14  -2  585.00    9.42
   1  14   2  623.22   15.25
   1  14   3  764.98   18.48
   1  14   4  734.64   19.07
   1  14   4  709.34   18.61
   1  14   5   44.21    6.78
   1  14   5   43.08    7.21
   1  14   6  668.63   19.63
   1  14   6  648.03   19.38
   1  14   7   72.58    9.00
   1  14   7   69.76    8.92
   1  14   8 1295.90   28.57
   1  14   8 1375.24   29.45
   1  14   9  114.72   11.19
   1  14   9  128.50   11.39
   1  14  10   25.23    8.36
   1  14  11  331.32   17.37
   1  14  12  292.27   17.37
   1  14  13    2.50   10.08
   1  14  14  674.76   26.71
  -1  15  14  344.38   21.09
  -1  15  13   46.96   12.50
  -1  15  12  606.66   24.45
  -1  15  11   10.57    9.02
  -1  15  10  282.04   16.45
  -1  15   9   16.02    8.09
  -1  15   8    6.80    7.67
  -1  15   7   95.52   10.08
  -1  15   6 1428.13   29.05
  -1  15   5   -5.50    5.96
  -1  15   4 2569.54   35.88
  -1  15   3  183.10   10.49
   1  15  -2  488.86   10.29
  -1  15   2  516.17   15.31
   1  15  -1   73.32    5.80
  -1  15   1   68.53    6.44
   1  15   0    9.99    4.56
  -1  15   0    6.09    4.28
   1  15   1  223.98   10.11
   1  15   1  219.62    8.80
  -1  15  -1  229.11    8.14
  -1  15  -2 2833.03   20.40
   1  15   2 2796.73   31.60
   1  15   2 2758.73   33.93
   1  15   3   39.26    6.82
   1  15   4  669.96   18.70
   1  15   5   65.03    8.06
   1  15   6   85.88    9.28
   1  15   7   12.33    7.19
   1  15   8  531.83   19.51
   1  15   9   76.13   10.16
   1  15  10  848.17   26.13
   1  15  11    0.39    8.85
   1  15  12  522.50   22.73
   1  15  13  115.57   13.79
   1  15  14    8.15   11.05
  -1  16  13  205.97   17.42
  -1  16  12   56.83   12.50
  -1  16  11  269.65   17.36
  -1  16  10  386.65   19.22
  -1  16   9   15.02    8.28
  -1  16   8  283.13   15.64
  -1  16   7   50.31    8.86
  -1  16   6  639.56   20.66
  -1  16   5  819.71   22.33
  -1  16   4  580.26   18.47
  -1  16   3  518.47   16.67
  -1  16   2  960.11   20.85
   1  16  -2  948.47   14.02
   1  16  -1  203.56    8.77
  -1  16   1  187.98    9.48
   1  16   0 1187.53   20.23
  -1  16   0 1141.38   19.18
   1  16   1  252.19   11.04
  -1  16  -1  251.58    8.66
   1  16   1  277.35    9.74
   1  16   2  576.67   16.80
   1  16   2  553.08   14.74
   1  16   3  322.45   13.39
   1  16   4  305.87   13.81
   1  16   5  110.03    9.83
   1  16   6  676.21   20.89
   1  16   7   24.06    7.95
   1  16   8  459.56   19.02
   1  16   9  409.26   18.81
   1  16  10   63.38   11.12
   1  16  11  263.24   17.41
   1  16  12  414.23   21.34
   1  16  13   93.26   13.95
  -1  17  12  158.93   15.91
  -1  17  11   33.42   10.80
  -1  17  10  103.07   13.02
  -1  17   9  583.57   22.84
  -1  17   8   54.92   10.39
  -1  17   7  577.31   21.29
  -1  17   6  271.64   15.27
  -1  17   5    9.98    7.25
  -1  17   4  159.76   11.39
  -1  17   3 1089.89   24.11
  -1  17   2    3.65    5.52
   1  17  -1 1445.39   21.18
  -1  17   1 1448.23   24.06
  -1  17   0   43.45    6.01
   1  17   0   45.15    6.48
  -1  17  -1 1260.32   18.24
   1  17   1 1231.10   22.93
   1  17   1 1285.24   25.73
   1  17   2  704.59   16.19
   1  17   2  688.47   18.58
   1  17   3   -8.54    7.07
   1  17   4   23.34    7.13
   1  17   5  311.93   14.83
   1  17   6  179.19   12.84
   1  17   7 1015.73   27.26
   1  17   8  254.63   15.44
   1  17   9  115.75   12.11
   1  17  10   95.20   12.30
   1  17  11  165.10   15.43
   1  17  12  159.61   16.17
  -1  18  12   11.39   11.28
  -1  18  11  688.54   27.44
  -1  18  10   35.78   10.73
  -1  18   9   58.07   11.04
  -1  18   8   40.10    9.59
  -1  18   7  355.31   17.93
  -1  18   6    8.04    7.97
  -1  18   5 1010.46   26.18
  -1  18   4   52.43    8.81
  -1  18   3 1675.45   30.17
  -1  18   2   46.37    7.46
  -1  18   1   76.28    7.56
   1  18  -1   73.51    6.53
  -1  18   0   11.34    4.91
   1  18   0   13.59    5.39
   1  18   1  192.35   10.69
  -1  18  -1  202.13    8.14
   1  18   2    7.63    4.91
   1  18   2    8.99    6.24
   1  18   3 2250.25   35.21
   1  18   4   41.46    8.56
   1  18   5  392.16   17.03
   1  18   6  137.98   12.12
   1  18   7   26.49    9.15
   1  18   8    8.36    8.94
   1  18   9  611.43   23.92
   1  18  10   60.28   11.97
   1  18  11  851.72   29.39
   1  18  12   11.65   11.01
  -1  19  11   50.22   12.93
  -1  19  10   22.15   10.73
  -1  19   9  377.59   20.31
  -1  19   8    1.41    9.20
  -1  19   7  582.15   22.76
  -1  19   6  808.05   25.33
  -1  19   5   73.34   10.51
  -1  19   4  284.67   14.61
  -1  19   3  193.20   12.08
  -1  19   2  607.80   18.05
   1  19  -1  752.54   15.55
  -1  19   1  776.50   18.69
  -1  19   0  116.63    7.79
   1  19   0  118.04    8.37
   1  19   1  539.94   16.73
   1  19   2  131.48   10.11
   1  19   3   92.67    9.88
   1  19   4  257.83   14.58
   1  19   5  393.22   17.73
   1  19   6  106.02   11.88
   1  19   7  719.39   24.99
   1  19   8  309.36   18.08
   1  19   9  123.74   14.04
   1  19  10   87.34   13.16
   1  19  11   39.23   12.85
  -1  20  10  638.06   27.07
  -1  20   9   13.06   10.52
  -1  20   8  549.06   23.55
  -1  20   7   28.32    9.99
  -1  20   6  465.15   20.25
  -1  20   5  280.33   15.95
  -1  20   4   16.83    8.21
  -1  20   3   19.95    7.22
  -1  20   2  820.27   21.08
  -1  20   1    9.63    5.86
   1  20   0  816.32   18.58
  -1  20   0  829.11   17.65
   1  20   1  250.94   12.45
   1  20   2   45.17    8.35
   1  20   3  204.39   12.75
   1  20   4  120.76   11.23
   1  20   5  107.01   11.84
   1  20   6 1358.19   32.76
   1  20   7   37.14   10.66
   1  20   8  320.42   18.98
   1  20   9   85.69   12.95
   1  20  10  114.27   14.26
  -1  21   9   -0.46   10.32
  -1  21   8    4.51   10.12
  -1  21   7    3.22    9.51
  -1  21   6  763.49   25.51
  -1  21   5   43.65    9.69
  -1  21   4  588.77   20.71
  -1  21   3   53.54    9.25
  -1  21   2  425.80   16.00
  -1  21   1  279.07   12.68
   1  21   1   55.59    7.96
   1  21   2  664.32   20.20
   1  21   3   92.94   10.56
   1  21   4  961.82   26.38
   1  21   5    3.97    8.01
   1  21   6  124.13   12.57
   1  21   7    4.25    9.24
   1  21   8  239.78   17.16
   1  21   9   32.65   12.11
  -1  22   8  705.39   27.03
  -1  22   7   85.48   12.87
  -1  22   6  120.84   13.03
  -1  22   5  218.47   14.82
  -1  22   4   62.08   10.27
  -1  22   3  326.13   15.55
  -1  22   2  519.04   17.70
   1  22   1   57.82    8.12
   1  22   2   29.54    7.77
   1  22   3  425.47   17.99
   1  22   4  134.35   12.53
   1  22   5   63.61   11.03
   1  22   6  590.18   23.57
   1  22   7   30.93   10.59
   1  22   8  393.01   21.33
  -1  23   7  410.25   21.38
  -1  23   6   22.65    9.97
  -1  23   5    1.77    8.89
  -1  23   4   96.65   10.81
  -1  23   3  226.15   13.58
   1  23   2   39.35    8.56
   1  23   3   23.16    8.73
   1  23   4  326.25   17.51
   1  23   5  230.59   16.26
   1  23   6   21.53   10.46
   1  23   7  641.98   26.17
  -1  24   5  563.55   21.94
  -1  24   4   17.59    9.48
   1  24   3  501.95   19.53
   1  24   4   55.16   10.34
   1  24   5  433.39   20.69
   1  25   4  182.07   14.04
  -2 -25   2  110.89   14.32
   2 -25  -2  111.66   15.73
  -2 -25   1  427.18   22.73
   2 -25  -1  402.49   23.04
   2 -25   0  169.12   16.89
  -2 -25   0  129.69   15.17
   2 -25   1  141.37   15.58
  -2 -25  -1  139.81   16.35
   2 -24  -6  128.85   18.17
   2 -24  -4  153.01   17.06
   2 -24  -3   41.08   12.71
  -2 -24   2  405.54   20.92
   2 -24  -2  344.43   20.94
  -2 -24   1   25.97   11.12
   2 -24  -1   20.87   11.11
  -2 -24   0  556.96   24.52
   2 -24   0  540.46   24.57
  -2 -24  -1  108.14   14.09
   2 -24   1  139.54   15.25
  -2 -24  -2   60.35   12.46
  -2 -24  -3    3.36   10.96
  -2 -24  -4  291.25   20.24
   2 -23  -7   62.29   16.49
   2 -23  -6  729.18   29.28
   2 -23  -6  741.14   31.23
   2 -23  -5   61.57   12.84
   2 -23  -4  452.80   23.76
   2 -23  -3   22.70   10.80
  -2 -23   2   41.51   10.93
   2 -23  -2   45.03   10.91
   2 -23  -1  258.38   17.85
  -2 -23   1  231.41   17.08
   2 -23   0  329.41   19.18
  -2 -23   0  310.43   18.84
   2 -23   1   22.84   10.37
  -2 -23  -1   46.88   11.34
  -2 -23  -2  689.69   26.71
  -2 -23  -3   30.32   11.50
  -2 -23  -4  187.21   17.15
  -2 -23  -5   66.04   13.29
  -2 -23  -6    3.56   11.34
   2 -22  -8  525.13   25.24
   2 -22  -8  575.66   29.90
   2 -22  -7  508.24   24.59
   2 -22  -7  561.26   27.87
   2 -22  -6   11.51   10.26
   2 -22  -5  227.97   18.00
   2 -22  -4   16.33   10.34
  -2 -22   3  523.92   21.73
   2 -22  -3  528.61   23.70
  -2 -22   2  272.80   16.69
   2 -22  -2  264.51   17.91
   2 -22  -1  142.10   13.99
  -2 -22   1  127.89   13.17
   2 -22   0  260.97   17.03
  -2 -22   0  281.93   17.50
   2 -22   1  247.47   16.16
  -2 -22  -1  264.96   17.11
  -2 -22  -2   23.56    9.63
   2 -22   2    8.92    8.51
  -2 -22  -3  687.63   26.23
  -2 -22  -4  270.69   18.42
  -2 -22  -5   11.72   10.22
  -2 -22  -6  318.77   19.84
  -2 -22  -7   51.30   12.10
  -2 -22  -8  219.82   18.33
   2 -21  -9 1089.25   34.09
   2 -21  -9  956.55   36.17
   2 -21  -8   45.00   15.71
   2 -21  -8    4.35   10.97
   2 -21  -7  231.45   18.11
   2 -21  -7  180.56   18.21
   2 -21  -6   10.15   10.14
   2 -21  -5   15.92    9.36
   2 -21  -4    6.98   10.01
   2 -21  -3  673.25   25.35
  -2 -21   3  770.78   24.44
  -2 -21   2   66.08   10.11
   2 -21  -2   70.10   11.10
   2 -21  -1 1479.24   34.68
  -2 -21   1 1396.85   33.02
   2 -21   0   81.30   11.04
  -2 -21   0   81.03   11.37
   2 -21   1  248.15   15.84
  -2 -21  -1  260.35   16.05
   2 -21   2   56.32   10.25
  -2 -21  -2   35.94   10.02
  -2 -21  -3   55.36   10.81
  -2 -21  -4  212.92   16.00
  -2 -21  -5  759.80   27.42
  -2 -21  -6   10.47   10.68
  -2 -21  -7  320.22   19.54
  -2 -21  -8   86.49   13.55
  -2 -21  -9   78.38   13.64
   2 -20 -10  190.22   20.20
   2 -20 -10  203.56   16.93
   2 -20  -9   61.99   12.73
   2 -20  -9   77.59   15.87
   2 -20  -8   28.41   13.73
   2 -20  -8   41.80   11.44
   2 -20  -7  502.08   24.92
   2 -20  -7  545.75   23.53
   2 -20  -6   43.63   10.32
   2 -20  -5  612.84   24.43
   2 -20  -4  105.38   12.23
   2 -20  -3   85.28   12.14
  -2 -20   3  107.22   11.48
  -2 -20   2  171.41   12.63
   2 -20  -2  203.80   14.50
  -2 -20   1   60.79    9.65
   2 -20  -1   58.64   10.15
  -2 -20   0  232.33   14.99
   2 -20   0  273.04   15.66
   2 -20   1 1507.90   32.81
  -2 -20  -1 1376.90   32.64
  -2 -20  -2   14.02    8.44
   2 -20   2   16.51    8.35
  -2 -20  -3  654.75   23.90
  -2 -20  -4   65.19   11.46
  -2 -20  -5   96.87   12.38
  -2 -20  -6  155.94   14.80
  -2 -20  -7   78.44   12.72
  -2 -20  -8   71.82   12.93
  -2 -20  -9 1076.93   32.20
  -2 -20 -10   10.69   10.52
  -2 -20 -10   11.70   11.86
  -2 -20 -11  218.68   16.59
   2 -19 -11   59.47   17.18
   2 -19 -11   35.18   11.90
   2 -19 -10  114.14   17.75
   2 -19 -10  128.98   13.95
   2 -19  -9  279.57   21.33
   2 -19  -9  253.54   17.77
   2 -19  -8  249.15   16.92
   2 -19  -8  241.54   20.18
   2 -19  -7   89.12   12.45
   2 -19  -7   81.50   14.95
   2 -19  -6  510.45   21.95
   2 -19  -5   33.27   10.23
   2 -19  -4  825.19   26.13
  -2 -19   3  593.68   20.02
   2 -19  -3  518.13   20.79
  -2 -19   2   56.75    9.02
   2 -19  -2   56.64   10.34
  -2 -19   1  640.09   20.97
   2 -19  -1  634.12   21.64
  -2 -19   0  197.34   13.41
   2 -19   0  244.00   14.47
  -2 -19  -1  233.76   14.68
   2 -19   1  211.76   13.36
   2 -19   2  629.44   20.59
  -2 -19  -2  544.26   20.69
   2 -19   3   48.98    8.58
  -2 -19  -3   31.83    8.59
  -2 -19  -4  537.01   21.58
  -2 -19  -5  256.08   15.88
  -2 -19  -6   54.10   10.19
  -2 -19  -7  195.37   15.55
  -2 -19  -8  275.61   17.35
  -2 -19  -9   18.56   10.08
  -2 -19 -10  727.32   26.06
  -2 -19 -10  650.59   27.43
  -2 -19 -11  146.33   17.07
  -2 -19 -11  174.65   14.97
   2 -18 -12  140.79   20.41
   2 -18 -11   31.14   15.74
   2 -18 -11   25.98   10.46
   2 -18 -10  425.73   20.64
   2 -18 -10  435.30   25.16
   2 -18  -9   97.69   12.63
   2 -18  -9  102.97   15.94
   2 -18  -8  957.68   32.51
   2 -18  -8  980.95   29.08
   2 -18  -7   -4.42    8.93
   2 -18  -7    7.33   11.43
   2 -18  -6   79.35   11.29
   2 -18  -5   77.36   10.49
  -2 -18   4  326.81   14.40
   2 -18  -4  353.08   17.41
  -2 -18   3   23.40    7.33
   2 -18  -3    6.19    7.51
  -2 -18   2 1088.65   25.60
   2 -18  -2 1082.02   27.16
   2 -18  -1  114.45   10.97
  -2 -18   1  118.49   10.70
  -2 -18   0  692.39   21.37
   2 -18   0  720.26   21.70
  -2 -18  -1   74.04   10.03
   2 -18   1   60.07    8.46
   2 -18   2    1.99    6.56
  -2 -18  -2   20.11    7.80
  -2 -18  -3  134.92   11.45
   2 -18   3  130.96   10.44
  -2 -18  -4  897.46   25.85
  -2 -18  -5   26.79    8.96
  -2 -18  -6 1154.03   29.98
  -2 -18  -7   43.40   10.12
  -2 -18  -8  550.04   21.88
  -2 -18  -9   45.46   10.52
  -2 -18 -10   51.98   11.17
  -2 -18 -10   36.77   12.77
  -2 -18 -11   37.49   10.69
  -2 -18 -11   19.84   12.61
   2 -17 -12  577.28   30.06
   2 -17 -11  267.90   21.91
   2 -17 -11  274.75   16.63
   2 -17 -10  216.77   15.40
   2 -17 -10  199.95   19.27
   2 -17  -9  119.96   15.98
   2 -17  -9  137.93   13.54
   2 -17  -8  258.77   19.29
   2 -17  -8  301.02   16.69
   2 -17  -7  211.92   14.65
   2 -17  -7  188.31   16.18
   2 -17  -6  602.63   21.99
   2 -17  -5  100.79   10.93
  -2 -17   4 1395.92   26.65
   2 -17  -4 1414.71   30.88
  -2 -17   3  392.27   14.96
   2 -17  -3  370.38   16.39
  -2 -17   2   13.05    6.26
   2 -17  -2   12.32    7.14
   2 -17  -1   63.84    8.53
  -2 -17   1   83.44    8.78
  -2 -17   0  596.65   19.20
   2 -17   0  570.85   18.73
   2 -17   1   84.21    8.92
  -2 -17  -1   78.98    9.35
   2 -17   2 1500.06   28.07
  -2 -17  -2 1459.61   29.92
   2 -17   3   96.85    8.99
  -2 -17  -3   79.40    9.74
  -2 -17  -4 1263.36   29.08
  -2 -17  -5  323.73   16.15
  -2 -17  -6   50.31    9.59
  -2 -17  -7  231.92   14.91
  -2 -17  -8  195.96   14.29
  -2 -17  -9   -6.30    8.49
  -2 -17 -10  588.40   25.11
  -2 -17 -10  563.17   21.51
  -2 -17 -11    3.80    8.59
  -2 -17 -11   11.34   11.57
  -2 -17 -12  101.13   15.97
   2 -16 -13  664.46   32.67
   2 -16 -12   26.04   14.76
   2 -16 -11  336.54   23.15
   2 -16 -11  299.47   16.75
   2 -16 -10  482.18   24.96
   2 -16 -10  541.80   21.03
   2 -16 -10  507.41   20.60
   2 -16  -9   57.64   10.37
   2 -16  -9   53.38   10.04
   2 -16  -9   61.51   14.07
   2 -16  -8  209.87   16.95
   2 -16  -8  191.90   14.02
   2 -16  -7  133.50   12.30
   2 -16  -7  143.53   15.18
   2 -16  -6  162.16   12.77
   2 -16  -5 2036.59   36.73
   2 -16  -4  234.26   13.39
  -2 -16   4  224.41   11.20
   2 -16  -3   41.90    7.84
  -2 -16   3   37.79    6.98
   2 -16  -2  241.54   12.86
  -2 -16   2  253.50   12.17
   2 -16  -1   17.05    6.38
  -2 -16   1   15.08    6.10
   2 -16   0  258.00   12.49
  -2 -16   0  253.07   12.61
   2 -16   1 1704.57   29.17
  -2 -16  -1 1742.81   30.87
   2 -16   2   71.87    7.96
  -2 -16  -2   75.11    9.00
  -2 -16  -3  797.77   22.32
   2 -16   3  772.21   19.11
  -2 -16  -4  322.30   14.98
  -2 -16  -4  318.48   13.12
  -2 -16  -5  579.47   19.80
  -2 -16  -5  522.10   17.14
  -2 -16  -6 1046.12   26.67
  -2 -16  -6  988.45   23.64
  -2 -16  -7  353.63   16.20
  -2 -16  -7  330.52   16.23
  -2 -16  -8  184.51   13.23
  -2 -16  -8  186.33   13.65
  -2 -16  -9  335.82   17.85
  -2 -16  -9  356.85   17.19
  -2 -16 -10    8.03   10.79
  -2 -16 -10   24.96    9.15
  -2 -16 -10   28.22   11.01
  -2 -16 -11  213.94   17.70
  -2 -16 -11  238.72   14.44
  -2 -16 -12  326.13   21.32
  -2 -16 -13   15.30   13.22
   2 -15 -13   68.55   16.68
   2 -15 -12    9.54   13.54
   2 -15 -11  544.27   26.80
   2 -15 -11  524.36   20.04
   2 -15 -10   17.73    8.36
   2 -15 -10    8.70   11.84
   2 -15 -10   30.56    8.98
   2 -15  -9 1019.02   27.04
   2 -15  -9  965.18   25.39
   2 -15  -9 1010.77   32.39
   2 -15  -8    5.27    7.44
   2 -15  -8    4.43   10.60
   2 -15  -7  525.38   22.01
   2 -15  -7  547.33   19.81
   2 -15  -6  178.06   12.38
   2 -15  -5   15.96    6.62
   2 -15  -4   14.56    6.75
  -2 -15   4   19.16    5.42
  -2 -15   3 1753.20   27.45
   2 -15  -3 1743.77   30.93
  -2 -15   2   26.68    6.12
   2 -15  -2   33.25    6.86
  -2 -15   1  945.68   21.19
   2 -15  -1  972.55   22.22
   2 -15   0   26.32    6.43
  -2 -15   0   16.00    5.93
  -2 -15  -1  267.17   12.76
   2 -15   1  260.72   11.77
  -2 -15  -2  291.66   13.27
   2 -15   2  299.55   12.21
  -2 -15  -3  291.47   13.84
   2 -15   3  264.70   11.16
  -2 -15  -4   78.55    8.06
   2 -15   4   91.93    7.46
  -2 -15  -4   77.02    8.97
  -2 -15  -5 2577.36   34.61
  -2 -15  -5 2699.92   39.37
  -2 -15  -6  423.65   17.06
  -2 -15  -6  410.27   15.59
  -2 -15  -7 1287.01   27.77
  -2 -15  -7 1327.86   28.77
  -2 -15  -8   41.54    9.84
  -2 -15  -8   30.86    8.13
  -2 -15  -9   81.11    9.72
  -2 -15  -9   72.72   11.29
  -2 -15 -10   24.92   10.86
  -2 -15 -10   58.08    9.83
  -2 -15 -10   46.48   10.80
  -2 -15 -11  176.70   16.06
  -2 -15 -11  165.48   11.95
  -2 -15 -11  190.92   16.89
  -2 -15 -12   20.38   12.39
  -2 -15 -12   43.43   12.86
  -2 -15 -13 1032.48   35.53
   2 -14 -14  135.63   19.26
   2 -14 -13  815.60   34.28
   2 -14 -12   95.53   16.38
   2 -14 -11  761.49   30.58
   2 -14 -11  813.95   23.11
   2 -14 -11  798.71   24.67
   2 -14 -10    7.84   10.97
   2 -14 -10    1.49    8.27
   2 -14 -10    3.21    7.29
   2 -14  -9   -8.26    8.02
   2 -14  -9    2.99   10.81
   2 -14  -9   12.72    7.28
   2 -14  -8  409.74   17.28
   2 -14  -8  417.37   20.37
   2 -14  -7  296.04   14.76
   2 -14  -7  306.02   17.24
   2 -14  -6   63.50    8.88
   2 -14  -5 1424.58   28.54
  -2 -14   5 1392.55   22.88
   2 -14  -4  268.30   13.09
  -2 -14   4  299.45   11.32
  -2 -14   3  541.18   14.92
   2 -14  -3  526.33   16.96
   2 -14  -2  949.16   21.67
  -2 -14   2  896.39   19.40
  -2 -14   1  491.40   14.95
   2 -14  -1  486.70   15.47
  -2 -14   0  356.52   13.07
   2 -14   0  319.78   12.47
   2 -14   1 1540.63   25.33
  -2 -14  -1 1543.97   26.60
  -2 -14  -2  219.69   11.34
   2 -14   2  218.41    9.99
  -2 -14  -3 2367.42   34.32
   2 -14   3 2474.08   29.74
  -2 -14  -4   45.65    7.25
   2 -14   4   44.49    5.75
  -2 -14  -4   50.82    7.15
  -2 -14  -5  304.13   12.85
  -2 -14  -5  321.32   14.09
  -2 -14  -6   93.19    9.11
  -2 -14  -6  103.98    9.93
  -2 -14  -7  174.02   11.69
  -2 -14  -7  219.38   12.76
  -2 -14  -8   78.96   10.41
  -2 -14  -8   83.60    9.57
  -2 -14  -9  514.79   20.43
  -2 -14  -9  487.52   19.80
  -2 -14  -9  513.31   18.24
  -2 -14 -10  231.47   16.07
  -2 -14 -10  194.84   15.16
  -2 -14 -10  235.70   13.24
  -2 -14 -11  610.25   24.64
  -2 -14 -11  637.56   25.59
  -2 -14 -12  101.78   14.98
  -2 -14 -12   90.86   14.68
  -2 -14 -13   31.22   13.13
  -2 -14 -13    0.84   11.94
  -2 -14 -14  304.90   22.50
  -2 -14 -14  324.64   23.23
   2 -13 -14  513.64   28.91
   2 -13 -13   41.08   14.88
   2 -13 -12  854.56   32.88
   2 -13 -11  185.90   11.91
   2 -13 -11  160.47   16.85
   2 -13 -11  180.91   13.56
   2 -13 -10  235.01   17.64
   2 -13 -10  211.69   13.10
   2 -13 -10  191.70   12.25
   2 -13  -9  199.79   12.64
   2 -13  -9  179.44   15.37
   2 -13  -9  180.65   11.90
   2 -13  -8   31.36    7.69
   2 -13  -8   37.35   11.15
   2 -13  -7  159.55   13.64
   2 -13  -7  133.34   10.56
   2 -13  -6  762.34   20.67
  -2 -13   5  160.91    8.19
   2 -13  -5  147.56   10.22
  -2 -13   4  781.24   16.55
   2 -13  -4  789.72   20.07
   2 -13  -3  906.01   20.73
  -2 -13   3  851.97   17.66
   2 -13  -2    5.35    4.97
  -2 -13   2    5.85    4.62
   2 -13  -1 1412.43   24.34
  -2 -13   1 1338.25   22.88
  -2 -13   0 1033.94   20.44
   2 -13   0  977.69   19.81
   2 -13   1  480.67   13.79
  -2 -13  -1  471.49   14.70
   2 -13   2 2065.97   26.67
  -2 -13  -2 2069.20   30.02
  -2 -13  -3   73.76    7.52
   2 -13   3   75.67    6.36
   2 -13   4  948.88   17.19
  -2 -13  -4  962.78   21.73
  -2 -13  -4  925.53   18.57
  -2 -13  -5  219.81   10.84
  -2 -13  -5  213.26   11.50
  -2 -13  -6   18.86    6.57
  -2 -13  -6   13.43    6.15
  -2 -13  -7  260.84   12.89
  -2 -13  -7  260.35   13.43
  -2 -13  -8  481.02   16.57
  -2 -13  -8  514.03   18.65
  -2 -13  -9   22.01    9.19
  -2 -13  -9   23.53    8.64
  -2 -13  -9   28.21    7.66
  -2 -13 -10  735.72   24.96
  -2 -13 -10  750.46   20.31
  -2 -13 -10  693.83   24.04
  -2 -13 -11  147.37   14.87
  -2 -13 -11  171.47   15.05
  -2 -13 -12  151.27   15.89
  -2 -13 -12  150.15   16.12
  -2 -13 -13  293.71   20.62
  -2 -13 -13  301.62   21.10
  -2 -13 -14   71.71   15.78
  -2 -13 -14   58.66   14.45
   2 -12 -14  170.74   20.54
   2 -12 -13   32.50   14.03
   2 -12 -12   71.10   15.36
   2 -12 -12   70.46   11.26
   2 -12 -11  167.63   11.17
   2 -12 -11  189.17   17.21
   2 -12 -11  188.27   13.30
   2 -12 -10 1345.42   35.15
   2 -12 -10 1415.68   27.79
   2 -12 -10 1341.08   28.11
   2 -12  -9  135.06   10.32
   2 -12  -9  134.61   14.08
   2 -12  -9  144.69   10.64
   2 -12  -8 1007.82   23.72
   2 -12  -8  939.95   21.29
   2 -12  -8 1002.10   28.29
   2 -12  -7   71.07    7.87
   2 -12  -7   64.88   10.29
   2 -12  -6  319.17   13.41
   2 -12  -5   48.49    7.30
  -2 -12   5   40.67    5.03
   2 -12  -4  581.77   16.89
  -2 -12   4  590.02   13.70
   2 -12  -3   38.90    6.06
  -2 -12   3   36.46    5.14
   2 -12  -2 2615.69   32.27
  -2 -12   2 2670.52   29.48
  -2 -12   1  159.84    8.20
   2 -12  -1  179.13    9.29
  -2 -12   0 1869.29   26.22
   2 -12   0 1918.38   26.11
  -2 -12  -1  136.61    8.29
   2 -12   1  131.51    7.54
  -2 -12  -2   22.19    5.39
   2 -12   2   17.11    4.45
  -2 -12  -3   31.28    5.83
   2 -12   3   21.25    4.37
  -2 -12  -4 1504.37   25.95
  -2 -12  -4 1425.35   22.11
   2 -12   4 1516.78   20.08
  -2 -12  -5    3.84    5.20
  -2 -12  -5    7.30    5.75
  -2 -12  -6 2525.58   33.43
  -2 -12  -6 2481.79   33.96
  -2 -12  -7  220.95   12.03
  -2 -12  -7  211.35   11.43
  -2 -12  -8  671.34   18.57
  -2 -12  -8  713.74   20.92
  -2 -12  -9   12.79    8.04
  -2 -12  -9   14.55    6.36
  -2 -12  -9   20.44    8.81
  -2 -12 -10   17.06    8.95
  -2 -12 -10   21.52    6.41
  -2 -12 -10   22.22    9.90
  -2 -12 -11  261.32   17.24
  -2 -12 -11  277.48   17.72
  -2 -12 -12  566.64   24.61
  -2 -12 -12  574.52   24.56
  -2 -12 -13  135.82   16.34
  -2 -12 -13  109.11   15.63
  -2 -12 -14  564.24   27.29
  -2 -12 -14  553.08   27.44
  -2 -12 -15   24.04   13.84
  -2 -12 -15   13.53   15.80
   2 -11 -15  199.34   22.59
   2 -11 -14  520.88   28.68
   2 -11 -13   26.69   13.65
   2 -11 -12  904.17   32.42
   2 -11 -12 1020.49   27.60
   2 -11 -11   31.98    7.97
   2 -11 -11   12.94    6.39
   2 -11 -11   11.29   10.75
   2 -11 -10  172.21   10.92
   2 -11 -10  161.01   15.22
   2 -11 -10  184.89   12.00
   2 -11  -9  714.86   24.90
   2 -11  -9  757.35   19.87
   2 -11  -9  785.31   20.22
   2 -11  -8   72.15    7.72
   2 -11  -8   65.12    8.09
   2 -11  -8   63.52   10.82
   2 -11  -7  154.33   12.50
   2 -11  -7  153.25    9.96
   2 -11  -6 1825.67   29.00
   2 -11  -5   16.84    5.59
  -2 -11   5   19.77    4.11
   2 -11  -4  685.03   17.46
  -2 -11   4  672.62   13.83
   2 -11  -3   46.31    5.97
  -2 -11   3   42.79    4.89
   2 -11  -2   30.28    5.24
  -2 -11   2   38.70    4.92
  -2 -11   1  527.49   13.28
   2 -11  -1  537.66   14.07
   2 -11   0 1405.35   21.33
  -2 -11   0 1375.43   21.48
  -2 -11  -1   83.32    6.60
   2 -11   1   67.32    5.73
   2 -11   2 2745.59   27.16
  -2 -11  -2 2704.48   31.32
   2 -11   3  185.24    7.48
  -2 -11  -3  218.62    8.62
  -2 -11  -3  193.81    9.37
   2 -11   4 1128.91   16.12
  -2 -11  -4 1178.54   22.06
  -2 -11  -5  707.69   16.49
  -2 -11  -5  733.27   17.71
  -2 -11  -6   61.57    6.94
  -2 -11  -6   52.29    7.11
  -2 -11  -7  261.07   12.66
  -2 -11  -7  249.01   11.53
  -2 -11  -8 1274.29   23.67
  -2 -11  -8 1220.70   26.34
  -2 -11  -9  269.20   11.70
  -2 -11  -9  263.49   14.52
  -2 -11  -9  265.99   14.78
  -2 -11 -10  986.81   27.26
  -2 -11 -10 1015.53   20.68
  -2 -11 -10  984.22   27.22
  -2 -11 -11  306.26   17.95
  -2 -11 -11  306.05   17.78
  -2 -11 -12  200.77   17.10
  -2 -11 -12  225.74   16.98
  -2 -11 -13   48.47   12.55
  -2 -11 -13   30.03   12.13
  -2 -11 -14   61.59   13.60
  -2 -11 -14   29.74   13.17
  -2 -11 -15  153.89   18.40
  -2 -11 -15  230.35   21.08
   2 -10 -15  170.85   21.60
   2 -10 -14   70.81   15.46
   2 -10 -13  561.43   27.42
   2 -10 -12  176.20   17.10
   2 -10 -12  176.90   13.17
   2 -10 -11  603.97   20.29
   2 -10 -11  648.24   26.22
   2 -10 -11  659.23   16.96
   2 -10 -10  506.85   22.25
   2 -10 -10  466.05   17.09
   2 -10 -10  479.16   15.27
   2 -10  -9   97.80    9.01
   2 -10  -9   74.28   11.31
   2 -10  -9   88.74    8.13
   2 -10  -8  770.55   19.12
   2 -10  -8  770.08   23.98
   2 -10  -8  786.99   18.38
   2 -10  -7 1683.14   32.23
   2 -10  -7 1695.98   27.43
   2 -10  -6   41.19    6.50
  -2 -10   6   41.15    4.30
  -2 -10   5  392.93   10.12
   2 -10  -5  423.90   13.76
   2 -10  -4   25.24    5.34
  -2 -10   4   24.34    3.84
   2 -10  -3 1399.42   22.46
  -2 -10   3 1389.00   18.84
   2 -10  -2 2669.91   29.73
  -2 -10   2 2609.93   26.29
   2 -10  -1 1538.43   21.96
  -2 -10   1 1528.55   20.92
   2 -10   0   40.86    4.98
  -2 -10   0   37.89    4.91
   2 -10   1 1557.48   20.48
  -2 -10  -1 1485.29   21.71
   2 -10   2  655.74   12.79
  -2 -10  -2  617.28   14.65
  -2 -10  -3 3062.75   27.05
   2 -10   3 3224.52   26.55
  -2 -10  -3 3200.62   33.29
  -2 -10  -4  967.00   19.06
  -2 -10  -4  902.89   16.52
   2 -10   4  907.15   13.41
  -2 -10  -5  384.18   12.52
  -2 -10  -5  381.89   12.15
   2 -10   5  380.40    8.67
  -2 -10  -6  321.33   11.88
  -2 -10  -6  329.27   12.52
  -2 -10  -7   27.88    5.76
  -2 -10  -7   30.57    7.14
  -2 -10  -8  201.70   12.17
  -2 -10  -8  154.39   11.70
  -2 -10  -8  187.35    9.77
  -2 -10  -9 1017.65   25.63
  -2 -10  -9 1073.29   20.55
  -2 -10  -9  973.53   24.83
  -2 -10 -10   65.59   10.40
  -2 -10 -10   56.12    9.74
  -2 -10 -10   63.67    6.59
  -2 -10 -11  432.07   19.77
  -2 -10 -11  448.48   20.36
  -2 -10 -12  258.61   18.15
  -2 -10 -12  249.33   17.45
  -2 -10 -13   24.42   12.33
  -2 -10 -13   37.50   11.87
  -2 -10 -14  249.87   20.53
  -2 -10 -14  231.02   18.66
  -2 -10 -15  205.82   20.23
  -2 -10 -15  249.09   21.75
   2  -9 -15  774.06   34.24
   2  -9 -14   28.49   14.65
   2  -9 -13    1.58   12.06
   2  -9 -13   26.76    9.56
   2  -9 -12   44.05    9.18
   2  -9 -12   51.93   13.64
   2  -9 -11  481.18   23.00
   2  -9 -11  515.69   18.51
   2  -9 -10   64.63    7.11
   2  -9 -10   64.31   11.53
   2  -9 -10   52.28    8.23
   2  -9  -9 1962.47   37.69
   2  -9  -9 1907.05   27.92
   2  -9  -9 1838.99   28.97
   2  -9  -8   20.39    8.58
   2  -9  -8   34.12    6.27
   2  -9  -8   31.42    5.93
   2  -9  -7 1915.80   28.04
   2  -9  -7 1814.33   24.63
   2  -9  -7 1895.74   33.37
  -2  -9   6   46.16    4.18
   2  -9  -6   40.20    5.92
  -2  -9   5  151.51    6.27
   2  -9  -5  147.20    8.51
   2  -9  -4  216.19    9.56
  -2  -9   4  204.88    7.25
  -2  -9   3  813.45   13.82
   2  -9  -3  778.95   16.36
  -2  -9   2   34.32    4.10
   2  -9  -2   42.56    5.27
   2  -9  -1 4566.72   35.85
  -2  -9   1 4713.96   34.41
   2  -9   0   53.91    5.05
  -2  -9   0   53.60    4.95
   2  -9   1  839.88   14.26
  -2  -9  -1  803.99   15.35
  -2  -9  -2   96.82    6.44
   2  -9   2  103.78    5.39
  -2  -9  -3 1284.19   20.33
  -2  -9  -3 1287.43   17.03
   2  -9   3 1274.77   15.57
  -2  -9  -4  101.62    6.48
  -2  -9  -4  120.34    7.28
   2  -9   4  118.20    4.97
  -2  -9  -5 1924.80   25.46
  -2  -9  -5 1887.89   24.85
   2  -9   5 1898.85   16.81
  -2  -9  -6  558.76   14.45
  -2  -9  -6  528.40   14.97
  -2  -9  -7 2899.14   35.67
  -2  -9  -7 2997.27   32.30
  -2  -9  -8   71.49    8.59
  -2  -9  -8   79.44    6.80
  -2  -9  -8   76.91    9.03
  -2  -9  -9  170.46   12.04
  -2  -9  -9  173.40    8.88
  -2  -9  -9  153.37   11.47
  -2  -9 -10  141.67   12.35
  -2  -9 -10  166.41    8.21
  -2  -9 -10  139.02   11.97
  -2  -9 -11  404.43   19.53
  -2  -9 -11  461.64   20.19
  -2  -9 -12    9.06    9.51
  -2  -9 -12   -4.86   10.08
  -2  -9 -13  545.27   24.34
  -2  -9 -13  491.00   24.28
  -2  -9 -14   60.62   13.88
  -2  -9 -14   56.76   13.50
  -2  -9 -15  554.61   28.53
  -2  -9 -15  494.32   27.12
  -2  -9 -16   37.73   16.76
   2  -8 -15  325.45   24.43
   2  -8 -14   22.06   14.42
   2  -8 -13  651.81   28.64
   2  -8 -13  663.42   22.97
   2  -8 -12  100.65   11.08
   2  -8 -12   81.79   13.42
   2  -8 -11  666.73   20.42
   2  -8 -11  632.63   24.93
   2  -8 -10  456.73   20.43
   2  -8 -10  452.40   13.21
   2  -8 -10  417.17   15.65
   2  -8  -9   28.70    6.51
   2  -8  -9   37.14    9.57
   2  -8  -9   25.98    5.53
   2  -8  -8   43.53    8.97
   2  -8  -8   28.91    5.54
   2  -8  -8   32.77    5.92
   2  -8  -7  987.28   24.18
   2  -8  -7  997.87   19.39
   2  -8  -7 1019.88   18.38
   2  -8  -6   39.38    5.81
   2  -8  -6   50.79    8.59
  -2  -8   6   51.34    4.02
  -2  -8   5 2329.07   21.11
   2  -8  -5 2332.88   27.96
  -2  -8   4  731.52   12.13
   2  -8  -4  713.62   15.46
  -2  -8   3  539.48   10.74
   2  -8  -3  505.56   12.86
  -2  -8   2  724.84   12.66
   2  -8  -2  713.83   14.33
   2  -8  -1   44.91    4.37
  -2  -8   1   50.58    4.49
   2  -8   0 1972.50   21.32
  -2  -8   0 2010.52   22.11
  -2  -8  -1 2856.41   26.74
   2  -8   1 2700.94   23.70
  -2  -8  -2  126.44    6.76
   2  -8   2  112.04    5.20
   2  -8   3 2412.66   19.72
  -2  -8  -3 2323.83   21.86
  -2  -8  -3 2419.78   26.29
   2  -8   4   72.57    3.70
  -2  -8  -4   90.88    6.29
  -2  -8  -4   71.91    5.73
   2  -8   5  231.66    5.55
  -2  -8  -5  218.33    8.71
  -2  -8  -5  210.17    9.03
  -2  -8  -6  468.37   13.79
  -2  -8  -6  481.26   12.70
  -2  -8  -7  530.63   13.36
  -2  -8  -7  555.44   16.24
  -2  -8  -8  109.83    9.50
  -2  -8  -8  119.16    7.09
  -2  -8  -8  110.84    9.54
  -2  -8  -9 1726.37   31.89
  -2  -8  -9 1700.44   21.93
  -2  -8  -9 1817.03   32.52
  -2  -8 -10   33.64    8.69
  -2  -8 -10   44.96    9.12
  -2  -8 -11  813.87   25.87
  -2  -8 -11  761.19   24.82
  -2  -8 -12  352.16   19.54
  -2  -8 -12  374.19   19.57
  -2  -8 -13   32.75   11.74
  -2  -8 -13   44.13   11.93
  -2  -8 -14  101.43   15.46
  -2  -8 -14  118.99   15.94
  -2  -8 -15  241.73   21.39
  -2  -8 -15  214.44   19.54
  -2  -8 -16   66.22   16.82
  -2  -8 -16   37.20   15.17
   2  -7 -16   14.66   16.49
   2  -7 -15  112.57   18.39
   2  -7 -14  849.37   27.39
   2  -7 -14  817.77   33.16
   2  -7 -13   -0.20    8.91
   2  -7 -13  -19.13   12.82
   2  -7 -12 1085.40   27.05
   2  -7 -12 1069.17   32.71
   2  -7 -11  251.23   17.02
   2  -7 -11  263.40   13.74
   2  -7 -10  555.79   13.01
   2  -7 -10  561.20   17.30
   2  -7 -10  549.79   21.75
   2  -7  -9  750.34   23.47
   2  -7  -9  708.08   18.02
   2  -7  -9  762.41   16.08
   2  -7  -8   28.73    8.31
   2  -7  -8   27.10    5.06
   2  -7  -8   41.12    6.06
   2  -7  -7  472.39   17.08
   2  -7  -7  491.83   13.30
  -2  -7   7  434.17    9.32
   2  -7  -7  474.07   12.54
   2  -7  -6 2311.34   23.98
   2  -7  -6 2463.76   28.55
  -2  -7   6 2424.25   21.04
   2  -7  -6 2465.81   33.71
  -2  -7   5  164.87    5.99
   2  -7  -5  144.18    7.56
   2  -7  -4  416.51   11.49
  -2  -7   4  433.46    9.03
  -2  -7   3  873.18   12.77
   2  -7  -3  869.55   15.74
   2  -7  -2  142.34    6.79
  -2  -7   2  148.93    5.84
   2  -7  -1  865.25   14.27
  -2  -7   1  859.00   13.42
  -2  -7   0 1816.50   19.79
   2  -7   0 1761.55   19.27
   2  -7   1  512.12   10.02
  -2  -7  -1  496.24   10.97
   2  -7   2 5399.66   29.20
  -2  -7  -2 5378.50   27.39
  -2  -7  -2 5425.20   35.93
  -2  -7  -3   60.36    4.95
   2  -7   3   65.21    3.60
  -2  -7  -3   60.26    4.49
   2  -7   4  504.76    7.61
  -2  -7  -4  519.07   11.63
  -2  -7  -4  484.98   11.62
  -2  -7  -5  369.92   11.13
   2  -7   5  383.98    6.01
  -2  -7  -5  380.05   10.46
  -2  -7  -6  275.79    9.34
  -2  -7  -6  282.19   10.95
  -2  -7  -7  709.78   14.16
  -2  -7  -7  727.78   17.96
  -2  -7  -7  762.49   18.58
  -2  -7  -8 1618.80   28.45
  -2  -7  -8 1684.07   21.06
  -2  -7  -8 1622.09   28.38
  -2  -7  -9  121.24    6.15
  -2  -7  -9  108.41    9.96
  -2  -7 -10  970.25   25.82
  -2  -7 -10 1005.95   26.13
  -2  -7 -11  182.57   13.79
  -2  -7 -11  163.28   13.78
  -2  -7 -12  217.58   15.62
  -2  -7 -12  190.94   15.62
  -2  -7 -13  547.45   24.33
  -2  -7 -13  597.04   25.22
  -2  -7 -14    7.74   11.71
  -2  -7 -14    6.03   12.06
  -2  -7 -15  183.48   18.82
  -2  -7 -15  213.34   20.01
  -2  -7 -16  628.52   31.36
  -2  -7 -16  576.71   29.52
   2  -6 -16  988.35   39.24
   2  -6 -15   12.72   14.03
   2  -6 -14  181.09   15.21
   2  -6 -14  180.08   18.59
   2  -6 -13   40.45    9.75
   2  -6 -13   36.77   12.78
   2  -6 -12    5.68    7.61
   2  -6 -12   11.95   10.63
   2  -6 -11  134.98   10.71
   2  -6 -11  149.20   13.81
   2  -6 -10 1373.65   25.93
   2  -6 -10 1426.26   17.23
   2  -6 -10 1455.91   33.14
   2  -6  -9   88.04   10.52
   2  -6  -9   95.55    8.23
   2  -6  -9   89.16    6.13
   2  -6  -8 1915.06   23.84
   2  -6  -8 1957.00   33.68
   2  -6  -8 1963.82   26.50
   2  -6  -7  220.21    8.91
  -2  -6   7  232.22    6.91
   2  -6  -7  241.81   12.95
   2  -6  -7  243.49    9.33
   2  -6  -6   74.55    5.47
   2  -6  -6   62.08    7.98
  -2  -6   6   72.27    4.14
   2  -6  -6   76.67    5.98
   2  -6  -5   48.40    4.97
  -2  -6   5   45.53    3.62
  -2  -6   4 1604.53   16.24
   2  -6  -4 1613.11   20.88
   2  -6  -3  353.92    9.86
  -2  -6   3  350.77    7.89
   2  -6  -2 7276.59   40.72
  -2  -6   2 7284.59   34.88
   2  -6  -1  513.43   10.66
  -2  -6   1  485.39    9.73
   2  -6   0 3145.07   24.06
  -2  -6   0 3104.71   24.31
  -2  -6  -1  106.86    5.43
   2  -6   1  105.88    4.84
   2  -6   2  393.75    7.63
  -2  -6  -2  397.85    7.36
  -2  -6  -2  424.78    9.92
   2  -6   3  217.05    5.24
  -2  -6  -3  222.89    7.65
  -2  -6  -3  239.11    6.98
   2  -6   4 1156.24   10.09
  -2  -6  -4 1175.11   16.46
  -2  -6  -4 1156.31   16.49
  -2  -6  -5   66.31    4.94
  -2  -6  -5   74.02    6.00
   2  -6   5   72.73    2.45
  -2  -6  -6 2888.20   26.21
  -2  -6  -6 2905.40   31.30
  -2  -6  -6 2846.36   31.12
  -2  -6  -7    9.09    5.60
  -2  -6  -7   11.04    3.52
  -2  -6  -7   12.05    5.71
  -2  -6  -8  670.70   18.63
  -2  -6  -8  647.83   11.94
  -2  -6  -8  605.29   17.69
  -2  -6  -9  195.11   12.08
  -2  -6  -9  189.65   11.92
  -2  -6  -9  190.00    5.89
  -2  -6 -10   47.35    9.36
  -2  -6 -10   36.06    8.63
  -2  -6 -11  113.40   12.41
  -2  -6 -11  102.16   11.20
  -2  -6 -12 1485.63   35.69
  -2  -6 -12 1548.25   36.01
  -2  -6 -13  120.39   15.11
  -2  -6 -13  103.03   13.99
  -2  -6 -14  674.42   28.63
  -2  -6 -14  754.18   29.21
  -2  -6 -15   89.89   15.50
  -2  -6 -15   98.93   17.06
  -2  -6 -16  205.85   20.42
  -2  -6 -16  230.39   21.97
   2  -5 -16   69.15   16.77
   2  -5 -15  121.66   18.29
   2  -5 -14  729.20   25.62
   2  -5 -14  725.94   30.31
   2  -5 -13   13.45    8.91
   2  -5 -13   23.36   11.89
   2  -5 -12  641.39   25.36
   2  -5 -12  627.21   20.91
   2  -5 -11  491.18   17.43
   2  -5 -11  445.49   20.63
   2  -5 -10  202.85   11.19
   2  -5 -10  230.92   15.00
   2  -5  -9  347.22   16.35
   2  -5  -9  340.10   12.67
   2  -5  -9  367.10    9.27
   2  -5  -8  914.04   23.22
   2  -5  -8  905.72   15.31
   2  -5  -8  839.76   17.36
  -2  -5   7 1219.82   14.40
   2  -5  -7 1204.76   17.95
   2  -5  -7 1253.99   24.92
   2  -5  -7 1209.10   18.93
   2  -5  -6 2467.26   25.43
   2  -5  -6 2358.53   31.78
  -2  -5   6 2414.57   19.66
   2  -5  -6 2488.10   23.96
   2  -5  -5   14.48    3.68
  -2  -5   5   15.21    2.76
   2  -5  -5   23.99    6.04
   2  -5  -5   20.49    3.42
   2  -5  -4 3223.62   28.40
  -2  -5   4 3295.76   22.54
   2  -5  -3  369.29    9.70
  -2  -5   3  380.72    7.92
   2  -5  -2  940.32   13.74
  -2  -5   2  875.98   11.76
   2  -5  -2  916.74   14.10
   2  -5  -1  189.84    6.57
  -2  -5   1  200.21    6.16
   2  -5   0  906.83   12.40
  -2  -5   0  892.20   12.55
   2  -5   1  210.19    5.81
  -2  -5  -1  204.89    4.06
  -2  -5  -1  219.61    6.79
  -2  -5  -2 2576.29   17.00
   2  -5   2 2512.97   17.27
  -2  -5  -2 2511.18   21.97
  -2  -5  -3  716.18   10.94
   2  -5   3  684.38    8.22
  -2  -5  -3  687.87   11.91
   2  -5   4  937.29    8.10
  -2  -5  -4  896.91   13.59
  -2  -5  -4  934.34   14.37
   2  -5   5  593.47    5.07
  -2  -5  -5  568.33   11.06
  -2  -5  -5  578.77   13.05
  -2  -5  -6  302.54    8.19
  -2  -5  -6  308.80   11.12
  -2  -5  -6  296.43   10.87
  -2  -5  -7 1688.96   26.27
  -2  -5  -7 1728.72   18.05
  -2  -5  -7 1670.73   25.98
  -2  -5  -8 1723.87   15.90
  -2  -5  -8 1688.30   28.46
  -2  -5  -8 1679.80   28.50
  -2  -5  -9   63.77    8.92
  -2  -5  -9   54.29    8.21
  -2  -5 -10 1648.50   32.80
  -2  -5 -10 1714.09   32.67
  -2  -5 -11    5.42    7.92
  -2  -5 -11   15.42    7.87
  -2  -5 -12  530.80   22.06
  -2  -5 -12  496.13   22.32
  -2  -5 -13  321.18   20.33
  -2  -5 -13  411.05   20.95
  -2  -5 -14   41.26   12.14
  -2  -5 -14   58.46   13.26
  -2  -5 -15   33.34   12.96
  -2  -5 -15   30.74   14.24
  -2  -5 -16  312.25   24.41
  -2  -5 -16  325.60   24.17
   2  -4 -16  375.32   26.04
   2  -4 -15  161.09   18.64
   2  -4 -14   41.55   10.87
   2  -4 -14   57.55   14.09
   2  -4 -13  510.23   20.58
   2  -4 -13  536.00   24.78
   2  -4 -12   22.95    8.08
   2  -4 -12   40.94   11.27
   2  -4 -11  750.47   25.24
   2  -4 -11  758.95   21.05
   2  -4 -10  311.17   13.27
   2  -4 -10  332.77   16.69
   2  -4  -9  175.24   12.41
   2  -4  -9  163.91    5.25
   2  -4  -9  151.01    9.23
   2  -4  -8  510.78   10.43
   2  -4  -8  545.73   14.28
  -2  -4   8  511.66   10.10
   2  -4  -8  571.21   18.67
   2  -4  -7  526.27   12.68
  -2  -4   7  522.47    9.61
   2  -4  -7  581.26   17.20
   2  -4  -7  522.33   11.18
   2  -4  -6  211.28    7.61
  -2  -4   6  203.19    5.95
   2  -4  -6  211.13   10.73
   2  -4  -6  196.07    7.42
  -2  -4   5 5218.38   27.81
   2  -4  -5 5470.31   42.96
   2  -4  -5 5282.05   34.61
   2  -4  -5 5313.71   30.59
   2  -4  -4 1352.26   13.44
  -2  -4   4 1374.16   14.41
   2  -4  -4 1364.04   17.59
   2  -4  -3 1153.30   15.89
  -2  -4   3 1159.69   13.04
   2  -4  -2  121.34    5.37
   2  -4  -2  134.15    5.74
  -2  -4   2  122.13    4.83
   2  -4  -1   96.35    4.92
  -2  -4   1  105.97    4.59
  -2  -4   0 6401.13   31.08
   2  -4   0 6479.69   30.98
   2  -4   1 3741.37   21.94
  -2  -4  -1 3761.53   13.90
  -2  -4  -1 3788.28   24.37
  -2  -4  -2 2119.60   14.82
   2  -4   2 2138.32   14.89
  -2  -4  -2 2103.59   18.69
  -2  -4  -3 3634.30   24.80
   2  -4   3 3674.85   17.14
  -2  -4  -3 3719.13   24.06
  -2  -4  -4   76.96    4.38
   2  -4   4   83.50    2.46
  -2  -4  -4   63.31    4.86
   2  -4   5  613.14    4.80
  -2  -4  -5  621.51   13.41
  -2  -4  -5  610.16   10.42
  -2  -4  -5  676.81   14.21
  -2  -4  -6 1291.90   21.04
  -2  -4  -6 1287.20   14.33
  -2  -4  -6 1253.70   20.66
  -2  -4  -7 1135.70   21.52
  -2  -4  -7 1107.96   12.18
  -2  -4  -7 1105.88   21.43
  -2  -4  -8  397.75   14.48
  -2  -4  -8  391.46   14.59
  -2  -4  -9  705.51   20.02
  -2  -4  -9  750.96   20.95
  -2  -4 -10  304.40   15.00
  -2  -4 -10  275.21   14.68
  -2  -4 -11  935.68   26.24
  -2  -4 -11  993.74   27.90
  -2  -4 -12  393.01   19.42
  -2  -4 -12  315.53   18.50
  -2  -4 -13   -4.34   10.13
  -2  -4 -13   10.14   11.25
  -2  -4 -14  543.02   25.21
  -2  -4 -14  531.69   26.11
  -2  -4 -15  394.68   24.75
  -2  -4 -15  398.14   23.91
  -2  -4 -16  123.03   18.80
  -2  -4 -16  140.84   18.52
   2  -3 -16   46.31   16.15
   2  -3 -15  467.62   26.61
   2  -3 -15  418.68   22.33
   2  -3 -14  119.75   13.34
   2  -3 -14  109.89   15.80
   2  -3 -13   16.30    8.45
   2  -3 -13   23.17   11.75
   2  -3 -12    3.79    9.26
   2  -3 -12   11.68    7.84
   2  -3 -11 1230.72   26.66
   2  -3 -11 1166.07   30.61
   2  -3 -10    6.88    6.18
   2  -3 -10   12.43    8.99
   2  -3  -9 2876.66   34.20
   2  -3  -9 2914.21   41.42
   2  -3  -8  224.22    9.80
  -2  -3   8  222.05    6.90
   2  -3  -8  224.14    5.91
   2  -3  -8  231.30   12.62
  -2  -3   7 1871.53   17.57
   2  -3  -7 1821.81   28.81
   2  -3  -7 1823.64   22.89
   2  -3  -7 1873.78   18.43
   2  -3  -6  308.79    8.95
   2  -3  -6  302.17   11.74
   2  -3  -6  293.51    8.08
  -2  -3   6  302.10    7.13
   2  -3  -5   55.71    6.08
  -2  -3   5   65.44    3.64
   2  -3  -5   69.57    4.46
   2  -3  -5   69.67    4.61
  -2  -3   4  382.48    7.53
   2  -3  -4  374.45    9.03
   2  -3  -4  367.30    7.22
   2  -3  -3 2981.83   23.79
  -2  -3   3 2955.41   20.01
   2  -3  -3 2882.37   15.84
   2  -3  -2  552.44    9.36
  -2  -3   2  561.96    8.93
   2  -3  -2  590.62   10.50
  -2  -3   1 1783.72   15.31
   2  -3  -1 1704.08   16.68
   2  -3   0  446.90    8.22
  -2  -3   0  465.84    8.24
  -2  -3  -1  226.22    3.62
   2  -3   1  222.60    5.59
  -2  -3  -1  220.12    5.96
  -2  -3  -2   28.76    2.82
   2  -3   2   26.73    2.52
  -2  -3  -2   21.89    2.93
  -2  -3  -3 1835.01   16.27
  -2  -3  -3 1786.66   16.82
   2  -3   3 1761.06   11.92
  -2  -3  -4  519.91    8.90
  -2  -3  -4  525.49   10.96
   2  -3   4  559.84    6.02
  -2  -3  -4  548.07   11.48
   2  -3   5 5493.86   16.63
  -2  -3  -5 5354.54   26.69
  -2  -3  -5 5456.91   38.37
  -2  -3  -5 5467.56   38.53
  -2  -3  -6  602.52    8.37
   2  -3   6  590.95    5.82
  -2  -3  -6  569.51   14.42
  -2  -3  -6  599.76   14.68
  -2  -3  -7 2910.79   34.11
   2  -3   7 2901.26   14.56
  -2  -3  -7 2945.93   34.21
  -2  -3  -8   79.10    8.38
  -2  -3  -8   90.06    8.48
  -2  -3  -9  348.50   15.22
  -2  -3  -9  353.65   14.84
  -2  -3 -10   23.90    8.06
  -2  -3 -10   39.24    8.48
  -2  -3 -11  380.46   18.48
  -2  -3 -11  364.70   17.37
  -2  -3 -12   26.37   10.16
  -2  -3 -12   31.22    9.27
  -2  -3 -13 1333.29   36.46
  -2  -3 -13 1400.55   35.73
  -2  -3 -14   63.36   13.41
  -2  -3 -14   46.93   13.81
  -2  -3 -15  456.58   25.45
  -2  -3 -15  436.71   25.71
  -2  -3 -16   79.91   17.13
  -2  -3 -16   80.26   16.21
   2  -2 -16   99.35   17.60
   2  -2 -15   49.04   14.45
   2  -2 -15   67.15   12.84
   2  -2 -14  273.30   20.47
   2  -2 -14  284.96   18.05
   2  -2 -13  965.27   31.66
   2  -2 -13  961.39   27.53
   2  -2 -12  129.27   11.88
   2  -2 -12  113.53   13.92
   2  -2 -11  169.33   11.54
   2  -2 -11  147.06   13.08
   2  -2 -10  214.66   11.79
   2  -2 -10  191.38   13.52
   2  -2  -9   25.24    5.97
   2  -2  -9   32.20    8.15
   2  -2  -8  563.58   17.66
  -2  -2   8  643.23   11.62
   2  -2  -8  591.42   14.82
   2  -2  -7 3952.96   22.00
   2  -2  -7 3956.71   33.50
  -2  -2   7 3968.94   26.28
   2  -2  -7 3913.60   40.99
   2  -2  -6   25.28    4.13
  -2  -2   6   24.81    3.12
   2  -2  -6   22.30    6.02
   2  -2  -6   22.26    2.93
   2  -2  -5 4374.82   36.56
   2  -2  -5 4397.71   27.36
  -2  -2   5 4348.48   25.04
   2  -2  -5 4361.74   27.88
   2  -2  -4  424.35    7.66
  -2  -2   4  432.31    8.09
   2  -2  -4  436.04    9.11
   2  -2  -4  448.15   11.31
  -2  -2   3 2944.23   19.66
   2  -2  -3 2963.76   22.65
   2  -2  -3 2979.88   15.97
   2  -2  -2 6015.02   31.08
  -2  -2   2 5961.75   27.44
   2  -2  -2 5891.04   15.52
   2  -2  -2 5741.47   27.27
   2  -2  -1  101.04    4.62
  -2  -2   1   88.51    4.08
  -2  -2   0  536.58    8.25
   2  -2   0  540.60    8.69
  -2  -2  -1 2121.99   16.08
   2  -2   1 2066.39   15.51
  -2  -2  -1 2122.82   11.68
  -2  -2  -2 4992.34   23.48
   2  -2   2 5005.12   22.26
  -2  -2  -2 5045.19   24.54
   2  -2   3 1665.02   12.00
  -2  -2  -3 1612.38   13.77
  -2  -2  -3 1664.69   16.80
  -2  -2  -3 1661.52   16.51
  -2  -2  -4  616.72    8.30
   2  -2   4  641.35    7.16
  -2  -2  -4  607.72   11.89
  -2  -2  -4  598.71   11.71
  -2  -2  -5  222.41    8.61
  -2  -2  -5  215.83    4.61
   2  -2   5  227.80    4.51
  -2  -2  -5  228.46    8.57
   2  -2   6  169.70    4.18
  -2  -2  -6  160.11    8.59
  -2  -2  -6  150.10    8.34
  -2  -2  -7  367.93   12.98
  -2  -2  -7  332.30   12.49
   2  -2   7  364.34    6.28
  -2  -2  -8   96.26    8.61
  -2  -2  -8   98.91    8.99
  -2  -2  -9 2779.38   38.44
  -2  -2  -9 2869.29   39.87
  -2  -2 -10  121.68   11.40
  -2  -2 -10  153.64   11.42
  -2  -2 -11  727.42   23.40
  -2  -2 -11  740.50   24.35
  -2  -2 -12  387.25   19.08
  -2  -2 -12  402.91   20.53
  -2  -2 -13   56.08   11.73
  -2  -2 -13   50.29   12.63
  -2  -2 -14  335.63   20.96
  -2  -2 -14  329.25   21.74
  -2  -2 -15  302.93   22.73
  -2  -2 -15  260.87   20.80
  -2  -2 -16  117.59   18.41
  -2  -2 -16  135.47   17.89
   2  -1 -16   59.78   16.24
   2  -1 -15  132.45   15.54
   2  -1 -15  106.16   16.07
   2  -1 -14  382.54   20.37
   2  -1 -14  406.88   23.11
   2  -1 -13    2.33    8.97
   2  -1 -13   -4.87   10.42
   2  -1 -12 1382.47   34.93
   2  -1 -12 1399.14   30.98
   2  -1 -11   96.61   11.54
   2  -1 -11   94.03    9.88
   2  -1 -10  274.28   13.33
   2  -1 -10  269.38   15.04
  -2  -1   9  981.18   15.76
   2  -1  -9  988.36   24.26
   2  -1  -9 1008.91   21.39
  -2  -1   8  437.71   10.14
   2  -1  -8  427.85   15.51
   2  -1  -8  448.48   13.45
   2  -1  -7  182.75    8.47
  -2  -1   7  168.62    6.36
   2  -1  -7  172.53    3.06
   2  -1  -7  178.55   10.10
   2  -1  -7  142.06    3.00
   2  -1  -6 1734.77   13.80
   2  -1  -6 1786.13   25.43
  -2  -1   6 1705.68   17.21
   2  -1  -6 1751.92   20.76
  -2  -1   5  356.99    7.67
   2  -1  -5  384.86   11.28
   2  -1  -5  377.88    8.85
   2  -1  -5  398.75    7.59
  -2  -1   4 4929.20   26.07
   2  -1  -4 5058.66   26.21
   2  -1  -4 4878.80   34.22
   2  -1  -4 5067.20   27.29
   2  -1  -3 1051.45    9.83
   2  -1  -3 1009.55   13.94
  -2  -1   3  974.30   11.74
   2  -1  -3  959.77   12.20
   2  -1  -2   10.92    2.63
   2  -1  -2   11.39    1.48
  -2  -1   2   13.45    2.83
   2  -1  -2   10.33    2.96
  -2  -1   1 3062.14   19.50
   2  -1  -1 3197.07   21.06
  -2  -1   0 1080.72   11.14
   2  -1   0 1034.10   11.84
   2  -1   1  140.95    4.73
  -2  -1  -1  143.62    4.46
  -2  -1  -2 2072.94   16.31
  -2  -1  -2 2029.89   14.40
  -2  -1  -2 2139.05   16.41
   2  -1   2 2102.04   15.15
  -2  -1  -3   87.57    3.24
  -2  -1  -3   87.98    4.82
   2  -1   3   80.53    3.37
  -2  -1  -3   88.05    4.87
  -2  -1  -4 2511.98   23.86
  -2  -1  -4 2427.54   14.05
  -2  -1  -4 2466.19   13.04
   2  -1   4 2417.06   15.56
  -2  -1  -4 2463.72   23.52
   2  -1   5 2817.51   17.18
  -2  -1  -5 2723.20   27.95
  -2  -1  -5 2753.17   27.80
  -2  -1  -6  680.37   15.82
  -2  -1  -6  720.98   15.94
   2  -1   6  756.82    9.30
   2  -1   7  137.35    4.68
  -2  -1  -7  119.76    8.29
   2  -1   8 1257.51   13.78
  -2  -1  -8 1304.15   25.70
  -2  -1  -8 1308.87   25.03
  -2  -1  -9  120.43   10.20
  -2  -1  -9  140.58   10.93
  -2  -1 -10 2389.73   39.62
  -2  -1 -10 2439.90   38.63
  -2  -1 -11  550.07   21.43
  -2  -1 -11  549.18   20.71
  -2  -1 -12  591.43   22.92
  -2  -1 -12  519.89   22.35
  -2  -1 -13  378.27   21.27
  -2  -1 -13  392.44   20.99
  -2  -1 -14   45.05   12.44
  -2  -1 -14   63.44   14.17
  -2  -1 -15  164.89   18.89
  -2  -1 -15  155.98   17.23
  -2  -1 -16  345.16   24.49
  -2  -1 -16  348.41   25.24
   2   0 -16  417.81   26.46
   2   0 -15   -0.99   13.01
   2   0 -15   -0.21   11.95
   2   0 -14  450.87   24.17
   2   0 -14  478.46   22.43
   2   0 -13   75.98   11.45
   2   0 -13   50.99   11.79
   2   0 -12  418.73   18.20
   2   0 -12  396.00   19.69
   2   0 -11   21.49    7.80
   2   0 -11   28.08    9.28
   2   0 -10 1506.38   31.36
   2   0 -10 1441.03   27.85
  -2   0   9   33.88    4.73
   2   0  -9   42.15    6.75
   2   0  -9   25.06    7.30
   2   0  -8 1972.91   27.55
  -2   0   8 1997.97   21.67
   2   0  -8 1899.18   30.35
  -2   0   7    1.32    2.97
   2   0  -7   -2.31    4.37
   2   0  -7   -1.49    5.23
   2   0  -6  255.59    3.67
   2   0  -6  266.21   10.42
  -2   0   6  253.39    7.34
   2   0  -6  274.05    9.17
   2   0  -5    3.65    1.79
  -2   0   5    1.02    2.39
   2   0  -5    2.49    3.16
   2   0  -5    3.85    4.04
   2   0  -4 1888.44   17.30
   2   0  -4 1824.62   14.74
  -2   0   4 1898.61   16.83
   2   0  -4 1859.13   20.48
   2   0  -3    7.87    3.53
   2   0  -3    4.83    2.39
   2   0  -3    3.09    2.29
  -2   0   3    2.02    2.32
   2   0  -2 6715.82   21.64
   2   0  -2 6685.08   25.57
   2   0  -2 6613.61   29.37
  -2   0   2 6647.00   29.29
  -2   0   1  273.95    6.16
   2   0  -1  283.75    6.36
  -2   0   0 5258.90   23.96
   2   0   0 5413.62   25.50
  -2   0  -1  188.19    4.31
   2   0   1  173.80    5.05
  -2   0  -1  182.19    4.50
   2   0   2    9.50    2.50
  -2   0  -2    7.21    1.77
  -2   0  -2    8.69    2.70
  -2   0  -3   11.33    1.49
  -2   0  -3   13.17    1.80
  -2   0  -3   14.06    3.61
   2   0   3    7.78    2.21
  -2   0  -3   15.61    3.44
   2   0   4 1990.99   15.13
  -2   0  -4 1929.62   21.72
  -2   0  -4 1996.56   21.31
   2   0   5    4.61    2.11
  -2   0  -5    1.77    4.31
  -2   0  -5    3.88    4.02
   2   0   6 2633.67   18.86
  -2   0  -6 2698.95   31.03
  -2   0  -6 2614.39   29.96
  -2   0  -7   25.10    5.81
   2   0   7   19.73    2.80
  -2   0  -7   14.57    6.02
   2   0   8  772.63   11.81
  -2   0  -8  802.54   20.67
  -2   0  -8  780.98   19.66
  -2   0  -9   52.43    8.26
  -2   0  -9   69.10    9.33
  -2   0 -10  184.03   12.53
  -2   0 -10  212.44   13.95
  -2   0 -11   16.64    8.89
  -2   0 -11    0.42    8.33
  -2   0 -12  809.98   26.66
  -2   0 -12  858.04   28.06
  -2   0 -13  151.98   16.00
  -2   0 -13  164.55   15.00
  -2   0 -14 1659.06   42.09
  -2   0 -14 1593.83   42.46
  -2   0 -15   12.11   11.95
  -2   0 -15   -1.61   14.70
  -2   0 -16   69.80   16.22
  -2   0 -16   81.94   17.42
   2   1 -16   43.79   13.48
   2   1 -16   48.67   14.71
   2   1 -15  159.14   16.89
   2   1 -15  129.86   17.01
   2   1 -14  361.76   22.42
   2   1 -14  462.53   22.62
   2   1 -13   22.31   10.14
   2   1 -13   -2.81   10.53
   2   1 -12 1399.38   32.26
   2   1 -12 1418.86   34.84
   2   1 -11   95.93   10.54
   2   1 -11   84.96   11.08
   2   1 -10  282.30   14.02
  -2   1  10  239.65    9.52
   2   1 -10  244.76   14.17
  -2   1   9  990.39   16.93
   2   1  -9 1058.50   24.64
   2   1  -9 1008.21   22.40
  -2   1   8  426.56   10.75
   2   1  -8  447.66   14.36
   2   1  -8  395.93   14.73
  -2   1   7  179.13    7.00
   2   1  -7  169.60    8.82
   2   1  -7  160.90    9.35
   2   1  -6 1734.10   22.52
  -2   1   6 1808.25   19.20
   2   1  -6 1708.65   24.02
  -2   1   5  365.59    8.57
   2   1  -5  363.47    9.80
   2   1  -5  358.50   10.41
   2   1  -5  382.92    4.53
   2   1  -4 4883.73   30.46
   2   1  -4 4882.48   32.34
  -2   1   4 4842.50   28.20
   2   1  -4 4911.62   20.70
   2   1  -3  989.80   12.96
  -2   1   3  976.81   12.21
   2   1  -3  964.96   12.09
   2   1  -3  973.37   10.31
   2   1  -2   13.74    2.49
   2   1  -2   10.48    2.56
  -2   1   2    7.63    2.51
   2   1  -2    9.51    2.78
   2   1  -1 3152.78   19.57
  -2   1   1 3112.21   19.98
   2   1   0 1081.04   11.65
  -2   1   0 1055.35   11.13
  -2   1   0 1080.03    7.24
   2   1   1  141.32    4.67
  -2   1  -1  145.79    4.05
  -2   1  -1  144.82    4.17
  -2   1  -2 2130.60   11.72
   2   1   2 2093.08   16.18
  -2   1  -2 2127.48   17.33
  -2   1  -3   85.06    4.94
   2   1   3   91.05    3.91
  -2   1  -3   94.98    5.74
   2   1   4 2424.18   17.96
  -2   1  -4 2406.65   24.10
  -2   1  -4 2420.26   25.38
  -2   1  -5 2812.94   28.79
   2   1   5 2734.10   19.92
  -2   1  -5 2764.03   29.63
  -2   1  -6  675.41   15.93
  -2   1  -6  747.25   17.18
   2   1   6  684.95   10.68
  -2   1  -7  128.55    8.79
  -2   1  -7  128.99    9.28
   2   1   7  120.86    5.26
  -2   1  -8 1256.74   25.16
   2   1   8 1299.47   16.28
  -2   1  -8 1277.85   26.09
   2   1   9  126.09    6.21
  -2   1  -9  125.07   10.51
  -2   1  -9  142.23   11.54
  -2   1 -10 2503.62   40.27
  -2   1 -10 2393.22   40.31
  -2   1 -11  541.56   21.21
  -2   1 -11  502.17   20.98
  -2   1 -12  582.65   23.64
  -2   1 -12  501.67   22.93
  -2   1 -13  432.29   21.88
  -2   1 -13  405.39   22.40
  -2   1 -14   23.25   12.20
  -2   1 -14   35.67   13.46
  -2   1 -15  163.36   18.63
  -2   1 -15  152.77   18.80
  -2   1 -16  319.65   24.51
  -2   1 -16  306.40   25.07
   2   2 -16   87.15   16.20
   2   2 -16   97.75   16.96
   2   2 -15   55.57   13.70
   2   2 -15   49.49   14.04
   2   2 -14  285.40   20.01
   2   2 -14  278.78   19.72
   2   2 -13  959.92   29.53
   2   2 -13  920.84   30.84
   2   2 -12  143.61   13.21
   2   2 -12  131.38   13.62
   2   2 -11  157.16   12.92
   2   2 -11  168.11   13.38
  -2   2  10  191.00    9.00
   2   2 -10  189.00   12.64
   2   2 -10  194.62   13.08
   2   2  -9   23.45    7.17
  -2   2   9   28.21    4.67
   2   2  -9   19.85    6.54
   2   2  -8  587.23   16.87
   2   2  -8  563.42   17.14
  -2   2   8  560.92   12.67
   2   2  -7 3962.22   38.92
   2   2  -7 3957.60   39.48
   2   2  -6   34.50    5.26
  -2   2   6   25.69    3.63
   2   2  -5 4434.82   35.01
  -2   2   5 4346.59   29.54
   2   2  -5 4407.39   34.37
  -2   2   4  455.75    9.42
   2   2  -4  452.19   10.67
   2   2  -4  436.88   10.00
   2   2  -4  414.23    5.30
   2   2  -4  441.03    5.39
   2   2  -3 2941.76   16.31
  -2   2   3 2782.52   21.24
   2   2  -3 2971.10   23.30
   2   2  -3 2949.84   21.21
  -2   2   2 5817.48   29.25
   2   2  -2 5969.29   24.63
   2   2  -2 6086.19   25.43
   2   2  -1   80.70    3.75
   2   2  -1   87.32    2.61
  -2   2   1   96.30    4.33
  -2   2   0  494.88    6.49
   2   2   0  532.26    8.40
  -2   2   0  523.26    8.04
  -2   2  -1 2040.31   13.56
   2   2   1 2075.30   16.47
  -2   2  -1 2131.65   15.64
  -2   2  -2 5046.78   28.41
  -2   2  -2 5099.85   16.59
   2   2   2 5059.75   26.07
  -2   2  -2 5094.31   16.16
  -2   2  -3 1633.83   18.54
   2   2   3 1648.01   15.44
  -2   2  -4  609.15   12.89
   2   2   4  615.14    9.88
  -2   2  -4  622.15   13.93
   2   2   5  231.59    6.69
  -2   2  -5  216.78    9.00
  -2   2  -5  205.57    9.37
   2   2   6  163.25    5.89
  -2   2  -6  166.83    9.52
  -2   2  -6  148.04    8.73
   2   2   7  354.97    8.83
  -2   2  -7  340.13   13.12
  -2   2  -7  332.32   13.41
  -2   2  -8   98.30    9.10
   2   2   8   92.41    5.50
  -2   2  -8   96.08    9.70
  -2   2  -9 2760.10   40.01
  -2   2  -9 2777.38   41.21
   2   2   9 2791.48   26.84
  -2   2 -10  159.00   12.55
  -2   2 -10  132.04   12.49
  -2   2 -11  714.37   24.87
  -2   2 -11  710.87   24.39
  -2   2 -12  392.59   20.92
  -2   2 -12  396.25   20.26
  -2   2 -13   79.28   13.44
  -2   2 -13   49.62   13.02
  -2   2 -14  336.22   22.93
  -2   2 -14  255.24   20.05
  -2   2 -15  281.14   23.01
  -2   2 -15  315.02   22.80
  -2   2 -16  107.17   17.70
  -2   2 -16  102.74   18.29
   2   3 -16   38.69   14.87
   2   3 -16   53.71   15.66
   2   3 -15  434.82   25.80
   2   3 -15  478.45   25.42
   2   3 -14  112.99   15.17
   2   3 -14   87.23   14.16
   2   3 -13   20.66   10.40
   2   3 -13   40.72   12.25
   2   3 -12   -4.59    9.27
   2   3 -12   -2.45    9.52
   2   3 -11 1225.30   30.19
  -2   3  11 1208.58   22.25
   2   3 -11 1251.28   30.92
  -2   3  10    9.07    4.80
   2   3 -10   -6.05    7.45
   2   3 -10    3.81    7.51
   2   3  -9 2959.06   40.76
  -2   3   9 2886.85   30.59
   2   3  -9 2837.75   39.33
  -2   3   8  205.17    8.46
   2   3  -8  230.31   12.38
   2   3  -8  224.74   11.82
   2   3  -7 1843.51   28.30
  -2   3   7 1824.36   22.08
   2   3  -7 1842.74   27.16
   2   3  -6  299.41   11.31
  -2   3   6  289.38    8.72
   2   3  -6  311.84   11.06
   2   3  -5   64.16    6.15
  -2   3   5   67.19    4.75
   2   3  -5   69.90    5.78
   2   3  -4  359.91    3.78
   2   3  -4  356.80   10.46
   2   3  -4  384.57    9.46
  -2   3   4  364.07    8.96
   2   3  -3 2920.20   15.83
  -2   3   3 2956.37   23.07
   2   3  -3 2994.18   21.45
   2   3  -2  565.73    7.73
  -2   3   2  540.28    9.55
   2   3  -2  552.30    7.84
  -2   3   1 1734.68   16.02
   2   3  -1 1769.13    9.01
   2   3  -1 1786.44   14.94
  -2   3   0  487.16    8.17
   2   3   0  488.16    8.42
   2   3   1  226.69    6.22
  -2   3  -1  221.25    4.87
  -2   3  -1  218.09    6.49
   2   3   2   24.11    3.06
  -2   3  -2   20.18    3.67
  -2   3  -2   23.23    1.47
   2   3   3 1725.74   16.97
  -2   3  -3 1755.02   20.36
  -2   3  -4  557.74   13.10
   2   3   4  521.84    9.90
  -2   3  -5 5460.88   43.18
  -2   3  -5 5620.24   45.01
   2   3   5 5417.19   32.24
   2   3   6  616.83   11.70
  -2   3  -6  588.03   16.47
   2   3   7 2947.69   26.25
  -2   3  -7 2855.57   36.66
  -2   3  -7 2914.33   37.77
   2   3   8   75.41    5.32
  -2   3  -8   68.63    8.71
  -2   3  -8   86.65    9.85
  -2   3  -9  350.70   16.03
  -2   3  -9  346.98   16.18
   2   3   9  355.82   10.62
   2   3  10   34.37    5.46
  -2   3 -10   22.74    9.00
  -2   3 -10   31.19    8.68
  -2   3 -11  399.83   19.69
  -2   3 -11  406.09   19.41
  -2   3 -12   53.38   11.62
  -2   3 -12   46.14   11.92
  -2   3 -13 1289.93   37.65
  -2   3 -13 1295.30   36.71
  -2   3 -14   62.74   15.42
  -2   3 -14   66.66   13.78
  -2   3 -15  456.34   27.16
  -2   3 -15  421.17   25.87
  -2   3 -16   95.46   18.26
  -2   3 -16   52.62   18.15
   2   4 -16  281.81   23.21
   2   4 -16  273.33   23.29
   2   4 -15  168.36   18.99
   2   4 -15  167.27   18.66
   2   4 -14   73.12   14.33
   2   4 -14   71.51   14.76
   2   4 -13  551.91   24.68
   2   4 -13  503.98   23.66
   2   4 -12   24.17   10.28
   2   4 -12   18.12   10.37
   2   4 -11  725.79   24.76
   2   4 -11  707.52   23.98
  -2   4  11  743.56   18.30
   2   4 -10  348.93   17.06
   2   4 -10  322.17   15.86
  -2   4  10  313.92   11.71
   2   4  -9  190.78   11.86
   2   4  -9  164.57   11.93
  -2   4   9  153.95    8.29
  -2   4   8  490.24   13.01
   2   4  -8  552.41   17.94
   2   4  -8  535.00   16.89
   2   4  -7  515.68   16.48
  -2   4   7  536.60   12.89
   2   4  -7  504.76   15.14
   2   4  -6  203.40   10.52
   2   4  -6  199.21    9.34
  -2   4   6  216.25    8.12
  -2   4   5 5183.10   35.07
   2   4  -5 5189.06   43.39
   2   4  -5 5328.80   37.92
  -2   4   4 1338.95   17.40
   2   4  -4 1336.09   17.12
   2   4  -3 1097.21   13.63
  -2   4   3 1127.60   15.21
   2   4  -3 1093.77    9.52
   2   4  -2  112.89    4.07
  -2   4   2  103.98    4.97
   2   4  -2  111.61    4.05
  -2   4   1  106.33    4.82
   2   4  -1  106.93    4.32
   2   4   0 6497.84   30.77
  -2   4   0 6386.04   29.29
  -2   4  -1 3586.88   26.78
  -2   4  -1 3672.03   19.38
   2   4   1 3700.64   24.22
   2   4   2 2168.58   19.41
  -2   4  -2 2157.02   22.56
  -2   4  -2 2173.65    9.55
  -2   4  -3 3676.83   31.60
   2   4   3 3641.73   26.01
   2   4   4   73.10    4.79
  -2   4  -4   69.17    6.17
  -2   4  -5  646.59   16.06
   2   4   5  615.12   11.84
   2   4   6 1272.25   17.53
  -2   4  -6 1217.20   23.85
   2   4   7 1112.27   17.24
  -2   4  -7 1155.05   24.60
  -2   4  -7 1093.35   23.67
  -2   4  -8  392.40   15.99
   2   4   8  402.37   11.18
  -2   4  -8  358.57   15.76
   2   4   9  702.89   15.45
  -2   4  -9  712.47   22.68
  -2   4  -9  745.10   22.58
  -2   4 -10  315.35   16.67
  -2   4 -10  282.12   16.51
   2   4  10  312.17   11.27
  -2   4 -11  976.37   29.04
  -2   4 -11  973.61   29.58
  -2   4 -12  343.38   20.34
  -2   4 -12  331.05   19.98
  -2   4 -13    0.66   11.80
  -2   4 -13    3.32   10.86
  -2   4 -14  528.10   26.81
  -2   4 -14  535.26   27.47
  -2   4 -15  327.52   23.96
  -2   4 -15  401.86   25.87
  -2   4 -16   90.37   16.79
  -2   4 -16  130.28   20.86
   2   5 -16   56.83   16.23
   2   5 -16   56.40   16.66
   2   5 -15  122.20   17.21
   2   5 -15  143.14   18.30
   2   5 -14  737.29   30.59
   2   5 -14  629.45   28.18
   2   5 -13   12.30   11.24
   2   5 -13   20.72   10.92
   2   5 -12  677.71   25.30
   2   5 -12  650.86   25.71
  -2   5  11  455.84   14.98
   2   5 -11  422.58   20.07
   2   5 -11  447.14   19.62
   2   5 -10  208.74   14.42
  -2   5  10  235.80   10.95
   2   5 -10  223.34   14.04
  -2   5   9  337.30   12.06
   2   5  -9  349.68   16.58
   2   5  -9  356.82   15.78
   2   5  -8  852.38   23.10
   2   5  -8  895.65   21.66
  -2   5   8  899.43   18.02
   2   5  -7 1188.87   25.57
  -2   5   7 1189.87   19.62
   2   5  -7 1207.16   22.91
   2   5  -6 2482.74   33.90
  -2   5   6 2378.54   26.22
   2   5  -6 2465.24   29.40
   2   5  -5   18.56    4.62
  -2   5   5   20.46    3.67
  -2   5   4 3189.62   28.11
   2   5  -4 3216.02   26.86
   2   5  -3  361.93    5.67
  -2   5   3  358.03    9.40
   2   5  -3  378.40    8.61
   2   5  -2  917.20   10.61
  -2   5   2  860.21   13.21
   2   5  -1  211.97    5.86
  -2   5   1  201.68    6.36
   2   5   0  909.73   12.39
  -2   5   0  926.72   11.82
   2   5   1  204.92    6.57
  -2   5  -1  204.31    5.15
  -2   5  -2 2455.02   26.51
  -2   5  -2 2486.56   10.90
   2   5   2 2516.68   22.22
   2   5   3  699.14   12.32
  -2   5  -3  691.39   15.45
  -2   5  -4  931.43   18.98
   2   5   4  953.48   14.83
   2   5   5  544.87   11.81
  -2   5  -5  591.71   16.41
  -2   5  -6  314.35   13.25
   2   5   6  300.44    9.47
   2   5   7 1584.00   21.65
  -2   5  -7 1634.11   29.77
  -2   5  -8 1751.74   32.69
  -2   5  -8 1684.14   32.54
   2   5   8 1656.48   23.23
  -2   5  -9   61.13    9.70
   2   5   9   59.88    6.30
  -2   5  -9   82.96   10.41
  -2   5 -10 1583.23   35.27
  -2   5 -10 1689.57   36.42
   2   5  10 1585.12   25.05
  -2   5 -11    9.62    9.32
  -2   5 -11    5.66    9.56
  -2   5 -12  486.32   23.63
  -2   5 -12  467.67   23.28
  -2   5 -13  359.51   22.81
  -2   5 -13  375.01   22.99
  -2   5 -14   60.86   14.18
  -2   5 -14   46.83   14.83
  -2   5 -15   36.67   15.29
  -2   5 -16  319.37   26.10
   2   6 -16  935.96   37.74
   2   6 -16  965.73   38.35
   2   6 -15   10.49   13.46
   2   6 -15   26.33   13.16
   2   6 -14  174.86   18.94
   2   6 -14  177.98   18.36
   2   6 -13   26.19   12.26
   2   6 -13   31.59   11.69
   2   6 -12   18.03   11.63
  -2   6  12   17.97    7.18
   2   6 -12   12.42    9.69
   2   6 -11  148.97   14.52
   2   6 -11  136.02   13.14
   2   6 -10 1364.55   33.43
  -2   6  10 1356.64   24.89
   2   6 -10 1273.57   29.88
  -2   6   9   87.92    7.69
   2   6  -9  103.86   11.34
   2   6  -9   95.26    9.90
   2   6  -8 1898.14   31.09
  -2   6   8 1890.03   26.80
   2   6  -7  218.97   12.99
  -2   6   7  212.62    9.31
   2   6  -7  225.82   11.35
  -2   6   6   74.96    6.14
   2   6  -6   63.44    6.93
  -2   6   5   33.47    4.57
   2   6  -5   44.13    5.63
  -2   6   4 1551.28   20.55
   2   6  -4 1569.67   19.99
   2   6  -3  349.17    5.76
  -2   6   3  341.76    9.62
   2   6  -2 7183.96   30.50
  -2   6   2 7173.36   39.17
   2   6  -1  525.60    9.41
  -2   6   1  515.72   10.12
   2   6   0 3078.61   23.61
  -2   6   0 3152.22   22.74
  -2   6  -1  115.02    4.37
   2   6   1  106.42    5.42
  -2   6  -2  425.40    5.10
   2   6   2  407.24    9.70
  -2   6  -3  241.83   10.50
   2   6   3  222.55    7.66
  -2   6  -4 1171.60   22.19
   2   6   4 1201.23   17.48
   2   6   5   71.01    5.43
  -2   6  -5   68.79    8.10
   2   6   6 2913.29   29.45
  -2   6  -6 2852.85   38.54
   2   6   7   16.35    4.35
  -2   6  -7    6.92    7.19
  -2   6  -8  596.58   20.93
   2   6   8  610.57   15.18
   2   6   9  171.67    9.09
  -2   6  -9  205.53   14.30
   2   6  10   26.18    5.90
  -2   6 -10   26.17    9.47
  -2   6 -11  123.90   14.32
   2   6  11  131.29    9.61
  -2   6 -12 1396.25   38.66
  -2   6 -13   91.51   15.20
  -2   6 -14  704.99   32.25
  -2   6 -15   77.44   18.48
  -2   6 -16  156.53   20.63
   2   7 -16    2.17   15.55
   2   7 -15  131.30   18.57
   2   7 -15   96.13   16.64
   2   7 -14  919.11   34.96
   2   7 -14  897.75   33.33
   2   7 -13   11.00   12.08
   2   7 -13   10.49   11.36
   2   7 -12 1088.68   34.20
  -2   7  12 1036.26   24.90
   2   7 -12 1065.25   32.00
   2   7 -11  251.96   17.93
   2   7 -11  258.62   16.55
  -2   7  11  238.32   12.44
  -2   7  10  544.54   17.04
   2   7 -10  549.75   22.89
   2   7 -10  581.56   21.37
  -2   7   9  768.97   18.92
   2   7  -9  789.25   25.23
   2   7  -9  750.72   22.10
  -2   7   8   28.28    5.62
   2   7  -8   35.75    7.69
   2   7  -7  470.19   15.70
  -2   7   7  440.54   13.47
  -2   7   6 2272.27   27.87
   2   7  -6 2354.29   30.34
  -2   7   5  150.01    7.60
   2   7  -5  150.58    8.21
  -2   7   4  425.90   11.57
   2   7  -3  881.21    9.25
  -2   7   3  859.53   15.48
   2   7  -2  156.32    5.15
  -2   7   2  151.96    6.64
   2   7  -2  149.22    3.77
   2   7  -1  861.49   12.51
  -2   7   1  861.45   13.44
  -2   7   0 1765.86   17.70
   2   7   0 1854.69   19.27
  -2   7  -1  531.60    8.73
   2   7   1  538.76   11.28
   2   7   2 5416.68   36.08
  -2   7  -2 5598.12   19.68
  -2   7  -2 5411.38   19.76
   2   7   3   65.86    5.22
  -2   7  -3   57.69    7.08
   2   7   4  504.22   12.30
  -2   7  -4  569.85   17.11
  -2   7  -5  400.98   15.34
   2   7   5  369.96   11.07
  -2   7  -6  266.98   13.86
   2   7   6  252.79    9.86
   2   7   7  711.87   16.35
  -2   7  -7  718.67   22.31
   2   7   8 1539.24   24.61
  -2   7  -8 1635.48   34.41
  -2   7  -9  107.11   12.41
   2   7   9  113.25    8.35
  -2   7 -10  912.30   29.18
   2   7  10  939.15   21.31
  -2   7 -11  183.59   16.40
   2   7  11  170.93   10.65
  -2   7 -12  179.87   18.21
  -2   7 -13  529.04   27.43
  -2   7 -14   29.59   13.96
  -2   7 -15  174.67   20.47
  -2   7 -16  496.91   31.85
   2   8 -16  315.33   25.25
   2   8 -15  261.81   22.84
   2   8 -14   20.38   12.84
  -2   8  13  638.51   21.70
   2   8 -13  606.26   26.57
  -2   8  12   81.64   10.03
   2   8 -12   77.16   13.16
  -2   8  11  650.20   19.77
   2   8 -11  623.66   23.96
  -2   8  10  408.79   15.32
   2   8 -10  426.93   19.11
  -2   8   9   25.62    6.45
   2   8  -9   24.65    7.95
  -2   8   8   38.52    6.35
   2   8  -8   29.41    7.69
  -2   8   7  965.88   20.06
   2   8  -7  976.27   22.19
  -2   8   6   29.43    5.23
   2   8  -6   34.86    6.44
  -2   8   5 2322.31   28.16
  -2   8   4  721.43   15.50
  -2   8   3  519.22   12.67
   2   8  -3  492.32    7.27
   2   8  -3  503.61    7.26
   2   8  -2  704.93   10.64
  -2   8   2  757.58   14.31
   2   8  -2  717.23    7.36
   2   8  -1   62.08    4.27
  -2   8   1   64.59    4.74
  -2   8   0 1996.70   19.60
   2   8   0 1973.38   20.92
  -2   8  -1 2825.18   20.71
   2   8   1 2701.05   25.68
   2   8   2  107.80    6.20
  -2   8  -2  122.63    3.51
  -2   8  -2  114.92    3.56
   2   8   3 2353.20   26.04
  -2   8  -4   98.76    9.44
   2   8   4   83.67    6.22
  -2   8  -5  245.46   13.70
   2   8   5  232.93    9.55
  -2   8  -6  483.22   18.44
   2   8   6  475.18   13.67
  -2   8  -7  601.80   21.72
   2   8   7  537.03   15.09
  -2   8  -8  120.65   12.36
   2   8   8  119.21    8.73
  -2   8  -9 1672.87   38.35
   2   8   9 1707.58   28.18
  -2   8 -10   47.72   12.12
   2   8  10   47.10    7.33
  -2   8 -11  807.23   30.52
   2   8  11  791.43   21.34
  -2   8 -12  425.60   24.47
   2   8  12  466.97   17.63
  -2   8 -13   31.74   14.31
  -2   8 -14  128.85   18.04
  -2   8 -15  209.69   22.17
  -2   9  13    5.17    8.55
   2   9 -13   17.67   12.33
  -2   9  12   63.35   10.04
   2   9 -12   61.85   12.99
   2   9 -11  433.69   20.89
  -2   9  11  433.47   17.10
   2   9 -10   71.01   11.35
  -2   9  10   66.60    8.24
  -2   9   9 1775.66   30.14
   2   9  -9 1952.67   36.37
  -2   9   8   33.79    6.63
   2   9  -8   22.59    7.72
  -2   9   7 1772.49   27.91
  -2   9   6   50.23    6.17
  -2   9   5  141.12    8.32
  -2   9   4  191.36    8.89
  -2   9   4  192.50    8.34
   2   9  -3  790.26    9.42
  -2   9   3  771.53   16.00
  -2   9   3  785.28   14.71
   2   9  -2   34.40    2.13
  -2   9   2   33.54    4.51
   2   9  -2   50.62    3.78
  -2   9   1 4857.73   34.02
   2   9  -1 4751.64   31.34
   2   9   0   59.36    4.93
  -2   9   0   52.15    4.30
   2   9   1  878.60   15.55
  -2   9  -1  879.84   12.17
   2   9   2  112.15    6.79
  -2   9  -2  113.35    3.74
   2   9   3 1318.49   20.53
   2   9   4  135.12    7.92
   2   9   5 1848.11   26.09
  -2   9  -5 1820.28   33.74
  -2   9  -6  556.33   20.87
   2   9   6  558.71   15.37
  -2   9  -7 3177.05   49.25
   2   9   7 3006.74   35.75
  -2   9  -8   67.63   11.69
   2   9   8   71.62    7.81
  -2   9  -9  181.03   15.77
   2   9   9  179.77   10.92
  -2   9 -10  153.69   15.87
   2   9  10  166.96   11.22
  -2   9 -11  422.01   23.42
   2   9  11  410.84   16.42
  -2   9 -12   -6.08   12.44
   2   9  12   15.62    7.43
  -2   9 -13  481.06   27.88
  -2   9 -14   91.92   18.46
  -2   9 -15  543.25   32.62
  -2  10  14   80.14   11.75
  -2  10  13  509.05   20.87
  -2  10  12  203.64   14.02
  -2  10  11  601.96   20.58
  -2  10  10  433.88   17.07
  -2  10   9   75.23    8.48
  -2  10   8  760.14   19.68
  -2  10   7 1689.09   27.78
  -2  10   6   44.75    6.37
  -2  10   5  400.94   13.34
  -2  10   4   17.10    4.92
   2  10  -3 1494.03   13.47
  -2  10   3 1488.47   22.69
  -2  10   3 1586.28   21.57
  -2  10   2 2605.37   28.17
   2  10  -2 2580.89   21.55
   2  10  -2 2605.35   21.80
   2  10  -1 1513.25   18.52
  -2  10   1 1466.71   19.73
   2  10  -1 1510.80   16.03
  -2  10   0   36.05    4.01
   2  10   0   35.97    4.42
  -2  10  -1 1517.32   16.50
   2  10   1 1541.07   21.18
   2  10   2  620.56   14.41
  -2  10  -2  623.78    8.36
   2  10   3 3254.43   33.70
   2  10   4  959.37   19.22
   2  10   5  391.20   13.24
   2  10   6  318.30   12.48
   2  10   7   35.36    6.35
  -2  10  -7   23.51    9.49
   2  10   8  153.39   10.10
  -2  10  -8  164.44   15.27
  -2  10  -9 1027.74   32.71
   2  10   9  992.56   23.59
   2  10  10   64.38    9.04
  -2  10 -10   89.91   14.22
   2  10  11  446.09   17.71
  -2  10 -11  420.70   24.51
  -2  10 -12  205.10   19.83
   2  10  12  238.47   14.36
  -2  10 -13   39.74   15.28
   2  10  13   29.71    8.82
   2  10  13   34.29    8.76
  -2  10 -14  256.93   24.91
  -2  10 -15  189.56   23.10
  -2  11  14  519.80   22.61
  -2  11  13   20.65    9.48
  -2  11  12  898.48   26.69
  -2  11  11    5.34    7.41
  -2  11  10  167.05   12.04
  -2  11   9  744.70   21.39
  -2  11   8   68.03    8.46
  -2  11   7  134.04    9.79
  -2  11   6 1793.30   29.21
  -2  11   5   12.26    5.29
  -2  11   4  652.69   16.64
   2  11  -3   47.95    3.31
  -2  11   3   64.35    6.18
  -2  11   3   44.64    5.85
   2  11  -2   32.51    3.67
  -2  11   2   33.16    5.01
   2  11  -1  545.05   11.58
  -2  11   1  571.08   12.93
   2  11  -1  579.96   10.29
   2  11  -1  524.01   11.73
  -2  11   0 1367.33   18.23
   2  11   0 1377.39   19.79
  -2  11  -1   76.03    4.67
   2  11   1   71.36    5.93
  -2  11  -2 2765.60   18.20
   2  11   2 2681.86   30.41
   2  11   3  196.36    9.46
   2  11   4 1064.99   20.80
   2  11   5  739.05   18.17
   2  11   6   58.90    7.09
   2  11   7  244.32   11.94
   2  11   8 1187.81   25.48
  -2  11  -9  236.04   18.36
   2  11   9  262.38   13.55
   2  11  10 1030.54   25.55
  -2  11 -10  922.37   33.33
  -2  11 -11  320.69   23.22
   2  11  11  278.76   15.18
  -2  11 -12  175.07   19.45
   2  11  12  214.94   14.54
   2  11  12  224.30   14.30
  -2  11 -13   18.47   15.09
   2  11  13   47.68   10.38
   2  11  13   53.31   10.60
  -2  11 -14   29.39   16.06
  -2  12  14  231.95   16.92
  -2  12  13   16.22    9.99
  -2  12  12   68.97   11.38
  -2  12  11  168.30   13.42
  -2  12  10 1294.46   29.94
  -2  12   9  107.12   10.24
  -2  12   8  946.24   23.99
  -2  12   7   73.74    8.28
  -2  12   6  296.12   13.22
  -2  12   5   44.53    7.04
  -2  12   4  517.73   15.65
   2  12  -3   44.10    3.20
  -2  12   3   39.78    6.12
   2  12  -2 2575.86   23.04
  -2  12   2 2613.49   29.86
   2  12  -1  169.25    7.25
  -2  12   1  162.73    7.85
   2  12  -1  181.28    6.16
   2  12  -1  182.02    7.64
   2  12   0 1895.08   23.94
   2  12   0 1829.10   21.30
  -2  12   0 1905.29   22.12
   2  12   0 1910.59   23.51
   2  12   1  125.91    7.48
  -2  12  -1  133.87    5.98
   2  12   2   26.83    5.17
  -2  12  -2   31.76    3.00
   2  12   3   27.42    5.57
   2  12   4 1491.52   25.68
   2  12   5    3.91    5.28
   2  12   6 2480.20   35.04
   2  12   7  213.41   11.93
   2  12   8  697.39   20.71
   2  12   9   22.98    7.52
   2  12  10   14.96    7.82
   2  12  11  264.50   15.53
   2  12  11  267.65   15.28
   2  12  12  525.42   21.18
   2  12  12  534.63   20.98
   2  12  13  126.91   13.02
   2  12  13  114.46   12.85
  -2  13  15  295.53   19.94
  -2  13  14  411.99   21.53
  -2  13  13   31.73   10.50
  -2  13  12  824.27   27.11
  -2  13  11  141.86   13.22
  -2  13  10  201.13   13.81
  -2  13   9  198.57   13.18
  -2  13   8   29.62    7.82
  -2  13   7  134.47   11.16
  -2  13   6  689.42   19.79
  -2  13   5  157.40   10.15
  -2  13   4  834.58   20.08
  -2  13   3  907.30   19.85
   2  13  -3  930.49   11.54
   2  13  -2    7.56    3.18
  -2  13   2   15.60    4.94
   2  13  -1 1401.34   19.44
  -2  13   1 1335.00   20.83
   2  13  -1 1306.85   14.35
   2  13   0 1052.38   18.35
  -2  13   0  989.51   16.69
   2  13   0 1046.06   18.48
   2  13   0 1020.58   16.25
   2  13   1  510.02   14.05
   2  13   1  509.56   13.75
  -2  13  -1  534.68   11.10
   2  13   1  556.41   13.77
  -2  13  -2 2153.00   16.99
   2  13   2 2057.40   28.84
   2  13   3   84.84    7.73
   2  13   4  941.39   21.22
   2  13   5  189.81   10.94
   2  13   6   11.52    5.95
   2  13   7  257.53   13.26
   2  13   8  487.83   18.18
   2  13   9   22.08    7.74
   2  13  10  700.81   23.09
   2  13  10  688.30   22.29
   2  13  11  134.87   12.76
   2  13  11  156.50   13.64
   2  13  12  124.63   13.06
   2  13  12  146.48   13.45
   2  13  13  304.41   18.30
   2  13  13  298.10   18.05
   2  13  14   46.62   11.71
  -2  14  14  187.30   16.65
  -2  14  13  817.99   28.87
  -2  14  12  109.95   13.10
  -2  14  11  761.51   25.89
  -2  14  10   15.59    8.54
  -2  14   9   -4.16    8.47
  -2  14   8  458.26   18.36
  -2  14   7  299.36   14.85
  -2  14   6   45.43    8.13
  -2  14   5 1443.36   27.89
  -2  14   4  271.42   12.62
   2  14  -3  533.72    8.91
  -2  14   3  529.09   15.84
   2  14  -2  927.92   14.93
  -2  14   2  934.59   19.31
  -2  14   1  488.33   13.33
   2  14  -1  486.98    8.95
   2  14  -1  462.03   12.05
   2  14   0  371.37   11.60
   2  14   0  324.64   10.93
  -2  14   0  359.55   10.79
   2  14   0  355.03   10.01
   2  14   1 1498.53   23.68
  -2  14  -1 1562.47   19.09
   2  14   1 1572.38   24.56
   2  14   1 1490.51   22.01
  -2  14  -2  237.21    6.13
   2  14   2  219.79   10.66
   2  14   2  221.11   10.50
   2  14   3 2463.40   32.69
   2  14   3 2590.98   34.40
   2  14   4   46.90    6.75
   2  14   4   38.60    6.67
   2  14   5  321.27   14.18
   2  14   6  113.19    9.99
   2  14   7  223.34   12.79
   2  14   7  180.76   12.10
   2  14   8   75.18    9.68
   2  14   8   62.65    9.61
   2  14   9  493.95   19.36
   2  14   9  502.09   19.77
   2  14  10  219.41   14.77
   2  14  10  219.62   14.98
   2  14  11  646.77   23.69
   2  14  11  634.35   23.19
   2  14  12   87.44   12.35
   2  14  12   95.40   12.52
   2  14  13    2.00    9.52
   2  14  14  296.94   18.84
  -2  15  13  105.48   14.45
  -2  15  12   14.86   10.74
  -2  15  11  502.70   22.69
  -2  15  10   18.73    8.62
  -2  15   9  937.88   27.33
  -2  15   8   10.07    8.17
  -2  15   7  489.82   19.13
  -2  15   6  142.32   11.25
  -2  15   5   34.46    7.42
  -2  15   4   24.79    6.81
  -2  15   3 1767.50   28.56
  -2  15   2   38.47    6.20
   2  15  -2   29.09    4.13
   2  15  -1  946.45   17.36
  -2  15   1  984.75   19.06
   2  15   0   13.24    3.91
   2  15   0   15.79    4.87
  -2  15   0    5.71    4.08
   2  15   1  267.20   11.12
  -2  15  -1  263.51    8.63
   2  15   1  276.59   10.43
   2  15   1  239.29   10.69
   2  15   2  296.31   12.46
   2  15   2  279.52   12.10
   2  15   3  271.63   12.58
   2  15   3  280.10   12.62
   2  15   4   92.04    8.63
   2  15   4   84.12    8.84
   2  15   5 2600.70   37.51
   2  15   5 2667.14   38.74
   2  15   6  399.86   16.69
   2  15   6  398.82   16.27
   2  15   7 1275.04   29.11
   2  15   7 1278.97   28.51
   2  15   8   63.26   10.01
   2  15   8   43.99    8.92
   2  15   9   60.18    9.86
   2  15   9   71.39   10.43
   2  15  10   31.96    9.25
   2  15  10   29.57    9.23
   2  15  11  188.24   14.76
   2  15  11  171.24   14.81
   2  15  12   33.42   10.55
   2  15  13  862.65   29.38
   2  15  14   48.78   12.32
  -2  16  13  627.75   26.92
  -2  16  12    9.60    9.94
  -2  16  11  335.56   19.45
  -2  16  10  519.75   22.12
  -2  16   9   49.15   10.49
  -2  16   8  194.86   14.24
  -2  16   7  159.70   12.68
  -2  16   6  171.21   12.20
  -2  16   5 1995.16   34.34
  -2  16   4  244.87   12.86
  -2  16   3   37.22    6.93
   2  16  -2  213.90    8.02
  -2  16   2  222.75   10.96
   2  16  -1   13.28    4.66
  -2  16   1   17.17    5.35
   2  16   0  254.62   10.66
   2  16   0  273.79    8.66
  -2  16   0  276.85   10.25
   2  16   1 1626.36   26.16
   2  16   1 1754.35   23.86
  -2  16  -1 1717.64   20.81
   2  16   2   59.21    7.59
   2  16   3  775.38   20.10
   2  16   3  777.31   20.24
   2  16   4  299.60   13.94
   2  16   4  329.67   14.82
   2  16   5  547.07   18.83
   2  16   5  566.63   19.32
   2  16   6  980.98   25.10
   2  16   6 1036.17   26.11
   2  16   7  345.08   16.51
   2  16   7  361.61   17.06
   2  16   8  189.44   13.53
   2  16   8  206.19   14.11
   2  16   9  373.42   18.12
   2  16   9  293.45   16.55
   2  16  10   20.48    9.30
   2  16  10   24.23    9.42
   2  16  11  241.89   16.64
   2  16  12  343.68   19.76
   2  16  13   10.39   10.52
  -2  17  12  535.85   24.99
  -2  17  11  258.30   18.37
  -2  17  10  195.89   15.80
  -2  17   9  135.94   13.40
  -2  17   8  267.62   16.48
  -2  17   7  230.56   14.93
  -2  17   6  666.59   22.01
  -2  17   5   92.65    9.81
  -2  17   4 1478.33   28.84
  -2  17   3  422.24   15.48
   2  17  -2    7.30    3.93
  -2  17   2   11.25    5.75
   2  17  -1   63.89    6.29
  -2  17   1   63.77    6.81
   2  17   0  571.38   15.60
  -2  17   0  577.76   14.51
   2  17   1   96.32    8.43
  -2  17  -1  102.48    6.33
   2  17   1   85.55    6.77
   2  17   2 1458.26   26.68
   2  17   3  109.00    9.45
   2  17   4 1253.03   27.20
   2  17   5  288.65   14.50
   2  17   5  293.09   14.84
   2  17   6   38.67    8.82
   2  17   6   29.34    8.02
   2  17   7  186.00   13.61
   2  17   7  211.92   14.11
   2  17   8  167.50   13.24
   2  17   8  167.84   13.21
   2  17   9    9.56    9.27
   2  17  10  560.58   23.12
   2  17  11    4.49    9.48
   2  17  12   63.62   12.32
  -2  18  11   44.72   11.52
  -2  18  10  423.50   21.57
  -2  18   9   63.75   11.56
  -2  18   8 1045.32   29.81
  -2  18   7    6.12    8.65
  -2  18   6   81.29   10.73
  -2  18   5   78.65   10.22
  -2  18   4  330.14   15.05
  -2  18   3   -0.22    6.44
  -2  18   2 1094.86   23.13
   2  18  -1   95.95    7.50
  -2  18   1   90.36    8.02
   2  18   0  732.99   17.87
  -2  18   0  733.02   16.33
   2  18   1   47.16    7.45
   2  18   1   62.88    6.20
   2  18   2   14.72    6.79
   2  18   3  125.90   10.26
   2  18   4  966.27   24.76
   2  18   5    7.30    7.82
   2  18   6 1113.77   28.51
   2  18   7   60.82   10.69
   2  18   8  513.16   21.37
   2  18   9   12.07    9.09
   2  18  10   59.03   10.98
   2  18  11   19.02   10.68
  -2  19  10  111.82   14.19
  -2  19   9  237.91   16.99
  -2  19   8  241.28   17.06
  -2  19   7   77.92   11.49
  -2  19   6  463.29   19.47
  -2  19   5   48.34    9.72
  -2  19   4  838.18   23.13
  -2  19   3  499.35   17.55
  -2  19   2   53.73    7.60
   2  19  -1  630.76   15.37
  -2  19   1  642.26   17.17
   2  19   0  219.41   11.11
  -2  19   0  191.56    9.27
   2  19   1  226.30   12.04
   2  19   2  663.09   19.77
   2  19   3   31.56    8.01
   2  19   4  629.24   20.86
   2  19   5  270.39   15.27
   2  19   6   64.75   10.26
   2  19   7  188.50   14.60
   2  19   8  237.54   16.00
   2  19   9   11.29    9.65
   2  19  10  646.50   26.07
   2  19  11  167.89   16.75
  -2  20  10  160.40   15.91
  -2  20   9   91.49   12.89
  -2  20   8   22.74    9.73
  -2  20   7  494.61   21.38
  -2  20   6   44.09    9.87
  -2  20   5  589.32   21.44
  -2  20   4   93.65   10.30
  -2  20   3   96.29   10.00
  -2  20   2  180.00   11.14
  -2  20   1   70.01    8.03
   2  20   0  264.07   11.96
   2  20   1 1382.85   26.53
   2  20   2    3.52    6.87
   2  20   2   12.23    5.89
   2  20   3  692.25   21.70
   2  20   4   51.47    9.95
   2  20   5  123.52   12.11
   2  20   6  142.05   13.22
   2  20   7   67.30   11.62
   2  20   8   51.29   11.20
   2  20   9  995.45   31.38
   2  20  10   12.51   10.85
  -2  21   9 1014.80   32.07
  -2  21   8   37.34   11.93
  -2  21   7  171.04   15.04
  -2  21   6   -9.12    8.86
  -2  21   5   16.59    8.78
  -2  21   4    9.31    7.68
  -2  21   3  719.88   21.51
  -2  21   2   60.71    8.61
  -2  21   1 1453.47   25.56
   2  21   1  235.75   13.02
   2  21   2   47.31    8.81
   2  21   3   41.89    8.91
   2  21   4  237.69   15.00
   2  21   5  738.57   24.67
   2  21   6   -2.25    9.10
   2  21   7  332.74   19.10
   2  21   8   57.28   12.13
   2  21   9   74.03   13.29
  -2  22   8  521.92   23.57
  -2  22   7  526.60   23.14
  -2  22   6   18.66    9.47
  -2  22   5  195.02   14.92
  -2  22   4    5.49    8.19
  -2  22   3  471.87   18.26
  -2  22   2  249.58   13.19
   2  22   1  233.19   12.65
   2  22   2   25.40    8.42
   2  22   3  643.34   21.68
   2  22   4  237.03   14.95
   2  22   5    6.31    8.75
   2  22   6  301.23   18.21
   2  22   7   49.70   12.26
  -2  23   6  665.68   24.73
  -2  23   5   45.57    9.68
  -2  23   4  474.92   19.29
  -2  23   3    8.67    7.95
   2  23   2  718.88   22.00
   2  23   3   19.12    8.70
   2  23   4  189.26   14.71
   2  23   5   47.60   11.37
   2  23   6    9.43    9.55
  -2  24   5   53.16   11.17
  -2  24   4  193.62   13.89
   2  24   3  -10.40    9.39
   2  24   4  267.62   17.00
   2  24   5   56.02   12.14
   2  25   4   49.07   10.96
  -3 -25   2   15.40   10.57
  -3 -25   1  326.26   20.95
   3 -25   0  367.91   21.94
   3 -25   1  117.17   15.55
   3 -24  -3   28.78   11.98
  -3 -24   2   27.47   10.74
   3 -24  -2   40.11   12.98
   3 -24  -1  199.32   17.36
  -3 -24   1  213.48   17.37
  -3 -24   0    7.06   10.28
   3 -24   0   13.71   11.37
  -3 -24  -1 1205.48   35.79
   3 -24   1 1304.91   36.47
  -3 -24  -2   32.68   12.20
  -3 -24  -3  367.88   22.42
   3 -23  -5  258.14   19.48
   3 -23  -4  108.21   15.17
   3 -23  -3  688.86   27.88
  -3 -23   3  753.03   27.06
  -3 -23   2   81.01   12.88
   3 -23  -2   91.12   14.00
  -3 -23   1  685.59   26.40
   3 -23  -1  676.59   27.11
  -3 -23   0   68.08   12.34
   3 -23   0   67.21   12.70
   3 -23   1  147.04   14.61
  -3 -23  -1  153.51   15.45
  -3 -23  -2   83.10   13.09
  -3 -23  -3  373.97   21.43
  -3 -23  -4   58.29   12.70
  -3 -23  -5  327.29   21.06
   3 -22  -8  247.99   22.92
   3 -22  -7  212.62   18.23
   3 -22  -7  251.83   22.32
   3 -22  -6   63.37   13.14
   3 -22  -5  118.46   14.45
   3 -22  -4  304.66   19.23
  -3 -22   3   67.88   11.49
   3 -22  -3   70.55   12.84
  -3 -22   2  772.32   26.67
   3 -22  -2  808.68   28.58
  -3 -22   1  206.20   15.20
   3 -22  -1  197.40   16.46
  -3 -22   0  216.50   16.26
   3 -22   0  223.68   16.43
  -3 -22  -1  155.46   15.11
   3 -22   1  127.12   13.50
  -3 -22  -2   13.14    9.27
   3 -22   2   21.41    9.87
  -3 -22  -3  299.46   18.85
  -3 -22  -4  600.07   25.43
  -3 -22  -5   22.78   11.15
  -3 -22  -6  206.75   17.49
  -3 -22  -7  149.42   16.64
   3 -21  -9    8.66   15.70
   3 -21  -8  426.69   26.31
   3 -21  -8  397.90   22.79
   3 -21  -7   60.25   13.22
   3 -21  -7   45.82   15.66
   3 -21  -6  879.02   30.19
   3 -21  -5   39.39   11.97
   3 -21  -4  410.51   21.38
  -3 -21   3   14.49    9.35
   3 -21  -3    9.23    9.35
  -3 -21   2   51.78   10.44
   3 -21  -2   42.22   10.63
  -3 -21   1   47.12   10.11
   3 -21  -1   69.87   11.73
   3 -21   0  513.09   21.82
  -3 -21   0  462.86   21.28
  -3 -21  -1   74.27   11.73
   3 -21   1   59.33   10.75
  -3 -21  -2 1404.71   35.19
   3 -21   2 1354.94   32.75
  -3 -21  -3   39.73   10.32
  -3 -21  -4   29.86   10.37
  -3 -21  -5   -8.39   10.05
  -3 -21  -6   54.05   12.08
  -3 -21  -7  -15.73   11.00
  -3 -21  -8  765.90   28.26
  -3 -21  -9   20.25   11.01
   3 -20 -10  924.51   37.72
   3 -20 -10  841.82   29.54
   3 -20  -9   78.38   13.95
   3 -20  -9   80.19   18.06
   3 -20  -8  245.26   21.22
   3 -20  -8  285.55   19.19
   3 -20  -7   61.72   15.05
   3 -20  -7   52.79   12.08
   3 -20  -6   85.47   12.67
   3 -20  -5  115.82   13.46
   3 -20  -4  542.23   22.84
  -3 -20   3    0.44    8.38
   3 -20  -3    7.74    8.79
  -3 -20   2  581.86   21.58
   3 -20  -2  591.52   23.17
  -3 -20   1   25.24    9.00
   3 -20  -1   34.08    9.94
  -3 -20   0  121.80   12.43
   3 -20   0  126.75   12.43
  -3 -20  -1  335.98   17.77
   3 -20   1  352.63   17.71
  -3 -20  -2   78.37   11.29
   3 -20   2   69.38   10.14
  -3 -20  -3  108.89   12.53
  -3 -20  -4 1266.07   33.23
  -3 -20  -5  114.10   12.73
  -3 -20  -6  591.00   24.35
  -3 -20  -7  115.50   13.88
  -3 -20  -8  133.28   14.82
  -3 -20  -9   40.54   11.67
  -3 -20 -10  103.35   13.74
   3 -19 -11  353.46   20.56
   3 -19 -10   38.76   11.63
   3 -19 -10   13.19   14.85
   3 -19  -9  398.62   21.14
   3 -19  -9  310.28   23.57
   3 -19  -8  203.72   18.89
   3 -19  -8  218.39   17.19
   3 -19  -7  145.13   14.52
   3 -19  -6  664.29   25.07
   3 -19  -5  314.39   18.27
  -3 -19   4  281.56   15.15
   3 -19  -4  279.35   16.78
  -3 -19   3  624.61   21.13
   3 -19  -3  611.15   22.95
  -3 -19   2   42.95    8.93
   3 -19  -2   48.65    9.77
  -3 -19   1  780.78   23.75
   3 -19  -1  768.54   24.50
  -3 -19   0   17.36    7.48
   3 -19   0   22.18    7.96
   3 -19   1   16.78    7.89
  -3 -19  -1   41.33    9.58
  -3 -19  -2  942.53   27.29
   3 -19   2 1065.90   26.84
  -3 -19  -3  282.33   16.56
  -3 -19  -4    2.17    8.23
  -3 -19  -5  776.63   25.96
  -3 -19  -6   65.02   11.87
  -3 -19  -7  258.17   17.28
  -3 -19  -8  566.47   23.32
  -3 -19  -9   21.01   10.39
  -3 -19 -10  161.76   14.66
  -3 -19 -10  140.19   17.52
   3 -18 -11  276.90   23.22
   3 -18 -11  238.77   16.68
   3 -18 -10   25.00   10.41
   3 -18 -10   -6.83   15.73
   3 -18  -9  152.20   18.19
   3 -18  -9  142.41   14.42
   3 -18  -8  144.37   14.39
   3 -18  -8  119.82   16.73
   3 -18  -7 1009.68   29.77
   3 -18  -6   60.37   10.71
   3 -18  -5  724.25   24.60
   3 -18  -4    7.63    8.33
  -3 -18   4    1.93    7.24
  -3 -18   3  329.24   15.26
   3 -18  -3  336.40   17.28
   3 -18  -2   59.78   10.01
  -3 -18   2   65.53    9.07
   3 -18  -1  824.28   24.11
  -3 -18   1  826.60   23.70
  -3 -18   0   99.96   10.47
   3 -18   0   72.81    9.60
   3 -18   1  566.72   19.69
  -3 -18  -1  603.36   21.20
   3 -18   2   32.24    7.53
  -3 -18  -2   44.70    8.84
  -3 -18  -3 1298.68   31.04
   3 -18   3 1328.63   28.09
  -3 -18  -4  259.02   15.48
  -3 -18  -5   11.01    8.96
  -3 -18  -6   19.73    8.85
  -3 -18  -7  766.41   25.48
  -3 -18  -8   93.39   11.76
  -3 -18  -9  518.55   21.87
  -3 -18 -10   78.30   11.56
  -3 -18 -10   55.83   13.81
  -3 -18 -11  498.75   25.71
   3 -17 -12  286.03   24.96
   3 -17 -11  452.61   27.23
   3 -17 -11  490.73   21.45
   3 -17 -10   -1.18    9.08
   3 -17 -10    5.86   13.51
   3 -17  -9  557.66   27.47
   3 -17  -9  578.84   23.09
   3 -17  -8   24.98    9.93
   3 -17  -8   16.00   11.95
   3 -17  -7  221.07   15.32
   3 -17  -6  212.94   14.79
   3 -17  -5  395.22   18.22
   3 -17  -4   29.04    8.44
  -3 -17   4   34.14    7.10
   3 -17  -3  742.36   23.09
  -3 -17   3  706.53   20.47
  -3 -17   2   36.34    7.50
   3 -17  -2   17.18    6.89
  -3 -17   1 1178.73   26.59
   3 -17  -1 1076.89   26.29
   3 -17   0  317.60   15.10
  -3 -17   0  337.39   15.24
  -3 -17  -1   39.00    8.56
   3 -17   1   39.08    7.92
  -3 -17  -2  215.30   13.40
   3 -17   2  209.39   12.04
   3 -17   3  338.18   14.48
  -3 -17  -3  344.13   16.41
  -3 -17  -4  110.37   10.99
  -3 -17  -5 1267.94   30.34
  -3 -17  -6    4.60    8.21
  -3 -17  -7  325.82   17.12
  -3 -17  -8  383.18   18.52
  -3 -17  -9   33.31   10.01
  -3 -17 -10   98.74   12.13
  -3 -17 -10   97.28   14.50
  -3 -17 -11  523.64   25.51
  -3 -17 -12   38.00   13.98
   3 -16 -12   29.76   16.06
   3 -16 -11  114.28   17.18
   3 -16 -11  125.93   12.64
   3 -16 -10 1037.63   36.14
   3 -16 -10 1043.61   29.00
   3 -16  -9   76.63   14.98
   3 -16  -9   67.80   11.01
   3 -16  -8  236.24   18.99
   3 -16  -8  183.47   14.21
   3 -16  -7  354.45   17.57
   3 -16  -6    6.72    7.50
   3 -16  -5  630.73   21.78
  -3 -16   5  656.00   18.79
   3 -16  -4  679.13   21.91
  -3 -16   4  689.56   19.18
   3 -16  -3   32.27    7.72
  -3 -16   3   29.52    6.86
   3 -16  -2 1232.94   27.69
  -3 -16   2 1197.86   25.57
   3 -16  -1   52.03    7.98
  -3 -16   1   48.15    7.69
   3 -16   0  202.13   11.78
  -3 -16   0  219.10   12.30
  -3 -16  -1  742.11   21.28
   3 -16   1  660.65   19.26
  -3 -16  -2  184.55   12.05
   3 -16   2  155.99   10.20
  -3 -16  -3  127.57   10.60
   3 -16   3  107.04    8.95
  -3 -16  -4  498.83   18.88
  -3 -16  -5   31.06    8.02
  -3 -16  -6 1220.61   29.12
  -3 -16  -7  471.61   19.37
  -3 -16  -8   63.50   10.09
  -3 -16  -9  371.00   17.18
  -3 -16 -10   34.82    8.90
  -3 -16 -10   28.65   10.76
  -3 -16 -11  259.43   20.01
  -3 -16 -12  605.53   28.31
   3 -15 -13   30.94   16.86
   3 -15 -12  557.29   29.87
   3 -15 -11   45.39    9.97
   3 -15 -11   35.68   13.93
   3 -15 -10   16.75    9.38
   3 -15 -10   20.87   13.90
   3 -15  -9    1.04   11.39
   3 -15  -9   15.18    8.13
   3 -15  -8  586.50   21.53
   3 -15  -8  641.00   26.50
   3 -15  -7   58.35   10.08
   3 -15  -6 2100.35   36.84
  -3 -15   5   83.41    8.18
   3 -15  -5   63.45    9.08
   3 -15  -4  552.23   19.07
  -3 -15   4  595.22   17.14
  -3 -15   3   96.68    8.59
   3 -15  -3  101.61    9.70
   3 -15  -2   40.52    7.28
  -3 -15   2   46.60    7.12
  -3 -15   1   23.03    6.38
   3 -15  -1   19.09    6.07
  -3 -15   0 1691.99   29.47
   3 -15   0 1664.92   29.29
  -3 -15  -1   87.19    8.68
   3 -15   1  118.04    9.01
  -3 -15  -2  844.42   22.17
   3 -15   2  810.21   19.69
  -3 -15  -3    7.10    6.41
   3 -15   3   22.86    5.92
  -3 -15  -4  349.46   15.69
  -3 -15  -5   62.49    8.96
  -3 -15  -6  282.96   14.79
  -3 -15  -7   46.01    9.02
  -3 -15  -8 1487.50   31.05
  -3 -15  -9   16.12    9.77
  -3 -15  -9    9.87    7.60
  -3 -15 -10  717.09   26.82
  -3 -15 -10  771.13   22.63
  -3 -15 -11   11.32   10.86
  -3 -15 -12   87.30   14.20
  -3 -15 -13   53.70   14.99
   3 -14 -13   68.05   17.51
   3 -14 -12  401.49   26.04
   3 -14 -11   57.28    9.93
   3 -14 -11   51.99   13.84
   3 -14 -10 1111.15   27.73
   3 -14 -10  999.41   33.85
   3 -14  -9  160.26   12.44
   3 -14  -9  105.77   15.15
   3 -14  -8  890.76   29.25
   3 -14  -8  964.85   25.82
   3 -14  -7  413.01   17.20
   3 -14  -6   15.73    7.22
   3 -14  -5  281.52   14.16
  -3 -14   5  254.81   11.25
   3 -14  -4  194.15   11.82
  -3 -14   4  173.71    9.73
   3 -14  -3  275.16   13.17
  -3 -14   3  303.90   12.37
  -3 -14   2 1698.20   27.75
   3 -14  -2 1674.02   29.62
   3 -14  -1  431.60   15.33
  -3 -14   1  493.83   15.57
   3 -14   0  146.92    9.60
  -3 -14   0  162.23   10.23
  -3 -14  -1  107.05    9.00
   3 -14   1  107.92    8.42
   3 -14   2  305.89   12.04
  -3 -14  -2  294.94   13.40
  -3 -14  -3  535.36   17.44
   3 -14   3  566.32   15.60
  -3 -14  -4 1460.38   28.21
   3 -14   4 1452.83   23.69
  -3 -14  -5  118.18    8.50
  -3 -14  -5  129.12   10.28
  -3 -14  -6 1873.66   28.78
  -3 -14  -6 1909.49   33.13
  -3 -14  -7  186.11   12.24
  -3 -14  -7  228.71   12.31
  -3 -14  -8   89.61    9.47
  -3 -14  -8  130.67   11.14
  -3 -14  -9  216.47   12.94
  -3 -14  -9  215.28   15.27
  -3 -14 -10  136.52   11.34
  -3 -14 -10  153.67   14.98
  -3 -14 -11  115.54   14.51
  -3 -14 -12  713.31   28.92
  -3 -14 -13   31.85   13.35
   3 -13 -14   66.73   17.85
   3 -13 -13   48.18   16.21
   3 -13 -12  204.19   20.27
   3 -13 -11  769.38   30.76
   3 -13 -11  756.43   22.30
   3 -13 -10   34.78   12.40
   3 -13 -10   16.39    8.34
   3 -13  -9 1247.73   28.12
   3 -13  -9 1295.95   35.67
   3 -13  -8  678.46   25.35
   3 -13  -8  650.73   20.84
   3 -13  -8  607.84   17.55
   3 -13  -7  260.37   13.99
   3 -13  -6  397.56   16.17
   3 -13  -5   25.26    6.76
  -3 -13   5   28.37    5.71
   3 -13  -4  716.45   19.97
  -3 -13   4  709.88   17.02
  -3 -13   3  982.29   20.06
   3 -13  -3  990.43   22.75
   3 -13  -2   63.77    7.82
  -3 -13   2   51.20    6.68
   3 -13  -1  339.61   13.02
  -3 -13   1  334.19   12.74
  -3 -13   0 1091.01   22.16
   3 -13   0 1111.87   22.06
  -3 -13  -1   25.82    5.87
   3 -13   1   34.38    5.89
  -3 -13  -2   24.36    6.08
   3 -13   2   34.02    5.59
  -3 -13  -2   25.46    4.74
  -3 -13  -3 1399.03   26.29
   3 -13   3 1403.90   22.57
  -3 -13  -3 1380.05   19.26
  -3 -13  -4  577.84   17.60
   3 -13   4  579.47   14.59
  -3 -13  -4  559.62   13.73
  -3 -13  -5 1077.76   24.08
  -3 -13  -5  984.15   19.34
  -3 -13  -6  709.70   19.83
  -3 -13  -6  727.42   17.97
  -3 -13  -7  950.23   22.09
  -3 -13  -7  928.85   22.78
  -3 -13  -8  218.54   12.24
  -3 -13  -8  210.11   12.72
  -3 -13  -9   92.55   10.70
  -3 -13  -9   95.45    9.18
  -3 -13  -9  109.45   12.04
  -3 -13 -10  575.43   18.07
  -3 -13 -10  520.48   20.71
  -3 -13 -10  515.02   22.21
  -3 -13 -11  293.00   18.49
  -3 -13 -11  260.96   17.31
  -3 -13 -12   -0.35   11.57
  -3 -13 -12   12.14   11.39
  -3 -13 -13  488.92   26.12
  -3 -13 -14   52.83   15.65
   3 -12 -14    1.01   15.42
   3 -12 -13  563.09   29.52
   3 -12 -12   25.70   13.39
   3 -12 -11  270.66   20.19
   3 -12 -11  304.81   14.58
   3 -12 -10   10.17   11.90
   3 -12 -10   -0.32    7.31
   3 -12  -9  318.73   19.77
   3 -12  -9  353.22   14.04
   3 -12  -9  343.60   15.40
   3 -12  -8   74.80    9.09
   3 -12  -8   79.51   11.97
   3 -12  -8   62.24    7.28
   3 -12  -7 1330.62   27.59
  -3 -12   6  107.90    7.59
   3 -12  -6  107.26    9.33
   3 -12  -5 2063.71   32.38
  -3 -12   5 2058.77   26.92
  -3 -12   4  151.88    8.47
   3 -12  -4  162.96   10.24
   3 -12  -3   76.55    7.68
  -3 -12   3   95.77    7.32
   3 -12  -2   13.33    5.26
  -3 -12   2   -2.66    4.21
   3 -12  -1  431.71   14.05
  -3 -12   1  442.60   13.70
   3 -12   0   53.92    6.44
  -3 -12   0   63.76    6.67
  -3 -12  -1 2971.21   35.03
   3 -12   1 3014.46   33.02
   3 -12   2  401.35   12.35
  -3 -12  -2  370.09   13.33
  -3 -12  -2  382.46    9.42
   3 -12   3  703.86   15.46
  -3 -12  -3  734.58   13.67
  -3 -12  -3  709.75   18.34
  -3 -12  -4   31.94    5.46
   3 -12   4   37.31    5.20
  -3 -12  -4   25.28    6.01
  -3 -12  -5    6.25    5.72
  -3 -12  -5    1.28    4.87
  -3 -12  -6  253.37   12.16
  -3 -12  -6  244.08   11.04
  -3 -12  -7  846.69   21.01
  -3 -12  -7  856.09   20.45
  -3 -12  -8  127.87    9.77
  -3 -12  -8  129.55   10.61
  -3 -12  -9 2428.82   41.75
  -3 -12  -9 2505.41   34.82
  -3 -12  -9 2374.46   38.24
  -3 -12 -10   -7.05    9.03
  -3 -12 -10   11.61    6.56
  -3 -12 -10    3.54    8.86
  -3 -12 -11  262.62   17.96
  -3 -12 -11  290.71   17.45
  -3 -12 -12    6.37   11.19
  -3 -12 -12   20.61   11.04
  -3 -12 -13   18.08   12.98
  -3 -12 -13   22.72   12.43
  -3 -12 -14   58.66   14.64
  -3 -12 -14   63.29   14.91
   3 -11 -14  273.55   23.25
   3 -11 -13   76.15   16.26
   3 -11 -12   68.85   15.42
   3 -11 -11  955.30   32.70
   3 -11 -11  986.50   22.77
   3 -11 -10   45.63    7.92
   3 -11 -10   54.08   12.45
   3 -11  -9 2152.98   33.74
   3 -11  -9 2085.04   42.41
   3 -11  -9 1995.38   30.08
   3 -11  -8  136.05    9.11
   3 -11  -8  115.14    9.90
   3 -11  -7   63.89    8.16
   3 -11  -7   48.42    9.88
   3 -11  -6  523.02   17.01
  -3 -11   6  522.79   13.45
   3 -11  -5   18.91    6.06
  -3 -11   5   19.12    4.72
   3 -11  -4  272.67   12.03
  -3 -11   4  290.35   10.52
   3 -11  -3 2581.39   33.30
  -3 -11   3 2652.18   29.66
   3 -11  -2   83.97    7.32
  -3 -11   2   75.58    6.38
  -3 -11   1 1187.64   20.92
   3 -11  -1 1260.05   22.23
   3 -11   0  214.40    9.64
  -3 -11   0  209.27    9.77
   3 -11   1   73.42    6.30
  -3 -11  -1   64.76    6.50
  -3 -11  -2  457.38   14.04
  -3 -11  -2  507.14   10.11
   3 -11   2  508.72   12.99
  -3 -11  -3 1009.28   20.67
   3 -11   3 1003.46   17.27
  -3 -11  -3  984.07   14.94
  -3 -11  -4   52.00    6.63
   3 -11   4   49.33    5.17
  -3 -11  -4   41.64    5.42
  -3 -11  -5 1552.20   26.34
  -3 -11  -5 1531.68   22.42
  -3 -11  -6  354.80   13.48
  -3 -11  -6  365.74   12.72
  -3 -11  -7 1025.07   21.66
  -3 -11  -7 1109.23   22.77
  -3 -11  -8  346.52   14.80
  -3 -11  -8  345.49   13.32
  -3 -11  -9   47.18    9.17
  -3 -11  -9   63.36    7.83
  -3 -11  -9   64.35   10.03
  -3 -11 -10  646.07   16.85
  -3 -11 -10  623.49   22.93
  -3 -11 -10  671.71   22.75
  -3 -11 -11  438.50   21.46
  -3 -11 -11  469.13   20.97
  -3 -11 -12   73.36   12.45
  -3 -11 -12   50.71   12.56
  -3 -11 -13  814.93   30.90
  -3 -11 -13  759.09   29.04
  -3 -11 -14   37.16   14.27
  -3 -11 -14   16.65   13.21
  -3 -11 -15   77.05   17.09
   3 -10 -15   83.29   18.26
   3 -10 -14   68.93   16.81
   3 -10 -13  545.86   27.80
   3 -10 -12  631.56   28.46
   3 -10 -11  116.46    9.32
   3 -10 -11  142.23   15.85
   3 -10 -10  490.32   22.84
   3 -10 -10  485.51   16.28
   3 -10 -10  488.51   16.70
   3 -10  -9   45.30    7.50
   3 -10  -9   40.31   10.86
   3 -10  -9   30.44    6.66
   3 -10  -8 1235.17   30.89
   3 -10  -8 1192.77   21.46
   3 -10  -8 1127.07   23.83
   3 -10  -7  477.90   15.81
   3 -10  -7  483.82   19.23
   3 -10  -7  463.85   13.13
   3 -10  -6   83.30    8.35
  -3 -10   6   88.68    6.20
  -3 -10   5  159.85    7.65
   3 -10  -5  146.46    9.31
  -3 -10   4  916.89   16.82
   3 -10  -4  903.57   19.73
   3 -10  -3  113.86    7.88
  -3 -10   3  107.16    6.74
   3 -10  -2 1925.08   27.08
  -3 -10   2 1879.01   24.37
   3 -10  -2 1963.17   26.89
  -3 -10   1  634.33   14.64
   3 -10  -1  660.75   15.66
   3 -10   0 1224.91   20.06
  -3 -10   0 1279.23   20.97
  -3 -10  -1  995.08   18.99
  -3 -10  -1  971.63   11.12
   3 -10   1 1032.59   17.91
   3 -10   2   98.31    6.26
  -3 -10  -2   92.23    7.00
  -3 -10  -2   87.56    4.76
  -3 -10  -3  414.24   13.10
  -3 -10  -3  436.67   10.06
   3 -10   3  409.24   10.78
  -3 -10  -4 1621.16   20.46
  -3 -10  -4 1677.23   25.59
   3 -10   4 1615.69   19.86
  -3 -10  -5   31.01    5.99
  -3 -10  -5   37.50    5.47
   3 -10   5   19.88    3.73
  -3 -10  -6  550.14   15.27
  -3 -10  -6  579.69   15.29
  -3 -10  -7  327.22   12.40
  -3 -10  -7  317.41   12.91
  -3 -10  -8  359.36   12.87
  -3 -10  -8  378.53   14.94
  -3 -10  -8  347.56   16.03
  -3 -10  -9  844.06   22.97
  -3 -10  -9  920.24   19.15
  -3 -10  -9  920.44   25.50
  -3 -10 -10  745.64   16.52
  -3 -10 -10  761.96   23.68
  -3 -10 -10  734.37   24.29
  -3 -10 -11  194.64   15.43
  -3 -10 -11  153.61   13.90
  -3 -10 -12  599.20   24.36
  -3 -10 -12  620.57   26.00
  -3 -10 -13   34.26   11.59
  -3 -10 -13   28.64   12.35
  -3 -10 -14  399.32   24.14
  -3 -10 -14  393.00   23.26
  -3 -10 -15  304.24   22.83
  -3 -10 -15  277.93   22.64
   3  -9 -15   58.98   17.53
   3  -9 -14  967.51   36.87
   3  -9 -13    4.38   12.86
   3  -9 -12  815.08   31.16
   3  -9 -11   75.94   12.98
   3  -9 -11   87.04    7.59
   3  -9 -10   79.56    8.52
   3  -9 -10   76.63   12.13
   3  -9 -10   88.85    8.24
   3  -9  -9   23.95    6.10
   3  -9  -9   25.47   10.19
   3  -9  -9   15.28    5.54
   3  -9  -8 1168.65   29.41
   3  -9  -8 1180.67   20.86
   3  -9  -8 1111.49   22.64
   3  -9  -7  277.05   12.02
   3  -9  -7  310.68   15.81
   3  -9  -7  293.38   10.29
  -3  -9   6 1544.44   20.75
   3  -9  -6 1496.41   25.62
  -3  -9   5   54.01    5.18
   3  -9  -5   45.09    6.46
  -3  -9   4 1829.66   22.65
   3  -9  -4 1854.19   27.01
   3  -9  -3  727.71   16.76
  -3  -9   3  744.80   14.79
   3  -9  -2  323.78   11.24
  -3  -9   2  347.35   10.36
   3  -9  -2  369.02   11.87
  -3  -9   1  328.70   10.37
   3  -9  -1  361.46   11.34
   3  -9   0 1191.10   19.09
  -3  -9   0 1156.87   19.19
   3  -9   1  285.73    9.44
  -3  -9  -1  300.03    5.95
  -3  -9  -1  284.00   10.22
  -3  -9  -2 3177.99   21.02
  -3  -9  -2 3153.62   32.43
   3  -9   2 3145.25   28.21
   3  -9   3  597.97   12.15
  -3  -9  -3  590.13   10.90
  -3  -9  -3  604.42   14.87
  -3  -9  -4  347.08   11.75
   3  -9   4  370.15    9.36
  -3  -9  -4  394.48   10.27
  -3  -9  -5   29.52    5.27
   3  -9   5   29.09    3.62
  -3  -9  -5   28.42    5.26
  -3  -9  -6  784.00   17.27
  -3  -9  -6  818.80   17.70
  -3  -9  -7  126.10    7.94
  -3  -9  -7  123.33    8.97
  -3  -9  -8 1628.34   24.32
  -3  -9  -8 1570.73   28.20
  -3  -9  -8 1708.49   31.48
  -3  -9  -9   62.05    6.52
  -3  -9  -9   52.83    9.23
  -3  -9  -9   68.17    9.77
  -3  -9 -10 1839.83   35.18
  -3  -9 -10 1873.73   36.83
  -3  -9 -11   65.52   11.53
  -3  -9 -11   81.74   12.19
  -3  -9 -12  140.37   15.22
  -3  -9 -12  134.58   14.67
  -3  -9 -13   41.37   12.86
  -3  -9 -13   45.36   13.04
  -3  -9 -14  293.22   21.23
  -3  -9 -14  314.52   21.78
  -3  -9 -15   50.13   14.12
  -3  -9 -15   27.47   14.37
   3  -8 -15   37.68   15.30
   3  -8 -14   58.06   15.41
   3  -8 -13  234.84   20.12
   3  -8 -12  434.19   23.11
   3  -8 -11    4.87    7.06
   3  -8 -11    2.11   10.01
   3  -8 -10 1110.47   20.93
   3  -8 -10 1052.89   30.56
   3  -8 -10 1133.27   23.18
   3  -8  -9  106.34    8.26
   3  -8  -9   91.92   11.93
   3  -8  -9  104.49    8.32
   3  -8  -8  703.26   22.77
   3  -8  -8  713.68   17.66
   3  -8  -8  714.60   16.17
   3  -8  -7  718.77   21.80
   3  -8  -7  757.91   18.06
   3  -8  -7  728.19   14.77
  -3  -8   7  689.72   14.07
   3  -8  -6   62.48    6.62
  -3  -8   6   66.23    5.42
   3  -8  -6   52.10    5.17
   3  -8  -5 1557.09   24.78
  -3  -8   5 1613.66   20.48
   3  -8  -4 3892.36   37.65
  -3  -8   4 3806.58   31.21
   3  -8  -3  120.89    7.43
  -3  -8   3  132.00    6.67
   3  -8  -2 1637.17   23.05
  -3  -8   2 1662.72   21.02
   3  -8  -2 1634.55   22.34
   3  -8  -1  324.23   10.33
  -3  -8   1  313.49    9.72
   3  -8   0 1730.79   21.97
  -3  -8   0 1730.40   22.06
   3  -8   1 1028.72   16.33
  -3  -8  -1 1039.86    9.01
  -3  -8  -1 1044.55   17.72
  -3  -8  -2  266.48    9.56
  -3  -8  -2  264.38    6.16
   3  -8   2  267.50    8.40
  -3  -8  -3   88.13    6.45
  -3  -8  -3   75.44    4.63
   3  -8   3   82.48    5.07
  -3  -8  -4 1893.87   24.86
   3  -8   4 1876.16   19.10
  -3  -8  -4 1873.39   20.72
  -3  -8  -5   47.50    5.55
  -3  -8  -5   44.86    5.62
   3  -8   5   43.27    3.72
  -3  -8  -6 1149.17   19.51
  -3  -8  -6 1083.09   19.77
  -3  -8  -7  424.06   12.31
  -3  -8  -7  438.18   14.29
  -3  -8  -7  442.25   15.31
  -3  -8  -8  415.25   12.00
  -3  -8  -8  387.72   15.04
  -3  -8  -8  362.26   15.32
  -3  -8  -9  477.94   12.24
  -3  -8  -9  421.55   16.83
  -3  -8  -9  444.85   17.74
  -3  -8 -10  480.38   19.54
  -3  -8 -10  438.82   18.45
  -3  -8 -11  115.80   12.87
  -3  -8 -11  113.56   12.46
  -3  -8 -12  636.21   25.01
  -3  -8 -12  599.22   24.26
  -3  -8 -13   55.17   13.04
  -3  -8 -13   81.38   13.42
  -3  -8 -14  620.01   27.80
  -3  -8 -14  668.47   28.98
  -3  -8 -15   85.51   15.82
  -3  -8 -15   60.46   16.21
  -3  -8 -16   25.50   15.09
   3  -7 -15   44.63   16.18
   3  -7 -14  365.54   23.90
   3  -7 -13  109.12   15.52
   3  -7 -12  250.78   18.45
   3  -7 -11  982.05   30.43
   3  -7 -11  960.20   22.88
   3  -7 -10   70.11    7.80
   3  -7 -10   56.64    6.19
   3  -7  -9 1246.69   21.46
   3  -7  -9 1253.23   30.39
   3  -7  -9 1160.22   21.43
   3  -7  -8  104.95    7.43
   3  -7  -8   75.22   10.04
   3  -7  -8   90.34    7.34
   3  -7  -7  620.87   19.92
  -3  -7   7  604.88   13.17
   3  -7  -7  588.50   15.38
   3  -7  -7  584.85   13.17
  -3  -7   6  907.42   15.33
   3  -7  -6  897.23   18.47
   3  -7  -6  896.21   14.62
   3  -7  -5  148.09    8.28
  -3  -7   5  178.48    7.32
   3  -7  -4  230.10    9.84
  -3  -7   4  220.15    7.81
   3  -7  -3 1657.87   23.13
  -3  -7   3 1689.30   20.26
   3  -7  -3 1654.88   22.25
   3  -7  -2  332.59   10.38
  -3  -7   2  357.54    9.86
   3  -7  -2  362.21   10.72
   3  -7  -1 1134.54   17.86
  -3  -7   1 1175.12   17.30
   3  -7   0  274.83    8.80
  -3  -7   0  237.54    8.44
   3  -7   1   88.74    5.43
  -3  -7  -1   89.39    2.61
  -3  -7  -1  104.42    6.26
  -3  -7  -2 2877.23   17.43
  -3  -7  -2 2812.69   27.92
   3  -7   2 2754.15   24.20
  -3  -7  -3 1106.44   17.89
  -3  -7  -3 1103.71   13.51
   3  -7   3 1148.83   15.09
   3  -7   4  247.17    7.05
  -3  -7  -4  222.61    7.71
  -3  -7  -4  250.41    9.27
  -3  -7  -5 6437.68   41.74
  -3  -7  -5 6385.79   42.89
  -3  -7  -6  122.98    7.02
  -3  -7  -6  105.97    7.59
  -3  -7  -7  412.05   11.36
  -3  -7  -7  375.82   14.45
  -3  -7  -7  391.53   13.58
  -3  -7  -8  706.78   14.18
  -3  -7  -8  703.66   19.19
  -3  -7  -8  731.90   20.28
  -3  -7  -9  392.74   16.16
  -3  -7  -9  416.68   10.16
  -3  -7  -9  407.90   16.86
  -3  -7 -10  104.67   11.55
  -3  -7 -10   91.48   10.50
  -3  -7 -11  967.21   28.20
  -3  -7 -11  917.22   27.01
  -3  -7 -12   91.34   12.69
  -3  -7 -12   94.58   12.63
  -3  -7 -13  516.18   24.35
  -3  -7 -13  596.40   25.43
  -3  -7 -14  174.00   17.62
  -3  -7 -14  217.20   19.47
  -3  -7 -15   78.47   15.95
  -3  -7 -15   70.86   15.95
  -3  -7 -16  271.64   24.12
   3  -6 -16   63.72   17.48
   3  -6 -15  393.90   26.37
   3  -6 -14    1.62   12.45
   3  -6 -13 1577.12   41.85
   3  -6 -12   42.58   12.23
   3  -6 -11   26.21    7.49
   3  -6 -11   33.47   11.18
   3  -6 -10   16.50    5.90
   3  -6 -10   27.67    4.75
   3  -6 -10   20.29    9.16
   3  -6  -9   17.21    4.75
   3  -6  -9   21.99    5.39
   3  -6  -9   18.17    8.27
   3  -6  -8   22.92    4.98
   3  -6  -8   17.39    7.92
   3  -6  -8   33.68    5.13
   3  -6  -7 3539.31   30.71
   3  -6  -7 3566.13   44.08
  -3  -6   7 3422.63   29.43
   3  -6  -7 3523.31   34.80
  -3  -6   6  132.31    6.63
   3  -6  -6  129.38    7.77
   3  -6  -6  122.60    9.85
   3  -6  -6  112.93    5.90
  -3  -6   5 2733.94   25.39
   3  -6  -5 2697.64   29.92
   3  -6  -5 2702.77   21.68
  -3  -6   4   16.58    3.53
   3  -6  -4   17.80    4.46
   3  -6  -3  265.27    9.69
   3  -6  -3  273.18    9.34
  -3  -6   3  264.95    8.27
   3  -6  -2    5.89    3.77
  -3  -6   2    2.68    3.10
   3  -6  -2    7.18    4.05
   3  -6  -1  462.26   11.35
  -3  -6   1  446.64   10.47
  -3  -6   0   68.30    5.17
   3  -6   0   74.88    5.05
  -3  -6  -1 3925.02   30.96
   3  -6   1 3808.66   28.72
   3  -6   2  279.11    7.82
  -3  -6  -2  257.62    5.43
  -3  -6  -2  267.15    8.66
  -3  -6  -3 2500.51   25.30
  -3  -6  -3 2501.99   19.66
   3  -6   3 2451.93   21.00
  -3  -6  -4  166.59    7.32
   3  -6   4  180.57    5.99
  -3  -6  -4  173.21    6.77
  -3  -6  -5   92.89    5.90
   3  -6   5   95.30    4.42
  -3  -6  -5   94.57    6.60
  -3  -6  -6   17.60    5.36
  -3  -6  -6   29.42    4.50
   3  -6   6   24.78    2.90
  -3  -6  -6   20.88    5.45
  -3  -6  -7 1240.96   17.55
  -3  -6  -7 1193.49   22.31
  -3  -6  -7 1215.05   23.91
  -3  -6  -8    9.76    6.36
  -3  -6  -8   14.81    3.77
  -3  -6  -8   21.45    6.79
  -3  -6  -9 1344.13   27.60
  -3  -6  -9 1387.01   29.09
  -3  -6 -10  128.55   11.65
  -3  -6 -10  104.23   11.26
  -3  -6 -11  589.17   22.18
  -3  -6 -11  567.34   21.84
  -3  -6 -12   39.96   10.44
  -3  -6 -12   47.43   11.52
  -3  -6 -13  207.68   17.72
  -3  -6 -13  190.35   16.18
  -3  -6 -14   12.64   11.34
  -3  -6 -14   29.31   12.45
  -3  -6 -15  591.32   28.78
  -3  -6 -15  536.84   27.99
  -3  -6 -16  111.56   19.35
  -3  -6 -16  160.94   19.54
   3  -5 -16  200.95   22.38
   3  -5 -15  460.92   27.10
   3  -5 -14  153.25   17.24
   3  -5 -13   40.13   12.08
   3  -5 -12  473.18   17.91
   3  -5 -12  507.76   23.63
   3  -5 -11  723.43   25.77
   3  -5 -11  813.34   21.05
   3  -5 -10   55.69    7.17
   3  -5 -10   51.47   10.20
   3  -5  -9  641.83   16.06
   3  -5  -9  587.02   20.90
   3  -5  -9  660.23   13.58
   3  -5  -8  217.09   13.06
  -3  -5   8  218.25    8.36
   3  -5  -8  234.57    9.54
   3  -5  -8  217.81    8.92
   3  -5  -7  924.75   17.26
  -3  -5   7  893.58   15.32
   3  -5  -7  823.08   21.67
   3  -5  -7  895.92   15.37
  -3  -5   6  224.75    7.85
   3  -5  -6  227.56    9.27
   3  -5  -6  271.53   12.46
   3  -5  -6  223.63    7.49
  -3  -5   5 2482.83   23.96
   3  -5  -5 2403.23   27.02
   3  -5  -5 2555.13   20.06
   3  -5  -4  679.07   14.50
   3  -5  -4  613.78    8.78
  -3  -5   4  618.83   11.97
   3  -5  -3 1715.67   22.15
  -3  -5   3 1711.92   19.34
   3  -5  -3 1705.78   20.52
   3  -5  -2   98.88    5.76
  -3  -5   2   96.04    5.34
   3  -5  -2   91.03    5.81
   3  -5  -1 2680.10   25.91
  -3  -5   1 2744.64   24.30
   3  -5   0  271.94    8.37
  -3  -5   0  266.74    8.16
  -3  -5  -1    4.16    2.99
   3  -5   1    3.50    2.99
   3  -5   2  220.13    6.88
  -3  -5  -2  209.82    4.84
  -3  -5  -2  218.10    7.66
  -3  -5  -3 1235.50   17.07
   3  -5   3 1235.54   14.48
  -3  -5  -3 1235.91   13.80
   3  -5   4  188.95    5.80
  -3  -5  -4  177.72    6.98
  -3  -5  -4  179.60    6.98
  -3  -5  -5 3101.85   28.95
   3  -5   5 3149.46   21.10
  -3  -5  -5 3171.72   26.92
   3  -5   6  541.41    8.81
  -3  -5  -6  536.68   11.24
  -3  -5  -6  521.89   13.80
  -3  -5  -6  530.72   14.99
  -3  -5  -7  565.45   10.89
  -3  -5  -7  585.50   16.05
  -3  -5  -7  578.87   16.46
  -3  -5  -8 1046.20   22.78
  -3  -5  -8 1046.79   13.01
  -3  -5  -8 1045.49   23.72
  -3  -5  -9   33.58    8.02
  -3  -5  -9   42.74    8.38
  -3  -5 -10  280.45   15.22
  -3  -5 -10  262.47   14.67
  -3  -5 -11 1149.30   30.02
  -3  -5 -11 1218.26   30.54
  -3  -5 -12  216.96   16.39
  -3  -5 -12  238.95   16.51
  -3  -5 -13  640.26   26.34
  -3  -5 -13  748.80   28.14
  -3  -5 -14  151.24   16.40
  -3  -5 -14  166.17   17.73
  -3  -5 -15  261.62   22.21
  -3  -5 -15  280.83   21.07
  -3  -5 -16   38.15   14.82
  -3  -5 -16   88.32   17.98
   3  -4 -16  396.09   26.95
   3  -4 -15  328.97   23.56
   3  -4 -14   14.09   12.31
   3  -4 -13  277.97   20.14
   3  -4 -12  298.21   14.90
   3  -4 -12  316.19   19.47
   3  -4 -11  264.98   16.95
   3  -4 -11  247.14   12.84
   3  -4 -10 1228.40   23.64
   3  -4 -10 1258.17   30.74
   3  -4  -9  180.18    6.78
   3  -4  -9  161.62    8.96
   3  -4  -9  174.32   12.77
   3  -4  -8  502.93   13.00
  -3  -4   8  515.86   11.93
   3  -4  -8  469.75   17.33
   3  -4  -8  518.94   11.84
   3  -4  -7  336.73    9.94
   3  -4  -7  328.44   10.02
  -3  -4   7  303.77    9.21
   3  -4  -7  324.59   14.09
   3  -4  -6    1.26    3.16
  -3  -4   6   -0.02    3.03
   3  -4  -6   -3.50    3.82
  -3  -4   5 1371.75   17.63
   3  -4  -5 1441.38   20.33
   3  -4  -5 1443.90   14.99
   3  -4  -4 3642.30   31.49
  -3  -4   4 3606.05   27.90
   3  -4  -4 3598.19   19.74
   3  -4  -3   96.46    6.09
  -3  -4   3   94.25    5.15
   3  -4  -3   78.20    5.35
   3  -4  -2 3360.65   25.68
   3  -4  -2 3224.37   28.28
  -3  -4   2 3311.64   25.99
   3  -4  -1  562.01   11.86
  -3  -4   1  551.45   10.85
   3  -4   0 3635.70   27.91
  -3  -4   0 3624.34   27.15
   3  -4   1 1587.03   17.73
  -3  -4  -1 1547.83   17.89
  -3  -4  -2  313.91    8.56
  -3  -4  -2  297.40    5.89
   3  -4   2  318.22    7.98
  -3  -4  -3 1542.68   15.79
   3  -4   3 1616.24   16.38
  -3  -4  -3 1571.14   18.15
   3  -4   4  952.89   12.26
  -3  -4  -4  938.51   14.40
  -3  -4  -4  937.37   13.98
  -3  -4  -5  133.91    5.87
  -3  -4  -5  123.97    7.04
   3  -4   5  124.35    4.74
  -3  -4  -5  137.68    7.70
  -3  -4  -6 2463.30   28.90
   3  -4   6 2489.88   19.00
  -3  -4  -6 2544.76   21.37
  -3  -4  -6 2641.27   30.90
  -3  -4  -7  213.87    6.10
  -3  -4  -7  229.15   10.94
  -3  -4  -7  232.03   11.11
  -3  -4  -8   66.86    2.51
  -3  -4  -8   62.90    7.93
  -3  -4  -8   65.47    8.16
  -3  -4  -9  168.08   11.78
  -3  -4  -9  173.96   11.66
  -3  -4 -10  473.22   18.66
  -3  -4 -10  481.37   19.06
  -3  -4 -11  370.51   18.39
  -3  -4 -11  372.98   18.00
  -3  -4 -12  785.97   26.76
  -3  -4 -12  764.80   26.63
  -3  -4 -13  499.06   23.25
  -3  -4 -13  495.41   23.67
  -3  -4 -14  814.40   30.59
  -3  -4 -14  736.92   30.07
  -3  -4 -15  121.48   16.70
  -3  -4 -15   92.60   17.09
  -3  -4 -16   -0.37   14.48
  -3  -4 -16   40.64   15.15
   3  -3 -16  237.87   21.98
   3  -3 -15   -6.62   14.17
   3  -3 -14 1101.27   36.34
   3  -3 -13   19.91   10.65
   3  -3 -12 1161.89   32.96
   3  -3 -12 1123.48   26.57
   3  -3 -11   11.11    7.27
   3  -3 -11    8.02    8.42
   3  -3 -10   60.95    7.35
   3  -3 -10   62.46    9.97
   3  -3  -9  397.38    7.85
   3  -3  -9  414.85   17.39
   3  -3  -9  416.90   13.36
  -3  -3   8  621.19   13.05
   3  -3  -8  634.12   19.62
   3  -3  -8  596.46   11.34
   3  -3  -8  651.90   14.79
  -3  -3   7  270.95    8.63
   3  -3  -7  276.98    9.16
   3  -3  -7  285.86   12.93
   3  -3  -7  274.93    8.52
   3  -3  -6 2683.83   33.51
   3  -3  -6 2535.46   22.47
   3  -3  -6 2612.88   25.55
  -3  -3   6 2496.32   24.08
   3  -3  -5  589.92    9.67
  -3  -3   5  594.89   11.71
   3  -3  -5  583.88   14.91
   3  -3  -5  565.09   12.41
   3  -3  -4  896.67    9.70
  -3  -3   4  880.10   13.83
   3  -3  -4  881.35   15.36
  -3  -3   3  263.52    7.83
   3  -3  -3  281.45    8.09
   3  -3  -3  293.63    9.06
   3  -3  -3  296.65    4.46
  -3  -3   2  401.61    9.26
   3  -3  -2  402.23    9.05
   3  -3  -2  429.21   10.42
  -3  -3   1   95.41    4.97
   3  -3  -1  102.40    5.55
  -3  -3   0 5958.79   33.40
   3  -3   0 5885.64   34.57
   3  -3   1  326.81    8.30
  -3  -3  -1  319.54    8.22
  -3  -3  -2 5690.23   26.01
  -3  -3  -2 5702.52   32.61
   3  -3   2 5726.63   31.50
  -3  -3  -3  448.89    9.01
   3  -3   3  460.46    8.99
  -3  -3  -3  433.78    9.18
  -3  -3  -4 1164.07   14.43
   3  -3   4 1159.77   13.55
  -3  -3  -4 1150.44   17.03
  -3  -3  -4 1112.43   15.94
  -3  -3  -5  150.36    5.50
  -3  -3  -5  166.57    8.05
   3  -3   5  163.26    5.51
  -3  -3  -5  159.08    7.86
  -3  -3  -6  302.93    6.80
   3  -3   6  318.51    7.35
  -3  -3  -6  322.44   11.37
  -3  -3  -6  329.26   11.64
  -3  -3  -7  133.65    8.96
   3  -3   7  142.78    5.43
  -3  -3  -7  150.98    9.60
  -3  -3  -7  160.18    3.91
  -3  -3  -8 1907.65   30.61
  -3  -3  -8 1950.35   31.37
  -3  -3  -9  129.37   11.04
  -3  -3  -9  155.74   11.20
  -3  -3 -10 1003.54   26.23
  -3  -3 -10 1051.43   26.83
  -3  -3 -11   50.95   10.98
  -3  -3 -11   34.24    9.41
  -3  -3 -12   26.16    9.98
  -3  -3 -12   34.68   11.21
  -3  -3 -13   -1.28   11.44
  -3  -3 -13    2.62   10.54
  -3  -3 -14  363.65   22.38
  -3  -3 -14  350.47   21.89
  -3  -3 -15   43.12   13.67
  -3  -3 -15   24.67   15.45
  -3  -3 -16  835.70   35.87
  -3  -3 -16  832.50   34.95
   3  -2 -16  626.26   31.87
   3  -2 -15   77.23   15.16
   3  -2 -14  124.40   16.43
   3  -2 -13  187.35   14.28
   3  -2 -13  146.50   15.65
   3  -2 -12   89.52   10.60
   3  -2 -12  111.09   13.88
   3  -2 -11  113.23   12.42
   3  -2 -11   96.94    9.68
   3  -2 -10 1201.18   23.98
   3  -2 -10 1226.28   29.41
   3  -2  -9  155.82    9.19
  -3  -2   9  142.49    7.32
   3  -2  -8  473.45    8.73
  -3  -2   8  482.20   11.66
   3  -2  -8  461.42   16.69
   3  -2  -8  478.90   13.15
   3  -2  -7  776.46   14.75
   3  -2  -7  780.01   19.67
  -3  -2   7  804.73   14.30
   3  -2  -7  776.79   12.51
   3  -2  -6  544.67   11.19
  -3  -2   6  556.74   11.57
   3  -2  -6  558.58   11.27
   3  -2  -6  569.47   15.76
   3  -2  -5  358.14   12.00
  -3  -2   5  361.18    9.23
   3  -2  -5  369.90    9.63
   3  -2  -5  380.13    8.09
   3  -2  -4 1302.59   11.89
  -3  -2   4 1347.72   16.94
   3  -2  -4 1249.90   17.27
   3  -2  -3  855.46    6.96
  -3  -2   3  836.87   13.18
   3  -2  -3  771.50   12.05
   3  -2  -3  837.92   14.04
   3  -2  -2 9991.76   47.33
  -3  -2   2 9983.55   44.32
   3  -2  -1 1821.32   19.88
  -3  -2   1 1767.32   18.21
  -3  -2   0  634.03   10.88
   3  -2   0  671.38   11.91
   3  -2   1  154.98    6.02
  -3  -2  -1  153.72    5.73
   3  -2   2  271.09    7.44
  -3  -2  -2  298.89    7.41
  -3  -2  -3 1248.95   15.45
  -3  -2  -3 1251.66   14.24
   3  -2   3 1220.94   14.76
  -3  -2  -3 1268.37   15.88
  -3  -2  -4 1842.11   16.49
  -3  -2  -4 1838.61   20.95
   3  -2   4 1847.27   17.42
  -3  -2  -4 1911.98   21.56
  -3  -2  -5   46.00    3.14
  -3  -2  -5   39.48    5.27
   3  -2   5   44.25    3.49
  -3  -2  -5   48.82    5.50
  -3  -2  -6  975.36    8.90
   3  -2   6  962.73   12.86
  -3  -2  -6  952.11   18.71
  -3  -2  -6  939.82   18.71
  -3  -2  -7  362.39   13.31
   3  -2   7  366.83    8.35
  -3  -2  -7  349.49   13.06
  -3  -2  -8   51.24    7.69
  -3  -2  -8   38.43    7.26
  -3  -2  -9  815.08   22.27
  -3  -2  -9  787.14   21.80
  -3  -2 -10  377.71   17.09
  -3  -2 -10  382.77   17.38
  -3  -2 -11  183.13   14.06
  -3  -2 -11  189.63   14.44
  -3  -2 -12 1899.25   39.93
  -3  -2 -12 1891.58   40.98
  -3  -2 -13   33.10   12.09
  -3  -2 -13   52.37   11.59
  -3  -2 -14  323.32   22.05
  -3  -2 -14  365.26   22.08
  -3  -2 -15  330.46   23.28
  -3  -2 -15  335.08   23.29
  -3  -2 -16  122.52   18.70
  -3  -2 -16   98.18   17.75
   3  -1 -16   51.48   15.31
   3  -1 -15  296.57   22.46
   3  -1 -14  461.43   24.98
   3  -1 -13   42.22   10.86
   3  -1 -13   36.75   11.18
   3  -1 -12  207.97   16.55
   3  -1 -12  219.21   14.11
   3  -1 -11  839.77   26.32
   3  -1 -11  887.27   22.91
   3  -1 -10   12.59    8.18
   3  -1 -10   25.75    6.82
   3  -1  -9 2222.85   30.37
   3  -1  -9 2186.72   35.84
  -3  -1   9 2266.65   25.97
  -3  -1   8  249.72    8.89
   3  -1  -8  249.56    4.68
   3  -1  -8  271.94   13.17
   3  -1  -8  268.22   10.46
   3  -1  -7  168.92    5.55
   3  -1  -7  184.33    8.16
  -3  -1   7  178.95    7.38
   3  -1  -7  180.82   10.42
   3  -1  -6 1260.10   15.26
   3  -1  -6 1261.35   22.10
  -3  -1   6 1279.96   17.42
   3  -1  -6 1312.22   17.31
   3  -1  -5   34.05    3.62
  -3  -1   5   28.27    3.88
   3  -1  -5   37.02    5.66
   3  -1  -5   32.65    3.69
   3  -1  -4   17.29    3.50
  -3  -1   4   17.26    3.26
   3  -1  -4   19.63    4.61
   3  -1  -4   26.69    2.82
  -3  -1   3 2934.48   24.55
   3  -1  -3 2972.25   14.47
   3  -1  -3 3065.40   22.57
   3  -1  -3 2865.09   24.63
  -3  -1   2  132.07    5.68
   3  -1  -2  136.83    6.15
  -3  -1   1 1950.78   18.89
   3  -1  -1 1978.39   20.16
   3  -1   0 2699.62   23.04
  -3  -1   0 2749.33   21.63
  -3  -1  -1  568.24    9.86
   3  -1   1  558.93   10.59
  -3  -1  -2 1288.01   14.02
  -3  -1  -2 1345.98   14.28
   3  -1   2 1285.84   15.41
  -3  -1  -3 2754.95   23.27
  -3  -1  -3 2755.77   23.98
  -3  -1  -3 2768.67   19.43
   3  -1   3 2805.63   22.05
  -3  -1  -4  530.61    8.05
  -3  -1  -4  519.83   12.04
  -3  -1  -4  488.84   11.49
   3  -1   4  545.47    9.90
   3  -1   5 1400.76   15.60
  -3  -1  -5 1370.50   20.87
  -3  -1  -5 1421.55   11.36
  -3  -1  -5 1426.78   10.67
  -3  -1  -5 1377.00   20.74
   3  -1   6  350.38    8.26
  -3  -1  -6  311.71   11.70
  -3  -1  -6  324.86   11.68
   3  -1   7 2649.81   22.46
  -3  -1  -7 2576.21   33.56
  -3  -1  -7 2664.48   33.70
   3  -1   8  532.85   10.78
  -3  -1  -8  535.28   17.38
  -3  -1  -8  549.40   17.28
  -3  -1  -9  394.43   16.24
  -3  -1  -9  410.58   16.69
  -3  -1 -10  472.22   18.59
  -3  -1 -10  465.14   19.22
  -3  -1 -11  365.97   17.95
  -3  -1 -11  363.31   18.67
  -3  -1 -12    6.47    9.30
  -3  -1 -12    0.06   10.31
  -3  -1 -13  891.32   31.23
  -3  -1 -13  910.56   30.68
  -3  -1 -14   81.53   14.41
  -3  -1 -14  118.97   16.05
  -3  -1 -15  119.89   18.05
  -3  -1 -15  150.46   18.16
  -3  -1 -16  365.22   25.40
  -3  -1 -16  361.33   25.87
   3   0 -16   13.06   14.10
   3   0 -15  580.82   28.80
   3   0 -14   81.33   14.67
   3   0 -13  362.86   18.76
   3   0 -13  361.55   20.98
   3   0 -12    6.59    8.16
   3   0 -12   -7.12   10.49
   3   0 -11 1044.30   25.33
   3   0 -11 1045.06   28.64
   3   0 -10   -2.00    6.13
  -3   0  10   -0.39    4.25
   3   0 -10   -0.69    7.30
   3   0  -9 1244.33   23.56
  -3   0   9 1162.29   19.31
   3   0  -9 1157.46   26.14
  -3   0   8  110.16    6.53
   3   0  -8  106.08    7.91
   3   0  -8  114.24    9.57
   3   0  -7 1679.39   22.95
  -3   0   7 1579.73   20.42
   3   0  -7 1606.77   12.47
   3   0  -7 1532.55   25.81
   3   0  -6   66.51    5.54
   3   0  -6   68.14    6.71
   3   0  -6   68.73    3.85
  -3   0   6   71.67    5.14
   3   0  -5 2384.84   21.90
   3   0  -5 2257.54   19.83
   3   0  -5 2371.06   26.52
  -3   0   5 2305.37   22.82
   3   0  -4  119.89    4.89
   3   0  -4  131.18    5.55
  -3   0   4  110.92    5.62
   3   0  -4  116.39    6.59
   3   0  -3  393.77    9.31
   3   0  -3  412.77    8.10
   3   0  -3  409.79    9.20
  -3   0   3  398.13    9.47
   3   0  -2   31.08    3.76
  -3   0   2   28.64    3.73
   3   0  -1 5486.83   32.82
  -3   0   1 5565.59   32.11
  -3   0   0    5.76    1.65
   3   0   0    2.41    2.91
  -3   0   0    1.76    2.67
   3   0   1 8824.55   40.55
  -3   0  -1 8725.25   30.52
  -3   0  -2    7.27    2.55
   3   0   2    9.59    2.94
  -3   0  -2   13.11    2.48
  -3   0  -3 3718.67   27.25
   3   0   3 3770.96   25.79
  -3   0  -3 3791.42   20.81
  -3   0  -4   52.81    2.53
   3   0   4   57.22    4.13
  -3   0  -4   56.22    5.05
  -3   0  -4   51.39    5.37
   3   0   5  380.59    8.73
  -3   0  -5  359.35   11.14
  -3   0  -5  363.61   11.76
  -3   0  -6    2.81    4.78
   3   0   6    8.09    2.84
  -3   0  -6   10.06    5.71
  -3   0  -7  957.55   20.79
  -3   0  -7 1010.55   21.90
   3   0   7 1020.04   14.60
  -3   0  -8  184.13   11.35
  -3   0  -8  153.73   10.92
   3   0   8  173.39    6.93
  -3   0  -9 1481.47   29.40
  -3   0  -9 1387.06   29.36
  -3   0 -10    6.49    7.42
  -3   0 -10    4.03    7.82
  -3   0 -11  123.79   12.26
  -3   0 -11  174.25   14.28
  -3   0 -12   38.47   10.46
  -3   0 -12   70.36   12.29
  -3   0 -13   72.32   13.18
  -3   0 -13   92.53   14.80
  -3   0 -14   62.28   13.68
  -3   0 -14   38.84   13.96
  -3   0 -15 1158.02   38.92
  -3   0 -15 1094.01   39.05
  -3   0 -16   15.15   14.72
  -3   0 -16   45.01   15.24
   3   1 -16   38.47   16.52
   3   1 -15  258.56   21.78
   3   1 -14  429.14   21.58
   3   1 -14  525.17   25.68
   3   1 -13   50.04   10.68
   3   1 -13   23.05   10.79
   3   1 -12  246.54   15.33
   3   1 -12  203.44   15.98
   3   1 -11  840.30   23.61
   3   1 -11  850.65   26.05
   3   1 -10   36.38    7.97
  -3   1  10   25.18    5.07
   3   1 -10   13.79    8.04
   3   1  -9 2237.89   32.51
  -3   1   9 2183.98   26.91
   3   1  -9 2171.83   35.20
   3   1  -8  241.14   11.03
  -3   1   8  251.25    9.35
   3   1  -8  248.83   12.42
   3   1  -7  150.41    8.58
  -3   1   7  169.90    7.58
   3   1  -7  179.70   10.06
   3   1  -6 1287.88   19.47
   3   1  -6 1222.76   20.90
  -3   1   6 1245.26   17.90
   3   1  -6 1237.21   11.66
   3   1  -5   30.27    4.50
   3   1  -5   26.17    4.74
   3   1  -5   26.80    2.93
  -3   1   5   34.43    4.25
   3   1  -4   27.56    3.62
   3   1  -4   24.68    3.19
  -3   1   4   21.55    3.42
   3   1  -4   21.52    3.89
   3   1  -3 2863.37   22.61
  -3   1   3 2993.59   24.83
   3   1  -3 2910.66   23.09
   3   1  -3 2889.03   19.33
   3   1  -2  126.58    5.56
  -3   1   2  111.08    5.50
   3   1  -1 1982.10   19.23
  -3   1   1 1957.92   18.97
   3   1   0 2807.92   22.78
  -3   1   0 2726.33   21.31
  -3   1   0 2769.98   13.59
   3   1   1  543.41   10.39
  -3   1  -1  545.55    9.22
  -3   1  -1  564.19    8.21
  -3   1  -2 1275.63   12.77
   3   1   2 1306.11   15.82
  -3   1  -2 1307.60   14.63
   3   1   3 2761.03   22.90
  -3   1  -3 2779.59   16.15
  -3   1  -3 2794.99   24.14
   3   1   4  514.19   10.23
  -3   1  -4  526.02   12.18
  -3   1  -5 1305.21   21.76
   3   1   5 1354.59   16.65
  -3   1  -5 1377.38   21.14
  -3   1  -6  287.42   11.35
  -3   1  -6  289.02   12.09
  -3   1  -7 2515.22   33.22
   3   1   7 2673.79   24.38
  -3   1  -7 2641.67   35.67
  -3   1  -8  553.01   17.58
  -3   1  -8  488.93   17.50
   3   1   8  518.84   11.63
  -3   1  -9  393.64   16.82
  -3   1  -9  410.86   16.69
  -3   1 -10  447.37   19.35
  -3   1 -10  420.71   18.19
  -3   1 -11  377.45   19.20
  -3   1 -11  401.47   18.92
  -3   1 -12    5.84    9.68
  -3   1 -12   14.66   11.16
  -3   1 -13  876.24   30.74
  -3   1 -13  934.70   32.56
  -3   1 -14   94.99   14.73
  -3   1 -14  114.44   16.95
  -3   1 -15  115.03   16.56
  -3   1 -15  158.91   20.02
  -3   1 -16  363.75   25.88
  -3   1 -16  415.50   27.89
   3   2 -16  588.67   30.53
   3   2 -15   80.53   15.22
   3   2 -14  127.45   15.26
   3   2 -14  105.34   15.09
   3   2 -13  209.50   16.14
   3   2 -13  185.92   16.66
   3   2 -12   49.13   10.21
   3   2 -12   52.78   11.38
   3   2 -11  109.95   11.24
  -3   2  11  115.04    8.66
   3   2 -11  113.61   12.28
  -3   2  10 1163.93   21.49
   3   2 -10 1183.00   26.87
   3   2 -10 1163.54   27.81
  -3   2   9  145.69    8.36
   3   2  -9  171.05   11.09
   3   2  -9  152.66   11.47
  -3   2   8  457.89   12.63
   3   2  -8  437.65   15.24
   3   2  -7  773.76   17.82
  -3   2   7  758.11   15.15
   3   2  -7  740.20   18.01
  -3   2   6  511.75   12.10
   3   2  -6  547.97   14.02
   3   2  -6  520.27   13.86
   3   2  -6  507.28    5.85
   3   2  -5  400.57   10.99
  -3   2   5  361.48    9.88
   3   2  -5  363.82   10.64
   3   2  -5  368.07    6.84
  -3   2   4 1267.56   17.19
   3   2  -4 1322.06   17.23
   3   2  -4 1255.66   13.64
   3   2  -3  819.56   12.05
  -3   2   3  840.15   13.75
   3   2  -3  831.15   11.79
   3   2  -3  839.02   10.06
   3   2  -2 9999.00   34.02
   3   2  -2 9859.01   41.09
  -3   2   2 9819.10   44.58
   3   2  -1 1752.60   17.98
  -3   2   1 1799.72   18.81
  -3   2   0  655.86    7.64
  -3   2   0  701.93   11.31
   3   2   0  626.56   11.10
  -3   2  -1  170.62    5.24
   3   2   1  158.14    6.14
  -3   2  -1  149.24    5.13
   3   2   2  302.19    8.09
  -3   2  -2  283.30    5.99
  -3   2  -2  288.25    7.58
  -3   2  -3 1244.85   16.77
  -3   2  -3 1258.16   10.11
   3   2   3 1269.61   15.94
  -3   2  -3 1265.12    9.67
   3   2   4 1850.06   19.60
  -3   2  -4 1727.42   22.23
   3   2   5   44.63    4.07
  -3   2  -5   39.13    5.52
  -3   2  -6  980.47   19.78
   3   2   6  966.13   15.02
  -3   2  -6  989.28   21.11
  -3   2  -7  327.85   13.28
   3   2   7  374.76   10.05
  -3   2  -7  339.73   14.26
  -3   2  -8   48.21    7.86
  -3   2  -8   43.66    8.12
   3   2   8   45.51    4.75
   3   2   9  808.83   15.74
  -3   2  -9  810.13   22.92
  -3   2  -9  870.24   24.48
  -3   2 -10  358.92   17.42
  -3   2 -10  379.37   18.35
  -3   2 -11  195.06   15.47
  -3   2 -11  168.61   14.02
  -3   2 -12 1903.06   41.38
  -3   2 -12 1808.96   41.73
  -3   2 -13   41.68   13.37
  -3   2 -13   56.51   13.17
  -3   2 -14  369.81   23.41
  -3   2 -14  341.14   23.24
  -3   2 -15  329.42   23.01
  -3   2 -15  358.19   25.11
  -3   2 -16  141.59   19.62
  -3   2 -16  107.49   19.79
   3   3 -16  229.32   21.90
   3   3 -15   21.86   13.64
   3   3 -14 1179.74   35.30
   3   3 -14 1133.54   36.46
   3   3 -13   37.91   11.23
   3   3 -13   49.89   12.24
   3   3 -12 1196.98   31.56
   3   3 -12 1115.01   31.60
   3   3 -11   15.31    8.67
  -3   3  11   14.29    5.73
   3   3 -11   16.21    8.63
   3   3 -10   58.04    9.10
  -3   3  10   70.64    7.35
   3   3 -10   52.26    9.00
   3   3  -9  348.79   15.14
  -3   3   9  391.35   12.78
   3   3  -9  417.12   16.41
   3   3  -8  650.76   18.59
  -3   3   8  615.52   14.99
   3   3  -8  611.78   17.80
   3   3  -7  273.51   11.93
  -3   3   7  286.36   10.08
   3   3  -7  254.10   11.18
   3   3  -6 2506.82   30.43
  -3   3   6 2480.37   26.58
   3   3  -6 2523.86   29.03
   3   3  -5  570.15    7.51
  -3   3   5  561.95   12.56
   3   3  -5  567.82   12.87
   3   3  -4  838.71   10.74
  -3   3   4  828.41   14.49
   3   3  -4  874.25   13.86
  -3   3   3  283.80    8.54
   3   3  -3  305.00    7.33
   3   3  -3  287.31    7.01
   3   3  -3  319.26    6.15
   3   3  -2  414.96    8.61
  -3   3   2  413.84    9.75
   3   3  -2  430.37    6.90
   3   3  -1   97.41    2.67
  -3   3   1   97.13    5.06
   3   3  -1   88.80    4.80
  -3   3   0 5782.40   26.30
  -3   3   0 5873.04   31.85
   3   3   0 5918.67   33.33
  -3   3  -1  308.76    7.43
  -3   3  -1  304.57    7.02
   3   3   1  300.87    8.12
   3   3   2 5679.68   33.94
  -3   3  -2 5885.02   25.11
  -3   3  -2 5784.14   33.73
  -3   3  -3  464.49    4.95
   3   3   3  455.79   10.12
  -3   3  -3  456.02   11.09
   3   3   4 1122.73   15.95
  -3   3  -4 1167.74   18.99
  -3   3  -5  154.52    8.77
   3   3   5  162.22    6.78
  -3   3  -6  290.42   12.10
   3   3   6  329.13    9.62
  -3   3  -7  118.92    9.49
  -3   3  -7  140.63   10.73
  -3   3  -8 1940.88   33.26
   3   3   8 1945.66   24.08
  -3   3  -8 1932.20   34.05
  -3   3  -9  104.89   10.70
  -3   3  -9  113.60   11.42
  -3   3 -10 1066.67   28.42
  -3   3 -10 1042.56   28.72
  -3   3 -11   66.37   11.93
  -3   3 -11   43.37   10.11
  -3   3 -12   23.24   10.53
  -3   3 -12   15.83   10.44
  -3   3 -13    2.80   11.12
  -3   3 -13   17.71   12.20
  -3   3 -14  394.54   24.14
  -3   3 -14  348.19   23.30
  -3   3 -15   30.62   13.79
  -3   3 -16  827.91   37.23
   3   4 -16  351.44   25.28
   3   4 -15  248.52   21.29
   3   4 -14   30.49   12.18
   3   4 -14   59.25   14.50
   3   4 -13  267.49   18.60
   3   4 -13  235.79   17.63
   3   4 -12  310.71   18.63
   3   4 -12  294.30   17.76
   3   4 -11  284.97   16.65
  -3   4  11  250.91   12.14
   3   4 -11  262.85   16.23
   3   4 -10 1147.25   28.51
  -3   4  10 1152.73   22.86
   3   4 -10 1171.56   28.07
   3   4  -9  153.46   11.74
  -3   4   9  162.44    9.18
   3   4  -9  164.46   11.14
   3   4  -8  511.65   17.59
  -3   4   8  488.24   13.98
   3   4  -8  481.64   16.04
   3   4  -7  319.94   12.29
   3   4  -7  325.04   13.29
  -3   4   7  327.92   11.19
  -3   4   6    0.20    3.89
   3   4  -6    1.64    4.67
  -3   4   5 1368.86   19.73
   3   4  -5 1401.74   10.11
   3   4  -5 1428.94   19.81
   3   4  -4 3570.33   21.00
  -3   4   4 3594.90   30.40
   3   4  -4 3586.67   27.37
  -3   4   3   91.14    5.48
   3   4  -3   96.31    4.57
   3   4  -3   93.00    3.58
   3   4  -3  101.17    4.57
   3   4  -2 3258.63   17.41
  -3   4   2 3167.97   26.70
   3   4  -2 3151.34   23.34
  -3   4   1  571.92   11.17
   3   4  -1  596.74   10.84
  -3   4   0 3759.02   26.02
   3   4   0 3604.86   26.88
  -3   4  -1 1580.94   17.75
  -3   4  -1 1585.09   15.36
   3   4   1 1559.23   18.11
  -3   4  -2  295.35    5.85
  -3   4  -2  273.39    8.66
   3   4   2  316.89    8.79
  -3   4  -3 1576.68   21.24
   3   4   3 1597.98   19.27
  -3   4  -4  930.41   17.88
   3   4   4  892.16   14.97
  -3   4  -5  138.70    8.64
   3   4   5  134.04    6.73
  -3   4  -6 2454.11   32.76
   3   4   6 2556.25   26.60
  -3   4  -7  200.18   11.52
   3   4   7  205.25    8.56
  -3   4  -8   62.34    8.97
   3   4   8   68.79    6.19
   3   4   9  161.66    8.32
  -3   4  -9  165.88   12.44
  -3   4 -10  469.41   20.13
   3   4  10  451.49   13.81
  -3   4 -10  458.60   20.82
  -3   4 -11  376.29   19.71
  -3   4 -11  366.59   20.20
  -3   4 -12  779.89   28.73
  -3   4 -12  769.44   29.30
  -3   4 -13  481.39   24.89
  -3   4 -14  702.93   30.86
  -3   4 -15   69.57   16.21
  -3   4 -16   15.83   15.40
   3   5 -16  215.65   22.37
   3   5 -15  500.63   27.11
   3   5 -14  131.36   16.23
   3   5 -14  146.59   16.58
   3   5 -13   36.24   12.33
   3   5 -13   54.79   12.67
   3   5 -12  544.63   23.63
  -3   5  12  523.03   17.77
   3   5 -11  839.86   27.01
  -3   5  11  779.77   20.60
   3   5 -11  776.57   25.20
   3   5 -10   58.74   10.04
  -3   5  10   31.12    6.89
   3   5 -10   48.04    9.92
   3   5  -9  655.59   21.65
  -3   5   9  637.12   17.18
   3   5  -9  586.78   19.24
   3   5  -8  206.54   11.40
   3   5  -8  237.75   13.23
  -3   5   8  216.56   10.01
   3   5  -7  820.60   18.82
  -3   5   7  885.96   18.28
  -3   5   6  198.15    8.92
   3   5  -6  232.96    9.79
  -3   5   5 2562.89   27.72
   3   5  -5 2437.09   25.83
  -3   5   4  617.58   13.40
   3   5  -4  630.55    8.64
   3   5  -4  644.90   12.13
  -3   5   3 1804.95   21.54
   3   5  -3 1696.85   16.19
   3   5  -3 1771.14   12.40
   3   5  -3 1761.08   16.62
   3   5  -2   86.59    4.59
  -3   5   2   94.20    5.58
   3   5  -2  103.92    3.74
  -3   5   1 2749.28   24.14
   3   5  -1 2757.24   23.23
  -3   5   0  267.95    7.71
   3   5   0  260.78    8.01
  -3   5  -1    9.74    2.79
   3   5   1    3.35    3.05
  -3   5  -2  186.27    8.43
  -3   5  -2  205.39    4.96
   3   5   2  221.22    7.73
  -3   5  -3 1231.81   20.38
   3   5   3 1237.47   17.70
   3   5   4  177.83    7.43
  -3   5  -4  167.37    9.15
   3   5   5 3115.81   29.50
  -3   5  -5 3076.22   36.02
  -3   5  -6  521.69   16.70
   3   5   6  523.07   13.04
  -3   5  -7  556.33   18.46
   3   5   7  565.37   14.01
  -3   5  -8  980.30   25.25
   3   5   8  972.78   18.71
  -3   5  -9   32.65    8.99
   3   5   9   31.22    5.45
  -3   5 -10  288.28   17.03
   3   5  10  268.39   11.46
  -3   5 -11 1121.94   32.43
  -3   5 -12  178.03   16.70
  -3   5 -13  694.97   29.68
  -3   5 -14  138.26   17.98
  -3   5 -15  229.43   22.04
  -3   5 -16   81.58   18.68
   3   6 -16   52.24   16.71
   3   6 -15  422.22   25.78
   3   6 -14   16.38   12.08
   3   6 -13 1516.19   39.52
  -3   6  12   24.49    7.52
   3   6 -12   48.29   11.59
   3   6 -11   33.81    9.45
  -3   6  11   26.86    7.32
  -3   6  10   25.57    6.25
   3   6 -10   10.82    7.95
  -3   6   9   18.44    6.19
   3   6  -9   16.94    7.10
  -3   6   8   36.92    6.31
   3   6  -8   27.59    7.06
  -3   6   7 3419.60   36.42
   3   6  -7 3502.28   38.16
  -3   6   6  125.18    7.79
   3   6  -6  101.49    7.63
  -3   6   5 2852.38   30.35
   3   6  -5 2730.77   27.77
  -3   6   4    9.74    4.03
   3   6  -4   11.97    3.86
   3   6  -4   13.78    2.34
   3   6  -3  266.59    7.29
  -3   6   3  278.44    9.19
   3   6  -3  261.14    6.73
   3   6  -3  272.72    4.58
  -3   6   2   11.62    3.42
   3   6  -2    7.37    2.79
   3   6  -1  433.85    9.76
  -3   6   1  433.35   10.24
   3   6   0   81.31    5.15
  -3   6   0   70.70    4.67
   3   6   1 3796.89   30.13
  -3   6  -1 3867.83   25.21
   3   6   2  268.24    8.84
  -3   6  -2  280.74   10.51
  -3   6  -2  264.01    5.62
   3   6   3 2377.69   25.36
  -3   6  -3 2476.28   30.38
   3   6   4  199.37    8.29
  -3   6  -4  174.23   10.13
  -3   6  -5  102.27    8.97
   3   6   5  117.72    6.99
  -3   6  -6   25.36    7.22
   3   6   6   23.23    4.86
  -3   6  -7 1223.23   27.41
   3   6   7 1236.33   21.00
  -3   6  -8    9.61    7.95
   3   6   8   11.11    4.93
  -3   6  -9 1360.11   32.51
   3   6   9 1343.63   23.73
  -3   6 -10  106.93   12.60
   3   6  10  115.78    8.83
  -3   6 -11  497.53   23.36
   3   6  11  509.34   16.70
  -3   6 -12   68.89   13.55
  -3   6 -13  189.74   19.50
  -3   6 -14   -4.24   13.77
  -3   6 -15  562.43   31.40
  -3   6 -16  116.19   19.98
   3   7 -16   14.82   16.16
   3   7 -15   69.79   15.76
   3   7 -14  351.24   22.69
  -3   7  13   89.82   10.46
   3   7 -13   71.92   13.87
  -3   7  12  243.45   13.87
   3   7 -12  257.94   17.87
  -3   7  11 1016.04   24.57
   3   7 -11 1023.02   29.36
  -3   7  10   42.77    7.43
   3   7 -10   48.58    9.40
  -3   7   9 1155.54   23.96
   3   7  -9 1162.10   26.78
  -3   7   8   88.23    8.17
   3   7  -8   85.08    9.15
  -3   7   7  555.08   15.87
   3   7  -7  595.16   16.75
  -3   7   6  920.19   19.01
   3   7  -6  924.37   18.96
  -3   7   5  172.94    8.59
   3   7  -5  174.39    8.51
   3   7  -4  202.62    5.06
  -3   7   4  201.26    8.75
   3   7  -4  208.42    7.95
  -3   7   3 1673.18   22.09
   3   7  -3 1611.90   16.16
   3   7  -2  357.02    8.69
  -3   7   2  338.18   10.02
   3   7  -1 1148.58   15.82
  -3   7   1 1125.98   16.58
   3   7   0  250.65    8.22
  -3   7   0  247.22    7.64
   3   7   1   93.17    5.86
  -3   7  -1   90.39    4.55
   3   7   2 2696.04   27.29
  -3   7  -2 2728.15   17.60
  -3   7  -3 1062.25   21.56
   3   7   3 1061.21   17.79
  -3   7  -4  222.06   11.74
   3   7   4  216.62    8.85
  -3   7  -5 6427.33   57.49
   3   7   5 6329.46   45.53
  -3   7  -6  108.10   10.46
   3   7   6  121.23    7.57
  -3   7  -7  340.38   16.73
   3   7   7  364.84   12.57
  -3   7  -8  689.03   23.36
   3   7   8  709.38   17.71
  -3   7  -9  391.04   19.29
   3   7   9  426.14   14.56
  -3   7 -10   79.67   12.19
   3   7  10   93.83    8.65
   3   7  11  955.45   22.99
  -3   7 -11  945.49   31.80
  -3   7 -12  107.56   15.82
  -3   7 -13  508.03   27.37
  -3   7 -14  197.31   20.87
  -3   7 -15   86.32   16.52
   3   8 -16  347.59   25.99
   3   8 -15   33.24   14.67
   3   8 -14   48.20   14.49
  -3   8  13  258.42   15.53
   3   8 -13  242.59   19.35
  -3   8  12  418.15   17.83
   3   8 -12  418.81   21.63
  -3   8  11   13.96    6.87
   3   8 -11   10.90    9.52
  -3   8  10 1123.29   25.59
   3   8 -10 1124.13   28.83
  -3   8   9   85.13    8.59
   3   8  -9   98.58   10.32
  -3   8   8  718.21   19.07
   3   8  -8  731.34   20.62
  -3   8   7  693.74   18.05
   3   8  -7  734.29   19.05
  -3   8   6   66.24    6.80
   3   8  -6   55.99    6.60
  -3   8   5 1567.21   24.37
  -3   8   4 3774.62   35.78
   3   8  -4 3696.47   19.96
   3   8  -3  139.23    5.45
  -3   8   3  131.12    7.43
   3   8  -2 1618.37   18.29
  -3   8   2 1586.65   21.34
   3   8  -1  321.67    9.00
  -3   8   1  311.74    9.41
  -3   8   0 1792.94   20.19
   3   8   0 1772.60   21.39
   3   8   1  988.25   16.86
  -3   8  -1 1040.22   13.86
   3   8   2  264.20    9.42
  -3   8  -2  246.12    5.68
   3   8   3   96.27    6.64
  -3   8  -4 1923.55   31.88
   3   8   4 1823.15   24.96
  -3   8  -5   32.36    7.97
   3   8   5   41.30    5.52
  -3   8  -6 1123.41   27.31
   3   8   6 1099.21   20.97
  -3   8  -7  402.79   18.25
   3   8   7  396.86   13.47
  -3   8  -8  392.92   19.04
   3   8   8  375.85   13.84
  -3   8  -9  433.45   21.03
   3   8   9  424.19   15.16
   3   8  10  441.62   16.07
  -3   8 -10  473.78   22.73
  -3   8 -11  138.78   16.32
   3   8  11  104.23    9.91
  -3   8 -12  635.08   29.07
   3   8  12  638.59   20.77
  -3   8 -13  112.15   17.33
  -3   8 -14  606.31   32.00
  -3   8 -15   78.91   19.49
   3   9 -14  926.92   34.37
  -3   9  14  839.45   26.58
  -3   9  13    3.70    8.43
   3   9 -13    6.41   11.39
  -3   9  12  784.09   24.01
   3   9 -12  792.74   28.47
  -3   9  11   79.27    9.79
   3   9 -11   70.10   11.61
  -3   9  10   82.15    9.65
   3   9 -10   67.14   11.29
  -3   9   9   19.76    6.82
   3   9  -9    8.50    7.73
  -3   9   8 1159.12   24.73
   3   9  -8 1191.58   26.24
  -3   9   7  303.46   13.07
   3   9  -7  313.85   13.57
  -3   9   6 1539.73   26.13
  -3   9   5   61.55    6.53
   3   9  -4 1757.74   13.55
   3   9  -4 1728.98   13.29
  -3   9   4 1762.90   25.58
   3   9  -3  685.30   11.27
  -3   9   3  726.56   15.82
   3   9  -2  319.39    8.80
  -3   9   2  312.06   10.28
  -3   9   1  336.39   10.01
   3   9  -1  364.16    9.97
  -3   9   0 1192.70   16.82
   3   9   0 1205.17   18.38
  -3   9  -1  287.17    7.98
   3   9   1  300.69   10.07
  -3   9  -2 3110.84   19.68
   3   9   2 3136.31   31.72
   3   9   3  592.47   14.71
   3   9   4  388.40   12.52
  -3   9  -5   38.83    8.73
   3   9   5   21.42    5.38
  -3   9  -6  809.19   24.77
   3   9   6  783.04   18.43
  -3   9  -7  131.43   12.70
   3   9   7  118.95    8.64
  -3   9  -8 1634.28   37.35
   3   9   8 1627.74   28.18
  -3   9  -9   52.86   12.22
   3   9   9   75.57    8.84
  -3   9 -10 1857.76   43.80
   3   9  10 1838.21   32.42
   3   9  11   65.24    8.99
  -3   9 -11   60.77   13.79
  -3   9 -12   79.74   15.71
   3   9  12  100.72   10.51
  -3   9 -13   39.73   14.93
  -3   9 -14  273.82   24.79
  -3   9 -15   15.54   17.34
  -3  10  14   54.20   11.17
  -3  10  13  583.16   22.40
  -3  10  12  598.99   22.02
  -3  10  11  112.74   11.34
  -3  10  10  449.89   17.95
  -3  10   9   37.42    7.84
  -3  10   8 1176.50   25.68
  -3  10   7  436.91   15.72
  -3  10   6   91.61    8.26
  -3  10   5  145.46    9.06
   3  10  -4  942.38    9.71
  -3  10   4  930.28   19.39
  -3  10   3  100.51    7.17
   3  10  -3  103.31    5.16
  -3  10   2 1960.90   25.25
   3  10  -2 1955.93   21.17
   3  10  -2 1880.88   16.57
   3  10  -1  678.18   13.84
  -3  10   1  660.35   14.15
   3  10   0 1223.03   19.13
  -3  10   0 1214.84   17.46
  -3  10  -1 1030.27   14.76
   3  10   1  989.81   18.11
  -3  10  -2   86.55    4.05
   3  10   2   82.33    6.67
   3  10   3  427.67   13.25
   3  10   4 1553.74   24.98
   3  10   5   28.03    5.68
  -3  10  -6  563.45   21.54
   3  10   6  542.24   16.22
  -3  10  -7  299.93   18.00
   3  10   7  314.23   13.29
  -3  10  -8  357.45   20.23
   3  10   8  355.97   14.59
  -3  10  -9  923.56   31.60
   3  10   9  909.27   23.06
  -3  10 -10  683.34   28.64
   3  10  10  648.87   20.64
  -3  10 -11  186.74   19.24
   3  10  11  183.89   12.88
  -3  10 -12  568.34   29.74
   3  10  12  549.71   20.67
  -3  10 -13   21.65   15.02
  -3  10 -14  407.65   28.66
  -3  10 -15  260.13   26.80
  -3  11  14  292.73   18.02
  -3  11  13   58.16   10.58
  -3  11  12   59.54   10.96
  -3  11  11  929.85   26.62
  -3  11  10   44.96    8.90
  -3  11   9 1984.41   35.13
  -3  11   8  151.52   11.41
  -3  11   7   36.97    7.15
  -3  11   6  485.46   16.23
  -3  11   5   14.96    5.72
   3  11  -4  266.94    5.28
  -3  11   4  276.37   11.53
  -3  11   3 2652.73   31.59
   3  11  -3 2548.81   22.09
   3  11  -3 2590.33   21.89
  -3  11   2   76.94    6.61
   3  11  -2   80.76    5.46
   3  11  -2   80.28    4.14
  -3  11   1 1194.85   19.27
   3  11  -1 1175.41   18.32
   3  11   0  242.32    9.59
  -3  11   0  216.46    8.17
   3  11   1   80.50    6.74
  -3  11  -1   76.11    5.14
   3  11   2  519.52   14.46
  -3  11  -2  509.53    8.74
   3  11   3 1008.93   20.42
   3  11   4   44.66    6.37
   3  11   5 1491.61   26.29
   3  11   6  351.94   13.92
   3  11   7 1124.02   24.58
  -3  11  -8  351.74   20.28
   3  11   8  338.43   14.95
  -3  11  -9   56.88   12.90
   3  11   9   66.23    9.13
  -3  11 -10  627.96   28.93
   3  11  10  573.95   20.19
  -3  11 -11  423.10   25.73
   3  11  11  407.34   18.17
  -3  11 -12   63.05   16.55
   3  11  12   82.19   10.79
  -3  11 -13  882.58   38.75
   3  11  13  827.48   26.74
  -3  11 -14   28.99   17.64
  -3  12  15  305.32   19.33
  -3  12  14   19.61    9.70
  -3  12  13  562.92   23.15
  -3  12  12   31.33    9.53
  -3  12  11  280.60   16.45
  -3  12  10    0.69    7.82
  -3  12   9  334.77   15.99
  -3  12   8   88.54    9.97
  -3  12   7 1352.36   27.87
  -3  12   6  124.95    9.80
  -3  12   5 2080.80   31.63
   3  12  -4  135.85    3.78
  -3  12   4  165.55    9.85
  -3  12   3   86.73    7.41
   3  12  -3   85.71    4.88
   3  12  -2    6.17    3.47
   3  12  -2    3.98    3.49
  -3  12   2    2.93    4.35
   3  12  -2    4.88    2.41
  -3  12   1  389.16   11.79
   3  12  -1  441.50   10.42
   3  12  -1  389.95   11.32
  -3  12   0   48.47    5.00
   3  12   0   50.61    5.84
   3  12   1 2989.59   33.03
  -3  12  -1 3151.61   26.68
   3  12   2  396.77   13.22
  -3  12  -2  403.80    7.91
   3  12   3  711.78   18.14
   3  12   4   36.83    6.47
   3  12   5   12.29    6.26
   3  12   6  231.39   12.40
   3  12   7  817.24   21.90
   3  12   8  127.67   10.70
   3  12   9 2378.10   38.91
   3  12  10   12.87    8.09
   3  12  11  276.04   15.94
   3  12  12   11.63    9.36
   3  12  13   21.13    9.48
   3  12  13   14.18    9.37
  -3  13  14   86.64   13.90
  -3  13  13   45.10   10.83
  -3  13  12  217.02   15.90
  -3  13  11  764.89   25.62
  -3  13  10   23.78    8.85
  -3  13   9 1311.43   30.66
  -3  13   8  703.20   22.00
  -3  13   7  268.99   14.27
  -3  13   6  400.69   15.85
  -3  13   5   17.52    6.55
  -3  13   4  734.08   18.94
   3  13  -3  973.57   14.03
  -3  13   3  990.49   20.74
   3  13  -2   55.62    5.49
   3  13  -2   53.88    5.27
  -3  13   2   56.38    6.37
   3  13  -2   44.42    2.49
   3  13  -1  355.91    9.44
   3  13  -1  355.50   11.08
  -3  13   1  325.10   11.28
   3  13   0 1063.56   19.70
  -3  13   0 1081.65   17.88
  -3  13  -1   28.50    4.30
   3  13   1   29.95    5.71
  -3  13  -2   26.62    3.10
   3  13   2   27.85    5.76
   3  13   3 1372.78   25.33
   3  13   4  577.47   17.38
   3  13   5  932.09   22.45
   3  13   6  730.21   20.83
   3  13   7  969.79   24.42
   3  13   8  218.39   13.33
   3  13   9   85.10   10.46
   3  13  10  478.96   19.82
   3  13  11  296.65   17.10
   3  13  12   -1.45    8.71
   3  13  13  480.88   22.20
   3  13  13  507.40   22.23
   3  13  14   66.35   12.13
   3  13  14   99.85   13.58
  -3  14  14   38.23   12.25
  -3  14  13   47.67   11.36
  -3  14  12  423.07   20.63
  -3  14  11   59.44   11.25
  -3  14  10 1005.27   28.80
  -3  14   9  134.97   12.22
  -3  14   8  919.90   25.56
  -3  14   7  411.61   17.05
  -3  14   6   22.47    7.39
  -3  14   5  261.48   13.39
  -3  14   4  195.49   10.95
   3  14  -3  278.34    8.02
  -3  14   3  289.01   12.32
   3  14  -2 1712.75   21.48
  -3  14   2 1698.06   26.27
   3  14  -1  511.95   13.46
   3  14  -1  506.12   13.14
   3  14  -1  459.12   10.10
  -3  14   1  459.06   13.46
   3  14   0  152.85    8.66
  -3  14   0  146.04    7.68
   3  14   0  135.59    7.54
   3  14   1  101.38    8.11
  -3  14  -1  109.97    6.23
   3  14   2  287.88   12.24
  -3  14  -2  322.80    7.19
   3  14   3  571.53   17.32
   3  14   4 1491.82   28.10
   3  14   5  145.49   10.74
   3  14   6 1867.16   33.44
   3  14   7  211.87   13.10
   3  14   8  139.97   11.83
   3  14   9  197.00   14.12
   3  14  10  143.50   12.83
   3  14  11  106.99   12.30
   3  14  12  622.26   24.05
   3  14  12  677.67   25.54
   3  14  13   37.96   10.96
   3  14  13   25.57   10.52
   3  14  14  255.16   18.06
   3  14  14  311.26   19.74
  -3  15  13   25.51   12.49
  -3  15  12  502.38   23.12
  -3  15  11   20.21    9.87
  -3  15  10   33.82    9.97
  -3  15   9    2.38    8.30
  -3  15   8  616.47   21.94
  -3  15   7   49.32    9.02
  -3  15   6 2197.16   36.65
  -3  15   5   73.09    8.97
  -3  15   4  568.09   17.64
   3  15  -3   99.26    5.39
  -3  15   3   83.05    8.26
   3  15  -2   63.29    5.77
  -3  15   2   53.05    6.85
   3  15  -1   17.29    4.80
  -3  15   1   15.94    5.20
   3  15  -1   20.55    3.57
   3  15   0 1679.89   25.81
  -3  15   0 1756.74   23.59
   3  15   0 1777.71   22.86
   3  15   0 1724.83   25.73
   3  15   1   98.14    7.98
  -3  15  -1   93.82    6.06
   3  15   1   88.66    7.90
   3  15   1  103.55    7.83
   3  15   2  856.90   20.56
   3  15   3   24.86    6.76
   3  15   4  377.87   15.50
   3  15   5   58.28    8.63
   3  15   6  293.75   15.12
   3  15   7   24.06    7.93
   3  15   8 1501.16   32.89
   3  15   9    8.18    8.40
   3  15  10  733.34   24.75
   3  15  10  734.29   25.52
   3  15  11   10.01    9.10
   3  15  11    2.95    9.28
   3  15  12   84.69   13.18
   3  15  12  111.17   13.73
   3  15  13   32.63   11.99
   3  15  13   40.97   11.95
  -3  16  12   44.00   11.89
  -3  16  11   95.20   12.76
  -3  16  10 1004.93   30.02
  -3  16   9   41.92    9.94
  -3  16   8  164.99   13.16
  -3  16   7  314.20   16.40
  -3  16   6   21.26    8.03
  -3  16   5  656.76   20.48
  -3  16   4  682.82   19.87
  -3  16   3   31.21    6.81
   3  16  -2 1213.56   18.95
  -3  16   2 1182.17   23.14
   3  16  -1   35.85    5.79
  -3  16   1   44.61    6.41
   3  16  -1   33.81    3.71
  -3  16   0  211.55    9.46
   3  16   0  214.26   10.34
   3  16   0  181.56    9.87
   3  16   0  224.45    8.85
   3  16   1  726.67   18.72
  -3  16  -1  768.17   14.40
   3  16   1  754.56   18.76
   3  16   1  749.68   17.09
   3  16   2  156.82   10.34
   3  16   2  172.48   10.85
   3  16   3   94.09    8.99
   3  16   3  109.49    9.67
   3  16   4  523.38   17.94
   3  16   4  503.22   18.06
   3  16   5   38.84    8.47
   3  16   6 1291.68   29.94
   3  16   7  460.76   18.75
   3  16   7  449.12   19.23
   3  16   8   67.40   10.73
   3  16   8   63.20   10.64
   3  16   9  400.50   19.19
   3  16   9  404.51   19.83
   3  16  10   54.47   10.46
   3  16  10   38.47   10.79
   3  16  11  213.35   16.86
   3  16  11  201.86   16.18
   3  16  12  527.63   24.10
   3  16  12  607.17   25.34
  -3  17  12  245.14   18.63
  -3  17  11  406.81   21.20
  -3  17  10   16.86    9.87
  -3  17   9  572.06   23.43
  -3  17   8   37.49   10.01
  -3  17   7  228.79   14.99
  -3  17   6  275.13   15.02
  -3  17   5  388.65   16.90
  -3  17   4   42.55    8.23
  -3  17   3  716.19   19.91
   3  17  -2   32.67    5.29
  -3  17   2   32.90    6.64
   3  17  -1 1128.61   20.72
  -3  17   1 1080.36   21.35
  -3  17   0  374.07   12.09
   3  17   0  315.88    9.70
   3  17   0  324.96   12.57
   3  17   1   26.84    6.15
   3  17   1   39.04    6.86
   3  17   2  210.07   11.75
   3  17   2  213.40   12.15
   3  17   3  372.52   15.65
   3  17   3  345.66   15.10
   3  17   4   95.26   10.05
   3  17   4   62.94    9.23
   3  17   5 1239.06   28.65
   3  17   5 1296.89   29.82
   3  17   6   16.06    8.18
   3  17   6   12.26    7.72
   3  17   7  343.57   18.23
   3  17   7  308.27   16.63
   3  17   8  326.63   17.98
   3  17   8  373.11   18.66
   3  17   9   31.83   10.53
   3  17   9   31.73   10.20
   3  17  10   93.75   13.24
   3  17  10   81.41   12.63
   3  17  11  493.03   23.11
   3  17  11  547.60   24.42
   3  17  12   20.30   11.26
  -3  18  11  230.46   18.00
  -3  18  10   21.03    9.87
  -3  18   9  160.09   14.69
  -3  18   8  163.99   13.83
  -3  18   7 1062.74   29.12
  -3  18   6  107.70   11.61
  -3  18   5  713.20   22.34
  -3  18   4   10.45    7.89
  -3  18   3  360.30   15.11
  -3  18   2   66.25    7.87
   3  18  -1  821.19   18.17
  -3  18   1  843.89   19.32
   3  18   0   75.24    8.15
  -3  18   0   70.66    6.60
   3  18   0   74.55    5.65
   3  18   1  620.26   15.09
   3  18   1  570.59   17.46
   3  18   2   60.76    8.49
   3  18   3 1261.36   27.41
   3  18   3 1210.99   27.02
   3  18   4  259.08   14.35
   3  18   4  293.12   15.15
   3  18   5   14.04    8.15
   3  18   5    3.18    7.68
   3  18   6   19.28    8.32
   3  18   6   14.74    8.76
   3  18   7  770.36   24.86
   3  18   7  800.86   25.79
   3  18   8   98.95   12.07
   3  18   8  103.99   12.79
   3  18   9  496.37   22.27
   3  18   9  523.95   22.69
   3  18  10   40.46   10.77
   3  18  10   58.48   11.67
   3  18  11  496.17   23.67
  -3  19  10   14.41   11.38
  -3  19   9  319.03   18.76
  -3  19   8  205.19   15.96
  -3  19   7  143.66   13.43
  -3  19   6  701.25   23.60
  -3  19   5  317.99   16.16
  -3  19   4  276.49   14.62
  -3  19   3  598.96   19.17
  -3  19   2   47.18    7.71
   3  19  -1  763.38   17.27
  -3  19   1  746.30   18.43
   3  19   0   42.93    7.36
   3  19   1   16.10    6.24
   3  19   1   27.09    5.26
   3  19   2  971.33   23.88
   3  19   3  251.04   13.94
   3  19   4   23.80    8.53
   3  19   5  721.84   23.58
   3  19   5  836.61   24.84
   3  19   6   54.26   10.29
   3  19   6   50.46   10.37
   3  19   7  240.33   16.37
   3  19   7  278.43   16.89
   3  19   8  541.60   22.71
   3  19   9   11.71    9.97
   3  19  10  153.20   15.61
  -3  20   9   77.20   12.94
  -3  20   8  279.71   17.80
  -3  20   7   38.58   10.39
  -3  20   6   96.48   12.25
  -3  20   5  127.18   12.19
  -3  20   4  475.72   18.73
  -3  20   3   -1.83    6.93
  -3  20   2  577.12   18.13
  -3  20   1   19.32    6.28
   3  20   0  124.91    9.52
   3  20   1  358.33   15.15
   3  20   1  347.71   12.62
   3  20   2   57.45    9.08
   3  20   3   88.12   10.50
   3  20   4 1221.74   29.45
   3  20   5  112.95   12.06
   3  20   6  625.80   23.55
   3  20   7   84.72   11.98
   3  20   8  149.97   14.75
   3  20   9   36.85   11.24
  -3  21   8  376.30   20.74
  -3  21   7   46.55   11.31
  -3  21   6  956.18   28.24
  -3  21   5   50.23    9.85
  -3  21   4  391.13   17.55
  -3  21   3    4.91    7.72
  -3  21   2   46.31    8.22
   3  21   0  441.54   15.43
   3  21   1   71.34    9.24
   3  21   2 1330.27   29.05
   3  21   3   36.97    9.11
   3  21   4   37.20    9.56
   3  21   5    5.72    8.93
   3  21   6   78.79   12.06
   3  21   7   -1.22   10.18
   3  21   8  656.69   26.46
  -3  22   7  210.31   16.03
  -3  22   6   62.42   11.44
  -3  22   5  111.93   12.19
  -3  22   4  309.47   16.53
  -3  22   3   79.10    9.96
   3  22   1  167.36   11.93
   3  22   2    1.76    7.75
   3  22   3  300.98   16.32
   3  22   4  621.89   22.80
   3  22   5   23.19   10.12
   3  22   6  258.67   17.47
   3  22   7  180.35   15.97
  -3  23   6   13.84   10.64
  -3  23   5  226.59   15.65
  -3  23   4  102.01   11.47
  -3  23   3  716.72   21.64
   3  23   2  108.57   11.43
   3  23   3  362.91   17.57
   3  23   4   97.19   12.54
   3  23   5  288.57   17.70
   3  23   6   92.47   13.84
  -3  24   5  579.42   22.41
  -3  24   4    9.73    8.54
   3  24   3  355.28   17.86
   3  24   4  -10.75   10.05
  -4 -24   3    1.76   11.14
  -4 -24   2  316.21   20.35
   4 -24  -2  356.69   22.29
  -4 -24   1   12.09   11.11
   4 -24  -1   12.09   10.74
  -4 -24   0   17.50   12.10
   4 -24   0    9.69   11.12
  -4 -24  -1   59.69   13.46
   4 -24   1   84.18   13.92
   4 -23  -4  165.21   16.96
  -4 -23   3   21.79   10.09
   4 -23  -3   14.30   12.13
   4 -23  -2  202.85   17.33
  -4 -23   2  192.17   16.41
  -4 -23   1   53.28   12.54
   4 -23  -1   34.09   12.13
  -4 -23   0  510.59   24.18
   4 -23   0  487.74   23.81
  -4 -23  -1   66.20   13.16
   4 -23   1   91.88   14.10
  -4 -23  -2  441.46   23.23
  -4 -23  -3  184.35   17.17
  -4 -23  -4   24.63   12.28
   4 -22  -6   43.76   13.24
   4 -22  -5  241.06   18.52
   4 -22  -4  236.83   17.84
  -4 -22   3    5.88   10.29
   4 -22  -3   -3.27   10.82
  -4 -22   2  102.78   13.47
   4 -22  -2  124.13   14.80
  -4 -22   1  532.31   23.62
   4 -22  -1  547.03   24.48
  -4 -22   0    5.32   10.25
   4 -22   0   22.66   10.58
  -4 -22  -1  416.80   21.95
   4 -22   1  428.87   21.45
  -4 -22  -2  142.97   15.42
  -4 -22  -3  143.41   14.84
  -4 -22  -4  312.65   20.23
  -4 -22  -5   88.85   14.43
  -4 -22  -6  164.38   17.04
   4 -21  -8   65.30   18.43
   4 -21  -7   15.54   11.61
   4 -21  -6    1.56   10.59
   4 -21  -5  310.78   19.53
   4 -21  -4   95.78   13.35
   4 -21  -3 1282.24   35.07
  -4 -21   3 1213.01   31.95
  -4 -21   2   49.23   10.84
   4 -21  -2   64.89   11.99
  -4 -21   1  215.23   16.09
   4 -21  -1  177.56   15.59
  -4 -21   0   36.57   11.04
   4 -21   0   36.26   10.84
  -4 -21  -1   17.99   10.22
   4 -21   1    4.74    9.41
  -4 -21  -2    4.17    9.89
   4 -21   2   10.34    9.36
  -4 -21  -3  611.81   25.30
  -4 -21  -4  137.39   14.95
  -4 -21  -5  700.52   27.45
  -4 -21  -6  105.60   14.30
  -4 -21  -7  147.99   15.93
  -4 -21  -8   28.27   12.09
   4 -20  -9  261.70   23.97
   4 -20  -9  291.96   19.86
   4 -20  -8   44.59   13.39
   4 -20  -8   21.56   15.33
   4 -20  -7  265.89   19.14
   4 -20  -6   83.69   13.38
   4 -20  -5  562.86   24.33
  -4 -20   4  119.51   11.77
   4 -20  -4  131.17   13.75
  -4 -20   3  285.08   16.79
   4 -20  -3  281.17   17.61
  -4 -20   2   60.27   10.12
   4 -20  -2   75.57   12.20
  -4 -20   1  239.26   15.91
   4 -20  -1  252.57   16.51
  -4 -20   0   22.03    9.13
   4 -20   0   -6.84    9.98
  -4 -20  -1 1386.80   34.39
   4 -20   1 1449.13   34.21
  -4 -20  -2  197.42   15.45
   4 -20   2  141.27   13.21
  -4 -20  -3  153.21   14.34
  -4 -20  -4  199.54   15.61
  -4 -20  -5    2.11   10.03
  -4 -20  -6  132.77   14.67
  -4 -20  -7  673.59   26.35
  -4 -20  -8  123.46   14.40
  -4 -20  -9  431.80   21.70
   4 -19 -10   25.75   11.56
   4 -19 -10    6.38   16.37
   4 -19  -9   38.13   16.08
   4 -19  -9   85.59   13.77
   4 -19  -8  423.33   22.07
   4 -19  -8  353.82   23.89
   4 -19  -7   40.36   12.19
   4 -19  -6  516.97   23.42
   4 -19  -5  197.68   15.55
  -4 -19   4  165.19   13.03
   4 -19  -4  169.73   14.64
   4 -19  -3 1226.74   32.43
  -4 -19   3 1294.57   30.93
   4 -19  -2   80.68   11.25
  -4 -19   2   79.70   10.75
   4 -19  -1  100.34   12.16
  -4 -19   1  102.26   11.35
  -4 -19   0  921.42   27.12
   4 -19   0  919.27   27.18
  -4 -19  -1  157.94   13.86
   4 -19   1  180.50   13.68
  -4 -19  -2  218.17   14.98
   4 -19   2  248.78   15.01
  -4 -19  -3  133.38   13.16
  -4 -19  -4   48.23   10.09
  -4 -19  -5  100.75   12.69
  -4 -19  -6  621.65   24.26
  -4 -19  -7   10.30    9.54
  -4 -19  -8  444.98   21.68
  -4 -19  -9  264.79   17.82
  -4 -19 -10  222.53   16.38
   4 -18 -11   10.21   10.59
   4 -18 -10  215.81   22.10
   4 -18 -10  198.81   16.75
   4 -18  -9   26.26   10.98
   4 -18  -9    2.86   14.16
   4 -18  -8  474.54   26.32
   4 -18  -8  530.36   23.10
   4 -18  -7   39.19   10.85
   4 -18  -6  423.38   20.59
   4 -18  -5  100.60   12.30
  -4 -18   4  826.30   23.86
   4 -18  -4  804.59   25.99
  -4 -18   3  135.14   11.74
   4 -18  -3  125.38   12.30
   4 -18  -2 1174.64   30.01
  -4 -18   2 1159.32   28.50
  -4 -18   1   16.62    8.05
   4 -18  -1   19.73    8.41
  -4 -18   0   66.64    9.80
   4 -18   0   57.70    9.81
   4 -18   1   37.28    9.01
  -4 -18  -1   38.47    9.63
  -4 -18  -2  398.30   18.71
   4 -18   2  447.24   18.45
  -4 -18  -3  102.46   11.38
  -4 -18  -4 1019.27   28.82
  -4 -18  -5   41.48    9.89
  -4 -18  -6  554.09   22.23
  -4 -18  -7   72.21   11.62
  -4 -18  -8    6.90    9.16
  -4 -18  -9    2.44    9.51
  -4 -18 -10  520.10   21.68
  -4 -18 -10  471.24   25.10
   4 -17 -11  122.43   13.92
   4 -17 -11  138.68   20.90
   4 -17 -10   90.63   12.58
   4 -17 -10   67.78   17.31
   4 -17  -9  354.76   24.46
   4 -17  -9  310.76   18.48
   4 -17  -8  882.89   32.70
   4 -17  -8  900.89   28.69
   4 -17  -7   57.84   11.14
   4 -17  -6  852.48   27.31
  -4 -17   5   43.26    7.81
   4 -17  -5   42.65   10.17
   4 -17  -4  126.18   12.55
  -4 -17   4  136.24   11.11
   4 -17  -3   84.12   10.65
  -4 -17   3   99.41   10.44
   4 -17  -2  222.38   14.28
  -4 -17   2  216.67   13.48
   4 -17  -1   55.35    9.73
  -4 -17   1   54.95    9.23
  -4 -17   0 1033.55   26.39
   4 -17   0 1116.87   27.58
   4 -17   1  151.41   11.77
  -4 -17  -1  153.76   12.22
  -4 -17  -2  434.79   18.63
   4 -17   2  449.51   17.62
  -4 -17  -3  327.77   16.73
   4 -17   3  335.21   15.38
  -4 -17  -4  187.97   13.81
  -4 -17  -5  348.83   17.46
  -4 -17  -6  620.02   22.68
  -4 -17  -7  135.40   12.76
  -4 -17  -8  456.25   20.13
  -4 -17  -9   43.63   10.46
  -4 -17  -9   63.38   13.19
  -4 -17 -10  360.36   18.18
  -4 -17 -10  366.22   22.04
  -4 -17 -11  146.03   17.11
   4 -16 -12  182.84   22.11
   4 -16 -11    7.74   14.44
   4 -16 -11    1.42    9.79
   4 -16 -10  297.37   17.30
   4 -16 -10  271.53   22.61
   4 -16  -9  123.79   17.77
   4 -16  -9   98.12   12.38
   4 -16  -8   57.54   14.28
   4 -16  -8   47.35   10.40
   4 -16  -7 1000.43   28.49
   4 -16  -6  128.20   12.79
   4 -16  -5  375.95   18.00
  -4 -16   5  356.11   15.19
   4 -16  -4  401.34   17.52
  -4 -16   4  392.54   15.95
   4 -16  -3   45.39    8.59
  -4 -16   3   77.26    8.90
  -4 -16   2  377.29   15.72
   4 -16  -2  398.44   17.30
   4 -16  -1  306.08   14.91
  -4 -16   1  337.79   15.27
   4 -16   0   67.67    8.91
  -4 -16   0   63.27    9.31
   4 -16   1 1712.74   31.57
  -4 -16  -1 1749.13   32.80
  -4 -16  -2  214.94   13.17
   4 -16   2  150.08   11.00
  -4 -16  -3  262.89   14.59
   4 -16   3  301.52   14.00
  -4 -16  -4  561.92   20.23
  -4 -16  -5   83.49   10.52
  -4 -16  -6  253.69   14.97
  -4 -16  -7  443.28   18.96
  -4 -16  -8  134.09   12.85
  -4 -16  -9  765.40   24.32
  -4 -16  -9  846.63   29.55
  -4 -16 -10  184.79   13.58
  -4 -16 -10  224.11   18.87
  -4 -16 -11   11.82   11.99
  -4 -16 -12  186.22   19.20
   4 -15 -12   20.79   15.88
   4 -15 -11  492.83   27.44
   4 -15 -11  484.12   20.57
   4 -15 -10   34.39   15.30
   4 -15 -10   24.87    9.12
   4 -15  -9  597.71   28.10
   4 -15  -9  618.00   22.76
   4 -15  -8    9.71    8.29
   4 -15  -8    5.72   11.84
   4 -15  -7   41.18   10.09
   4 -15  -6  169.84   13.57
   4 -15  -5  890.61   25.43
  -4 -15   5  904.15   22.02
  -4 -15   4   56.64    7.96
   4 -15  -4   55.52    8.86
   4 -15  -3 1673.52   32.35
  -4 -15   3 1785.46   30.96
   4 -15  -2  134.79   11.05
  -4 -15   2  116.05   10.05
   4 -15  -1 1306.36   27.64
  -4 -15   1 1207.65   26.10
  -4 -15   0   30.28    7.18
   4 -15   0   41.58    7.30
  -4 -15  -1   43.50    7.66
   4 -15   1   74.25    8.73
  -4 -15  -2   74.60    9.31
   4 -15   2   80.80    8.81
  -4 -15  -3  652.19   20.74
   4 -15   3  697.28   19.14
  -4 -15  -4   81.52    9.85
  -4 -15  -5  913.31   25.02
  -4 -15  -6  151.33   12.22
  -4 -15  -7   30.92    8.57
  -4 -15  -8   50.06    9.37
  -4 -15  -9  178.65   13.06
  -4 -15  -9  221.02   17.09
  -4 -15 -10   46.66   12.74
  -4 -15 -10   62.14    9.78
  -4 -15 -11 1253.63   36.88
  -4 -15 -12   27.70   14.07
   4 -14 -13  409.15   27.74
   4 -14 -12  184.09   20.47
   4 -14 -11   -3.51    8.24
   4 -14 -11    3.41   13.55
   4 -14 -10   83.60   14.96
   4 -14 -10  114.81   11.81
   4 -14  -9  163.84   13.31
   4 -14  -9  140.86   17.02
   4 -14  -8   94.30   14.17
   4 -14  -8   98.97   10.96
   4 -14  -7 2100.73   38.01
   4 -14  -6   70.18    9.85
   4 -14  -5   84.31    9.84
  -4 -14   5   96.23    8.73
   4 -14  -4  450.32   17.58
  -4 -14   4  443.52   15.57
   4 -14  -3  150.13   11.16
  -4 -14   3  131.32    9.81
  -4 -14   2  202.41   11.35
   4 -14  -2  215.73   12.47
   4 -14  -1 1796.23   31.21
  -4 -14   1 1773.34   30.20
   4 -14   0  416.13   15.33
  -4 -14   0  409.57   15.64
   4 -14   1 1213.17   24.78
  -4 -14  -1 1246.11   26.05
  -4 -14  -2  106.27    9.41
   4 -14   2  105.13    8.57
  -4 -14  -3  402.85   16.13
   4 -14   3  444.88   14.92
  -4 -14  -4   73.60    9.02
  -4 -14  -5   82.42    9.29
  -4 -14  -6   65.22    9.03
  -4 -14  -7  697.72   21.40
  -4 -14  -8  115.22   11.11
  -4 -14  -9  807.02   22.81
  -4 -14  -9  826.26   27.31
  -4 -14 -10  337.63   15.20
  -4 -14 -10  285.34   18.86
  -4 -14 -11   66.60   13.24
  -4 -14 -12  184.31   18.14
  -4 -14 -13  253.22   22.24
   4 -13 -13  176.04   20.82
   4 -13 -12  181.65   19.75
   4 -13 -11  160.18   12.63
   4 -13 -11  165.30   18.96
   4 -13 -10    6.55    7.99
   4 -13 -10   10.41   11.98
   4 -13  -9  214.10   17.89
   4 -13  -9  249.59   14.63
   4 -13  -8  801.05   23.87
   4 -13  -8  828.99   28.95
   4 -13  -7   31.52    8.24
   4 -13  -6  543.43   19.36
  -4 -13   6  494.90   15.73
   4 -13  -5  985.01   24.87
  -4 -13   5  949.01   20.97
   4 -13  -4  207.44   12.42
  -4 -13   4  201.50   10.66
   4 -13  -3  176.38   11.36
  -4 -13   3  207.37   10.70
   4 -13  -2  635.81   18.99
  -4 -13   2  732.79   18.97
   4 -13  -1 1276.47   25.52
  -4 -13   1 1280.72   25.07
   4 -13   0 1289.56   25.09
  -4 -13   0 1308.86   25.55
   4 -13   1  167.75   10.21
  -4 -13  -1  166.38   10.62
  -4 -13  -2 1355.31   26.54
   4 -13   2 1349.78   24.55
   4 -13   3  204.34   10.31
  -4 -13  -3  198.03   11.47
  -4 -13  -4    0.69    6.20
   4 -13   4    1.07    4.83
  -4 -13  -5  381.00   15.39
  -4 -13  -6  269.70   13.70
  -4 -13  -7  138.36   10.67
  -4 -13  -8 1264.80   27.09
  -4 -13  -9  134.49   10.74
  -4 -13  -9  116.92   13.19
  -4 -13 -10  320.07   14.23
  -4 -13 -10  327.73   19.31
  -4 -13 -11  750.91   28.06
  -4 -13 -12   19.52   12.48
  -4 -13 -13   57.01   14.87
   4 -12 -14   47.19   16.24
   4 -12 -13   29.08   15.40
   4 -12 -12  174.95   19.65
   4 -12 -11   41.17   12.94
   4 -12 -11   75.53   10.24
   4 -12 -10 1460.51   39.95
   4 -12 -10 1569.09   31.60
   4 -12  -9   -1.91    7.13
   4 -12  -9   -8.99   11.90
   4 -12  -8    8.62    7.04
   4 -12  -8   12.12   10.53
   4 -12  -7   33.76    7.93
   4 -12  -6  216.37   12.70
  -4 -12   6  261.11   11.41
   4 -12  -5   82.45    9.00
  -4 -12   5  104.49    8.13
   4 -12  -4 2903.03   39.30
  -4 -12   4 2853.11   34.58
   4 -12  -3  219.65   11.84
  -4 -12   3  222.95   10.76
   4 -12  -2 1902.94   30.47
  -4 -12   2 1900.87   28.60
   4 -12  -1  172.84   10.27
  -4 -12   1  167.15    9.71
   4 -12   0  877.82   20.05
  -4 -12   0  872.14   20.31
  -4 -12  -1    6.35    5.67
   4 -12   1    7.72    5.56
   4 -12   2  569.79   15.75
  -4 -12  -2  550.17   16.78
  -4 -12  -3   72.83    7.81
   4 -12   3   68.32    6.69
  -4 -12  -4  757.25   19.91
   4 -12   4  721.93   16.67
  -4 -12  -5   93.09    8.76
  -4 -12  -6  613.09   18.55
  -4 -12  -7   60.84    7.99
  -4 -12  -8   89.71    9.12
  -4 -12  -8  112.43   11.96
  -4 -12  -9   46.20    7.89
  -4 -12  -9   41.56   10.56
  -4 -12 -10  929.04   21.44
  -4 -12 -10  905.25   28.54
  -4 -12 -11   51.03   12.18
  -4 -12 -12 1227.14   36.93
  -4 -12 -13   54.90   14.90
  -4 -12 -14  232.93   20.85
   4 -11 -14  509.76   29.81
   4 -11 -13   66.28   17.00
   4 -11 -12  195.86   19.51
   4 -11 -11  334.34   14.76
   4 -11 -11  317.78   21.45
   4 -11 -10  153.11   16.19
   4 -11 -10  172.56   12.20
   4 -11  -9  147.95   15.11
   4 -11  -9  180.38   12.17
   4 -11  -8  911.20   28.43
   4 -11  -8  882.98   23.12
   4 -11  -7   33.45    7.59
   4 -11  -6 1701.52   30.86
  -4 -11   6 1743.04   26.42
  -4 -11   5   50.75    6.31
   4 -11  -5   51.67    7.83
   4 -11  -4  212.81   11.85
  -4 -11   4  184.29    9.53
   4 -11  -3  367.52   14.23
  -4 -11   3  417.21   13.56
  -4 -11   2  290.44   11.43
   4 -11  -2  300.50   12.60
   4 -11  -1  150.42    9.20
  -4 -11   1  164.68    9.35
   4 -11   0 1616.79   25.98
  -4 -11   0 1629.46   26.38
   4 -11   1  279.56   11.31
  -4 -11  -1  266.57   11.58
   4 -11   2 2270.12   29.21
  -4 -11  -2 2338.33   32.20
   4 -11   3  165.11    8.60
  -4 -11  -3  160.58    9.67
  -4 -11  -4  282.04   12.31
   4 -11   4  308.97   10.84
  -4 -11  -5  645.67   17.91
  -4 -11  -5  680.46   14.46
  -4 -11  -6  151.76   10.10
  -4 -11  -6  147.53    8.77
  -4 -11  -7   59.86    7.54
  -4 -11  -7   70.26    7.73
  -4 -11  -8 2142.99   31.86
  -4 -11  -8 2144.02   38.09
  -4 -11  -8 2079.23   32.21
  -4 -11  -9   94.26    8.54
  -4 -11  -9   81.82    9.93
  -4 -11  -9   86.95   11.72
  -4 -11 -10  240.86   14.85
  -4 -11 -10  239.45   16.33
  -4 -11 -10  240.64   11.24
  -4 -11 -11  300.75   17.37
  -4 -11 -11  303.09   18.70
  -4 -11 -12   27.82   12.17
  -4 -11 -13  111.56   15.97
  -4 -11 -14  361.37   23.92
   4 -10 -14   97.94   18.82
   4 -10 -13  311.27   23.07
   4 -10 -12  100.28   16.02
   4 -10 -11   57.31    8.16
   4 -10 -11   44.55   12.79
   4 -10 -10  703.73   27.46
   4 -10 -10  779.77   20.73
   4 -10  -9  833.68   21.72
   4 -10  -9  792.35   27.87
   4 -10  -8  274.01   16.97
   4 -10  -8  270.65   13.42
  -4 -10   7  908.62   18.99
   4 -10  -7  957.47   22.71
   4 -10  -6   60.15    7.91
  -4 -10   6   57.57    6.40
   4 -10  -5 1020.00   22.85
  -4 -10   5  988.68   19.39
   4 -10  -4  346.52   13.77
  -4 -10   4  356.85   12.24
  -4 -10   3   54.68    6.24
   4 -10  -3   42.57    6.51
   4 -10  -2  389.02   13.50
  -4 -10   2  439.78   13.21
   4 -10  -1 1733.25   26.37
  -4 -10   1 1711.63   25.49
   4 -10   0   27.34    5.28
  -4 -10   0   35.97    5.46
   4 -10   1 1177.31   20.81
  -4 -10  -1 1164.37   21.81
   4 -10   2  438.70   12.79
  -4 -10  -2  420.13   13.87
  -4 -10  -3  861.74   19.34
   4 -10   3  926.22   17.64
  -4 -10  -3  923.35   12.02
  -4 -10  -4  960.87   14.61
   4 -10   4  898.67   16.92
  -4 -10  -4  940.23   20.41
   4 -10   5  213.13    8.82
  -4 -10  -5  200.44    8.41
  -4 -10  -5  236.18   11.04
  -4 -10  -6  718.97   18.38
  -4 -10  -6  720.77   16.35
  -4 -10  -7  826.99   19.31
  -4 -10  -7  796.95   18.76
  -4 -10  -8   14.49    7.70
  -4 -10  -8   19.98    6.14
  -4 -10  -8   10.56    6.82
  -4 -10  -9  357.68   12.79
  -4 -10  -9  345.42   15.55
  -4 -10  -9  396.05   18.20
  -4 -10 -10  161.77   14.25
  -4 -10 -10  168.27   13.08
  -4 -10 -11  143.55   13.66
  -4 -10 -11  143.99   14.57
  -4 -10 -12  409.76   20.85
  -4 -10 -12  427.98   22.80
  -4 -10 -13  466.37   24.02
  -4 -10 -13  426.67   23.89
  -4 -10 -14   15.51   12.78
   4  -9 -14    4.65   14.12
   4  -9 -13  201.97   19.41
   4  -9 -12    0.30   11.40
   4  -9 -11 1238.37   36.46
   4  -9 -11 1385.43   24.84
   4  -9 -10   17.31   10.08
   4  -9 -10   35.21    7.63
   4  -9  -9  549.53   23.07
   4  -9  -9  540.49   17.26
   4  -9  -8  114.56   12.40
   4  -9  -8  102.33    9.12
  -4  -9   7   38.93    5.90
   4  -9  -7   41.54    7.04
   4  -9  -7   32.79    9.00
   4  -9  -6   34.68    6.76
  -4  -9   6   39.08    5.62
   4  -9  -6   33.55    4.55
   4  -9  -5 1833.70   29.40
  -4  -9   5 1915.74   25.86
   4  -9  -4   88.16    7.97
  -4  -9   4   84.46    6.76
   4  -9  -3 2890.32   35.21
  -4  -9   3 2916.91   31.77
   4  -9  -3 2861.47   33.26
   4  -9  -2   62.24    6.88
   4  -9  -2   85.09    7.51
  -4  -9   2   78.60    6.58
   4  -9  -1  715.25   16.90
  -4  -9   1  739.09   16.47
  -4  -9   0   24.57    5.13
   4  -9   0   14.82    4.62
   4  -9   1   34.24    5.13
  -4  -9  -1   34.92    5.52
  -4  -9  -2  106.56    3.26
   4  -9   2  119.03    7.15
  -4  -9  -2  117.95    7.98
   4  -9   3 2564.73   27.83
  -4  -9  -3 2558.17   19.07
  -4  -9  -3 2509.68   31.22
  -4  -9  -4  268.39   11.19
   4  -9   4  273.67    9.41
  -4  -9  -4  269.98    8.15
  -4  -9  -5 1477.13   24.33
   4  -9   5 1524.68   20.44
  -4  -9  -5 1498.19   20.37
  -4  -9  -6  178.49    9.68
  -4  -9  -6  165.39    8.74
  -4  -9  -7  607.04   15.82
  -4  -9  -7  600.72   19.30
  -4  -9  -7  571.31   15.91
  -4  -9  -8   56.03    6.72
  -4  -9  -8   56.56    8.03
  -4  -9  -8   42.03    8.52
  -4  -9  -9  488.09   13.71
  -4  -9  -9  472.73   17.49
  -4  -9  -9  510.96   19.71
  -4  -9 -10   24.97    9.27
  -4  -9 -10   18.15    8.35
  -4  -9 -11  935.87   27.61
  -4  -9 -11  968.66   30.06
  -4  -9 -12   19.59   10.54
  -4  -9 -12   13.40   11.22
  -4  -9 -13  925.35   32.80
  -4  -9 -13  823.09   29.57
  -4  -9 -14   29.98   13.63
  -4  -9 -14   10.76   12.27
  -4  -9 -15   11.96   13.95
   4  -8 -15  621.17   31.96
   4  -8 -14   64.63   16.46
   4  -8 -13  356.46   23.49
   4  -8 -12   43.36   13.51
   4  -8 -11  169.69   16.96
   4  -8 -10  171.71   10.03
   4  -8 -10  187.39   15.87
   4  -8  -9 1037.10   29.52
   4  -8  -9 1062.35   22.23
   4  -8  -8   87.87    8.30
   4  -8  -8   80.62   11.15
  -4  -8   7  775.84   16.90
   4  -8  -7  770.69   19.36
   4  -8  -7  812.50   23.72
   4  -8  -7  734.33   14.12
  -4  -8   6  316.76   11.06
   4  -8  -6  303.20   12.55
   4  -8  -6  299.87    8.48
  -4  -8   5 2239.39   27.24
   4  -8  -5 2292.31   31.69
   4  -8  -4  984.94   20.83
  -4  -8   4 1077.55   18.99
   4  -8  -3  203.17   10.05
   4  -8  -3  202.55    9.96
  -4  -8   3  208.99    9.00
   4  -8  -2 1950.65   27.51
  -4  -8   2 1981.54   25.69
   4  -8  -1 1383.74   22.37
  -4  -8   1 1291.63   20.84
   4  -8   0  128.85    7.46
  -4  -8   0  133.53    7.68
  -4  -8  -1 1972.04   26.02
   4  -8   1 1985.97   25.01
  -4  -8  -2  261.29    4.36
   4  -8   2  289.32    9.76
  -4  -8  -2  285.80   10.71
   4  -8   3  740.00   14.66
  -4  -8  -3  806.91   10.90
  -4  -8  -3  741.47   16.70
  -4  -8  -4  343.82   11.77
   4  -8   4  365.39   10.29
  -4  -8  -4  360.20    9.14
  -4  -8  -5  179.31    9.04
  -4  -8  -5  178.51    7.99
   4  -8   5  173.14    7.42
  -4  -8  -6  154.01    8.63
  -4  -8  -6  136.46    8.14
  -4  -8  -7 1783.87   24.97
  -4  -8  -7 1798.46   27.22
  -4  -8  -7 1809.71   30.51
  -4  -8  -8  127.29    7.96
  -4  -8  -8  155.47   10.35
  -4  -8  -8  138.09   11.36
  -4  -8  -9  567.04   13.46
  -4  -8  -9  529.40   18.50
  -4  -8  -9  561.42   20.17
  -4  -8 -10  337.24   16.54
  -4  -8 -10  338.78   17.68
  -4  -8 -11  193.12   15.54
  -4  -8 -11  170.76   14.57
  -4  -8 -12  501.90   22.50
  -4  -8 -12  511.39   23.73
  -4  -8 -13  378.72   22.37
  -4  -8 -13  342.91   20.63
  -4  -8 -14  212.81   18.90
  -4  -8 -14  196.15   19.46
  -4  -8 -15  599.20   30.68
  -4  -8 -15  550.87   27.93
   4  -7 -15   37.37   16.07
   4  -7 -14 1087.73   38.60
   4  -7 -13   99.20   15.16
   4  -7 -12  376.86   22.30
   4  -7 -11  743.98   27.78
   4  -7 -10  109.66   13.62
   4  -7 -10  123.56    8.47
   4  -7  -9  235.11   15.96
   4  -7  -9  247.59   11.14
   4  -7  -8  521.19   20.45
   4  -7  -8  551.88   15.91
   4  -7  -7  155.82    9.65
   4  -7  -7  142.13   11.90
  -4  -7   7  151.12    8.25
   4  -7  -7  128.90    6.65
  -4  -7   6 2223.42   27.05
   4  -7  -6 2127.83   20.48
   4  -7  -6 2156.61   30.16
  -4  -7   5   75.24    6.18
   4  -7  -5   66.40    7.01
   4  -7  -5   67.36    4.27
   4  -7  -4   86.73    7.49
  -4  -7   4   78.01    6.25
   4  -7  -3 1271.24   22.25
  -4  -7   3 1292.56   20.05
   4  -7  -3 1356.56   21.71
   4  -7  -2  207.41    9.04
   4  -7  -2  210.50    9.57
  -4  -7   2  191.87    8.41
   4  -7  -1   60.74    6.06
  -4  -7   1   49.97    5.43
   4  -7   0 2195.31   26.62
  -4  -7   0 2179.18   26.21
  -4  -7  -1  115.08    7.01
   4  -7   1  107.55    6.89
   4  -7   2  742.76   14.82
  -4  -7  -2  727.75   15.73
  -4  -7  -3 1591.24   22.91
   4  -7   3 1604.26   20.92
  -4  -7  -3 1650.21   15.41
  -4  -7  -4  234.11    9.44
   4  -7   4  233.73    8.50
  -4  -7  -4  214.85    7.42
  -4  -7  -5  657.70   15.06
  -4  -7  -5  678.61   14.05
   4  -7   5  668.76   13.17
  -4  -7  -6 1119.10   19.42
  -4  -7  -6 1130.81   19.74
  -4  -7  -6 1178.99   23.38
  -4  -7  -7  246.83    9.54
  -4  -7  -7  241.64   12.37
  -4  -7  -7  266.48   11.70
  -4  -7  -8  924.80   16.58
  -4  -7  -8  913.08   21.75
  -4  -7  -8  956.01   24.03
  -4  -7  -9  159.21    7.05
  -4  -7  -9  180.10   12.17
  -4  -7  -9  184.73   13.24
  -4  -7 -10  517.70   20.85
  -4  -7 -10  503.24   19.44
  -4  -7 -11  107.76   11.82
  -4  -7 -11  112.43   12.99
  -4  -7 -12  125.67   14.44
  -4  -7 -12  154.81   15.23
  -4  -7 -13  330.60   20.51
  -4  -7 -13  312.41   20.32
  -4  -7 -14  377.97   23.51
  -4  -7 -14  346.88   23.31
  -4  -7 -15   45.90   14.34
  -4  -7 -15   76.89   16.23
   4  -6 -15    3.00   14.05
   4  -6 -14   10.33   13.39
   4  -6 -13  117.37   15.77
   4  -6 -12 1144.00   34.74
   4  -6 -11   16.08   10.34
   4  -6 -10  719.83   15.82
   4  -6 -10  720.15   25.46
   4  -6  -9   25.07    5.52
   4  -6  -9   28.60    9.09
   4  -6  -8  329.56   10.45
  -4  -6   8  344.43   11.81
   4  -6  -8  335.08   16.77
   4  -6  -8  346.68   12.36
  -4  -6   7   20.30    4.96
   4  -6  -7   28.05    7.84
   4  -6  -7   33.16    5.77
   4  -6  -7   28.65    4.29
  -4  -6   6  929.53   17.64
   4  -6  -6  892.65   19.11
   4  -6  -6  898.38   12.94
  -4  -6   5   86.59    6.56
   4  -6  -5   92.16    7.34
   4  -6  -5   89.40    4.34
   4  -6  -4 2648.37   29.08
  -4  -6   4 2760.79   28.84
   4  -6  -4 2744.23   32.03
   4  -6  -3  646.77   14.76
   4  -6  -3  705.04   16.25
  -4  -6   3  739.27   15.10
   4  -6  -2 5843.27   44.37
  -4  -6   2 5749.52   40.67
   4  -6  -2 5871.11   40.54
   4  -6  -1   77.71    6.36
  -4  -6   1   77.43    5.80
   4  -6   0   82.60    6.10
  -4  -6   0   73.65    5.67
   4  -6   1   50.74    5.17
  -4  -6  -1   55.50    5.49
   4  -6   2  111.64    6.46
  -4  -6  -2  116.63    6.93
  -4  -6  -3   22.33    4.35
   4  -6   3   32.22    4.31
  -4  -6  -3   19.19    3.23
  -4  -6  -4 5627.43   40.78
   4  -6   4 5703.59   37.30
  -4  -6  -4 5511.20   33.81
  -4  -6  -5  299.54   10.10
   4  -6   5  317.37    9.28
  -4  -6  -5  287.69    9.82
  -4  -6  -6  921.72   16.68
  -4  -6  -6  977.79   18.64
   4  -6   6  897.64   14.78
  -4  -6  -6  949.24   20.59
  -4  -6  -7   49.44    4.99
  -4  -6  -7   41.24    7.00
  -4  -6  -7   40.23    7.22
  -4  -6  -8   16.24    7.00
  -4  -6  -8   16.51    4.02
  -4  -6  -8   13.86    6.50
  -4  -6  -9  131.53   10.98
  -4  -6  -9  101.91   10.65
  -4  -6 -10  541.79   20.10
  -4  -6 -10  513.94   20.65
  -4  -6 -11  163.32   14.17
  -4  -6 -11  179.98   14.44
  -4  -6 -12 1575.27   38.62
  -4  -6 -12 1482.06   36.21
  -4  -6 -13  109.96   14.95
  -4  -6 -13  103.68   15.54
  -4  -6 -14  254.94   20.28
  -4  -6 -14  248.60   20.23
  -4  -6 -15   -2.50   14.17
  -4  -6 -15   -6.20   14.43
  -4  -6 -16   22.48   14.77
   4  -5 -15   71.23   16.73
   4  -5 -14  803.11   33.07
   4  -5 -13  108.22   16.11
   4  -5 -12  527.58   24.27
   4  -5 -11  260.99   17.49
   4  -5 -10   58.85    5.45
   4  -5 -10   55.60   10.65
   4  -5  -9  127.16    7.55
   4  -5  -9  110.94   11.69
   4  -5  -8  738.51   14.63
  -4  -5   8  753.94   16.56
   4  -5  -8  790.26   23.21
   4  -5  -8  800.61   17.20
   4  -5  -7  147.10    6.59
   4  -5  -7  160.31    8.74
   4  -5  -7  137.16   11.01
  -4  -5   7  150.72    7.99
  -4  -5   6 1707.30   23.53
   4  -5  -6 1755.53   29.60
   4  -5  -6 1746.27   25.41
   4  -5  -6 1782.58   17.54
  -4  -5   5  760.61   15.57
   4  -5  -5  724.17   16.71
   4  -5  -5  759.80    9.91
  -4  -5   4  543.89   12.96
   4  -5  -4  542.47   13.11
   4  -5  -4  585.69   14.86
   4  -5  -4  562.22    7.10
  -4  -5   3  486.88   12.09
   4  -5  -3  471.47   13.20
   4  -5  -3  438.50   11.69
   4  -5  -3  439.32    5.18
   4  -5  -2  760.89   15.94
   4  -5  -2  735.45   14.40
  -4  -5   2  787.66   15.04
   4  -5  -1  342.57   10.73
  -4  -5   1  321.09    9.97
  -4  -5   0 2142.10   24.34
   4  -5   0 2114.51   24.76
   4  -5   1   69.32    5.66
  -4  -5  -1   81.27    5.81
   4  -5   2 1032.60   16.73
  -4  -5  -2  952.03   16.53
   4  -5   3 2135.78   23.16
  -4  -5  -3 2131.14   18.58
  -4  -5  -3 2018.92   23.60
   4  -5   4  542.24   11.80
  -4  -5  -4  537.45   11.41
  -4  -5  -4  555.05   12.57
  -4  -5  -5  187.78    7.87
   4  -5   5  174.76    7.10
  -4  -5  -5  185.34    8.15
  -4  -5  -5  177.33    9.34
  -4  -5  -6 2635.80   26.01
  -4  -5  -6 2691.00   30.41
   4  -5   6 2589.58   24.72
  -4  -5  -6 2772.75   33.58
  -4  -5  -7  547.86   11.67
  -4  -5  -7  563.98   16.04
  -4  -5  -7  565.36   17.03
  -4  -5  -8  754.79   19.87
  -4  -5  -8  848.70   12.45
  -4  -5  -8  793.08   21.57
  -4  -5  -9  230.25   13.16
  -4  -5  -9  244.92   14.14
  -4  -5 -10 1012.75   26.56
  -4  -5 -10  991.78   27.14
  -4  -5 -11  196.59   14.84
  -4  -5 -11  241.01   16.46
  -4  -5 -12   95.09   13.56
  -4  -5 -12  108.94   13.75
  -4  -5 -13  195.98   17.70
  -4  -5 -13  219.60   18.48
  -4  -5 -14  357.74   22.76
  -4  -5 -14  389.22   23.77
  -4  -5 -15   79.93   14.82
  -4  -5 -15   55.92   16.42
  -4  -5 -16  495.75   28.98
   4  -4 -16    4.23   14.76
   4  -4 -15  569.73   29.73
   4  -4 -14   30.09   13.70
   4  -4 -13  394.87   22.97
   4  -4 -12  794.42   28.60
   4  -4 -11   52.11   11.59
   4  -4 -10  357.83   18.18
   4  -4  -9 1160.00   20.27
   4  -4  -9 1179.84   18.10
  -4  -4   9 1166.59   21.15
   4  -4  -9 1168.24   28.92
   4  -4  -8  446.26   11.77
  -4  -4   8  437.48   12.88
   4  -4  -8  408.42   16.77
   4  -4  -8  463.72   12.58
   4  -4  -7 2141.82   21.85
   4  -4  -7 2231.33   34.99
  -4  -4   7 2123.86   26.60
   4  -4  -7 2147.78   26.76
   4  -4  -6   69.96    4.42
   4  -4  -6   83.65    6.80
  -4  -4   6   75.68    5.98
   4  -4  -6   80.11    8.69
   4  -4  -5 1778.07   14.27
  -4  -4   5 1702.22   22.69
   4  -4  -5 1795.47   24.80
   4  -4  -4  517.85    5.95
   4  -4  -4  538.19   12.58
  -4  -4   4  514.65   12.59
   4  -4  -4  504.62   13.64
  -4  -4   3   95.84    6.07
   4  -4  -3   90.42    6.66
   4  -4  -3   87.84    5.98
  -4  -4   2  303.81    9.60
   4  -4  -2  308.39   10.45
   4  -4  -2  292.21    9.38
  -4  -4   1  825.84   15.01
   4  -4  -1  858.45   16.28
   4  -4   0   75.73    5.81
  -4  -4   0   95.09    5.97
   4  -4   1 1913.04   22.78
  -4  -4  -1 1906.08   22.28
  -4  -4  -2  832.06   14.84
   4  -4   2  820.89   14.74
   4  -4   3  703.06   13.51
  -4  -4  -3  688.63   13.43
   4  -4   4 1576.17   19.70
  -4  -4  -4 1525.22   19.00
  -4  -4  -4 1619.36   21.44
  -4  -4  -4 1545.23   19.53
  -4  -4  -5  176.71    7.09
  -4  -4  -5  182.03    8.39
   4  -4   5  166.17    7.04
  -4  -4  -5  167.85    8.71
  -4  -4  -6  663.90   12.24
  -4  -4  -6  653.54   15.90
   4  -4   6  634.14   12.57
  -4  -4  -6  631.08   16.42
  -4  -4  -7 1337.10   15.70
  -4  -4  -7 1285.87   23.73
  -4  -4  -7 1359.90   25.67
  -4  -4  -8  143.54   10.40
  -4  -4  -8  151.28   10.85
  -4  -4  -9 1313.61   28.24
  -4  -4  -9 1379.80   29.31
  -4  -4 -10  203.85   14.06
  -4  -4 -10  189.68   13.62
  -4  -4 -11   88.26   12.20
  -4  -4 -11   79.28   11.92
  -4  -4 -12   78.44   12.68
  -4  -4 -12   79.10   13.34
  -4  -4 -13  356.98   20.94
  -4  -4 -13  345.48   21.10
  -4  -4 -14  219.55   19.77
  -4  -4 -14  226.48   19.31
  -4  -4 -15  718.56   31.89
  -4  -4 -15  652.37   31.27
  -4  -4 -16  142.43   19.78
   4  -3 -16  -10.71   15.39
   4  -3 -15   60.19   15.70
   4  -3 -14   24.59   13.67
   4  -3 -13  393.86   22.67
   4  -3 -12  115.20   14.51
   4  -3 -11 1470.31   35.22
   4  -3 -10  142.48   12.76
   4  -3  -9 1956.73   26.43
   4  -3  -9 1950.61   21.02
  -4  -3   9 2047.28   27.46
   4  -3  -9 1965.41   36.29
   4  -3  -8   90.04    6.44
   4  -3  -8   89.35    6.13
   4  -3  -8   84.64    9.85
  -4  -3   8  100.42    7.16
   4  -3  -7   51.80    4.85
  -4  -3   7   48.53    5.74
   4  -3  -7   40.80    7.98
   4  -3  -7   67.33    5.91
   4  -3  -6   73.71    4.46
   4  -3  -6   81.93    6.37
  -4  -3   6   70.76    6.02
   4  -3  -6   90.34    8.64
  -4  -3   5  641.31   14.05
   4  -3  -5  669.13   16.75
   4  -3  -5  656.31   14.69
   4  -3  -5  674.14    9.04
   4  -3  -4  337.30    9.98
  -4  -3   4  328.88   10.25
   4  -3  -4  337.57    4.41
   4  -3  -4  321.05   10.68
  -4  -3   3 2032.07   23.57
   4  -3  -3 2053.60   25.25
   4  -3  -3 2076.41   22.41
  -4  -3   2  200.79    7.82
   4  -3  -2  208.18    8.66
  -4  -3   1  983.18   16.01
   4  -3  -1 1001.52   17.36
  -4  -3   0   33.99    4.38
   4  -3   0   29.74    4.48
   4  -3   1 1033.90   16.97
  -4  -3  -1 1096.97   16.49
   4  -3   2  277.45    9.14
  -4  -3  -2  272.37    8.58
   4  -3   3 3251.50   28.79
  -4  -3  -3 3202.55   27.26
   4  -3   4  360.16    9.98
  -4  -3  -4  355.55   10.56
  -4  -3  -4  351.72    9.20
  -4  -3  -4  338.12    9.84
  -4  -3  -5 4743.65   30.94
   4  -3   5 4665.52   33.57
  -4  -3  -5 4732.31   38.09
  -4  -3  -5 4695.76   39.30
  -4  -3  -6  336.42    8.02
  -4  -3  -6  322.73   11.89
   4  -3   6  341.44    9.58
  -4  -3  -6  327.11   12.47
   4  -3   7  608.29   12.76
  -4  -3  -7  673.20    9.19
  -4  -3  -7  655.49   17.52
  -4  -3  -7  629.20   17.72
  -4  -3  -8   38.39    7.16
  -4  -3  -8   43.41    7.69
  -4  -3  -9  143.85   11.19
  -4  -3  -9  141.99   11.52
  -4  -3 -10   34.62    8.85
  -4  -3 -10   37.41    9.26
  -4  -3 -11  959.86   28.28
  -4  -3 -11  943.30   28.02
  -4  -3 -12   65.17   12.21
  -4  -3 -12   61.47   11.97
  -4  -3 -13  643.95   26.88
  -4  -3 -13  574.86   26.12
  -4  -3 -14  -14.46   13.58
  -4  -3 -14   10.90   13.26
  -4  -3 -15    7.05   12.84
  -4  -3 -15   14.55   13.36
  -4  -3 -16   -6.38   15.35
  -4  -3 -16   28.22   15.63
   4  -2 -16  175.59   21.05
   4  -2 -15  324.16   24.13
   4  -2 -14  118.43   16.27
   4  -2 -13  777.53   29.63
   4  -2 -12  123.88   14.37
   4  -2 -11   55.57   11.02
   4  -2 -10  514.61   20.29
   4  -2  -9  181.19    6.00
  -4  -2   9  173.30    9.04
   4  -2  -9  167.45   12.47
   4  -2  -9  190.37    9.55
   4  -2  -8  291.97   10.14
   4  -2  -8  279.79    8.58
  -4  -2   8  300.24   10.84
   4  -2  -8  270.82   13.99
  -4  -2   7 2982.28   31.08
   4  -2  -7 3097.47   28.22
   4  -2  -7 3042.24   38.25
   4  -2  -7 3046.03   27.14
   4  -2  -6  361.69   10.53
   4  -2  -6  358.15    8.69
  -4  -2   6  367.18   11.17
   4  -2  -6  365.38   13.56
   4  -2  -5  614.04   13.65
  -4  -2   5  632.70   14.09
   4  -2  -5  613.98   15.76
   4  -2  -5  636.25    9.30
  -4  -2   4  558.29   12.79
   4  -2  -4  570.42   12.01
   4  -2  -4  563.45   13.25
  -4  -2   3   87.01    5.86
   4  -2  -3   88.90    5.47
   4  -2  -3   82.85    6.05
  -4  -2   2  990.67   16.15
   4  -2  -2  987.07   17.16
  -4  -2   1 2135.52   23.03
   4  -2  -1 2248.00   25.14
   4  -2   0  506.73   12.12
  -4  -2   0  500.46   11.32
  -4  -2  -1 4741.01   32.94
   4  -2   1 4510.41   34.37
  -4  -2  -2  916.47   13.07
  -4  -2  -2  872.36   14.08
   4  -2   2  890.62   15.33
  -4  -2  -3  327.15    8.72
   4  -2   3  314.68    9.39
  -4  -2  -3  321.72    9.01
  -4  -2  -4  187.59    7.96
   4  -2   4  191.82    7.48
  -4  -2  -4  202.42    6.82
  -4  -2  -5  251.25    6.93
   4  -2   5  241.23    8.18
  -4  -2  -5  249.83    9.92
  -4  -2  -5  220.72    9.57
  -4  -2  -6  412.66    7.58
  -4  -2  -6  399.56   13.34
   4  -2   6  407.53   10.53
  -4  -2  -6  388.76   13.21
   4  -2   7 1500.43   19.58
  -4  -2  -7 1437.79   25.79
  -4  -2  -7 1487.01   26.41
  -4  -2  -8  141.40   10.77
  -4  -2  -8  173.52   11.33
  -4  -2  -9 1669.18   32.11
  -4  -2  -9 1568.45   31.12
  -4  -2 -10  212.64   14.48
  -4  -2 -10  229.77   14.58
  -4  -2 -11  148.32   13.79
  -4  -2 -11  134.47   13.83
  -4  -2 -12  343.98   19.63
  -4  -2 -12  377.28   20.27
  -4  -2 -13  116.66   14.78
  -4  -2 -13   96.95   14.20
  -4  -2 -14   69.51   13.81
  -4  -2 -14   78.75   15.80
  -4  -2 -15  564.99   29.09
  -4  -2 -15  539.35   29.17
  -4  -2 -16  117.74   18.78
  -4  -2 -16  141.14   20.69
   4  -1 -16  560.85   30.94
   4  -1 -15   10.99   13.50
   4  -1 -14  685.75   29.78
   4  -1 -13  200.51   17.88
   4  -1 -12  308.76   18.90
   4  -1 -11  739.38   25.09
   4  -1 -10   61.70    7.88
  -4  -1  10   67.46    7.12
   4  -1 -10   58.80    9.57
   4  -1  -9 1024.85   20.49
  -4  -1   9 1088.00   20.55
   4  -1  -9 1004.42   25.36
   4  -1  -8 1654.01   23.55
   4  -1  -8 1696.20   17.46
  -4  -1   8 1682.14   24.40
   4  -1  -8 1684.44   30.45
   4  -1  -7   41.23    4.54
   4  -1  -7   39.18    4.98
  -4  -1   7   33.09    4.95
   4  -1  -7   26.70    7.17
   4  -1  -6  734.80   12.73
   4  -1  -6  731.76   13.80
  -4  -1   6  710.50   15.08
   4  -1  -6  722.75   17.64
   4  -1  -5   27.31    4.11
   4  -1  -5   35.94    3.57
  -4  -1   5   34.17    4.53
   4  -1  -5   30.47    5.78
   4  -1  -4  171.90    8.26
   4  -1  -4  175.00    7.65
  -4  -1   4  167.34    7.58
   4  -1  -4  166.01    6.77
   4  -1  -3  354.46   10.32
  -4  -1   3  352.48   10.25
   4  -1  -3  378.18    9.32
  -4  -1   2 1397.31   19.39
   4  -1  -2 1331.54   19.28
  -4  -1   1  187.55    7.41
   4  -1  -1  209.27    8.30
  -4  -1   0 4014.05   30.44
   4  -1   0 4019.56   32.61
  -4  -1  -1 1159.42   16.04
  -4  -1  -1 1115.45   12.36
   4  -1   1 1165.08   17.66
  -4  -1  -2 3125.96   25.26
  -4  -1  -2 3080.95   23.14
   4  -1   2 3068.04   27.88
   4  -1   3  656.20   13.06
  -4  -1  -3  664.24   11.48
  -4  -1  -3  633.97   12.30
   4  -1   4  178.15    7.37
  -4  -1  -4  172.28    7.93
  -4  -1  -4  174.92    5.91
   4  -1   5 2218.11   23.40
  -4  -1  -5 2156.38   17.00
  -4  -1  -5 2112.38   26.39
   4  -1   6  535.94   12.04
  -4  -1  -6  503.58    5.83
  -4  -1  -6  522.01   15.29
  -4  -1  -6  483.27   14.32
   4  -1   7  140.57    7.03
  -4  -1  -7  143.62   10.19
  -4  -1  -7  118.10    9.06
   4  -1   8 3146.32   29.34
  -4  -1  -8 3053.00   40.70
  -4  -1  -8 3118.40   40.53
  -4  -1  -9  192.29   12.62
  -4  -1  -9  171.24   12.34
  -4  -1 -10  472.01   19.25
  -4  -1 -10  518.51   20.67
  -4  -1 -11  442.79   20.22
  -4  -1 -11  425.39   20.56
  -4  -1 -12  122.05   13.78
  -4  -1 -12  105.06   13.94
  -4  -1 -13   55.49   13.03
  -4  -1 -13   83.77   14.97
  -4  -1 -14  529.06   26.69
  -4  -1 -14  459.86   25.52
  -4  -1 -15   10.76   13.41
  -4  -1 -15   19.30   14.24
  -4  -1 -16  219.11   21.72
  -4  -1 -16  202.28   22.72
   4   0 -16  412.75   27.16
   4   0 -15  -12.22   13.86
   4   0 -14   45.59   12.50
   4   0 -13   17.70   11.15
   4   0 -12  640.00   25.07
   4   0 -11   73.30   11.58
   4   0 -10 2369.32   34.30
  -4   0  10 2478.83   31.95
   4   0 -10 2386.98   40.44
   4   0  -9   86.40    8.21
  -4   0   9   85.37    7.25
   4   0  -9   73.93    9.42
   4   0  -8  448.30   16.31
   4   0  -8  476.23   13.68
  -4   0   8  491.85   13.91
   4   0  -8  479.27    8.01
   4   0  -7    2.05    4.31
  -4   0   7    2.95    4.13
   4   0  -7    9.32    3.02
   4   0  -7    8.36    6.20
   4   0  -6  104.82    6.22
   4   0  -6   94.29    5.38
  -4   0   6  100.44    6.72
   4   0  -6   98.87    8.04
   4   0  -5  166.86    7.04
  -4   0   5  154.91    7.53
   4   0  -5  151.79    8.39
   4   0  -4 4595.05   35.22
  -4   0   4 4451.74   35.31
   4   0  -4 4644.74   29.84
   4   0  -3  252.51    8.61
  -4   0   3  242.11    8.87
   4   0  -3  232.16    7.51
   4   0  -2  632.58   13.10
  -4   0   2  656.67   13.32
   4   0  -1  278.83    9.09
  -4   0   1  281.68    8.83
  -4   0   1  257.88    3.81
   4   0   0 3801.86   31.07
  -4   0   0 3805.61   29.29
  -4   0   0 3846.88   18.46
   4   0   1    5.56    3.35
  -4   0  -1    5.43    2.62
  -4   0  -1    6.22    3.11
   4   0   2 3249.77   28.51
  -4   0  -2 3282.55   25.02
  -4   0  -2 3245.30   23.98
   4   0   3  113.48    6.18
  -4   0  -3  120.38    5.12
  -4   0  -3  114.55    5.97
   4   0   4  817.45   14.69
  -4   0  -4  773.09   14.92
  -4   0  -4  772.40   10.64
  -4   0  -5   86.76    3.34
   4   0   5   95.13    5.93
  -4   0  -5   88.79    3.54
  -4   0  -5   91.42    6.99
  -4   0  -6 1519.52   25.79
  -4   0  -6 1582.21   25.18
  -4   0  -7  107.01    9.25
   4   0   7   90.90    5.91
  -4   0  -7   73.15    8.66
  -4   0  -8   29.75    7.77
  -4   0  -8   49.36    8.50
   4   0   8   34.87    4.90
  -4   0  -9  248.97   14.00
  -4   0  -9  204.24   13.22
  -4   0 -10 2110.70   38.49
  -4   0 -10 1917.75   37.87
  -4   0 -11   83.94   11.33
  -4   0 -11  102.50   12.89
  -4   0 -12  731.14   27.12
  -4   0 -12  694.64   26.97
  -4   0 -13   90.41   13.88
  -4   0 -13   69.09   14.76
  -4   0 -14  286.83   20.97
  -4   0 -14  311.24   22.85
  -4   0 -15   44.23   15.11
  -4   0 -15   17.99   13.52
  -4   0 -16  121.00   19.52
   4   1 -16  626.19   31.60
   4   1 -15   22.09   14.06
   4   1 -14  660.06   28.69
   4   1 -13  187.52   16.84
   4   1 -12  301.09   18.71
   4   1 -11  671.34   21.11
  -4   1  11  626.12   17.65
   4   1 -11  653.72   23.53
  -4   1  10   68.82    7.30
   4   1 -10   61.70    8.48
   4   1 -10   68.49   10.02
   4   1  -9 1031.33   22.11
  -4   1   9 1057.96   20.71
   4   1  -9 1029.95   25.17
   4   1  -8 1702.35   26.14
  -4   1   8 1645.89   24.75
   4   1  -8 1674.96   29.36
   4   1  -7   37.14    6.52
   4   1  -7   31.81    5.69
   4   1  -7   39.18    3.41
  -4   1   7   34.61    5.22
  -4   1   6  749.52   15.79
   4   1  -6  708.41   11.88
   4   1  -6  713.29   16.77
  -4   1   5   29.96    4.62
   4   1  -5   40.44    4.04
   4   1  -5   48.22    6.11
   4   1  -4  188.45    7.20
  -4   1   4  162.51    7.56
   4   1  -4  166.38    6.12
   4   1  -4  166.48    7.58
   4   1  -3  353.24    9.85
  -4   1   3  355.56   10.40
   4   1  -3  372.80    9.29
   4   1  -2 1352.19   18.64
  -4   1   2 1331.32   18.65
   4   1  -1  214.44    7.93
  -4   1   1  201.47    7.73
  -4   1   0 4102.60   18.88
   4   1   0 4027.86   31.88
  -4   1   0 3990.05   29.94
   4   1   1 1176.98   17.41
  -4   1  -1 1092.14   15.10
  -4   1  -1 1158.45   12.57
   4   1   2 3131.04   28.33
  -4   1  -2 3231.87   24.12
  -4   1  -2 3187.94   24.14
   4   1   3  641.05   13.19
  -4   1  -3  657.99   12.75
  -4   1  -3  631.00   10.05
   4   1   4  176.99    7.57
  -4   1  -4  180.00    4.87
  -4   1  -4  172.41    7.94
  -4   1  -5 2149.95   27.06
   4   1   5 2076.31   23.66
  -4   1  -6  480.37   14.54
   4   1   6  492.05   12.09
  -4   1  -7  148.25   10.02
   4   1   7  152.83    7.52
  -4   1  -8 3102.87   40.71
  -4   1  -8 3133.27   42.72
   4   1   8 3089.97   30.49
  -4   1  -9  178.74   12.42
  -4   1  -9  205.72   13.69
  -4   1 -10  492.65   20.66
  -4   1 -10  538.29   20.74
  -4   1 -11  476.00   21.22
  -4   1 -11  461.89   21.77
  -4   1 -12  128.73   14.59
  -4   1 -12  121.99   14.09
  -4   1 -13   58.44   13.20
  -4   1 -13   41.38   13.39
  -4   1 -14  487.93   25.79
  -4   1 -14  479.38   26.65
  -4   1 -15   38.96   15.07
  -4   1 -16  227.25   22.62
   4   2 -16  169.00   20.44
   4   2 -15  337.52   23.36
   4   2 -14  109.47   15.87
   4   2 -13  779.99   28.64
   4   2 -12  131.40   13.80
   4   2 -11   54.60    9.61
  -4   2  11   46.51    7.09
   4   2 -11   44.32   10.51
   4   2 -10  500.16   19.31
   4   2 -10  524.67   18.35
  -4   2  10  491.57   15.63
   4   2  -9  187.82   11.49
  -4   2   9  177.06    9.65
   4   2  -9  161.09   11.59
   4   2  -8  275.34   12.14
  -4   2   8  280.90   11.12
   4   2  -8  273.01   12.97
  -4   2   7 3066.29   32.82
   4   2  -7 2962.43   35.23
   4   2  -7 3046.38   17.91
  -4   2   6  355.76   11.55
   4   2  -6  351.88    7.93
   4   2  -6  361.16   12.14
  -4   2   5  603.55   14.08
   4   2  -5  610.88   11.15
   4   2  -5  646.29   14.27
   4   2  -4  546.21    9.58
   4   2  -4  555.52   11.20
  -4   2   4  539.85   12.90
   4   2  -4  559.93   11.97
   4   2  -3   89.83    5.45
  -4   2   3   87.28    5.89
   4   2  -3   69.56    4.82
   4   2  -2  981.92   15.68
  -4   2   2  971.60   16.43
   4   2  -2  934.03   11.77
   4   2  -1 2227.24   23.61
  -4   2   1 2328.10   23.85
  -4   2   0  509.68    7.35
   4   2   0  498.70   11.64
  -4   2   0  499.37   10.94
  -4   2  -1 4593.91   25.95
   4   2   1 4640.12   34.33
  -4   2  -1 4466.34   29.79
  -4   2  -2  870.67   13.20
   4   2   2  917.91   15.71
  -4   2  -2  896.38   12.59
  -4   2  -3  299.59    9.08
   4   2   3  329.18    9.86
  -4   2  -3  319.19    6.94
  -4   2  -4  185.40    8.51
  -4   2  -4  198.70    4.63
   4   2   4  203.22    8.05
  -4   2  -4  188.68    4.22
  -4   2  -5  250.55   10.22
   4   2   5  247.56    8.84
  -4   2  -6  395.95   13.49
   4   2   6  409.58   11.53
  -4   2  -7 1415.37   26.38
   4   2   7 1455.59   21.22
  -4   2  -8  159.80   11.28
   4   2   8  206.30    9.06
  -4   2  -9 1666.24   33.06
   4   2   9 1673.85   24.38
  -4   2 -10  192.06   13.94
  -4   2 -11  113.02   13.45
  -4   2 -11  123.73   13.32
  -4   2 -12  339.37   20.00
  -4   2 -13  107.98   14.81
  -4   2 -14   64.50   14.57
  -4   2 -15  460.38   27.66
  -4   2 -16   94.60   18.84
   4   3 -16   26.91   14.97
   4   3 -15   59.33   15.22
   4   3 -14   16.15   11.98
   4   3 -13  404.13   21.94
   4   3 -12   76.72   12.23
   4   3 -11 1455.72   32.10
  -4   3  11 1469.54   27.34
   4   3 -11 1445.35   33.21
   4   3 -10  155.26   12.07
   4   3 -10  135.88   12.19
  -4   3  10  143.02    9.50
   4   3  -9 2063.86   33.19
  -4   3   9 2011.34   29.52
  -4   3   8   71.45    6.97
   4   3  -8   80.14    8.42
   4   3  -7   45.70    1.75
  -4   3   7   55.83    6.54
   4   3  -7   53.97    7.25
  -4   3   6   54.10    5.74
   4   3  -6   79.30    7.12
   4   3  -6   69.48    3.82
  -4   3   5  669.95   15.07
   4   3  -5  669.82   14.09
   4   3  -5  649.58   11.03
   4   3  -4  331.33    8.56
  -4   3   4  312.48   10.34
   4   3  -4  324.22    8.94
   4   3  -4  321.87    7.10
  -4   3   3 2048.20   24.29
   4   3  -3 1980.16   20.98
   4   3  -3 2053.73   18.62
  -4   3   2  207.58    8.24
   4   3  -2  196.57    7.36
   4   3  -2  202.91    5.39
   4   3  -1  952.04   15.47
  -4   3   1  988.87   15.88
   4   3  -1  967.71    8.85
  -4   3   0   31.93    3.16
   4   3   0   28.79    3.98
  -4   3   0   38.96    4.21
  -4   3  -1 1067.30   13.61
   4   3   1 1051.61   16.64
  -4   3  -1 1037.48   14.55
  -4   3  -2  245.32    7.88
   4   3   2  280.83    9.21
  -4   3  -2  254.28    6.93
  -4   3  -3 3202.43   29.33
   4   3   3 3235.43   29.72
  -4   3  -3 3223.41   19.99
  -4   3  -4  334.51    3.77
  -4   3  -4  335.21   11.11
  -4   3  -4  289.32    3.87
  -4   3  -5 4771.33   42.18
   4   3   5 4779.30   37.10
  -4   3  -6  338.23   13.31
   4   3   6  340.33   10.79
  -4   3  -7  607.12   18.40
   4   3   7  637.89   14.87
  -4   3  -8   53.69    8.56
   4   3   8   40.89    5.53
   4   3   9  142.57    8.40
  -4   3  -9  125.23   11.73
  -4   3 -10   39.41    9.57
  -4   3 -11  916.76   28.75
  -4   3 -12   67.96   13.12
  -4   3 -13  605.27   27.79
  -4   3 -14    4.95   13.38
  -4   3 -15    9.31   14.74
  -4   3 -16   26.77   16.39
   4   4 -16   20.47   15.87
   4   4 -15  581.51   28.38
   4   4 -14   44.59   13.11
   4   4 -13  386.45   21.63
  -4   4  12  723.34   21.09
   4   4 -12  799.19   27.51
  -4   4  11   42.73    7.49
   4   4 -11   37.27    9.40
   4   4 -10  321.67   16.14
  -4   4  10  401.54   14.72
  -4   4   9 1139.14   22.96
   4   4  -9 1078.83   25.12
  -4   4   8  436.75   14.16
   4   4  -8  427.49   15.47
  -4   4   7 2107.67   28.64
   4   4  -7 2100.89   29.42
   4   4  -6   80.57    3.61
  -4   4   6   84.08    6.87
   4   4  -6   86.96    7.21
   4   4  -5 1708.28   21.75
  -4   4   5 1779.86   24.56
   4   4  -5 1732.27   16.92
  -4   4   4  496.27   13.01
   4   4  -4  499.21   10.69
   4   4  -4  495.38   10.25
   4   4  -4  514.13    8.09
   4   4  -3   84.47    5.11
  -4   4   3   88.98    6.10
   4   4  -3   89.91    4.58
  -4   4   2  289.33    9.57
   4   4  -2  295.72    8.69
   4   4  -2  303.08    5.74
  -4   4   1  853.05   15.16
   4   4  -1  867.21   14.85
   4   4   0   90.03    5.63
  -4   4   0   81.60    5.22
  -4   4  -1 1870.94   19.70
   4   4   1 1912.04   22.50
  -4   4  -1 1914.11   19.59
  -4   4  -2  809.20   14.46
   4   4   2  835.95   15.37
  -4   4  -2  806.04   11.61
   4   4   3  675.26   14.22
  -4   4  -3  687.66    8.81
  -4   4  -3  694.81   14.74
  -4   4  -4 1602.96   23.66
   4   4   4 1547.21   21.56
  -4   4  -5  173.42    9.68
   4   4   5  176.44    8.21
  -4   4  -6  624.53   17.65
   4   4   6  647.80   15.04
  -4   4  -7 1273.59   26.31
   4   4   7 1267.88   21.20
   4   4   8  147.20    8.51
  -4   4  -8  149.97   11.46
  -4   4  -9 1297.82   30.43
   4   4   9 1272.44   22.80
  -4   4 -10  192.83   14.78
   4   4  10  202.67   10.68
  -4   4 -11   65.40   11.59
  -4   4 -12   81.11   14.03
  -4   4 -13  337.63   22.49
  -4   4 -14  237.84   20.88
  -4   4 -15  713.32   33.99
   4   5 -16  331.21   24.93
   4   5 -15   89.12   15.71
   4   5 -14  766.59   30.57
   4   5 -13  119.19   15.02
  -4   5  12  512.89   18.39
   4   5 -12  460.79   21.84
  -4   5  11  236.70   12.83
   4   5 -11  239.34   15.76
  -4   5  10   60.99    8.10
   4   5 -10   60.27   10.00
  -4   5   9  109.56    8.71
   4   5  -9  106.50   10.09
  -4   5   8  767.45   18.71
   4   5  -8  795.82   20.26
  -4   5   7  146.62    9.11
   4   5  -7  147.39    9.32
  -4   5   6 1765.45   26.03
   4   5  -6 1779.78   24.43
   4   5  -6 1693.28   11.66
   4   5  -5  762.55   11.00
  -4   5   5  752.08   16.67
   4   5  -5  749.07   14.57
   4   5  -4  534.85    7.27
   4   5  -4  545.43   10.49
  -4   5   4  547.20   13.85
   4   5  -4  553.42   11.01
  -4   5   3  409.88   11.67
   4   5  -3  462.88    8.52
   4   5  -3  442.49   10.13
  -4   5   2  736.66   14.89
   4   5  -2  794.19    8.08
   4   5  -2  770.79   13.69
  -4   5   1  352.43   10.17
   4   5  -1  319.34    9.49
   4   5   0 2114.91   23.79
  -4   5   0 2198.23   22.81
  -4   5  -1   69.99    5.49
   4   5   1   75.66    5.83
  -4   5  -1   67.14    4.52
  -4   5  -2 1000.40   17.30
  -4   5  -2  982.30   12.62
   4   5   2 1005.83   17.37
  -4   5  -3 2109.43   26.72
   4   5   3 2053.30   25.03
  -4   5  -3 2068.12   14.21
  -4   5  -4  559.41   15.29
   4   5   4  567.43   13.88
  -4   5  -5  200.37   10.70
   4   5   5  175.62    8.60
  -4   5  -6 2606.52   36.14
   4   5   6 2643.02   30.55
   4   5   7  517.74   14.54
  -4   5  -7  560.90   18.64
  -4   5  -8  764.05   22.89
   4   5   8  745.13   17.80
  -4   5  -9  274.46   16.12
   4   5   9  238.52   11.14
  -4   5 -10  993.49   29.48
   4   5  10 1028.75   22.24
  -4   5 -11  206.12   16.31
  -4   5 -12   93.19   15.07
  -4   5 -13  173.08   18.54
  -4   5 -14  326.94   24.34
  -4   5 -15   70.12   17.49
   4   6 -16  197.17   21.53
   4   6 -15   -0.58   13.09
   4   6 -14  -14.51   13.08
  -4   6  13  104.12   11.08
   4   6 -13  109.84   15.40
  -4   6  12 1107.61   26.72
   4   6 -12 1026.88   30.51
  -4   6  11   22.87    7.13
   4   6 -11   16.51    8.90
  -4   6  10  649.35   19.22
   4   6 -10  638.45   21.52
  -4   6   9   40.75    7.30
   4   6  -9   23.87    7.53
  -4   6   8  342.06   13.48
   4   6  -8  340.58   14.19
  -4   6   7   29.73    5.84
   4   6  -7   33.69    6.15
  -4   6   6  842.69   18.65
   4   6  -6  911.33   18.10
  -4   6   5   89.87    7.17
   4   6  -5   88.54    4.15
   4   6  -5   77.21    6.07
   4   6  -4 2621.50   22.18
  -4   6   4 2639.69   30.15
   4   6  -4 2767.52   23.94
   4   6  -3  673.62   12.39
  -4   6   3  698.58   15.44
   4   6  -3  691.48   10.42
   4   6  -2 5559.63   36.35
  -4   6   2 5587.00   40.55
  -4   6   1   71.35    5.44
   4   6  -1   75.58    5.56
  -4   6   0   62.10    4.86
   4   6   0   70.49    5.67
  -4   6  -1   51.64    4.19
   4   6   1   58.28    5.52
  -4   6  -2  115.90    7.73
  -4   6  -2  103.67    4.58
   4   6   2  114.04    6.85
  -4   6  -3   12.16    5.43
   4   6   3   24.20    4.77
  -4   6  -3   26.80    2.21
   4   6   4 5840.88   43.86
  -4   6  -4 5516.45   48.41
   4   6   5  311.02   11.19
  -4   6  -5  301.57   13.32
  -4   6  -6  929.96   23.05
   4   6   6  906.50   18.75
   4   6   7   57.92    6.69
  -4   6  -7   34.83    8.31
  -4   6  -8   15.23    8.04
   4   6   8   13.45    5.50
  -4   6  -9  138.49   13.25
   4   6   9  116.60    9.02
  -4   6 -10  483.48   22.12
   4   6  10  536.65   16.98
  -4   6 -11  139.26   14.91
   4   6  11  171.24   11.38
  -4   6 -12 1364.30   39.38
  -4   6 -13   80.48   16.00
  -4   6 -14  212.80   22.09
  -4   6 -15   10.01   15.79
   4   7 -16  177.18   21.23
   4   7 -15   -4.90   13.48
   4   7 -14 1054.14   35.66
  -4   7  13   68.72   10.11
   4   7 -13   60.28   13.15
  -4   7  12  379.78   16.85
   4   7 -12  430.93   21.28
  -4   7  11  727.78   21.84
   4   7 -11  777.03   25.54
  -4   7  10  121.93   10.24
   4   7 -10  124.96   11.83
  -4   7   9  224.55   11.99
   4   7  -9  222.36   13.15
   4   7  -8  571.31   17.76
  -4   7   8  507.72   16.37
  -4   7   7  151.14    9.36
   4   7  -7  126.96    9.11
  -4   7   6 2179.03   30.19
   4   7  -6 2206.89   27.79
  -4   7   5   63.54    6.52
   4   7  -5   72.90    6.17
   4   7  -5   61.67    3.69
  -4   7   4   75.04    6.58
   4   7  -4   69.49    4.30
   4   7  -4   73.20    5.44
   4   7  -3 1245.39   16.62
  -4   7   3 1256.22   20.93
   4   7  -2  203.19    7.75
  -4   7   2  193.42    8.52
   4   7  -1   62.53    5.22
  -4   7   1   57.37    5.53
   4   7   0 2253.48   25.62
  -4   7   0 2250.01   23.78
   4   7   1  125.13    7.18
  -4   7  -1  110.05    5.76
   4   7   2  720.54   15.52
  -4   7  -2  714.85   10.82
  -4   7  -3 1599.00   10.62
   4   7   3 1601.80   23.44
  -4   7  -3 1488.76   25.64
  -4   7  -4  213.99   11.63
   4   7   4  203.30    9.49
  -4   7  -5  701.32   20.11
   4   7   5  655.08   16.25
  -4   7  -6 1084.34   26.19
   4   7   6 1080.15   21.14
  -4   7  -7  234.16   14.33
   4   7   7  279.62   11.94
  -4   7  -8  826.66   25.60
   4   7   8  853.54   20.05
  -4   7  -9  151.33   14.57
   4   7   9  155.59   10.51
  -4   7 -10  493.66   22.96
   4   7  10  522.59   17.49
  -4   7 -11  109.88   15.25
   4   7  11   97.27    9.77
  -4   7 -12  133.79   17.05
  -4   7 -13  351.55   24.53
  -4   7 -14  342.47   25.91
  -4   7 -15   51.03   16.77
   4   8 -15  563.50   29.26
   4   8 -14   60.46   14.59
  -4   8  13  372.60   18.29
   4   8 -13  299.80   20.60
  -4   8  12   45.97    9.03
   4   8 -12   39.38   11.58
  -4   8  11  168.15   12.54
   4   8 -11  150.39   14.13
  -4   8  10  148.37   11.17
   4   8 -10  129.37   12.50
  -4   8   9 1004.81   23.95
   4   8  -9 1056.33   25.81
  -4   8   8  107.98    9.24
   4   8  -8   91.07    9.18
  -4   8   7  735.87   19.06
   4   8  -7  781.21   19.21
  -4   8   6  298.85   12.35
   4   8  -6  315.20   11.91
  -4   8   5 2177.33   30.10
   4   8  -5 2208.41   15.97
   4   8  -5 2236.79   25.81
  -4   8   4 1046.03   20.27
   4   8  -4 1075.04   14.19
  -4   8   3  221.80    9.71
   4   8  -3  210.19    7.45
   4   8  -2 2021.80   22.66
  -4   8   2 1951.18   25.28
   4   8  -1 1246.26   18.86
  -4   8   1 1232.57   19.18
   4   8   0  120.66    7.06
  -4   8   0  122.68    6.59
   4   8   1 1915.24   25.00
  -4   8  -1 2090.96   21.55
   4   8   2  309.31   10.98
  -4   8  -2  282.05    7.12
   4   8   3  756.85   16.89
  -4   8  -3  736.96    6.29
  -4   8  -4  358.21   15.14
   4   8   4  346.05   12.19
  -4   8  -5  159.99   11.48
   4   8   5  177.69    9.54
  -4   8  -6  142.05   11.69
   4   8   6  125.72    8.72
  -4   8  -7 1803.74   35.97
   4   8   7 1645.28   27.55
  -4   8  -8  129.02   13.04
   4   8   8  135.09    9.93
  -4   8  -9  529.48   23.08
   4   8   9  564.14   17.94
  -4   8 -10  291.76   19.77
   4   8  10  324.68   14.91
  -4   8 -11  140.42   15.91
   4   8  11  171.63   12.09
  -4   8 -12  419.17   25.31
  -4   8 -13  328.45   23.62
  -4   8 -14  183.37   22.47
  -4   8 -15  577.39   33.90
  -4   9  14   12.28    9.35
  -4   9  13  195.73   14.51
   4   9 -13  201.59   18.04
  -4   9  12   42.96    9.73
   4   9 -12   20.59   10.49
  -4   9  11 1281.65   29.87
   4   9 -11 1260.12   32.66
  -4   9  10   34.25    8.14
   4   9 -10   16.81    8.88
  -4   9   9  527.94   18.37
   4   9  -9  486.20   18.55
  -4   9   8  118.16    9.84
   4   9  -8  131.17   10.71
  -4   9   7   39.38    7.07
   4   9  -7   35.21    7.14
  -4   9   6   44.19    6.91
   4   9  -5 1813.90   13.28
  -4   9   5 1834.15   28.39
   4   9  -4   73.53    4.75
  -4   9   4   82.02    7.54
  -4   9   3 2902.01   32.99
   4   9  -3 2848.59   25.74
  -4   9   2   71.19    6.15
   4   9  -2   73.50    5.49
  -4   9   1  765.76   15.65
   4   9  -1  750.71   15.15
   4   9   0   20.20    4.45
  -4   9   0   13.17    4.10
   4   9   1   31.75    5.17
  -4   9  -1   41.60    4.24
   4   9   2  131.91    7.90
  -4   9  -2  111.54    4.91
   4   9   3 2322.43   29.69
   4   9   4  279.45   11.39
  -4   9  -5 1485.02   31.12
   4   9   5 1470.16   25.32
  -4   9  -6  206.11   14.15
   4   9   6  204.44   11.05
  -4   9  -7  601.90   22.89
   4   9   7  585.47   17.53
  -4   9  -8   49.35   11.60
   4   9   8   56.41    7.89
  -4   9  -9  454.00   22.45
   4   9   9  449.47   17.03
  -4   9 -10   25.61   11.67
   4   9  10   21.40    7.60
   4   9  11  916.72   24.94
  -4   9 -11  996.50   35.41
  -4   9 -12   20.48   14.64
   4   9  12   17.79    8.42
  -4   9 -13  849.73   35.74
  -4   9 -14   28.76   16.52
  -4  10  14   90.94   12.87
  -4  10  13  347.70   18.33
  -4  10  12   94.57   11.43
  -4  10  11   45.92    9.70
  -4  10  10  738.96   22.79
  -4  10   9  780.15   22.60
  -4  10   8  244.07   13.26
  -4  10   7  978.14   23.23
  -4  10   6   57.43    7.82
  -4  10   5 1053.54   22.28
  -4  10   4  331.31   12.80
   4  10  -4  310.82    8.14
   4  10  -3   49.61    4.82
  -4  10   3   43.89    6.30
   4  10  -3   41.60    2.73
  -4  10   2  443.90   13.09
   4  10  -2  421.50   11.39
  -4  10   1 1742.68   23.88
   4  10  -1 1668.07   22.93
  -4  10   0   41.92    5.03
   4  10   0   33.95    5.12
  -4  10  -1 1163.32   16.58
   4  10   1 1128.89   20.51
   4  10   2  432.18   13.53
  -4  10  -2  429.56    8.73
   4  10   3  944.46   20.08
   4  10   4  877.67   19.97
   4  10   5  197.79   10.81
  -4  10  -6  658.51   23.46
   4  10   6  677.82   18.82
  -4  10  -7  833.52   27.58
   4  10   7  784.06   20.68
  -4  10  -8   42.45   12.12
   4  10   8   17.07    6.83
  -4  10  -9  400.93   22.52
   4  10   9  333.03   15.35
   4  10  10  164.91   12.29
  -4  10 -10  120.66   16.54
  -4  10 -11  130.96   17.49
   4  10  11  125.45   11.87
  -4  10 -12  437.70   28.08
   4  10  12  434.41   19.33
  -4  10 -13  416.30   28.06
  -4  10 -14    5.75   16.47
  -4  11  15   20.51   11.10
  -4  11  14  466.94   22.14
  -4  11  13   27.23    9.86
  -4  11  12  190.47   14.93
  -4  11  11  357.52   17.69
  -4  11  10  161.61   13.18
  -4  11   9  149.97   12.00
  -4  11   8  927.58   24.03
  -4  11   7   27.23    6.80
  -4  11   6 1711.92   29.97
  -4  11   5   50.40    7.12
   4  11  -4  188.66    6.50
  -4  11   4  174.21   10.06
  -4  11   3  418.62   13.89
   4  11  -3  418.84   10.65
  -4  11   2  312.75   11.58
   4  11  -2  288.53    9.86
   4  11  -1  148.77    7.91
  -4  11   1  135.40    7.91
  -4  11   0 1664.71   22.40
   4  11   0 1538.21   23.66
  -4  11  -1  283.50    8.85
   4  11   1  308.01   11.69
  -4  11  -2 2403.70   19.82
   4  11   2 2418.58   31.64
   4  11   3  176.71   10.00
   4  11   4  316.89   13.10
   4  11   5  605.93   17.88
   4  11   6  154.09   10.26
   4  11   7   59.08    8.60
   4  11   8 2038.02   34.86
  -4  11  -8 2090.05   45.21
   4  11   9   91.79   10.68
  -4  11  -9   69.06   13.71
  -4  11 -10  230.97   20.15
   4  11  10  240.23   14.62
  -4  11 -11  245.47   21.50
   4  11  11  292.89   16.31
  -4  11 -12   20.67   15.31
   4  11  12   16.77    8.97
   4  11  13   96.42   12.44
  -4  11 -13  157.35   22.09
  -4  11 -14  345.70   28.18
  -4  12  14   28.29   10.63
  -4  12  13    3.33    9.48
  -4  12  12  167.28   14.92
  -4  12  11   63.76   10.57
  -4  12  10 1448.61   32.69
  -4  12   9   11.21    7.20
  -4  12   8    6.56    6.97
  -4  12   7   46.22    8.46
  -4  12   6  241.56   12.91
  -4  12   5   82.80    8.44
   4  12  -4 3066.67   22.84
   4  12  -4 3075.86   23.18
  -4  12   4 3130.50   38.23
   4  12  -3  220.79    8.24
  -4  12   3  227.38   10.95
  -4  12   2 1922.27   27.60
   4  12  -2 1985.05   24.54
   4  12  -2 1949.81   19.30
   4  12  -1  155.87    8.61
  -4  12   1  179.81    9.00
   4  12   0  909.95   18.85
  -4  12   0  845.90   16.51
   4  12   1    8.04    5.12
  -4  12  -1    1.56    3.55
  -4  12  -2  559.40    9.84
   4  12   2  533.05   15.94
   4  12   3   64.07    7.59
   4  12   4  699.09   19.14
   4  12   5   80.01    8.63
   4  12   6  559.86   18.34
   4  12   7   44.50    8.07
   4  12   8  100.02   10.02
   4  12   9   55.30    9.57
   4  12  10  886.43   25.96
  -4  12 -11   31.37   14.11
   4  12  11   22.08    8.67
  -4  12 -12 1020.18   40.32
   4  12  12 1039.36   30.06
   4  12  13   34.37   10.70
  -4  13  14  297.26   20.01
  -4  13  13  161.70   15.48
  -4  13  12  172.44   15.01
  -4  13  11  105.31   12.63
  -4  13  10    0.53    8.68
  -4  13   9  275.05   15.58
  -4  13   8  803.30   23.73
  -4  13   7   44.82    8.48
  -4  13   6  500.12   17.87
  -4  13   5 1025.91   24.00
   4  13  -4  219.89    6.54
  -4  13   4  215.85   11.62
   4  13  -3  155.99    7.19
  -4  13   3  188.29   10.48
   4  13  -3  166.87    7.52
  -4  13   2  672.45   17.24
   4  13  -2  682.43   10.81
   4  13  -2  679.48   14.95
  -4  13   1 1292.52   22.00
   4  13  -1 1333.24   22.07
   4  13   0 1375.27   23.45
  -4  13   0 1354.61   20.99
   4  13   1  175.39    9.86
  -4  13  -1  169.58    7.47
   4  13   2 1363.10   25.37
  -4  13  -2 1359.57   14.75
   4  13   3  209.29   11.42
   4  13   4    7.57    5.89
   4  13   5  361.66   15.42
   4  13   6  251.60   13.81
   4  13   7  155.26   12.11
   4  13   8 1270.19   29.88
   4  13   9  123.53   11.77
   4  13  10  292.21   16.69
   4  13  11  667.09   24.65
   4  13  12   20.13    9.54
   4  13  13   75.83   12.51
  -4  14  13  403.36   21.79
  -4  14  12  139.06   14.69
  -4  14  11   10.92    9.64
  -4  14  10  104.35   12.00
  -4  14   9  187.23   13.97
  -4  14   8  102.63   11.25
  -4  14   7 2119.41   37.16
  -4  14   6   96.40   10.32
  -4  14   5  111.65   10.08
  -4  14   4  486.01   16.74
   4  14  -3  134.15    6.75
  -4  14   3  136.47    9.65
   4  14  -3  144.64    7.13
  -4  14   2  210.73   10.66
   4  14  -2  196.03    8.87
   4  14  -2  196.71    8.72
   4  14  -2  190.87    5.31
   4  14  -1 1804.66   26.01
  -4  14   1 1801.17   26.41
   4  14  -1 1867.96   22.21
   4  14   0  400.07   13.63
  -4  14   0  397.63   12.17
  -4  14  -1 1182.47   17.74
   4  14   1 1193.86   23.45
   4  14   2   98.11    8.65
   4  14   3  427.69   16.01
   4  14   4   73.16    8.70
   4  14   5   72.33    8.67
   4  14   6   71.15    9.18
   4  14   7  703.81   22.57
   4  14   8  101.09   10.99
   4  14   9  827.79   25.97
   4  14  10  301.83   17.57
   4  14  11  105.45   13.17
   4  14  12  144.94   14.92
   4  14  13  239.22   17.91
   4  14  13  244.11   18.26
  -4  15  12   20.23   11.01
  -4  15  11  458.62   21.65
  -4  15  10   51.36   10.77
  -4  15   9  656.84   23.66
  -4  15   8   15.26    8.88
  -4  15   7   41.93    9.28
  -4  15   6  165.21   12.29
  -4  15   5  947.44   24.34
  -4  15   4   35.98    7.42
   4  15  -3 1777.04   21.20
  -4  15   3 1646.66   28.85
   4  15  -2  116.46    7.57
   4  15  -2  122.49    7.61
  -4  15   2  103.90    8.62
   4  15  -1 1284.72   17.88
   4  15  -1 1286.32   21.91
   4  15  -1 1288.94   22.62
  -4  15   1 1267.82   22.75
   4  15   0   45.38    6.70
  -4  15   0   36.94    5.84
   4  15   0   27.92    5.40
  -4  15  -1   51.77    5.14
   4  15   1   59.07    7.51
   4  15   2   74.37    8.56
   4  15   3  663.92   19.88
   4  15   4  103.78   10.07
   4  15   5  946.88   24.93
   4  15   6  170.59   12.56
   4  15   7   36.51    9.15
   4  15   8   72.52   11.04
   4  15   9  188.78   14.43
   4  15  10   72.32   11.14
   4  15  11 1169.92   33.11
   4  15  12   58.63   11.83
   4  15  12   67.91   13.30
   4  15  13  364.57   21.29
   4  15  13  373.64   21.24
  -4  16  12  195.95   17.36
  -4  16  11   -7.97   10.20
  -4  16  10  302.42   18.34
  -4  16   9  129.95   12.78
  -4  16   8   36.94    9.79
  -4  16   7  968.41   27.10
  -4  16   6  139.13   12.19
  -4  16   5  370.36   16.54
  -4  16   4  421.75   16.54
  -4  16   3   62.80    8.29
   4  16  -2  381.65   12.02
  -4  16   2  421.56   14.71
   4  16  -1  303.97   12.08
   4  16  -1  313.64   12.05
  -4  16   1  333.55   12.64
   4  16  -1  310.48    8.61
   4  16   0   50.34    6.89
  -4  16   0   78.23    7.42
   4  16   0   73.22    8.01
   4  16   0   51.11    6.41
   4  16   1 1704.44   29.24
  -4  16  -1 1677.91   20.89
   4  16   2  194.62   11.76
   4  16   3  279.55   14.21
   4  16   4  532.39   18.95
   4  16   5   97.17   10.96
   4  16   6  246.03   14.72
   4  16   7  405.18   18.87
   4  16   8  129.21   12.68
   4  16   9  785.21   26.58
   4  16  10  232.35   16.41
   4  16  11   10.41   10.47
   4  16  11   13.73   11.17
   4  16  12  199.92   16.96
   4  16  12  200.83   17.41
  -4  17  11   78.58   13.39
  -4  17  10   72.10   12.20
  -4  17   9  314.18   18.57
  -4  17   8  881.27   27.52
  -4  17   7   74.74   11.28
  -4  17   6  930.33   26.14
  -4  17   5   30.46    8.60
  -4  17   4  127.75   11.25
  -4  17   3  105.85    9.63
   4  17  -2  224.85    9.83
  -4  17   2  218.14   11.40
   4  17  -1   42.84    6.61
  -4  17   1   53.05    7.02
   4  17  -1   45.07    4.16
   4  17   0 1086.49   22.61
   4  17   0 1009.98   22.05
   4  17   0 1033.56   18.34
  -4  17   0 1127.08   20.52
   4  17   1  139.47   10.02
   4  17   1  117.43    9.67
   4  17   2  457.14   16.74
   4  17   2  459.94   17.24
   4  17   3  344.13   15.73
   4  17   4  169.87   12.62
   4  17   5  371.27   17.47
   4  17   6  678.40   23.26
   4  17   7  123.54   12.39
   4  17   8  449.19   20.88
   4  17   9   38.62   10.48
   4  17   9   49.88   11.83
   4  17  10  394.30   20.62
   4  17  10  367.04   20.93
   4  17  11  101.35   14.17
   4  17  11  110.10   14.27
  -4  18  10  191.71   16.48
  -4  18   9   32.89   10.49
  -4  18   8  455.74   21.31
  -4  18   7   60.38   11.24
  -4  18   6  403.55   18.59
  -4  18   5   86.71   10.62
  -4  18   4  808.83   23.29
  -4  18   3  128.90   10.16
  -4  18   2 1103.60   23.82
   4  18  -1   12.15    5.89
  -4  18   1   21.39    6.45
   4  18   0   63.41    8.14
  -4  18   0   46.45    6.41
   4  18   0   60.82    5.99
   4  18   1   32.77    7.92
   4  18   1   40.58    7.96
   4  18   1   32.06    7.08
   4  18   2  406.52   16.40
   4  18   2  475.82   17.83
   4  18   3  115.77   11.02
   4  18   3  118.73   10.89
   4  18   4  963.42   25.67
   4  18   4 1013.30   26.94
   4  18   5   47.91    9.70
   4  18   5   56.15    9.87
   4  18   6  561.87   22.33
   4  18   6  564.53   21.55
   4  18   7   61.38   10.63
   4  18   7   54.20   10.91
   4  18   8   -3.89    9.32
   4  18   8   -5.90    9.21
   4  18   9   -4.93    9.73
   4  18   9   21.32   10.17
   4  18  10  535.48   24.56
   4  18  10  531.89   23.95
  -4  19   9   75.16   13.18
  -4  19   8  445.92   21.29
  -4  19   7   23.48    9.79
  -4  19   6  553.38   21.74
  -4  19   5  192.14   14.06
  -4  19   4  194.58   13.31
  -4  19   3 1255.16   27.35
  -4  19   2   91.74    9.58
   4  19  -1  102.51    8.82
  -4  19   1   86.75    8.30
   4  19   0  901.20   21.46
   4  19   0  856.75   14.12
   4  19   1  167.29   11.54
   4  19   1  167.34    9.47
   4  19   2  205.48   12.77
   4  19   2  223.73   13.11
   4  19   3  145.99   11.94
   4  19   3  129.61   11.90
   4  19   4   31.36    8.81
   4  19   4   25.56    9.03
   4  19   5  111.51   12.33
   4  19   5  129.53   12.78
   4  19   6  615.24   23.72
   4  19   6  624.39   23.59
   4  19   7   21.93   10.11
   4  19   7   17.57    9.70
   4  19   8  431.70   21.30
   4  19   8  397.80   21.07
   4  19   9  239.60   17.38
   4  19   9  235.77   17.74
  -4  20   8   31.14   10.99
  -4  20   7  263.47   17.01
  -4  20   6   72.38   11.13
  -4  20   5  630.16   22.75
  -4  20   4  128.62   11.88
  -4  20   3  269.96   14.56
  -4  20   2   86.25    9.27
   4  20   0    7.83    6.76
   4  20   1 1389.62   28.36
   4  20   1 1307.63   20.59
   4  20   2  162.67   12.58
   4  20   3  133.28   11.92
   4  20   4  240.60   15.36
   4  20   4  239.88   15.36
   4  20   5   42.17   10.52
   4  20   5    7.19    8.71
   4  20   6  134.24   13.63
   4  20   6  126.15   13.30
   4  20   7  619.75   24.44
   4  20   7  561.66   23.43
   4  20   8  112.11   14.04
   4  20   8  155.05   14.80
  -4  21   7   10.99   10.11
  -4  21   6    6.36    9.20
  -4  21   5  268.37   16.37
  -4  21   4   83.28   10.77
  -4  21   3 1189.82   27.19
  -4  21   2   70.63    9.23
   4  21   0   30.92    7.42
   4  21   1    7.95    7.28
   4  21   1    6.51    5.69
   4  21   2    1.87    8.07
   4  21   3  575.28   21.26
   4  21   4  152.63   13.48
   4  21   5  735.13   25.30
   4  21   6  132.85   14.07
   4  21   7  132.55   14.63
  -4  22   6   31.83   11.10
  -4  22   5  247.26   15.98
  -4  22   4  250.63   15.15
  -4  22   3    4.73    8.15
   4  22   1  411.22   16.81
   4  22   2  132.39   12.03
   4  22   2  146.19    9.21
   4  22   3  134.35   12.91
   4  22   4  289.95   17.14
   4  22   5   72.92   12.25
   4  22   6  169.15   15.27
  -4  23   5   52.05   10.80
  -4  23   4  196.55   14.40
   4  23   2  440.65   18.48
   4  23   3  150.46   13.69
   4  23   4   11.76   10.24
   4  23   5  113.15   13.46
   4  24   3   36.48    9.56
   5 -24   1  585.36   27.06
  -5 -23   3  649.66   27.18
  -5 -23   2   57.82   12.52
   5 -23  -2   72.47   14.55
  -5 -23   1   88.43   14.20
   5 -23  -1  100.62   15.09
  -5 -23   0  188.59   17.45
   5 -23   0  163.44   16.55
  -5 -23  -1   44.66   12.98
   5 -23   1   50.68   12.60
  -5 -23  -2   44.48   13.07
   5 -22  -5   44.56   13.68
   5 -22  -4  321.83   21.54
  -5 -22   3   42.92   11.25
   5 -22  -3   24.99   11.78
  -5 -22   2  317.24   19.83
   5 -22  -2  301.05   20.20
  -5 -22   1  606.12   25.82
   5 -22  -1  572.23   25.72
  -5 -22   0   79.24   13.43
   5 -22   0   91.44   13.44
  -5 -22  -1  120.83   14.84
   5 -22   1  124.82   14.80
  -5 -22  -2  406.83   22.32
  -5 -22  -3   66.75   12.99
  -5 -22  -4  254.25   19.34
   5 -21  -6  502.06   24.85
   5 -21  -5   66.87   13.24
  -5 -21   4   19.13   10.50
   5 -21  -4    2.36   10.43
  -5 -21   3    5.21    9.93
   5 -21  -3   24.84   11.23
  -5 -21   2  272.08   18.02
   5 -21  -2  246.33   18.00
  -5 -21   1  109.46   13.75
   5 -21  -1  101.76   13.25
  -5 -21   0 1067.40   32.52
   5 -21   0 1084.07   32.19
  -5 -21  -1   76.08   12.43
   5 -21   1   91.25   12.97
  -5 -21  -2  130.12   14.35
  -5 -21  -3    0.61   10.77
  -5 -21  -4   13.10   10.73
  -5 -21  -5   51.43   12.88
  -5 -21  -6  463.72   23.66
   5 -20  -8   -6.53   15.57
   5 -20  -8   -3.29   11.32
   5 -20  -7  234.46   18.77
   5 -20  -6  132.14   15.50
   5 -20  -5  145.04   15.24
   5 -20  -4  656.69   27.17
  -5 -20   4  685.37   24.98
   5 -20  -3   58.72   11.75
  -5 -20   3   66.44   11.38
   5 -20  -2  277.47   18.01
  -5 -20   2  250.53   16.99
  -5 -20   1   70.37   11.97
   5 -20  -1   21.26   10.13
  -5 -20   0   62.08   12.18
   5 -20   0   62.33   11.47
  -5 -20  -1  127.26   14.39
   5 -20   1  131.39   13.59
  -5 -20  -2  619.58   24.80
   5 -20   2  633.93   23.99
  -5 -20  -3   71.66   12.22
  -5 -20  -4  548.49   24.03
  -5 -20  -5  136.68   15.70
  -5 -20  -6  431.79   22.28
  -5 -20  -7   64.56   13.66
  -5 -20  -8   79.05   12.95
   5 -19  -9   88.21   18.84
   5 -19  -9  101.52   14.66
   5 -19  -8  159.52   16.25
   5 -19  -8  166.13   20.07
   5 -19  -7   19.72   11.11
   5 -19  -6  282.74   18.64
   5 -19  -5  708.78   27.10
  -5 -19   4  131.95   12.81
   5 -19  -4  121.12   13.86
   5 -19  -3  371.70   20.08
  -5 -19   3  312.54   17.76
   5 -19  -2  158.34   14.34
  -5 -19   2  166.11   14.20
  -5 -19   1   71.66   11.36
   5 -19  -1   94.70   12.02
  -5 -19   0  456.36   20.49
   5 -19   0  394.89   19.30
  -5 -19  -1  199.54   15.11
   5 -19   1  194.82   14.42
  -5 -19  -2  188.31   15.16
   5 -19   2  146.80   13.11
  -5 -19  -3  655.64   24.84
  -5 -19  -4   60.33   11.27
  -5 -19  -5  282.11   18.12
  -5 -19  -6  113.44   13.51
  -5 -19  -7   80.04   13.16
  -5 -19  -8  436.67   21.87
  -5 -19  -9  258.99   17.92
   5 -18 -10   65.11   12.51
   5 -18  -9  270.45   18.92
   5 -18  -9  273.55   23.43
   5 -18  -8   41.36   14.74
   5 -18  -8   46.24   12.12
   5 -18  -7  753.26   27.46
   5 -18  -6   49.23   11.58
  -5 -18   5   31.10    8.57
   5 -18  -5   18.70   10.28
  -5 -18   4    8.79    7.70
   5 -18  -4   12.62    9.60
   5 -18  -3   74.89   12.05
  -5 -18   3   76.10   11.00
   5 -18  -2  135.01   13.04
  -5 -18   2  127.47   12.21
   5 -18  -1 1495.55   34.00
  -5 -18   1 1550.14   34.53
  -5 -18   0   58.80   10.71
   5 -18   0   57.25   10.51
  -5 -18  -1  604.64   22.70
   5 -18   1  588.95   21.78
  -5 -18  -2  172.56   13.93
   5 -18   2  174.30   13.38
  -5 -18  -3  199.00   15.14
  -5 -18  -4   23.22    9.38
  -5 -18  -5  495.87   22.38
  -5 -18  -6  232.98   16.62
  -5 -18  -7  714.85   26.07
  -5 -18  -8   28.50   11.92
  -5 -18  -9  276.97   17.71
  -5 -18  -9  263.15   19.78
  -5 -18 -10   46.86   11.79
   5 -17 -11  512.77   23.20
   5 -17 -10   31.77   16.15
   5 -17 -10   55.60   12.05
   5 -17  -9  201.41   21.16
   5 -17  -9  233.54   17.32
   5 -17  -8  124.29   18.06
   5 -17  -8   67.90   12.09
   5 -17  -7   38.75   10.57
   5 -17  -6  236.44   16.70
   5 -17  -5  840.85   27.34
  -5 -17   5  869.83   25.18
   5 -17  -4  133.67   13.48
  -5 -17   4  135.32   11.75
   5 -17  -3  801.54   25.86
  -5 -17   3  732.62   23.26
   5 -17  -2  165.25   13.84
  -5 -17   2  181.53   13.19
   5 -17  -1  157.45   13.06
  -5 -17   1  183.73   13.56
  -5 -17   0   35.58    9.38
   5 -17   0   25.63    8.14
  -5 -17  -1  386.78   18.03
   5 -17   1  389.71   17.45
  -5 -17  -2  390.53   18.62
   5 -17   2  401.25   17.48
  -5 -17  -3 1166.63   30.47
   5 -17   3 1165.09   27.84
  -5 -17  -4  466.02   20.52
  -5 -17  -5  597.79   23.34
  -5 -17  -6   20.04    8.95
  -5 -17  -7   25.85   10.22
  -5 -17  -8  287.13   17.39
  -5 -17  -9  306.23   17.61
  -5 -17  -9  258.59   19.97
  -5 -17 -10   47.54   14.11
  -5 -17 -10   96.30   12.20
   5 -16 -11   15.75   10.16
   5 -16 -11   -0.09   15.48
   5 -16 -10  423.92   21.04
   5 -16 -10  380.05   26.00
   5 -16  -9  105.81   17.41
   5 -16  -9  115.22   13.47
   5 -16  -8    2.96   12.78
   5 -16  -8   -3.73    9.74
   5 -16  -7  149.26   14.14
   5 -16  -6  191.68   15.02
   5 -16  -5   54.95   10.18
  -5 -16   5   54.99    8.79
   5 -16  -4 1025.28   28.75
  -5 -16   4 1085.13   26.85
   5 -16  -3  293.07   16.09
  -5 -16   3  323.18   16.01
   5 -16  -2  476.61   19.55
  -5 -16   2  482.89   18.64
   5 -16  -1  607.90   21.34
  -5 -16   1  532.40   19.78
  -5 -16   0   21.76    8.28
   5 -16   0    6.26    7.19
  -5 -16  -1  366.07   16.94
   5 -16   1  330.95   15.53
   5 -16   2  233.86   13.58
  -5 -16  -2  218.71   14.07
  -5 -16  -3   80.50   10.63
   5 -16   3   81.64    9.52
  -5 -16  -4 1372.42   31.75
  -5 -16  -5  112.11   12.02
  -5 -16  -6   78.27   10.70
  -5 -16  -7  230.95   15.18
  -5 -16  -8   71.97   10.63
  -5 -16  -9  282.46   16.31
  -5 -16  -9  308.61   20.19
  -5 -16 -10  417.71   18.65
  -5 -16 -10  480.65   25.14
  -5 -16 -11  107.86   16.65
   5 -15 -11   11.43    9.53
   5 -15 -11   -3.85   15.32
   5 -15 -10  116.60   18.20
   5 -15 -10  115.81   13.23
   5 -15  -9   18.84    9.30
   5 -15  -9    2.68   13.15
   5 -15  -8  670.05   24.18
   5 -15  -8  695.65   29.11
   5 -15  -7  181.98   14.46
   5 -15  -6  650.63   23.38
  -5 -15   5   25.22    7.71
   5 -15  -5   16.97    8.75
   5 -15  -4   44.79    9.42
  -5 -15   4   60.14    9.30
   5 -15  -3  340.32   17.10
  -5 -15   3  321.00   15.24
   5 -15  -2  899.06   25.11
  -5 -15   2  872.29   23.68
   5 -15  -1  102.25   10.51
  -5 -15   1   96.34   10.19
   5 -15   0  921.88   24.16
  -5 -15   0  931.77   24.57
   5 -15   1  227.23   13.19
  -5 -15  -1  225.23   13.38
  -5 -15  -2  847.65   24.19
   5 -15   2  877.17   23.02
  -5 -15  -3   75.19    9.81
   5 -15   3   58.67    8.20
  -5 -15  -4  170.85   12.88
  -5 -15  -5   38.92    8.82
  -5 -15  -6  732.83   23.61
  -5 -15  -7   62.16   10.11
  -5 -15  -8 1070.63   27.90
  -5 -15  -9  103.81   10.91
  -5 -15  -9   92.98   14.34
  -5 -15 -10  200.17   13.40
  -5 -15 -10  176.16   17.52
  -5 -15 -11  -18.77   12.69
   5 -14 -12  919.65   37.91
   5 -14 -11   15.52   14.74
   5 -14 -11   62.52   10.54
   5 -14 -10  257.70   21.61
   5 -14 -10  264.25   16.25
   5 -14  -9  219.31   19.51
   5 -14  -9  246.74   15.87
   5 -14  -8  257.99   15.91
   5 -14  -8  247.70   19.88
   5 -14  -7  223.27   15.01
   5 -14  -6  591.16   21.77
  -5 -14   6  580.38   19.03
   5 -14  -5   50.57    9.44
  -5 -14   5   30.95    7.46
   5 -14  -4  880.47   24.96
  -5 -14   4  934.89   23.50
  -5 -14   3   64.79    8.36
   5 -14  -3   50.64    8.96
   5 -14  -2  367.79   16.49
  -5 -14   2  364.59   15.49
   5 -14  -1  425.75   16.86
  -5 -14   1  433.18   16.92
   5 -14   0   69.43    9.03
  -5 -14   0   75.96    9.17
   5 -14   1  118.98   10.02
  -5 -14  -1  114.40   10.18
   5 -14   2 1138.18   25.06
  -5 -14  -2 1181.07   27.10
  -5 -14  -3  252.91   13.80
   5 -14   3  260.58   12.94
  -5 -14  -4 2013.39   35.72
  -5 -14  -5  125.73   11.05
  -5 -14  -6  234.54   14.12
  -5 -14  -7  336.90   16.23
  -5 -14  -8   14.94    9.15
  -5 -14  -8    8.27    8.05
  -5 -14  -9   10.27   10.11
  -5 -14  -9   14.60    7.86
  -5 -14 -10  701.17   27.54
  -5 -14 -11  143.52   17.32
  -5 -14 -12  251.33   21.01
   5 -13 -12   45.27   16.26
   5 -13 -11  800.88   33.46
   5 -13 -11  801.06   24.43
   5 -13 -10   73.96   15.20
   5 -13 -10   75.67   11.02
   5 -13  -9  292.62   20.90
   5 -13  -9  339.41   17.51
   5 -13  -8  534.01   20.63
   5 -13  -8  537.45   24.69
   5 -13  -7   31.41    8.80
   5 -13  -6  233.69   14.41
  -5 -13   6  229.91   12.27
   5 -13  -5  660.66   21.61
  -5 -13   5  641.27   19.00
   5 -13  -4   44.98    8.12
  -5 -13   4   52.62    7.66
  -5 -13   3  398.15   15.27
   5 -13  -3  396.92   16.87
   5 -13  -2  333.88   15.25
  -5 -13   2  315.12   14.23
   5 -13  -1   85.35    9.03
  -5 -13   1   76.71    8.91
   5 -13   0  567.89   18.36
  -5 -13   0  629.90   19.22
   5 -13   1  380.18   14.93
  -5 -13  -1  393.09   15.79
   5 -13   2  328.58   13.99
  -5 -13  -2  306.64   14.40
  -5 -13  -3 1782.18   32.17
   5 -13   3 1827.86   29.56
  -5 -13  -4  194.20   12.37
   5 -13   4  153.54   10.05
  -5 -13  -5  737.13   21.67
  -5 -13  -6  534.58   18.97
  -5 -13  -7   89.37    9.73
  -5 -13  -8   74.53   11.11
  -5 -13  -8   76.62    9.47
  -5 -13  -9  240.87   13.54
  -5 -13  -9  290.52   17.90
  -5 -13 -10  198.51   16.87
  -5 -13 -11  270.36   20.16
  -5 -13 -12   93.10   14.86
   5 -12 -13  274.35   23.67
   5 -12 -12   65.29   16.34
   5 -12 -11    8.65    7.90
   5 -12 -11   18.98   13.49
   5 -12 -10   24.30    8.91
   5 -12 -10    9.17   12.12
   5 -12  -9  745.91   29.23
   5 -12  -9  787.39   24.00
   5 -12  -8  125.37   11.94
   5 -12  -8  110.17   14.32
   5 -12  -7  664.21   21.83
  -5 -12   6   49.55    7.54
   5 -12  -6   59.15    9.66
   5 -12  -5  446.29   17.65
  -5 -12   5  406.30   15.24
   5 -12  -4   42.72    7.97
  -5 -12   4   53.67    7.61
   5 -12  -3 1051.53   24.98
  -5 -12   3 1057.44   23.33
   5 -12  -2  170.78   11.34
  -5 -12   2  133.13    9.67
   5 -12  -1 1286.32   26.71
  -5 -12   1 1323.07   26.09
  -5 -12   0  239.05   12.26
   5 -12   0  272.19   12.84
  -5 -12  -1 2963.90   39.39
   5 -12   1 3065.81   38.53
  -5 -12  -2   83.26    8.88
   5 -12   2   91.65    8.22
  -5 -12  -3  158.48   10.83
   5 -12   3  149.76    9.64
  -5 -12  -4  119.29    9.97
   5 -12   4   98.70    8.08
  -5 -12  -5  324.01   14.61
  -5 -12  -6   21.04    7.24
  -5 -12  -7 1221.74   26.13
  -5 -12  -8  292.71   13.91
  -5 -12  -8  268.07   16.29
  -5 -12  -9  616.10   18.80
  -5 -12  -9  577.72   23.46
  -5 -12 -10   69.85   13.31
  -5 -12 -11   19.51   11.29
  -5 -12 -12   17.43   12.83
  -5 -12 -13  372.16   24.68
   5 -11 -13  169.89   20.92
   5 -11 -12  141.63   18.42
   5 -11 -11  915.73   33.85
   5 -11 -11  911.93   23.84
   5 -11 -10   56.45    9.41
   5 -11 -10   58.67   13.74
   5 -11  -9  307.66   20.52
   5 -11  -9  363.41   16.75
   5 -11  -8   52.75   11.73
   5 -11  -8   67.43    9.61
   5 -11  -7  169.89   11.77
  -5 -11   7  167.07   10.69
   5 -11  -6  119.26   10.71
  -5 -11   6  126.68    9.42
   5 -11  -5  866.23   23.14
  -5 -11   5  918.66   21.31
   5 -11  -4  103.06    9.77
  -5 -11   4  114.13    8.90
   5 -11  -3 1185.29   25.76
  -5 -11   3 1277.41   24.81
   5 -11  -2  183.78   11.27
  -5 -11   2  180.93   10.67
   5 -11  -1   82.90    8.34
  -5 -11   1   73.16    7.83
   5 -11   0 1290.81   25.32
  -5 -11   0 1321.82   25.50
   5 -11   1  504.39   15.96
  -5 -11  -1  478.90   16.09
   5 -11   2   87.27    8.01
  -5 -11  -2   77.96    8.21
   5 -11   3 1051.93   21.61
  -5 -11  -3 1062.94   23.63
  -5 -11  -4  128.40    9.88
   5 -11   4  141.21    9.16
  -5 -11  -5 1247.28   25.66
  -5 -11  -6  372.48   14.75
  -5 -11  -7  103.26    9.38
  -5 -11  -8  138.49   10.13
  -5 -11  -8  159.76   13.71
  -5 -11  -9  398.64   14.81
  -5 -11  -9  414.87   19.95
  -5 -11 -10  111.66   13.64
  -5 -11 -11 1036.93   33.16
  -5 -11 -12  155.72   17.04
  -5 -11 -13  283.57   21.56
   5 -10 -14   41.13   16.41
   5 -10 -13  206.88   21.20
   5 -10 -12  739.52   32.22
   5 -10 -11  229.16   19.42
   5 -10 -11  191.20   12.01
   5 -10 -10  645.87   27.56
   5 -10 -10  633.79   20.02
   5 -10  -9  100.22   14.66
   5 -10  -9  115.37   10.66
   5 -10  -8   65.06   12.40
   5 -10  -8  115.84   10.79
  -5 -10   7  684.80   18.36
   5 -10  -7  690.16   21.04
   5 -10  -6  772.93   21.70
  -5 -10   6  760.60   19.15
   5 -10  -5  219.07   12.53
  -5 -10   5  220.87   11.00
  -5 -10   4  824.82   19.68
   5 -10  -4  790.39   20.97
   5 -10  -3  301.39   13.73
  -5 -10   3  292.91   12.26
   5 -10  -2  819.70   20.59
  -5 -10   2  897.04   20.24
   5 -10  -1  288.07   12.64
  -5 -10   1  334.94   13.11
   5 -10   0  191.23   10.62
  -5 -10   0  192.38   10.36
   5 -10   1 1294.94   24.24
  -5 -10  -1 1257.96   24.43
   5 -10   2 1199.43   22.81
  -5 -10  -2 1216.26   24.02
   5 -10   3   38.03    6.03
  -5 -10  -3   36.73    6.69
  -5 -10  -4  931.54   21.34
   5 -10   4  998.43   20.20
  -5 -10  -5  125.35    9.32
  -5 -10  -6  870.53   20.79
  -5 -10  -7  411.10   14.71
  -5 -10  -7  512.34   18.47
  -5 -10  -8  199.47   10.92
  -5 -10  -8  197.73   14.12
  -5 -10  -9  243.22   11.35
  -5 -10  -9  255.20   16.07
  -5 -10 -10  440.01   21.46
  -5 -10 -11  129.28   15.41
  -5 -10 -12  501.06   25.36
  -5 -10 -13  194.53   18.89
  -5 -10 -14   -5.58   13.25
   5  -9 -14  445.89   28.21
   5  -9 -13   34.96   14.29
   5  -9 -12  246.17   20.90
   5  -9 -11    2.34    6.43
   5  -9 -11    4.27   11.75
   5  -9 -10  253.58   18.91
   5  -9 -10  258.88   13.06
   5  -9  -9   74.68   13.03
   5  -9  -9   70.71    8.76
   5  -9  -8 1468.97   29.01
   5  -9  -8 1423.68   34.43
  -5  -9   7  129.44    9.09
   5  -9  -7  127.42   10.36
  -5  -9   6  364.78   13.44
   5  -9  -6  329.18   14.46
   5  -9  -5  338.77   14.39
  -5  -9   5  334.03   12.81
   5  -9  -4   55.07    7.71
  -5  -9   4   59.06    7.05
  -5  -9   3   42.14    6.45
   5  -9  -3   26.56    6.34
   5  -9  -2 1788.47   29.17
  -5  -9   2 1888.58   28.30
   5  -9  -1  454.66   14.97
  -5  -9   1  432.45   14.19
   5  -9   0 3681.25   39.73
  -5  -9   0 3685.41   39.14
   5  -9   1   67.45    7.17
  -5  -9  -1   56.59    6.65
   5  -9   2  487.57   14.50
  -5  -9  -2  530.62   15.74
   5  -9   3   84.65    7.07
  -5  -9  -3   88.62    8.12
  -5  -9  -4   16.09    5.83
   5  -9   4   10.43    4.57
  -5  -9  -5   37.66    6.64
   5  -9   5   40.06    5.69
  -5  -9  -6 2011.54   29.59
  -5  -9  -7  480.67   15.01
  -5  -9  -7  560.52   18.87
  -5  -9  -8  861.76   19.11
  -5  -9  -8  810.06   23.94
  -5  -9  -9   45.02    6.53
  -5  -9  -9   58.34   10.06
  -5  -9 -10  155.72   14.67
  -5  -9 -11  125.88   14.47
  -5  -9 -12   94.68   14.60
  -5  -9 -13   54.22   14.64
  -5  -9 -14  731.10   32.13
   5  -8 -14  147.76   18.97
   5  -8 -13  123.03   17.27
   5  -8 -12  600.91   27.84
   5  -8 -11   50.87   13.65
   5  -8 -10  590.24   24.80
   5  -8 -10  617.44   18.21
   5  -8  -9  281.94   17.97
   5  -8  -9  248.64   12.41
   5  -8  -8   19.49    6.53
  -5  -8   8   22.58    6.08
   5  -8  -8    6.57    9.42
   5  -8  -7  310.30   16.58
  -5  -8   7  304.17   12.49
   5  -8  -7  293.38   13.61
  -5  -8   6  460.11   14.66
   5  -8  -6  424.43   15.81
   5  -8  -5  348.80   14.14
  -5  -8   5  380.73   13.37
   5  -8  -4 2577.61   35.37
  -5  -8   4 2504.76   31.77
   5  -8  -3   56.47    7.34
  -5  -8   3   66.69    6.75
   5  -8  -3   69.13    7.51
   5  -8  -2  531.36   15.99
  -5  -8   2  612.44   16.15
   5  -8  -1  413.28   14.04
  -5  -8   1  433.16   13.76
  -5  -8   0  147.53    8.84
   5  -8   0  159.96    9.31
  -5  -8  -1  552.19   15.44
   5  -8   1  573.68   15.68
   5  -8   2 1794.59   26.33
  -5  -8  -2 1885.99   28.01
   5  -8   3  137.40    8.19
  -5  -8  -3  145.36    9.04
   5  -8   4 1042.11   19.51
  -5  -8  -4  922.18   19.80
  -5  -8  -5  159.55    9.23
  -5  -8  -5  156.19    7.53
   5  -8   5  183.00    9.08
  -5  -8  -6  472.55   14.36
  -5  -8  -6  478.11   13.37
  -5  -8  -6  528.33   16.81
  -5  -8  -7   95.44    7.62
  -5  -8  -7  103.01    8.37
  -5  -8  -7   91.23    9.50
  -5  -8  -8  349.31   12.04
  -5  -8  -8  347.60   14.17
  -5  -8  -8  328.52   15.95
  -5  -8  -9  461.81   12.58
  -5  -8  -9  457.66   17.38
  -5  -8  -9  498.56   20.32
  -5  -8 -10 1091.17   27.69
  -5  -8 -10 1152.64   31.43
  -5  -8 -11  280.25   17.08
  -5  -8 -11  231.31   17.95
  -5  -8 -12  565.30   24.23
  -5  -8 -12  525.63   25.00
  -5  -8 -13   96.12   15.81
  -5  -8 -14  181.97   19.49
   5  -7 -15    2.31   15.17
   5  -7 -14   43.20   15.96
   5  -7 -13  265.56   21.39
   5  -7 -12   54.05   13.78
   5  -7 -11  770.21   29.29
   5  -7 -10  412.73   14.54
   5  -7 -10  435.48   21.47
   5  -7  -9  746.00   25.75
   5  -7  -9  768.18   19.65
   5  -7  -8  967.11   21.99
  -5  -7   8  912.46   20.47
   5  -7  -7  444.59   18.49
  -5  -7   7  422.05   14.07
   5  -7  -7  384.91   14.49
   5  -7  -6  643.45   18.50
  -5  -7   6  645.48   16.95
  -5  -7   5  330.22   12.34
   5  -7  -5  341.89   13.80
   5  -7  -4  107.38    8.40
  -5  -7   4  137.40    8.53
   5  -7  -4  147.54    9.66
   5  -7  -3 1725.53   27.88
  -5  -7   3 1735.85   25.90
   5  -7  -3 1841.49   26.72
   5  -7  -2  246.20   11.18
  -5  -7   2  283.01   11.19
   5  -7  -2  278.39   10.90
   5  -7  -1   47.28    6.28
  -5  -7   1   69.05    6.54
   5  -7   0  360.55   12.61
  -5  -7   0  352.00   12.21
   5  -7   1 1882.16   26.86
  -5  -7  -1 1784.83   26.03
  -5  -7  -2  290.18   11.39
   5  -7   2  277.22   10.83
   5  -7   3 2194.93   28.00
  -5  -7  -3 2165.07   28.79
   5  -7   4  380.58   12.08
  -5  -7  -4  346.39   12.07
  -5  -7  -5 2460.15   30.11
  -5  -7  -5 2434.14   25.80
  -5  -7  -6  542.43   14.60
  -5  -7  -6  531.97   14.20
  -5  -7  -6  528.60   16.63
  -5  -7  -7  126.52    7.92
  -5  -7  -7  127.57    9.01
  -5  -7  -7  124.51   10.19
  -5  -7  -8  841.57   16.59
  -5  -7  -8  839.87   21.01
  -5  -7  -8  883.28   23.77
  -5  -7  -9  219.36   13.23
  -5  -7  -9  209.77   14.41
  -5  -7 -10   10.56    9.88
  -5  -7 -10   38.45    9.72
  -5  -7 -11  600.56   22.86
  -5  -7 -11  570.57   24.09
  -5  -7 -12   78.90   12.49
  -5  -7 -12   87.16   14.58
  -5  -7 -13  208.40   17.79
  -5  -7 -13  199.08   18.64
  -5  -7 -14  266.70   21.25
  -5  -7 -14  300.05   21.87
   5  -6 -15  489.23   29.23
   5  -6 -14   36.51   14.57
   5  -6 -13  520.21   27.08
   5  -6 -12   23.24   11.34
   5  -6 -11   86.24   13.34
   5  -6 -10  113.43    8.35
   5  -6 -10   87.35   13.39
   5  -6  -9  983.41   21.00
   5  -6  -9  905.99   27.46
   5  -6  -8  159.89   13.54
  -5  -6   8  176.89   10.08
  -5  -6   7 2671.22   33.32
   5  -6  -7 2836.97   42.24
   5  -6  -7 2726.98   35.33
  -5  -6   6  106.63    8.05
   5  -6  -6  108.75    8.38
  -5  -6   5  156.58    8.82
   5  -6  -5  152.52   10.05
  -5  -6   4   24.25    5.02
   5  -6  -4   21.50    5.78
   5  -6  -4   16.26    5.48
  -5  -6   3   63.55    6.26
   5  -6  -3   71.66    7.03
   5  -6  -3   87.98    7.52
  -5  -6   2  441.93   13.15
   5  -6  -2  448.26   14.26
   5  -6  -2  422.83   12.56
   5  -6  -1 3465.47   36.99
  -5  -6   1 3499.04   35.64
   5  -6   0  151.31    8.78
  -5  -6   0  153.46    8.43
  -5  -6  -1  972.57   18.93
   5  -6   1  943.59   18.85
   5  -6   2   73.55    6.49
  -5  -6  -2   53.85    5.90
   5  -6   3  344.40   11.55
  -5  -6  -3  345.09   11.75
  -5  -6  -4    3.38    4.32
   5  -6   4    6.04    4.49
  -5  -6  -5  773.29   16.52
   5  -6   5  768.12   16.51
  -5  -6  -5  790.60   15.48
  -5  -6  -5  820.50   18.63
  -5  -6  -6  204.97    8.98
  -5  -6  -6  179.53    9.53
   5  -6   6  182.36    8.88
  -5  -6  -6  196.07   10.98
  -5  -6  -7 1705.11   22.69
  -5  -6  -7 1652.98   26.78
  -5  -6  -7 1699.81   29.89
  -5  -6  -8  309.55    9.66
  -5  -6  -8  283.75   13.43
  -5  -6  -8  264.86   14.16
  -5  -6  -9  758.95   22.05
  -5  -6  -9  824.55   24.66
  -5  -6 -10   37.35   10.31
  -5  -6 -10   47.23    9.97
  -5  -6 -11   91.81   12.70
  -5  -6 -11  113.28   13.55
  -5  -6 -12  122.43   14.27
  -5  -6 -12   77.63   13.68
  -5  -6 -13  476.32   23.65
  -5  -6 -13  490.42   25.22
  -5  -6 -14   45.94   14.19
  -5  -6 -14   64.94   15.07
  -5  -6 -15  776.65   34.01
  -5  -6 -15  893.67   35.17
   5  -5 -15    6.53   14.93
   5  -5 -14  194.50   19.85
   5  -5 -13  674.46   29.17
   5  -5 -12   78.35   13.67
   5  -5 -11  705.12   27.05
   5  -5 -10   43.36    6.03
   5  -5 -10   24.78   10.11
   5  -5  -9  371.16   12.65
   5  -5  -9  355.64   17.97
  -5  -5   9  379.76   13.89
   5  -5  -8  553.99   15.73
  -5  -5   8  570.68   16.44
   5  -5  -8  542.94   20.48
   5  -5  -7  350.77   16.11
  -5  -5   7  376.13   13.43
   5  -5  -7  363.92   13.24
  -5  -5   6   86.86    7.36
   5  -5  -6   81.39    9.18
   5  -5  -6   86.84    7.92
  -5  -5   5  830.59   18.06
   5  -5  -5  818.19   19.13
  -5  -5   4  180.76    9.25
   5  -5  -4  187.64   10.01
   5  -5  -4  162.30    8.97
   5  -5  -3 2554.83   32.77
  -5  -5   3 2490.97   29.81
  -5  -5   2 1214.54   20.78
   5  -5  -2 1175.21   21.88
   5  -5  -2 1221.16   20.29
  -5  -5   1  471.85   13.23
   5  -5  -1  526.12   14.78
   5  -5   0  184.34    9.23
  -5  -5   0  181.96    8.67
   5  -5   1  622.15   15.51
  -5  -5  -1  649.03   15.19
   5  -5   2  890.12   17.95
  -5  -5  -2  854.51   17.16
   5  -5   3 1897.49   25.52
  -5  -5  -3 1951.90   25.55
   5  -5   4  353.71   11.73
  -5  -5  -4  343.38   11.57
  -5  -5  -4  381.70   11.64
  -5  -5  -5 1516.24   21.69
   5  -5   5 1463.09   22.30
  -5  -5  -5 1504.85   24.44
  -5  -5  -6  448.56   11.98
  -5  -5  -6  432.16   14.51
  -5  -5  -6  466.11   13.84
   5  -5   6  464.58   13.04
  -5  -5  -7   34.88    4.64
  -5  -5  -7   39.14    7.70
  -5  -5  -7   37.30    7.09
  -5  -5  -8  286.28    8.23
  -5  -5  -8  288.42   13.78
  -5  -5  -8  262.30   13.92
  -5  -5  -9  631.94   20.60
  -5  -5  -9  713.59   22.95
  -5  -5 -10   69.33   11.00
  -5  -5 -10   65.44   10.97
  -5  -5 -11  862.23   28.45
  -5  -5 -11  862.09   27.33
  -5  -5 -12   57.17   12.93
  -5  -5 -12   67.15   12.94
  -5  -5 -13  396.12   22.83
  -5  -5 -13  381.13   22.38
  -5  -5 -14  230.65   19.74
  -5  -5 -14  277.60   21.26
  -5  -5 -15    6.05   13.45
  -5  -5 -15  -17.26   15.02
   5  -4 -15  162.71   20.66
   5  -4 -14  107.68   16.60
   5  -4 -13   32.57   13.05
   5  -4 -12  624.08   26.80
   5  -4 -11   31.32   11.57
   5  -4 -10  465.16   21.18
   5  -4  -9 1133.61   19.99
  -5  -4   9 1096.63   22.65
   5  -4  -8  126.59    8.20
  -5  -4   8  122.54    8.73
   5  -4  -8   99.78   11.27
   5  -4  -7  427.29   13.57
   5  -4  -7  388.19   16.28
  -5  -4   7  430.06   13.86
   5  -4  -6  729.84   20.03
  -5  -4   6  711.75   17.28
   5  -4  -6  702.26   17.32
  -5  -4   5  401.25   12.94
   5  -4  -5  419.31   12.52
   5  -4  -5  440.61   14.06
  -5  -4   4 3917.47   37.30
   5  -4  -4 3864.87   35.14
   5  -4  -4 3836.17   39.18
   5  -4  -3  349.39   12.55
  -5  -4   3  344.35   11.75
   5  -4  -3  328.95   10.72
   5  -4  -2 1202.44   21.75
  -5  -4   2 1109.12   19.61
  -5  -4   1 1212.85   20.28
   5  -4  -1 1250.95   21.91
  -5  -4   0   89.15    6.51
   5  -4   0   85.47    6.99
  -5  -4  -1   37.64    5.12
   5  -4   1   47.87    5.96
   5  -4   2 1691.73   24.49
  -5  -4  -2 1625.55   22.70
   5  -4   3   97.39    7.18
  -5  -4  -3   98.02    6.55
   5  -4   4 1561.37   22.86
  -5  -4  -4 1565.57   22.83
  -5  -4  -4 1563.41   21.59
  -5  -4  -5  685.97   14.13
   5  -4   5  631.43   14.79
  -5  -4  -5  640.12   15.96
  -5  -4  -6   78.28    5.64
  -5  -4  -6   91.24    8.19
  -5  -4  -6   78.04    7.72
   5  -4   6   85.44    6.57
  -5  -4  -7  659.49   12.24
  -5  -4  -7  675.23   18.14
  -5  -4  -7  698.69   19.40
  -5  -4  -8  272.76   13.53
  -5  -4  -8  287.44   14.34
  -5  -4  -9  469.90   18.25
  -5  -4  -9  537.90   19.79
  -5  -4 -10 1294.31   30.97
  -5  -4 -10 1272.91   31.45
  -5  -4 -11  135.15   13.53
  -5  -4 -11  150.88   14.66
  -5  -4 -12  524.75   24.04
  -5  -4 -12  535.90   24.13
  -5  -4 -13  190.47   17.89
  -5  -4 -13  212.54   19.00
  -5  -4 -14  281.17   21.30
  -5  -4 -14  287.95   21.79
  -5  -4 -15  368.80   25.24
  -5  -4 -15  370.68   25.58
   5  -3 -15    3.30   13.55
   5  -3 -14  877.90   33.81
   5  -3 -13   29.12   12.93
   5  -3 -12   61.48   12.78
   5  -3 -11    8.20    9.33
   5  -3 -10  445.45   20.03
   5  -3  -9   44.10    5.70
  -5  -3   9   37.38    6.79
   5  -3  -9   44.66   10.00
   5  -3  -8 1300.29   21.21
   5  -3  -8 1304.45   28.68
  -5  -3   8 1335.83   24.45
   5  -3  -7  361.25   12.10
  -5  -3   7  371.84   12.94
   5  -3  -7  393.52   16.16
   5  -3  -6 1834.79   26.28
   5  -3  -6 1765.88   29.46
  -5  -3   5   66.51    6.60
   5  -3  -5   59.78    5.99
   5  -3  -5   64.58    6.49
  -5  -3   4   67.06    6.40
   5  -3  -4   75.65    6.35
   5  -3  -4   71.84    6.67
  -5  -3   3  550.80   14.16
   5  -3  -3  519.46   12.94
   5  -3  -3  538.03   14.74
  -5  -3   2 1526.60   22.62
   5  -3  -2 1468.88   23.58
  -5  -3   1  255.56    9.83
[truncated: 262,600 more chars]
