# Supplementary material
Source: MDPI journal article supplement (https://www.mdpi.com/2073-4352/10/12/1122)
Supplement: s1 [file s1 › Compound_2.cif]

data_Compound_2_uco3_10
_audit_creation_date               2020-10-11
_audit_creation_method
;
Olex2 1.3
(compiled 2020.07.31 svn.rc2a77460 for OlexSys, GUI svn.r6145)
;
_shelx_SHELXL_version_number       '2018/3'
_audit_contact_author_address      ?
_audit_contact_author_email        ?
_audit_contact_author_name         ''
_audit_contact_author_phone        ?
_publ_contact_author_id_orcid      ?
_publ_section_references
;
Dolomanov, O.V., Bourhis, L.J., Gildea, R.J, Howard, J.A.K. & Puschmann, H.
 (2009), J. Appl. Cryst. 42, 339-341.

Sheldrick, G.M. (2015). Acta Cryst. C71, 3-8.
;
_chemical_name_common              ?
_chemical_name_systematic          ?
_chemical_formula_moiety          
 '0.5(Cl3 N O5 U), Cl1.5 K0.5 N0.5 O2.5 U0.5, 2.5(K), N O3'
_chemical_formula_sum              'Cl3 K3 N2 O8 U'
_chemical_formula_weight           617.70
_chemical_absolute_configuration   ?
_chemical_melting_point            ?

loop_
  _atom_type_symbol
  _atom_type_description
  _atom_type_scat_dispersion_real
  _atom_type_scat_dispersion_imag
  _atom_type_scat_source
 'Cl' 'Cl' 0.1484 0.1585 'International Tables Vol C Tables 4.2.6.8 and 6.1.1.4'
 'K' 'K' 0.2009 0.2494 'International Tables Vol C Tables 4.2.6.8 and 6.1.1.4'
 'N' 'N' 0.0061 0.0033 'International Tables Vol C Tables 4.2.6.8 and 6.1.1.4'
 'O' 'O' 0.0106 0.0060 'International Tables Vol C Tables 4.2.6.8 and 6.1.1.4'
 'U' 'U' -9.6767 9.6646 'International Tables Vol C Tables 4.2.6.8 and 6.1.1.4'

_shelx_space_group_comment
;
The symmetry employed for this shelxl refinement is uniquely defined
by the following loop, which should always be used as a source of
symmetry information in preference to the above space-group names.
They are only intended as comments.
;
_space_group_crystal_system        'monoclinic'
_space_group_IT_number             4
_space_group_name_H-M_alt          'P 1 21 1'
_space_group_name_Hall             'P 2yb'
loop_
  _space_group_symop_operation_xyz
 'x, y, z'
 '-x, y+1/2, -z'

_cell_length_a                     7.8596(2)
_cell_length_b                     15.8675(3)
_cell_length_c                     10.6823(2)
_cell_angle_alpha                  90
_cell_angle_beta                   90.141(2)
_cell_angle_gamma                  90
_cell_volume                       1332.21(5)
_cell_formula_units_Z              4
_cell_measurement_reflns_used      11361
_cell_measurement_temperature      293(2)
_cell_measurement_theta_max        36.5070
_cell_measurement_theta_min        1.9150
_shelx_estimated_absorpt_T_max     ?
_shelx_estimated_absorpt_T_min     ?
_exptl_absorpt_coefficient_mu      13.747
_exptl_absorpt_correction_T_max    1.00000
_exptl_absorpt_correction_T_min    0.63713
_exptl_absorpt_correction_type     multi-scan
_exptl_absorpt_process_details
;
CrysAlisPro 1.171.39.44a (Rigaku Oxford Diffraction, 2018)
Empirical absorption correction using spherical harmonics,
 implemented in SCALE3 ABSPACK scaling algorithm.
;
_exptl_absorpt_special_details     ?
_exptl_crystal_colour              'yellow'
_exptl_crystal_density_diffrn      3.080
_exptl_crystal_density_meas        ?
_exptl_crystal_density_method      ?
_exptl_crystal_description         'prism'
_exptl_crystal_F_000               1112
_exptl_crystal_size_max            0.24
_exptl_crystal_size_mid            0.18
_exptl_crystal_size_min            0.13
_exptl_transmission_factor_max     ?
_exptl_transmission_factor_min     ?
_diffrn_reflns_av_R_equivalents    0.0216
_diffrn_reflns_av_unetI/netI       0.0325
_diffrn_reflns_Laue_measured_fraction_full  0.998
_diffrn_reflns_Laue_measured_fraction_max  0.941
_diffrn_reflns_limit_h_max         13
_diffrn_reflns_limit_h_min         -13
_diffrn_reflns_limit_k_max         25
_diffrn_reflns_limit_k_min         -26
_diffrn_reflns_limit_l_max         17
_diffrn_reflns_limit_l_min         -15
_diffrn_reflns_number              22471
_diffrn_reflns_point_group_measured_fraction_full  0.986
_diffrn_reflns_point_group_measured_fraction_max  0.886
_diffrn_reflns_theta_full          25.242
_diffrn_reflns_theta_max           36.420
_diffrn_reflns_theta_min           1.906
_diffrn_ambient_temperature        293(2)
_diffrn_detector                   'CCD plate'
_diffrn_detector_area_resol_mean   ?
_diffrn_measured_fraction_theta_full  0.998
_diffrn_measured_fraction_theta_max  0.941
_diffrn_measurement_details
;
List of Runs (angles in degrees, time in seconds):

  # Type    Start    End  Width  t~exp~   \w     \q     \k     \f   Frames
--------------------------------------------------------------------------
  1  \w      8.21 192.21   0.50   50.00    --   34.00  73.86 -25.79  368
  2  \w      8.21 192.21   0.50   50.00    --   34.00  73.86  64.21  368
  3  \w      8.21 192.21   0.50   50.00    --   34.00  73.86 154.21  368
;
_diffrn_measurement_device         'Bruker Smart Apex-II CCD'
_diffrn_measurement_device_type   
 'Saxi-CrysAlisPro-abstract goniometer imported SAXI images'
_diffrn_measurement_method         '\w scans'
_diffrn_orient_matrix_type        
 'CrysAlisPro convention (1999,Acta A55,543-557)'
_diffrn_orient_matrix_UB_11        0.0688080000
_diffrn_orient_matrix_UB_12        0.0119587000
_diffrn_orient_matrix_UB_13        -0.0389815000
_diffrn_orient_matrix_UB_21        -0.0583029000
_diffrn_orient_matrix_UB_22        0.0159216000
_diffrn_orient_matrix_UB_23        -0.0449209000
_diffrn_orient_matrix_UB_31        0.0026657000
_diffrn_orient_matrix_UB_32        0.0400283000
_diffrn_orient_matrix_UB_33        0.0295319000
_diffrn_radiation_monochromator    graphite
_diffrn_radiation_probe            x-ray
_diffrn_radiation_type             'Mo K\a'
_diffrn_radiation_wavelength       0.71073
_diffrn_source                     'fine-focus sealed X-ray tube'
_diffrn_source_type                'Enhance (Mo) X-ray Source'
_reflns_Friedel_coverage           0.831
_reflns_Friedel_fraction_full      0.973
_reflns_Friedel_fraction_max       0.827
_reflns_number_gt                  8552
_reflns_number_total               11537
_reflns_odcompleteness_completeness  94.05
_reflns_odcompleteness_iscentric   1
_reflns_odcompleteness_theta       36.33
_reflns_special_details
;
 Reflections were merged by SHELXL according to the crystal
 class for the calculation of statistics and refinement.
 
 _reflns_Friedel_fraction is defined as the number of unique
 Friedel pairs measured divided by the number that would be
 possible theoretically, ignoring centric projections and
 systematic absences. Completness statistics refer to single and
 composite reflections containing twin component 1 only.
;
_reflns_threshold_expression       'I > 2\s(I)'
_computing_cell_refinement         'CrysAlisPro 1.171.39.44a (Rigaku OD, 2018)'
_computing_data_collection         'CrysAlisPro 1.171.39.44a (Rigaku OD, 2018)'
_computing_data_reduction          'CrysAlisPro 1.171.39.44a (Rigaku OD, 2018)'
_computing_molecular_graphics      'Olex2 1.3 (Dolomanov et al., 2009)'
_computing_publication_material    'Olex2 1.3 (Dolomanov et al., 2009)'
_computing_structure_refinement    'SHELXL (Sheldrick, 2015)'
_computing_structure_solution      'SHELXT (Sheldrick, 2015)'
_refine_diff_density_max           1.018
_refine_diff_density_min           -0.695
_refine_diff_density_rms           0.161
_refine_ls_abs_structure_details
;
 Refined as an inversion twin.
;
_refine_ls_abs_structure_Flack     0.488(15)
_refine_ls_extinction_coef         .
_refine_ls_extinction_method       none
_refine_ls_goodness_of_fit_ref     1.019
_refine_ls_hydrogen_treatment      undef
_refine_ls_matrix_type             full
_refine_ls_number_parameters       356
_refine_ls_number_reflns           11537
_refine_ls_number_restraints       1
_refine_ls_R_factor_all            0.0475
_refine_ls_R_factor_gt             0.0254
_refine_ls_restrained_S_all        1.018
_refine_ls_shift/su_max            0.000
_refine_ls_shift/su_mean           0.000
_refine_ls_structure_factor_coef   Fsqd
_refine_ls_weighting_details      
 'w=1/[\s^2^(Fo^2^)+(0.0173P)^2^+1.4306P] where P=(Fo^2^+2Fc^2^)/3'
_refine_ls_weighting_scheme        calc
_refine_ls_wR_factor_gt            0.0449
_refine_ls_wR_factor_ref           0.0501
_refine_special_details
;
 Refined as a 2-component inversion twin.
;
_olex2_refinement_description
;
1. Twinned data refinement
 Scales: 0.512(15)
 0.488(15)
2. Uiso/Uaniso restraints and constraints
Uanis(O16B) = Uanis(O16A)
3. Others
 Fixed Sof: O11A(0.5) O11B(0.5) O12A(0.5) O12B(0.5) O13A(0.5) O13B(0.5)
 O14A(0.5) O14B(0.5) O15A(0.5) O15B(0.5) O16A(0.5) O16B(0.5)
;
_atom_sites_solution_hydrogens     .
_atom_sites_solution_primary       ?
_atom_sites_solution_secondary     ?
loop_
  _atom_site_label
  _atom_site_type_symbol
  _atom_site_fract_x
  _atom_site_fract_y
  _atom_site_fract_z
  _atom_site_U_iso_or_equiv
  _atom_site_adp_type
  _atom_site_occupancy
  _atom_site_site_symmetry_order
  _atom_site_calc_flag
  _atom_site_refinement_flags_posn
  _atom_site_refinement_flags_adp
  _atom_site_refinement_flags_occupancy
  _atom_site_disorder_assembly
  _atom_site_disorder_group
 U1 U 0.05589(9) 0.60545(2) 1.18267(6) 0.02076(17) Uani 1 1 d . . . . .
 U2 U 0.44407(9) 0.27354(2) 1.31754(6) 0.02080(17) Uani 1 1 d . . . . .
 K1 K 0.5064(8) 0.7565(3) 1.2676(5) 0.0547(13) Uani 1 1 d . . . . .
 K2 K 0.4723(7) 0.5237(4) 1.5164(5) 0.0350(11) Uani 1 1 d . . . . .
 K3 K 0.4980(7) 0.5509(3) 0.9566(5) 0.0370(12) Uani 1 1 d . . . . .
 K4 K 0.0099(8) 0.6243(4) 0.7565(6) 0.0659(16) Uani 1 1 d . . . . .
 K5 K 0.0344(8) 0.3583(4) 0.9861(5) 0.0416(13) Uani 1 1 d . . . . .
 K6 K -0.0027(7) 0.3263(3) 0.5446(5) 0.0353(11) Uani 1 1 d . . . . .
 Cl1 Cl 0.3810(8) 0.5677(4) 1.2408(5) 0.0367(13) Uani 1 1 d . . . . .
 Cl2 Cl 0.2252(8) 0.6986(4) 1.0090(6) 0.0392(14) Uani 1 1 d . . . . .
 Cl3 Cl -0.2150(7) 0.6715(4) 1.0616(6) 0.0389(13) Uani 1 1 d . . . . .
 Cl4 Cl 0.1213(8) 0.3096(4) 1.2559(6) 0.0374(14) Uani 1 1 d . . . . .
 Cl5 Cl 0.2769(7) 0.1823(4) 1.4904(6) 0.0388(14) Uani 1 1 d . . . . .
 Cl6 Cl 0.7152(8) 0.2042(4) 1.4356(6) 0.0399(14) Uani 1 1 d . . . . .
 O1 O 0.0474(19) 0.5216(9) 1.0761(13) 0.040(3) Uani 1 1 d . . . . .
 O2 O 0.058(2) 0.6968(10) 1.2794(15) 0.035(3) Uani 1 1 d . . . . .
 O3 O -0.196(2) 0.5402(11) 1.2853(16) 0.041(4) Uani 1 1 d . . . . .
 O4 O 0.0440(19) 0.5107(12) 1.3681(15) 0.044(4) Uani 1 1 d . . . . .
 O5 O -0.185(2) 0.4706(12) 1.4556(18) 0.064(5) Uani 1 1 d . . . . .
 O6 O 0.4467(19) 0.1911(10) 1.2105(14) 0.032(3) Uani 1 1 d . . . . .
 O7 O 0.4405(17) 0.3626(8) 1.4171(13) 0.032(3) Uani 1 1 d . . . . .
 O8 O 0.6958(19) 0.3343(10) 1.2094(16) 0.035(3) Uani 1 1 d . . . . .
 O9 O 0.456(2) 0.3640(11) 1.1245(13) 0.044(4) Uani 1 1 d . . . . .
 O10 O 0.693(2) 0.4166(11) 1.0434(15) 0.046(3) Uani 1 1 d . . . . .
 O11A O 0.235(4) 0.4816(19) 0.852(2) 0.044(6) Uani 0.5 1 d . . P A 1
 O11B O 0.309(3) 0.4052(15) 0.8622(19) 0.035(5) Uani 0.5 1 d . . P A 2
 O12A O 0.232(3) 0.3624(13) 0.7516(15) 0.035(6) Uani 0.5 1 d . . P A 1
 O12B O 0.263(3) 0.3915(14) 0.673(2) 0.037(5) Uani 0.5 1 d . . P A 2
 O13A O 0.196(4) 0.4786(19) 0.650(2) 0.062(8) Uani 0.5 1 d . . P A 1
 O13B O 0.272(3) 0.5173(16) 0.750(3) 0.062(9) Uani 0.5 1 d . . P A 2
 O14A O 0.819(6) 0.491(2) 0.821(3) 0.060(7) Uani 0.5 1 d . . P B 1
 O14B O 0.908(4) 0.442(3) 0.773(4) 0.066(10) Uani 0.5 1 d . . P B 2
 O15A O 0.603(5) 0.462(3) 0.727(3) 0.063(10) Uani 0.5 1 d . . P B 1
 O15B O 0.676(6) 0.377(3) 0.702(3) 0.082(11) Uani 0.5 1 d . . P B 2
 O16A O 0.805(6) 0.3593(17) 0.755(3) 0.051(4) Uani 0.5 1 d . . P B 1
 O16B O 0.686(6) 0.5021(17) 0.756(3) 0.051(4) Uani 0.5 1 d . . P B 2
 N1 N -0.1205(17) 0.5052(9) 1.3686(14) 0.032(3) Uani 1 1 d . . . . .
 N2 N 0.611(2) 0.3720(9) 1.1189(15) 0.039(4) Uani 1 1 d . . . . .
 N3 N 0.2766(13) 0.4395(12) 0.7584(14) 0.033(2) Uani 1 1 d . . . . .
 N4 N 0.747(3) 0.4447(18) 0.746(2) 0.034(2) Uani 1 1 d . . . . .

loop_
  _atom_site_aniso_label
  _atom_site_aniso_U_11
  _atom_site_aniso_U_22
  _atom_site_aniso_U_33
  _atom_site_aniso_U_23
  _atom_site_aniso_U_13
  _atom_site_aniso_U_12
 U1 0.0243(4) 0.0189(4) 0.0192(4) -0.0021(3) 0.0003(3) 0.0000(3)
 U2 0.0246(4) 0.0181(4) 0.0197(4) -0.0012(3) 0.0016(3) -0.0013(3)
 K1 0.070(3) 0.041(2) 0.0530(19) 0.0071(16) -0.0093(18) -0.013(2)
 K2 0.039(2) 0.029(2) 0.037(2) 0.0002(17) 0.0036(17) -0.0017(16)
 K3 0.042(3) 0.037(2) 0.033(2) -0.0078(18) 0.000(2) 0.011(2)
 K4 0.059(3) 0.046(3) 0.094(3) 0.025(2) 0.006(2) 0.009(2)
 K5 0.066(3) 0.0243(19) 0.035(2) -0.0015(17) 0.001(2) -0.0047(19)
 K6 0.039(2) 0.032(2) 0.035(2) -0.0003(18) -0.001(2) -0.0028(18)
 Cl1 0.029(3) 0.049(3) 0.032(2) 0.011(2) 0.002(2) 0.009(2)
 Cl2 0.043(3) 0.035(3) 0.040(3) 0.016(2) 0.019(2) -0.002(2)
 Cl3 0.028(3) 0.046(3) 0.043(3) 0.011(2) -0.009(2) 0.000(2)
 Cl4 0.026(3) 0.047(3) 0.040(3) 0.000(2) -0.006(2) 0.001(2)
 Cl5 0.038(3) 0.034(3) 0.045(3) 0.012(2) 0.011(2) 0.010(2)
 Cl6 0.037(3) 0.030(2) 0.053(3) 0.007(2) -0.015(3) -0.0015(19)
 O1 0.052(6) 0.035(5) 0.034(6) -0.014(4) 0.002(5) 0.010(4)
 O2 0.051(7) 0.022(4) 0.034(5) -0.011(4) 0.004(4) -0.004(4)
 O3 0.039(7) 0.042(7) 0.042(7) 0.012(6) -0.005(6) -0.003(6)
 O4 0.034(8) 0.049(8) 0.048(7) 0.008(6) 0.008(6) 0.006(6)
 O5 0.077(10) 0.044(7) 0.070(9) 0.030(6) 0.044(7) 0.013(6)
 O6 0.037(5) 0.032(5) 0.026(4) -0.007(3) 0.001(4) 0.000(4)
 O7 0.042(5) 0.017(4) 0.036(6) -0.006(3) -0.004(4) -0.008(4)
 O8 0.026(6) 0.034(6) 0.045(7) 0.002(5) 0.012(5) 0.001(5)
 O9 0.040(8) 0.059(9) 0.032(6) 0.027(6) 0.004(5) 0.012(7)
 O10 0.051(7) 0.039(6) 0.048(7) 0.019(5) 0.018(5) 0.000(5)
 O11A 0.048(11) 0.070(13) 0.013(6) -0.012(6) 0.005(6) -0.020(8)
 O11B 0.048(12) 0.036(9) 0.020(7) 0.000(6) -0.013(7) -0.003(8)
 O12A 0.060(13) 0.025(10) 0.021(7) 0.000(6) -0.008(7) 0.018(8)
 O12B 0.041(10) 0.034(8) 0.037(12) -0.018(8) -0.013(8) 0.008(7)
 O13A 0.065(16) 0.070(17) 0.051(13) 0.037(12) 0.031(11) 0.002(13)
 O13B 0.037(12) 0.029(12) 0.12(2) 0.009(13) 0.020(12) -0.011(9)
 O14A 0.100(19) 0.042(9) 0.039(9) 0.000(7) 0.017(10) -0.052(11)
 O14B 0.028(9) 0.11(3) 0.065(15) 0.019(15) -0.007(9) 0.010(12)
 O15A 0.056(17) 0.09(2) 0.040(11) 0.013(12) -0.004(10) 0.041(15)
 O15B 0.09(2) 0.09(2) 0.064(18) -0.004(15) 0.018(16) -0.066(17)
 O16A 0.079(7) 0.025(10) 0.051(6) 0.009(6) 0.023(5) 0.019(8)
 O16B 0.079(7) 0.025(10) 0.051(6) 0.009(6) 0.023(5) 0.019(8)
 N1 0.031(5) 0.031(6) 0.033(5) 0.000(4) 0.015(4) -0.012(4)
 N2 0.058(8) 0.028(6) 0.032(5) 0.010(4) 0.008(5) 0.024(5)
 N3 0.038(7) 0.034(2) 0.027(4) -0.001(3) 0.000(4) -0.008(6)
 N4 0.039(3) 0.026(6) 0.036(3) 0.005(3) 0.003(2) 0.004(3)

_geom_special_details
;
 All esds (except the esd in the dihedral angle between two l.s. planes)
 are estimated using the full covariance matrix.  The cell esds are taken
 into account individually in the estimation of esds in distances, angles
 and torsion angles; correlations between esds in cell parameters are only
 used when they are defined by crystal symmetry.  An approximate (isotropic)
 treatment of cell esds is used for estimating esds involving l.s. planes.
;
loop_
  _geom_bond_atom_site_label_1
  _geom_bond_atom_site_label_2
  _geom_bond_distance
  _geom_bond_site_symmetry_2
  _geom_bond_publ_flag
 U1 Cl1 2.695(6) . ?
 U1 Cl2 2.722(5) . ?
 U1 Cl3 2.700(6) . ?
 U1 O1 1.752(14) . ?
 U1 O2 1.780(15) . ?
 U1 O3 2.492(16) . ?
 U1 O4 2.488(16) . ?
 U1 N1 2.900(12) . ?
 U2 Cl4 2.681(6) . ?
 U2 Cl5 2.692(6) . ?
 U2 Cl6 2.708(6) . ?
 U2 O6 1.737(15) . ?
 U2 O7 1.769(12) . ?
 U2 O8 2.488(14) . ?
 U2 O9 2.514(13) . ?
 U2 N2 2.948(15) . ?
 O3 N1 1.20(2) . ?
 O4 N1 1.296(19) . ?
 O5 N1 1.19(2) . ?
 O8 N2 1.32(2) . ?
 O9 N2 1.23(2) . ?
 O10 N2 1.25(2) . ?
 O11A N3 1.25(3) . ?
 O11B N3 1.26(3) . ?
 O12A N3 1.27(3) . ?
 O12B N3 1.19(3) . ?
 O13A N3 1.46(3) . ?
 O13B N3 1.24(3) . ?
 O14A N4 1.22(4) . ?
 O14B N4 1.30(4) . ?
 O15A N4 1.18(4) . ?
 O15B N4 1.30(4) . ?
 O16A N4 1.43(4) . ?
 O16B N4 1.04(4) . ?

loop_
  _geom_angle_atom_site_label_1
  _geom_angle_atom_site_label_2
  _geom_angle_atom_site_label_3
  _geom_angle
  _geom_angle_site_symmetry_1
  _geom_angle_site_symmetry_3
  _geom_angle_publ_flag
 Cl1 U1 Cl2 79.21(18) . . ?
 Cl1 U1 Cl3 160.48(18) . . ?
 Cl1 U1 N1 100.1(3) . . ?
 Cl2 U1 N1 179.3(3) . . ?
 Cl3 U1 Cl2 81.32(17) . . ?
 Cl3 U1 N1 99.4(3) . . ?
 O1 U1 Cl1 90.9(5) . . ?
 O1 U1 Cl2 89.3(5) . . ?
 O1 U1 Cl3 87.4(5) . . ?
 O1 U1 O2 174.6(7) . . ?
 O1 U1 O3 86.6(7) . . ?
 O1 U1 O4 93.3(6) . . ?
 O1 U1 N1 90.6(6) . . ?
 O2 U1 Cl1 92.4(5) . . ?
 O2 U1 Cl2 87.2(5) . . ?
 O2 U1 Cl3 88.1(6) . . ?
 O2 U1 O3 95.1(6) . . ?
 O2 U1 O4 91.7(7) . . ?
 O2 U1 N1 93.0(6) . . ?
 O3 U1 Cl1 124.1(4) . . ?
 O3 U1 Cl2 156.3(4) . . ?
 O3 U1 Cl3 75.2(4) . . ?
 O3 U1 N1 24.3(4) . . ?
 O4 U1 Cl1 73.7(4) . . ?
 O4 U1 Cl2 152.9(4) . . ?
 O4 U1 Cl3 125.8(4) . . ?
 O4 U1 O3 50.8(5) . . ?
 O4 U1 N1 26.4(5) . . ?
 Cl4 U2 Cl5 79.65(19) . . ?
 Cl4 U2 Cl6 160.8(2) . . ?
 Cl4 U2 N2 97.7(3) . . ?
 Cl5 U2 Cl6 81.18(17) . . ?
 Cl5 U2 N2 176.9(4) . . ?
 Cl6 U2 N2 101.5(3) . . ?
 O6 U2 Cl4 90.7(5) . . ?
 O6 U2 Cl5 93.1(5) . . ?
 O6 U2 Cl6 89.4(5) . . ?
 O6 U2 O7 175.8(7) . . ?
 O6 U2 O8 88.6(6) . . ?
 O6 U2 O9 83.7(7) . . ?
 O6 U2 N2 85.4(6) . . ?
 O7 U2 Cl4 87.8(5) . . ?
 O7 U2 Cl5 90.5(5) . . ?
 O7 U2 Cl6 93.3(5) . . ?
 O7 U2 O8 89.0(6) . . ?
 O7 U2 O9 92.1(6) . . ?
 O7 U2 N2 91.0(5) . . ?
 O8 U2 Cl4 123.8(4) . . ?
 O8 U2 Cl5 156.5(4) . . ?
 O8 U2 Cl6 75.4(4) . . ?
 O8 U2 O9 50.7(5) . . ?
 O8 U2 N2 26.3(5) . . ?
 O9 U2 Cl4 73.4(4) . . ?
 O9 U2 Cl5 152.8(4) . . ?
 O9 U2 Cl6 125.6(4) . . ?
 O9 U2 N2 24.3(4) . . ?
 N1 O3 U1 97.2(11) . . ?
 N1 O4 U1 94.8(10) . . ?
 N2 O8 U2 96.7(10) . . ?
 N2 O9 U2 98.0(10) . . ?
 O3 N1 U1 58.5(9) . . ?
 O3 N1 O4 117.2(14) . . ?
 O4 N1 U1 58.8(8) . . ?
 O5 N1 U1 172.0(15) . . ?
 O5 N1 O3 125.1(17) . . ?
 O5 N1 O4 117.5(18) . . ?
 O8 N2 U2 57.0(9) . . ?
 O9 N2 U2 57.6(9) . . ?
 O9 N2 O8 114.6(15) . . ?
 O9 N2 O10 127.1(16) . . ?
 O10 N2 U2 173.9(14) . . ?
 O10 N2 O8 118.1(16) . . ?
 O11A N3 O12A 119(2) . . ?
 O11A N3 O13A 107(2) . . ?
 O12A N3 O13A 104.1(18) . . ?
 O12B N3 O11B 114(2) . . ?
 O12B N3 O13B 126(2) . . ?
 O13B N3 O11B 120(2) . . ?
 O14A N4 O16A 112(4) . . ?
 O14B N4 O15B 118(4) . . ?
 O15A N4 O14A 115(4) . . ?
 O15A N4 O16A 122(4) . . ?
 O16B N4 O14B 117(5) . . ?
 O16B N4 O15B 124(5) . . ?

loop_
  _geom_torsion_atom_site_label_1
  _geom_torsion_atom_site_label_2
  _geom_torsion_atom_site_label_3
  _geom_torsion_atom_site_label_4
  _geom_torsion
  _geom_torsion_site_symmetry_1
  _geom_torsion_site_symmetry_2
  _geom_torsion_site_symmetry_3
  _geom_torsion_site_symmetry_4
  _geom_torsion_publ_flag
 U1 O3 N1 O4 -3.3(18) . . . . ?
 U1 O3 N1 O5 171.5(18) . . . . ?
 U1 O4 N1 O3 3.3(18) . . . . ?
 U1 O4 N1 O5 -171.9(15) . . . . ?
 U2 O8 N2 O9 1.0(18) . . . . ?
 U2 O8 N2 O10 175.7(14) . . . . ?
 U2 O9 N2 O8 -1.0(18) . . . . ?
 U2 O9 N2 O10 -175.1(17) . . . . ?

_shelx_res_file
;
TITL uco3_10_c.res in P2(1)
    uco3_10.res
    created by SHELXL-2018/3 at 02:01:41 on 11-Oct-2020
REM Old TITL uco3_10_c.res in P2(1)
REM SHELXT solution in P2(1): R1 0.062, Rweak 0.003, Alpha 0.028
REM <I/s> 1.112 for 8 systematic absences, Orientation as input
REM Flack x = 0.496 ( 0.005 ) from 2106 Parsons' quotients
REM Formula found by SHELXT: C11 Cl9 K4 N5 O11B U2
CELL 0.71073 7.8596 15.8675 10.6823 90 90.141 90
ZERR 4 0.0002 0.0003 0.0002 0 0.002 0
LATT -1
SYMM -X,0.5+Y,-Z
SFAC Cl K N O U
UNIT 12 12 8 32 4
EADP O16B O16A

L.S. 10
PLAN  8
CONF
CONN 0 $K
FREE O14A O15A
LIST 4
htab
MORE -1
fmap 2
ACTA
TWIN -1 0 0 0 -1 0 0 0 -1 2
REM <olex2.extras>
REM <HklSrc "%.\\UCO3_10.hkl">
REM </olex2.extras>

WGHT    0.017300    1.430600
BASF   0.48805
FVAR       0.29459
U1    5    0.055889    0.605449    1.182673    11.00000    0.02428    0.01886 =
         0.01916   -0.00208    0.00028    0.00001
U2    5    0.444070    0.273541    1.317541    11.00000    0.02462    0.01812 =
         0.01967   -0.00117    0.00161   -0.00127
K1    2    0.506414    0.756531    1.267617    11.00000    0.06988    0.04105 =
         0.05298    0.00711   -0.00927   -0.01271
K2    2    0.472300    0.523705    1.516450    11.00000    0.03896    0.02936 =
         0.03675    0.00021    0.00356   -0.00172
K3    2    0.497993    0.550869    0.956589    11.00000    0.04153    0.03684 =
         0.03274   -0.00784    0.00031    0.01091
K4    2    0.009922    0.624259    0.756528    11.00000    0.05853    0.04569 =
         0.09352    0.02456    0.00640    0.00935
K5    2    0.034386    0.358288    0.986142    11.00000    0.06585    0.02434 =
         0.03467   -0.00149    0.00130   -0.00471
K6    2   -0.002702    0.326285    0.544583    11.00000    0.03918    0.03163 =
         0.03498   -0.00035   -0.00091   -0.00279
CL1   1    0.380963    0.567705    1.240765    11.00000    0.02922    0.04900 =
         0.03179    0.01058    0.00163    0.00862
CL2   1    0.225173    0.698557    1.008977    11.00000    0.04292    0.03458 =
         0.04025    0.01554    0.01861   -0.00219
CL3   1   -0.214983    0.671461    1.061633    11.00000    0.02812    0.04582 =
         0.04264    0.01141   -0.00908   -0.00032
CL4   1    0.121317    0.309589    1.255861    11.00000    0.02571    0.04704 =
         0.03955    0.00028   -0.00623    0.00057
CL5   1    0.276927    0.182290    1.490446    11.00000    0.03800    0.03373 =
         0.04474    0.01241    0.01092    0.01021
CL6   1    0.715226    0.204184    1.435619    11.00000    0.03690    0.02971 =
         0.05287    0.00701   -0.01476   -0.00152
O1    4    0.047371    0.521619    1.076059    11.00000    0.05217    0.03483 =
         0.03417   -0.01388    0.00225    0.00966
O2    4    0.057568    0.696806    1.279358    11.00000    0.05054    0.02170 =
         0.03423   -0.01094    0.00419   -0.00380
O3    4   -0.196218    0.540151    1.285300    11.00000    0.03916    0.04186 =
         0.04231    0.01244   -0.00528   -0.00263
O4    4    0.044016    0.510742    1.368126    11.00000    0.03436    0.04929 =
         0.04848    0.00823    0.00846    0.00616
O5    4   -0.185299    0.470643    1.455584    11.00000    0.07678    0.04424 =
         0.07050    0.02999    0.04449    0.01254
O6    4    0.446741    0.191123    1.210545    11.00000    0.03683    0.03169 =
         0.02617   -0.00687    0.00121    0.00039
O7    4    0.440537    0.362643    1.417052    11.00000    0.04174    0.01680 =
         0.03629   -0.00580   -0.00381   -0.00758
O8    4    0.695832    0.334281    1.209432    11.00000    0.02649    0.03430 =
         0.04509    0.00173    0.01175    0.00076
O9    4    0.456283    0.363956    1.124511    11.00000    0.03974    0.05884 =
         0.03201    0.02688    0.00439    0.01192
O10   4    0.693169    0.416550    1.043362    11.00000    0.05087    0.03876 =
         0.04829    0.01924    0.01829    0.00017
PART 1
O11A  4    0.234507    0.481622    0.851835    10.50000    0.04787    0.07010 =
         0.01344   -0.01203    0.00478   -0.02006
PART 2
O11B  4    0.309096    0.405207    0.862198    10.50000    0.04822    0.03550 =
         0.02020   -0.00014   -0.01299   -0.00273
PART 1
O12A  4    0.231921    0.362429    0.751591    10.50000    0.05995    0.02496 =
         0.02121   -0.00006   -0.00806    0.01808
PART 2
O12B  4    0.263117    0.391475    0.673406    10.50000    0.04054    0.03363 =
         0.03666   -0.01835   -0.01252    0.00800
PART 1
O13A  4    0.195901    0.478601    0.649569    10.50000    0.06450    0.07032 =
         0.05109    0.03694    0.03108    0.00217
PART 2
O13B  4    0.271806    0.517299    0.750440    10.50000    0.03664    0.02947 =
         0.11942    0.00899    0.02002   -0.01068

PART 1
O14A  4    0.818802    0.491133    0.820528    10.50000    0.09987    0.04239 =
         0.03909   -0.00035    0.01661   -0.05175
PART 2
O14B  4    0.907569    0.442232    0.773338    10.50000    0.02838    0.10568 =
         0.06464    0.01859   -0.00718    0.00981
PART 1
O15A  4    0.602992    0.461679    0.726787    10.50000    0.05589    0.09207 =
         0.04029    0.01309   -0.00375    0.04097
PART 2
O15B  4    0.675667    0.376820    0.702349    10.50000    0.09342    0.08962 =
         0.06378   -0.00409    0.01843   -0.06555
PART 1
O16A  4    0.804505    0.359284    0.754510    10.50000    0.07948    0.02452 =
         0.05050    0.00866    0.02341    0.01870
PART 2
O16B  4    0.685725    0.502141    0.755791    10.50000    0.07948    0.02452 =
         0.05050    0.00866    0.02341    0.01870

PART 0
N1    3   -0.120514    0.505170    1.368582    11.00000    0.03123    0.03121 =
         0.03278   -0.00046    0.01527   -0.01161

N2    3    0.611341    0.372013    1.118856    11.00000    0.05762    0.02819 =
         0.03158    0.01022    0.00803    0.02380
N3    3    0.276556    0.439507    0.758395    11.00000    0.03763    0.03425 =
         0.02662   -0.00055   -0.00005   -0.00844
N4    3    0.746906    0.444711    0.745835    11.00000    0.03911    0.02561 =
         0.03625    0.00497    0.00348    0.00430
HKLF 4


REM  uco3_10_c.res in P2(1)
REM wR2 = 0.0501, GooF = S = 1.019, Restrained GooF = 1.018 for all data
REM R1 = 0.0254 for 8552 Fo > 4sig(Fo) and 0.0475 for all 11537 data
REM 356 parameters refined using 1 restraints

END

WGHT      0.0173      1.4308

REM No hydrogen bonds found for HTAB generation

REM Highest difference peak  1.018,  deepest hole -0.695,  1-sigma level  0.161
Q1    1   0.3504  0.2736  1.3211  11.00000  0.05    1.02
Q2    1   0.1512  0.6051  1.1780  11.00000  0.05    0.92
Q3    1   0.4781  0.2527  1.3777  11.00000  0.05    0.84
Q4    1   0.1119  0.5918  1.2425  11.00000  0.05    0.80
Q5    1   0.0224  0.6262  1.1230  11.00000  0.05    0.78
Q6    1   0.1229  0.6059  1.1041  11.00000  0.05    0.77
Q7    1   0.3791  0.2723  1.3937  11.00000  0.05    0.76
Q8    1   0.3880  0.2876  1.2565  11.00000  0.05    0.73
;
_shelx_res_checksum                50397
_shelx_hkl_file
;
   0   0   1    6.20    0.74
   0   0  -2 3690.45   10.56
   0   0   2 3740.12   14.00
   0   0   2 3667.64   11.81
   0   0   3    0.96    1.92
   0   0   3    4.17    2.36
   0   0   4 3326.71   16.02
   0   0   4 3319.43   18.90
   0   0  -4 3410.99   14.42
   0   0  -5   -2.28    2.17
   0   0   6 1410.86   12.79
   0   0  -6 1432.92   11.62
   0   0   6 1360.09   15.14
   0   0   7   -1.72    4.29
   0   0  -8 1223.44   12.52
   0   0   8 1221.36   16.78
   0   0   8 1214.11   13.56
   0   0   9   -1.24    5.29
   0   0   9    1.01    3.59
   0   0  -9   -1.45    3.36
   0   0 -10   87.27    5.04
   0   0  10  100.78    5.48
   0   0  10  103.00    7.79
   0   0  11   -3.48    6.31
   0   0  12  173.77    7.11
   0   0  12  200.96   10.29
   0   0  13   -4.14    7.29
   0   0  14  523.98   16.41
   0   0  15   10.29    9.03
   0   0  16  326.69   15.18
   0   0  17   -4.60    8.59
   0   1   1 1296.09    6.70
   0   1  -1 1353.53    5.45
   0  -1   1 1344.90    5.83
   0   1   1 1314.39    5.18
   0  -1   1 1328.26    5.23
   0  -1   2 3340.46   12.07
   0   1   2 3156.34   13.75
   0   1  -2 3290.42   10.53
   0  -1   2 3307.09   12.28
   0  -1  -2 3190.47   10.19
   0   1  -3   10.15    1.75
   0  -1   3   16.40    2.33
   0   1   3   12.35    2.54
   0   1   3   11.54    1.80
   0   1   4 1893.80   11.58
   0  -1   4 1897.63   12.41
   0  -1  -4 1917.41   11.15
   0  -1   4 1838.17   13.58
   0   1  -4 1874.97   10.95
   0   1   4 1856.69   14.51
   0   1  -5 1009.55    9.11
   0  -1   5  964.10   11.47
   0   1   5  976.72   11.92
   0  -1   5 1003.65   10.18
   0   1   5 1000.47    9.52
   0  -1  -5 1002.63    9.02
   0   1  -6  922.63    9.60
   0  -1  -6  944.91    9.56
   0   1   6  895.58    9.88
   0   1   6  877.33   12.45
   0  -1   6  914.07   10.73
   0  -1   6  912.68   12.23
   0   1   7  279.63    8.30
   0  -1   7  264.53    8.09
   0   1   7  275.01    6.37
   0  -1   7  263.30    6.83
   0   1  -7  267.41    6.18
   0  -1  -7  283.94    6.13
   0   1   8  263.87    6.67
   0   1  -8  240.34    6.34
   0  -1   8  263.94    8.65
   0  -1  -8  252.41    6.35
   0  -1   8  246.96    7.08
   0   1   8  253.33    8.93
   0  -1  -9  723.62   10.29
   0  -1   9  684.37   11.33
   0  -1   9  706.57   13.83
   0   1   9  756.21   11.20
   0   1  -9  702.89   10.69
   0   1   9  774.33   14.81
   0  -1 -10 1250.08   13.93
   0   1  10 1203.78   14.50
   0  -1  10 1208.11   18.81
   0  -1  10 1254.88   15.72
   0   1 -10 1181.99   14.07
   0   1  10 1210.51   18.95
   0   1 -11    2.43    3.76
   0   1  11    6.03    3.71
   0  -1  11    3.60    4.16
   0   1  11   -0.78    6.08
   0  -1  12  741.93   16.67
   0  -1  12  729.64   13.16
   0   1  12  775.04   17.50
   0  -1  13   50.29    7.81
   0   1  13   56.79    8.30
   0   1  14    3.54    8.06
   0  -1  14    8.66    7.76
   0   1  15  121.28   11.04
   0  -1  15  134.22   11.25
   0  -1  17   28.98    9.24
   0   1  17    5.63    9.21
   0   2   0 1645.54    6.79
   0   2   0 1660.18    7.41
   0   2   1 1127.90    6.29
   0   2  -1 1156.55    6.38
   0   2   1 1162.07    6.88
   0  -2   1 1152.49    6.50
   0   2   1 1131.64    5.91
   0   2  -2  387.50    4.36
   0   2   2  379.96    5.24
   0  -2  -2  412.84    4.13
   0  -2   2  404.83    4.70
   0  -2   2  393.82    4.16
   0   2   2  402.44    4.19
   0  -2   3 4628.36   17.77
   0   2  -3 4630.09   16.08
   0   2   3 4566.52   15.57
   0  -2   3 4583.06   17.41
   0   2   3 4536.01   20.50
   0  -2   4  121.93    4.04
   0   2   4  111.28    3.26
   0  -2  -4  125.40    3.67
   0   2  -4  112.35    3.44
   0   2   4  134.93    4.68
   0  -2   4  132.39    4.13
   0   2  -5 2156.62   13.64
   0  -2   5 2215.53   16.41
   0  -2  -5 2112.60   13.35
   0  -2   5 2174.77   15.12
   0   2   5 2097.95   13.28
   0   2   5 2260.56   18.01
   0  -2  -6  498.70    7.49
   0   2  -6  478.49    7.34
   0  -2   6  483.74    9.03
   0   2   6  446.77    7.01
   0   2   6  470.28    9.58
   0  -2   6  467.33    8.15
   0  -2  -7  817.68    9.77
   0   2  -7  787.64   10.12
   0  -2   7  821.66   12.59
   0   2   7  856.41   13.74
   0   2   7  815.73   10.02
   0  -2   7  804.92   11.40
   0  -2  -8  795.26   10.31
   0   2   8  801.13   10.61
   0   2   8  799.92   14.20
   0   2  -8  785.96   10.71
   0  -2   8  768.27   13.38
   0  -2   8  822.72   12.21
   0   2   9 1147.38   13.22
   0  -2   9 1105.13   16.99
   0   2  -9 1156.15   13.70
   0  -2  -9 1151.57   12.79
   0  -2   9 1123.99   14.95
   0   2   9 1172.88   17.93
   0   2  10  148.25    8.53
   0  -2  10  135.97    6.55
   0   2 -10  163.22    6.48
   0  -2 -10  144.94    5.65
   0   2  10  158.69    6.05
   0  -2  10  152.37    8.51
   0   2  11  580.42   10.74
   0   2 -11  577.48   11.04
   0  -2  11  586.34   14.67
   0  -2  11  568.15   11.73
   0  -2  12   50.89    5.53
   0  -2  12   58.36    7.72
   0   2  12   51.80    7.88
   0  -2  13  301.34   12.52
   0   2  13  293.45   12.70
   0  -2  14   73.84    9.46
   0   2  14   86.63   10.17
   0  -2  15   17.18    8.23
   0   2  15   21.44    8.50
   0   2  16   48.49   10.18
   0  -2  16   84.23    9.96
   0   2  17  137.48   12.73
   0  -2  17  116.55   11.67
   0   3   0    1.58    1.09
   0   3  -1 8218.88   20.27
   0   3   1 8291.43   20.49
   0   3   1 8170.35   18.52
   0  -3   1 8144.15   19.88
   0   3   1 8067.01   19.78
   0   3   2  686.41    6.06
   0   3   2  695.11    6.14
   0   3   2  673.76    7.28
   0  -3   2  664.38    6.58
   0   3  -2  690.70    6.43
   0  -3   2  674.31    5.49
   0  -3   3 1617.49   11.21
   0  -3   3 1641.07   10.28
   0  -3  -3 1640.17    9.88
   0   3   3 1619.79   10.08
   0   3  -3 1630.70   10.68
   0   3   3 1542.92   12.50
   0  -3   4  323.99    5.76
   0   3   4  328.28    5.17
   0  -3   4  351.54    6.18
   0   3   4  322.27    6.81
   0   3  -4  305.57    5.48
   0  -3  -4  328.03    5.18
   0   3  -5 1642.95   12.91
   0  -3   5 1685.71   14.13
   0  -3  -5 1640.75   12.22
   0  -3   5 1626.60   13.90
   0   3   5 1634.28   15.68
   0   3   5 1602.48   12.03
   0  -3  -6   16.44    3.15
   0   3   6   12.38    2.64
   0   3  -6    8.93    2.80
   0   3   7 2199.91   16.22
   0   3  -7 2285.16   17.42
   0  -3   7 2275.54   20.23
   0  -3   7 2240.19   18.72
   0   3   7 2255.53   21.64
   0  -3   8   88.41    6.31
   0  -3  -8   82.21    4.65
   0   3  -8   90.51    5.03
   0   3   8   87.33    6.75
   0   3   8  100.26    4.76
   0  -3   8   89.40    5.72
   0  -3   9 1241.29   17.64
   0  -3  -9 1256.83   13.38
   0   3  -9 1252.90   14.73
   0  -3   9 1257.52   16.23
   0   3   9 1286.06   18.93
   0   3   9 1339.77   14.41
   0  -3  10    2.80    4.55
   0   3  10    6.09    6.00
   0  -3  10    0.78    5.42
   0  -3  11   15.00    5.78
   0   3  11    9.07    6.48
   0   3 -11   10.53    4.25
   0   3  11   11.85    3.74
   0  -3  12    8.70    6.64
   0  -3  12    4.22    4.94
   0   3  13  463.98   15.56
   0  -3  13  423.13   14.12
   0  -3  15  456.16   15.93
   0   3  15  461.40   17.07
   0  -3  16    9.44    8.80
   0   3  16    5.79    9.29
   0   3  17  101.69   11.91
   0  -3  17  107.28   10.83
   0   4   0 1963.38   10.53
   0   4   0 1995.41   11.48
   0   4   0 1984.41    8.20
   0  -4   1 2822.87    9.62
   0   4   1 2789.64   12.42
   0  -4   1 2749.57   13.26
   0   4   1 2709.38   12.34
   0   4   1 2793.96   13.77
   0   4  -1 2762.41   13.59
   0  -4   2 1641.63   11.15
   0   4  -2 1680.99   11.09
   0   4   2 1673.82   10.63
   0  -4   2 1599.83    8.61
   0   4   2 1647.61   11.67
   0   4   2 1612.00   10.07
   0  -4   3 3837.94   15.49
   0   4   3 3870.78   16.31
   0   4   3 3893.36   16.61
   0   4  -3 3883.40   17.74
   0  -4   3 3788.53   18.29
   0   4   3 3712.55   19.96
   0  -4  -3 3778.57   16.41
   0   4   4    6.60    2.92
   0  -4   4    9.62    2.20
   0  -4   4    8.11    2.77
   0   4   5 3138.87   17.37
   0  -4   5 3183.17   18.97
   0  -4   5 3140.19   19.91
   0   4   5 3137.44   22.34
   0   4  -5 3151.17   18.69
   0  -4  -5 3188.49   17.02
   0   4   6  357.59    9.00
   0   4  -6  335.90    7.02
   0  -4  -6  335.92    6.65
   0   4   6  350.17    6.61
   0  -4   6  348.50    7.90
   0  -4   6  356.43    7.74
   0   4   7   14.15    3.19
   0   4   7   13.22    4.81
   0  -4   7   11.64    4.46
   0  -4   8  454.03   10.12
   0  -4   8  469.52   10.51
   0   4  -8  461.76    9.36
   0   4   8  485.24   11.81
   0  -4  -8  460.47    8.52
   0   4   8  498.58    8.69
   0  -4   9  233.38    8.92
   0  -4  -9  220.73    6.58
   0   4  -9  244.97    7.59
   0  -4   9  248.15    8.42
   0   4   9  237.39    9.71
   0   4   9  225.43    6.53
   0   4 -10   31.36    4.66
   0  -4 -10   21.93    3.94
   0  -4  10   21.45    5.80
   0  -4  10   27.32    5.31
   0   4  10   23.68    3.94
   0  -4  11  681.19   15.31
   0  -4  11  661.58   13.68
   0   4 -11  661.87   12.48
   0   4  12   17.32    7.74
   0  -4  12   15.31    5.49
   0  -4  13  202.52    9.10
   0  -4  13  199.10   10.37
   0  -4  14  264.56   12.70
   0   4  14  256.42   13.29
   0   4  15   -0.50    8.53
   0  -4  15    3.28    7.37
   0  -4  16   85.01   10.41
   0   4  16   50.79    9.90
   0   4  17  116.46   12.36
   0  -4  17  119.01   11.26
   0  -5   0    1.53    1.53
   0   5   0    3.26    1.96
   0   5   1   22.02    2.00
   0   5   1   28.80    2.71
   0   5  -1   26.76    2.68
   0  -5   1   32.95    1.85
   0  -5   1   27.56    2.81
   0   5   1   28.71    2.34
   0   5  -2 2381.17   14.60
   0   5   2 2357.51   14.68
   0  -5   2 2386.12   11.04
   0  -5   2 2370.64   14.51
   0   5   2 2386.28   14.21
   0   5   2 2453.88   13.39
   0  -5   3  673.19    6.87
   0  -5   3  710.24    8.77
   0   5   3  709.53    7.88
   0   5  -3  691.53    8.46
   0   5   3  718.64    7.83
   0   5   3  679.35    9.04
   0  -5  -4 7147.29   25.19
   0   5   4 7130.51   25.46
   0   5  -4 7228.31   27.79
   0  -5   4 7146.41   24.49
   0  -5   4 7131.55   28.60
   0  -5   5  128.87    5.44
   0  -5  -5  126.15    4.29
   0   5   5  136.08    4.47
   0  -5   5  131.46    4.72
   0   5  -5  130.08    4.87
   0   5   5  127.23    5.69
   0  -5   6  345.35    7.58
   0  -5  -6  337.11    6.78
   0   5  -6  340.19    7.46
   0  -5   6  327.25    8.18
   0   5   6  344.53    9.03
   0   5   6  333.87    6.81
   0   5  -7 2529.28   20.05
   0  -5  -7 2586.43   18.53
   0   5   7 2616.48   24.05
   0  -5   7 2555.24   21.44
   0   5   7 2561.66   18.45
   0  -5   8   28.81    5.21
   0   5  -9  231.29    7.77
   0  -5   9  218.97    8.50
   0   5   9  247.33   10.01
   0   5   9  230.44    6.82
   0  -5  -9  223.23    6.92
   0  -5   9  231.22    8.74
   0   5 -10  771.19   13.30
   0   5  10  764.29   11.81
   0   5  10  803.78   16.71
   0  -5  10  757.83   14.35
   0  -5  10  794.20   15.27
   0   5  11   14.69    7.29
   0  -5  11   -3.17    5.96
   0   5 -11   12.74    4.82
   0  -5  11    5.03    5.75
   0   5  12  525.77   15.43
   0  -5  12  522.57   13.29
   0  -5  12  552.80   14.97
   0   5  13   83.38    9.23
   0  -5  13   80.07    8.76
   0  -5  13   67.87    7.15
   0  -5  14   64.00    8.76
   0   5  14   80.08   10.24
   0  -5  15   98.09   10.21
   0   5  15   99.63   10.84
   0   5  16   76.60   11.31
   0  -5  16   64.93    9.66
   0  -5  17    9.93    8.56
   0   6   0  497.36    6.88
   0  -6   0  547.02    5.57
   0  -6   1  280.60    3.99
   0   6  -1  289.07    5.81
   0   6   1  268.25    4.75
   0   6   1  277.34    5.25
   0   6   1  283.10    5.74
   0  -6   1  282.67    5.71
   0   6  -2 8078.93   29.24
   0   6   2 8176.69   26.56
   0   6   2 8247.52   28.70
   0  -6   2 8148.17   28.80
   0   6   2 8159.31   27.90
   0  -6   2 8282.07   21.43
   0   6  -3  130.34    4.76
   0  -6   3  136.08    3.66
   0   6   3  135.66    5.01
   0  -6   3  135.20    4.93
   0   6   3  132.68    4.06
   0   6   3  131.73    4.25
   0   6   4  280.80    7.10
   0   6  -4  304.13    6.73
   0   6   4  304.40    6.02
   0  -6   4  294.55    6.97
   0  -6   4  294.24    5.44
   0   6   4  291.25    6.06
   0  -6  -4  300.12    6.12
   0  -6   5    6.84    2.78
   0  -6  -5    6.45    2.77
   0  -6   5   11.70    3.90
   0   6  -5    5.29    3.21
   0   6   5   11.30    3.90
   0  -6   6 1106.30   14.25
   0   6   6 1120.79   12.12
   0   6  -6 1068.77   13.29
   0  -6  -6 1090.79   11.90
   0  -6   6 1149.85   12.92
   0   6   6 1131.81   15.45
   0   6  -7   26.81    4.45
   0   6   7   27.77    5.60
   0   6   7   24.01    3.52
   0  -6   7   33.51    5.51
   0  -6  -7   24.04    3.85
   0  -6   8 2025.10   20.83
   0  -6   8 2092.51   20.69
   0   6   8 2091.36   18.08
   0   6   8 2166.41   24.15
   0  -6  -8 2073.33   17.97
   0   6  -8 2071.39   19.95
   0   6  -9    0.39    4.39
   0  -6   9    3.34    4.66
   0  -6   9    1.51    5.35
   0   6   9    9.51    6.15
   0  -6  -9   -0.71    4.13
   0   6   9    3.41    3.45
   0   6  10  114.36    8.83
   0   6 -10  112.47    6.78
   0  -6  10  108.56    7.28
   0  -6  10  110.01    7.60
   0   6  10  116.06    5.69
   0   6 -11   12.40    4.88
   0  -6  11   14.89    5.67
   0  -6  11   18.74    6.22
   0   6  11   33.82    7.62
   0   6 -12  106.97    7.18
   0  -6  12  120.47    8.71
   0   6  12  130.97   10.05
   0  -6  12  119.20    8.57
   0  -6  13   16.13    6.99
   0   6  13   18.42    8.50
   0  -6  13   11.73    6.13
   0   6  14  599.13   18.88
   0  -6  14  570.00   16.40
   0   6  15   -0.37    8.91
   0  -6  15  -13.44    8.13
   0   6  16  177.18   13.42
   0  -6  16  212.48   12.79
   0  -7   0    4.40    1.77
   0   7   0    4.42    2.48
   0   7   0   -0.72    2.42
   0   7   1 1497.34   12.37
   0   7   1 1448.75   13.10
   0   7  -1 1470.25   13.29
   0  -7   1 1529.85    9.25
   0  -7   1 1485.87   13.05
   0   7   1 1431.83   10.65
   0  -7   2 1637.48   14.19
   0   7   2 1699.87   13.52
   0  -7   2 1700.99   10.41
   0   7  -2 1708.04   14.76
   0   7   2 1704.10   13.22
   0   7   2 1691.78   14.24
   0  -7   3 1122.76    9.27
   0  -7   3 1132.66   12.49
   0   7   3 1139.81   12.40
   0   7  -3 1169.23   12.52
   0   7   3 1170.16   11.17
   0   7   3 1103.48   11.45
   0   7   4 3448.10   20.42
   0   7   4 3505.44   19.81
   0   7   4 3451.75   23.57
   0  -7   4 3477.17   17.75
   0  -7   4 3446.62   22.45
   0   7  -4 3489.86   22.18
   0  -7   5   51.95    5.09
   0   7  -5   40.30    4.19
   0   7   5   43.72    4.89
   0  -7  -5   46.74    3.88
   0  -7   5   48.86    3.67
   0   7   5   38.59    3.44
   0   7   6  580.42   11.80
   0  -7   6  594.50   11.36
   0   7  -6  582.84   10.64
   0   7   6  623.87    9.52
   0  -7  -6  608.12    9.51
   0  -7   6  594.83    9.63
   0  -7   7  715.98   13.02
   0  -7  -7  763.72   10.99
   0   7   7  743.98   14.00
   0   7  -7  726.85   12.43
   0  -7   7  775.89   11.87
   0   7   7  805.51   11.32
   0   7   8   95.20    7.57
   0  -7  -8   94.69    5.54
   0   7  -8   91.32    6.23
   0   7   8   97.84    5.14
   0  -7   8  101.91    6.32
   0  -7   8  101.22    7.16
   0   7   9   95.72    8.14
   0  -7   9   80.48    6.94
   0   7   9   84.87    4.96
   0  -7   9   76.64    6.23
   0  -7  -9   93.33    5.73
   0   7  -9   79.40    6.33
   0  -7  10  741.44   14.85
   0   7  10  758.73   16.97
   0   7  10  718.82   11.69
   0   7 -10  759.52   14.45
   0  -7  10  760.94   15.45
   0   7  11    9.65    7.50
   0   7 -11   -2.69    5.63
   0  -7  12  463.42   13.71
   0   7  12  471.22   15.48
   0   7 -12  516.35   13.44
   0  -7  12  473.92   13.73
   0  -7  13  261.86   11.76
   0   7  13  257.49   13.42
   0   7  14  128.57   11.49
   0  -7  14  108.55    9.50
   0  -7  15   61.27    9.09
   0   7  15   77.54   10.51
   0   7  16   94.04   11.92
   0   8   0  396.81    7.78
   0  -8   0  411.10    5.71
   0   8   0  395.97    7.32
   0  -8   1  455.78    8.29
   0   8  -1  454.33    8.26
   0   8   1  444.49    7.66
   0   8   1  425.10    6.37
   0  -8   1  448.63    5.65
   0   8   1  458.77    8.17
   0   8   2 1038.90   11.21
   0   8   2  993.41   10.82
   0  -8   2  976.74   11.95
   0   8  -2 1005.00   12.31
   0  -8   2 1022.55    8.69
   0   8   2 1026.56   12.02
   0   8  -3 2982.05   21.15
   0  -8   3 2981.05   15.52
   0   8   3 3054.01   20.05
   0   8   3 3087.41   19.09
   0  -8   3 3004.30   21.19
   0   8   3 3031.85   20.68
   0   8   4  426.23    8.97
   0  -8   4  413.12    8.95
   0   8   4  433.64    7.83
   0   8  -4  397.38    8.86
   0   8   4  402.85    7.92
   0  -8   4  407.36    6.73
   0   8   5 3019.67   20.05
   0  -8  -5 2890.19   20.18
   0  -8   5 2907.94   23.09
   0   8   5 2866.55   24.04
   0   8  -5 2907.84   22.59
   0  -8   5 2995.59   18.41
   0  -8   6  649.06   10.00
   0  -8  -6  641.60   10.20
   0   8   6  653.05   10.09
   0   8   6  620.79   12.64
   0   8  -6  638.16   11.66
   0  -8   6  633.41   12.10
   0  -8  -7   27.31    4.36
   0   8   7   36.23    5.92
   0  -8   7   25.48    6.03
   0   8  -7   22.70    5.00
   0  -8   7   33.78    4.39
   0   8   7   17.12    3.68
   0   8  -8  222.56    8.42
   0   8   8  230.02    6.87
   0   8   8  233.68    9.93
   0  -8   8  204.78    9.16
   0  -8  -8  200.19    7.00
   0  -8   8  213.16    7.66
   0  -8  -9  101.55    5.97
   0  -8   9   99.65    7.59
   0   8  -9  105.27    6.89
   0  -8   9  118.94    6.97
   0   8   9  112.58    5.62
   0   8   9  113.96    8.71
   0   8  10  119.09    9.28
   0  -8  10  128.95    7.58
   0  -8  10  105.55    8.47
   0   8 -10  112.12    7.55
   0  -8  11 1051.99   18.29
   0  -8  11 1022.84   18.94
   0   8  11 1108.56   21.56
   0   8 -11 1059.95   18.31
   0   8  12   15.82    8.25
   0  -8  13  188.46   10.60
   0  -8  13  184.32   10.58
   0   8  14   93.22   11.34
   0  -8  14   71.04    8.54
   0   8  15   -2.16    9.59
   0   8  16   -2.43   10.19
   0   9   0   -0.03    3.18
   0  -9   0    0.65    2.13
   0   9   1 2379.56   17.88
   0  -9   1 2381.36   13.23
   0  -9   1 2314.41   18.71
   0   9  -1 2297.63   18.76
   0   9   1 2343.16   18.91
   0   9   1 2289.59   14.94
   0   9   2   26.28    3.88
   0  -9   2   28.19    4.36
   0   9   2   23.05    3.25
   0   9   2   32.50    3.66
   0  -9   2   20.54    2.62
   0   9   3   24.39    3.72
   0   9  -3   22.29    4.31
   0  -9   3   20.55    2.93
   0   9   4   68.28    5.14
   0  -9   4   57.93    3.61
   0   9  -4   60.26    5.24
   0  -9   4   75.57    5.85
   0   9   4   55.16    4.54
   0   9   4   67.47    4.35
   0  -9   5  838.61   13.60
   0   9   5  829.04   11.54
   0   9   5  848.64   13.74
   0   9   5  863.65   11.49
   0  -9  -5  833.07   11.82
   0   9  -5  860.20   13.47
   0  -9   5  868.66   10.38
   0   9   6    9.34    3.47
   0   9   6    9.12    4.87
   0  -9  -6    6.22    3.83
   0   9  -6    3.13    4.86
   0  -9   6    1.92    3.31
   0  -9   7 2413.11   20.51
   0   9  -7 2398.11   23.45
   0   9   7 2453.90   25.87
   0  -9  -7 2465.22   20.53
   0   9   7 2517.01   20.37
   0  -9   7 2459.59   24.45
   0   9   8   43.41    4.44
   0  -9   8   37.49    4.88
   0   9   8   44.90    7.09
   0   9  -8   38.10    5.97
   0  -9  -8   39.33    4.71
   0  -9   8   35.47    6.84
   0   9   9  550.11   10.45
   0   9  -9  574.43   13.48
   0   9   9  591.23   15.11
   0  -9  -9  544.54   11.05
   0  -9   9  551.01   13.72
   0  -9   9  569.81   12.22
   0  -9  10   -2.84    5.48
   0  -9  10   -4.05    6.91
   0   9 -10   -0.94    5.73
   0   9  10    5.29    7.33
   0   9 -11   42.65    6.77
   0   9  11   49.21    8.71
   0  -9  11   42.87    8.03
   0  -9  12   -5.08    7.41
   0   9  13  332.04   15.01
   0  -9  13  267.21   12.14
   0  -9  14    7.41    7.57
   0   9  14    9.17    9.08
   0   9  15  346.11   16.47
   0   9  16    6.75    9.98
   0 -10   0  985.13   13.07
   0  10   0  994.78   12.87
   0 -10   0  988.16    9.72
   0  10   0  954.66   13.12
   0  10   1   43.55    3.24
   0  10   1   45.69    4.22
   0  10   1   56.46    4.81
   0 -10   1   51.96    3.13
   0  10  -1   40.32    4.57
   0 -10  -1   42.91    3.57
   0 -10   1   45.91    5.02
   0  10  -2  356.87    8.86
   0  10   2  370.08    8.25
   0  10   2  351.21    8.35
   0 -10   2  360.46    6.10
   0  10   2  353.43    7.21
   0 -10   2  341.04    8.80
   0  10   3 2754.03   21.59
   0  10   3 2803.67   20.80
   0  10  -3 2716.43   23.08
   0 -10   3 2712.91   22.62
   0  10   3 2722.57   20.68
   0 -10   3 2697.25   16.27
   0  10   4   79.51    5.22
   0  10  -4   78.13    6.10
   0 -10   4   99.55    6.71
   0 -10   4   89.93    4.21
   0  10   4   93.57    5.65
   0  10   4   98.36    5.16
   0 -10   5 1185.82   16.70
   0  10   5 1203.18   14.29
   0 -10   5 1228.23   12.38
   0  10   5 1202.23   16.58
   0  10  -5 1223.69   16.79
   0  10   5 1192.06   14.54
   0 -10   6  702.74   10.57
   0  10  -6  674.30   13.29
   0  10   6  680.59   11.28
   0 -10   6  652.08   13.45
   0 -10  -6  638.77   11.21
   0  10   6  637.42   13.14
   0 -10   7   54.13    4.73
   0  10   7   42.67    4.52
   0  10   7   49.50    6.56
   0  10  -7   45.00    6.09
   0 -10  -7   42.97    4.99
   0 -10   7   47.36    7.04
   0  10   8  376.86    8.85
   0  10  -8  347.78   10.99
   0  10   8  367.54   12.18
   0 -10   8  345.90    9.25
   0 -10   8  373.68   12.15
   0 -10  -8  387.06    9.53
   0  10  -9  297.27   10.83
   0  10   9  296.57    8.29
   0  10   9  312.00   12.17
   0 -10  -9  279.15    8.76
   0 -10   9  293.53   11.53
   0 -10   9  314.54    9.59
   0  10 -10  139.77    9.14
   0 -10  10  127.17    7.83
   0 -10  10  170.69   10.14
   0  10  10  164.49   10.70
   0  10  11  807.70   19.39
   0 -10  11  764.79   18.04
   0  10 -11  747.52   17.35
   0 -10  11  765.05   16.16
   0  10  12   52.08    9.61
   0 -10  12   47.72    8.82
   0  10  13  145.41   12.17
   0 -10  13  169.06   11.30
   0 -10  14   53.79    9.29
   0  10  15    0.89   10.07
   0  11   0    0.69    4.23
   0 -11   0   -2.20    4.53
   0  11   0   -2.85    4.19
   0 -11   1   83.35    3.84
   0  11  -1   85.79    5.74
   0 -11  -1   88.87    4.38
   0 -11   1   85.80    6.09
   0  11   1   82.14    5.71
   0  11   1   89.50    5.51
   0  11   2 1721.03   18.31
   0 -11   2 1747.91   13.19
   0  11   2 1715.00   15.37
   0  11   2 1752.74   17.47
   0 -11   2 1749.35   18.89
   0  11  -2 1735.00   18.86
   0 -11   3   17.07    3.19
   0  11   3   21.07    4.09
   0 -11   4  761.34    9.56
   0  11   4  733.75   12.36
   0  11   4  779.91   12.69
   0  11  -4  772.33   14.13
   0 -11   4  743.27   13.68
   0  11   4  800.19   12.26
   0  11   5  891.99   13.63
   0 -11   5  915.38   10.98
   0  11   5  883.89   14.85
   0  11   5  931.01   13.24
   0 -11   5  884.87   15.43
   0  11  -5  896.49   15.40
   0 -11  -6 1208.98   15.69
   0  11  -6 1259.07   18.61
   0  11   6 1230.32   15.30
   0  11   6 1180.11   17.89
   0 -11   6 1233.03   13.76
   0 -11   6 1247.82   18.57
   0  11   7  518.76   10.43
   0 -11  -7  522.42   10.96
   0 -11   7  529.64   10.26
   0 -11   7  519.35   13.32
   0  11   7  515.75   13.25
   0  11  -7  501.49   13.06
   0  11  -8  173.82    9.02
   0  11   8  212.69    7.32
   0 -11   8  194.24    7.39
   0  11   8  174.78    9.45
   0 -11   8  166.42    9.48
   0 -11  -8  194.31    7.73
   0  11   9  312.28    8.63
   0 -11   9  353.34   12.63
   0  11  -9  347.51   11.86
   0 -11   9  313.64    9.68
   0  11   9  327.82   12.59
   0  11 -10  592.98   15.50
   0 -11  10  541.97   15.56
   0  11  10  582.57   16.50
   0  11  11    5.13    8.23
   0 -11  11   -0.53    8.23
   0  11 -12  487.22   15.61
   0  11  12  497.61   17.18
   0 -11  13   18.64    8.19
   0 -12   0 4770.30   22.96
   0  12   0 4690.89   31.12
   0 -12   0 4767.02   30.96
   0 -12   1    5.54    5.34
   0  12  -1    5.17    5.00
   0  12   1    6.08    4.66
   0 -12   1    6.36    3.05
   0  12   2  586.76   11.44
   0  12   2  580.76   11.79
   0  12   2  620.75    9.94
   0 -12   2  609.34    8.51
   0  12  -2  558.06   12.06
   0 -12   2  565.63   12.18
   0 -12   3   34.90    3.68
   0 -12   3   36.18    6.53
   0  12  -3   39.57    6.04
   0  12   3   44.59    4.65
   0  12   3   45.79    5.46
   0  12   3   33.03    4.81
   0  12   4    4.42    4.13
   0 -12   4   15.72    3.34
   0  12   4    8.44    4.45
   0 -12   4   14.21    6.28
   0  12   4   11.21    4.25
   0  12  -4   14.60    5.50
   0  12  -5    8.58    5.72
   0 -12   5    7.91    6.78
   0  12   5   -2.79    4.81
   0  12   5   -0.46    4.57
   0  12  -6 1453.50   20.80
   0  12   6 1483.43   17.44
   0  12   6 1447.62   20.26
   0 -12   6 1490.77   15.21
   0 -12  -6 1451.40   17.83
   0 -12   6 1440.08   20.62
   0 -12   7   46.59    7.73
   0  12   7   64.52    7.40
   0 -12  -7   63.11    5.72
   0 -12   7   62.56    4.94
   0  12  -7   60.18    6.99
   0  12   8  762.89   13.03
   0  12   8  714.38   16.59
   0  12  -8  743.13   16.76
   0 -12  -8  767.59   13.66
   0 -12   8  746.62   16.99
   0 -12   9   16.10    7.49
   0  12  -9   10.89    6.78
   0  12   9   17.68    7.25
   0  12 -10  450.26   14.77
   0  12  10  487.88   15.59
   0 -12  10  478.42   15.72
   0  12 -11   14.95    7.66
   0 -12  11   14.69    8.20
   0  12  11    0.83    8.30
   0 -12  12  137.99   11.63
   0  12 -12  134.85   10.42
   0  12  12  142.28   11.67
   0 -12  13  -11.17    8.83
   0  12  13   14.43    8.96
   0  12  14  189.15   13.87
   0 -12  14  183.01   12.81
   0  12  15   -1.16   10.38
   0  13  -1  781.22   14.26
   0  13   1  823.48   14.33
   0 -13  -1  798.82   13.97
   0 -13   1  832.80   10.11
   0 -13  -1  773.09   10.80
   0  13   1  788.97   13.59
   0 -13   1  813.00   14.69
   0 -13   2  907.70   15.63
   0  13   2 1013.51   15.15
   0  13  -2  995.00   16.24
   0 -13   2  969.90   11.06
   0  13   2  940.04   15.03
   0 -13  -2  927.04   12.75
   0  13   2  901.06   12.03
   0  13   3   36.29    5.42
   0 -13   3   34.78    7.03
   0  13   3   31.54    5.34
   0  13  -3   40.56    6.28
   0  13   3   38.88    4.53
   0 -13   3   38.28    3.88
   0 -13   4 1088.31   17.81
   0  13   4 1089.55   15.61
   0 -13   4 1071.21   11.83
   0  13   4 1037.17   15.49
   0  13  -4 1116.78   17.97
   0  13   4 1095.56   15.67
   0  13   5   99.21    6.20
   0  13   5  107.63    6.99
   0 -13   5   97.36    4.72
   0  13   5  105.72    6.52
   0  13  -5  121.77    8.26
   0 -13   5   99.93    8.37
   0 -13  -6  163.84    7.60
   0  13   6  176.80    8.82
   0  13   6  181.26    7.52
   0 -13   6  176.70   10.03
   0  13   6  165.70    7.47
   0  13  -6  172.67    9.26
   0  13   7  371.67   12.08
   0  13   7  389.92   10.06
   0  13  -7  390.33   12.77
   0 -13  -7  376.39   10.42
   0 -13   7  343.30   12.63
   0  13  -8  132.55    9.30
   0  13   8  104.51    6.37
   0  13   8  122.62    9.23
   0 -13   8  130.38   10.10
   0 -13  -8  115.60    6.99
   0  13   9  327.89   13.31
   0  13  -9  306.91   12.60
   0 -13   9  332.93   13.59
   0 -13  10  441.71   15.70
   0  13 -10  434.80   15.18
   0  13  10  482.92   16.21
   0 -13  11    4.10    8.64
   0  13  11    9.70    8.24
   0  13  12  370.75   16.10
   0  13 -12  330.07   14.42
   0 -13  13   12.87    9.12
   0  13  13    5.31   10.04
   0 -13  14   23.95    8.65
   0  13  14   -2.62   10.05
   0 -14   0  769.09   10.55
   0 -14   0  763.43   14.95
   0  14   0  772.59   14.81
   0 -14  -1   88.11    4.99
   0 -14   1   76.72    7.34
   0 -14  -1   72.00    6.82
   0 -14   1   87.07    4.64
   0  14   1   85.44    7.03
   0  14  -1   81.76    7.20
   0 -14  -2  103.74    7.10
   0 -14   2   85.91    7.71
   0  14   2  111.56    7.51
   0 -14  -2   91.97    5.44
   0  14  -2   99.87    7.53
   0 -14   2   96.44    4.78
   0  14   2   96.12    6.88
   0  14  -3 1751.27   22.32
   0 -14   3 1792.10   15.36
   0  14   3 1792.35   21.32
   0 -14   3 1796.40   22.93
   0  14   3 1832.79   18.94
   0 -14   4   10.34    7.11
   0  14   4    9.81    4.52
   0  14  -4    0.32    6.20
   0  14   4    6.80    4.77
   0  14   4   10.54    5.01
   0  14   5  367.55   10.76
   0 -14   5  332.12   12.14
   0  14   5  340.95   10.15
   0  14  -5  349.25   12.03
   0  14   5  351.42   10.01
   0 -14   6  249.33   11.45
   0  14  -6  233.90   10.87
   0  14   6  264.06    9.16
   0 -14  -6  250.23    9.17
   0  14   6  255.96   10.01
   0  14   6  244.95    8.82
   0 -14   7   97.96    9.29
   0  14   7  118.47    7.04
   0  14  -7  107.03    8.90
   0 -14  -7   94.29    6.82
   0  14   7  106.28    8.37
   0  14  -8  300.29   12.48
   0 -14  -8  282.88    9.90
   0 -14   8  302.09   12.86
   0  14   8  288.90   11.90
   0 -14   9  403.32   15.01
   0  14   9  434.40   14.94
   0  14  -9  450.50   15.07
   0  14  10    9.71    8.08
   0  14  11  447.04   16.49
   0  14 -11  414.63   15.67
   0 -14  11  418.84   16.25
   0  14 -12    3.88    8.15
   0 -14  12   14.08    9.52
   0  14  13  126.56   12.57
   0 -14  13  128.40   12.02
   0 -14  14   26.68    9.32
   0 -15   0    0.58    6.20
   0 -15   0    1.67    3.50
   0  15   1 1265.99   18.87
   0 -15   1 1282.25   19.63
   0  15  -1 1305.88   19.57
   0 -15   1 1312.39   13.70
   0 -15  -1 1285.85   19.10
   0  15   2   45.76    6.41
   0 -15  -2   49.91    6.38
   0  15  -2   47.03    7.00
   0  15   2   48.87    6.33
   0 -15  -2   52.18    5.03
   0 -15   2   47.27    7.61
   0  15   3  128.95    6.45
   0 -15   3  119.09    9.01
   0  15   3  129.46    7.86
   0 -15  -3  147.44    6.95
   0  15   3  125.76    8.01
   0  15  -3  152.48    9.21
   0  15  -4    6.30    6.49
   0  15   4   -1.83    5.43
   0  15   4    5.04    5.37
   0  15   4    4.62    4.67
   0 -15   4    4.13    7.03
   0  15   5  240.50    9.34
   0  15   5  270.99    9.82
   0  15  -5  243.19   11.13
   0 -15   5  246.51   11.38
   0  15   5  268.16    9.70
   0  15  -6  107.57    9.42
   0  15   6  116.97    7.41
   0  15   6  110.88    7.07
   0 -15  -6  133.53    7.76
   0  15   6  121.14    8.14
   0 -15   6  115.34   10.06
   0  15   7 1012.66   19.03
   0  15   7  978.28   16.38
   0 -15  -7  979.94   16.93
   0 -15   7 1050.37   21.27
   0  15  -7 1009.45   20.52
   0  15  -8    8.90    7.59
   0  15   8    2.55    4.70
   0 -15  -8    4.89    5.68
   0  15   8    5.30    6.99
   0 -15   8    2.93    8.82
   0  15   9  579.57   16.73
   0  15  -9  593.41   17.62
   0 -15  10   -3.57    9.16
   0  15  10   15.97    8.60
   0  15 -10    3.49    8.30
   0 -15  11   15.93    9.36
   0  15  11   -0.42    8.71
   0  15 -11   -7.21    8.40
   0  15  12   18.62    9.41
   0 -15  12   -2.10    9.21
   0  15 -12    9.13    8.40
   0 -15  13   92.77   11.56
   0  15  13  138.45   12.59
   0 -15  14   14.48    9.55
   0 -16   0  113.31    8.64
   0 -16   0  111.52    5.42
   0  16   0  120.07    8.65
   0  16   1  505.80   13.35
   0 -16  -1  474.82   13.52
   0 -16  -1  507.70    9.97
   0  16  -1  549.03   14.07
   0 -16   1  517.48   14.38
   0  16  -2   36.14    6.87
   0 -16   2   43.22    7.99
   0  16   2   40.85    6.45
   0 -16  -2   38.29    4.80
   0 -16  -2   45.60    6.83
   0 -16  -3  574.66   11.90
   0  16   3  538.44   13.19
   0 -16   3  514.40   14.78
   0 -16  -3  570.51   13.69
   0  16   3  566.27   13.55
   0  16  -3  565.78   14.79
   0  16   4   55.58    6.17
   0 -16   4   67.56    8.72
   0  16  -4   73.61    8.29
   0  16   4   67.37    7.07
   0  16   4   56.79    6.89
   0  16   5  549.89   13.26
   0  16   5  542.77   13.40
   0  16   5  556.75   13.08
   0 -16   5  513.16   15.50
   0  16  -5  543.53   15.33
   0  16   6  335.82   11.09
   0  16   6  360.19   11.98
   0 -16   6  331.68   13.84
   0  16   6  330.84   10.95
   0  16  -6  367.08   13.85
   0  16   7   38.25    6.18
   0  16   7   18.36    6.83
   0 -16   7   17.26    9.28
   0 -16  -7   30.41    6.41
   0  16  -7   29.70    7.93
   0 -16   8  399.24   15.49
   0  16  -8  379.44   14.65
   0  16   8  361.92   13.63
   0 -16   9  262.94   14.89
   0  16  -9  285.80   13.65
   0  16 -10   75.30   10.54
   0  16  10   77.23    9.48
   0 -16  10   67.92   11.61
   0  16  11  175.98   12.10
   0 -16  11  207.45   14.07
   0  16 -11  183.62   12.74
   0  16  12   11.39    9.21
   0 -16  12    3.72    9.79
   0  16  13   94.30   11.39
   0 -16  13   74.80   11.58
   0 -17   0   13.74    7.19
   0  17   0    3.21    6.45
   0 -17  -1  129.13    8.90
   0  17   1  116.06    8.68
   0 -17   1  143.56    9.86
   0  17  -1  115.01    9.10
   0 -17   2  524.68   15.18
   0 -17  -2  470.89   13.66
   0 -17  -2  522.31   10.97
   0  17   2  483.84   13.44
   0  17  -2  492.19   14.48
   0 -17  -3   10.28    4.79
   0  17  -3    1.19    6.99
   0 -17  -3    4.62    6.53
   0  17   3    9.89    6.36
   0 -17   3    0.29    7.99
   0 -17  -4  955.92   16.42
   0  17  -4 1037.03   20.54
   0  17   4 1008.73   16.10
   0  17   4 1000.12   18.09
   0 -17  -4  995.34   18.53
   0 -17   4 1032.63   20.88
   0  17   4  996.43   18.10
   0 -17   5  132.05   10.94
   0  17   5  137.05    8.87
   0  17   5  141.84    8.70
   0  17   5  140.16    8.16
   0  17  -5  155.21   10.65
   0  17   6  172.75    9.14
   0  17  -6  157.82   11.23
   0  17   6  138.09    8.56
   0 -17   6  156.00   11.70
   0  17   6  161.28    9.06
   0 -17  -7  120.15    8.29
   0  17   7  128.00    8.26
   0  17   7  115.90    9.19
   0  17  -7  122.45   10.60
   0 -17   7  122.19   11.43
   0  17   8    3.17    7.37
   0 -17   8   23.53    9.73
   0  17  -8   10.92    8.60
   0  17   9   73.44    9.68
   0  17  -9   70.39   10.17
   0 -17   9   70.98   11.81
   0  17  10  272.36   13.87
   0  17 -10  247.68   14.37
   0 -17  10  254.00   15.12
   0 -17  11    8.68   10.55
   0  17 -11  -11.56    9.57
   0  17  11   -6.20    8.63
   0 -17  12  157.42   13.70
   0  17 -12  146.82   12.75
   0  17  12  155.50   12.57
   0 -17  13   32.93   10.67
   0  18   0  675.99   16.28
   0 -18   0  702.11   17.20
   0  18   1   -1.87    6.72
   0 -18  -1   -3.03    6.86
   0 -18   1   -0.14    7.84
   0  18  -1   -4.03    6.85
   0  18  -2  524.44   15.51
   0  18   2  506.64   14.14
   0 -18  -2  498.58   14.88
   0 -18   2  503.33   15.93
   0 -18  -3    2.67    7.10
   0 -18   3    3.56    8.32
   0  18   3    6.46    6.77
   0  18  -3   -0.48    7.71
   0 -18  -4   84.51    8.28
   0 -18  -4   92.97    7.23
   0  18  -4   84.65    9.75
   0  18   4   94.45    8.52
   0 -18   4   89.75   10.53
   0  18   5   15.70    6.48
   0  18   5   19.35    5.61
   0  18  -5   19.21    8.60
   0 -18  -5   12.47    6.94
   0  18   6  336.50   11.77
   0  18  -6  371.21   15.20
   0 -18  -6  374.85   12.68
   0  18   6  376.00   12.48
   0 -18   6  382.47   15.87
   0  18   6  396.72   12.71
   0  18   7   24.57    6.70
   0 -18  -7   27.17    6.78
   0  18   7   17.43    6.14
   0  18  -7   22.30    8.83
   0  18  -8  776.91   21.62
   0  18   8  817.39   18.94
   0  18   9   -2.59    7.38
   0  18  -9    6.82    9.03
   0 -18   9   -9.27   11.09
   0 -18  10    7.71   10.66
   0  18 -10   30.73    9.84
   0  18 -11    7.60    9.33
   0 -18  11    7.67   10.69
   0  18  11   10.68    8.75
   0 -18  12    0.57   11.02
   0  18  12    7.32    9.45
   0  18 -12    7.69    9.49
   0  19   0    2.00    7.27
   0 -19   0    6.95    7.88
   0  19   1  188.78   10.77
   0 -19   1  224.65   12.34
   0  19  -1  189.35   11.14
   0 -19  -1  228.19   11.90
   0  19  -2  270.13   13.00
   0  19   2  285.86   12.09
   0 -19   2  278.27   13.60
   0 -19  -2  261.94   12.10
   0  19  -3  105.25   10.47
   0 -19   3   98.89   10.93
   0 -19  -3   96.39    9.37
   0  19   3   99.64    8.97
   0 -19  -4  600.40   16.45
   0  19  -4  555.41   17.16
   0  19   4  588.78   15.23
   0 -19   4  606.89   18.53
   0  19   5   70.61    7.97
   0 -19  -5   69.24    8.31
   0  19  -5   64.08    9.69
   0 -19  -6  121.79    8.98
   0  19   6  140.53    9.25
   0 -19  -6  114.66    8.96
   0  19  -6  121.34   11.57
   0 -19  -6  140.64    9.86
   0  19   6  117.04    8.42
   0 -19   6  108.76   11.63
   0  19  -7  177.36   12.61
   0 -19  -7  192.69   10.27
   0 -19   7  166.63   14.05
   0  19   7  178.77   10.28
   0 -19   8    9.30   10.45
   0  19  -8    0.16    8.76
   0  19  -9   24.45    9.54
   0  19   9   47.80    8.45
   0  19  10  165.01   11.52
   0 -19  10  183.81   14.52
   0  19 -10  210.45   14.50
   0  19  11   17.00    8.53
   0 -19  11   28.45   11.46
   0  19 -12  125.92   13.38
   0  19  12   94.03   10.70
   0  20   0  235.72   12.13
   0 -20   0  256.41   13.24
   0 -20  -1  205.29   11.97
   0 -20   1  205.33   12.51
   0  20  -1  231.28   12.22
   0  20   1  207.88   11.63
   0  20  -2   26.13    8.50
   0  20   2   42.29    8.26
   0 -20   3  250.83   14.05
   0  20   3  225.71   11.61
   0  20  -3  209.46   12.53
   0 -20  -3  249.60   12.46
   0 -20  -4   -0.35    7.38
   0  20   4    6.94    7.34
   0  20  -4    2.69    8.73
   0 -20   5  550.22   18.83
   0  20  -5  513.48   17.67
   0  20   5  536.05   15.73
   0 -20  -5  508.03   15.82
   0 -20   6   29.02   10.62
   0  20   6   25.76    7.00
   0  20  -6   31.01    9.59
   0 -20   7  -13.83   11.06
   0  20  -7   12.09    9.95
   0 -20   8   33.94   11.26
   0  20   9   63.34    9.11
   0  20  -9   76.50   11.79
   0  20  10    8.73    7.65
   0 -20  10    9.57   11.92
   0  20 -10    4.77    9.35
   0  20  11  201.83   12.65
   0  20 -11  207.55   15.21
   0 -20  11  218.96   16.39
   0  21   0   -8.13    7.95
   0 -21   0  -18.61    9.30
   0  21  -1  545.37   17.75
   0 -21  -1  542.52   17.58
   0  21   1  531.21   16.63
   0 -21   1  540.09   18.19
   0 -21   2    5.34    9.57
   0  21   2    3.31    7.78
   0  21  -2  -18.72    9.47
   0 -21  -2    6.78    8.42
   0 -21  -3  104.55   10.39
   0  21  -3   87.66   10.90
   0  21   3   80.91    9.36
   0 -21   3  105.56   12.06
   0 -21   5  138.34   13.40
   0  21  -5  160.77   13.04
   0  21   5  131.51    9.96
   0 -21  -5  143.08   10.72
   0  21  -6   -5.36    9.93
   0 -21  -6    8.19    6.77
   0 -21   6  -11.75   11.31
   0 -21   7  294.50   16.99
   0  21  -7  311.42   16.36
   0 -21   8    0.49   11.24
   0 -21   9  142.45   15.10
   0  21  -9   84.47   12.21
   0  21 -10    1.33   10.45
   0 -21  10   15.45   11.68
   0 -22   0  175.10   13.18
   0  22   0  145.10   11.70
   0  22   1   45.55    9.26
   0  22  -1   54.16    9.69
   0 -22  -1   21.92    9.61
   0 -22   1   31.50   10.21
   0  22  -2   55.33   10.40
   0 -22  -2   35.09    9.06
   0 -22   2   25.67   10.11
   0  22   3  325.53   13.64
   0 -22   3  320.33   15.91
   0 -22  -3  292.40   14.02
   0  22  -3  297.86   14.91
   0 -22   4    1.82   10.36
   0  22   4    8.59    7.97
   0  22  -4   -8.03    9.72
   0 -22   5  159.09   14.12
   0  22  -5  173.35   13.64
   0 -22  -5  159.65   11.60
   0  22   5  176.45   11.06
   0  22  -6  107.04   12.39
   0 -22  -6   78.01    8.83
   0 -22   6   90.67   13.57
   0  22   6   77.04    8.66
   0 -22   7    0.09   10.75
   0  22  -7   -4.29    9.99
   0  22  -8  107.41   12.69
   0 -22   8  127.91   14.27
   0  22  -9   73.95   12.58
   0  23   0    4.15    8.71
   0 -23   0    2.72    9.75
   0 -23   1   50.34   11.64
   0  23  -1   42.52   10.09
   0  23   1   66.34    9.97
   0 -23  -1   66.41   10.61
   0  23  -2  170.71   12.67
   0 -23   2  173.29   13.68
   0 -23  -2  185.33   13.23
   0  23  -3    0.43    9.70
   0 -23   3    6.30   10.68
   0  23   3   19.66    8.49
   0 -23  -3   10.16    8.91
   0 -23   4  351.14   18.09
   0  23  -4  352.42   16.99
   0 -23  -4  295.27   14.52
   0  23   4  342.85   14.20
   0 -23   5   19.12   11.50
   0  23  -5   17.72    9.96
   0  23  -6   70.33   12.12
   0 -23   6   55.90   12.24
   0 -24   0  382.08   17.60
   0  24   0  388.03   16.26
   0  24   1   11.77    8.76
   0 -24   1    6.64   10.65
   0  24  -1   -6.44    9.82
   0 -24  -1    4.53    9.96
   0  24   2  119.34   11.05
   0 -24   2   79.77   12.69
   0  24  -2   93.01   12.14
   0 -24  -2   97.01   11.75
   0 -24   3    9.11   10.42
   0  24   3   -7.52    8.64
   0  24  -3    4.78    9.24
   0 -24  -3    1.60    9.17
   0  24  -4    1.60    9.84
   0 -24   4    7.29   11.25
   0 -24   5  -11.44   11.82
   0  24   5    2.07    7.57
   0  24  -5    7.23   10.90
   0 -24   6  203.42   15.95
   0  24  -6  229.33   15.61
   0 -25   0   -1.76   10.15
   0 -25   1   92.56   13.22
   0  25  -1   78.12   11.73
   0  25   1   78.47   10.77
   0 -25  -2  117.95   12.66
   0  25   2  107.41   11.04
   0  25  -2   94.54   12.24
   0 -25   2  103.52   13.50
   0  25  -3   12.98   10.22
   0  25   3   16.50    8.19
   0 -25   3    4.24   11.53
   0  25   4  124.31   10.73
   0 -25   4  162.05   15.06
   0 -26   0    5.94   10.79
   0 -26  -3  230.61   15.05
  -1   0  17  232.03   14.41
  -1   0  16    3.28    8.26
  -1   0  15   38.55    9.49
  -1   0  13    3.84    7.35
  -1   0  12    7.83    6.99
   1   0 -11 2059.32   20.96
  -1   0  11 1995.51   25.99
  -1   0  10    3.07    6.07
   1   0 -10   -1.52    4.28
  -1   0  10    3.55    3.19
   1   0  -9  837.95   12.68
  -1   0   9  836.74   15.53
  -1   0   9  853.15   11.04
  -1   0   8    2.89    4.94
  -1   0   8   -1.08    2.71
   1   0  -8   -0.01    3.91
  -1   0   7   31.39    4.80
   1   0  -7   36.61    4.29
  -1   0   6   -0.35    3.68
   1   0  -6    4.63    3.36
  -1   0   6    0.46    2.28
   1   0  -5 2876.30   17.90
  -1   0   5 2876.14   14.01
  -1   0   5 2879.97   19.57
  -1   0   4    4.07    1.55
  -1   0   4   -0.24    2.55
   1   0  -4    3.29    2.70
  -1   0   3 8120.81   24.95
   1   0  -3 8200.58   25.20
   1   0  -2    1.67    1.93
  -1   0   1 3797.06   12.02
   1   0  -1 3760.73   13.38
  -1   0   0    9.26    0.78
   1   0   0   14.40    1.06
   1   0   0    8.44    0.88
   1   0   1  112.79    2.54
   1   0   1  115.41    2.10
   1   0   2    2.81    1.57
   1   0   3  493.44    6.78
   1   0   3  508.82    7.04
   1   0   5 5590.55   25.54
   1   0   5 5560.88   27.21
  -1   0  -6    1.38    1.67
   1   0   6   -0.14    3.27
   1   0   7  252.12    7.98
   1   0   7  264.77    7.39
  -1   0  -7  245.96    4.72
   1   0   8   -2.20    4.80
  -1   0  -8    1.04    2.38
   1   0   8   -0.84    3.89
  -1   0  -9  147.59    4.68
   1   0   9  157.90    7.85
   1   0   9  151.01    6.64
   1   0  10    7.71    5.54
   1   0  10   -4.46    4.24
   1   0  11 1689.08   23.18
   1   0  11 1663.41   19.62
   1   0  12    4.71    4.87
   1   0  12   14.05    6.65
   1   0  13  586.36   13.01
   1   0  13  600.93   16.42
   1   0  14    5.27    7.95
   1   0  15   65.89    9.53
   1   0  16   -3.44    8.70
   1   0  17   51.27   10.01
  -1  -1  17    5.67    9.20
  -1   1  17   26.93    9.90
  -1   1  16   72.22   10.39
  -1  -1  16   77.91   10.45
  -1  -1  15  221.75   13.28
  -1   1  15  235.04   13.19
  -1   1  14    5.58    7.77
  -1  -1  14    2.39    7.36
  -1  -1  13  309.61   13.04
  -1   1  13  305.43   12.89
   1   1 -12   45.19    5.53
  -1  -1  12   54.00    7.73
  -1   1  12   49.13    8.05
  -1   1  11   42.73    7.33
   1  -1 -11   41.15    5.18
   1   1 -11   50.07    5.37
  -1  -1  11   41.98    4.31
  -1  -1  10  648.57   14.75
   1   1 -10  674.42   12.21
  -1   1  10  624.39   14.49
  -1   1  10  665.51    9.81
  -1  -1  10  646.65   10.67
   1  -1 -10  639.88   11.61
  -1   1   9  943.53   10.99
  -1  -1   9  921.04   16.22
  -1  -1   9  957.84   12.25
  -1   1   9  893.55   15.96
   1  -1  -9  905.59   13.13
   1   1  -9  929.85   13.46
   1   1  -8  102.17    5.56
  -1  -1   8  109.25    4.96
   1  -1  -8   97.09    5.54
  -1   1   8   96.90    6.87
  -1   1   8  106.52    4.23
  -1  -1   8   94.07    6.57
  -1   1   7 2856.42   23.93
  -1  -1   7 2802.95   23.05
  -1   1   7 2904.45   16.42
   1  -1  -7 2763.11   20.08
   1   1  -7 2876.34   20.29
  -1  -1   7 2850.67   18.03
   1  -1  -6  104.84    5.24
  -1  -1   6  103.49    3.94
   1   1  -6  107.33    4.69
  -1  -1   6   98.94    5.20
  -1   1   6  108.99    5.70
  -1   1   6  105.99    3.46
  -1  -1   5 3482.03   21.21
  -1   1   5 3585.33   22.13
   1   1  -5 3645.78   20.13
  -1   1   5 3550.66   14.50
   1  -1  -5 3467.65   19.98
  -1  -1   5 3537.54   16.36
  -1  -1   4  294.77    4.53
   1  -1  -4  278.82    5.94
  -1  -1   4  272.99    5.78
   1   1  -4  291.25    5.80
  -1   1   4  269.01    5.91
  -1   1   4  273.89    3.60
   1  -1  -3 1039.23    9.46
  -1  -1   3 1042.88    9.12
  -1   1   3 1000.31    4.92
  -1  -1   3 1033.10    6.69
   1   1  -3 1054.14    9.23
  -1   1   3 1050.29    9.49
   1   1  -2 1623.27   10.00
  -1   1   2 1630.45    9.75
  -1  -1   2 1589.53    7.09
   1  -1  -2 1641.07   10.37
  -1  -1   2 1589.40    9.57
  -1  -1   1 2337.08    9.75
  -1   1   1 2306.94    9.25
   1   1  -1 2313.95    8.07
   1   1  -1 2339.14   10.35
   1  -1  -1 2381.71   10.73
   1   1   0  211.69    2.58
   1  -1   0  225.00    2.99
  -1   1   0  201.02    2.04
   1   1   0  201.81    2.82
  -1  -1   0  229.05    2.70
  -1   1  -1 5770.21   13.81
   1   1   1 5853.98   16.60
   1  -1   1 5933.15   17.01
   1   1   1 5863.82   15.22
   1  -1   1 5846.56   11.43
   1  -1   2   98.58    3.32
   1   1   2  107.64    3.03
  -1   1  -2  101.42    2.15
   1  -1   2  106.00    2.60
   1   1   2   93.79    3.02
   1   1   3   25.88    2.77
   1  -1   3   31.38    2.54
  -1   1  -3   31.18    1.65
   1   1   3   28.56    2.56
  -1   1  -4  573.21    5.27
   1  -1   4  604.46    7.97
   1   1   4  566.82    8.35
   1   1   4  580.37    7.69
  -1  -1  -4  585.13    3.88
   1  -1   4  607.15    8.51
  -1  -1  -5   26.03    1.60
   1   1   5   27.90    3.67
   1  -1   5   24.87    3.54
   1  -1   5   24.94    3.22
   1   1   5   18.91    3.05
  -1   1  -5   22.67    1.92
  -1  -1  -6  748.00    6.37
  -1   1  -6  741.05    7.46
   1   1   6  751.20   10.26
   1  -1   6  749.82   11.10
   1  -1   6  778.87   10.98
   1   1   6  750.22   11.52
   1   1   7 4669.86   26.39
   1  -1   7 4637.07   27.62
   1   1   7 4810.12   30.29
   1  -1   7 4733.42   28.89
  -1   1  -7 4556.76   19.78
  -1  -1  -7 4628.31   17.41
   1   1   8   33.40    4.40
  -1   1  -8   23.41    2.90
   1  -1   8   37.90    4.70
   1  -1   8   31.21    4.98
  -1  -1  -8   28.25    2.64
   1  -1   9  851.08   14.96
   1  -1   9  826.22   13.44
  -1  -1  -9  795.88    8.92
   1   1   9  857.95   12.99
  -1   1  -9  816.86   10.01
   1   1   9  862.65   15.39
   1  -1  10  593.39   13.59
   1  -1  10  543.88   11.75
   1   1  10  580.84   13.74
   1   1  10  571.05   11.31
  -1   1 -10  569.66    8.85
   1  -1  11  394.91   10.64
   1   1  11  388.92   12.65
   1   1  11  401.97   10.15
   1   1  12  303.09   12.13
   1  -1  12  304.88   10.00
   1  -1  12  314.24   12.02
   1   1  12  310.71    9.57
   1  -1  13   87.44    8.66
   1  -1  13   94.94    7.08
   1   1  13   99.32    9.40
   1  -1  14  130.61   10.57
   1   1  14  152.63   11.13
   1  -1  15  309.52   14.12
   1   1  15  320.48   14.31
   1   1  16   -2.73    8.46
   1  -1  16   -9.11    8.32
   1  -1  17  120.98   11.58
   1   1  17  134.92   12.14
  -1   2  17   81.70   11.11
  -1  -2  17   93.23   11.24
  -1  -2  16  123.06   11.49
  -1   2  16   86.96   11.35
  -1   2  15    9.91    8.67
  -1  -2  15    1.55    8.14
  -1  -2  14  259.88   12.67
  -1   2  14  276.19   13.38
  -1   2  13   18.21    7.60
  -1  -2  13    9.80    7.46
   1   2 -12  291.22    9.61
  -1   2  12  281.16   12.29
  -1  -2  12  284.03   11.91
  -1  -2  11  297.03    8.28
  -1  -2  11  326.66   11.96
   1   2 -11  306.78    9.39
   1  -2 -11  322.52    9.12
  -1   2  11  347.39   12.48
   1   2 -10  143.11    6.90
  -1   2  10  156.34    5.35
   1  -2 -10  137.03    6.71
  -1   2  10  173.66    9.29
  -1  -2  10  159.09    6.45
  -1  -2  10  142.21    8.59
   1   2  -9  193.54    7.26
  -1   2   9  199.76    9.09
  -1  -2   9  210.61    9.19
  -1  -2   9  199.01    6.70
   1  -2  -9  199.88    7.29
  -1   2   9  190.98    5.38
  -1   2   8 1784.73   13.51
  -1  -2   8 1652.74   19.20
  -1   2   8 1647.03   19.92
  -1  -2   8 1740.65   15.99
   1  -2  -8 1667.02   16.71
   1   2  -8 1701.23   17.16
  -1  -2   7   92.87    5.72
  -1   2   7   97.05    6.26
  -1   2   7   86.60    3.43
   1  -2  -7   95.08    5.59
   1   2  -7   98.34    5.37
  -1  -2   7  102.69    4.69
  -1   2   6 2489.65   21.12
  -1  -2   6 2504.79   16.10
  -1   2   6 2435.44   13.04
   1  -2  -6 2537.79   18.67
  -1  -2   6 2554.64   19.83
   1   2  -6 2587.80   18.45
  -1   2   5   67.30    2.34
   1   2  -5   78.30    3.93
  -1  -2   5   68.75    4.18
  -1  -2   5   74.11    3.51
  -1   2   5   59.05    4.16
   1  -2  -5   64.84    4.17
   1   2  -4 3974.22   19.32
  -1  -2   4 3917.83   19.67
  -1   2   4 3952.45   21.50
   1  -2  -4 3844.36   19.95
  -1  -2   4 3930.91   16.30
  -1   2   4 3873.16   12.21
  -1  -2   3 2215.22   11.07
  -1   2   3 2198.73    7.33
   1   2  -3 2217.95   13.29
  -1   2   3 2275.02   14.34
  -1  -2   3 2213.97   13.24
   1  -2  -3 2250.77   13.76
  -1  -2   2 2285.02   10.12
   1   2  -2 2275.35   11.95
  -1  -2   2 2281.07   11.72
   1  -2  -2 2293.82   12.49
  -1   2   2 2298.85   12.24
   1   2  -2 2200.09    9.93
  -1   2   1 1503.44    7.71
   1  -2  -1 1515.33    9.29
   1   2  -1 1465.52    7.74
   1   2  -1 1475.51    8.45
  -1  -2   1 1507.94    8.24
  -1   2   0 3793.13   13.95
   1   2   0 3832.92   13.45
   1   2   0 3853.61   11.36
  -1  -2   0 3891.48   12.04
   1  -2   0 3871.79   12.01
   1   2   1   21.55    1.01
   1   2   1   27.41    1.84
   1   2   1   20.71    1.60
  -1   2  -1   23.78    1.66
   1  -2   1   23.70    1.89
   1   2   2 9666.29   25.49
   1  -2   2 9659.10   26.21
   1  -2   2 9557.93   19.76
   1   2   3  897.21    8.65
   1  -2   3  898.37    8.06
   1  -2   3  916.03    9.41
   1   2   3  931.74    9.68
  -1   2  -3  940.74    7.30
  -1   2  -4   49.21    2.36
   1   2   4   46.76    3.47
  -1  -2  -4   45.30    1.70
   1   2   4   57.04    3.18
   1  -2   4   52.53    3.10
   1  -2   4   48.58    3.56
   1   2   5 1034.85   12.68
  -1   2  -5  976.84    8.45
   1   2   5  940.39   10.53
  -1  -2  -5 1010.19    6.43
   1  -2   5 1006.16   11.73
   1  -2   5 1042.96   11.45
  -1   2  -6  327.21    5.63
   1   2   6  338.91    7.22
   1  -2   6  389.30    8.29
  -1  -2  -6  379.81    4.69
   1  -2   6  359.84    8.16
   1   2   6  385.09    8.93
  -1  -2  -7  242.66    4.33
   1   2   7  255.64    8.31
   1  -2   7  236.55    7.62
   1   2   7  223.00    6.40
   1  -2   7  246.87    7.68
  -1   2  -7  235.83    5.38
   1   2   8 1743.69   17.12
   1   2   8 1772.12   20.34
   1  -2   8 1743.34   18.99
   1  -2   8 1714.84   18.39
  -1  -2  -8 1678.61   11.30
  -1   2  -8 1637.61   13.72
   1   2   9  258.33    7.67
  -1   2  -9  264.57    6.46
   1  -2   9  283.26    9.04
  -1  -2  -9  271.87    5.28
   1   2   9  295.08   10.11
   1  -2   9  263.14    9.04
   1  -2  10  752.43   14.59
   1   2  10  777.62   15.97
   1   2  10  733.60   12.53
  -1   2 -10  726.42   10.63
   1  -2  10  715.16   13.40
   1  -2  11   64.35    7.05
   1  -2  11   54.20    6.02
   1   2  11   63.79    5.53
   1   2  11   62.83    7.65
   1  -2  12    2.08    6.35
   1   2  12    2.59    7.01
   1  -2  12    0.99    5.48
   1   2  12    5.20    4.47
   1  -2  13  263.78   12.16
   1   2  13  244.48   12.14
   1  -2  13  228.66    9.41
   1  -2  14  182.22   11.01
   1   2  14  179.44   11.80
   1  -2  15    7.97    7.62
   1   2  15    5.59    8.42
   1   2  16  236.10   13.87
   1  -2  16  248.47   13.70
   1   2  17   10.70    9.03
   1  -2  17   21.55    8.79
  -1  -3  17   -0.76    8.82
  -1   3  17   -6.59    9.56
  -1   3  16  174.41   12.59
  -1  -3  16  208.84   13.22
  -1  -3  15   11.10    8.25
  -1   3  15   -4.90    8.88
  -1   3  14    5.33    7.96
  -1  -3  14    3.46    7.65
  -1   3  13  -11.38    8.23
  -1  -3  13   -6.83    7.28
  -1  -3  12  521.32   14.94
   1   3 -12  541.99   12.71
  -1  -3  11  113.57    8.65
   1   3 -11  131.59    7.28
  -1   3  11  143.51    9.44
  -1  -3  11  120.70    6.32
   1  -3 -11  123.49    6.67
   1   3 -10 1511.70   18.28
   1  -3 -10 1426.52   16.99
  -1  -3  10 1489.28   17.25
  -1   3  10 1460.35   21.85
  -1  -3  10 1512.78   21.37
   1  -3  -9  174.62    7.07
  -1   3   9  198.79    5.37
   1   3  -9  179.08    7.28
  -1  -3   9  195.21    6.90
  -1  -3   9  182.42    8.50
  -1   3   9  171.71    8.50
  -1   3   8  994.14   10.21
   1   3  -8 1019.17   13.79
  -1  -3   8 1049.36   12.97
  -1   3   8 1024.98   16.44
   1  -3  -8 1015.06   13.71
  -1  -3   8  990.72   15.02
  -1   3   7  780.29    8.36
  -1  -3   7  784.82   12.36
  -1  -3   7  777.04   10.56
   1  -3  -7  799.81   11.75
  -1   3   7  796.91   13.56
   1   3  -7  787.32   11.54
  -1   3   6  574.66   10.85
  -1  -3   6  576.97    9.81
   1   3  -6  594.69    9.46
   1  -3  -6  578.58    9.54
  -1  -3   6  569.46    8.52
  -1   3   6  562.84    6.53
  -1   3   5  428.62    8.71
  -1  -3   5  451.71    7.03
  -1  -3   5  447.34    7.82
   1  -3  -5  482.13    8.27
  -1   3   5  462.59    5.29
   1   3  -5  472.49    7.88
   1  -3  -4 3891.16   19.97
  -1   3   4 3915.63   12.99
  -1  -3   4 3821.83   17.59
   1   3  -4 3889.22   19.78
  -1  -3   4 3930.59   19.66
  -1   3   4 3892.92   22.31
  -1   3   3 1986.49   14.17
   1   3  -3 1968.10   12.94
   1  -3  -3 1995.55   13.23
  -1  -3   3 1913.39   12.53
  -1   3   3 1957.47    7.81
  -1  -3   3 1983.92   11.65
  -1   3   2 8067.93   24.22
   1   3  -2 8392.23   21.99
  -1  -3   2 8367.29   23.13
   1   3  -2 8229.54   23.69
   1  -3  -2 8285.56   24.86
  -1   3   1   63.83    2.30
  -1   3   1   65.26    2.83
  -1  -3   1   66.67    2.47
   1   3  -1   71.12    2.56
   1   3  -1   64.10    2.38
   1   3   0 1268.79    8.67
   1   3   0 1306.63    7.66
  -1  -3   0 1324.75    7.83
   1  -3   0 1314.85    7.89
  -1   3   0 1277.26    9.52
  -1   3  -1  252.54    4.46
   1  -3   1  228.69    4.18
   1   3   1  231.53    3.97
   1   3   1  241.30    3.17
   1   3   1  231.01    4.32
   1  -3   2 1389.98   10.68
   1   3   2 1331.39   10.53
  -1   3  -2 1405.26    9.70
   1   3   2 1347.36   10.30
   1   3   2 1382.58    7.14
   1   3   3  185.37    4.99
   1  -3   3  173.10    3.72
  -1   3  -3  176.99    4.12
   1   3   3  188.79    2.76
   1   3   3  189.17    4.58
   1  -3   3  182.03    5.03
   1  -3   4 2512.90   17.10
   1   3   4 2502.41   18.17
  -1  -3  -4 2476.89   10.01
   1  -3   4 2502.22   15.00
  -1   3  -4 2484.22   13.94
   1   3   4 2543.40   16.06
  -1   3  -5    2.56    2.15
   1  -3   5   -0.50    3.48
   1   3   5    0.42    3.32
  -1  -3  -5    0.57    1.71
   1  -3   5    1.01    2.67
   1   3   5   -1.56    2.52
   1   3   6 2019.05   19.16
  -1   3  -6 1967.93   14.04
   1  -3   6 1995.86   17.86
  -1  -3  -6 2025.34   10.99
   1   3   6 1957.47   16.14
   1  -3   7   95.35    5.51
  -1   3  -7   94.65    4.21
   1   3   7   89.05    6.20
   1   3   7   89.62    4.81
  -1  -3  -7   97.95    3.30
   1  -3   7   91.28    5.95
  -1   3  -8   35.73    3.76
   1  -3   8   47.00    5.22
  -1  -3  -8   38.64    2.81
   1  -3   8   35.51    5.37
   1   3   8   32.51    5.51
   1   3   8   38.06    4.29
   1  -3   9    9.16    5.17
   1   3   9    0.61    5.65
   1   3   9    1.90    3.71
  -1   3  -9    6.43    3.20
  -1   3 -10  858.27   12.04
   1   3  10  909.90   13.86
   1   3  10  927.10   17.30
   1  -3  10  857.32   15.14
   1  -3  10  904.47   15.90
   1  -3  11   -3.38    5.55
   1  -3  11   -0.54    5.73
   1   3  11    3.29    4.32
   1   3  11   -0.55    6.39
   1   3  12 1126.44   16.58
   1   3  12 1148.88   21.27
   1  -3  12 1124.21   19.75
   1   3  13   -3.82    7.54
   1  -3  13   -3.10    5.62
   1  -3  13   -2.49    6.70
   1  -3  14  371.18   14.06
   1   3  14  394.04   15.12
   1  -3  15    2.60    7.51
   1   3  15  -12.37    8.95
   1  -3  16    7.99    8.52
   1   3  16   20.98    9.03
   1  -3  17    7.11    8.45
   1   3  17  -18.30    9.98
  -1   4  16   64.59   10.59
  -1  -4  16   71.31   10.22
  -1   4  15   20.97    9.38
  -1  -4  14  433.32   15.55
  -1   4  14  439.22   15.79
  -1  -4  13   13.41    7.23
  -1   4  13   25.94    8.08
  -1  -4  12  338.28   12.74
  -1  -4  12  308.20    9.68
  -1   4  12  333.73   12.92
   1   4 -12  329.27   10.57
  -1  -4  11  215.66    8.22
  -1  -4  11  229.19   10.34
   1  -4 -11  186.72    7.61
  -1   4  11  207.94   10.52
   1   4 -11  197.88    8.67
  -1   4  10    9.61    6.12
  -1  -4  10    1.45    4.37
   1   4 -10    2.28    4.68
   1  -4 -10   -1.03    4.51
  -1  -4  10    7.85    5.81
   1   4  -9  184.00    7.36
   1  -4  -9  163.24    7.33
  -1  -4   9  183.06    6.99
  -1  -4   9  174.73    8.11
  -1   4   9  176.84    5.13
  -1   4   9  199.17    9.33
  -1   4   8  986.90   10.25
   1  -4  -8  975.25   13.71
  -1   4   8  978.30   16.10
   1   4  -8  964.27   13.77
  -1  -4   8  969.90   13.12
  -1  -4   8  955.13   14.62
   1   4  -7   28.19    4.54
   1  -4  -7   24.16    4.49
  -1  -4   7   21.60    4.60
  -1   4   7   27.23    4.95
  -1  -4   7   18.12    4.07
  -1   4   7   28.29    2.63
   1   4  -6 1966.82   16.92
  -1  -4   6 1881.01   15.64
  -1   4   6 1972.74   12.40
   1  -4  -6 1939.55   16.93
  -1   4   6 1906.23   19.33
  -1  -4   6 1888.51   17.16
  -1   4   5 1043.39    8.15
  -1   4   5 1047.25   13.27
  -1  -4   5 1018.32   10.79
  -1  -4   5  990.45   11.55
   1  -4  -5 1036.43   11.65
   1   4  -5 1045.72   11.70
  -1  -4   4   19.73    2.99
   1   4  -4   23.48    3.01
   1  -4  -4   14.69    2.82
  -1  -4   4   19.49    2.72
  -1   4   4   17.61    1.62
   1   4  -3  924.25    9.38
  -1   4   3  925.81    6.31
   1  -4  -3  942.89    9.95
  -1  -4   3  936.49    9.22
  -1   4   3  944.95   10.36
  -1  -4   3  947.89    8.96
   1   4  -2 1441.17   10.64
   1  -4  -2 1464.02   11.47
  -1   4   2 1430.51   10.86
  -1   4   2 1463.66   11.32
  -1   4   2 1428.82    7.76
   1   4  -2 1420.35   10.27
  -1  -4   2 1408.97   10.15
   1   4  -1  863.62    7.91
  -1  -4   1  876.34    7.32
  -1   4   1  853.64    7.01
   1  -4  -1  871.71    6.69
   1   4  -1  873.05    7.78
  -1   4   1  874.05    8.90
   1   4   0 6742.82   21.75
   1  -4   0 6712.53   20.03
  -1  -4   0 6898.07   19.34
  -1   4   0 6895.95   24.02
   1   4   1  269.70    4.06
   1   4   1  277.62    5.01
   1   4   1  250.46    4.45
   1  -4   1  261.07    4.87
  -1   4  -1  282.40    5.32
   1  -4   2 2083.05   13.62
  -1   4  -2 2114.74   13.34
   1   4   2 2089.74   13.71
   1   4   2 2146.65   10.63
   1   4   2 2063.52   13.58
   1  -4   2 2071.87    7.91
   1  -4   3 2187.75   15.37
  -1   4  -3 2228.94   14.09
   1   4   3 2192.12   15.84
   1   4   3 2201.67   14.82
   1   4   3 2222.12   10.73
   1  -4   3 2210.36   11.35
  -1  -4  -4 2783.68   12.01
   1  -4   4 2786.86   15.48
   1  -4   4 2774.45   18.64
  -1   4  -4 2748.85   16.23
   1   4   4 2752.29   17.49
   1   4   4 2748.53   19.76
   1   4   5  609.76   10.55
  -1   4  -5  616.06    8.40
   1   4   5  634.04    9.26
  -1  -4  -5  634.93    6.32
   1  -4   5  663.60   10.31
   1  -4   5  644.26    8.86
   1  -4   6 1487.38   14.73
  -1   4  -6 1426.00   13.07
   1   4   6 1436.25   14.27
   1   4   6 1430.19   16.82
   1  -4   6 1471.33   15.97
  -1  -4  -6 1490.68   10.46
  -1  -4  -7   34.92    3.03
   1  -4   7   32.62    4.56
   1   4   7   23.11    3.74
   1   4   7   32.22    5.33
   1  -4   7   32.01    5.08
  -1   4  -7   30.01    3.56
   1  -4   8 1347.35   16.55
   1   4   8 1316.38   15.25
  -1   4  -8 1247.44   13.78
   1  -4   8 1275.65   16.99
  -1  -4  -8 1295.21   10.45
   1   4   8 1299.23   18.30
  -1   4  -9    9.18    3.60
   1  -4   9    8.39    5.16
   1   4   9    1.57    5.97
   1  -4   9    4.89    4.64
   1   4   9    9.99    3.95
   1   4  10  657.26   15.40
   1  -4  10  629.07   13.37
   1  -4  10  611.02   13.66
  -1   4 -10  637.60   11.13
   1   4  10  611.49   11.65
   1  -4  11  864.78   16.11
   1  -4  11  918.25   17.03
   1   4  11  933.21   18.51
   1   4  11  912.00   14.34
   1  -4  12    6.40    5.90
   1   4  12    2.88    7.36
   1   4  12    5.86    4.58
   1  -4  12   10.85    5.92
   1  -4  13   79.60    7.56
   1  -4  13   97.07    8.75
   1   4  13   82.36    9.43
   1  -4  14  251.41   10.85
   1   4  14  256.76   13.64
   1  -4  14  247.93   12.18
   1  -4  15   53.37    8.53
   1   4  15   72.20   10.32
   1  -4  16  207.02   12.26
   1   4  16  216.58   13.75
   1  -4  17    8.19    8.06
   1   4  17   11.20    9.08
  -1  -5  17   17.70    8.91
  -1  -5  16   -7.37    8.63
  -1   5  16   20.90    9.76
  -1  -5  15  289.49   13.71
  -1   5  15  303.13   14.83
  -1   5  14    5.85    8.70
  -1  -5  14   16.67    8.31
  -1  -5  13  337.00   13.38
  -1   5  13  370.35   14.41
  -1   5  12  236.32   11.87
  -1  -5  12  216.76    9.12
   1   5 -12  235.42    9.69
  -1  -5  12  224.60   11.11
  -1   5  11   15.86    6.82
  -1  -5  11   33.34    5.73
   1   5 -11   24.76    5.50
   1   5 -10  329.12    9.91
  -1   5  10  329.60   11.71
  -1  -5  10  322.22   10.77
   1  -5 -10  308.93    9.19
  -1  -5  10  314.22    9.31
  -1  -5   9  408.19    9.88
   1   5  -9  433.82   10.69
  -1   5   9  417.31    7.45
   1  -5  -9  395.88   10.08
  -1  -5   9  428.76   11.02
  -1   5   9  432.81   12.33
  -1   5   8  214.59    5.36
  -1  -5   8  202.06    7.85
   1   5  -8  238.12    8.02
  -1  -5   8  199.55    7.31
   1  -5  -8  199.16    7.53
  -1   5   8  211.22    8.86
   1   5  -7 4365.21   27.38
  -1   5   7 4399.85   20.28
  -1  -5   7 4331.12   26.46
   1  -5  -7 4259.50   26.90
  -1  -5   7 4321.42   27.69
   1  -5  -6   71.27    4.97
  -1   5   6   68.25    3.10
  -1  -5   6   63.29    4.86
  -1  -5   6   64.88    4.58
   1   5  -6   64.35    4.71
  -1   5   6   75.43    5.78
  -1  -5   5 2293.43   16.92
  -1   5   5 2315.06   19.89
  -1  -5   5 2296.02   17.16
  -1   5   5 2338.47   12.74
   1  -5  -5 2287.49   17.61
   1   5  -5 2283.03   17.69
   1   5  -4  801.03   10.04
  -1   5   4  782.10   10.92
  -1   5   4  797.99    7.03
  -1  -5   4  777.50    9.52
  -1  -5   4  812.77    9.66
   1  -5  -4  792.94   10.14
   1   5  -3  638.78    8.54
  -1   5   3  653.04    6.18
  -1  -5   3  620.69    8.10
   1  -5  -3  627.97    8.72
  -1   5   3  629.69    8.86
  -1  -5   3  610.75    7.87
  -1   5   2 1982.29   14.36
   1   5  -2 1954.48   13.27
  -1  -5   2 1999.71   12.40
   1   5  -2 1990.25   13.48
  -1   5   2 2003.18   10.79
   1  -5  -1  739.52    7.03
  -1   5   1  695.81    6.64
   1   5  -1  728.72    8.09
  -1   5   1  727.17    8.82
   1   5  -1  692.91    7.70
  -1  -5   1  731.95    6.99
  -1   5   0   36.00    3.16
   1   5   0   28.23    2.33
  -1   5   0   26.72    1.35
   1   5   0   39.82    2.78
  -1  -5   0   26.20    2.32
   1  -5   0   26.02    2.69
   1   5   1 1176.92   10.39
  -1   5  -1 1226.96   11.16
   1   5   1 1211.65    9.63
   1   5   1 1195.80    9.30
   1  -5   1 1188.38   10.21
  -1   5  -2    4.37    2.47
   1   5   3 1701.67   14.58
   1   5   3 1722.80   10.95
  -1   5  -3 1731.93   13.56
   1   5   3 1657.12   13.77
   1  -5   3 1661.89   14.02
   1  -5   3 1681.82    9.40
  -1   5  -4 2417.32   16.68
   1   5   4 2397.58   18.84
   1  -5   4 2433.68   18.24
   1  -5   4 2495.84   14.28
   1   5   4 2476.71   12.95
   1   5   4 2488.26   17.74
   1  -5   5  829.24    9.81
   1  -5   5  846.71   11.90
   1   5   5  844.92   10.94
   1   5   5  819.39   12.44
  -1   5  -5  815.02   10.32
  -1  -5  -5  836.29    7.91
   1   5   6  301.33    7.39
   1  -5   6  295.05    7.08
  -1   5  -6  260.36    6.63
  -1  -5  -6  297.03    5.42
   1  -5   6  282.22    8.23
   1   5   6  289.66    8.60
  -1  -5  -7 1220.97   10.81
  -1   5  -7 1255.56   13.91
   1  -5   7 1258.03   14.68
   1   5   7 1294.88   17.81
   1  -5   7 1252.88   16.30
   1   5   7 1254.46   14.53
  -1   5  -8    0.71    3.81
   1  -5   8    1.03    5.08
   1   5   8    7.45    5.70
  -1  -5  -8    3.95    2.96
   1   5   8    4.38    3.60
   1   5   9 2105.89   24.94
   1  -5   9 2176.84   22.34
   1  -5   9 1989.78   22.46
   1   5   9 2106.87   20.25
  -1   5  -9 2046.89   19.41
  -1   5 -10   50.30    5.05
   1  -5  10   46.58    6.81
   1   5  10   58.11    7.70
   1   5  10   57.39    5.15
   1  -5  10   52.60    5.95
   1  -5  11   47.96    7.26
   1   5  11   61.82    8.51
   1   5  11   60.85    5.42
   1  -5  11   64.69    6.95
  -1   5 -11   66.71    5.57
   1  -5  12  229.59   10.25
   1  -5  12  258.48   10.87
   1   5  12  237.48   12.18
   1  -5  13   64.33    7.57
   1  -5  13   50.31    7.80
   1   5  13   70.84    9.44
   1   5  14    2.11    9.15
   1  -5  14   13.56    7.32
   1  -5  14   13.14    6.53
   1  -5  15  310.97   13.34
   1   5  15  326.01   15.50
   1   5  16    3.45    8.92
   1  -5  16   -4.76    7.94
  -1  -6  17  178.40   12.78
  -1   6  16   -3.68    9.80
  -1  -6  16   -2.39    7.98
  -1  -6  15  107.00   10.71
  -1   6  15  103.38   11.75
  -1   6  14   -1.76    9.01
  -1  -6  13  242.30   12.05
  -1   6  13  225.56   12.55
  -1  -6  12   -0.04    5.78
  -1   6  12    4.02    7.84
  -1  -6  12  -11.85    6.97
   1   6 -12    0.78    5.49
  -1  -6  11  425.71   11.52
  -1   6  11  480.99   14.55
   1   6 -11  465.95   12.50
  -1  -6  11  423.74   13.20
   1  -6 -10   97.42    6.74
  -1  -6  10   87.69    7.33
  -1  -6  10  105.03    7.11
  -1   6  10   96.26    8.47
  -1   6   9 1291.95   12.63
  -1   6   9 1398.83   20.56
   1  -6  -9 1354.19   16.90
  -1  -6   9 1351.27   18.50
  -1  -6   9 1333.47   17.18
   1   6  -9 1384.32   18.24
  -1   6   8   25.69    2.92
  -1   6   8   30.34    6.17
  -1  -6   8   20.23    4.66
   1  -6  -8   17.26    4.91
  -1   6   7    4.85    2.51
  -1  -6   7   -0.75    4.39
   1  -6  -7    2.34    4.36
  -1   6   7   -1.61    5.12
   1   6  -7    3.16    4.43
  -1   6   6  270.96    8.36
   1   6  -6  267.11    7.60
  -1  -6   6  269.36    7.35
  -1  -6   6  249.22    7.00
   1  -6  -6  268.49    7.46
  -1   6   6  274.78    5.35
  -1  -6   5 1509.63   14.72
   1   6  -5 1573.69   15.42
  -1   6   5 1530.50   11.05
  -1   6   5 1505.55   16.35
   1  -6  -5 1546.17   15.05
  -1  -6   5 1504.94   14.13
  -1  -6   4  109.84    4.88
   1   6  -4  113.49    4.92
  -1   6   4  107.76    5.04
  -1  -6   4  100.26    4.50
  -1   6   4  118.70    3.41
   1  -6  -4  106.11    4.76
  -1   6   3 8093.72   30.99
  -1   6   3 8130.56   23.81
  -1  -6   3 8049.42   27.57
   1   6  -3 8071.42   30.46
  -1  -6   3 7955.23   29.63
  -1   6   2   20.26    2.13
  -1   6   2   18.21    2.38
   1   6  -2   26.65    2.78
   1   6  -2   18.92    2.75
  -1   6   2   27.49    3.20
  -1  -6   2   18.51    2.50
  -1   6   1 2341.98   12.55
   1   6  -1 2335.58   14.73
   1  -6  -1 2367.98   13.77
  -1  -6   1 2325.25   13.00
   1   6  -1 2351.32   15.35
  -1   6   1 2314.27   16.62
  -1   6   0 1311.13   12.49
  -1  -6   0 1291.24    9.95
   1   6   0 1296.79   11.43
  -1   6   0 1270.20    6.79
   1  -6   0 1299.65   10.81
   1   6   0 1292.86   10.75
   1   6   1  116.63    3.61
  -1   6  -1  125.87    4.60
   1   6   1  117.48    4.10
   1  -6   1  121.12    1.79
   1  -6   1  121.34    4.22
   1   6   1  123.33    3.86
   1   6   2   16.46    2.67
   1   6   2   14.47    2.72
  -1   6  -2   12.05    2.76
   1  -6   2   15.36    1.14
  -1   6  -3 6050.74   27.04
   1   6   3 5936.23   27.96
   1  -6   3 5817.86   27.03
   1  -6   3 5910.23   16.92
   1   6   3 5941.57   26.88
   1   6   3 5880.37   22.38
   1   6   4  121.56    5.45
   1   6   4  128.41    3.84
   1   6   4  123.89    4.92
  -1   6  -4  120.60    5.07
   1  -6   4  125.47    3.64
   1  -6   4  131.21    5.74
   1   6   5 2828.49   20.48
  -1   6  -5 2688.12   19.94
   1  -6   5 2810.74   22.01
  -1  -6  -5 2804.57   15.43
   1   6   5 2715.29   22.27
   1  -6   5 2854.11   17.43
  -1  -6  -6   -0.41    2.58
   1  -6   6   -2.80    5.03
   1   6   6   10.55    3.72
   1   6   6    0.05    4.27
  -1   6  -6    1.23    3.51
   1  -6   6    7.38    3.22
  -1  -6  -7  980.26   10.29
   1   6   7 1022.15   13.70
  -1   6  -7  974.82   13.08
   1  -6   7  970.60   12.96
   1   6   7  969.38   15.89
   1  -6   7  945.65   14.61
  -1   6  -8    2.09    3.97
   1   6   8    8.04    3.94
  -1  -6  -8    0.01    3.11
   1  -6   8    5.80    5.50
   1  -6   8    1.35    4.08
   1   6   9  127.93    6.32
   1  -6   9  108.17    8.01
   1  -6   9  110.63    6.58
   1   6   9  116.99    8.61
  -1   6  -9  108.41    6.18
   1  -6  10   75.52    7.78
  -1   6 -10   73.01    5.91
   1   6  10   73.17    5.74
   1   6  10   83.46    8.17
   1  -6  10   79.73    6.56
   1   6  11  688.25   17.08
   1  -6  11  673.94   15.55
   1  -6  11  653.41   14.36
   1   6  11  661.67   12.89
  -1   6 -11  623.53   12.93
   1   6  12    2.95    7.76
   1  -6  12    7.95    6.23
   1  -6  12    6.46    6.81
   1  -6  13  567.48   15.52
   1  -6  13  570.53   15.27
   1   6  13  605.35   18.10
   1  -6  14    6.93    6.85
   1  -6  14   -4.26    6.62
   1   6  16    2.62    9.41
  -1   7  16   54.26   11.20
  -1  -7  15  193.06   11.85
  -1   7  15  231.18   14.29
  -1  -7  14   -0.64    7.36
  -1   7  14   -2.96    8.70
   1   7 -13  494.28   14.40
  -1   7  13  478.44   16.17
  -1  -7  13  481.64   15.37
  -1  -7  12  206.47   10.70
  -1  -7  12  197.81    9.67
   1   7 -12  205.23    9.88
  -1   7  12  226.42   12.12
  -1   7  11   86.40    8.93
  -1  -7  11   83.04    8.02
  -1  -7  11   86.12    7.49
   1   7 -11   80.16    7.31
  -1  -7  10  104.37    7.64
  -1   7  10  106.84    8.83
   1   7 -10   99.21    7.16
   1  -7 -10  109.93    6.94
  -1  -7  10  124.75    7.62
   1  -7  -9  175.02    7.59
  -1   7   9  210.27    9.77
   1   7  -9  171.75    8.36
  -1  -7   9  156.68    7.79
  -1  -7   9  193.39    8.39
  -1   7   8  300.32    6.38
   1   7  -8  306.51    9.53
  -1  -7   8  289.81    9.10
  -1  -7   8  317.01    9.10
   1  -7  -8  277.79    8.62
  -1   7   8  315.51   10.67
  -1   7   7 1734.69   20.61
   1  -7  -7 1672.00   17.57
   1   7  -7 1677.23   18.58
  -1  -7   7 1654.40   17.92
  -1  -7   7 1691.43   17.77
  -1   7   7 1639.24   13.23
   1  -7  -6  141.71    6.30
  -1   7   6  151.90    7.03
  -1  -7   6  139.06    6.49
   1   7  -6  152.37    6.67
  -1  -7   6  144.28    5.93
  -1   7   6  136.09    4.28
  -1  -7   5 2008.01   17.78
  -1  -7   5 2044.73   16.89
   1   7  -5 2022.78   18.27
  -1   7   5 1988.69   13.45
   1  -7  -5 2076.86   17.95
  -1   7   5 2000.25   19.31
  -1   7   4 1249.51   10.56
  -1  -7   4 1170.01   13.19
  -1  -7   4 1178.89   12.11
   1   7  -4 1219.74   13.54
   1  -7  -4 1182.72   13.32
  -1   7   4 1123.99   13.57
  -1   7   3    1.05    2.78
  -1   7   3    3.66    2.05
   1   7  -3    9.70    3.10
  -1  -7   2 1743.10   12.68
  -1   7   2 1668.65   15.25
   1   7  -2 1730.83   14.32
  -1   7   2 1705.97   13.22
  -1   7   2 1762.15   12.57
   1   7  -2 1718.26   14.55
  -1  -7   2 1723.23   14.60
  -1  -7   1  517.79    6.77
   1   7  -1  497.49    7.77
   1  -7  -1  507.80    7.35
  -1   7   1  525.32    6.32
   1   7  -1  503.95    7.98
  -1   7   1  507.18    8.67
   1   7   0  688.67    9.12
   1   7   0  694.82    8.84
  -1   7   0  717.59   10.14
  -1  -7   0  737.01    8.01
   1  -7   0  715.53    8.87
  -1   7   0  696.92    5.55
  -1   7  -1 1653.15   15.01
   1  -7   1 1710.18    6.99
   1   7   1 1681.60   14.03
   1   7   1 1667.46   13.29
   1  -7   1 1701.64   14.10
   1   7   1 1666.44   12.49
  -1  -7  -1 1657.80   12.86
   1  -7   2  455.55    3.82
   1   7   2  464.98    7.70
  -1   7  -2  467.32    8.52
   1   7   2  479.40    7.40
   1   7   2  468.98    7.96
   1  -7   2  490.83    8.40
  -1   7  -3 1365.51   14.07
   1   7   3 1353.54   13.91
   1  -7   3 1369.79    8.10
   1  -7   3 1333.09   13.97
   1   7   3 1375.34   13.59
   1   7   3 1342.04   11.81
   1  -7   4  641.82    7.03
   1   7   4  638.67    8.27
   1  -7   4  629.18   10.65
   1   7   4  681.88   10.22
   1   7   4  656.33   11.12
  -1   7  -4  655.28   10.38
   1   7   5 1354.91   11.62
   1  -7   5 1429.98   16.47
   1  -7   5 1401.16   12.13
   1   7   5 1382.46   16.71
   1   7   5 1439.88   15.13
  -1   7  -5 1416.38   15.35
   1  -7   6  371.78    7.56
   1   7   6  345.34    9.78
   1  -7   6  366.63    9.82
  -1  -7  -6  366.51    6.70
  -1   7  -6  372.54    8.92
   1   7   6  370.95    8.59
   1   7   7  485.19   12.06
  -1  -7  -7  506.53    8.02
   1  -7   7  502.49    9.62
   1   7   7  499.06   10.18
   1  -7   7  515.05   11.84
  -1   7  -7  459.81    9.82
   1  -7   8   25.51    4.49
  -1  -7  -8   25.13    3.67
  -1   7  -8   28.10    4.91
   1   7   8   21.01    4.43
   1   7   9 1822.98   19.87
   1  -7   9 1746.00   22.20
   1  -7   9 1787.31   20.07
  -1   7  -9 1775.73   20.20
  -1   7 -10   81.00    6.14
   1   7  10   84.99    5.87
   1   7  10   76.74    8.65
   1  -7  10   96.89    6.83
   1  -7  10   92.19    7.95
   1   7  11   19.53    7.33
   1  -7  11   36.45    7.43
   1  -7  11   28.06    5.65
  -1   7 -11   40.81    5.95
   1   7  11   31.90    5.16
   1   7  12  342.97   13.95
   1  -7  12  328.86   12.77
   1  -7  12  342.29   11.78
   1  -7  13   79.58    8.26
   1   7  13   91.91   10.38
   1  -7  13   76.33    8.57
   1   7  14   91.61   10.87
   1  -7  14   82.22    9.14
   1   7  15  238.94   13.84
   1   7  16   -5.03    9.25
  -1   8  16   90.71   12.62
  -1  -8  15   53.19    9.23
  -1   8  15   32.87    9.94
  -1   8  14  414.16   16.48
  -1  -8  14  366.11   14.38
   1   8 -13   35.13    7.39
  -1  -8  13   41.80    7.38
  -1   8  13   46.29    9.27
  -1   8  12  205.59   11.82
  -1  -8  12  195.89   10.39
  -1  -8  12  194.35   10.07
   1   8 -12  184.88   10.05
   1   8 -11   64.07    7.46
  -1  -8  11   45.24    7.07
  -1   8  11   87.11    9.33
  -1  -8  11  101.54    8.20
  -1   8  10   17.95    7.21
   1  -8 -10   10.55    5.31
   1  -8  -9  460.02   11.32
   1   8  -9  446.11   11.84
  -1   8   9  480.04   13.46
  -1  -8   9  472.90   12.19
  -1  -8   9  454.52   11.61
  -1   8   8  634.16   14.28
  -1  -8   8  611.75   12.20
  -1  -8   8  596.91   12.76
  -1   8   8  597.08    8.82
   1   8  -8  597.05   12.85
   1  -8  -8  589.33   11.82
  -1  -8   7    6.26    4.00
  -1   8   7    3.56    5.07
  -1   8   7    2.47    2.72
   1   8  -7   11.83    4.92
  -1  -8   7   -0.85    4.75
  -1  -8   6 3032.06   22.03
  -1  -8   6 3095.93   24.10
  -1   8   6 3130.44   26.29
  -1   8   6 3113.57   18.45
   1  -8  -6 2975.07   23.16
   1   8  -6 3017.27   24.51
   1   8  -5  692.39   11.71
   1  -8  -5  698.94   11.24
  -1  -8   5  695.93   11.71
  -1   8   5  700.29   12.14
  -1   8   5  695.05    8.86
  -1  -8   5  673.85   10.39
   1  -8  -4   20.41    4.16
  -1   8   4    9.35    3.27
  -1   8   4   27.13    2.96
   1   8  -4   21.78    4.40
  -1  -8   4    9.12    4.01
  -1  -8   4   24.06    3.74
  -1   8   4   19.26    3.79
  -1   8   3  139.22    5.73
  -1  -8   3  124.45    5.37
  -1   8   3  136.87    4.41
   1   8  -3  141.23    5.59
  -1   8   3  146.42    5.44
  -1  -8   3  124.27    4.69
  -1  -8   2   16.53    3.60
  -1  -8   2   16.32    2.91
   1   8  -2   16.28    3.44
  -1   8   2   19.87    2.82
   1   8  -1  880.55   11.07
   1   8  -1  898.34   11.07
  -1   8   1  946.15   12.27
   1  -8  -1  907.20   10.60
  -1   8   1  892.96    8.44
  -1  -8   1  912.61    9.37
   1  -8   0 4942.81   24.21
   1   8   0 4725.53   24.70
  -1   8   0 4655.77   15.15
   1  -8   0 4773.46   16.03
   1   8   0 4848.99   24.39
  -1  -8   0 4835.38   21.10
  -1   8   0 4798.63   26.93
   1  -8   1  481.87    4.38
  -1   8  -1  494.28    9.12
  -1  -8  -1  462.94    7.56
   1  -8   1  473.61    8.43
   1   8   1  470.94    8.34
   1   8   1  474.32    7.98
   1  -8   2 1875.59   16.54
  -1   8  -2 1840.68   17.07
   1   8   2 1845.84   15.24
   1   8   2 1842.16   15.95
   1   8   2 1849.82   15.05
   1   8   3  800.88   11.14
   1  -8   3  748.80    6.07
   1  -8   3  756.75   11.45
   1   8   3  772.20   11.08
  -1   8  -3  721.56   11.09
   1   8   3  752.89    9.72
   1   8   4  236.96    7.42
  -1   8  -4  238.61    7.36
   1   8   4  243.27    6.80
   1  -8   4  243.20    7.71
   1  -8   4  236.64    4.53
   1   8   4  232.64    5.81
  -1   8  -5 1393.54   16.22
   1  -8   5 1458.53   12.18
   1   8   5 1383.70   17.35
   1  -8   5 1416.68   17.03
   1   8   5 1430.83   15.72
   1   8   5 1421.47   13.15
  -1  -8  -6  967.31   11.04
   1   8   6  976.80   13.73
  -1   8  -6  922.89   14.14
   1  -8   6  968.99   15.38
   1   8   6  922.19   15.32
   1  -8   6  966.24   11.51
   1  -8   7  468.62   11.90
  -1   8  -7  494.16   11.16
   1  -8   7  503.70    9.55
   1   8   7  495.90   10.30
  -1  -8  -7  485.13    8.40
   1   8   7  487.10   12.39
  -1   8  -8 1440.34   18.55
  -1  -8  -8 1423.27   14.13
   1  -8   8 1393.32   19.79
   1  -8   8 1467.00   16.76
   1   8   8 1409.20   20.82
  -1   8  -9    6.44    4.93
   1   8   9    4.11    4.32
   1  -8   9    2.82    6.29
   1  -8   9    5.70    4.27
   1   8   9   10.95    6.66
   1  -8  10  536.72   12.32
  -1   8 -10  477.40   12.24
   1  -8  10  487.22   13.69
   1   8  10  521.75   15.06
   1   8  10  506.87   11.46
   1  -8  11  119.86    8.94
   1   8  11  111.66    9.72
   1  -8  11  125.67    7.79
  -1   8 -11  136.66    8.08
   1   8  11  133.92    7.30
   1  -8  12    5.77    7.24
   1   8  12  -10.55    7.62
   1  -8  12   -8.08    6.01
   1  -8  13   47.64    8.89
   1  -8  14  166.71   11.02
   1   8  14  194.15   13.26
   1   8  15    0.66    8.73
   1   8  16  176.75   13.71
  -1   9  16  115.95   12.97
  -1   9  15   -2.25   10.09
  -1  -9  14   -3.70    7.68
  -1   9  14    3.44    9.58
   1   9 -13   13.29    7.08
  -1  -9  13   16.75    7.40
  -1   9  13    8.35    8.66
  -1  -9  12  440.03   14.08
   1   9 -12  455.57   14.28
  -1   9  12  455.38   15.70
  -1  -9  12  453.80   14.06
  -1   9  11   11.52    7.97
   1   9 -11    5.09    6.30
  -1  -9  11    7.65    6.61
  -1   9  10 1200.02   21.36
  -1  -9  10 1180.20   19.26
   1  -9 -10 1233.28   17.99
  -1  -9  10 1177.69   19.01
   1   9 -10 1242.24   20.31
   1  -9  -9  119.12    7.10
  -1   9   9  125.22    8.86
  -1  -9   9  103.96    8.05
  -1  -9   9  108.50    6.99
  -1  -9   8  460.54   10.94
   1   9  -8  458.25   12.06
  -1  -9   8  467.39   11.85
   1  -9  -8  456.08   10.90
  -1   9   8  475.54    8.25
  -1   9   8  494.81   12.92
  -1  -9   7   50.96    5.41
  -1  -9   7   59.58    6.28
   1  -9  -7   46.61    5.24
  -1   9   7   48.22    6.30
   1   9  -7   53.70    6.21
  -1   9   7   57.48    3.93
   1  -9  -6   34.28    5.04
  -1  -9   6   33.94    4.57
  -1   9   6   29.30    3.41
  -1  -9   6   33.44    5.62
  -1   9   6   32.06    5.07
   1   9  -6   32.78    5.58
  -1   9   5  110.73    4.55
  -1  -9   5   96.04    5.18
  -1   9   5  114.40    6.17
   1   9  -5  108.97    6.41
  -1  -9   5   99.55    6.36
   1  -9  -5   96.29    5.74
  -1   9   4 3580.57   24.82
  -1  -9   4 3547.61   21.65
  -1   9   4 3444.54   20.40
   1   9  -4 3583.64   25.13
  -1  -9   4 3573.17   25.17
  -1   9   4 3512.44   24.45
  -1   9   3  489.80    8.81
  -1   9   3  483.32    9.70
  -1  -9   3  499.15    9.79
   1   9  -3  470.93    9.67
  -1  -9   3  500.71    8.26
  -1   9   3  497.60    8.22
  -1   9   2 1577.85   16.41
   1  -9  -2 1628.00   14.49
  -1   9   2 1621.12   13.77
   1   9  -2 1606.64   15.90
  -1  -9   2 1613.33   13.30
  -1  -9   2 1599.23   16.13
  -1   9   2 1604.05   14.31
  -1   9   1   22.70    4.00
   1   9  -1   23.80    3.74
  -1   9   1   18.47    2.32
   1   9  -1   26.45    3.88
  -1  -9   1   22.96    3.05
   1  -9  -1   22.63    3.67
   1  -9   0 1173.34    8.46
   1   9   0 1137.02   13.30
   1   9   0 1109.74   12.87
  -1  -9   0 1105.22   11.00
   1  -9   0 1137.66   12.81
  -1   9   0 1111.91   14.05
   1   9   1   87.96    4.88
   1   9   1   89.51    4.78
   1  -9   1   82.38    2.44
   1  -9   1   93.18    5.15
  -1   9  -1   94.44    5.42
  -1  -9  -1   83.55    4.35
   1  -9   2  834.31    6.17
  -1   9  -2  859.23   12.76
   1   9   2  862.46   11.73
   1  -9   2  851.49   12.19
   1   9   2  830.91   11.03
   1   9   2  825.92   10.73
   1   9   3    1.89    3.07
   1   9   3    8.29    3.61
   1  -9   3   11.87    4.62
  -1   9  -3    2.17    3.97
   1   9   3    1.77    3.60
   1  -9   3    3.01    1.66
   1   9   4 3583.99   25.74
   1   9   4 3609.80   22.10
  -1   9  -4 3583.15   26.02
   1  -9   4 3668.08   16.07
   1   9   4 3636.93   24.69
   1  -9   5  133.93    4.36
  -1   9  -5  135.87    6.72
   1   9   5  144.92    5.27
   1  -9   5  142.13    7.80
   1   9   5  135.77    7.03
   1   9   5  133.96    6.22
   1  -9   6 1245.72   12.79
   1   9   6 1250.36   15.64
  -1   9  -6 1115.09   16.07
   1   9   6 1148.90   17.45
   1  -9   6 1215.41   17.48
  -1  -9  -6 1212.69   13.15
   1   9   7   79.64    7.16
   1   9   7   93.68    5.84
  -1   9  -7   89.23    6.42
   1  -9   7   82.52    4.85
   1  -9   7   70.97    7.63
  -1  -9  -7   75.00    4.72
   1   9   8  208.48    7.76
  -1  -9  -8  201.34    6.38
  -1   9  -8  192.46    8.47
   1  -9   8  197.38    7.13
   1  -9   8  183.71    9.55
   1   9   8  213.58   10.06
  -1   9  -9   -4.28    5.42
   1  -9   9   -2.99    6.77
   1  -9   9   -0.05    4.29
   1  -9  10  621.97   13.11
   1  -9  10  576.96   15.19
   1   9  10  610.24   12.53
  -1   9 -10  590.90   13.92
   1   9  10  621.51   16.39
  -1   9 -11    1.39    5.86
   1   9  11   -2.44    7.56
   1  -9  11    1.36    7.21
   1  -9  11    4.57    5.09
   1   9  12  726.78   18.95
   1  -9  12  727.32   18.17
   1   9  13    5.23    8.86
   1  -9  14   87.24    9.89
   1   9  14   83.93   10.51
   1   9  15    4.79    9.51
   1   9  16    4.93   10.20
  -1  10  15   16.63   10.07
  -1  10  14  316.82   15.82
  -1 -10  13   28.14    7.80
  -1  10  13   59.21   10.24
  -1  10  12  227.58   12.83
  -1 -10  12  179.51   10.50
   1  10 -12  209.41   11.22
  -1 -10  12  195.61   10.86
  -1  10  11  298.23   13.28
   1  10 -11  270.76   11.90
  -1 -10  11  281.25   11.89
  -1 -10  11  292.82   11.35
   1  10 -10   15.88    6.25
  -1  10  10   20.12    7.56
   1  10  -9  376.95   12.18
  -1  10   9  372.24   12.80
  -1 -10   9  355.37   10.58
  -1 -10   9  354.99   12.13
   1 -10  -9  368.68   10.63
  -1  10   8  483.98    8.82
   1  10  -8  506.31   12.96
   1 -10  -8  485.42   11.56
  -1 -10   8  540.59   11.75
  -1 -10   8  503.36   12.96
  -1  10   8  543.35   13.97
   1  10  -7    6.76    5.67
  -1  10   7    3.99    5.74
  -1  10   7    5.05    3.10
   1 -10  -7   13.66    4.85
  -1 -10   7   -0.83    4.22
  -1 -10   6  719.85   11.66
  -1  10   6  698.58   13.72
   1 -10  -6  675.70   12.37
   1  10  -6  703.81   13.71
  -1  10   6  711.78   10.28
  -1 -10   6  699.59   13.45
  -1  10   5  282.68    6.90
  -1 -10   5  262.61    8.90
   1 -10  -5  259.07    8.47
  -1 -10   5  275.33    7.45
  -1  10   5  272.71    8.60
   1  10  -5  266.75    9.01
  -1 -10   4  153.31    7.38
  -1  10   4  151.31    6.97
   1  10  -4  164.33    7.35
  -1 -10   4  154.27    6.03
  -1  10   4  162.34    6.59
  -1  10   4  163.29    5.66
  -1 -10   3 1117.81   14.89
  -1  10   3 1165.38   13.10
  -1  10   3 1146.54   13.39
   1  10  -3 1170.26   14.97
  -1 -10   3 1142.27   12.35
  -1  10   3 1087.74   14.59
   1  10  -2  772.67   12.01
  -1  10   2  783.57   10.91
  -1 -10   2  783.97    9.95
   1 -10  -2  777.10   11.10
  -1  10   2  740.96    9.71
  -1  10   2  769.37   12.35
  -1 -10   2  749.33   12.20
  -1  10   1  693.24   11.92
  -1 -10   1  705.83    9.24
  -1  10   1  668.72    7.97
   1  10  -1  693.01   11.48
   1 -10  -1  713.54   10.88
   1  10  -1  707.05   11.37
   1 -10   0 3942.28   25.09
   1 -10   0 4009.87   16.57
   1  10   0 3980.22   24.98
  -1 -10   0 3889.52   21.20
  -1  10   0 3918.08   27.22
   1  10   0 3919.68   25.54
   1  10   1   -1.46    3.57
   1 -10   1    4.46    1.84
   1  10   1   -0.55    3.64
  -1 -10  -1   -1.51    3.12
   1 -10   1   -4.04    4.23
   1  10   2 3889.70   24.38
   1 -10   2 3771.06   13.85
   1  10   2 3756.85   23.23
   1 -10   2 3876.95   26.25
   1  10   2 3819.70   25.41
  -1  10  -2 3835.65   27.41
   1  10   3  103.78    5.67
   1 -10   3  118.68    3.03
  -1  10  -3   99.31    6.28
   1  10   3  120.32    5.71
   1 -10   3  108.39    6.73
   1  10   3  110.51    5.33
  -1  10  -4    6.73    4.67
   1  10   4   10.25    3.51
   1 -10   4    6.46    5.23
   1 -10   4   14.03    2.23
   1  10   4    7.52    4.49
   1 -10   5  400.45    6.54
  -1  10  -5  401.67   10.51
   1  10   5  396.26    8.38
   1 -10   5  400.28   10.92
   1  10   5  386.56   10.42
   1  10   5  410.83    9.62
  -1  10  -6   50.20    6.23
  -1 -10  -6   45.67    4.43
   1  10   6   53.58    4.45
   1  10   6   52.80    5.37
   1 -10   6   44.10    3.63
   1 -10   6   55.26    7.36
   1  10   6   43.39    6.34
   1 -10   7  165.67    9.40
  -1  10  -7  156.12    8.03
   1 -10   7  181.58    6.17
  -1 -10  -7  178.80    6.34
   1  10   7  173.18    7.32
   1  10   7  162.08    9.10
   1  10   8 1064.10   19.23
   1  10   8 1153.82   16.22
   1 -10   8 1134.73   14.74
  -1  10  -8 1070.68   17.72
  -1 -10  -8 1072.79   13.70
   1 -10   8 1112.07   19.10
  -1  10  -9  142.30    8.36
   1 -10   9  128.74    9.46
   1  10   9  149.20    9.80
   1 -10   9  147.86    6.91
   1  10   9  137.55    7.09
   1  10  10  186.51    7.98
  -1  10 -10  164.31    9.12
   1 -10  10  184.32   10.91
  -1  10 -11  112.17    8.38
   1  10  11   95.35    9.88
   1 -10  11   95.21    9.69
   1 -10  12   -6.85    8.55
   1  10  12   -5.62    8.99
   1 -10  13  217.96   12.59
   1  10  13  226.81   13.33
   1 -10  14  216.57   12.94
   1  10  14  207.72   14.22
   1 -10  15   10.74    7.93
   1  10  15  -20.39   10.65
  -1  11  15  143.44   12.96
  -1  11  14    8.16    9.37
  -1 -11  13  319.16   13.51
   1  11 -13  306.69   13.66
  -1  11  13  332.80   15.63
   1  11 -12   42.59    8.22
  -1 -11  12   49.65    8.83
  -1  11  12   39.97    9.59
   1  11 -11   66.52    8.48
  -1 -11  11   74.83    7.68
  -1  11  11   73.99    9.54
  -1 -11  11   68.03    8.93
  -1  11  10  299.17   13.09
  -1 -11  10  306.99   10.85
  -1 -11  10  333.73   12.67
  -1  11   9  333.98   12.46
   1  11  -9  317.32   11.95
  -1 -11   9  326.26   11.90
  -1 -11   9  331.16   10.36
   1 -11  -9  327.15   10.49
   1  11  -8  167.35    9.13
   1 -11  -8  153.35    7.84
  -1  11   8  157.27    9.18
  -1 -11   8  144.41    7.34
  -1 -11   8  149.29    8.92
   1  11  -7  402.55   11.93
  -1 -11   7  416.95   12.10
  -1 -11   7  455.08   10.20
   1 -11  -7  359.35   10.24
  -1  11   7  379.47    8.32
  -1  11   7  412.60   11.96
  -1  11   6    4.35    4.90
  -1 -11   6    8.58    4.21
   1  11  -6    0.15    5.57
  -1 -11   6    7.17    6.18
   1 -11  -6    6.23    4.91
  -1  11   5 1291.83   17.09
   1  11  -5 1315.20   18.26
  -1 -11   5 1285.17   17.83
  -1  11   5 1302.05   16.77
  -1  11   5 1365.21   14.73
  -1 -11   5 1337.76   14.88
   1 -11  -5 1287.33   16.81
  -1 -11   4  464.47    9.13
  -1  11   4  505.96   10.28
  -1  11   4  496.47    9.46
  -1 -11   4  477.33   11.43
   1  11  -4  453.63   11.26
  -1  11   4  489.64   10.82
  -1  11   3   63.50    4.71
  -1 -11   3   63.19    4.70
   1  11  -3   61.74    5.84
  -1  11   3   60.93    4.81
  -1 -11   3   50.89    6.05
  -1  11   3   41.31    5.07
   1 -11  -3   49.85    4.76
  -1  11   2   47.46    5.68
  -1  11   2   40.90    3.56
  -1 -11   2   41.70    4.17
  -1 -11   2   49.78    5.76
   1 -11  -2   44.18    4.76
   1  11  -2   39.20    5.09
   1 -11  -1 1748.22   17.40
  -1  11   1 1699.49   12.89
  -1 -11   1 1714.16   14.69
   1  11  -1 1743.77   18.54
  -1  11   1 1745.42   19.20
   1  11  -1 1739.35   18.46
   1  11   0  274.12    8.20
   1 -11   0  262.72    8.21
   1  11   0  276.76    8.07
  -1 -11   0  280.75    6.73
  -1  11   0  296.99    8.97
   1 -11   0  262.34    5.02
   1  11   1 3250.91   24.68
  -1 -11  -1 3210.56   21.13
   1 -11   1 3254.12   24.76
  -1  11  -1 3226.18   26.09
   1 -11   1 3338.84   14.42
   1  11   1 3244.44   23.59
   1 -11   2  625.20   12.12
  -1  11  -2  652.73   12.60
   1  11   2  651.43   11.07
   1  11   2  659.48   11.71
   1 -11   2  665.20    6.50
  -1 -11  -2  668.96   11.10
   1  11   2  640.04   10.42
   1  11   3  780.99   12.71
   1 -11   3  782.45    6.95
   1 -11   3  771.37   13.63
   1  11   3  779.56   11.83
   1  11   3  786.23   12.14
  -1  11  -3  776.94   13.80
   1  11   4  407.74   10.00
   1 -11   4  398.92   11.09
  -1  11  -4  392.80   10.58
   1  11   4  415.17    9.79
   1 -11   4  404.16    5.70
   1  11   4  388.73    8.94
   1  11   5   90.87    6.43
   1  11   5   77.88    5.20
   1  11   5   99.96    5.98
  -1  11  -5   91.35    7.00
   1 -11   5   97.80    3.83
   1 -11   5   86.99    7.48
  -1  11  -6  184.14    8.45
   1  11   6  200.37    7.61
   1  11   6  201.10    8.98
   1 -11   6  189.75    5.51
   1  11   6  198.77    6.72
   1 -11   6  196.26    9.68
   1  11   7  956.40   17.90
  -1  11  -7  943.86   16.95
   1  11   7 1015.18   15.30
  -1 -11  -7  952.15   13.34
   1 -11   7  988.88   18.26
   1 -11   8    8.24    7.34
   1  11   8    9.57    4.59
  -1  11  -8   13.19    5.88
   1  11   8   16.60    6.94
   1  11   9  622.01   16.65
  -1  11  -9  599.99   14.72
   1 -11   9  599.62   16.09
   1  11   9  651.29   13.17
   1 -11  10  139.21   10.36
  -1  11 -10  158.34    9.41
   1  11  10  137.05    7.31
   1  11  10  160.63   11.12
   1  11  11  179.41   12.19
   1 -11  11  173.24   11.54
  -1  11 -11  194.35   10.45
   1  11  12   88.48   10.77
   1 -11  12  104.77   10.32
   1  11  13   71.70   11.08
   1 -11  13   80.99   10.59
   1 -11  14   21.15    9.03
   1  11  14   22.56    9.96
   1 -11  15  108.80   10.77
   1  11  15  129.08   12.82
  -1  12  15   20.24   10.28
  -1  12  14   -2.97    9.18
   1  12 -13   52.61    9.28
  -1  12  13   51.07    9.83
  -1 -12  13   63.24    9.14
   1  12 -12    7.65    7.80
  -1 -12  12   12.16    8.30
  -1  12  12   10.54    8.92
  -1 -12  11  710.56   18.18
   1  12 -11  720.79   18.69
  -1 -12  10   -6.00    5.65
  -1  12  10    0.32    7.57
   1  12 -10   -4.83    7.05
  -1 -12   9  762.21   14.91
  -1 -12   9  746.62   17.10
  -1  12   9  740.66   17.42
   1  12  -9  791.49   17.97
   1 -12  -9  710.96   14.79
   1 -12  -8   86.55    7.00
  -1 -12   8   80.74    8.47
   1  12  -8   76.41    8.10
  -1  12   8   73.75    7.69
  -1 -12   8   78.53    6.17
  -1 -12   7  138.09    8.75
  -1  12   7  132.10    5.73
  -1 -12   7  147.12    6.70
   1 -12  -7  141.39    7.72
   1  12  -7  152.91    9.09
  -1  12   7  150.22    8.54
   1  12  -6   -4.05    5.84
  -1  12   6    7.24    3.77
  -1 -12   6    5.64    4.05
  -1  12   6    1.48    5.01
  -1 -12   6    4.84    6.46
   1 -12  -6    4.56    4.84
  -1  12   5  755.37   13.84
  -1  12   5  800.46   13.93
  -1  12   5  803.00   12.25
  -1 -12   5  779.45   11.97
  -1 -12   5  774.37   15.03
   1  12  -5  808.94   15.35
   1 -12  -5  738.10   13.91
   1  12  -4  220.32    8.83
  -1 -12   4  210.74    9.09
  -1  12   4  215.07    8.08
  -1 -12   4  232.90    7.21
  -1  12   4  234.75    7.98
  -1  12   4  234.14    7.42
   1 -12  -3 1127.32   14.72
  -1  12   3 1050.25   15.88
  -1  12   3 1088.84   13.49
  -1  12   3 1105.63   14.28
  -1 -12   3 1129.84   13.31
   1  12  -3 1140.73   16.66
  -1 -12   3 1046.65   16.24
  -1  12   2   42.22    3.72
   1  12  -2   37.65    5.71
  -1  12   2   44.74    5.61
   1 -12  -2   46.61    4.96
  -1 -12   2   47.36    6.30
  -1 -12   2   39.58    4.34
   1  12  -1 2142.68   21.30
   1 -12  -1 2181.83   15.49
  -1  12   1 2182.77   22.39
   1 -12  -1 2233.08   20.86
  -1 -12   1 2163.58   21.92
   1  12  -1 2262.78   22.20
  -1 -12   1 2289.81   17.53
   1  12   0    8.88    4.44
   1 -12   0   15.24    5.05
  -1 -12   0    4.92    3.57
  -1  12   0    9.02    5.29
  -1 -12  -1  403.55    8.52
   1 -12   1  419.38   10.72
  -1  12  -1  435.10   11.31
   1  12   1  415.12   10.21
   1 -12   1  449.85    6.06
   1  12   1  434.72   10.17
  -1 -12  -2  255.44    7.62
   1  12   2  279.71    8.39
   1  12   2  262.57    8.59
   1 -12   2  260.31    4.67
   1 -12   2  280.52    9.38
  -1  12  -2  263.99    9.40
  -1  12  -3  818.42   14.99
   1 -12   3  797.28    7.31
   1 -12   3  802.98   14.62
   1  12   3  809.19   12.93
   1  12   3  837.00   13.94
   1  12   3  844.41   13.22
   1  12   4    3.89    4.30
   1 -12   4   -2.88    2.06
   1  12   4   -0.14    4.09
  -1  12  -4    2.53    5.40
   1  12   4    1.23    4.40
   1 -12   4    0.84    6.65
   1  12   5 2762.28   24.85
   1  12   5 2750.37   26.24
   1 -12   5 2726.50   27.32
  -1  12  -5 2679.47   26.87
  -1  12  -6  131.12    8.36
   1  12   6  128.81    7.11
   1  12   6  107.57    8.02
   1  12   6  110.45    5.85
   1 -12   6  123.83    9.00
   1  12   7  407.61   12.42
  -1  12  -7  400.91   12.21
  -1 -12  -7  419.12    9.67
   1 -12   7  403.97   13.25
   1  12   7  410.42   10.64
   1  12   8   28.58    5.58
  -1  12  -8   19.27    6.10
   1 -12   8   20.95    7.94
  -1  12  -9   79.46    8.26
   1  12   9   87.87    9.23
   1 -12   9   97.97    9.75
   1  12   9  109.31    6.97
   1 -12  10   -9.81    8.49
  -1  12 -10    6.49    6.73
   1  12  10   -3.56    7.76
   1 -12  11  409.97   15.79
  -1  12 -11  428.55   14.29
   1  12  11  461.53   16.71
   1  12  12   20.02    9.37
   1  12  13  277.42   15.08
   1 -12  13  240.90   14.07
   1  12  14   -7.73   10.11
   1 -12  14  -10.07    9.12
   1 -12  15    0.04    8.40
   1  12  15    3.24   10.34
  -1  13  14    3.79    9.58
  -1  13  13  264.41   14.68
  -1 -13  13  238.02   13.31
   1  13 -13  225.46   13.09
  -1 -13  12   55.32    9.61
  -1 -13  11   62.21    9.48
  -1  13  11   57.86    9.84
   1  13 -11   66.41    9.71
  -1  13  10  418.46   14.85
  -1 -13  10  386.93   14.64
   1  13 -10  421.10   14.96
  -1  13   9  170.18   10.37
   1  13  -9  156.36   10.22
  -1 -13   9  155.16   10.94
   1 -13  -9  158.79    8.90
   1  13  -8    4.31    7.26
  -1 -13   8    6.90    4.93
   1 -13  -8   -0.92    5.52
  -1 -13   8   -3.75    8.04
  -1  13   8   10.26    6.29
  -1 -13   7  829.33   17.61
  -1  13   7  798.79   16.48
   1  13  -7  827.95   17.36
   1 -13  -7  821.28   15.51
  -1  13   7  824.19   12.89
  -1 -13   7  818.48   13.61
  -1 -13   6    4.75    4.11
   1  13  -6   10.93    6.52
  -1 -13   6   11.68    7.05
  -1 -13   5  739.38   11.97
  -1  13   5  701.02   13.67
  -1  13   5  742.49   12.65
  -1 -13   5  691.56   15.02
   1  13  -5  730.70   15.48
   1 -13  -4  696.41   12.41
   1  13  -4  669.57   14.28
  -1 -13   4  690.23   11.35
  -1  13   4  703.16   12.50
  -1  13   4  727.58   12.39
  -1 -13   4  713.36   14.99
  -1  13   4  677.66   13.59
  -1 -13   3   -1.47    4.09
   1 -13  -3    5.48    4.75
  -1  13   3    6.69    5.02
  -1 -13   3    9.84    6.40
   1  13  -3    2.98    5.53
  -1  13   3   10.72    3.61
  -1 -13   2  536.17   12.70
   1 -13  -2  531.20   11.34
   1  13  -2  575.47   12.70
  -1 -13   2  566.03    9.95
  -1  13   2  566.12   12.65
  -1  13   2  564.78    9.20
  -1  13   1  735.02   14.24
   1  13  -1  740.36   14.03
   1 -13  -1  720.84   13.37
  -1 -13   1  708.75   10.69
   1 -13  -1  724.94    9.53
   1  13  -1  734.72   13.52
   1  13   0    8.08    5.27
   1 -13   0    7.37    5.52
  -1 -13   0    1.76    3.80
  -1  13   0   11.94    5.70
   1  13   0    3.62    4.91
  -1 -13  -1 1958.61   17.90
   1 -13   1 2028.95   22.16
   1  13   1 1989.41   21.62
  -1  13  -1 2108.90   23.38
   1 -13   1 2131.34   13.26
   1  13   1 2019.73   20.93
   1  13   2   39.13    5.51
  -1 -13  -2   34.49    4.79
   1 -13   2   33.38    6.73
  -1  13  -2   29.01    6.05
   1  13   2   30.86    4.90
   1 -13   2   36.00    2.88
   1  13   3  307.59    8.59
   1 -13   3  318.57   10.74
  -1 -13  -3  300.76    8.85
   1  13   3  291.49    8.77
  -1  13  -3  300.17   10.59
   1  13   3  282.68    9.25
   1 -13   4  924.63   17.04
  -1  13  -4  923.10   16.80
   1  13   4  968.42   15.66
   1  13   4  923.77   14.39
   1  13   5   14.06    5.16
   1  13   5   10.39    4.42
   1 -13   5    3.13    7.09
   1  13   5   25.94    5.95
  -1  13  -6  279.44   10.87
   1  13   6  277.67   10.35
   1  13   6  318.56    9.84
   1  13   6  277.77    8.52
   1 -13   6  297.30   11.97
   1  13   7  951.89   18.25
  -1 -13  -7  924.74   14.37
   1 -13   7  941.76   19.16
  -1  13  -7  897.12   17.93
   1  13   7  934.12   15.99
   1  13   8  118.97    9.53
  -1  13  -8  119.17    9.08
   1 -13   8  142.71   10.67
   1  13   8  135.29    7.55
   1  13   9  441.85   11.79
  -1  13  -9  423.65   13.99
   1  13   9  447.25   14.80
   1  13  10  104.59    9.86
   1 -13  10   93.81   10.72
  -1  13 -10  115.98    9.34
   1  13  11   95.34   10.20
   1 -13  11  107.00   11.62
   1  13  12   67.65   10.28
   1 -13  12   69.89   10.49
  -1  13 -12   80.44    9.29
   1  13  13   64.93   11.14
   1 -13  13   65.03   10.49
   1 -13  14   23.11    9.61
   1  13  14   51.99   10.95
   1 -13  15  123.00   12.19
  -1  14  14  240.16   14.87
  -1  14  13    0.08    9.40
  -1 -14  13  -15.32    9.25
   1  14 -13   -2.93    8.39
   1  14 -12  136.14   12.25
  -1  14  12  114.99   11.42
  -1 -14  12  135.36   11.88
  -1 -14  11  128.51   11.83
  -1  14  11  117.67   11.16
  -1  14  10   -1.82    8.02
  -1 -14  10   11.68    9.31
   1  14 -10    9.42    8.64
   1 -14  -9   68.14    7.82
  -1 -14   9  100.79   10.47
   1  14  -9   75.37    9.25
  -1  14   9   89.70    9.04
   1  14  -8  781.28   18.81
   1 -14  -8  763.75   15.99
  -1  14   8  791.39   17.70
  -1 -14   8  764.77   17.91
   1  14  -7   26.88    7.57
   1 -14  -7   37.07    6.24
  -1 -14   7   50.82    8.68
  -1  14   7   36.67    6.87
  -1  14   7   40.22    5.07
  -1 -14   6  470.97   10.35
   1  14  -6  470.90   14.17
  -1 -14   6  458.38   13.93
  -1  14   6  492.87   10.97
  -1  14   6  479.98   12.62
   1 -14  -6  459.45   12.36
  -1 -14   5   26.04    4.71
  -1  14   5   30.64    5.86
   1  14  -5   34.42    7.06
  -1  14   5   33.48    4.82
   1 -14  -5   20.94    4.85
  -1  14   4  534.97   12.63
   1  14  -4  564.03   14.02
  -1  14   4  563.26   11.56
  -1 -14   4  551.37   10.66
   1 -14  -4  556.06   12.01
  -1 -14   4  521.80   13.94
  -1  14   3  621.53   13.67
   1 -14  -3  654.28   13.06
   1  14  -3  647.58   14.36
  -1 -14   3  660.59   11.20
  -1  14   3  633.50   10.99
  -1 -14   3  685.05   15.09
  -1  14   2  390.04   11.22
   1 -14  -2  397.16    8.39
   1 -14  -2  371.94   10.46
  -1  14   2  378.12    7.83
  -1 -14   2  381.42   11.50
   1  14  -2  401.12   11.55
  -1 -14   2  375.17    8.63
   1 -14  -1    6.17    5.61
   1 -14  -1    7.30    3.12
  -1 -14   1   13.44    6.21
  -1  14   1    7.51    5.58
   1 -14   0 1284.29   18.22
  -1  14   0 1270.19   18.98
   1 -14   0 1357.14   12.06
  -1 -14   0 1275.73   14.76
  -1 -14   0 1316.55   18.97
   1  14   0 1327.30   19.03
   1  14   0 1306.30   18.12
   1  14   1    5.34    5.54
  -1  14  -1   24.82    6.61
  -1 -14  -2 1026.56   14.43
  -1  14  -2 1018.56   17.71
   1 -14   2 1012.06   17.28
   1  14   2 1030.25   16.07
   1  14   2 1053.95   16.69
   1  14   3  461.21   11.19
  -1 -14  -3  513.09   11.49
   1  14   3  486.80   12.03
   1 -14   3  497.63   13.28
  -1  14  -3  487.55   13.03
   1  14   4   86.12    6.42
   1  14   4   87.81    7.22
  -1  14  -4   75.01    7.67
   1  14   4   80.42    6.54
   1 -14   4   86.45    8.28
   1 -14   5  167.01   10.22
   1  14   5  169.62    7.49
  -1  14  -5  183.30    9.75
   1  14   5  189.64    8.59
   1  14   5  174.82    8.45
   1  14   6  212.93    8.11
  -1  14  -6  203.42   10.37
   1  14   6  196.94    8.70
   1  14   6  208.12    9.82
   1  14   7   35.87    6.10
  -1  14  -7   38.19    7.39
  -1 -14  -7   26.10    5.05
   1 -14   7   51.81    8.99
   1  14   8  913.04   19.41
  -1  14  -8  921.71   19.36
   1  14   8  916.27   16.58
   1 -14   8  962.68   20.87
   1  14   9   11.42    5.29
  -1  14  -9   17.79    7.00
   1 -14   9    8.46    9.36
   1 -14  10  195.34   12.73
  -1  14 -10  201.94   11.71
   1  14  10  183.16   11.79
  -1  14 -11   69.17    9.62
   1  14  11   66.08   10.56
   1 -14  11   81.43   11.36
  -1  14 -12   -6.50    7.79
   1  14  12    9.56    9.78
   1 -14  12   16.82    9.90
   1 -14  13   46.91   10.44
   1  14  14   91.78   12.60
   1 -14  14  122.68   12.65
   1 -14  15   -4.84    9.53
  -1  15  14   -1.58    9.93
  -1 -15  13   17.54    9.21
  -1  15  13   -2.39    9.59
   1  15 -13   20.45    9.04
  -1 -15  12  189.55   12.94
  -1  15  12  193.33   13.30
   1  15 -12  209.56   13.70
  -1  15  11   10.62    8.42
  -1 -15  11   -5.02    9.78
   1  15 -11   -3.00    9.20
  -1 -15  10  491.77   17.66
   1  15 -10  491.65   17.36
  -1  15  10  485.70   16.60
  -1  15   9   17.59    7.55
   1 -15  -9    2.97    6.11
  -1 -15   9   21.59    9.04
  -1 -15   8  286.12   13.14
  -1  15   8  270.94   11.82
   1  15  -8  274.64   13.30
   1 -15  -8  261.00   10.67
  -1  15   7    6.87    5.91
  -1 -15   7   -1.11    8.32
   1 -15  -7   16.46    5.86
   1 -15  -6   36.44    6.65
  -1  15   6   41.78    5.46
  -1  15   6   49.68    6.80
  -1 -15   6   46.23    8.45
   1  15  -6   45.42    8.10
   1 -15  -6   37.32    5.64
  -1  15   5   49.05    6.10
  -1  15   5   33.73    6.08
  -1 -15   5   34.12    7.58
   1 -15  -4  583.86   12.89
  -1  15   4  635.50   12.15
  -1 -15   4  634.08   11.58
   1  15  -4  632.02   15.20
  -1  15   4  615.61   14.01
  -1 -15   4  612.58   15.45
   1  15  -3   -2.79    6.43
  -1  15   3    2.15    3.71
  -1 -15   3   -1.17    7.00
  -1  15   3   -1.73    5.75
  -1 -15   3    4.46    4.26
   1 -15  -3    5.69    5.55
   1 -15  -2 1876.09   22.36
   1 -15  -2 1942.40   17.72
  -1  15   2 1949.96   23.56
   1  15  -2 1819.74   23.24
  -1 -15   2 1894.63   24.27
  -1 -15   2 1985.53   18.78
  -1 -15   1  122.46    8.71
   1 -15  -1  123.48    7.82
   1 -15  -1   99.47    4.76
   1  15  -1  114.85    7.79
  -1 -15   1  105.09    5.77
  -1  15   1   95.82    7.72
  -1  15   0   22.94    6.45
   1  15   0    6.69    5.93
   1 -15   1    7.36    6.29
  -1 -15  -1   10.07    4.15
   1  15   1   13.36    5.60
  -1  15  -1    8.62    6.33
   1  15   1   22.49    6.07
   1  15   2  330.40   10.54
   1  15   2  336.85   11.00
  -1  15  -2  338.91   11.91
  -1 -15  -2  345.79    9.43
   1 -15   2  333.22   11.58
   1  15   3   92.70    7.49
   1 -15   3   81.30    8.55
  -1  15  -3   84.86    8.16
   1  15   3   75.22    6.75
  -1 -15  -3   95.89    6.64
   1  15   4 1784.01   20.99
   1  15   4 1782.26   22.72
  -1  15  -4 1752.17   24.41
  -1 -15  -4 1798.17   21.88
   1 -15   4 1724.11   24.43
   1  15   4 1749.49   20.85
   1 -15   5    3.05    7.86
   1  15   5    4.64    4.92
  -1  15  -5    3.71    6.80
   1  15   5   -2.83    5.85
   1  15   6  970.18   17.26
   1 -15   6  897.18   19.48
   1  15   6  980.72   18.05
   1  15   6  901.03   15.51
  -1  15  -6  918.12   19.35
   1  15   7   46.65    6.64
  -1 -15  -7   52.99    5.97
   1 -15   7   36.38    9.42
   1  15   7   48.22    7.46
  -1  15  -7   52.54    8.37
   1 -15   8   -1.56    9.34
  -1  15  -8    0.15    7.56
   1  15   8    6.72    5.68
   1  15   8  -13.63    7.38
   1 -15   9    8.43    9.76
  -1  15  -9   11.07    7.91
   1 -15  10  176.21   12.98
  -1  15 -10  185.92   11.76
   1  15  10  155.67   11.70
   1  15  11    9.20    8.72
   1 -15  11   16.86    9.68
  -1  15 -11    0.28    7.89
   1  15  12  249.27   14.68
  -1  15 -12  245.28   13.40
   1 -15  12  247.45   15.08
   1  15  13  -15.63   10.12
   1 -15  13   -0.90    9.85
   1  15  14  119.00   13.03
   1 -15  14   81.98   12.07
  -1  16  13    5.01    9.11
  -1 -16  13   23.53    9.96
   1  16 -12  165.38   13.05
  -1  16  12  158.59   12.52
  -1 -16  12  142.35   12.79
  -1 -16  11   83.08   11.88
  -1  16  11   73.73   10.11
   1  16 -11   96.96   11.25
   1  16 -10    9.73    9.20
  -1  16  10   21.12    8.38
  -1 -16  10   21.88    9.72
   1  16  -9  180.12   12.02
  -1  16   9  165.17   11.00
  -1 -16   9  159.18   12.10
   1  16  -8  257.05   13.00
  -1 -16   8  261.55   13.35
  -1  16   8  241.55   11.40
   1 -16  -8  250.00   10.98
  -1  16   7    5.74    6.13
  -1 -16   7    2.87    8.13
   1 -16  -7    7.36    6.10
   1  16  -7    0.09    7.89
   1  16  -6  600.84   16.76
   1 -16  -6  598.89   14.83
   1 -16  -6  573.74   13.31
  -1  16   6  579.93   14.01
  -1 -16   6  595.81   16.74
  -1  16   5   94.36    6.90
  -1  16   5   92.66    7.83
   1 -16  -5   77.95    7.05
   1  16  -5   95.22    9.17
  -1 -16   5  105.54    9.89
  -1 -16   4  206.45   11.28
   1 -16  -4  203.87    8.93
   1  16  -4  202.67   10.58
  -1  16   4  223.83    7.96
  -1  16   4  204.85    9.41
  -1  16   3  255.82    7.74
  -1 -16   3  268.34   11.75
   1  16  -3  284.55   11.36
   1 -16  -3  282.84    8.53
   1 -16  -3  258.16   10.05
  -1  16   3  274.61   10.84
  -1  16   2  267.76   10.87
   1 -16  -2  293.04    7.77
   1  16  -2  292.88   11.32
  -1 -16   2  293.00    8.55
   1 -16  -2  321.08   11.30
  -1 -16   2  307.50   12.05
   1 -16  -1  213.20    9.90
  -1 -16   1  210.04    7.41
  -1  16   1  220.58   10.21
   1  16  -1  247.20   10.40
  -1 -16   1  231.44   10.95
  -1  16   0  891.52   17.75
  -1 -16   0  852.14   17.44
   1 -16   0  901.46   17.34
   1  16   0  923.32   16.87
  -1 -16   0  895.39   13.42
   1  16   1   65.95    7.58
   1 -16   1   70.60    8.26
  -1 -16  -1   68.95    7.66
  -1 -16  -1   67.40    5.54
   1  16   1   47.27    6.80
  -1  16  -1   72.65    7.86
   1 -16   2  634.54   15.66
  -1 -16  -2  631.53   12.33
   1  16   2  607.70   13.77
  -1  16  -2  653.96   16.00
   1  16   2  650.00   15.27
  -1  16  -3  269.52   11.66
   1  16   3  255.68    9.88
  -1 -16  -3  271.50    9.44
   1  16   3  259.26   10.59
   1 -16   3  261.98   11.50
  -1  16  -4  306.90   12.45
   1 -16   4  312.71   12.66
  -1 -16  -4  327.36   10.92
   1  16   4  281.07   11.04
   1  16   5  499.14   13.68
  -1  16  -5  471.92   14.53
   1 -16   5  497.24   15.69
   1  16   5  496.69   12.33
   1  16   5  508.58   13.21
   1  16   6  431.72   11.76
   1 -16   6  432.71   15.24
   1  16   6  453.92   13.16
  -1  16  -6  434.07   14.90
   1  16   6  439.85   13.35
  -1  16  -7   75.09    9.06
   1  16   7   55.74    8.04
  -1 -16  -7   73.32    6.61
   1 -16   7   90.97   10.78
   1  16   7   84.02    7.84
   1  16   8  235.21   10.33
   1 -16   8  236.65   13.76
   1  16   8  246.90   11.98
  -1  16  -8  231.03   12.08
  -1  16  -9   16.92    8.13
   1 -16   9   -1.32    9.64
   1  16   9    5.83    8.07
  -1  16 -10  202.76   12.58
   1  16  10  193.81   12.31
   1 -16  10  230.31   13.95
   1  16  11   66.57   10.30
   1 -16  11   88.41   11.97
  -1  16 -11   62.78   10.09
  -1  16 -12   25.36    8.62
   1 -16  12   15.45   10.67
   1  16  12   17.04    9.70
   1  16  13  102.40   12.46
   1  17 -13  180.39   13.78
  -1 -17  13  194.07   14.17
  -1  17  13  195.07   13.58
  -1  17  12   25.27    9.06
  -1 -17  12   48.09   11.15
  -1  17  11   43.95    9.17
  -1 -17  11   33.77   10.48
   1  17 -11   45.93   10.15
  -1  17  10   55.38    8.87
   1  17 -10   45.07   10.49
  -1 -17  10   63.60   10.98
   1  17  -9   65.33   10.50
  -1 -17   9   73.61   11.06
  -1  17   9   78.49    9.12
  -1 -17   8  110.15   11.48
  -1  17   8  112.87    9.38
   1 -17  -8  103.64    8.73
   1  17  -8   94.61   10.50
   1 -17  -7  572.38   15.21
  -1 -17   7  581.18   17.99
   1  17  -7  600.57   17.87
   1 -17  -6   57.28    7.44
   1  17  -6   63.13    9.42
  -1  17   6   51.72    6.66
   1 -17  -6   62.86    6.92
  -1  17   5  275.82    9.82
  -1  17   5  266.93   11.05
  -1 -17   5  279.18   13.20
   1  17  -5  270.97   12.73
   1 -17  -5  242.70   10.05
  -1 -17   4   24.02    8.35
  -1  17   4   29.43    5.16
   1  17  -4   49.06    8.07
   1 -17  -4   33.97    6.64
   1 -17  -3   -1.28    6.54
  -1 -17   3    1.80    7.60
  -1  17   3   -3.95    6.57
   1  17  -3    1.86    6.91
  -1  17   2  443.05   13.49
   1  17  -2  424.65   13.36
   1 -17  -2  402.41   12.83
  -1 -17   2  440.90   14.53
   1  17  -1  697.40   16.30
  -1 -17   1  724.01   17.03
  -1  17   1  712.78   16.51
   1 -17  -1  714.08   16.17
  -1 -17   1  718.78   12.61
   1 -17   0    6.38    6.59
  -1 -17   0   13.32    4.65
  -1 -17   0    3.91    7.01
   1  17   1  925.72   18.28
   1  17   1  894.03   17.38
  -1  17  -1  895.01   18.46
  -1 -17  -1  891.19   18.22
   1 -17   1  918.56   18.87
   1  17   2   11.22    6.81
   1  17   2   10.51    5.97
  -1 -17  -2    5.58    4.85
   1 -17   3  659.76   17.04
   1  17   3  675.14   15.91
  -1  17  -3  661.81   17.06
   1  17   3  638.16   14.42
  -1 -17  -3  625.58   13.46
  -1  17  -4  127.86   10.01
   1 -17   4  117.11   10.27
  -1 -17  -4  112.54    7.96
   1  17   4   90.09    8.71
   1  17   4  103.28    7.38
  -1 -17  -5    3.14    6.26
   1  17   5    4.14    5.91
   1  17   5    1.04    6.40
  -1  17  -5   -1.89    7.52
   1  17   5    4.31    5.32
   1 -17   5  -10.63    8.82
   1  17   6  160.78    8.39
   1  17   6  158.15    9.52
  -1  17  -6  166.13   11.34
   1  17   6  176.77    9.81
   1 -17   6  172.44   12.39
   1  17   7  327.59   12.85
   1  17   7  314.39   11.77
  -1  17  -7  314.65   14.07
   1 -17   7  300.17   14.59
  -1  17  -8   11.10    8.50
   1  17   8   13.75    5.97
   1 -17   8    5.13   10.54
   1  17   8   16.91    7.86
  -1  17  -9  312.19   14.86
   1 -17   9  290.51   15.98
   1 -17  10   28.16   11.41
  -1  17 -10   34.66    9.46
   1  17  11   15.60    9.21
   1  17  12   64.07   11.08
  -1  17 -12   46.23    9.92
   1 -17  12   64.06   12.56
   1 -17  13    0.23   10.60
   1  17  13   20.59   10.13
  -1 -18  12   24.92   10.60
  -1  18  12    8.94    8.43
   1  18 -12   14.64    9.53
  -1 -18  11  287.22   16.08
  -1  18  11  276.91   14.03
   1  18 -11  300.93   16.19
   1  18 -10  -12.03    9.39
  -1  18  10   -0.68    7.62
  -1 -18  10   -6.99   10.37
  -1  18   9  314.59   13.21
   1  18  -9  318.33   15.91
  -1  18   8   -3.22    6.97
   1 -18  -8    6.36    6.85
   1  18  -8   -0.71    9.57
  -1 -18   8  -16.21    9.90
   1 -18  -7   12.04    7.02
   1  18  -7   19.14    8.95
  -1  18   7    2.16    6.07
  -1 -18   7    6.84    9.89
   1 -18  -6   29.51    7.32
  -1  18   6   33.97    6.37
  -1 -18   6   46.11   10.02
   1  18  -6   21.87    8.83
  -1  18   5  189.86   10.26
   1 -18  -5  170.08    9.41
   1  18  -5  184.72   11.60
  -1 -18   5  165.32   11.81
   1  18  -4   28.15    8.35
   1  18  -3 1256.21   22.65
  -1  18   3 1285.82   21.64
   1 -18  -3 1230.61   21.00
  -1 -18   3 1271.51   23.67
   1 -18  -2    4.12    7.10
  -1 -18   2    2.76    7.63
   1  18  -2    7.55    7.27
  -1  18   2    8.39    7.06
  -1  18   1  174.87   10.53
   1  18  -1  187.75   10.35
  -1 -18   1  178.99   10.87
   1 -18  -1  163.93   10.02
   1  18   0   -0.64    6.53
  -1 -18   0   13.30    7.82
   1 -18   0    6.92    7.34
  -1  18   0   -3.76    7.44
  -1 -18  -1   33.87    5.69
   1 -18   1   44.21    8.56
   1  18   1   41.43    7.24
  -1 -18  -2   13.69    6.95
   1  18   2   11.67    6.46
   1  18   2   14.30    7.14
  -1 -18  -2   13.77    5.21
  -1  18  -2   10.62    7.42
   1  18   3  944.55   19.50
   1 -18   3  941.32   20.62
  -1 -18  -3  934.76   16.36
  -1  18  -3  924.46   20.39
   1  18   3  897.15   17.47
   1  18   4   -8.32    7.31
  -1  18  -4    7.58    8.05
   1 -18   4  -14.25    8.81
  -1 -18  -4   -2.47    5.88
   1  18   5  576.55   15.58
  -1 -18  -5  588.63   15.02
   1 -18   5  611.71   18.18
  -1  18  -5  566.63   17.39
   1  18   6    5.74    6.16
  -1  18  -6   -7.40    8.10
   1  18   6   14.18    6.89
   1  18   6    1.10    6.91
   1 -18   6   -8.35    9.33
   1  18   7  178.86   10.58
   1  18   7  193.43   10.33
  -1  18  -7  161.33   12.12
   1 -18   7  204.98   14.27
   1  18   8    8.11    7.36
  -1  18  -8    7.36    8.87
   1 -18   8    0.84   10.75
   1  18   9   44.64    8.89
   1 -18   9   53.71   12.28
   1  18  10   12.47    8.51
   1 -18  10   18.34   10.67
  -1  18 -11  246.69   14.70
   1 -18  11  233.93   15.70
   1  18  11  211.23   13.41
   1  18  12    9.95    9.31
   1 -18  12    2.83   10.84
  -1  18 -12  -17.43    9.44
  -1  19  12   66.45   10.12
   1  19 -12   70.92   11.86
  -1  19  10   32.28    8.21
  -1 -19   9   64.48   11.57
   1  19  -9   66.83   11.04
  -1  19   9   51.49    8.24
   1  19  -8   93.72   11.40
  -1 -19   8   96.52   12.42
   1 -19  -7  348.25   13.47
  -1 -19   7  328.99   16.17
   1 -19  -6   39.06    7.86
   1  19  -6   42.73    9.69
  -1 -19   6   31.74   10.68
   1  19  -5  235.06   12.98
  -1  19   5  226.34   11.17
   1 -19  -5  199.38   10.60
  -1 -19   5  186.87   12.85
   1  19  -4  138.31   11.10
  -1  19   4  153.00    9.96
   1 -19  -4  156.72   10.14
  -1 -19   4  145.06   12.04
   1 -19  -3   60.26    8.60
  -1 -19   3   49.53    9.57
  -1  19   3   58.99    8.39
   1  19  -3   55.24    9.23
   1  19  -2  115.94    9.87
  -1 -19   2   96.46   10.23
  -1  19   2  103.46    9.40
   1 -19  -2  111.78    9.76
   1 -19  -1  328.39   13.48
   1  19  -1  343.14   13.17
  -1  19   1  373.38   13.51
  -1 -19   1  347.12   14.40
  -1 -19   0   68.51    9.17
   1  19   0   79.16    8.99
   1 -19   0   53.43    8.75
  -1  19   0   46.07    8.88
  -1 -19  -1  457.61   15.45
  -1  19  -1  492.41   15.81
   1 -19   1  479.82   16.04
   1  19   1  474.52   14.24
   1 -19   2  225.54   12.75
   1  19   2  195.76   10.55
  -1 -19  -2  185.90   11.34
  -1  19  -2  199.35   12.22
  -1 -19  -3  171.92   11.03
   1  19   3  148.94    9.63
  -1  19  -3  148.64   11.02
   1 -19   3  168.88   11.87
  -1 -19  -3  155.71    8.41
  -1 -19  -4  172.30    9.41
   1  19   4  142.20    9.05
   1 -19   4  161.59   12.22
   1  19   4  147.89   10.56
  -1  19  -4  188.20   12.23
  -1 -19  -4  193.02   11.56
  -1 -19  -5   47.98    7.23
  -1  19  -5   40.57    9.76
   1  19   5   38.90    7.02
   1 -19   5   47.16   10.37
   1  19   6  238.79   10.73
  -1 -19  -6  277.95   12.15
   1  19   6  256.90   12.12
  -1  19  -6  248.73   14.10
   1 -19   6  277.27   15.00
   1  19   7  264.54   12.14
  -1 -19  -7  246.44   12.26
   1 -19   7  244.04   15.08
  -1  19  -7  262.01   14.14
   1  19   7  252.45   11.83
  -1  19  -8    1.86    9.08
   1 -19   8    5.68   10.60
   1  19   8   -1.75    7.55
   1 -19   9  237.43   16.06
   1  19   9  196.89   12.03
  -1  19  -9  197.95   13.66
   1  19  10   -2.83    8.53
  -1  19 -10   13.31    9.97
   1 -19  10   13.31   10.81
   1  19  11  -10.34    8.98
  -1  19 -11   13.71    9.88
   1 -19  11   -9.00   12.00
  -1  19 -12   91.97   11.81
   1  19  12   72.85   10.54
  -1 -20  11   73.27   13.21
   1  20 -11   29.24   11.32
   1  20 -10   13.98   10.62
   1  20  -9   57.12   11.07
  -1 -20   8   98.52   12.67
   1  20  -8  114.02   12.80
   1  20  -7   13.61    9.42
  -1 -20   7  -16.07   10.93
   1 -20  -7   -9.89    6.88
   1  20  -6  582.36   19.13
   1 -20  -6  599.08   16.47
  -1 -20   6  557.84   19.34
   1  20  -5   54.62    9.89
  -1 -20   5   55.34   11.21
  -1  20   5   25.23    7.68
  -1 -20   4   49.43   10.48
   1  20  -4   48.47    9.66
   1 -20  -4   46.30    8.12
  -1  20   4   48.53    8.43
  -1  20   3  112.33    9.80
   1 -20  -3   87.95    9.53
   1  20  -3   99.23   10.20
  -1 -20   3  117.76   11.72
  -1 -20   2   29.27    9.31
  -1  20   2   16.85    7.89
   1  20  -2   31.91    8.55
  -1 -20   1  114.73   11.28
   1 -20  -1  109.68   10.56
   1  20  -1  135.02   10.76
  -1  20   1  123.03   10.04
   1 -20   0  468.43   16.15
  -1 -20   0  465.42   16.44
  -1  20   0  490.51   15.91
  -1 -20  -1   17.67    8.84
  -1  20  -1   -3.19    8.11
   1  20   1   13.94    7.80
   1 -20   1    8.14    9.02
   1  20   2  482.88   14.89
  -1  20  -2  478.38   16.53
  -1 -20  -2  528.89   17.03
   1 -20   2  506.92   17.29
  -1 -20  -3   24.86    8.50
   1 -20   3   29.63   10.05
  -1  20  -4    5.20    8.78
   1  20   4    2.55    6.50
   1 -20   4   12.33    9.82
  -1 -20  -5  137.76   10.76
  -1  20  -5  115.98   11.71
   1  20   5  131.68   10.72
   1  20   5  127.89    9.16
   1 -20   5  144.83   12.44
  -1 -20  -5  123.34    9.10
  -1 -20  -6  171.01   11.17
   1 -20   6  174.13   13.75
   1  20   6  182.52    9.78
  -1  20  -6  163.00   12.99
   1  20   6  157.82   10.83
  -1 -20  -6  182.29   10.64
  -1 -20  -7   -1.28    7.55
   1  20   7   -5.77    7.12
  -1  20  -7   12.68    9.28
   1 -20   8  174.45   15.26
   1  20   8  179.44   11.31
  -1 -20  -8  190.13   11.98
  -1  20  -8  218.95   14.55
  -1 -20  -9   -6.26    8.01
   1  20   9    1.78    7.61
  -1  20 -10  184.74   14.28
   1 -20  10  167.13   15.60
   1  20  10  187.51   12.81
   1  20  11   82.02   10.66
  -1  20 -11   62.29   11.45
  -1 -21  10  277.33   17.68
   1  21 -10  246.43   16.48
  -1 -21   9  -13.22   11.72
   1  21  -9    4.21   10.32
  -1 -21   8   99.65   12.91
   1  21  -8   79.28   12.01
   1 -21  -7   -1.13    7.23
  -1 -21   7   -4.68   11.33
   1  21  -7   11.52    9.73
   1  21  -6   32.14   10.03
  -1 -21   6   23.41   10.73
   1 -21  -5   13.55    7.87
  -1 -21   5    2.34   10.94
   1  21  -5   -7.14    9.60
  -1  21   5   -2.58    7.53
   1  21  -4  433.17   16.99
  -1  21   4  439.01   15.14
   1 -21  -4  420.28   15.16
  -1 -21   4  399.68   17.38
   1  21  -3   20.49    8.74
  -1  21   2  390.51   14.99
   1 -21  -2  382.95   14.89
   1  21  -2  386.89   15.57
  -1 -21   2  402.52   16.82
   1 -21  -1   13.01    8.72
  -1 -21   1   -4.35    9.43
  -1  21   1    4.99    8.17
   1  21  -1   10.08    8.31
  -1  21   0  131.72   11.27
   1 -21   0  137.19   11.34
   1  21   0  146.84   10.80
  -1 -21   0  142.62   12.42
   1  21   1   56.46    9.01
  -1  21  -1   53.51   10.03
   1 -21   1   64.30   10.30
  -1 -21  -1   56.73   10.40
  -1 -21  -2  185.76   12.60
  -1  21  -2  192.26   12.74
   1  21   2  196.95   11.39
   1 -21   2  196.58   13.71
  -1  21  -3    7.35    8.99
   1  21   3    8.35    6.69
   1 -21   3   21.28   10.34
  -1  21  -4  349.94   15.77
   1 -21   4  366.51   16.64
  -1 -21  -4  302.85   14.43
   1  21   4  320.83   12.85
  -1  21  -5    4.10    8.75
  -1 -21  -5   11.46    8.13
   1  21   5    8.43    6.49
   1 -21   5    0.55   10.42
   1  21   6  332.79   13.89
   1 -21   6  316.67   16.33
  -1  21  -6  299.59   15.45
  -1 -21  -6  289.44   13.64
  -1  21  -7   -4.50    9.73
   1 -21   7   17.59   11.81
   1 -21   8    8.37   11.72
  -1  21  -8    3.10    9.62
  -1  21  -9   -4.33   10.09
   1 -21   9  -10.50   12.66
  -1 -21 -10   82.54   10.16
  -1  21 -10   91.96   12.24
   1  21  10  114.23   10.82
   1  22  -8  143.05   14.19
  -1 -22   8  130.30   14.74
   1  22  -7   -1.56    9.44
  -1 -22   7   24.49   11.06
  -1 -22   6  224.72   16.07
   1 -22  -6  235.69   12.34
   1  22  -6  248.80   15.14
   1  22  -4   71.24   11.58
   1 -22  -4   60.23    9.47
  -1  22   4   62.69    9.50
  -1 -22   4   64.87   11.84
  -1 -22   3  173.51   13.88
  -1  22   3  161.24   11.63
   1  22  -3  188.14   13.20
   1 -22  -3  179.02   12.03
   1 -22  -2   13.53    8.68
   1  22  -1   35.25    8.82
  -1 -22   1   24.18   10.21
  -1  22   1   40.11    9.22
  -1 -22   0  222.49   14.05
   1  22   0  222.36   12.27
  -1  22   0  186.34   12.32
   1 -22   0  225.81   14.09
  -1  22  -1   -5.31    9.60
   1 -22   1    1.23   10.27
   1  22   1    8.26    7.79
  -1 -22  -1   13.40    9.44
   1 -22   2  274.61   15.26
  -1  22  -2  271.65   14.57
   1  22   2  309.73   13.61
  -1 -22  -2  292.07   15.05
  -1  22  -3  101.46   11.66
   1  22   3  108.74    9.74
   1 -22   3  154.79   13.66
  -1 -22  -3  140.10   11.85
  -1 -22  -4   -7.27    9.12
   1  22   4   11.56    7.06
  -1  22  -4    5.12    9.74
   1 -22   5   78.16   12.05
  -1 -22  -5   94.66   10.67
   1  22   5  103.25    9.03
  -1  22  -5  116.31   12.50
   1 -22   6   25.92   11.90
  -1 -22  -6   61.67    9.50
  -1  22  -8  253.52   16.15
   1 -22   8  235.88   17.22
  -1  22  -9    6.06   10.27
  -1 -23   7  236.97   16.77
   1  23  -7  241.27   16.00
   1 -23  -6   -6.74    7.84
   1  23  -6  -12.47   11.05
  -1 -23   6   -0.14   11.49
  -1 -23   5   80.28   12.38
   1 -23  -5  116.27   10.37
  -1  23   5   96.22    9.46
   1  23  -5   90.67   12.36
  -1  23   4   85.45   10.14
   1  23  -4  108.03   12.48
  -1 -23   4   87.40   12.88
  -1 -23   3   -3.18   10.53
   1  23  -3   -6.33    9.90
  -1  23   3    7.43    8.28
   1 -23  -3  -10.45    9.31
   1 -23  -2    7.55    9.14
  -1 -23   2   44.75   11.07
   1 -23  -1  182.84   13.22
   1  23  -1  194.28   13.06
  -1 -23   1  187.66   13.91
  -1  23   1  175.75   12.69
   1 -23   0   57.68   11.15
   1  23   0   49.18    9.59
  -1  23   0   43.08    9.72
  -1 -23   0   57.18   11.65
   1 -23   1  434.90   17.88
  -1  23  -1  467.59   17.71
   1  23   1  428.46   15.71
  -1 -23  -1  461.49   18.07
  -1 -23  -2    2.82    9.87
   1  23   3   91.44    9.46
   1 -23   3   83.83   12.66
  -1 -23  -3   70.91   11.00
   1 -23   4   57.98   11.48
   1  23   4   57.43    8.01
  -1  23  -4   45.33   10.54
  -1 -23  -4   71.50   10.67
   1  23   5    1.42    6.91
  -1  23  -5    3.53   10.07
  -1 -23  -5  -16.38    9.36
  -1  23  -6   21.12   10.61
   1 -23   6   11.72   11.56
  -1  23  -7  144.62   14.19
   1 -23   7  197.69   16.19
   1 -24  -6   -9.46    8.52
   1  24  -5  131.84   13.35
  -1  24   5  115.47   10.59
  -1 -24   5  139.39   14.53
   1 -24  -5  130.60   10.88
   1  24  -4    3.94   10.51
  -1 -24   4    5.15   11.56
  -1  24   4   -3.83    8.45
   1  24  -3  191.44   14.15
  -1 -24   3  205.03   15.67
   1 -24  -3  203.45   13.64
  -1  24   3  211.84   13.13
  -1 -24   2    0.62   10.70
  -1  24   2   10.78    9.04
   1  24  -2    7.65    9.68
   1 -24  -2   13.20    9.30
  -1 -24   1  257.71   16.12
   1 -24  -1  276.40   15.45
  -1  24   1  283.24   14.38
   1  24  -1  270.76   14.70
   1  24   0    7.22    8.47
   1 -24   0  -14.81   10.40
  -1  24   0   -8.98    9.24
  -1 -24   0   -9.70   10.30
  -1 -24  -1    2.26   10.63
   1 -24   1   22.28   10.67
  -1  24  -1    0.77    9.78
   1  24   2    6.47    7.79
   1 -24   2  -11.63   10.72
  -1 -24  -2    0.63    9.87
  -1 -24  -3  122.38   12.36
  -1  24  -3  128.93   13.45
   1  24   3  115.32   10.40
   1 -24   3  135.58   14.18
  -1 -24  -4    3.29    9.21
   1 -24   4   -9.01   10.33
  -1  24  -4   11.58   10.08
   1  24   4    1.29    7.35
   1 -24   5  254.95   16.88
  -1 -24  -5  238.11   14.33
  -1  24  -5  257.66   15.99
  -1  24  -6    2.98   10.14
   1 -25  -5  103.85   10.35
   1  25  -3    3.34   10.20
  -1  25   3  -13.96    9.20
  -1  25   2  111.86   11.13
  -1 -25   2  123.09   13.96
   1  25  -2  112.57   12.54
   1 -25  -2   82.01   10.67
   1  25  -1   66.69   10.89
   1 -25  -1   66.13   11.52
  -1  25   1   93.15   11.53
  -1 -25   1   78.42   12.97
   1 -25   0    8.75   10.48
  -1  25   0    4.88    9.41
   1  25   0   17.37    9.18
  -1 -25   0   12.02   10.69
  -1  25  -1  181.83   13.86
  -1 -25  -1  183.69   14.85
   1  25   1  157.69   11.99
   1 -25   1  199.20   15.36
  -1  25  -2    1.88   10.17
   1  25   2    2.74    7.99
   1 -25   2   24.21   11.28
   1  25   3   64.89    9.47
  -1  25  -3   68.82   11.54
   1 -25   3   49.38   11.68
  -1 -25  -4   60.25   10.83
   1  25   4   72.00    9.11
   1 -26  -1    5.03    9.95
   1 -26   0  116.00   13.46
  -2   0  17  -15.71   10.04
  -2   0  16   14.14    9.43
  -2   0  15    5.47    8.10
  -2   0  14  666.86   19.36
  -2   0  13    5.46    7.92
   2   0 -12  510.47   12.68
  -2   0  12  539.79   15.66
   2   0 -11    0.77    5.17
  -2   0  11   10.04    7.05
  -2   0  10  150.31    8.82
   2   0 -10  140.57    7.60
  -2   0   9    3.77    2.44
   2   0  -9   -4.35    4.76
  -2   0   9    1.63    5.66
  -2   0   8  585.90   12.48
  -2   0   8  614.06    7.67
   2   0  -8  583.95   11.66
  -2   0   7    5.50    4.52
   2   0  -7    2.33    4.63
  -2   0   6 2816.28   13.24
  -2   0   6 2734.59   21.46
   2   0  -6 2774.04   21.21
  -2   0   5    0.16    1.42
  -2   0   5    2.60    3.23
   2   0  -5    0.46    3.84
  -2   0   4 2224.82   16.02
  -2   0   4 2192.43    8.49
   2   0  -4 2239.28   17.09
   2   0  -3   -1.54    3.41
   2   0  -2   39.59    3.60
   2   0  -2   39.37    1.51
  -2   0   2   45.19    2.94
  -2   0   1    5.08    1.99
  -2   0   0 5730.76   16.37
   2   0   0 5569.78   17.54
   2   0   1    3.02    2.18
   2   0   2 6561.60   15.39
   2   0   2 6659.86   24.61
   2   0   3    1.14    2.18
   2   0   3    1.74    2.81
   2   0   4 2249.33   15.88
   2   0   4 2306.04   17.27
   2   0   5    3.35    3.15
   2   0   6  299.27    7.85
  -2   0  -6  289.63    3.42
   2   0   7    0.83    4.12
  -2   0  -7    1.55    1.48
   2   0   7    6.81    4.28
   2   0   8 1697.62   19.53
   2   0   8 1685.28   18.74
   2   0   9   -0.71    5.38
   2   0  10 1444.92   20.52
   2   0  10 1329.15   18.31
   2   0  11    7.82    5.07
   2   0  12  261.29    9.82
   2   0  12  288.42   11.75
   2   0  13    0.06    7.15
   2   0  13   -1.98    5.33
   2   0  14  117.70    8.37
   2   0  14  139.01   10.57
   2   0  15    2.56    7.92
   2   0  16  232.90   13.37
   2   0  17    2.60    8.45
  -2   1  17   14.37    9.95
  -2  -1  17  -10.86    9.64
  -2  -1  16  161.94   12.89
  -2   1  16  131.93   11.69
  -2  -1  15   79.53   10.57
  -2   1  15   83.35   10.74
  -2   1  14   24.29    8.58
  -2  -1  14   39.65    8.64
  -2  -1  13  214.37   12.05
  -2   1  13  201.44   11.76
   2  -1 -12  251.96    9.56
  -2  -1  12  255.71   12.26
   2   1 -12  249.42    9.89
   2  -1 -11  312.55   10.10
  -2  -1  11  305.87   12.11
   2   1 -11  302.93   10.01
  -2   1  11  304.04   12.01
  -2   1  10 1567.99   22.61
   2  -1 -10 1563.21   19.34
  -2  -1  10 1552.91   22.21
   2   1 -10 1519.95   19.17
  -2   1   9   74.57    7.07
   2  -1  -9   65.47    6.26
  -2   1   9   59.96    3.11
   2   1  -9   77.34    6.36
  -2  -1   9   66.30    3.85
  -2  -1   9   58.17    6.70
   2  -1  -8 1138.58   15.52
   2   1  -8 1143.41   15.51
  -2   1   8 1150.23   16.99
  -2  -1   8 1173.40   11.44
  -2   1   8 1158.61    9.45
  -2  -1   8 1131.93   16.51
   2   1  -7   67.63    5.69
  -2  -1   7   52.19    3.17
  -2   1   7   57.34    2.50
   2  -1  -7   51.01    5.69
  -2  -1   7   63.13    5.72
  -2   1   7   53.99    5.46
   2   1  -6  630.39   10.82
  -2  -1   6  647.90    7.21
   2  -1  -6  653.19   10.96
  -2   1   6  651.88    5.62
  -2   1   6  643.64   11.05
  -2  -1   6  653.11   10.94
  -2  -1   5 2463.84   18.59
  -2   1   5 2488.66    8.62
  -2  -1   5 2457.00   12.19
  -2   1   5 2495.54   18.95
   2   1  -5 2483.25   18.89
  -2   1   4 2290.15   16.40
   2   1  -4 2304.89   17.04
  -2  -1   4 2320.93   16.52
   2  -1  -4 2336.83   17.71
  -2  -1   4 2314.20   10.47
   2   1  -3   16.99    1.47
  -2  -1   3   21.60    2.90
  -2   1   3   24.96    2.79
   2  -1  -3   27.60    3.62
   2   1  -3   13.90    3.32
   2   1  -2 2190.21    9.66
   2  -1  -2 2161.63    6.94
   2  -1  -2 2240.80   14.94
   2   1  -2 2147.78   14.16
  -2  -1   2 2285.73   13.51
  -2   1   2 2217.75   12.70
   2   1  -1  146.92    3.17
   2  -1  -1  150.98    2.76
  -2   1   1  153.92    3.48
   2  -1  -1  153.04    4.25
  -2  -1   1  158.28    3.78
   2   1  -1  166.26    4.51
   2  -1   0 1298.52    8.91
   2  -1   0 1336.26    9.54
   2   1   0 1321.15    9.16
  -2  -1   0 1309.32    8.50
  -2   1   0 1336.46    7.60
   2   1   0 1276.19    9.11
   2  -1   1 3453.21   16.65
   2   1   1 3535.59   16.24
   2  -1   1 3616.94   14.13
   2   1   1 3491.02   12.63
  -2  -1  -1 3584.82   14.15
  -2   1  -2   12.83    1.75
   2  -1   2   13.75    1.79
   2   1   2   13.37    2.12
   2   1   2   20.36    2.72
   2  -1   2   15.04    1.82
   2  -1   2   21.99    3.23
   2  -1   3  904.29   10.53
  -2   1  -3  841.32    6.39
   2   1   3  904.78    9.48
   2   1   3  867.48    9.94
   2  -1   3  890.91    8.44
   2  -1   4 4840.32   22.10
  -2   1  -4 4610.19   15.01
   2   1   4 4778.41   23.93
   2   1   4 4633.81   24.14
   2  -1   4 4898.76   25.44
   2   1   5  222.59    6.56
   2  -1   5  232.01    6.86
   2   1   5  240.76    6.61
   2  -1   5  223.04    6.11
  -2   1  -5  223.43    3.73
   2  -1   6 1809.37   17.87
   2   1   6 1805.08   17.86
   2   1   6 1798.84   17.22
   2  -1   6 1769.03   16.80
   2   1   7   33.59    5.19
   2  -1   7   26.15    4.69
   2   1   7   23.86    4.33
  -2   1  -7   30.08    2.36
   2  -1   7   32.41    4.53
   2   1   8  390.91   10.77
   2  -1   8  417.83   10.27
   2   1   8  426.68    9.97
  -2   1  -8  372.09    5.66
   2  -1   8  403.21   10.07
   2  -1   9  696.21   13.50
   2  -1   9  700.71   13.58
   2   1   9  671.83   12.55
   2   1   9  683.97   14.17
   2  -1  10  107.93    7.29
   2   1  10  108.93    8.01
   2   1  10  110.74    6.92
   2  -1  10  105.95    7.28
   2   1  11   91.70    6.95
   2  -1  11  100.79    7.79
   2  -1  11   80.89    7.03
   2   1  11   89.35    8.30
   2   1  12  771.28   17.65
   2  -1  12  710.10   15.00
   2   1  12  741.33   14.85
   2  -1  12  807.39   17.66
   2   1  13   10.05    7.58
   2  -1  13    0.03    6.53
   2   1  13   11.57    5.62
   2   1  14  200.01   12.10
   2  -1  14  188.74   11.49
   2  -1  14  182.07    9.38
   2   1  15   67.70    9.75
   2  -1  15   53.51    9.42
   2  -1  16   -6.66    8.81
   2   1  16    0.15    8.48
   2   1  17   59.49   10.12
   2  -1  17   58.87    9.64
  -2  -2  17  170.35   13.62
  -2   2  17  168.57   13.44
  -2  -2  16    7.98    8.99
  -2   2  16   -2.82    9.11
  -2   2  15  155.25   12.14
  -2  -2  15  166.08   12.51
  -2   2  14  131.72   10.90
  -2  -2  14  119.31   10.76
  -2  -2  13   23.16    7.69
   2  -2 -12  188.80    8.58
  -2   2  12  197.55   11.13
  -2  -2  12  205.17   11.32
   2   2 -12  212.45    9.37
   2   2 -11  455.57   11.95
  -2   2  11  441.05   13.77
  -2  -2  11  451.21   13.69
   2  -2 -11  419.15   11.33
  -2  -2  10   86.34    7.69
  -2  -2  10   91.18    4.81
   2   2 -10  109.03    7.05
  -2   2  10   89.26    7.97
   2  -2 -10   78.13    6.62
  -2  -2   9 2221.03   17.55
  -2   2   9 2196.89   25.25
  -2  -2   9 2159.91   23.83
   2  -2  -9 2174.31   21.87
   2   2  -9 2164.12   21.80
  -2  -2   8   85.63    4.30
  -2  -2   8   90.47    6.68
   2   2  -8   89.02    6.44
  -2   2   8   95.02    7.37
   2  -2  -8   88.08    6.62
  -2   2   8   96.78    3.01
  -2   2   7  315.17    4.14
   2   2  -7  320.74    8.70
  -2  -2   7  318.82    9.03
  -2   2   7  335.02    9.45
  -2  -2   7  317.53    6.26
   2  -2  -7  303.71    9.22
   2   2  -6  119.22    6.06
  -2   2   6  119.14    2.20
   2  -2  -6  113.63    6.24
  -2  -2   6  125.24    4.11
  -2   2   6  128.98    6.10
   2   2  -5   75.16    4.77
  -2  -2   5   73.31    4.58
  -2   2   5   70.30    4.51
  -2  -2   5   69.35    3.02
   2  -2  -5   69.22    4.96
  -2  -2   4  613.20    6.33
  -2  -2   4  631.18    9.05
   2   2  -4  610.77    9.20
   2  -2  -4  638.33    9.78
  -2   2   4  624.65    9.06
  -2   2   3 1765.44   12.99
  -2  -2   3 1734.47   13.30
   2   2  -3 1771.83   14.07
   2  -2  -3 1763.39   14.56
   2   2  -3 1740.00    9.90
   2   2  -2 5076.64   21.36
  -2   2   2 5064.14   19.21
   2  -2  -2 4980.78   10.48
   2  -2  -2 5125.75   22.63
   2   2  -2 5084.84   16.63
  -2  -2   2 5189.44   20.52
  -2  -2   1 2381.38   12.74
  -2   2   1 2374.63   11.31
   2   2  -1 2380.41   13.38
   2   2  -1 2372.67   12.16
   2  -2  -1 2347.25   10.58
   2  -2  -1 2374.47   14.33
   2   2   0  569.79    6.06
   2   2   0  549.85    6.63
  -2   2   0  542.44    4.77
   2  -2   0  561.02    6.88
  -2  -2   0  552.87    6.05
  -2   2  -1   57.16    2.74
   2   2   1   63.33    3.14
   2   2   1   63.64    2.17
   2  -2   1   60.71    2.97
   2  -2   1   67.28    3.66
  -2   2  -1   57.72    1.79
  -2  -2  -1   58.96    2.77
  -2   2  -2 6227.71   20.23
   2   2   2 6182.41   22.26
   2   2   2 6173.86   12.60
   2  -2   2 6253.31   25.08
   2  -2   2 6335.96   16.34
   2   2   2 6208.09   24.14
  -2   2  -3 2964.74   14.08
   2   2   3 2990.67   17.53
   2  -2   3 2901.70   14.14
   2   2   3 2863.17   17.68
   2  -2   3 2928.41   19.00
  -2   2  -4  435.34    5.79
   2  -2   4  465.90    8.74
   2   2   4  490.41    8.52
   2  -2   4  479.93    7.14
   2   2   4  464.11    7.97
   2  -2   5 4255.16   26.24
   2  -2   5 4111.42   22.12
   2   2   5 4129.37   24.01
  -2   2  -5 4099.38   17.41
   2   2   5 4184.42   25.58
   2   2   6    6.34    4.06
   2  -2   6    8.61    4.38
   2   2   6    7.80    3.57
  -2   2  -7 3245.08   16.99
   2   2   7 3269.02   26.64
   2   2   7 3312.36   24.28
   2  -2   7 3281.53   25.62
   2  -2   7 3386.01   24.17
   2  -2   8  540.87   11.90
   2  -2   8  520.55   11.02
   2   2   8  501.56   11.89
   2   2   8  520.11   10.74
  -2   2  -8  518.22    7.44
   2  -2   9    3.40    5.03
   2   2   9   -0.72    5.70
   2  -2   9    4.41    4.89
  -2   2  -9   10.91    2.70
   2   2   9   11.39    4.68
   2  -2  10  166.72    8.08
   2   2  10  160.86    7.69
   2  -2  10  163.35    8.30
   2   2  10  179.29    9.21
   2   2  11  147.52    9.29
   2   2  11  134.38    7.44
   2  -2  11  122.32    8.20
   2  -2  11  130.02    7.95
   2   2  12   77.73    8.92
   2  -2  12   71.06    8.03
   2  -2  12   83.70    7.60
   2   2  12   65.01    6.54
   2   2  13  607.13   17.24
   2  -2  13  617.27   16.47
   2   2  13  562.68   13.71
   2   2  14   70.18    9.52
   2  -2  14   65.78    7.52
   2  -2  14   94.09    9.43
   2   2  16   52.00   10.25
   2  -2  16   18.93    8.26
   2   2  17   13.60    9.05
   2  -2  17   11.73    8.22
  -2  -3  17   16.33    9.44
  -2  -3  16    4.49    8.30
  -2  -3  15  183.24   12.59
  -2   3  15  187.53   12.80
  -2   3  14   15.39    8.23
  -2  -3  14   10.80    8.40
  -2   3  13  766.64   19.23
   2   3 -13  758.00   16.21
  -2   3  12    7.98    7.37
   2  -3 -12    9.46    5.54
   2   3 -12   21.10    5.84
  -2  -3  12    6.75    7.26
   2   3 -11  353.99   10.98
  -2   3  11  358.93   12.82
  -2  -3  11  336.27   12.27
   2  -3 -11  344.40   10.47
   2   3 -10   15.11    5.57
  -2  -3  10   11.91    6.08
  -2   3  10   15.71    6.19
  -2  -3   9  153.57    5.90
  -2  -3   9  157.71    8.08
   2  -3  -9  167.71    8.06
  -2   3   9  160.15    8.84
   2   3  -9  175.62    8.08
  -2   3   8   43.75    2.23
   2   3  -8   46.64    5.48
  -2   3   8   41.61    6.46
   2  -3  -8   48.41    6.13
  -2  -3   8   42.84    4.14
  -2  -3   7 2392.34   16.82
   2   3  -7 2358.73   21.08
  -2   3   7 2302.86    9.62
  -2   3   7 2348.06   22.82
  -2  -3   7 2276.93   21.24
   2  -3  -7 2317.76   21.37
  -2   3   6  406.30    9.45
   2   3  -6  382.81    8.72
  -2  -3   6  386.42    6.81
   2  -3  -6  399.78    9.56
  -2  -3   6  364.38    8.60
   2   3  -5 5513.69   28.04
  -2  -3   5 5408.91   21.66
  -2  -3   5 5329.53   27.31
   2  -3  -5 5529.24   29.39
  -2   3   5 5392.25   28.70
  -2  -3   4  459.91    7.90
   2   3  -4  470.31    8.24
  -2   3   4  481.13    8.20
  -2  -3   4  458.79    6.20
   2  -3  -4  488.96    8.76
   2   3  -3 2030.96   12.07
   2  -3  -3 2045.46   16.08
   2   3  -3 2014.66   14.93
  -2  -3   3 2055.11   14.65
  -2   3   3 2061.82   14.43
   2   3  -2   18.20    2.07
   2   3  -2   22.18    2.84
  -2   3   2   15.86    2.24
  -2  -3   2   14.24    2.92
   2  -3  -2   16.98    1.66
   2   3  -1  131.86    3.74
  -2  -3   1  134.75    3.95
   2   3  -1  143.35    3.90
   2  -3  -1  144.08    4.55
   2  -3  -1  131.18    3.24
  -2   3   1  140.63    3.15
   2   3   0  478.89    6.58
  -2   3   0  458.53    4.25
   2  -3   0  479.03    6.88
  -2  -3   0  470.37    6.03
   2  -3   0  454.14    6.21
   2   3   0  486.41    5.71
  -2   3   0  488.97    6.90
   2  -3   1 1928.63   13.10
   2   3   1 1897.47   13.35
   2   3   1 1920.71    9.42
  -2   3  -1 1905.60   12.83
  -2  -3  -1 1900.15   11.93
   2  -3   2  525.02    8.01
   2   3   2  519.87    7.09
   2   3   2  519.78    7.61
   2   3   2  508.90    4.30
   2  -3   2  511.64    4.25
  -2   3  -2  526.55    7.04
   2   3   3 3330.08    9.38
   2   3   3 3272.38   19.49
  -2   3  -3 3340.48   16.89
   2  -3   3 3319.03   13.93
   2  -3   3 3330.40   20.17
   2   3   3 3352.98   19.44
   2  -3   4  337.95    5.81
   2   3   4  353.58    7.28
  -2   3  -4  349.68    5.98
   2   3   4  358.82    7.75
   2  -3   4  362.35    7.91
   2  -3   5    5.72    2.66
   2   3   5    0.15    3.67
   2   3   5    7.47    3.29
   2   3   6  148.65    5.92
   2   3   6  115.84    6.20
   2  -3   6  130.02    6.64
   2  -3   6  149.06    5.44
  -2   3  -6  130.50    4.34
   2  -3   7 1395.88   17.54
   2   3   7 1368.82   15.97
  -2   3  -7 1324.05   12.22
   2  -3   7 1360.41   15.45
   2   3   7 1343.42   17.63
   2   3   8  185.53    8.57
   2   3   8  166.98    6.97
  -2   3  -8  179.20    5.30
   2  -3   8  185.78    7.33
   2  -3   8  174.60    8.28
   2   3   9 2219.28   25.29
   2  -3   9 2226.40   22.45
   2   3   9 2140.66   21.54
  -2   3  -9 2166.51   16.76
   2  -3   9 2126.03   23.45
   2  -3  10    3.03    5.57
   2   3  10   -1.35    4.63
   2   3  10    4.47    6.09
   2  -3  10   -2.16    4.70
   2   3  11  738.76   17.05
   2   3  11  744.22   14.39
   2  -3  11  742.27   15.43
   2  -3  11  696.35   15.11
   2   3  12    5.61    7.10
   2   3  12   -5.32    5.35
   2  -3  12   -4.01    6.21
   2  -3  12   -2.26    6.71
   2   3  13   -1.16    5.49
   2  -3  13   -0.38    7.01
   2  -3  13    9.05    6.32
   2   3  14   11.07    8.37
   2  -3  14   32.48    6.90
   2  -3  14   18.52    7.26
   2   3  15  198.10   12.61
   2  -3  15  208.63   11.97
   2   3  16   15.25    9.25
   2  -3  16   13.76    7.86
   2   3  17  159.78   12.96
  -2  -4  17  134.05   12.04
  -2   4  16   39.83    9.77
  -2  -4  15  155.36   11.63
  -2   4  15  149.31   12.20
  -2  -4  14  189.25   12.10
  -2   4  14  193.95   12.74
  -2   4  13    7.14    8.07
   2   4 -13   -0.85    6.10
  -2  -4  13    5.99    7.93
   2   4 -12  208.20    9.76
   2  -4 -12  189.33    8.88
  -2   4  12  196.30   11.31
  -2  -4  12  189.41   11.25
  -2  -4  11  570.68   14.87
  -2   4  11  552.00   15.53
   2   4 -11  602.09   13.75
   2  -4 -11  608.67   13.30
  -2  -4  10  145.55    8.67
   2  -4 -10  153.10    8.09
  -2  -4  10  177.00    6.78
   2   4 -10  183.74    8.47
  -2   4  10  163.48    9.65
  -2  -4   9  676.04   11.06
  -2   4   9  655.95   14.82
  -2  -4   9  671.91   13.92
   2   4  -9  681.10   13.36
   2  -4  -9  707.43   13.76
  -2   4   8  228.90    9.41
  -2  -4   8  240.99    8.97
  -2  -4   8  230.22    6.96
   2  -4  -8  256.72    9.38
   2   4  -8  238.12    8.49
   2   4  -7  979.77   14.25
   2  -4  -7  988.24   14.63
  -2  -4   7  950.81   14.04
  -2   4   7  969.11   15.30
  -2  -4   7  938.75   11.50
  -2   4   6 1057.84   14.86
  -2  -4   6 1017.54   13.39
   2   4  -6 1050.97   13.84
  -2  -4   6 1029.88   11.19
   2  -4  -6 1077.89   14.60
  -2  -4   5  594.85    9.84
  -2  -4   5  560.31    7.92
   2  -4  -5  579.84   10.35
   2   4  -5  580.49    9.84
  -2   4   5  576.69   10.24
  -2  -4   4   88.56    4.66
   2   4  -4   87.18    4.68
  -2   4   4   83.77    4.32
   2  -4  -4   92.01    4.87
  -2  -4   4   80.61    3.59
   2   4  -3 3543.94   17.54
   2   4  -3 3593.25   20.23
  -2  -4   3 3629.49   19.89
  -2   4   3 3655.97   19.71
   2  -4  -3 3654.38   21.33
   2  -4  -3 3593.95   10.69
   2  -4  -2 2108.23   15.79
   2  -4  -2 2083.75    9.84
   2   4  -2 2081.53   14.26
   2   4  -2 1994.26   13.03
  -2  -4   2 2092.39   14.18
  -2   4   2 2044.17   13.12
   2  -4  -1 4035.36   20.78
  -2  -4   1 4062.96   18.09
  -2   4   1 3988.43   15.04
   2   4  -1 4033.89   18.08
  -2   4   1 4085.81   20.64
   2  -4  -1 3966.94   15.83
   2   4  -1 4010.15   18.40
   2   4   0 6599.84   24.51
  -2   4   0 6595.57   25.84
   2   4   0 6519.65   20.94
   2  -4   0 6679.62   22.98
  -2   4   0 6571.17   14.88
  -2  -4   0 6681.95   22.53
   2   4   1  182.06    3.54
   2   4   1  168.15    4.81
   2  -4   1  183.52    5.03
  -2  -4  -1  160.20    4.34
  -2   4  -1  173.03    4.88
   2  -4   2   44.83    3.67
   2   4   2   60.55    3.60
   2   4   2   44.23    1.90
   2   4   2   45.95    3.12
  -2   4  -2   48.08    3.20
  -2   4  -2   51.00    1.27
   2   4   3 1043.02   11.46
  -2   4  -3 1025.74   10.75
   2  -4   3  987.38    7.05
   2   4   3 1025.42    6.61
   2   4   3  972.80   11.26
   2  -4   3 1018.43   11.82
   2  -4   4 1086.78   13.11
   2  -4   4 1074.17    9.32
   2   4   4 1076.43   12.50
   2   4   4 1107.66    5.98
   2   4   4 1128.08   13.26
  -2   4  -4 1089.92   10.99
   2   4   5 4777.79   28.84
   2   4   5 4656.04   26.75
  -2   4  -5 4538.14   22.51
   2  -4   5 4595.50   21.84
   2  -4   5 4759.76   28.32
   2  -4   6   76.80    6.23
   2   4   6   68.16    4.79
   2  -4   6   75.78    4.42
  -2   4  -6   73.18    3.98
   2   4   6   67.51    5.61
   2   4   7  487.05   11.47
   2  -4   7  530.33   11.83
   2   4   7  504.80   10.44
   2  -4   7  512.30    9.71
  -2   4  -7  499.72    8.48
   2   4   8  370.07   11.12
   2   4   8  355.15    9.28
   2  -4   8  380.32    9.43
   2  -4   8  362.37   10.70
  -2   4  -8  362.11    7.72
  -2   4  -9  102.25    5.07
   2   4   9  112.95    8.09
   2   4   9   89.97    6.36
   2  -4   9   95.18    6.49
   2  -4   9   96.58    7.48
   2   4  10  294.87   11.22
   2   4  10  273.43    9.25
   2  -4  10  292.57    9.72
   2  -4  11  449.18   13.24
   2   4  11  470.29   14.33
   2   4  11  492.13   12.27
   2  -4  11  474.42   12.42
   2   4  12   28.95    5.58
   2   4  12   20.08    7.53
   2  -4  12   17.56    5.88
   2   4  13  347.73   14.02
   2  -4  13  336.84   12.65
   2  -4  13  346.12   13.02
   2   4  13  332.53   11.01
   2  -4  14   17.42    7.42
   2   4  14   13.07    8.63
   2   4  15   72.96   10.27
   2  -4  15   98.98    9.81
   2   4  16   67.76   10.68
   2   4  17   12.90    9.51
  -2   5  16  152.83   12.73
  -2  -5  16  138.80   12.12
  -2   5  13  209.45   12.61
  -2  -5  13  193.04   11.59
   2   5 -13  198.79   10.21
  -2   5  12  195.50   11.25
   2   5 -12  180.42    9.72
  -2  -5  12  177.55   10.92
  -2  -5  11    3.28    6.67
  -2   5  11   17.24    7.20
   2   5 -11    7.60    5.95
  -2  -5  11    7.16    4.51
   2  -5 -11   11.52    5.71
  -2   5  10 1042.57   19.20
   2   5 -10 1104.21   17.67
   2  -5 -10 1047.98   16.84
  -2  -5  10 1011.67   18.04
  -2  -5  10 1089.60   15.07
   2   5  -9    8.16    5.53
  -2   5   9   15.57    6.29
   2  -5  -9   13.38    5.81
  -2  -5   9   12.67    5.78
   2  -5  -8 1327.51   17.69
  -2   5   8 1320.74   19.25
   2   5  -8 1315.12   17.34
  -2  -5   8 1302.14   17.51
  -2  -5   7 1252.05   15.92
   2  -5  -7 1245.12   16.62
  -2  -5   7 1260.42   14.05
  -2   5   7 1205.48    6.75
  -2   5   7 1256.05   17.56
  -2  -5   6  150.11    6.53
  -2   5   6  162.47    7.06
  -2   5   6  165.47    2.52
  -2  -5   6  156.70    5.58
   2   5  -6  142.53    6.65
   2  -5  -6  141.82    6.93
   2  -5  -5  514.50   10.05
   2  -5  -5  518.08    4.30
  -2  -5   5  502.27    9.21
   2   5  -5  526.99    9.82
  -2  -5   5  536.09    8.48
  -2   5   5  534.33   10.28
  -2  -5   4  888.01    9.96
   2  -5  -4  868.02    5.90
  -2  -5   4  867.34   11.18
   2   5  -4  889.59   11.46
  -2   5   4  903.78   11.75
   2  -5  -4  924.14   12.00
   2  -5  -3  605.36    5.56
   2   5  -3  605.22    8.21
  -2   5   3  602.88    8.75
   2   5  -3  587.55    8.82
   2  -5  -3  615.93    9.56
  -2  -5   3  628.16    8.98
   2   5  -2 2508.79   16.19
  -2   5   2 2513.94   15.12
   2  -5  -2 2529.75   18.00
  -2  -5   2 2603.67   16.15
   2   5  -2 2445.28   15.55
   2  -5  -2 2532.94   12.32
   2   5  -1  254.60    5.15
   2  -5  -1  235.45    4.63
  -2  -5   1  235.14    5.14
  -2   5   1  233.28    4.16
  -2   5   1  244.69    6.03
   2   5  -1  226.47    5.25
   2   5   0 1087.27    9.35
   2   5   0 1056.54   10.77
   2  -5   0 1114.36   10.09
  -2   5   0 1132.46   11.72
  -2   5   0 1068.09    6.39
  -2  -5   0 1092.80    9.89
   2   5   1  250.96    4.38
  -2  -5  -1  240.06    5.27
  -2   5  -1  224.61    5.85
   2  -5   1  242.55    5.70
   2   5   1  245.97    5.81
   2   5   2  896.75   10.93
   2  -5   2  903.78   10.85
   2   5   2  911.14   10.20
   2   5   2  962.86    7.71
  -2   5  -2  980.27   11.06
   2   5   3  471.16    8.24
   2  -5   3  451.91    4.28
   2   5   3  462.36    8.47
   2   5   3  488.58    5.44
  -2   5  -3  498.47    8.41
   2  -5   3  471.74    8.84
   2   5   4 3189.32   21.83
  -2   5  -4 3175.36   20.05
   2   5   4 3200.64   22.33
   2  -5   4 3184.00   22.45
   2   5   4 3118.63   12.95
   2  -5   4 3059.88   14.64
   2  -5   5   16.08    2.75
   2   5   5   19.67    3.78
  -2   5  -5   18.33    3.33
   2  -5   5   19.12    5.09
   2   5   5   17.66    4.52
  -2  -5  -5   15.85    1.69
  -2  -5  -6 2312.19    9.44
   2   5   6 2371.42   22.57
   2   5   6 2306.55   20.37
   2  -5   6 2413.71   17.57
  -2   5  -6 2391.85   18.31
   2  -5   6 2425.36   22.31
   2   5   7  819.25   13.09
   2  -5   7  861.85   11.97
   2  -5   7  850.55   14.54
  -2   5  -7  837.54   11.55
   2   5   7  784.54   14.28
   2  -5   8  770.56   12.46
   2   5   8  713.93   14.77
   2   5   8  742.54   13.05
   2  -5   8  693.07   14.18
  -2   5  -8  727.63   11.22
   2   5   9  194.19    9.48
  -2   5  -9  176.67    6.51
   2  -5   9  175.17    7.33
   2   5   9  190.13    7.85
   2  -5   9  174.77    9.02
   2   5  10  132.65    9.15
   2   5  10  145.72    7.52
   2  -5  10  129.63    7.35
   2  -5  10  142.05    9.33
  -2   5 -10  137.46    6.17
   2  -5  11  203.72    9.98
   2   5  11  202.25   10.97
   2   5  11  192.15    8.40
   2  -5  11  205.33    8.98
   2  -5  12  377.76   12.13
   2   5  12  368.38   13.89
   2   5  12  353.80   11.07
   2  -5  12  337.67   12.51
   2  -5  13    4.37    7.16
   2   5  13    0.53    7.80
   2  -5  14  302.61   12.76
   2   5  14  293.66   14.34
   2   5  15   58.06   10.19
   2  -5  15   63.27    8.35
   2   5  16    9.05    9.60
  -2  -6  17    7.18    8.61
  -2  -6  16   75.53   10.88
  -2   6  16   43.61   10.07
  -2  -6  15   -4.05    8.04
  -2   6  15   -3.88    9.94
  -2  -6  14  347.79   14.91
  -2   6  14  349.58   15.30
  -2  -6  13   12.83    7.50
  -2   6  12  777.72   18.93
   2   6 -12  767.84   16.88
  -2  -6  11   -2.36    6.51
  -2  -6  11    0.16    4.73
  -2   6  11    6.68    7.28
   2   6 -11   -0.27    6.08
   2   6 -10   50.13    6.65
  -2  -6  10   46.59    5.55
  -2  -6  10   37.60    6.44
   2  -6 -10   35.47    6.56
  -2   6  10   46.89    7.76
   2  -6  -9   79.46    6.98
   2   6  -9   73.44    6.78
  -2  -6   9   75.58    6.85
  -2   6   9   94.92    8.10
  -2  -6   9   73.03    5.81
   2   6  -8  584.67   12.35
  -2   6   8  575.79   13.28
  -2  -6   8  576.68   12.49
   2  -6  -8  546.38   12.38
  -2  -6   8  593.70   11.19
  -2  -6   7    4.77    4.81
   2   6  -7    3.28    4.72
  -2  -6   7    3.61    4.31
  -2   6   6 2737.62   11.28
  -2  -6   6 2774.99   20.36
  -2  -6   6 2733.57   22.13
  -2   6   6 2773.25   24.18
   2   6  -6 2800.48   22.98
   2  -6  -6 2758.72   23.02
  -2  -6   5   22.34    4.43
   2   6  -5   17.79    4.34
  -2  -6   5   14.73    3.46
  -2   6   5   24.77    4.19
   2  -6  -5   19.30    1.85
   2  -6  -5   25.16    4.68
  -2  -6   4 1290.40   12.92
   2  -6  -4 1307.33   14.76
   2  -6  -4 1310.36    8.70
  -2   6   4 1326.25   14.48
   2   6  -4 1289.62   14.13
  -2  -6   4 1367.67   13.97
   2   6  -3  225.05    5.81
  -2  -6   3  212.52    6.14
   2  -6  -3  212.01    4.09
  -2   6   3  201.42    5.58
   2   6  -3  217.63    6.04
   2  -6  -3  214.18    6.69
  -2  -6   2  238.60    5.80
   2  -6  -2  252.11    6.88
   2   6  -2  234.23    5.77
  -2   6   2  237.12    6.57
   2  -6  -2  219.16    4.49
   2   6  -2  225.51    5.75
  -2   6   2  230.01    5.24
  -2   6   1   46.63    3.96
  -2  -6   1   46.52    3.29
  -2   6   1   41.57    2.34
   2   6  -1   42.56    3.14
   2  -6  -1   50.41    3.02
   2   6  -1   44.40    3.43
  -2   6   0 2978.44   10.43
   2   6   0 2986.83   16.32
   2  -6   0 3049.18   17.53
   2   6   0 2961.57   18.73
  -2  -6   0 3035.32   17.15
   2   6   1  364.06    5.72
  -2  -6  -1  377.27    6.70
  -2   6  -1  404.77    8.00
   2  -6   1  379.34    7.16
   2   6   1  352.52    7.09
   2   6   2 7029.50   29.03
   2   6   2 6925.30   30.92
   2   6   2 7176.45   23.22
  -2   6  -2 7295.56   31.45
   2  -6   2 7157.18   30.40
   2   6   3  157.82    5.57
   2  -6   3  142.05    2.04
  -2   6  -3  151.84    5.55
   2  -6   3  144.03    6.05
   2   6   3  140.19    3.67
   2   6   3  152.34    5.70
  -2   6  -4 1595.05   15.40
   2   6   4 1537.87   16.17
   2   6   4 1546.11   16.17
   2  -6   4 1515.47    9.62
   2   6   4 1531.40   10.56
   2  -6   4 1486.54   16.25
   2   6   5   26.39    2.12
   2   6   5   27.84    4.34
   2  -6   5   23.00    2.69
   2   6   5   27.96    4.66
  -2   6  -5   20.05    3.84
   2  -6   6   29.14    5.96
   2   6   6   26.05    4.55
  -2   6  -6   19.40    3.82
   2  -6   6   15.49    3.12
  -2  -6  -6   16.23    2.07
   2   6   7  130.24    7.83
   2   6   7  123.19    6.55
  -2  -6  -7  128.97    3.22
   2  -6   7  142.04    8.14
   2  -6   7  136.48    5.40
  -2   6  -7  118.24    5.71
  -2   6  -8 1691.64   17.59
   2   6   8 1645.20   21.90
   2  -6   8 1595.99   20.70
   2   6   8 1648.86   19.16
   2  -6   9   39.76    5.28
   2   6   9   33.11    5.47
   2   6   9   21.04    6.18
  -2   6  -9   38.51    4.71
   2  -6  10  931.57   18.14
   2   6  10  993.03   19.20
   2   6  10  979.89   16.17
  -2   6 -10  959.56   14.34
   2   6  11   35.85    6.09
   2  -6  11   36.96    7.81
   2   6  11   28.33    7.60
   2   6  12   45.22    6.26
   2  -6  12   36.37    8.11
   2  -6  13  -11.18    7.62
   2   6  13    0.84    7.70
   2   6  14   87.52   10.78
   2  -6  14   73.84    8.87
   2   6  15   -8.30    8.78
   2  -6  15   -1.24    7.19
   2   6  16  293.44   15.62
  -2  -7  16  220.91   13.55
  -2   7  16  197.55   14.37
  -2   7  15   61.13   10.90
  -2  -7  15   28.94    8.49
  -2  -7  14   12.79    7.86
  -2  -7  13  237.65   12.69
   2   7 -13  221.55   11.29
   2   7 -12   66.98    7.93
  -2  -7  12   79.54    8.78
  -2  -7  11   89.43    8.44
  -2  -7  11   81.86    7.04
  -2   7  11  105.44    9.40
   2   7 -11  104.52    8.40
   2  -7 -11  100.19    7.80
   2  -7 -10  703.36   14.58
   2   7 -10  675.27   15.06
  -2  -7  10  686.62   13.61
  -2   7  10  682.72   16.16
  -2  -7  10  671.74   15.07
   2   7  -9   13.11    5.72
  -2  -7   9    4.76    5.54
   2  -7  -8 1190.54   17.38
   2   7  -8 1195.41   17.83
  -2  -7   8 1236.58   17.26
  -2  -7   8 1218.04   16.03
  -2   7   8 1268.36   19.28
  -2  -7   7  491.90   10.85
  -2   7   7  485.27    5.63
   2   7  -7  499.05   11.56
  -2  -7   7  507.64   10.50
   2  -7  -7  501.50   11.51
  -2   7   7  519.46   12.10
   2   7  -6  106.29    6.57
  -2  -7   6  100.90    5.92
  -2   7   6  113.32    6.77
  -2  -7   6  111.79    5.76
  -2   7   6  105.67    3.08
   2  -7  -6  107.64    6.82
   2  -7  -5  357.08    9.07
   2  -7  -5  361.08    5.32
  -2   7   5  372.98    9.18
  -2  -7   5  369.12    8.64
  -2  -7   5  358.61    8.15
   2   7  -5  378.51    9.34
  -2   7   4  435.98    8.92
  -2  -7   4  446.57    8.65
   2   7  -4  470.25    9.52
   2  -7  -4  457.15    9.62
  -2  -7   4  433.12    8.66
   2  -7  -4  453.79    6.07
   2  -7  -3   63.15    4.95
   2   7  -3   53.64    4.07
  -2  -7   3   53.55    4.26
  -2   7   3   68.53    4.28
   2   7  -3   64.57    4.39
   2  -7  -3   49.43    2.91
   2   7  -2 5517.87   26.40
   2   7  -2 5498.60   26.81
  -2   7   2 5504.58   29.40
   2  -7  -2 5568.67   22.29
  -2  -7   2 5586.14   25.32
   2   7  -1  269.52    6.59
   2   7  -1  280.19    6.29
  -2  -7   1  268.98    6.16
  -2   7   1  270.74    4.67
  -2   7   1  297.75    7.47
   2  -7  -1  260.12    5.64
  -2  -7   0 1817.21   14.07
   2   7   0 1795.74   15.45
  -2   7   0 1827.50   16.98
  -2   7   0 1762.14    7.98
   2  -7   0 1868.86   14.53
   2   7   0 1823.94   13.78
   2   7   1  831.97   11.11
  -2   7  -1  878.30   11.98
   2   7   1  867.57    9.37
   2  -7   1  859.94   10.87
  -2  -7  -1  854.89   10.23
   2   7   2  111.42    5.14
   2   7   2  121.05    4.03
   2  -7   2  113.60    5.39
  -2   7  -2  106.65    5.19
   2   7   2  101.73    4.61
  -2  -7  -2  104.72    4.86
  -2   7  -3 1008.22   13.09
   2  -7   3  942.44   12.95
   2   7   3  987.63    9.61
   2   7   3  968.76   12.94
   2   7   3  959.81   12.35
   2  -7   4  495.04   10.40
   2   7   4  482.56    9.95
   2   7   4  486.02    6.89
   2  -7   4  474.63    5.05
  -2   7  -4  473.33    9.52
   2   7   4  480.76    9.80
   2  -7   5   93.98    6.79
   2   7   5  103.96    5.87
   2  -7   5  104.49    3.64
   2   7   5  100.74    3.52
   2   7   5   95.57    6.34
  -2   7  -5   89.82    5.25
  -2  -7  -6 1953.34   12.36
   2   7   6 2010.42   20.35
  -2   7  -6 1945.44   18.97
   2  -7   6 1950.27   14.86
   2  -7   6 1973.47   21.18
   2   7   6 1959.41   21.82
   2   7   7  257.27    8.80
  -2   7  -7  252.93    7.91
   2  -7   7  255.99    6.72
  -2  -7  -7  248.33    4.79
   2   7   7  262.66   10.13
   2  -7   7  239.08    9.72
  -2   7  -8   52.86    5.29
   2  -7   8   45.19    7.34
   2   7   8   59.21    6.09
   2  -7   8   52.44    4.47
   2   7   8   52.53    6.90
   2   7   9  486.32   13.87
   2  -7   9  476.80   13.45
   2  -7   9  535.79   11.01
   2   7   9  513.60   12.20
  -2   7  -9  507.75   11.08
  -2   7 -10  264.68    8.69
   2   7  10  245.88    9.33
   2   7  10  297.73   12.11
   2  -7  10  275.80    9.17
   2  -7  10  276.28   11.65
   2  -7  11  144.16    7.94
   2  -7  11  146.80   10.30
   2   7  11  136.00    8.05
   2   7  11  124.19    9.75
   2  -7  12  451.29   14.97
   2   7  12  496.35   13.31
   2   7  12  476.35   16.08
   2  -7  12  517.52   13.61
   2  -7  13   12.51    7.99
   2   7  13    6.22    8.11
   2   7  14  326.13   15.56
   2  -7  14  342.29   13.83
   2  -7  15    6.76    7.50
   2   7  16   -6.68    9.84
  -2   8  16   11.97   10.13
  -2   8  15   93.53   11.44
  -2  -8  15  100.39   10.51
  -2  -8  14   30.46    8.33
   2   8 -13    3.58    7.12
  -2  -8  13   -4.59    8.37
  -2   8  13   -2.44    9.00
   2   8 -12  204.94   10.80
  -2   8  12  215.66   12.44
  -2  -8  12  228.36   11.81
  -2  -8  11  496.48   14.25
  -2  -8  11  456.55   12.45
  -2   8  11  515.70   15.57
   2  -8 -11  541.04   13.97
   2   8 -11  563.66   14.84
   2   8 -10   13.67    6.15
  -2   8  10   -3.10    6.96
  -2  -8  10   -4.99    5.71
  -2  -8  10   -1.16    5.54
   2  -8 -10   -2.07    5.83
   2  -8  -9 1097.64   17.85
   2   8  -9 1196.45   19.11
  -2  -8   9 1145.24   18.11
  -2   8   9 1192.95   19.98
  -2  -8   9 1112.44   16.92
   2  -8  -8   15.55    5.54
  -2   8   8   12.57    5.92
  -2  -8   8   22.98    5.51
  -2  -8   8   17.26    5.02
  -2  -8   7  530.96   11.46
  -2   8   7  507.66    6.52
   2   8  -7  550.92   12.38
   2  -8  -7  503.22   11.61
  -2   8   7  539.45   12.47
  -2  -8   7  532.76   11.11
  -2  -8   6  557.62   10.97
   2   8  -6  539.99   11.67
  -2   8   6  569.11   11.94
  -2  -8   6  551.16   10.92
  -2   8   6  550.59    6.83
   2  -8  -6  558.09   11.89
  -2  -8   5  164.58    6.90
   2   8  -5  165.67    7.16
  -2   8   5  176.85    7.01
  -2  -8   5  153.74    6.53
   2  -8  -5  168.76    4.51
   2  -8  -5  161.42    7.32
  -2  -8   4   92.30    5.32
  -2   8   4  103.49    5.33
   2  -8  -4  106.29    3.91
   2  -8  -4   90.98    6.11
  -2  -8   4  115.97    5.89
   2   8  -4  102.89    5.72
   2   8  -3 2136.70   18.24
   2  -8  -3 2220.19   14.82
  -2   8   3 2127.25   19.70
  -2   8   3 2095.34   17.01
  -2  -8   3 2235.85   17.55
   2   8  -3 2182.34   18.59
   2  -8  -3 2114.49   19.53
   2   8  -2  116.46    5.21
   2   8  -2  108.47    5.21
   2  -8  -2   97.23    4.16
  -2  -8   2  104.61    5.00
  -2   8   2  108.51    4.10
  -2   8   2  112.20    5.74
   2   8  -1 2875.88   20.56
   2   8  -1 2978.79   19.47
  -2  -8   1 2998.50   18.81
  -2   8   1 3018.12   22.60
   2  -8  -1 3032.03   18.78
  -2   8   1 2989.40   14.93
  -2   8   0 1990.05   18.59
  -2   8   0 1943.59    8.56
  -2  -8   0 1996.83   15.45
   2   8   0 1945.14   15.45
   2   8   0 1928.16   16.92
   2  -8   0 1991.75   16.25
   2   8   1   88.04    4.86
  -2   8  -1   81.50    5.06
  -2  -8  -1   70.15    4.42
   2  -8   1   84.74    4.85
   2   8   1   76.14    3.91
   2   8   2  813.98   10.94
  -2   8  -2  824.11   12.50
   2   8   2  827.28    9.97
   2   8   2  835.01   11.99
   2  -8   2  833.99   11.96
  -2  -8  -2  850.45   11.57
   2   8   3  473.89    7.51
  -2   8  -3  466.45    9.96
   2   8   3  455.13    9.46
   2   8   3  436.68    8.96
   2  -8   3  448.94    9.91
   2  -8   4  573.29   11.67
  -2   8  -4  565.84   10.91
   2   8   4  564.47   10.79
   2   8   4  554.12   10.88
   2  -8   4  534.72    4.61
   2   8   4  542.01    7.90
   2   8   5 2068.38   20.50
   2   8   5 2073.10   14.50
   2  -8   5 2022.88   21.30
   2  -8   5 2027.43   12.35
   2   8   5 2114.83   21.63
  -2   8  -5 2040.34   19.94
   2   8   6   32.43    4.99
   2   8   6   26.07    5.51
   2  -8   6   24.98    2.89
  -2  -8  -6   22.74    2.96
  -2   8  -6   17.45    4.74
  -2  -8  -7  813.41    8.95
   2   8   7  753.99   15.41
  -2   8  -7  807.57   13.72
   2   8   7  831.02   14.34
   2  -8   7  820.94   10.84
   2  -8   7  800.48   15.38
   2  -8   8   35.72    7.32
   2   8   8   28.22    6.99
   2   8   8   22.97    5.16
   2  -8   8   38.04    4.21
   2   8   9   35.93    5.90
   2  -8   9   34.41    7.54
  -2   8  -9   31.17    5.32
   2  -8   9   39.87    4.70
   2   8   9   33.95    7.50
   2   8  10  320.62   10.56
   2  -8  10  301.11    9.45
  -2   8 -10  277.39    9.55
   2   8  10  311.00   12.93
   2  -8  10  289.95   12.10
   2  -8  11  386.02   14.02
   2   8  11  408.32   14.93
   2   8  11  409.16   11.86
   2  -8  12   -0.94    8.28
   2   8  12   34.42    6.11
   2   8  13  324.45   14.79
   2  -8  13  282.15   13.25
   2  -8  14    0.26    7.91
   2   8  15  122.02   12.23
   2  -8  15  113.34   10.28
   2   8  16   72.59   11.89
  -2  -9  15  188.93   12.49
  -2   9  15  214.01   14.09
  -2  -9  14   20.07    8.29
   2   9 -13  287.03   12.95
  -2  -9  13  291.91   13.49
  -2  -9  12   -1.20    6.28
  -2   9  12  -10.99    8.43
   2   9 -12   -6.38    7.14
  -2  -9  12   -5.71    7.51
   2  -9 -11  307.44   11.55
   2   9 -11  315.71   12.39
  -2  -9  11  326.36   12.21
  -2   9  11  310.95   13.27
  -2  -9  11  304.05   11.10
  -2  -9  10   56.16    7.22
  -2   9  10   50.38    7.84
   2   9 -10   63.32    7.51
   2  -9 -10   70.45    7.51
  -2  -9  10   53.39    6.98
   2   9  -9   81.98    7.65
  -2   9   9   82.41    7.95
  -2  -9   9   96.35    7.69
   2  -9  -9   87.20    7.46
  -2  -9   9   80.86    7.16
   2   9  -8   16.95    6.12
  -2  -9   7 2033.51   21.10
   2   9  -7 2038.71   23.01
  -2   9   7 2096.32   23.72
  -2  -9   7 1980.17   21.25
   2  -9  -7 1955.91   21.62
   2  -9  -6  297.77    6.04
  -2  -9   6  284.40    8.89
  -2  -9   6  295.77    8.86
  -2   9   6  317.78    9.58
   2   9  -6  290.91    9.60
   2  -9  -6  277.14    9.46
   2  -9  -5 1789.93   13.88
   2  -9  -5 1777.11   19.61
  -2  -9   5 1741.05   18.62
  -2  -9   5 1806.72   17.93
  -2   9   5 1758.72   18.88
   2   9  -5 1809.33   19.69
   2  -9  -4   95.75    6.52
  -2   9   4   98.85    5.31
  -2  -9   4   95.56    6.08
   2   9  -4  104.05    6.25
  -2  -9   4   85.93    5.94
   2  -9  -4   95.75    4.36
  -2  -9   3 1208.08   14.92
  -2   9   3 1199.71   15.62
  -2   9   3 1164.26   13.06
   2   9  -3 1193.27   14.65
   2   9  -3 1205.12   14.78
  -2  -9   3 1246.42   13.91
   2  -9  -3 1195.09   12.10
   2   9  -2   87.45    5.46
  -2   9   2   98.19    5.94
   2   9  -2  102.34    5.42
  -2   9   2   98.37    4.08
  -2  -9   2   84.72    5.11
   2  -9  -2   88.39    4.59
  -2   9   1  673.09    7.38
   2   9  -1  679.11   11.07
  -2   9   1  681.50   11.88
  -2  -9   1  677.12    9.75
   2  -9  -1  686.04   10.08
   2   9  -1  677.67   10.22
   2   9   0   10.28    3.92
   2  -9   0    5.33    3.94
  -2  -9   0    2.79    3.25
  -2   9   0    2.80    4.33
   2   9   0    3.26    3.07
   2   9   1 4271.31   26.83
  -2  -9  -1 4445.70   24.72
   2  -9   1 4379.01   26.27
   2   9   1 4413.90   23.93
  -2   9  -1 4559.01   29.49
   2   9   2   -1.47    3.80
  -2  -9  -2    2.01    3.81
  -2   9  -2   -4.70    4.38
   2   9   2   -0.14    2.97
   2  -9   2    6.27    4.68
  -2   9  -3  904.58   13.99
   2   9   3  929.40   13.60
   2  -9   3  904.80   13.89
   2   9   3  888.50   12.85
   2   9   3  904.64   10.86
   2   9   4   87.55    4.25
  -2   9  -4   95.53    6.14
   2  -9   4  107.71    7.48
   2   9   4   96.62    6.09
   2   9   4   95.10    5.81
   2   9   5  135.20    7.18
   2  -9   5  136.66    7.87
   2   9   5  119.71    6.32
   2   9   5  122.30    4.57
   2  -9   5  114.12    3.14
  -2   9  -5  110.93    6.53
   2   9   6   30.16    3.11
   2   9   6   27.99    5.19
   2   9   6   29.77    5.87
   2  -9   6   37.12    3.00
  -2   9  -6   29.13    5.33
   2  -9   6   39.40    7.48
   2   9   7 1138.55   18.58
   2   9   7 1162.79   17.15
   2  -9   7 1192.39   12.52
   2  -9   7 1187.50   18.94
  -2   9  -7 1113.47   16.52
  -2  -9  -7 1164.63   11.64
   2  -9   8   13.48    3.34
  -2   9  -9 1233.74   18.60
   2   9   9 1270.71   18.64
   2   9   9 1240.28   21.80
   2  -9   9 1210.14   20.87
   2   9  10   31.98    8.30
   2   9  10   36.18    6.11
   2   9  11  292.58   13.60
   2  -9  11  281.96   13.11
   2   9  11  304.43   10.55
   2   9  12    8.14    8.81
   2  -9  12   16.89    8.52
   2  -9  13   -4.82    8.25
   2   9  13    1.61    8.81
   2   9  14    5.61    9.65
   2  -9  14    7.51    8.32
   2   9  15  248.07   15.00
   2  -9  15  218.27   12.67
  -2  10  15   94.86   12.39
  -2  10  14   74.17   11.26
   2  10 -14   90.16    9.62
  -2 -10  14   77.45    9.58
   2  10 -13    7.77    7.50
  -2  10  13   13.52    9.09
  -2 -10  13    8.17    7.37
  -2 -10  12  112.17    8.95
  -2  10  12  119.70   10.82
  -2 -10  12  140.69   10.23
  -2  10  11  298.39   13.14
  -2 -10  11  293.68   11.61
  -2 -10  11  268.15   11.47
   2  10 -11  300.65   12.83
  -2  10  10   -5.29    7.42
  -2 -10  10   12.34    6.34
   2 -10 -10    5.82    6.31
   2  10 -10    1.05    6.85
  -2 -10  10    7.99    6.75
  -2 -10   9  728.38   15.33
  -2  10   9  771.15   17.06
  -2 -10   9  730.56   15.06
   2  10  -9  699.01   15.89
   2 -10  -9  715.25   15.33
  -2  10   8  132.32    8.43
  -2 -10   8  111.01    8.03
  -2 -10   8  122.84    7.30
   2 -10  -8  114.66    7.68
   2  10  -8  124.54    8.50
   2  10  -7   87.66    7.81
  -2  10   7   77.09    6.63
  -2 -10   7   86.19    7.02
   2 -10  -7   67.52    6.72
  -2 -10   7   72.83    6.28
   2 -10  -6  230.58    5.93
   2 -10  -6  232.74    9.07
  -2 -10   6  253.31    8.47
  -2  10   6  253.19    8.92
   2  10  -6  244.01    9.32
  -2 -10   6  244.16    9.01
   2 -10  -5  174.28    5.58
  -2 -10   5  165.20    7.89
  -2 -10   5  179.38    7.32
  -2  10   5  175.59    7.16
   2 -10  -5  154.49    7.73
   2  10  -5  175.65    7.99
  -2 -10   4  758.85   13.14
  -2  10   4  754.56   12.04
  -2 -10   4  763.01   12.23
   2 -10  -4  739.42   10.31
   2  10  -4  780.94   13.37
   2 -10  -4  754.79   13.75
  -2 -10   3 2641.48   22.81
  -2 -10   3 2691.79   20.62
  -2  10   3 2660.11   19.95
   2  10  -3 2640.33   22.37
   2  10  -3 2616.80   22.48
   2 -10  -3 2691.65   19.20
  -2  10   3 2619.37   23.86
  -2 -10   2  459.09    8.91
   2  10  -2  460.09   10.09
  -2  10   2  485.68   10.92
  -2  10   2  456.41    7.58
   2  10  -2  463.41    9.67
   2 -10  -2  455.29    8.79
  -2  10   1 1560.26   11.20
   2  10  -1 1547.73   15.92
  -2 -10   1 1523.46   14.94
  -2  10   1 1513.31   17.99
   2  10  -1 1554.01   17.17
   2 -10  -1 1555.26   15.72
  -2 -10   0   23.34    3.91
   2  10   0   19.18    4.33
   2 -10   0   22.77    1.85
   2 -10   0   26.03    4.69
  -2  10   0   17.83    5.03
   2  10   1 1279.92   15.72
  -2  10  -1 1337.20   17.30
  -2 -10  -1 1281.53   14.20
   2  10   1 1260.85   13.97
   2 -10   1 1284.26   15.38
   2  10   2 2245.20   20.80
  -2 -10  -2 2169.98   19.40
   2 -10   2 2264.36   20.96
   2  10   2 2235.14   17.84
  -2  10  -2 2285.67   22.27
   2  10   3 1192.85   15.30
   2  10   3 1195.58   15.79
   2  10   3 1181.66   13.17
  -2  10  -3 1184.41   16.66
   2 -10   3 1109.68   15.92
   2 -10   4   39.64    6.66
   2  10   4   47.93    4.15
  -2  10  -4   44.20    5.79
   2  10   4   47.80    5.44
   2  10   4   44.88    5.33
   2  10   5  398.53   10.25
   2  10   5  401.42    7.97
  -2  10  -5  377.42   10.35
   2 -10   5  390.49   11.77
   2  10   5  388.07   10.64
   2  10   6   12.34    4.96
   2  10   6   20.99    3.34
   2 -10   7 1157.49   19.35
  -2 -10  -7 1182.39   12.71
   2  10   7 1170.29   17.44
  -2  10  -7 1104.76   17.36
   2  10   7 1151.30   19.31
   2  10   8  425.72   11.60
  -2  10  -8  429.64   11.82
   2 -10   8  416.32   13.33
   2  10   8  409.91   12.95
   2  10   9   35.98    6.13
   2  10   9   44.11    7.62
  -2  10  -9   40.49    6.02
   2  10  10  214.41   11.90
   2  10  10  215.46    9.56
   2 -10  10  215.24   11.65
  -2  10 -10  194.98    9.13
   2  10  11  337.35   14.30
   2  10  11  364.34   11.71
   2 -10  11  351.43   14.18
  -2  10 -11  341.76   11.70
   2 -10  12   55.71    9.84
   2  10  12   51.82    9.66
   2 -10  13  262.93   14.21
   2  10  13  277.85   14.67
   2 -10  14   17.74    9.18
   2  10  14   16.40    9.63
   2 -10  15   60.50    9.79
  -2  11  15   70.73   11.55
   2  11 -14   46.84    9.29
  -2  11  14   36.44   10.37
   2  11 -13   23.55    8.11
  -2  11  12   91.14   10.28
   2  11 -12  116.40   10.35
  -2 -11  12  118.57    9.50
  -2 -11  12  101.71    9.27
  -2  11  11  164.78   11.36
   2  11 -11  152.69   10.93
  -2 -11  11  163.98    9.96
  -2 -11  11  155.44   10.17
  -2 -11  10  615.71   15.65
  -2  11  10  615.36   16.37
   2  11 -10  585.55   16.24
  -2 -11  10  591.26   14.82
   2 -11 -10  587.63   14.86
   2  11  -9   72.13    7.96
   2 -11  -9   54.57    6.80
  -2  11   9   73.95    8.16
  -2 -11   9   83.92    7.27
  -2 -11   9   74.05    8.14
   2  11  -8  856.31   17.22
   2 -11  -8  819.19   16.21
  -2  11   8  846.23   16.92
  -2 -11   8  849.16   15.28
  -2 -11   8  818.64   16.26
   2 -11  -7  168.48    8.71
  -2 -11   7  172.78    8.71
  -2  11   7  163.55    8.47
   2  11  -7  167.21    9.14
  -2 -11   7  176.06    7.82
   2  11  -6    3.55    5.65
  -2 -11   6    4.61    5.55
  -2  11   6    7.80    4.77
   2 -11  -5  551.98    9.43
  -2  11   5  538.36   11.33
   2  11  -5  556.67   12.76
  -2 -11   5  524.83   12.12
  -2 -11   5  563.25   11.32
   2 -11  -5  505.47   12.18
  -2 -11   4  847.64   14.52
  -2  11   4  765.99   13.97
   2 -11  -4  799.52   14.58
  -2  11   4  815.88   12.81
   2 -11  -4  817.51   11.56
  -2 -11   4  817.59   13.01
   2  11  -4  785.35   14.04
   2  11  -3  218.62    8.17
  -2  11   3  190.04    6.23
  -2 -11   3  194.86    7.29
  -2  11   3  184.14    8.08
   2  11  -3  201.44    8.04
  -2 -11   3  193.24    8.29
   2 -11  -3  194.74    6.68
  -2 -11   2 2432.80   19.69
   2  11  -2 2471.95   22.90
  -2  11   2 2418.73   17.12
   2 -11  -2 2425.59   20.09
  -2  11   2 2477.63   23.86
   2  11  -2 2457.57   21.74
   2 -11  -1    4.99    4.06
   2  11  -1    9.25    4.59
  -2 -11   1   10.53    4.08
   2 -11   0 1334.87    8.41
   2  11   0 1234.79   16.24
  -2 -11   0 1267.84   14.27
   2  11   0 1288.08   15.32
  -2  11   0 1287.72   17.63
   2 -11   0 1308.72   15.94
   2  11   1  627.71   12.06
  -2 -11  -1  594.88   10.45
   2  11   1  609.83   10.72
   2 -11   1  652.39   12.20
  -2  11  -1  660.60   13.08
   2 -11   2   11.21    5.65
   2  11   2    7.91    4.70
   2  11   2    9.34    3.76
  -2 -11  -2    7.13    4.47
  -2  11  -3   80.19    6.54
   2 -11   3   66.23    7.09
   2  11   3   81.12    5.60
   2  11   3   73.44    4.90
   2  11   3   61.73    5.97
  -2 -11  -3   74.26    5.87
  -2  11  -4  597.27   12.93
   2  11   4  562.74    9.85
   2  11   4  582.12   12.19
   2 -11   4  586.44   13.28
   2  11   4  572.83   12.10
   2  11   5   31.44    5.49
   2  11   5   18.91    5.59
   2  11   5   19.90    3.64
  -2  11  -5   28.52    5.79
   2 -11   5   16.20    6.66
   2  11   6 1483.80   19.49
   2  11   6 1468.23   14.85
   2  11   6 1455.12   20.62
  -2  11  -6 1406.75   19.79
   2 -11   6 1472.16   21.25
   2  11   7   68.77    7.78
   2  11   7   69.83    6.72
  -2  11  -7   45.67    6.32
   2 -11   7   45.92    7.96
   2  11   8   92.94    8.62
  -2  11  -8   85.42    7.42
   2 -11   8   80.53    8.83
   2  11   8   86.51    7.17
   2 -11   9  371.75   13.52
   2  11   9  340.77   13.06
  -2  11  -9  362.38   11.92
   2  11  10   53.49    6.58
  -2  11 -10   59.79    7.39
   2  11  10   67.80    9.36
   2  11  11    8.44    5.77
   2  11  11    5.56    8.59
   2 -11  11   12.48    8.60
   2 -11  12  379.41   15.57
   2  11  12  392.99   16.15
   2  11  13  -11.35    9.61
   2 -11  13   -7.54    9.63
   2  11  14  168.43   13.21
   2 -11  14  164.64   12.69
   2 -11  15  102.85   11.19
   2  11  15   90.14   12.00
  -2  12  15   -8.07   10.23
  -2  12  14  213.63   14.29
   2  12 -14  207.85   13.42
   2  12 -13   -6.51    8.20
  -2  12  13  -11.46    9.80
  -2 -12  12  301.85   13.32
  -2  12  12  296.03   14.47
   2  12 -12  285.14   13.88
  -2 -12  11   48.46    7.61
  -2  12  11   70.94    9.41
  -2 -12  11   62.13    8.92
   2  12 -11   75.92    9.78
  -2 -12  10   16.77    7.84
   2  12 -10   14.53    8.03
  -2 -12  10   11.72    6.27
  -2  12   9    3.97    7.20
   2 -12  -9    3.11    6.53
   2  12  -9    2.07    7.12
  -2 -12   9   -1.79    6.53
  -2 -12   8  425.27   13.20
  -2  12   8  425.38   13.36
   2  12  -8  442.98   13.72
  -2 -12   8  420.88   11.59
   2 -12  -8  425.49   12.64
   2 -12  -7   60.85    7.07
  -2 -12   7   64.09    6.37
   2  12  -7   70.08    7.72
  -2 -12   7   56.37    7.29
  -2  12   7   77.47    7.32
   2 -12  -6 1650.16   16.46
   2  12  -6 1777.52   22.90
  -2 -12   6 1816.45   20.07
  -2  12   6 1730.45   21.32
   2 -12  -6 1698.31   21.53
  -2 -12   6 1754.49   22.18
  -2  12   5    4.36    4.50
   2 -12  -5    3.93    3.85
   2  12  -5    1.48    5.87
  -2 -12   5    4.49    5.77
   2 -12  -5    2.18    5.60
  -2 -12   5   -3.26    4.89
  -2 -12   4 1298.15   16.39
  -2  12   4 1242.66   18.03
  -2  12   4 1280.30   15.89
   2 -12  -4 1240.66   18.15
   2  12  -4 1201.90   18.05
   2 -12  -4 1232.88   14.88
  -2 -12   4 1251.70   18.37
  -2  12   3   15.98    3.69
  -2  12   3   14.67    5.39
  -2 -12   3   17.92    5.77
   2 -12  -2    6.32    4.68
   2  12  -2   16.41    5.52
  -2 -12   2   10.77    4.53
  -2  12   2   10.44    2.86
  -2  12   2    8.11    5.64
   2  12  -1   62.32    6.30
  -2  12   1   68.43    3.24
  -2 -12   1   74.61    5.41
  -2  12   1   72.80    6.45
   2  12  -1   75.99    5.84
   2 -12  -1   76.05    5.94
   2 -12   0 1536.76    9.45
   2  12   0 1443.34   18.37
   2 -12   0 1512.99   17.97
  -2 -12   0 1433.67   15.78
  -2  12   0 1514.40   19.82
   2  12   0 1471.50   17.30
   2  12   1  100.49    6.71
  -2  12  -1  102.25    7.36
   2  12   1  107.15    5.87
  -2 -12  -1   99.95    5.88
   2 -12   1  115.92    7.26
   2  12   2 2246.87   22.90
  -2 -12  -2 2179.40   20.62
   2 -12   2 2208.98   22.79
  -2  12  -2 2243.59   24.02
   2  12   2 2178.21   20.02
   2  12   3    0.31    3.82
   2  12   3    8.17    5.10
  -2 -12  -3    9.04    4.94
  -2  12  -3   -4.86    5.90
   2 -12   3    4.13    6.33
   2  12   4  481.00   11.43
   2  12   4  470.95   11.53
   2  12   4  477.28    9.93
  -2  12  -4  493.87   12.62
   2 -12   4  511.72   13.10
   2  12   5   20.20    5.22
   2  12   6  199.87    9.00
   2  12   6  206.87    9.91
   2  12   6  198.37    6.62
  -2  12  -6  211.65    9.50
   2 -12   6  214.69   10.90
   2  12   7   15.28    5.78
   2  12   7   14.72    6.89
   2 -12   7   19.23    7.77
  -2  12  -7   11.30    5.81
   2  12   8  609.28   16.02
   2  12   8  646.20   14.36
   2 -12   8  662.92   17.14
  -2  12  -8  622.78   15.35
   2  12   9   61.54    7.06
   2  12   9   53.87    8.44
   2 -12   9   61.33    9.54
  -2  12  -9   50.25    7.26
  -2  12 -10  795.30   17.86
   2  12  10  775.48   16.06
   2 -12  10  735.84   19.51
   2  12  10  747.07   19.31
  -2  12 -11   20.02    6.96
   2 -12  11   13.86    9.45
   2  12  12   51.57   10.20
   2 -12  13   12.04    9.56
   2  12  13   -5.25    9.56
   2  12  14   70.50   11.65
   2 -12  15   14.69    9.57
   2  12  15   -0.47   10.53
  -2  13  13  123.10   12.05
   2  13 -13   92.65   11.02
  -2  13  12   44.07    9.87
  -2 -13  12   61.76    9.66
   2  13 -11   56.59    9.61
  -2  13  11   53.18    9.69
  -2 -13  11   53.07    9.27
   2 -13 -10  407.87   13.40
  -2  13  10  455.72   15.55
  -2 -13  10  444.35   15.12
  -2 -13  10  405.12   12.80
   2  13 -10  383.81   14.83
  -2  13   9    5.64    7.42
  -2 -13   9   11.67    5.72
   2  13  -9    8.28    7.85
  -2 -13   9    0.44    7.30
  -2  13   8  368.14   12.67
  -2 -13   8  400.35   11.44
   2  13  -8  400.70   13.66
  -2 -13   8  401.47   13.20
  -2 -13   7  183.14   10.25
  -2  13   7  187.07    9.19
   2  13  -7  206.85   10.39
   2 -13  -7  170.04    9.26
  -2 -13   7  198.97    8.59
  -2 -13   6    1.14    6.80
  -2  13   6    9.50    4.93
   2  13  -6   13.96    6.36
   2 -13  -6   15.16    6.02
  -2 -13   6    9.65    4.98
  -2  13   5  177.94    7.56
  -2 -13   5  177.88    7.84
   2 -13  -5  169.97    8.97
   2 -13  -5  159.34    6.66
   2  13  -5  168.51    9.23
  -2 -13   5  179.16    9.43
  -2 -13   4  668.71   12.53
  -2  13   4  653.42   11.93
   2  13  -4  618.48   14.03
  -2  13   4  629.44   13.77
  -2 -13   4  637.15   14.23
   2 -13  -4  637.51   11.82
  -2 -13   3   34.45    6.46
  -2  13   3   30.04    4.00
  -2  13   3   39.41    6.54
   2  13  -3   38.12    6.49
  -2 -13   3   41.11    5.39
   2 -13  -3   35.76    5.25
   2  13  -2 1697.03   21.07
  -2  13   2 1710.48   21.56
  -2 -13   2 1701.31   17.89
   2  13  -2 1659.16   20.23
  -2  13   2 1672.92   14.54
  -2 -13   2 1660.54   21.04
   2 -13  -2 1700.78   19.06
   2  13  -1  378.61   10.38
  -2 -13   1  343.44    8.88
  -2  13   1  355.75   11.17
   2 -13  -1  341.12    6.23
   2  13  -1  355.77   10.69
   2 -13  -1  333.69    9.81
   2  13   0  820.17   14.91
  -2 -13   0  863.69   13.04
   2  13   0  891.42   14.23
   2 -13   0  838.47   14.62
  -2  13   0  911.82   16.50
  -2 -13  -1  960.39   13.84
   2  13   1 1018.67   16.54
  -2  13  -1 1016.46   17.41
   2  13   1  989.18   14.76
   2 -13   1 1015.30   16.36
   2  13   2    6.47    4.40
  -2 -13  -2    0.62    4.78
   2  13   2    7.44    5.35
  -2  13  -2    3.53    5.87
   2 -13   2    0.50    6.30
   2  13   3  647.23   11.88
   2  13   3  651.84   13.81
  -2 -13  -3  666.01   13.09
  -2  13  -3  653.68   14.67
   2 -13   3  671.07   14.63
  -2 -13  -4  629.90   13.64
   2  13   4  642.63   13.67
   2 -13   4  632.19   14.74
  -2  13  -4  652.33   14.81
   2  13   4  620.50   11.61
   2  13   4  616.44   13.05
   2  13   5  123.84    8.15
   2  13   5  118.35    5.98
  -2  13  -5  119.95    8.41
   2  13   5  132.45    7.87
   2 -13   5  135.55    9.66
   2  13   6  620.90   11.34
   2 -13   6  663.12   16.56
   2  13   6  657.31   14.11
   2  13   6  657.98   15.07
   2  13   7  108.79    8.59
   2  13   7  103.67    7.51
  -2  13  -7   84.44    8.25
   2 -13   7   87.33    9.87
   2  13   8   26.94    7.50
  -2  13  -8   43.06    7.43
   2 -13   8   31.72    8.77
   2  13   8   25.95    6.38
   2  13   9   88.63    9.77
   2  13   9  115.40    8.10
  -2  13  -9   84.50    8.68
   2 -13   9  113.23   11.33
   2 -13  10   97.58   11.13
   2  13  10   80.28    7.59
  -2  13 -10   99.24    9.46
   2  13  10   86.70   10.09
   2  13  11   84.13   10.73
   2 -13  11   90.63   11.40
  -2  13 -11  110.57    9.59
   2  13  12  302.68   14.79
   2 -13  12  308.74   15.57
   2  13  13   -2.05    9.80
   2 -13  13   -4.18   10.14
   2  13  14  172.65   13.59
   2 -13  14  125.93   12.82
   2 -13  15   57.49   10.71
   2  14 -14   93.86   11.47
  -2  14  14   84.74   11.49
  -2  14  13   10.87    9.17
   2  14 -13    1.75    9.29
   2  14 -12   42.21    9.75
  -2  14  12   30.19    8.66
  -2 -14  11  292.84   14.00
  -2  14  11  282.49   13.61
   2  14 -11  277.93   14.45
   2  14 -10   83.28   10.39
  -2 -14  10   78.29   10.29
  -2  14  10   66.39    9.51
   2 -14 -10   73.73    8.80
  -2 -14   9  406.78   14.68
  -2  14   9  381.34   13.38
   2  14  -9  401.87   15.32
   2 -14  -9  400.75   13.35
  -2 -14   8   66.82    6.81
   2 -14  -8   51.13    7.63
  -2  14   8   69.49    7.93
   2  14  -8   52.99    8.81
  -2 -14   8   65.30    8.65
  -2 -14   7  177.89    8.50
  -2  14   7  168.02    9.13
   2  14  -7  164.51   10.49
   2 -14  -7  173.18    9.35
  -2 -14   7  181.44   10.69
  -2 -14   6   75.60    6.40
  -2  14   6   78.04    6.75
   2 -14  -6   67.99    7.48
   2  14  -6   71.87    8.40
  -2 -14   6   70.83    8.35
   2 -14  -6   52.50    5.18
  -2  14   5  136.61    7.24
  -2 -14   5  132.78    7.16
   2  14  -5  151.64    9.38
   2 -14  -5  128.78    6.78
   2 -14  -5  128.99    8.28
  -2 -14   5  137.72    9.32
  -2 -14   4   94.55    6.82
   2  14  -4   93.20    8.18
  -2  14   4   85.98    5.58
  -2  14   4   84.52    7.59
   2 -14  -4   91.09    6.24
  -2 -14   4   87.58    8.31
  -2 -14   3 1710.20   18.93
  -2  14   3 1706.88   16.89
  -2 -14   3 1648.67   22.34
  -2  14   3 1670.38   22.34
   2  14  -3 1680.69   22.00
   2 -14  -3 1665.57   19.54
  -2 -14   2  117.57    8.32
   2  14  -2  132.96    8.34
  -2  14   2  131.96    4.95
  -2  14   2  123.50    8.47
   2  14  -2  127.61    8.08
   2 -14  -2  119.48    7.37
  -2 -14   2  118.78    6.65
   2  14  -1  982.87   17.27
  -2 -14   1  995.26   14.25
  -2  14   1 1004.19   17.66
   2 -14  -1  976.27   15.93
   2  14  -1 1025.54   16.46
  -2  14   0  212.26    9.89
  -2 -14   0  222.74    7.87
   2 -14   0  239.41    9.33
   2  14   0  238.44    8.95
   2  14   0  215.32    9.19
   2  14   1  418.92   10.69
   2 -14   1  416.33   11.96
   2  14   1  411.85   11.99
  -2 -14  -1  388.13    9.82
  -2  14  -1  417.92   12.32
   2  14   2  717.55   14.88
  -2  14  -2  716.09   15.67
   2  14   2  731.63   13.41
  -2 -14  -2  718.31   13.07
   2 -14   2  764.19   15.57
   2  14   3  345.21    9.50
  -2  14  -3  331.82   11.68
   2 -14   3  356.52   12.00
  -2 -14  -3  343.91   10.17
   2  14   3  359.27   11.42
   2  14   4  157.60    8.79
   2 -14   4  176.20   10.18
   2  14   4  159.87    7.24
  -2  14  -4  186.75    9.86
  -2 -14  -4  166.09    8.66
   2  14   5  899.81   13.97
   2  14   5  900.02   16.75
  -2  14  -5  902.58   18.22
   2  14   5  966.92   17.48
   2  14   6   12.03    6.15
   2  14   6   14.66    4.12
   2  14   7  249.83   11.33
   2  14   7  282.26   10.65
  -2  14  -7  241.83   11.38
   2 -14   7  250.26   12.44
   2  14   8  307.58   12.74
   2  14   8  270.58   10.69
   2 -14   8  313.49   13.98
  -2  14  -8  292.05   12.46
   2 -14   9    2.08    8.93
   2  14   9   -2.49    5.84
   2  14   9    1.95    7.52
  -2  14  -9   -5.58    7.09
  -2  14 -10    7.68    7.26
   2  14  10   12.42    6.11
   2 -14  10   17.14    9.96
   2  14  11  230.12   13.94
   2 -14  11  235.40   14.52
   2  14  12   30.81    9.85
   2 -14  12    1.27   10.21
   2  14  13  265.26   15.19
   2 -14  13  244.33   15.36
   2  14  14   55.47   11.65
   2  15 -14   -0.05    9.22
  -2  15  14   -3.57    9.54
  -2  15  13  320.60   15.61
   2  15 -13  336.85   16.38
  -2  15  12    9.79    8.51
  -2 -15  12  -10.76    9.49
   2  15 -12   -6.13    9.85
  -2  15  11  106.92   10.59
   2  15 -11  140.18   12.23
   2  15 -10   14.03    9.13
  -2 -15  10   14.20    8.78
   2  15  -9   16.80    8.39
  -2 -15   9   32.79    8.73
  -2  15   8   16.11    6.63
  -2 -15   8   29.23    8.11
  -2 -15   7  753.54   15.06
  -2  15   7  751.15   16.47
   2 -15  -7  747.31   16.92
   2  15  -7  772.84   18.68
  -2 -15   7  761.01   18.09
   2 -15  -6  152.75    9.43
  -2  15   6  136.60    8.28
   2  15  -6  146.05   10.14
  -2 -15   6  143.34    7.84
  -2 -15   6  142.31   10.18
   2 -15  -5 1510.90   22.27
   2 -15  -5 1479.36   18.91
  -2 -15   5 1546.74   19.48
  -2  15   5 1550.08   19.59
  -2 -15   5 1524.67   23.64
   2 -15  -4   58.95    6.38
  -2  15   4   56.94    5.09
  -2 -15   4   39.81    5.95
  -2  15   4   52.43    7.31
   2  15  -4   68.91    8.06
  -2 -15   4   48.91    8.00
  -2  15   3  188.72    6.43
  -2 -15   3  198.67   10.32
  -2  15   3  220.10   10.06
  -2 -15   3  196.47    8.11
   2  15  -3  187.79    9.89
   2 -15  -3  196.19    8.67
  -2 -15   2  132.05    9.15
  -2 -15   2  131.63    7.03
  -2  15   2  122.18    8.50
   2  15  -2  116.09    8.21
   2 -15  -2  112.57    7.53
  -2  15   1  176.66    9.58
   2  15  -1  195.73    9.12
  -2 -15   1  181.74    7.63
   2  15  -1  203.46    9.74
  -2 -15   1  199.41   10.02
   2 -15  -1  176.64    8.58
   2  15   0    5.03    6.22
  -2  15   0    6.00    6.71
  -2 -15   0   -1.58    4.60
   2 -15   0    0.10    5.81
   2  15   0    4.72    5.28
   2 -15   1  776.43   15.77
   2  15   1  773.10   15.92
   2  15   1  805.45   14.65
  -2  15  -1  814.36   17.03
  -2 -15  -1  740.28   13.26
   2  15   2    7.03    6.37
  -2  15  -2   -5.23    6.66
   2  15   2    2.59    4.98
  -2 -15  -2    5.37    5.13
   2 -15   2    2.13    6.99
   2  15   3 1101.96   18.95
   2  15   3 1135.70   16.93
  -2  15  -3 1119.20   19.97
  -2 -15  -3 1095.29   17.21
   2 -15   3 1182.60   20.29
  -2 -15  -4    8.33    5.55
   2  15   4    3.34    6.41
   2  15   4    5.05    4.71
   2 -15   4    4.23    7.46
   2  15   5    3.77    4.60
   2  15   5    8.79    6.09
  -2 -15  -5    7.70    6.65
   2  15   5    5.95    6.16
  -2  15  -5   -1.32    6.61
   2 -15   5    4.55    7.78
   2  15   6   52.78    8.02
   2  15   6   46.51    5.28
   2  15   6   52.84    7.42
   2 -15   6   37.53    8.70
  -2  15  -6   45.19    7.95
   2  15   7  340.10   13.02
   2 -15   7  361.46   14.75
   2  15   7  345.71   11.87
  -2  15  -7  322.72   13.00
   2  15   8   -3.77    7.40
   2  15   8    1.57    6.05
  -2  15  -8   -1.27    7.02
   2 -15   8   10.16    9.32
   2  15   9  522.40   14.33
  -2  15  -9  541.82   16.94
   2 -15   9  559.76   18.59
   2 -15  10   16.74    9.89
   2  15  10   -0.03    5.91
   2  15  10   11.28    8.95
  -2  15 -10    8.14    7.77
   2  15  11  228.86   13.90
   2 -15  11  204.28   14.37
  -2  15 -11  222.46   12.46
   2  15  12   23.70    9.67
   2  15  13   -6.75    9.80
   2 -15  13    7.93   10.59
   2 -15  14    6.05   10.38
   2  16 -13   -2.80    9.21
  -2  16  13    1.07    9.11
  -2  16  12  114.04   11.53
  -2 -16  12   93.97   10.94
   2  16 -12  118.18   12.53
  -2  16  11   88.58   10.33
  -2 -16  11   85.54   11.27
   2  16 -11  105.18   11.54
   2  16 -10    4.14    9.40
  -2  16  10    3.45    7.43
  -2 -16  10    4.01    9.46
   2 -16  -9  236.05   11.65
  -2  16   9  263.72   12.54
   2  16  -9  244.35   13.63
  -2 -16   9  268.28   13.56
   2 -16  -8   55.95    8.15
   2  16  -8   58.31    9.86
  -2 -16   8   63.51   10.11
  -2  16   8   66.34    7.97
  -2  16   7  223.55   10.11
   2 -16  -7  202.70   10.63
   2  16  -7  222.30   12.50
  -2 -16   7  227.49   12.30
  -2  16   6  536.73   13.37
  -2 -16   6  536.41   16.34
   2 -16  -6  534.98   15.11
   2  16  -6  538.36   16.61
  -2  16   5  226.11    8.74
   2 -16  -5  211.77   10.26
  -2  16   5  210.07   10.38
  -2 -16   5  220.63    8.88
   2  16  -5  210.88   11.28
  -2 -16   5  226.93   11.94
   2 -16  -5  189.41    8.69
  -2  16   4  154.51    6.91
   2 -16  -4  162.63    8.46
   2  16  -4  166.21   10.13
  -2 -16   4  160.84    8.02
  -2 -16   4  141.95   10.08
  -2  16   4  165.30   10.19
   2  16  -3  512.31   14.44
  -2 -16   3  496.15   11.67
   2 -16  -3  502.19   12.99
  -2  16   3  511.38   14.16
  -2 -16   3  517.21   14.98
  -2 -16   2   37.21    7.99
   2  16  -2   36.83    6.92
   2 -16  -2   36.93    6.60
  -2  16   2   34.07    7.60
  -2 -16   1 1076.34   19.71
  -2 -16   1 1110.80   16.13
  -2  16   1 1154.36   20.08
   2  16  -1 1113.39   18.42
   2 -16  -1 1158.03   18.98
   2  16  -1 1088.61   19.69
  -2 -16   0  190.54    8.00
  -2  16   0  166.33    9.81
   2  16   0  210.28   10.51
   2  16   0  190.07    9.34
   2 -16   0  186.68    9.51
   2  16   1   -0.30    5.67
   2 -16   1   10.08    6.79
   2  16   1    1.79    6.78
  -2 -16  -1    3.55    5.02
   2 -16   2  199.82   10.52
  -2 -16  -2  185.53    8.25
  -2  16  -2  211.19   10.69
   2  16   2  194.60    9.86
   2  16   2  209.88    9.05
   2  16   3   36.03    6.02
  -2  16  -3   46.92    8.29
   2  16   3   42.94    7.55
   2  16   4  160.33    9.46
  -2  16  -4  177.56   10.61
  -2 -16  -4  179.02    9.14
   2 -16   4  186.52   10.95
   2  16   4  186.31    8.39
   2 -16   5 1150.95   22.08
   2  16   5 1162.17   17.46
   2  16   5 1250.26   21.00
  -2 -16  -5 1219.95   20.30
  -2  16  -5 1196.04   22.51
   2  16   6   38.83    5.59
  -2 -16  -6   41.07    7.93
  -2  16  -6   33.32    8.20
   2  16   7  119.09    9.62
   2  16   7  118.44    8.94
   2 -16   7   96.89   11.10
   2  16   8   72.79    8.08
   2 -16   8   65.50   11.08
  -2  16  -8   54.55    9.26
   2  16   9   14.04    6.39
   2 -16   9   20.02   10.34
  -2  16  -9   -5.76    8.36
   2  16  10  164.87   12.25
  -2  16 -10  180.26   12.11
   2 -16  11  146.56   14.04
  -2  16 -11  128.26   11.31
   2  16  11  157.40   12.47
   2  16  12    4.98    9.37
   2 -16  13  149.58   14.49
   2  16  13  197.43   14.13
  -2  17  13  109.82   11.10
   2  17 -13  105.36   12.81
  -2 -17  13  118.11   12.90
  -2  17  12   35.86    9.21
   2  17 -11    7.89   10.08
  -2  17  11    2.80    8.01
  -2 -17  11    4.29    9.88
  -2  17  10  248.07   12.73
   2  17 -10  259.98   15.36
  -2 -17  10  258.94   14.92
   2  17  -9   -2.70    9.38
  -2  17   9    4.98    7.09
   2 -17  -9    4.27    7.24
  -2 -17   9    0.70    9.80
   2 -17  -8  146.82   10.25
  -2  17   8  144.72    9.88
   2  17  -8  139.89   11.94
  -2 -17   8  137.71   11.87
  -2  17   7   88.86    7.89
  -2 -17   7  100.18   10.51
   2  17  -7   84.26   10.26
   2 -17  -7   96.98    9.17
   2 -17  -6    7.19    6.65
  -2 -17   6    7.02    8.51
  -2  17   6    3.28    5.56
   2  17  -6    9.65    8.30
   2 -17  -5  195.48   10.61
   2  17  -5  179.40   11.23
  -2  17   5  156.70   10.09
  -2 -17   5  160.39   11.42
   2 -17  -5  182.49    8.98
  -2 -17   4  546.62   16.38
   2  17  -4  610.97   16.43
   2 -17  -4  584.49   14.09
  -2  17   4  583.61   15.72
   2  17  -3   50.66    8.10
   2 -17  -3   44.52    7.12
  -2 -17   3   42.95    6.21
  -2 -17   3   47.03    8.84
  -2  17   3   63.01    8.32
   2 -17  -2  875.20   17.38
   2  17  -2  916.39   18.44
  -2 -17   2  826.34   18.61
  -2 -17   2  859.00   14.96
  -2  17   2  933.56   18.91
  -2  17   1   39.99    7.78
  -2 -17   1   42.95    6.20
  -2 -17   1   45.56    8.41
   2 -17  -1   49.45    7.61
  -2 -17   0  382.64   13.33
  -2 -17   0  368.28   10.37
  -2  17   0  394.11   13.54
   2  17   0  383.93   12.23
   2 -17   0  397.33   13.19
   2  17   0  401.65   13.50
   2  17   1   41.71    6.76
   2  17   1   48.74    7.96
  -2 -17  -1   42.91    6.18
   2 -17   1   42.51    7.89
  -2  17  -1   43.23    8.16
  -2  17  -2    0.82    7.05
   2  17   2   -1.77    7.36
   2  17   2    3.17    5.88
   2 -17   2   -1.95    7.55
   2  17   3  291.55   11.83
   2  17   3  260.52   10.06
  -2 -17  -3  271.37   10.23
  -2  17  -3  259.54   12.32
   2 -17   3  283.01   12.66
   2  17   4  753.65   17.64
   2 -17   4  775.55   19.05
   2  17   4  741.61   14.99
  -2  17  -4  752.30   18.45
  -2 -17  -4  761.74   16.23
   2  17   5   31.78    7.29
  -2  17  -5   18.86    7.95
   2  17   5   12.45    5.26
   2 -17   5   50.95    9.72
  -2 -17  -5   38.77    7.31
  -2  17  -6  406.78   15.11
   2 -17   6  408.01   15.83
  -2 -17  -6  452.00   14.65
   2  17   6  409.81   13.71
  -2 -17  -7  108.71    9.78
   2  17   7  106.56    9.58
   2  17   7   92.72    8.97
  -2  17  -7   94.20   10.45
   2 -17   7   97.42   11.52
   2  17   8  122.38   10.43
  -2  17  -8  113.82   11.06
   2 -17   8  132.45   12.96
   2  17   8  119.76    9.14
   2  17   9   54.33    7.76
   2 -17   9   78.34   11.71
   2  17   9   57.98   10.04
  -2  17 -10   75.51   10.41
   2  17  10   61.51    9.86
   2 -17  10   66.93   12.11
  -2  17 -11   72.05   10.41
   2  17  12  188.39   13.86
   2 -17  12  156.87   14.39
  -2  18  12  186.16   12.72
  -2 -18  12  171.82   13.93
   2  18 -12  171.12   14.50
   2  18 -11   -5.26    9.99
  -2  18  11   12.60    7.58
  -2 -18  11   -1.97   10.42
  -2  18  10    9.46    7.17
   2  18 -10   25.58   10.45
  -2 -18  10   19.99   10.34
   2 -18  -9   10.77    7.13
   2  18  -9   -5.41   10.04
  -2  18   9   -0.40    6.38
  -2 -18   9  -14.26   10.40
   2 -18  -8  206.66   11.42
   2  18  -8  212.18   13.95
  -2 -18   8  198.19   13.52
   2 -18  -7   -8.37    7.56
  -2 -18   7   17.24    9.34
   2  18  -7   -5.56    8.52
   2 -18  -6  669.01   17.37
  -2 -18   6  660.10   19.17
   2  18  -6  671.53   19.15
   2 -18  -5   -6.38    7.63
  -2 -18   5   10.90    8.67
   2  18  -5   13.30    8.19
  -2  18   5   -2.45    7.52
  -2  18   4  585.11   15.98
   2  18  -4  575.01   16.92
  -2 -18   4  531.07   16.78
   2 -18  -4  527.38   14.43
  -2 -18   3   20.03    8.37
   2 -18  -3   16.73    6.65
   2 -18  -2   13.28    6.87
  -2 -18   2   11.68    7.98
  -2  18   2   -1.25    7.71
  -2 -18   1   30.65    5.98
   2  18  -1   20.96    6.86
  -2 -18   0  428.33   11.32
   2  18   0  442.76   14.68
   2 -18   0  447.59   14.08
  -2  18   0  439.12   14.89
   2  18   0  412.82   13.13
  -2 -18   0  445.94   14.78
  -2  18  -1   11.36    7.97
   2 -18   1   14.92    8.03
   2  18   1   11.34    6.40
   2  18   2  702.65   15.80
  -2 -18  -2  729.65   14.88
  -2  18  -2  717.32   18.00
   2 -18   2  678.53   17.62
   2  18   2  751.45   18.27
  -2  18  -3  -10.25    7.76
  -2 -18  -3   -0.28    5.81
   2 -18   3   -1.98    8.48
   2  18   4  218.79    9.85
   2  18   4  225.08   11.53
  -2 -18  -4  212.17   10.27
  -2  18  -4  249.50   12.94
   2 -18   4  237.28   12.92
  -2  18  -5    4.73    8.27
  -2 -18  -5   10.22    6.68
   2  18   5    8.19    7.60
   2 -18   5   24.05    9.74
   2  18   5    9.96    5.53
   2  18   6   50.50    8.29
   2 -18   6   42.67   10.25
  -2  18  -6   55.14    9.55
  -2 -18  -6   44.26    8.32
   2  18   7    9.19    7.46
  -2  18  -7    5.41    8.48
   2 -18   7   -4.38   10.70
  -2 -18  -7    1.75    8.22
  -2 -18  -8  396.42   15.61
   2  18   8  436.32   14.55
   2 -18   8  432.10   18.49
   2  18   8  404.21   15.33
   2  18   9    3.59    8.24
   2 -18   9  -10.42   11.27
  -2  18  -9   -5.05    8.93
  -2  18 -10  210.35   13.82
   2 -18  10  190.98   15.44
   2  18  10  197.59   13.42
   2  18  11    3.73    9.14
  -2  18 -11    3.10    8.78
   2 -18  11   -8.69   11.05
   2 -18  12   38.46   12.00
   2  19 -11   36.05   11.44
  -2 -19  11   15.08   10.67
  -2 -19  10  235.49   15.33
   2  19 -10  200.60   15.49
   2  19  -9   -0.90   10.15
  -2 -19   9   -4.12   10.75
   2  19  -8  130.76   12.70
   2 -19  -8  128.45   10.66
  -2 -19   8  118.28   12.19
   2 -19  -7   96.15    9.67
  -2 -19   7  100.34   12.21
  -2 -19   6   38.85   10.28
   2 -19  -5  134.61   10.48
   2  19  -5  127.11   11.23
  -2 -19   5  154.05   12.22
  -2  19   5  110.59    9.62
  -2 -19   4  294.61   14.45
  -2  19   4  288.64   12.84
   2  19  -4  312.11   13.84
   2 -19  -4  295.50   12.19
  -2 -19   3   16.24    8.98
  -2  19   3   16.66    7.90
  -2  19   2  419.73   14.73
   2  19  -2  407.47   14.40
  -2 -19   2  364.38   15.03
   2 -19  -2  399.10   13.84
  -2  19   1   85.44    9.23
   2  19  -1   66.64    8.65
  -2 -19   1  103.60   10.98
   2 -19  -1   92.87    9.43
  -2 -19   0  169.43   11.56
   2  19   0  164.53    9.81
  -2  19   0  156.53   10.90
   2 -19   0  131.63   10.62
  -2 -19  -1  267.82   13.00
   2  19   1  265.55   13.13
   2 -19   1  294.30   13.27
   2  19   1  264.48   11.65
  -2 -19  -1  278.86   10.35
  -2  19  -1  277.71   13.19
   2  19   2   13.65    7.97
  -2  19  -2   15.28    8.21
   2 -19   2   14.22    9.02
   2  19   2   16.76    6.66
  -2 -19  -2    6.75    6.00
  -2 -19  -3  245.76   10.44
   2  19   3  243.88   10.70
  -2  19  -3  252.27   13.24
   2  19   3  256.08   12.98
   2 -19   3  279.50   13.80
  -2 -19  -4  472.67   13.97
   2  19   4  448.52   13.20
  -2  19  -4  446.13   16.25
   2 -19   4  476.89   17.07
   2  19   4  463.34   15.28
   2 -19   5   25.12    9.82
   2  19   5   14.18    5.93
   2  19   6  285.09   12.96
  -2  19  -6  250.87   14.13
   2 -19   6  283.12   15.50
  -2 -19  -6  248.45   12.29
   2  19   7   17.86    7.72
   2 -19   7   25.68   10.68
  -2 -19  -8   92.88   10.49
   2  19   8  112.42    9.85
   2 -19   8   72.89   12.99
  -2  19  -8   82.30   10.91
   2  19   9  130.23   11.09
  -2  19  -9  122.72   11.97
   2 -19   9  129.76   14.38
  -2 -19  -9  127.57   11.64
   2  19  10   44.92    9.79
  -2  19 -10   47.82   10.16
   2  19  11   18.15    9.40
   2  20 -10   -5.15   10.85
  -2 -20  10   12.43   11.16
   2  20  -9  292.20   16.56
  -2 -20   9  282.40   16.62
  -2 -20   8   -7.92   10.88
   2  20  -8   -7.97    9.56
   2 -20  -8    3.08    8.06
  -2 -20   7   58.65   11.29
   2  20  -7   51.10   10.82
   2 -20  -6   96.84    9.50
  -2 -20   6   95.80   11.78
   2 -20  -5   75.37    9.43
   2  20  -5   43.69    9.66
  -2 -20   5   67.40   11.63
   2  20  -4   23.67    9.17
  -2 -20   4    8.47    9.57
  -2  20   3  338.49   14.43
  -2 -20   3  343.46   15.81
   2  20  -3  338.47   14.12
   2 -20  -3  306.66   12.78
   2 -20  -2   18.66    7.91
  -2 -20   2   -4.92    9.22
  -2  20   2    0.98    8.28
   2  20  -2   12.09    7.71
   2  20  -1  621.58   17.11
   2 -20  -1  667.49   18.04
  -2  20   1  652.33   18.27
   2  20   0  163.48   10.53
  -2  20   0  167.89   11.39
   2 -20   0  139.66   11.28
  -2 -20   0  130.55   11.74
   2 -20   1   -1.60    8.99
  -2 -20  -1    3.39    8.48
   2  20   1    5.86    7.35
  -2  20  -1    2.22    8.32
   2  20   2   97.39   10.79
   2 -20   2   69.25   10.29
  -2 -20  -2  101.77   10.68
  -2  20  -2   95.61   10.52
   2  20   2   95.60    8.90
   2  20   3   61.47    9.87
   2  20   3   52.54    7.54
  -2  20  -3   71.05   10.54
  -2 -20  -3   57.78    7.54
   2 -20   3   81.75   10.70
  -2 -20  -4   42.80    7.86
   2  20   4   36.83    8.56
  -2  20  -4   43.53   10.11
   2  20   4   32.52    6.99
   2  20   5  292.88   11.45
  -2 -20  -5  309.75   12.54
   2 -20   5  315.04   15.66
   2  20   5  343.13   14.18
  -2  20  -5  306.57   15.06
  -2  20  -6   15.75    8.88
   2  20   6   37.05    8.45
  -2 -20  -6   18.91    7.76
   2 -20   6   18.22   10.61
  -2 -20  -7  229.31   12.68
  -2  20  -7  194.00   13.81
   2  20   7  217.07   12.06
   2 -20   7  246.86   15.97
   2  20   8   12.08    7.11
  -2  20  -8    0.93    9.14
  -2 -20  -8    9.26    8.15
   2 -20   9   15.07   12.52
  -2  20  -9    3.44    9.59
   2 -20  10   71.10   13.36
   2  20  10   49.07    9.38
  -2  20 -10   85.19   12.00
   2  20  11   91.47   10.85
  -2  20 -11   86.24   11.58
  -2 -20 -11   93.06   11.63
   2  21  -9   10.45   10.70
  -2 -21   9   -4.76   11.11
   2 -21  -8    6.92    7.62
  -2 -21   8    9.03   10.95
   2  21  -8    9.83   10.62
  -2 -21   7  145.74   13.95
   2  21  -7  157.95   13.34
   2 -21  -7  163.47   11.23
  -2 -21   6    5.80   10.14
   2  21  -6   -5.58    9.84
   2 -21  -6   -6.40    8.13
   2 -21  -5  362.57   14.83
   2  21  -5  362.94   16.49
  -2 -21   5  366.90   17.13
  -2 -21   4   29.36   10.42
  -2  21   4   54.76    9.43
   2 -21  -4   36.63    8.50
   2  21  -3   49.71   10.01
  -2  21   3   52.68   10.06
  -2 -21   2   12.77    9.85
  -2  21   2    2.91    8.47
   2  21  -2   14.19    8.31
   2 -21  -2  -15.52    8.71
  -2  21   1   81.92   10.41
  -2 -21   1   97.71   11.64
   2  21  -1   78.05   10.18
   2 -21  -1   97.47   10.80
  -2  21   0   26.41    8.76
  -2 -21   0   24.31    9.73
   2 -21   0   15.52    9.04
   2 -21   1  639.09   19.51
  -2  21  -1  603.58   18.69
   2  21   1  599.23   16.61
  -2 -21  -1  653.00   19.47
  -2 -21  -2    1.06    9.24
  -2  21  -2   12.26    9.13
   2 -21   2   -8.31   10.26
   2  21   3  334.20   12.91
  -2 -21  -3  368.03   15.62
   2 -21   3  365.71   16.84
   2  21   3  367.42   15.17
  -2  21  -3  341.82   15.58
   2  21   4   -3.59    6.17
   2 -21   4    2.28   10.04
  -2 -21  -4    3.04    8.67
  -2  21  -4   10.49    9.68
   2  21   4    0.48    8.91
  -2 -21  -5   -7.62    7.35
   2  21   5    7.54    8.52
   2 -21   5   10.13   10.46
  -2  21  -5   -2.90    9.22
   2  21   6   -3.13    7.98
   2 -21   6  -18.16   10.94
  -2  21  -6    0.25    8.98
  -2 -21  -6   -1.44    8.25
  -2 -21  -7   72.68    9.47
   2  21   7   92.76   10.02
  -2  21  -7   52.63   11.10
   2 -21   7   73.06   12.62
  -2 -21  -8   -5.24    8.83
  -2  21  -8   -7.50    9.81
   2 -21   8    0.23   12.20
  -2 -21  -9  299.89   14.82
  -2  21  -9  326.74   17.26
   2 -21   9  311.36   18.35
  -2  21 -10  -13.14   10.38
  -2 -21 -10   14.55    8.86
   2  22  -8   76.55   12.68
  -2 -22   8   68.93   13.22
   2  22  -6   89.14   11.75
   2 -22  -6   76.37    9.78
  -2 -22   6   73.72   12.76
   2 -22  -5   13.67    8.48
   2  22  -5   -9.15    9.75
  -2 -22   5  -17.55   10.81
   2 -22  -4  100.61   10.70
  -2  22   4   83.11   10.08
   2  22  -4   65.35   11.43
   2  22  -3  246.33   14.15
  -2  22   3  287.79   14.50
   2 -22  -3  263.47   13.36
  -2 -22   3  282.51   15.79
  -2 -22   2    2.80    9.96
   2  22  -2    1.39    8.91
   2 -22  -2   -0.24    8.61
  -2 -22   1  164.50   12.95
  -2  22   1  184.68   12.89
   2 -22  -1  179.68   12.46
   2  22  -1  171.94   12.20
   2 -22   0  117.63   11.26
  -2  22   0   87.55   11.06
   2  22   0  103.86   10.36
  -2 -22   0  105.05   11.85
   2  22   1   53.59    9.07
  -2 -22  -1   45.49   10.38
   2 -22   1   59.96   11.20
  -2  22  -1   65.23   10.77
  -2 -22  -2  145.59   12.23
  -2  22  -2  120.96   12.28
   2  22   2  138.14   10.41
   2 -22   2  139.36   13.03
  -2  22  -3  184.43   13.00
   2  22   3  203.42   11.33
   2 -22   3  212.59   14.67
  -2 -22  -3  180.10   13.45
  -2 -22  -4   12.56    9.26
  -2  22  -4    5.03    9.38
  -2 -22  -5  114.43   10.92
   2 -22   5  133.03   14.00
   2  22   5  111.64   10.94
   2  22   6   13.09    8.31
  -2 -22  -6    2.89    8.53
  -2  22  -6    4.49    9.37
   2  22   7  148.90   11.46
  -2  22  -7  154.56   13.73
   2 -22   7  191.40   15.23
   2 -22   8  122.64   14.92
  -2  22  -8   98.26   12.36
  -2 -23   7   10.92   11.49
   2 -23  -7   13.01    8.27
   2  23  -7   20.06   11.28
   2 -23  -6    6.32    8.13
   2  23  -6    2.85   10.53
  -2 -23   6  -18.72   11.73
   2  23  -5   28.17   10.77
   2 -23  -5   22.10    8.58
   2 -23  -4   82.66   10.24
  -2  23   4  114.31   11.53
   2  23  -4   84.03   11.40
  -2 -23   4   87.20   12.85
  -2 -23   3   10.61   11.04
  -2  23   3   -0.46    8.25
   2  23  -2  323.69   15.43
  -2  23   2  280.67   14.06
   2 -23  -2  297.22   14.82
  -2 -23   2  281.35   16.04
   2  23  -1    7.86    9.00
  -2 -23   1    8.62   10.50
   2 -23  -1   20.75    9.48
  -2  23   0  118.14   11.76
   2  23   0  122.62   11.11
   2 -23   0  141.59   12.81
  -2 -23   0  138.81   12.57
   2 -23   1  132.59   13.10
   2  23   1  103.24   10.65
  -2  23  -1  111.02   11.61
  -2 -23  -1   87.60   11.13
  -2 -23  -2   -1.04   10.08
   2  23   2   13.00    7.47
   2 -23   2   11.37   10.69
   2  23   3    8.29    7.22
  -2  23  -3    7.90   10.03
  -2 -23  -3   19.22    9.10
  -2 -23  -4  180.30   13.47
   2  23   4  172.24   10.75
  -2  23  -4  185.99   14.10
   2 -23   4  152.60   14.34
  -2 -23  -5    8.59    9.01
  -2  23  -5    9.42   10.35
   2 -23   5   -0.79   11.75
  -2 -23  -6  249.23   14.17
  -2  23  -6  201.24   14.86
   2 -23   6  212.81   16.18
  -2  23  -7   17.33   10.73
   2 -24  -6  209.47   12.82
  -2 -24   5  -12.14   11.33
   2 -24  -5    4.53    7.93
   2  24  -5    5.49   10.71
   2 -24  -4  132.77   11.72
   2  24  -4  117.07   12.77
  -2  24   4  125.48   11.58
  -2 -24   4  132.96   14.35
  -2 -24   3   -2.78   11.00
   2  24  -3   -8.39   10.07
  -2  24   3   -1.18    8.85
  -2 -24   2   -8.07   11.22
   2  24  -2    8.09    9.53
  -2  24   2    3.40    9.00
   2 -24  -2   -9.25    8.71
  -2 -24   1   16.89   10.13
  -2  24   1   -1.67    9.62
   2  24  -1   14.04    9.17
   2 -24  -1   19.43    9.64
  -2  24   0  213.50   14.04
   2  24   0  169.36   12.16
   2 -24   0  192.18   13.82
  -2 -24   0  185.57   14.51
   2  24   1    2.14    7.72
   2 -24   1  -14.90   10.51
  -2  24  -1  -19.22   10.53
   2  24   2  197.08   12.13
   2 -24   2  184.78   14.41
  -2 -24  -2  160.45   13.92
  -2  24  -2  160.85   13.65
  -2 -24  -3  -11.18   10.49
   2  24   3    8.85    7.04
  -2  24  -3    3.20   10.00
   2 -24   3  -11.84   10.84
   2 -24   4  115.66   14.12
  -2  24  -4   75.44   12.34
  -2 -24  -5   10.42    9.02
   2 -24   5    4.28   12.47
   2 -25  -3   -7.52    9.07
   2  25  -3   -1.04    9.68
  -2  25   3   -6.04    9.03
  -2  25   2  154.71   12.86
  -2 -25   2  190.01   15.21
   2  25  -2  197.99   13.83
   2  25  -1   -6.19    9.35
   2  25   0   68.00   10.45
   2 -25   0   58.78   11.16
  -2 -25   0   81.15   12.82
  -2  25   0   53.75   11.15
  -2  25  -1   90.01   12.02
   2 -25   1  117.49   13.37
   2  25   1   82.62    9.95
  -2 -25  -1   91.68   12.46
  -2  25  -2   17.04   10.52
  -2 -25  -2   14.38   10.81
   2  25   2   10.46    7.72
   2 -25   2   16.21   11.15
   2  25   3  105.14    9.65
  -2 -25  -3   65.88   11.76
  -2 -25  -4   57.73   10.96
   2 -26  -1  112.76   12.18
   2 -26   0   32.41   10.63
  -3   0  16    5.86    9.56
  -3   0  15  399.36   16.86
  -3   0  14   -7.72    8.82
  -3   0  13   54.65    9.42
   3   0 -13   47.58    7.31
  -3   0  12   11.27    7.61
   3   0 -12    4.00    6.23
   3   0 -11  112.83    8.30
  -3   0  11  116.77    9.40
   3   0 -10    7.91    6.10
  -3   0  10   -6.78    6.28
  -3   0   9 1161.83   18.69
   3   0  -9 1199.21   17.86
   3   0  -8   -0.79    5.94
  -3   0   8    7.37    5.83
  -3   0   7 1096.20    7.57
   3   0  -7 1065.62   15.84
  -3   0   7 1062.49   15.51
  -3   0   6   -0.82    4.26
   3   0  -6    7.80    5.37
  -3   0   5  240.18    6.93
  -3   0   5  232.66    3.07
   3   0  -5  231.57    7.90
  -3   0   4    3.79    3.30
   3   0  -4   -3.83    4.44
   3   0  -3 3774.06   12.61
  -3   0   3 3749.84   20.70
   3   0  -3 3744.71   23.35
   3   0  -2    0.52    1.50
   3   0  -2    5.13    3.32
   3   0  -1 9272.80   25.24
  -3   0   1 9235.92   27.65
   3   0   0   -0.01    2.25
   3   0   0    0.13    2.70
   3   0   1 6504.70   25.41
  -3   0  -1 6563.84   21.01
   3   0   1 6417.25   23.20
   3   0   2    1.90    1.93
  -3   0  -2    1.26    2.12
   3   0   3  325.19    5.94
   3   0   3  313.93    7.28
   3   0   3  314.32    4.40
   3   0   4    2.16    1.35
   3   0   4    0.01    3.58
   3   0   4    4.95    2.70
   3   0   5 2256.21   18.06
   3   0   5 2238.33   19.99
   3   0   6   -0.40    3.92
   3   0   6   -2.33    4.25
   3   0   7 1404.50   17.70
   3   0   7 1352.35   16.84
   3   0   8    2.90    4.64
   3   0   8    2.24    4.95
   3   0   9  853.21   15.36
   3   0   9  907.17   15.80
   3   0  10   12.68    5.85
   3   0  10    5.84    5.65
   3   0  11  599.40   14.58
   3   0  11  563.09   13.92
   3   0  12   -1.24    6.41
   3   0  13  296.09   11.60
   3   0  13  282.24   12.50
   3   0  14   -0.22    7.68
   3   0  14   -9.49    6.46
   3   0  15  286.59   14.03
   3   0  16   -4.41    8.30
  -3  -1  16  105.47   12.33
  -3   1  16  111.16   11.78
  -3   1  15   59.15   10.59
  -3  -1  15   68.54   10.21
  -3  -1  14   16.03    8.54
  -3   1  14   17.13    8.69
  -3   1  13  460.43   16.10
  -3  -1  13  464.39   16.07
   3  -1 -13  476.74   13.88
   3   1 -13  460.95   13.64
   3   1 -12   10.73    6.23
   3  -1 -12   -5.51    6.29
  -3   1  12    5.03    7.66
  -3  -1  12   -0.53    7.53
  -3  -1  11  318.54   12.53
   3  -1 -11  356.77   11.78
   3   1 -11  323.87   11.29
  -3   1  11  341.36   12.94
  -3  -1  10  257.26   10.84
  -3   1  10  295.76   11.54
   3   1 -10  272.34    9.92
   3  -1 -10  264.15   10.06
   3  -1  -9  261.58    9.72
   3   1  -9  248.51    9.68
  -3   1   9  267.50   10.50
  -3  -1   9  247.81   10.18
  -3  -1   8  374.63    5.91
   3   1  -8  363.19   10.64
  -3  -1   8  382.49   10.88
   3  -1  -8  358.65   10.64
  -3   1   8  374.36   11.07
   3   1  -7 1877.70   20.41
  -3  -1   7 1875.55   11.67
   3  -1  -7 1898.83   20.85
  -3   1   7 1822.02   20.08
  -3  -1   7 1831.64   19.95
  -3  -1   6   14.86    4.55
  -3   1   6    5.56    4.38
   3   1  -6   10.72    5.26
  -3  -1   5 1373.47    8.67
  -3  -1   5 1387.49   15.00
   3   1  -5 1399.21   16.02
  -3   1   5 1377.51   14.92
   3  -1  -5 1438.77   16.69
   3   1  -4  293.58    4.12
  -3   1   4  322.70    7.16
   3   1  -4  323.48    8.26
  -3  -1   4  310.13    7.08
   3  -1  -4  321.44    8.31
  -3  -1   3 3126.62   19.38
   3   1  -3 3112.60   13.13
   3  -1  -3 3076.54    9.79
   3  -1  -3 3096.79   21.69
  -3   1   3 3127.34   18.73
   3   1  -3 2984.73   20.71
   3   1  -2 1328.88    9.48
   3  -1  -2 1287.57    8.06
  -3   1   2 1326.63   11.44
   3  -1  -2 1277.84   13.52
  -3  -1   2 1326.07   11.83
   3   1  -2 1255.32   12.92
   3   1  -1   44.42    3.80
   3   1  -1   44.31    2.76
   3  -1  -1   48.22    2.60
  -3  -1   1   46.08    3.21
  -3   1   1   46.25    2.90
   3  -1  -1   49.72    3.81
  -3   1   0 2657.68   13.31
  -3  -1   0 2655.93   14.43
   3   1   0 2631.22   15.59
   3  -1   0 2611.16   15.15
   3  -1   0 2594.80   16.30
   3   1   0 2575.53   15.60
  -3  -1  -1 1754.83   11.74
   3   1   1 1775.72   13.71
   3  -1   1 1715.35   13.63
  -3   1  -1 1776.57   10.49
   3   1   1 1666.56   11.51
   3  -1   1 1705.00   12.44
   3  -1   2   50.23    2.70
   3   1   2   48.39    3.59
   3  -1   2   60.53    3.95
   3   1   2   62.45    2.70
  -3  -1  -2   60.86    3.17
  -3   1  -2   52.67    2.58
   3  -1   3 3206.12   16.45
   3   1   3 3230.82   18.40
   3   1   3 3213.10   11.50
   3  -1   3 3176.93   14.42
   3   1   3 3106.08   20.57
   3  -1   3 3255.74   21.55
   3  -1   4   19.86    1.89
   3   1   4   20.16    3.17
   3  -1   4   14.97    2.74
   3   1   4   18.97    3.76
   3  -1   4   23.44    4.21
   3  -1   5   69.40    2.38
   3   1   5   75.43    4.89
   3  -1   5   72.56    4.32
   3   1   5   79.89    5.22
   3   1   6 1085.57   14.46
   3  -1   6 1087.98   13.61
   3  -1   6 1083.67    6.99
   3  -1   6 1078.43   15.16
   3   1   6 1088.38   14.75
   3   1   7   70.69    5.94
   3  -1   7   69.04    5.49
   3   1   7   77.30    6.03
  -3   1  -7   62.67    2.11
   3  -1   7   73.44    6.25
   3   1   8  195.50    8.34
   3  -1   8  211.19    8.02
   3   1   8  212.31    8.42
   3  -1   8  228.02    8.83
   3   1   9 1288.07   19.08
   3  -1   9 1225.22   17.83
   3  -1   9 1299.58   19.03
   3   1   9 1249.37   18.00
   3   1  10   -5.97    6.25
   3  -1  10   -0.76    5.48
   3   1  10    1.60    5.52
   3  -1  10    1.82    5.83
   3   1  11  517.67   14.29
   3  -1  11  561.66   14.33
   3  -1  11  530.28   13.74
   3   1  11  534.83   13.54
   3   1  12  125.18    8.72
   3   1  12  106.76    9.16
   3  -1  12  116.94    8.86
   3  -1  12  103.66    8.57
   3   1  13    9.08    7.40
   3   1  13    7.30    6.10
   3  -1  13   13.03    6.73
   3  -1  13   17.50    7.20
   3   1  14  170.85   11.33
   3  -1  14  191.22   11.44
   3   1  14  165.53    9.76
   3  -1  14  150.14    9.49
   3   1  15   81.42   10.29
   3  -1  15   99.10   10.23
   3  -1  15   92.28    8.98
   3   1  16    2.13    8.72
   3  -1  16    5.59    8.20
   3   1  17  173.35   12.83
   3  -1  17  173.72   12.86
  -3  -2  16   22.37   10.08
  -3   2  16    4.04    9.53
  -3  -2  15  122.00   11.56
  -3   2  15  116.92   11.45
  -3   2  14  157.17   12.13
  -3  -2  14  179.59   12.52
  -3  -2  13   -6.11    8.58
   3   2 -13   -1.81    6.43
  -3   2  13    2.97    8.20
   3  -2 -13   -5.22    6.48
  -3  -2  12  880.91   20.01
  -3   2  12  874.10   20.06
   3  -2 -12  890.25   17.57
   3   2 -12  841.60   17.31
  -3   2  11   28.23    7.37
   3  -2 -11   37.42    6.99
   3  -2 -10  292.21   10.48
  -3   2  10  262.46   11.21
  -3  -2  10  269.66   11.00
   3   2 -10  259.44   10.08
  -3   2   9  566.75   13.81
   3   2  -9  551.10   12.87
   3  -2  -9  596.62   13.48
  -3  -2   9  560.91   13.55
  -3   2   8    0.45    5.78
  -3  -2   8    4.70    5.57
  -3  -2   8    6.17    2.73
   3   2  -8    0.31    5.35
   3  -2  -8   10.16    6.66
  -3  -2   7  279.30    8.93
  -3  -2   7  295.42    5.73
  -3   2   7  286.25    9.08
   3  -2  -7  287.14    9.66
   3   2  -7  287.27    9.22
   3  -2  -6  977.87   15.07
  -3   2   6  975.64   14.01
   3   2  -6  926.68   14.02
  -3  -2   6  959.44    8.91
  -3  -2   6  955.31   13.72
  -3  -2   5    2.99    1.94
  -3   2   5    3.58    3.64
  -3  -2   5    5.46    4.12
   3  -2  -5    3.08    4.77
  -3   2   4 2111.22   16.96
   3   2  -4 2072.75   11.95
  -3  -2   4 2104.63   17.17
   3   2  -4 2057.02   18.13
   3  -2  -4 2172.94   19.59
   3   2  -3 1270.98   13.56
   3   2  -3 1288.81    9.61
   3  -2  -3 1291.75    5.56
  -3  -2   3 1333.88   13.09
   3  -2  -3 1354.62   14.77
  -3   2   3 1331.19   12.32
   3  -2  -2  111.78    5.02
   3   2  -2  117.36    3.53
  -3   2   2  125.77    4.14
   3  -2  -2  114.04    2.69
  -3  -2   2  129.35    4.62
   3   2  -2  120.32    4.88
  -3  -2   1  160.08    4.56
   3   2  -1  145.01    4.10
  -3   2   1  168.34    4.14
   3  -2  -1  174.85    5.41
   3  -2  -1  157.18    3.84
   3   2  -1  160.00    4.81
   3  -2   0  492.35    7.61
  -3   2   0  492.14    5.82
   3   2   0  490.11    7.31
   3  -2   0  476.20    7.03
  -3  -2   0  480.45    6.72
   3   2   0  496.27    6.97
   3  -2   1 1805.63   13.14
   3   2   1 1815.54   11.39
  -3  -2  -1 1800.78   12.51
   3   2   1 1757.41   13.94
  -3   2  -1 1810.77   10.00
   3  -2   1 1764.45   14.22
   3  -2   2 9842.32   29.26
  -3   2  -2 9999.00   23.82
   3   2   2 9897.66   34.95
   3   2   2 9902.08   22.78
  -3  -2  -2 9859.69   30.98
   3  -2   3  600.43    7.20
   3  -2   3  607.26    6.93
   3   2   3  594.43    8.72
   3   2   3  595.99    9.55
   3   2   3  619.32    4.61
   3  -2   3  591.77    9.95
   3   2   4 1399.82   14.04
   3  -2   4 1353.15   11.58
  -3   2  -4 1285.87   10.23
   3   2   4 1308.12   14.57
   3  -2   4 1408.92   15.81
   3   2   5  325.32    8.03
   3  -2   5  304.35    6.67
  -3   2  -5  288.73    5.00
   3   2   5  309.82    8.05
   3  -2   5  322.82    8.79
   3   2   6  535.00   10.82
   3  -2   6  504.19    9.40
  -3   2  -6  490.84    6.35
   3   2   6  495.44   10.45
   3  -2   6  524.76   11.39
   3   2   7  612.92   12.49
   3  -2   7  614.37   10.99
  -3   2  -7  587.54    6.88
   3   2   7  611.50   11.98
   3  -2   7  653.37   13.01
   3  -2   8  376.08    9.72
   3  -2   8  390.01   11.09
   3   2   8  400.22   10.42
   3   2   9  101.23    7.70
   3  -2   9   86.62    6.53
   3   2   9  106.13    7.08
   3  -2   9  105.15    7.71
   3   2  10  826.61   16.84
   3  -2  10  792.38   15.36
   3   2  10  818.11   15.61
   3  -2  10  800.86   16.10
   3  -2  11   59.05    6.96
   3   2  11   59.30    7.89
   3   2  11   48.26    6.67
   3  -2  11   44.53    6.89
   3   2  12  105.00    9.39
   3  -2  12   90.91    8.35
   3   2  12  100.24    8.03
   3  -2  12   93.34    8.32
   3   2  13  129.47   10.35
   3  -2  13  123.15    9.52
   3   2  13  124.27    8.86
   3  -2  13  113.68    8.95
   3  -2  14   17.02    7.41
   3  -2  14   14.33    6.95
   3  -2  15   57.05    8.83
   3  -2  15   45.30    7.52
   3  -2  16  154.09   11.68
   3   2  16  168.94   12.81
   3   2  17   -4.40    9.17
  -3  -3  16  299.28   15.77
  -3   3  16  292.48   15.79
  -3   3  15   14.49    8.90
  -3   3  14  191.43   13.09
   3   3 -14  166.01   10.25
  -3  -3  14  190.49   12.43
   3   3 -13    0.54    6.51
   3  -3 -13   -0.14    6.32
  -3   3  13    9.64    7.95
  -3  -3  13    1.33    8.08
  -3   3  12    5.31    8.05
   3  -3 -12    4.26    6.30
  -3  -3  12    1.90    7.39
  -3  -3  11   -3.36    7.17
   3   3 -11    1.38    6.14
  -3   3  11   -4.86    7.07
   3  -3 -11   -1.00    6.19
   3  -3 -10  690.39   14.94
  -3  -3  10  694.89   15.75
  -3   3  10  687.69   16.23
   3   3 -10  676.33   14.73
   3   3  -9   -5.42    5.81
  -3  -3   9   -3.82    5.84
  -3  -3   9    1.18    3.01
  -3   3   9    4.42    6.46
  -3  -3   8 1740.36   14.62
  -3   3   8 1691.84   21.26
   3   3  -8 1697.60   20.36
  -3  -3   8 1726.20   20.96
  -3  -3   7   50.81    6.12
  -3  -3   7   52.59    3.67
   3   3  -7   40.80    5.87
  -3   3   7   51.51    5.94
   3  -3  -7   44.91    6.58
   3   3  -6  400.52    9.99
   3  -3  -6  397.17   10.61
  -3  -3   6  394.44    9.56
  -3   3   6  397.66    9.62
  -3  -3   6  385.28    6.50
  -3  -3   5  115.35    5.87
   3   3  -5  107.32    6.18
  -3   3   5  107.53    5.56
   3  -3  -5  119.43    6.87
  -3  -3   5  103.92    3.84
   3   3  -4  854.67    8.72
  -3  -3   4  906.11   11.91
   3   3  -4  866.68   12.22
   3  -3  -4  890.23   13.00
  -3   3   4  887.63   11.27
  -3  -3   3  382.34    7.66
   3  -3  -3  377.24    3.18
   3   3  -3  371.34    5.91
  -3   3   3  381.64    7.03
   3   3  -3  376.60    7.89
   3  -3  -3  390.95    8.59
   3   3  -2 5821.67   22.48
  -3   3   2 5630.44   22.83
   3  -3  -2 5731.66   17.85
   3   3  -2 5618.61   25.89
  -3  -3   2 5761.84   25.32
   3  -3  -2 5773.88   28.10
  -3  -3   1  187.66    5.06
   3  -3  -1  185.08    5.58
   3   3  -1  175.42    4.76
  -3   3   1  175.35    4.06
   3  -3  -1  167.64    4.27
   3   3  -1  197.72    5.19
   3  -3   0 6571.60   27.37
   3   3   0 6467.31   26.71
  -3  -3   0 6480.02   24.55
   3  -3   0 6381.53   25.45
   3   3   0 6475.14   23.71
  -3   3   0 6504.35   19.57
  -3   3  -1   95.48    2.60
  -3  -3  -1   86.48    3.64
   3   3   1   99.02    4.30
   3  -3   1   94.38    4.65
   3  -3   1   92.58    3.96
   3   3   1   97.72    3.13
  -3   3  -2  594.33    5.55
   3   3   2  598.63    9.33
  -3   3  -2  573.07    7.98
   3  -3   2  588.51    8.08
   3  -3   2  605.93    9.71
   3   3   2  583.87    5.65
  -3  -3  -2  617.88    8.43
   3  -3   3  259.68    4.32
   3   3   3  278.98    6.61
   3  -3   3  271.64    7.49
   3   3   3  259.35    6.90
   3   3   3  257.62    3.20
  -3   3  -3  260.99    4.35
  -3   3  -3  253.17    5.51
   3   3   4  770.77   10.96
   3  -3   4  750.02    8.24
  -3   3  -4  730.14    8.75
   3   3   4  723.46   11.31
   3  -3   4  766.37   12.30
   3  -3   5  487.36   10.70
   3   3   5  488.00    9.84
   3  -3   5  472.24    7.74
   3   3   5  488.80   10.02
  -3   3  -5  457.06    7.06
  -3   3  -6 2145.32   14.90
   3   3   6 2350.28   21.92
   3  -3   6 2263.05   18.02
   3   3   6 2210.84   20.96
   3  -3   6 2278.06   22.58
   3  -3   7   92.38    5.36
   3   3   7   98.68    6.60
   3  -3   7  106.78    7.35
  -3   3  -7   82.33    3.74
   3   3   7   92.36    6.85
   3   3   8  619.80   12.61
  -3   3  -8  565.96    8.03
   3   3   8  603.46   13.49
   3  -3   8  608.38   11.68
   3  -3   8  630.82   13.84
   3   3   9  189.62    9.07
   3  -3   9  187.86    7.74
   3   3   9  185.51    8.38
   3  -3   9  191.41    9.26
   3   3  10   13.02    6.44
   3  -3  10   10.87    5.30
   3   3  10    7.77    5.17
   3   3  11   -5.45    6.44
   3  -3  11    1.34    5.58
   3   3  11   12.04    6.13
   3  -3  11   -1.07    6.58
   3   3  12  547.41   15.99
   3  -3  12  547.11   14.46
   3   3  12  545.48   14.36
   3  -3  12  514.05   14.70
   3   3  13   -2.92    7.97
   3  -3  13    8.49    6.66
   3   3  13    6.60    6.29
   3  -3  13   -0.86    6.72
   3  -3  14  493.19   15.47
   3   3  14  453.51   13.85
   3  -3  14  484.52   15.06
   3   3  15   -2.28    8.77
   3  -3  15    0.03    7.37
   3   3  16   80.16   10.74
  -3   4  16   10.64    9.87
  -3  -4  16   10.55    9.25
  -3   4  15   41.60    9.55
  -3   4  14  224.67   13.00
  -3  -4  14  218.17   13.27
   3   4 -14  220.00   11.36
  -3  -4  13  130.11   10.95
   3   4 -13  114.82    8.98
  -3   4  13  140.33   11.43
   3   4 -12  443.49   13.64
  -3   4  12  465.50   15.74
  -3  -4  12  493.17   15.88
   3  -4 -12  454.62   13.28
   3   4 -11  182.76    9.55
  -3   4  11  187.37   10.93
  -3  -4  11  161.28   10.18
   3  -4 -11  180.99    9.52
   3  -4 -10  267.07   10.77
   3   4 -10  274.80   10.35
  -3   4  10  253.17   11.22
  -3  -4  10  284.60   11.35
   3  -4  -9   72.35    7.59
   3   4  -9   58.10    6.97
  -3  -4   9   48.07    4.41
  -3   4   9   61.69    7.44
  -3  -4   9   59.81    7.00
  -3  -4   8   34.78    4.06
  -3  -4   8   31.60    6.10
  -3  -4   7  201.69    5.83
  -3  -4   7  202.27    8.19
  -3   4   7  189.48    8.24
   3   4  -7  203.01    8.53
   3  -4  -7  208.64    8.87
  -3   4   6 2265.94   21.39
  -3  -4   6 2296.23   21.18
   3   4  -6 2210.76   21.45
  -3  -4   6 2271.24   16.12
   3  -4  -6 2315.94   22.76
  -3  -4   5   86.82    3.99
   3   4  -5   94.62    5.99
  -3  -4   5   95.15    5.78
  -3   4   5   92.65    5.42
   3  -4  -5   93.73    6.40
  -3  -4   4 1037.63   13.05
   3   4  -4 1003.81   10.23
   3   4  -4  996.40   12.95
  -3   4   4 1015.00   12.32
   3  -4  -4 1022.73   13.97
  -3  -4   3 1348.80   13.78
   3  -4  -3 1365.70    7.51
   3   4  -3 1304.83   13.70
   3   4  -3 1344.49   11.66
  -3   4   3 1359.67   12.74
   3  -4  -3 1384.44   15.46
   3  -4  -2  330.81    7.78
  -3   4   2  343.73    5.99
  -3  -4   2  352.73    7.22
   3   4  -2  347.57    6.33
   3  -4  -2  333.84    5.20
   3   4  -2  325.73    6.94
   3  -4  -1 1644.77   15.17
  -3   4   1 1662.91   11.03
  -3  -4   1 1671.93   13.54
   3   4  -1 1669.12   13.50
   3  -4  -1 1638.98   12.15
   3   4  -1 1638.29   13.28
   3   4   0 3229.58   16.86
   3   4   0 3182.02   19.42
  -3   4   0 3232.47   13.26
  -3  -4   0 3255.30   18.30
   3  -4   0 3186.18   18.33
   3  -4   0 3142.45   20.30
   3   4   1  390.72    7.70
  -3   4  -1  378.51    7.36
   3   4   1  402.17    5.63
   3  -4   1  403.12    7.65
  -3   4  -1  383.77    4.27
  -3  -4  -1  390.63    6.90
   3  -4   1  394.83    7.44
  -3  -4  -2 3205.70   19.46
   3   4   2 3178.90   21.33
   3  -4   2 3239.33   21.57
  -3   4  -2 3240.62   19.78
   3   4   2 3225.42   13.60
  -3   4  -2 3138.99   11.10
   3   4   3    1.80    3.09
   3  -4   3    7.86    4.22
   3   4   3    5.69    3.21
  -3   4  -3    5.47    2.70
   3   4   3    6.87    1.33
   3   4   4 3432.29   24.05
   3   4   4 3535.73   23.59
   3  -4   4 3498.97   16.05
  -3   4  -4 3458.20   20.23
   3  -4   4 3486.79   25.16
   3   4   4 3486.63   10.46
   3   4   5 1069.18   14.48
   3  -4   5 1021.73   10.43
   3   4   5  974.73   13.89
  -3   4  -5 1022.79   11.39
   3  -4   5 1026.00   14.91
   3  -4   6    3.74    5.57
   3   4   6   -3.07    4.92
   3  -4   6    3.08    3.04
  -3   4  -6    4.96    3.00
   3  -4   7  328.69    7.99
   3   4   7  342.82    9.66
   3   4   7  346.66   10.30
  -3   4  -7  319.61    7.07
   3  -4   7  317.52   10.49
  -3   4  -8  371.11    7.53
   3  -4   8  386.99    9.25
   3  -4   8  398.73   11.87
   3   4   8  384.27   10.58
   3   4   8  397.28   11.67
   3  -4   9  107.44    6.65
   3   4   9   93.52    8.00
   3   4   9  109.69    7.41
   3  -4   9  111.44    8.55
   3  -4  10  833.66   17.09
   3   4  10  931.56   18.65
   3  -4  10  874.49   15.37
   3   4  10  893.45   16.43
   3   4  11  116.13    9.43
   3  -4  11   98.65    7.42
   3   4  11  118.19    7.96
   3  -4  11  107.73    8.57
   3   4  12  171.56   11.36
   3  -4  12  163.77    9.10
   3   4  12  162.73    9.21
   3  -4  12  167.55   10.51
   3  -4  13  108.43    9.57
   3   4  13  128.85   10.99
   3  -4  13  112.07    8.65
   3   4  13  119.45    8.29
   3  -4  14    8.76    7.58
   3   4  14    7.18    8.66
   3   4  14    1.01    6.28
   3  -4  14   -1.91    7.12
   3   4  15  115.69   11.47
   3  -4  15   97.42    9.18
   3   4  16  133.44   12.11
  -3  -5  16   -1.97    9.60
  -3   5  16   26.85   10.18
  -3   5  15   78.25   11.15
  -3  -5  15   58.32   10.25
   3   5 -14   68.36    8.68
  -3  -5  14   57.84    9.52
   3   5 -13  287.24   12.28
  -3  -5  13  315.27   13.92
  -3   5  13  305.01   14.20
   3   5 -12   57.31    7.84
  -3   5  12   64.59    9.16
  -3  -5  12   54.19    8.39
   3  -5 -12   63.52    7.59
  -3  -5  11  690.14   16.63
   3   5 -11  733.56   16.47
  -3   5  11  704.12   17.60
  -3  -5  10  175.03    6.80
   3   5 -10  165.35    8.96
  -3   5  10  153.66    9.60
   3  -5 -10  161.68    9.40
  -3  -5  10  172.56    9.71
  -3  -5   9   -0.97    5.96
   3   5  -9    9.97    5.77
  -3   5   9   -2.96    6.27
  -3  -5   9    4.78    3.69
   3  -5  -9  -11.20    6.70
  -3  -5   8  774.64   14.50
  -3  -5   8  775.90   11.44
   3   5  -8  767.13   14.68
   3  -5  -8  732.93   14.87
  -3   5   8  743.25   15.30
   3   5  -7  359.72   10.35
  -3  -5   7  386.40   10.33
  -3   5   7  389.97   10.83
  -3  -5   7  391.98    8.22
   3  -5  -7  370.39   11.21
  -3  -5   6  440.11   10.40
  -3   5   6  435.38   10.40
   3   5  -6  441.40   10.61
  -3  -5   6  428.73    8.09
   3  -5  -6  433.14   11.30
  -3   5   5 2829.83   22.56
  -3  -5   5 2888.89   22.62
   3   5  -5 2921.15   23.28
  -3  -5   5 2929.59   18.85
   3  -5  -5 2847.18   24.19
   3   5  -4   60.69    3.91
  -3  -5   4   60.17    5.16
   3   5  -4   52.89    5.02
  -3   5   4   73.20    4.71
   3  -5  -4   74.17    5.95
   3  -5  -3 1480.52   16.06
   3   5  -3 1516.95   13.20
   3   5  -3 1459.80   14.78
  -3  -5   3 1478.80   14.72
  -3   5   3 1451.40   13.52
   3  -5  -2  234.14    7.09
   3  -5  -2  231.86    4.85
   3   5  -2  225.80    5.65
   3   5  -2  223.68    6.17
  -3   5   2  237.05    5.26
  -3  -5   2  232.95    6.41
   3   5  -1    5.08    2.74
   3  -5  -1    8.21    3.59
   3  -5   0  324.40    7.48
   3   5   0  322.88    6.95
  -3  -5   0  326.30    6.64
  -3   5   0  339.78    4.38
   3   5   0  344.96    6.15
  -3   5   0  329.35    7.42
   3  -5   0  300.43    6.70
  -3  -5  -1 2720.89   17.78
   3   5   1 2657.24   19.42
  -3   5  -1 2606.12    9.77
   3  -5   1 2663.97   18.82
   3   5   1 2643.52   14.48
  -3   5  -1 2723.61   19.77
   3   5   2   97.88    5.13
  -3   5  -2   99.27    4.75
   3  -5   2  102.53    5.38
   3   5   2  100.96    3.11
  -3   5  -2   97.82    1.98
  -3  -5  -2  100.99    4.76
   3   5   3 1789.52   16.29
   3   5   3 1715.06   17.17
  -3   5  -3 1821.51   15.93
   3  -5   3 1767.90   17.57
   3   5   3 1769.44   10.03
   3  -5   4  559.89    6.07
   3   5   4  551.85   10.33
   3   5   4  562.06   10.70
   3   5   4  579.16    5.40
   3  -5   4  561.65   11.12
  -3   5  -4  553.02    9.28
  -3   5  -5 2339.41   18.41
   3  -5   5 2376.55   14.69
   3   5   5 2363.84   21.55
   3  -5   5 2428.20   22.71
   3   5   6  215.06    8.39
   3   5   6  200.02    7.82
  -3   5  -6  205.98    6.33
   3  -5   6  232.76    9.21
   3  -5   6  217.70    5.84
   3   5   7  483.74   12.15
   3  -5   7  450.15    8.72
   3   5   7  474.80   11.32
   3  -5   7  486.60   12.60
  -3   5  -7  468.72    8.85
   3   5   8  233.58    9.97
   3  -5   8  226.58   10.11
   3   5   8  252.69    9.31
   3  -5   8  238.33    7.53
  -3   5  -8  234.61    6.87
   3   5   9  466.11   13.44
   3  -5   9  469.88   10.71
   3   5   9  473.16   12.22
  -3   5  -9  472.62    9.33
   3  -5   9  455.14   13.15
   3   5  10   13.32    5.80
   3  -5  10    7.38    4.75
   3  -5  10   10.11    6.92
   3   5  11  442.82   14.62
   3  -5  11  476.63   12.38
   3   5  11  484.69   13.24
   3   5  12  183.35    9.60
   3   5  12  211.23   12.00
   3  -5  12  211.90    9.84
   3  -5  12  179.83   10.66
   3   5  13   37.96    8.88
   3  -5  13   23.16    6.41
   3   5  14   66.99   10.33
   3  -5  14   73.17    9.32
   3   5  15  135.66   12.24
   3  -5  15  138.61   10.47
   3   5  16   24.45    9.92
  -3  -6  16    4.17    9.10
  -3   6  16   14.43    9.96
  -3   6  15  257.67   14.52
  -3  -6  15  234.69   13.97
  -3   6  14    1.66    9.04
   3   6 -14    8.08    7.13
  -3  -6  14    2.69    8.37
   3   6 -13   91.21    9.03
  -3  -6  13   90.06   10.14
  -3   6  13   96.48   10.61
  -3  -6  12   -0.44    7.91
  -3   6  12   -6.13    8.36
   3  -6 -12    8.47    6.81
   3   6 -12    6.15    7.16
  -3   6  11  248.23   11.92
  -3  -6  11  261.35   11.50
   3   6 -11  234.09   11.03
   3  -6 -11  280.21   11.52
  -3  -6  10   -0.82    6.05
   3   6 -10    1.83    6.34
  -3   6  10    3.22    6.88
  -3  -6  10    5.94    4.38
   3  -6 -10    3.13    6.69
   3  -6  -9 1071.12   18.19
  -3   6   9 1046.73   18.77
   3   6  -9 1113.13   18.27
  -3  -6   9 1055.32   18.12
  -3   6   8    9.12    5.81
   3  -6  -8   -0.86    6.19
  -3  -6   8   -2.71    5.43
   3   6  -8    4.58    5.48
  -3  -6   8    6.42    4.14
  -3  -6   7 1139.59   16.48
  -3   6   7 1141.14   17.47
   3   6  -7 1138.87   16.99
   3  -6  -7 1157.74   17.49
  -3  -6   7 1150.16   13.99
   3  -6  -6    3.02    5.76
  -3  -6   6   -0.86    3.77
  -3  -6   6   -0.88    4.88
   3   6  -6   -1.67    5.17
  -3   6   6    6.75    4.61
  -3  -6   5   22.97    3.67
   3  -6  -5   30.28    5.79
  -3   6   5   35.52    4.55
  -3  -6   4  104.88    5.98
   3   6  -4  105.99    4.85
   3  -6  -4  104.81    3.05
   3   6  -4  104.10    5.82
  -3   6   4  117.34    5.59
   3  -6  -4  117.33    6.76
   3  -6  -3 2178.90   20.12
   3   6  -3 2083.72   16.72
   3   6  -3 2080.20   17.98
   3  -6  -3 2084.28   12.56
  -3  -6   3 2175.99   18.22
  -3   6   3 2179.27   16.81
  -3   6   2   47.24    3.22
   3   6  -2   48.32    3.73
  -3  -6   2   50.06    4.56
   3  -6  -2   46.22    3.37
   3  -6  -2   41.35    4.77
   3   6  -2   45.90    3.95
   3  -6  -1 3981.20   25.41
   3   6  -1 3907.96   22.94
  -3  -6   1 3942.90   22.04
   3  -6  -1 3999.29   20.83
   3   6  -1 4019.23   21.79
  -3   6   1 3962.27   17.48
   3   6   0   14.55    2.58
   3   6   0   10.19    3.27
  -3   6   0   13.46    3.76
  -3  -6   0   19.69    3.54
  -3   6   0   11.17    1.59
   3  -6   1  572.44    9.67
  -3  -6  -1  593.29    9.12
   3   6   1  612.84   10.14
  -3   6  -1  619.62   10.20
  -3   6  -1  590.98    4.04
   3   6   1  603.85    7.65
   3   6   2   -2.43    3.63
  -3   6  -2    6.24    3.52
   3   6   2    0.09    1.93
   3  -6   2   -0.94    4.14
   3  -6   3  138.91    6.65
  -3   6  -3  133.45    1.99
   3   6   3  134.67    6.22
  -3   6  -3  131.94    5.83
   3   6   3  145.07    5.76
  -3  -6  -3  142.48    6.10
   3   6   3  138.88    3.63
   3  -6   4    2.81    5.32
   3   6   4   -0.13    3.91
   3   6   4    1.31    4.16
  -3   6  -4    1.29    3.59
   3  -6   4    0.94    1.38
   3   6   4    1.70    1.67
   3  -6   5 2204.34   13.09
   3   6   5 2195.69   21.44
   3  -6   5 2212.71   22.27
   3   6   5 2257.47   10.48
  -3   6  -5 2276.95   19.48
   3  -6   6    9.59    6.25
   3   6   6   -7.08    5.17
   3  -6   6    2.07    2.76
   3   6   6    3.71    4.72
  -3   6  -6   -3.20    3.84
   3   6   7 2590.36   26.28
   3  -6   7 2475.30   18.72
   3   6   7 2459.89   24.37
  -3   6  -7 2493.35   20.99
   3  -6   7 2599.49   26.50
   3   6   8   27.44    5.64
   3   6   8   24.78    6.36
   3  -6   9   38.38    7.61
   3   6   9    3.76    6.63
   3   6   9   19.48    5.61
   3  -6   9   14.03    4.14
  -3   6  -9   25.78    4.26
   3   6  10    0.98    6.64
   3   6  10   -2.01    5.88
   3  -6  10    4.30    4.55
   3   6  11   35.89    8.51
   3  -6  11   40.60    5.93
   3   6  11   23.02    6.07
   3  -6  11   20.91    7.48
   3  -6  12    9.04    7.73
   3   6  13  714.65   19.91
   3   6  13  661.75   15.99
   3  -6  14    3.26    7.97
   3   6  15  176.79   13.17
   3  -6  15  197.45   11.99
   3   6  16    2.16    9.34
  -3   7  16   74.51   11.36
  -3   7  15   31.01    9.99
  -3  -7  15   22.89    8.98
  -3   7  14   68.87   10.44
  -3  -7  14   78.65   10.58
   3   7 -14   68.23    8.75
   3   7 -13  299.50   13.13
  -3  -7  13  299.85   14.12
  -3   7  13  334.06   14.70
   3   7 -12   -4.30    7.27
   3  -7 -12   12.99    7.13
  -3   7  12    1.01    8.20
  -3   7  11  588.09   16.70
  -3  -7  11  581.13   15.67
   3   7 -11  582.04   15.54
   3  -7 -11  620.44   15.58
   3  -7 -10   81.35    8.24
  -3  -7  10   79.46    6.22
   3   7 -10   90.64    8.37
  -3   7  10   86.77    8.67
  -3  -7  10   73.47    7.81
  -3   7   9  120.04    8.45
   3   7  -9   95.45    7.81
  -3  -7   9  111.19    6.48
   3  -7  -9  100.44    8.25
  -3  -7   9  104.19    7.85
   3  -7  -8  398.41   12.37
  -3  -7   8  433.06   11.77
  -3   7   8  430.27   12.45
   3   7  -8  401.16   11.90
  -3  -7   8  434.67    9.90
  -3  -7   7  239.19    8.90
   3   7  -7  246.56    9.41
  -3   7   7  234.03    9.07
   3  -7  -7  233.25    9.30
  -3  -7   7  235.19    7.62
   3  -7  -6    8.82    5.88
  -3  -7   6    6.54    5.14
  -3   7   6    3.54    4.98
  -3  -7   5 5231.78   28.77
  -3  -7   5 5199.63   31.33
  -3   7   5 5139.36   31.75
   3   7  -5 5207.76   32.16
   3  -7  -5 5056.44   33.36
   3  -7  -4   23.48    5.38
   3   7  -4   20.47    3.99
   3   7  -4   23.10    4.83
  -3  -7   4   18.23    4.96
  -3   7   4   18.89    3.90
   3  -7  -4   17.14    2.62
   3   7  -3 1086.78   12.87
  -3   7   3 1078.00   12.54
   3  -7  -3 1075.11   15.06
   3   7  -3 1089.16   13.49
  -3  -7   3 1045.18   13.49
   3  -7  -3 1048.26   10.04
  -3  -7   2 2593.37   19.35
   3  -7  -2 2517.52   21.87
   3   7  -2 2514.91   19.24
  -3   7   2 2475.28   16.78
   3   7  -2 2565.98   19.32
   3  -7  -2 2540.95   16.50
   3  -7  -1  136.63    5.24
   3   7  -1  129.76    5.51
  -3   7   1  132.38    6.20
   3  -7  -1  150.22    6.56
  -3  -7   1  133.33    5.31
  -3   7   1  123.80    3.85
   3   7  -1  133.94    5.16
   3   7   0  315.40    7.62
   3   7   0  303.24    6.39
  -3   7   0  323.74    8.47
  -3   7   0  300.31    4.15
  -3  -7   0  311.63    7.31
   3  -7   0  329.05    7.49
  -3  -7  -1 1226.93   13.35
   3   7   1 1197.66   14.25
   3  -7   1 1251.05   14.24
  -3   7  -1 1285.44   15.21
   3   7   1 1247.84   11.39
   3   7   2  362.88    8.73
   3  -7   2  358.20    8.91
   3   7   2  354.89    6.06
  -3  -7  -2  334.88    8.03
  -3   7  -2  372.36    8.69
   3   7   3 1525.12   16.14
  -3   7  -3 1638.42   17.24
   3   7   3 1498.96   17.19
   3   7   3 1623.62   12.00
   3  -7   3 1564.39   17.45
  -3  -7  -3 1635.04   17.11
   3   7   4  127.17    6.53
   3   7   4  133.46    3.87
  -3   7  -4  143.25    6.37
   3   7   4  137.06    6.85
  -3   7  -4  124.66    2.12
   3  -7   4  147.31    7.75
   3   7   5  231.59    8.45
   3  -7   5  227.43    4.10
   3   7   5  232.14    8.41
  -3   7  -5  222.67    7.58
   3  -7   5  233.54    9.33
   3   7   5  236.20    4.43
   3   7   6  741.59   14.47
   3  -7   6  702.21    8.58
  -3  -7  -6  705.11    6.14
  -3   7  -6  682.51   11.92
   3   7   6  722.12   13.70
   3  -7   6  732.30   14.58
   3  -7   7  369.28   11.86
   3   7   7  387.24   11.68
   3  -7   7  336.36    7.12
   3   7   7  365.30   10.59
   3   7   8   96.68    8.09
   3  -7   8   82.04    4.82
   3   7   8   90.27    7.27
  -3   7  -8   81.03    5.70
   3  -7   8  101.75    8.86
   3  -7   9  769.71   12.51
  -3   7  -9  745.86   13.23
   3   7   9  796.61   15.67
   3  -7   9  755.86   17.07
   3   7   9  752.56   17.05
   3  -7  10   -2.32    7.52
   3   7  10   -6.71    7.03
   3   7  10   -0.90    5.84
   3  -7  10    8.18    4.39
   3   7  11  540.60   16.37
   3   7  11  562.58   14.43
   3  -7  11  509.62   15.44
   3   7  12   93.85   10.16
   3   7  12   96.81    8.04
   3  -7  12   85.55    9.94
   3   7  13   34.04    7.02
   3   7  14  141.98   12.09
   3  -7  14  128.10   11.28
   3   7  15   74.56   10.95
   3   7  16   31.33    9.84
  -3  -8  16   -5.92    8.97
  -3   8  15   48.41   10.72
  -3  -8  15   10.24    8.50
  -3   8  14  210.32   13.53
   3   8 -14  208.72   12.18
  -3  -8  14  223.39   13.62
   3   8 -13   17.05    7.72
  -3   8  13   24.42    9.09
  -3   8  12  385.61   15.01
   3   8 -12  368.79   14.19
  -3  -8  12  410.95   14.82
   3  -8 -12  404.16   13.40
  -3  -8  11   53.79    8.23
  -3   8  11   61.98    8.70
   3   8 -11   50.49    7.75
   3  -8 -11   74.90    8.56
  -3   8  10  299.06   12.27
  -3  -8  10  271.20   11.07
   3  -8 -10  267.68   11.15
  -3  -8  10  288.75    9.92
   3   8 -10  266.26   11.53
  -3  -8   9  305.21   10.86
  -3  -8   9  276.96    9.40
   3   8  -9  302.91   11.52
  -3   8   9  281.13   11.27
   3  -8  -9  283.19   11.27
  -3   8   8  167.50    8.85
  -3  -8   8  178.96    8.69
   3   8  -8  169.57    9.01
  -3  -8   8  176.68    7.61
   3  -8  -8  162.06    9.27
   3   8  -7  365.27   11.10
  -3  -8   7  383.65   10.95
   3  -8  -7  363.26   11.33
  -3   8   7  351.34   10.88
  -3  -8   7  385.48    9.72
  -3  -8   6  973.18   15.21
   3   8  -6  930.61   15.65
  -3   8   6  988.66   15.51
  -3  -8   6  948.42   13.97
   3  -8  -6  978.41   16.21
  -3  -8   5   37.48    5.88
  -3   8   5   26.80    4.67
   3  -8  -4 1853.02   20.49
  -3  -8   4 1831.73   17.78
   3   8  -4 1839.98   17.80
  -3  -8   4 1854.40   19.00
  -3   8   4 1813.80   17.92
   3   8  -4 1823.78   18.88
   3  -8  -4 1810.39   12.94
   3  -8  -3   15.79    5.16
   3   8  -3   10.91    3.93
  -3  -8   3    3.04    4.75
   3  -8  -3    9.32    3.16
   3   8  -3   14.91    4.22
   3   8  -2  302.80    7.75
  -3  -8   2  282.92    7.76
   3  -8  -2  325.68    9.28
   3   8  -2  295.35    7.74
  -3   8   2  289.43    6.25
  -3   8   2  279.86    8.69
   3  -8  -2  290.55    6.66
   3   8  -1 1134.35   13.97
   3   8  -1 1155.64   13.02
  -3  -8   1 1132.14   13.18
  -3   8   1 1177.17   15.64
  -3   8   1 1146.46    9.87
   3  -8  -1 1187.26   12.84
   3   8   0 1468.24   13.78
   3   8   0 1474.05   16.05
  -3   8   0 1474.15    8.10
  -3  -8   0 1453.43   14.81
  -3   8   0 1530.16   17.58
   3  -8   0 1522.29   15.44
  -3  -8  -1  213.76    6.70
   3   8   1  223.19    7.33
  -3   8  -1  232.38    7.86
   3   8   1  205.94    5.48
   3   8   2 1449.29   16.74
   3   8   2 1450.32   12.66
  -3   8  -2 1493.72   17.22
   3  -8   2 1479.78   16.85
   3   8   3    7.69    2.58
   3   8   3    3.45    4.51
  -3   8  -3   -2.84    4.71
   3  -8   3    4.90    5.47
  -3  -8  -3    6.03    4.63
   3  -8   4 3274.32   26.81
   3   8   4 3408.24   26.49
   3   8   4 3276.77   26.62
  -3   8  -4 3431.51   26.21
   3   8   4 3432.96   18.28
   3   8   5 1255.34   17.38
  -3   8  -5 1203.39   16.19
   3   8   5 1193.82   17.16
   3   8   5 1220.48   10.59
   3  -8   5 1157.65    7.06
   3  -8   5 1171.37   17.58
   3   8   6    8.21    5.68
   3  -8   6    5.18    2.06
   3   8   6    5.68    5.06
   3  -8   6    6.51    6.81
  -3   8  -6    4.18    4.60
   3   8   7  509.15   13.14
   3  -8   7  494.04    7.95
   3   8   7  504.57   12.66
  -3   8  -7  490.75   11.18
   3  -8   7  534.06   13.97
   3   8   8  469.03   13.58
   3   8   8  444.70   12.42
   3  -8   8  441.61   13.49
   3  -8   9   41.68    8.43
   3   8   9   32.07    6.43
   3   8   9   30.21    7.34
  -3   8  -9   42.57    5.50
   3   8  10  678.98   17.12
   3   8  10  711.52   16.07
   3  -8  10  666.25   17.32
   3   8  11   12.03    8.19
   3   8  11    1.37    6.38
   3  -8  11    6.87    8.42
   3   8  12  204.56   10.40
   3  -8  12  207.99   12.32
   3   8  13  124.58   11.57
   3   8  13  117.55    8.85
   3  -8  13  113.96   10.93
   3   8  14    0.71    9.04
   3  -8  14   -7.49    8.57
   3  -8  16  112.17   10.46
  -3  -9  16  123.02   12.05
  -3   9  15   -0.04    9.74
  -3  -9  15    9.57    8.74
  -3   9  14  136.09   12.36
  -3  -9  14  148.50   11.77
   3   9 -14  164.67   11.78
  -3   9  13    6.13    8.98
   3   9 -13    1.76    7.66
  -3  -9  13   -7.09    8.34
  -3  -9  12    5.46    7.28
  -3   9  12   19.96    8.34
   3   9 -12   26.32    7.84
  -3  -9  11    7.72    6.72
  -3   9  11   13.40    7.68
   3   9 -11   -2.12    7.37
  -3  -9  11    5.25    5.84
  -3   9  10  989.69   19.78
   3   9 -10  965.29   19.65
  -3  -9  10  980.02   17.12
  -3  -9  10  961.06   19.11
   3   9  -9   10.73    6.89
  -3  -9   9    1.21    6.05
  -3   9   9    6.03    6.58
  -3  -9   9    9.32    5.54
   3  -9  -9    2.07    6.61
  -3  -9   8 1083.03   17.73
   3   9  -8 1115.63   18.87
  -3  -9   8 1156.06   17.03
  -3   9   8 1157.63   18.94
   3  -9  -8 1103.07   18.57
  -3  -9   7   39.42    6.34
   3   9  -7   58.70    6.97
  -3  -9   7   51.60    5.70
   3  -9  -7   51.47    7.01
  -3  -9   6  766.83   13.35
   3  -9  -6  711.96   14.69
  -3  -9   6  767.48   13.95
   3   9  -6  765.54   14.75
  -3   9   6  738.41   13.98
  -3  -9   5    7.45    4.74
   3   9  -5   -4.24    5.72
  -3   9   5   10.84    4.37
  -3  -9   5    7.99    5.10
   3  -9  -5    2.36    2.79
   3  -9  -4  299.62    6.42
   3  -9  -4  286.33    9.92
   3   9  -4  257.16    7.99
  -3   9   4  287.44    8.04
  -3  -9   4  285.27    9.06
   3   9  -4  269.31    8.81
  -3  -9   4  272.00    8.23
   3   9  -3  269.67    8.10
  -3   9   3  284.37    7.10
   3   9  -3  279.08    8.33
   3  -9  -3  253.09    9.19
  -3  -9   3  292.92    8.53
   3  -9  -3  293.29    6.74
  -3  -9   2 2478.93   20.45
   3  -9  -2 2468.76   23.51
   3   9  -2 2524.92   21.53
   3   9  -2 2525.19   20.87
  -3   9   2 2477.91   16.88
  -3   9   2 2574.39   23.74
   3  -9  -2 2593.90   18.77
   3   9  -1  176.05    6.30
  -3  -9   1  177.12    6.57
   3   9  -1  179.93    7.04
   3  -9  -1  160.27    6.36
  -3   9   1  186.94    8.02
  -3   9   1  164.60    4.18
   3   9   0 1209.61   15.39
  -3   9   0 1237.54    6.80
  -3  -9   0 1245.45   14.48
   3   9   0 1246.28   13.49
  -3  -9  -1  121.27    6.05
   3   9   1  111.12    6.08
  -3   9  -1  124.05    6.69
   3   9   1  117.36    5.01
   3  -9   1  118.97    6.66
   3   9   2  268.84    8.43
  -3   9  -2  303.76    9.15
   3  -9   2  312.11    9.53
  -3  -9  -2  256.04    8.00
   3   9   2  261.55    6.29
  -3   9  -3  455.64   10.78
   3   9   3  439.74   10.55
  -3  -9  -3  418.01   10.14
   3   9   3  420.88    7.58
   3  -9   3  447.76   11.23
   3   9   4 1225.37   16.81
   3   9   4 1241.07   17.19
  -3   9  -4 1213.81   16.98
   3   9   4 1238.03   12.17
   3  -9   4 1235.61   17.76
  -3   9  -5   -0.97    4.78
   3   9   5   12.17    5.58
   3   9   5    1.13    2.56
   3  -9   5   -0.26    7.02
   3  -9   6 1402.94   20.38
   3   9   6 1439.10   20.24
   3   9   6 1314.80   18.83
   3   9   6 1311.11   11.29
  -3   9  -6 1317.68   17.97
   3   9   7   98.41    8.29
   3   9   7  109.72    7.78
   3  -9   7  111.24    9.09
  -3   9  -7   99.15    6.77
   3   9   8  711.23   16.45
   3   9   8  714.78   15.35
  -3   9  -8  762.73   14.52
   3  -9   8  737.59   16.98
  -3   9  -9    7.53    5.28
   3   9   9   -2.05    7.22
   3   9   9   -1.14    5.97
   3  -9   9   -8.36    8.49
   3   9  10   12.86    7.92
   3   9  10   14.38    6.07
   3   9  11    0.78    8.02
   3  -9  11   12.94    8.76
   3   9  12  320.14   12.05
   3  -9  12  305.26   14.12
   3   9  13   -6.71    9.22
   3  -9  13    1.53    8.87
   3   9  14  325.38   15.66
   3  -9  14  311.98   14.72
   3   9  15    3.86    9.78
   3  -9  15    8.38    8.73
   3  -9  16   62.11    9.66
  -3 -10  15   74.60   10.15
  -3  10  15   76.44   11.30
  -3  10  14  140.25   12.22
   3  10 -14  173.53   12.29
  -3 -10  14  164.52   12.29
  -3  10  13    2.72    8.82
   3  10 -13   10.90    7.96
  -3 -10  13   -5.51    7.98
  -3  10  12  317.27   14.27
  -3 -10  12  309.35   13.53
   3  10 -12  316.19   14.02
  -3 -10  11   -0.39    7.65
  -3  10  11   16.83    8.05
  -3 -10  10  390.68   13.33
  -3  10  10  434.39   14.42
   3  10 -10  426.65   14.48
  -3 -10  10  432.64   12.69
  -3 -10   9  489.92   13.43
   3 -10  -9  467.83   13.88
  -3  10   9  513.55   14.71
  -3 -10   9  503.54   12.97
   3  10  -9  517.36   14.88
   3  10  -8  237.72   10.85
  -3 -10   8  194.66    9.05
  -3  10   8  224.30   10.03
  -3 -10   8  210.05    9.32
   3 -10  -8  214.34   10.08
  -3 -10   7  252.25    9.51
   3 -10  -7  267.38   10.77
   3  10  -7  275.98   10.87
  -3 -10   7  257.75    9.55
  -3  10   7  247.43    9.72
   3 -10  -6  418.52   11.87
  -3  10   6  426.25   11.01
   3  10  -6  385.34   11.72
  -3 -10   6  410.52   10.96
   3 -10  -5   18.54    6.18
   3  10  -5   20.20    5.72
   3 -10  -4 1519.04   20.00
   3  10  -4 1554.31   18.17
   3  10  -4 1543.32   18.75
  -3 -10   4 1554.53   18.41
  -3  10   4 1537.23   16.88
  -3 -10   4 1561.64   18.26
   3 -10  -4 1531.14   14.29
   3  10  -3  370.52    9.61
  -3  10   3  356.38    7.91
   3  10  -3  386.16    9.80
   3 -10  -3  380.22   10.85
  -3 -10   3  399.05    9.74
   3 -10  -3  391.68    8.17
  -3 -10   2  120.22    6.57
  -3  10   2  131.52    4.65
  -3  10   2  136.80    7.43
   3  10  -2  117.42    6.42
   3  10  -2  136.71    6.92
   3 -10  -2  134.65    5.91
   3  10  -1  774.10   13.09
  -3 -10   1  783.32   12.26
  -3  10   1  819.64   14.45
   3 -10  -1  818.24   12.23
   3  10  -1  826.23   12.36
  -3  10   1  811.72    8.11
   3  10   0  991.07   14.59
  -3 -10   0 1046.88   13.72
   3  10   0 1017.46   12.92
  -3  10   0 1086.61   16.36
   3 -10   0 1042.38   14.25
  -3 -10  -1  586.90   10.91
   3  10   1  555.21   11.53
   3  10   1  592.99    9.83
   3 -10   1  583.14   11.74
   3  10   2 1648.11   19.11
  -3 -10  -2 1656.37   18.12
   3  10   2 1747.44   16.02
   3 -10   2 1651.68   19.25
  -3  10  -2 1761.19   20.53
   3  10   3    7.05    4.90
  -3  10  -3   13.76    5.32
  -3 -10  -3    6.09    5.12
   3 -10   3    8.24    6.03
  -3 -10  -4  909.81   15.47
   3  10   4  876.09   14.60
   3  10   4  832.34   14.83
   3  10   4  862.96   11.01
  -3  10  -4  880.58   15.42
   3 -10   4  863.09   15.84
   3  10   5  141.83    8.06
   3  10   5  129.91    7.50
   3  10   5  116.62    4.73
  -3  10  -5  112.82    7.28
   3 -10   5  140.38    9.25
   3  10   6   44.95    6.76
  -3  10  -6   37.69    5.93
   3  10   6   53.16    6.61
   3 -10   6   44.09    7.78
   3  10   6   51.79    3.51
   3  10   7  341.29   12.06
   3  10   7  321.64   10.87
  -3  10  -7  307.37   10.43
   3 -10   7  322.56   12.35
   3  10   8  762.84   17.50
   3  10   8  771.16   16.13
  -3  10  -8  706.37   14.82
   3 -10   8  757.81   17.50
   3  10   9    1.55    7.29
   3  10   9    4.84    6.29
   3 -10   9    4.73    8.05
   3  10  10  342.48   13.96
   3  10  10  369.55   12.46
  -3  10 -10  381.08   11.76
   3 -10  10  361.47   14.38
   3 -10  11   17.89    9.11
   3  10  12  312.90   14.85
   3  10  12  311.27   11.96
   3 -10  12  285.78   14.76
   3  10  13  179.95   13.29
   3 -10  13  156.10   12.11
   3  10  14   11.02   10.18
   3 -10  14    3.87    9.15
   3  10  15   29.64   10.04
   3 -10  15   14.01    8.97
  -3  11  15    5.83    9.92
  -3  11  14   12.54    9.30
   3  11 -14   -6.33    8.63
  -3 -11  14    7.88    8.54
   3  11 -13  379.92   15.80
  -3  11  13  393.61   16.26
  -3 -11  13  396.29   15.57
  -3 -11  12  -14.77    7.73
  -3  11  12   -5.20    8.56
   3  11 -12   -4.81    8.44
   3  11 -11  247.67   12.78
  -3  11  11  256.64   12.81
  -3 -11  11  230.05   11.02
  -3 -11  11  244.60   11.92
   3 -11 -11  241.28   11.91
  -3  11  10  291.17   12.81
   3  11 -10  275.54   12.78
  -3 -11  10  288.49   11.62
   3 -11 -10  275.60   12.26
  -3 -11  10  280.71   11.64
   3  11  -9   43.76    8.36
  -3  11   9   43.00    7.38
  -3 -11   9   45.31    7.03
  -3 -11   9   45.76    7.37
   3 -11  -9   52.39    8.05
  -3 -11   8  194.16    9.55
  -3 -11   8  198.14    9.20
  -3  11   8  206.54    9.79
   3  11  -8  200.64   10.79
   3 -11  -8  189.10    9.75
  -3 -11   7  627.76   14.01
  -3  11   7  658.79   14.52
  -3 -11   7  645.64   14.18
   3  11  -7  659.15   15.29
   3 -11  -7  630.04   15.07
   3 -11  -6  203.73    9.58
  -3 -11   6  222.00    9.20
  -3  11   6  221.22    8.66
   3  11  -6  214.72    9.82
  -3 -11   6  212.99    8.96
   3 -11  -5 1069.24   17.81
  -3  11   5 1069.22   15.68
  -3 -11   5 1093.70   16.58
   3  11  -5 1062.77   17.28
   3 -11  -5 1092.20   12.56
  -3 -11   5 1145.62   17.42
  -3 -11   4    3.51    5.49
   3 -11  -4    4.33    5.72
  -3 -11   4    5.08    5.60
   3 -11  -4   -3.03    3.86
   3  11  -4   -0.02    4.89
  -3  11   4    1.39    3.76
   3  11  -4    4.56    5.51
   3  11  -3  847.95   14.55
   3 -11  -3  840.92   15.68
  -3  11   3  852.50   15.62
  -3  11   3  846.60   11.68
   3  11  -3  823.18   14.14
  -3 -11   3  864.88   14.02
   3 -11  -3  855.90   12.14
   3  11  -2  450.06   10.90
  -3  11   2  447.31   11.95
  -3  11   2  473.66    7.85
   3  11  -2  455.68   10.40
  -3 -11   2  454.32   10.39
   3 -11  -2  436.20    9.57
   3  11  -1   36.26    4.94
   3  11  -1   25.85    5.46
  -3 -11   1   27.12    5.10
   3 -11  -1   19.96    5.01
  -3  11   1   34.75    6.37
  -3  11   1   33.61    2.50
   3  11   0  253.27    8.95
  -3  11   0  260.56   10.05
  -3 -11   0  274.52    8.54
   3  11   0  269.37    7.79
   3 -11   0  267.80    8.68
  -3 -11  -1  898.65   13.55
  -3  11  -1  989.45   16.22
   3  11   1  874.08   14.66
   3  11   1  962.71   12.95
   3 -11   1  931.71   14.89
   3  11   2   10.28    3.70
  -3 -11  -2    4.19    4.96
   3 -11   2   14.25    5.97
  -3 -11  -3 2217.64   22.51
   3  11   3 2191.99   23.24
   3 -11   3 2351.96   24.70
  -3  11  -3 2273.00   24.37
   3  11   3 2284.88   18.79
   3  11   4  160.49    7.90
   3  11   4  180.49    6.07
   3  11   4  194.39    8.72
  -3  11  -4  180.57    8.92
  -3 -11  -4  161.45    8.29
   3 -11   4  166.32    9.31
   3  11   5   30.89    6.39
   3  11   5   34.43    6.20
   3 -11   5   35.51    7.67
   3  11   5   33.68    3.90
   3  11   6  396.90   11.63
   3  11   6  403.30    7.80
   3 -11   6  403.40   13.18
  -3  11  -6  408.64   11.87
   3  11   6  432.23   12.59
   3  11   7   30.01    6.33
   3  11   7   23.57    6.88
   3 -11   7   26.08    7.98
  -3  11  -8   90.52    7.50
   3  11   8  105.54    9.05
   3  11   8  106.11    8.11
   3 -11   8  117.05   10.36
   3  11   9  935.58   20.37
   3  11   9  942.80   18.35
  -3  11  -9  940.43   18.02
   3 -11   9  962.52   20.63
   3  11  10    9.45    8.34
   3  11  10    8.98    6.56
  -3  11 -10    5.99    5.75
   3  11  11  429.12   16.07
   3  11  11  430.08   13.52
   3 -11  11  461.63   16.94
   3  11  12   21.33    9.48
   3 -11  13   16.85    9.58
   3 -11  14   83.94   11.87
   3  11  14   83.84   11.62
   3  11  15   57.87   11.72
   3 -11  15   17.40    9.29
  -3  12  14    1.45    9.60
   3  12 -14    6.22    8.47
  -3 -12  13   14.32    8.27
  -3  12  13  -11.39    9.01
   3  12 -13    7.86    8.89
   3  12 -12   13.46    8.68
  -3  12  12   -0.03    8.45
  -3 -12  12    5.80    7.36
  -3 -12  11  122.99    9.95
  -3  12  11  122.52   10.33
   3  12 -11  148.57   11.34
  -3 -12  11  154.15   10.60
   3 -12 -11  136.20   10.40
   3 -12 -10   -0.71    7.53
  -3  12  10    3.67    7.43
  -3 -12  10    4.53    6.75
   3  12 -10    1.54    7.52
  -3 -12  10   -2.16    7.34
  -3 -12   9 1338.70   21.68
  -3 -12   9 1324.62   21.78
  -3  12   9 1385.89   23.06
   3 -12  -9 1263.87   22.07
   3  12  -9 1291.88   23.22
  -3 -12   8   -0.41    6.92
   3 -12  -8    3.54    6.71
  -3 -12   8    4.64    6.09
  -3  12   8    1.78    6.27
   3  12  -8   -0.66    7.23
   3  12  -7  634.26   15.71
  -3 -12   7  658.96   14.32
  -3 -12   7  627.94   14.68
  -3  12   7  659.62   14.65
   3 -12  -7  612.24   15.09
   3 -12  -6   93.19    8.39
  -3 -12   6   83.51    6.85
  -3  12   6   94.64    6.89
   3  12  -6   78.42    7.81
  -3 -12   6   95.36    7.82
  -3 -12   5   12.31    6.12
   3  12  -5    6.98    6.25
  -3  12   5    5.79    4.44
   3 -12  -5   -2.49    5.99
  -3 -12   5    2.78    5.26
   3 -12  -5    3.45    3.74
  -3 -12   4   10.99    6.07
  -3 -12   4   15.94    5.54
   3 -12  -4   11.54    5.88
   3  12  -4   16.99    5.83
  -3 -12   3  531.21   11.67
   3  12  -3  596.05   13.10
  -3  12   3  584.64   10.04
   3  12  -3  550.73   12.42
  -3  12   3  575.81   13.71
   3 -12  -3  541.63   13.59
   3 -12  -3  559.73   10.78
   3  12  -2  181.61    8.37
  -3  12   2  178.25    5.17
  -3 -12   2  165.66    7.38
   3 -12  -2  173.70    7.29
  -3  12   2  177.98    9.34
   3  12  -2  182.09    7.91
  -3  12   1 2357.88   13.25
   3 -12  -1 2464.85   22.49
  -3 -12   1 2382.63   21.75
  -3  12   1 2516.94   26.08
   3  12  -1 2321.62   23.94
   3  12  -1 2416.76   22.51
  -3  12   0   11.09    6.25
   3  12   0    6.58    5.51
  -3 -12   0    9.75    5.12
   3 -12   0   10.81    5.18
   3  12   1  423.47    9.63
   3  12   1  422.25   11.22
  -3  12  -1  414.60   11.89
   3 -12   1  438.78   11.32
  -3 -12  -1  428.89   10.52
  -3  12  -2    5.25    6.00
   3  12   2    1.45    5.43
  -3 -12  -2    8.09    4.99
   3  12   2    3.05    3.84
   3  12   3   52.62    6.42
   3  12   3   37.27    4.15
  -3  12  -3   57.31    6.93
   3 -12   3   63.10    7.90
  -3 -12  -3   47.16    6.28
   3 -12   4   10.07    7.12
  -3 -12  -4    7.84    6.13
   3  12   4    6.44    3.62
   3  12   5 1393.50   20.51
   3  12   5 1357.12   20.17
   3  12   5 1389.18   15.25
  -3  12  -5 1383.44   20.87
  -3 -12  -5 1394.33   20.83
   3 -12   5 1453.47   22.04
   3 -12   6    4.10    7.98
   3  12   6   11.04    6.60
   3  12   6    7.69    5.85
  -3  12  -6    9.93    6.06
   3  12   7  875.25   18.26
   3  12   7  874.78   17.37
  -3  12  -7  799.96   16.92
   3 -12   7  796.98   18.28
   3  12   8    7.03    6.50
   3 -12   8   -5.04    8.33
   3  12   9  202.62   11.68
   3  12   9  205.13   10.32
   3 -12   9  181.21   12.12
  -3  12  -9  191.98   10.13
  -3  12 -10   -7.44    6.42
   3  12  10    9.66    7.88
   3  12  10   -3.60    6.64
   3 -12  10   -3.98    9.13
   3  12  11  122.31   11.72
   3  12  11  122.47    9.17
   3 -12  11  103.65   11.75
   3 -12  12   -4.87    9.99
   3  12  13  266.73   15.08
   3 -12  13  234.49   14.99
   3  12  14    9.72   10.29
   3 -12  14    2.90    9.50
   3 -12  15  133.98   12.64
   3  13 -14   20.28    9.27
  -3  13  13  249.06   14.24
   3  13 -13  197.18   13.81
   3  13 -12    4.11    8.82
  -3  13  12    6.83    7.97
  -3 -13  11  186.39   11.15
  -3  13  11  203.00   12.48
   3  13 -11  169.86   12.18
  -3 -13  11  155.36   11.01
   3 -13 -11  168.91   11.14
  -3 -13  10  196.57   10.76
  -3 -13  10  211.04   11.59
  -3  13  10  212.01   11.61
   3 -13 -10  221.39   11.67
   3  13 -10  191.30   12.33
   3  13  -9   58.77    9.18
  -3 -13   9   70.84    8.23
  -3  13   9   85.37    8.90
  -3 -13   9   73.47    8.90
   3 -13  -9   86.71    9.10
  -3 -13   8  144.23    9.97
  -3 -13   8  136.01    8.88
  -3  13   8  142.40    9.23
   3  13  -8  149.96   10.59
   3 -13  -8  132.44    9.27
   3 -13  -7  502.15   14.41
  -3 -13   7  519.36   13.40
  -3  13   7  492.96   13.20
   3  13  -7  485.43   14.66
  -3 -13   7  502.79   13.97
   3 -13  -6  343.35   12.05
  -3 -13   6  332.41   10.84
  -3  13   6  347.47   10.86
   3  13  -6  347.16   12.36
  -3 -13   6  347.04   11.98
   3 -13  -5  716.31   16.20
  -3 -13   5  745.46   15.91
  -3  13   5  741.66   13.63
   3  13  -5  749.60   16.06
  -3 -13   5  756.93   14.67
   3 -13  -5  748.73   12.11
  -3 -13   4  265.69   10.58
   3 -13  -4  264.95   10.77
  -3  13   4  286.83    8.18
   3 -13  -4  290.40    8.46
  -3 -13   4  276.67    9.77
   3  13  -4  297.13   10.57
  -3 -13   3 1015.69   17.38
   3 -13  -3  995.57   17.95
   3  13  -3  997.82   17.08
  -3  13   3  963.60   12.59
  -3  13   3  973.54   17.62
   3  13  -3  992.53   16.66
   3 -13  -3 1012.45   14.79
  -3 -13   3 1001.48   15.67
  -3 -13   2   41.46    5.80
  -3  13   2   34.72    3.13
   3  13  -2   34.46    6.16
  -3  13   2   34.67    7.16
   3 -13  -2   37.38    5.32
   3  13  -2   41.58    6.06
   3  13  -1    5.99    4.83
   3  13  -1   10.08    5.83
  -3  13   1    9.80    6.62
  -3 -13   1   14.32    5.01
   3  13   0  831.66   15.56
  -3  13   0  882.85   16.68
   3  13   0  844.70   14.16
   3 -13   0  803.13   14.64
  -3 -13   0  817.88   13.83
   3  13   1  276.88   10.11
  -3  13  -1  300.81   11.03
   3 -13   1  312.36   10.44
   3  13   1  326.61    9.07
  -3 -13  -1  290.98    9.11
   3  13   2   -0.86    6.18
  -3 -13  -2    3.88    5.03
  -3  13  -2    6.89    6.09
   3  13   2   10.07    4.01
   3 -13   2   -1.24    6.25
  -3  13  -3  900.17   17.27
   3  13   3  902.16   13.47
   3  13   3  875.45   16.42
  -3 -13  -3  862.02   15.61
   3 -13   3  887.72   16.95
   3  13   4  363.61   11.66
   3  13   4  366.70    9.12
  -3  13  -4  369.06   12.18
  -3 -13  -4  369.60   11.45
   3 -13   4  385.49   13.10
   3  13   5   40.74    7.01
   3  13   5   30.57    6.73
   3 -13   5   50.08    8.32
   3  13   5   27.64    4.28
  -3 -13  -5   34.91    7.28
   3 -13   6  215.21   11.79
   3  13   6  238.12   10.85
   3  13   6  212.43    9.84
  -3  13  -6  217.71   10.64
   3  13   7  130.48    9.58
   3  13   7  130.95    8.60
  -3  13  -7  143.68    9.42
   3 -13   7  128.78   10.54
   3 -13   8  316.56   13.90
   3  13   8  356.88   13.70
   3  13   8  379.27   12.75
  -3  13  -8  331.59   12.54
   3  13   9  621.31   17.90
   3  13   9  610.69   15.99
  -3  13  -9  632.50   16.50
   3 -13   9  624.57   18.48
   3  13  10    1.98    8.69
  -3  13 -10    2.05    6.70
   3 -13  10    0.61    9.27
   3  13  11  310.70   15.01
   3  13  11  326.81   12.48
   3 -13  11  318.87   15.94
   3  13  12   60.10   10.96
   3 -13  12   52.15   11.35
   3  13  13   22.28   10.30
   3 -13  13   16.48    9.84
   3  13  14   20.34   10.61
   3 -13  14   29.56   10.67
  -3  14  14  112.26   11.96
   3  14 -14   79.33   11.15
  -3  14  13   -0.39    9.15
   3  14 -13    4.20    9.36
  -3  14  12  265.22   14.23
   3  14 -12  255.14   14.92
   3  14 -11   21.24    9.13
  -3 -14  11   24.51    8.65
  -3  14  11   23.98    8.31
  -3  14  10  114.38    9.88
   3  14 -10   99.41   11.02
   3 -14 -10  101.19    9.91
  -3 -14  10  102.71   10.33
  -3 -14  10  106.89    9.27
  -3 -14   9  155.46    9.58
  -3  14   9  145.49    9.78
   3  14  -9  131.03   11.11
  -3 -14   9  135.69   10.68
   3 -14  -9  110.52    9.97
  -3 -14   8   50.25    7.37
   3 -14  -8   54.31    8.42
  -3 -14   8   64.42    9.17
  -3  14   8   61.89    7.95
   3  14  -8   50.38    8.59
   3 -14  -7  113.44    9.34
  -3 -14   7  118.61    8.42
  -3  14   7  122.83    8.25
   3  14  -7  137.52   10.05
  -3 -14   7  130.73    9.88
  -3  14   6 1074.43   17.45
  -3 -14   6 1033.29   17.63
   3 -14  -6  983.75   19.21
   3  14  -6  980.63   19.68
  -3 -14   6 1052.19   19.56
  -3  14   5   21.31    4.94
  -3 -14   5   15.88    6.08
  -3 -14   4  906.05   17.57
   3 -14  -4  875.27   17.83
  -3  14   4  906.89   13.76
  -3 -14   4  904.98   15.83
   3  14  -4  924.65   17.71
   3 -14  -4  900.30   14.43
  -3 -14   3  332.02   11.72
   3  14  -3  348.25   11.65
  -3  14   3  317.15    7.67
   3  14  -3  341.20   11.35
  -3  14   3  378.40   12.39
  -3 -14   3  352.77   10.58
   3 -14  -3  367.37   10.11
   3 -14  -3  347.96   12.12
   3  14  -2  230.28   10.08
   3 -14  -2  236.27    9.09
  -3  14   2  238.14   10.82
   3  14  -2  242.40    9.78
  -3 -14   2  206.91    8.67
   3  14  -1  106.51    7.84
  -3 -14   1   99.88    6.88
  -3  14   1  122.55    9.01
   3  14  -1   98.89    7.22
   3 -14  -1   96.20    7.15
   3  14   0  117.09    7.23
   3  14   0  100.99    8.15
   3 -14   0  114.01    7.70
  -3 -14   0  112.96    7.07
  -3  14   0  121.93    8.61
  -3  14  -1  354.30   12.08
  -3 -14  -1  359.62   10.37
   3  14   1  340.98    9.76
   3 -14   1  363.58   11.69
   3  14   1  336.49   11.34
   3  14   2 1247.01   19.78
  -3 -14  -2 1192.94   17.68
   3  14   2 1252.74   16.78
   3 -14   2 1203.34   19.38
  -3  14  -2 1240.01   20.55
   3  14   3  163.86    9.11
  -3 -14  -3  152.98    8.27
  -3  14  -3  151.95    9.46
   3  14   3  164.46    7.14
   3 -14   3  173.52   10.12
   3  14   4  213.86   10.09
  -3  14  -4  207.43   10.28
   3  14   4  248.46    8.13
   3 -14   4  243.14   11.63
  -3 -14  -4  240.36   10.03
   3  14   5  166.18    9.31
  -3  14  -5  167.66    9.96
  -3 -14  -5  177.58   10.05
   3  14   5  172.45    6.92
   3 -14   5  180.12   11.17
  -3 -14  -6   19.67    7.10
   3  14   6   18.95    6.52
  -3  14  -6   28.44    7.21
   3  14   7  236.76   11.60
   3  14   7  235.18   10.76
  -3  14  -7  207.99   10.92
   3 -14   7  215.34   12.64
  -3  14  -8  436.11   14.58
   3  14   8  465.34   15.48
   3  14   8  419.49   13.55
   3 -14   8  454.94   16.52
   3  14   9   10.64    8.20
   3 -14   9   16.60    9.33
   3  14  10  379.71   15.87
   3  14  10  411.71   13.87
  -3  14 -10  440.74   15.07
   3 -14  10  428.15   17.49
   3  14  11   37.56    9.90
   3 -14  11    2.10   10.63
   3  14  12  172.26   13.05
   3 -14  12  180.45   14.35
   3 -14  13   38.21   10.82
   3 -14  14   20.40   10.75
   3  15 -13   11.01    9.82
  -3  15  13    8.10    8.66
  -3  15  12   13.51    8.29
   3  15 -12   27.31   10.08
  -3 -15  12   23.04    8.76
   3  15 -11   -6.11    9.47
  -3 -15  11    6.42    8.57
  -3 -15  10  304.69   13.97
  -3  15  10  319.64   13.80
   3 -15 -10  296.95   13.50
   3  15 -10  300.21   15.04
   3 -15  -9   -0.56    7.75
  -3  15   9   -7.70    7.00
  -3 -15   9   -1.66    8.55
   3  15  -9   14.44    9.03
  -3 -15   8  824.32   17.39
  -3  15   8  803.38   17.58
   3  15  -8  772.72   19.93
   3 -15  -8  802.34   18.55
   3 -15  -7    5.21    7.37
   3  15  -7    3.72    8.14
  -3  15   7    7.60    5.88
  -3 -15   7    7.02    6.69
   3 -15  -6  158.46    9.86
  -3  15   6  151.82    8.26
  -3 -15   6  183.91    9.33
   3  15  -6  164.96   11.02
  -3 -15   6  167.29   10.91
   3  15  -5   18.74    7.53
  -3  15   5   15.74    4.47
  -3 -15   5    5.93    7.53
   3  15  -4  205.30   10.60
  -3 -15   4  178.26    8.85
   3 -15  -4  190.50    8.25
   3 -15  -4  195.37   10.70
  -3 -15   3   -3.24    7.17
  -3 -15   3   -1.33    5.54
  -3  15   3    5.38    6.95
   3  15  -3    3.24    6.39
   3 -15  -3    4.58    5.39
  -3 -15   2  649.79   13.68
   3  15  -2  671.11   15.80
   3 -15  -2  652.23   14.01
  -3  15   2  672.96   16.34
   3  15  -2  656.14   14.93
   3  15  -1    4.10    6.69
  -3  15   1    3.02    6.84
   3 -15  -1    5.29    5.99
   3  15  -1    0.10    5.73
  -3 -15   1    8.37    5.74
   3  15   0 1172.02   19.80
  -3 -15   0 1152.68   17.06
   3  15   0 1166.75   17.97
   3 -15   0 1169.32   18.97
   3  15   1   11.21    4.98
   3 -15   1   13.36    6.35
  -3  15  -2   10.98    6.91
   3  15   2   14.38    6.77
  -3 -15  -2    4.45    5.27
   3 -15   2   -3.83    7.42
   3  15   2    7.91    5.03
   3  15   3   32.23    7.05
   3  15   3   23.29    5.06
  -3  15  -3   41.28    7.88
  -3  15  -4  431.60   13.90
   3  15   4  401.46   12.96
   3 -15   4  451.53   14.77
   3  15   4  424.30   10.59
  -3 -15  -4  435.37   12.81
  -3  15  -5    9.13    7.05
   3  15   5    0.67    6.54
   3  15   5    7.77    4.37
  -3 -15  -5   12.77    7.24
   3 -15   5   11.33    8.70
   3  15   6 1143.92   20.90
   3 -15   6 1156.62   22.88
  -3 -15  -6 1184.47   21.70
   3  15   7   21.66    7.66
   3  15   7   18.35    6.79
  -3 -15  -7   22.70    8.04
   3 -15   7   18.55    9.58
   3  15   8  377.67   14.70
   3 -15   8  378.24   15.77
   3  15   8  381.82   13.20
  -3  15  -8  376.20   14.20
   3  15   9    0.03    8.47
   3  15   9    6.98    6.89
  -3  15  -9    0.35    7.26
   3 -15   9   19.10   10.37
  -3  15 -10    9.04    7.37
   3  15  10   -8.05    9.51
   3 -15  10    8.40   10.87
   3  15  11   14.66    9.65
   3 -15  11   17.46   11.36
   3 -15  12  182.82   14.52
   3  15  12  161.09   13.58
   3 -15  13    5.71   10.74
   3  15  13   -5.18   10.07
   3  16 -13  -21.40   10.36
  -3  16  12  230.98   13.54
   3  16 -12  245.15   15.85
  -3 -16  12  237.21   14.33
  -3  16  11   67.19    9.36
   3  16 -11   37.58   10.30
  -3  16  10   58.47    8.84
   3  16 -10   45.97   10.64
  -3  16   9  179.98   10.67
   3  16  -9  182.73   12.71
  -3 -16   9  171.25   12.31
   3 -16  -9  163.58   11.27
   3  16  -8    8.57    9.07
   3 -16  -8    1.55    7.73
  -3  16   8   -6.49    6.39
  -3 -16   8   -0.84    8.88
   3 -16  -7  169.77   10.79
  -3 -16   7  185.73    9.93
  -3  16   7  185.81    9.35
   3  16  -7  204.78   12.25
  -3 -16   7  167.85   11.60
   3 -16  -6  689.10   17.35
  -3 -16   6  698.09   15.75
   3  16  -6  724.71   18.42
  -3 -16   6  741.64   18.38
   3 -16  -5   11.41    6.98
   3  16  -5   -4.97    7.93
  -3 -16   5    2.80    6.13
   3 -16  -4  407.44   13.90
   3  16  -4  363.26   13.20
   3 -16  -4  386.51   11.21
  -3 -16   4  398.87   12.11
  -3 -16   4  396.68   13.85
  -3 -16   3   42.54    8.40
   3  16  -3   47.43    7.82
  -3 -16   3   63.47    7.02
  -3  16   3   53.01    8.28
   3 -16  -3   55.81    6.77
   3  16  -2  122.67    9.34
  -3  16   2  137.15   10.15
   3  16  -2  119.45    8.68
  -3 -16   2  118.35    9.67
   3 -16  -2  111.77    8.04
  -3 -16   2  121.57    8.14
   3  16  -1  486.45   14.55
  -3  16   1  487.86   14.79
  -3 -16   1  453.39   11.98
   3  16  -1  476.17   13.10
   3 -16  -1  500.88   13.66
   3 -16   0  104.59    8.29
   3  16   0  132.42    9.78
  -3 -16   0  104.87    7.45
  -3  16   0  140.21   10.32
   3  16   0  131.08    8.15
   3  16   1   46.00    7.70
  -3  16  -1   39.97    7.80
  -3 -16  -1   26.83    6.06
   3 -16   1   38.86    7.44
   3  16   1   28.26    6.12
  -3  16  -2  828.01   18.42
   3  16   2  811.10   15.42
   3 -16   2  838.17   18.19
  -3 -16  -2  768.37   15.33
   3  16   2  780.27   17.60
   3  16   3    1.12    7.13
   3 -16   3    6.94    7.79
  -3  16  -3   -3.97    7.35
   3  16   3    8.18    5.32
   3 -16   4  443.52   15.33
   3  16   4  447.31   14.00
  -3  16  -4  408.13   14.58
   3  16   4  436.19   11.23
  -3 -16  -4  443.12   13.32
   3  16   5  289.73   11.96
   3  16   5  288.17    9.37
  -3  16  -5  283.87   12.62
  -3 -16  -5  322.59   12.61
   3  16   6   -9.10    7.48
  -3  16  -6    2.18    7.69
   3 -16   6    1.98    9.06
  -3 -16  -6   -0.88    7.67
   3  16   7  173.13   11.03
   3  16   7  186.13   10.63
  -3  16  -7  169.89   11.33
   3 -16   7  155.11   12.79
  -3 -16  -7  179.97   11.63
   3  16   8  107.13   10.11
   3  16   8  116.68    9.44
  -3 -16  -8  107.99   10.44
  -3  16  -8  106.68   10.25
   3 -16   8  115.60   12.02
   3  16   9   18.54    9.09
   3  16   9   27.15    7.40
   3  16  10  382.30   16.27
   3  16  10  416.07   14.30
   3 -16  10  370.67   17.83
  -3  16 -10  397.40   15.70
   3 -16  12   21.74   11.21
   3 -16  13   55.16   12.21
  -3  17  13  101.55   11.01
   3  17 -12   -2.10   10.08
  -3  17  12   -3.25    7.95
  -3 -17  12    3.56    8.88
  -3  17  11  211.86   12.50
  -3 -17  11  236.05   14.25
   3  17 -11  240.59   15.57
   3  17 -10    4.47   10.09
  -3  17  10   13.52    7.37
  -3 -17  10   10.68    9.58
   3 -17  -9    4.32    7.95
   3  17  -9    7.04    9.44
  -3 -17   9  -14.99    9.84
   3 -17  -8  164.12   10.91
  -3 -17   8  152.31   12.49
   3 -17  -7  147.95   11.00
   3  17  -7  151.64   11.78
  -3 -17   7  142.96   11.45
  -3 -17   6   17.63    8.77
   3  17  -6   -7.17    8.60
   3 -17  -6   -3.23    7.41
   3 -17  -5  740.01   18.24
  -3 -17   5  742.12   16.23
  -3 -17   5  709.30   18.64
   3  17  -5  748.09   19.10
  -3 -17   4   13.96    8.16
  -3 -17   4   11.00    6.28
   3  17  -4   13.71    8.15
   3 -17  -4   18.74    5.86
  -3 -17   3  214.07   12.00
   3 -17  -3  216.45    9.59
  -3  17   3  196.71   11.38
   3  17  -3  205.44   11.18
  -3 -17   3  204.82    9.56
  -3 -17   2  146.03   10.51
   3  17  -2  154.08   10.18
   3  17  -2  159.61    9.80
  -3 -17   2  169.69    8.99
   3 -17  -2  165.30    9.46
  -3  17   2  162.46   10.94
   3  17  -1    2.65    7.32
  -3  17   1    0.08    7.25
   3  17  -1   -3.25    6.24
  -3 -17   1   -5.04    6.02
   3 -17  -1    0.12    6.69
   3  17   0  164.75    8.86
  -3 -17   0  179.02    8.82
   3  17   0  176.59   10.64
  -3  17   0  208.18   11.54
   3 -17   0  186.28   10.50
  -3  17  -1  656.15   17.04
  -3 -17  -1  605.79   14.09
   3  17   1  613.59   14.41
   3 -17   1  609.26   16.37
   3  17   1  651.88   16.62
  -3 -17  -2    3.32    6.10
   3 -17   2    2.68    7.90
  -3  17  -2    8.30    7.62
   3  17   2    2.00    5.83
  -3 -17  -3  459.04   13.43
   3  17   3  478.32   14.88
  -3  17  -3  507.42   16.00
   3  17   3  501.01   12.72
   3 -17   3  471.89   15.42
   3  17   4   47.79    8.51
   3 -17   4   52.42   10.07
  -3 -17  -4   41.15    7.63
  -3  17  -4   47.19    9.00
   3  17   4   35.77    5.87
   3  17   5  237.38    9.28
   3  17   5  237.85   11.70
  -3 -17  -5  247.06   11.73
   3 -17   5  210.23   13.07
  -3  17  -5  236.64   12.51
  -3 -17  -6  146.19   10.72
   3  17   6  151.41   10.32
  -3  17  -6  139.57   11.46
   3 -17   6  150.67   12.48
   3  17   7   97.13    9.87
  -3 -17  -7   89.37   10.28
  -3  17  -7   86.18   10.24
   3 -17   7  101.02   12.00
   3  17   8   21.60    8.74
   3  17   8    5.70    7.08
  -3  17  -8    7.92    8.79
   3 -17   8    6.44   10.15
  -3 -17  -9  246.43   13.90
   3  17   9  245.86   13.24
   3  17   9  260.51   12.43
   3 -17   9  244.10   15.67
  -3  17  -9  264.40   13.72
   3  17  10    3.04    9.45
   3  17  10   -8.15    6.81
  -3  17 -10    4.95    8.77
   3  17  11  162.27   13.31
   3 -17  11  181.27   14.92
   3  17  12   64.92   11.38
  -3 -18  12  -13.35   10.03
   3  18 -11  132.15   13.53
  -3 -18  11  132.10   13.26
   3  18 -10    3.45   10.22
  -3 -18  10   -2.83    9.82
   3  18  -9  242.17   14.93
   3 -18  -9  241.22   13.12
  -3 -18   9  270.75   14.78
   3 -18  -8   15.58    8.14
   3  18  -8   20.09    9.76
  -3 -18   8    8.49    9.95
   3 -18  -7  364.58   14.50
   3  18  -7  374.68   16.35
  -3 -18   7  351.91   16.01
  -3 -18   6  -16.41    9.86
   3 -18  -6   -5.28    8.30
  -3 -18   5   -2.44    8.70
   3 -18  -5   -3.43    7.98
   3  18  -5    3.78    8.83
   3 -18  -4   68.21    9.56
  -3 -18   4   57.34   10.02
   3  18  -4   74.62    9.92
  -3 -18   3  523.10   16.71
   3  18  -3  580.79   16.43
  -3 -18   3  553.26   14.14
   3 -18  -3  559.57   14.83
   3 -18  -2    5.86    6.81
  -3  18   2    4.36    8.08
  -3 -18   2    3.93    8.52
   3  18  -2    8.78    7.19
  -3 -18   2   12.45    6.46
  -3 -18   1  405.11   14.79
  -3 -18   1  403.14   12.30
   3  18  -1  426.57   14.83
   3 -18  -1  460.97   14.35
  -3  18   1  452.37   14.97
   3  18  -1  469.49   14.17
  -3 -18   0   -5.37    6.39
   3  18   0    0.95    6.62
  -3  18   0    6.67    7.88
   3  18   0    1.64    7.73
   3 -18   0    1.80    7.75
   3  18   1  455.37   15.50
  -3 -18  -1  455.24   13.02
  -3  18  -1  476.67   15.77
   3  18   1  426.31   13.11
   3 -18   1  453.99   15.07
   3  18   2   29.95    8.58
   3  18   2   42.46    7.14
  -3  18  -3  121.32   10.89
   3  18   3  105.38    7.74
   3 -18   3  122.11   11.08
  -3 -18  -3  132.36    9.22
   3  18   3  138.06   10.52
   3  18   4   13.30    7.67
  -3 -18  -4   -6.76    7.49
  -3  18  -4    8.68    8.30
   3  18   4    6.86    5.46
   3 -18   4   -7.09    9.55
   3  18   5  421.47   15.28
  -3 -18  -5  432.01   14.88
   3 -18   5  398.17   16.43
  -3 -18  -6   14.38    7.63
  -3  18  -6   -3.08    8.56
   3  18   6    1.31    7.73
   3 -18   6    4.84   10.30
  -3 -18  -7  475.74   16.26
   3  18   7  502.19   16.38
  -3  18  -7  477.57   17.31
   3 -18   7  509.03   19.01
   3 -18   8   14.85   10.73
  -3 -18  -8   22.76    9.18
   3  18   8    6.45    7.42
  -3  18  -8   11.46    8.70
   3  18   9   65.66    8.68
  -3 -18  -9   74.16   10.75
   3  18  10   22.30    9.37
  -3  18 -10    0.72    8.59
   3 -18  10   -3.89   10.97
  -3 -18 -10   10.65    9.56
  -3 -18 -11   93.87   11.89
   3  19 -11   96.31   13.37
  -3 -19  11  156.37   13.83
   3  19 -10   27.55   10.92
  -3 -19   9   13.54    9.95
   3 -19  -9    6.02    8.69
   3  19  -9   -1.42   10.30
   3 -19  -8  159.82   11.99
   3  19  -8  187.81   14.09
  -3 -19   8  184.11   13.55
   3 -19  -7   98.44   10.42
  -3 -19   7   88.00   11.71
   3  19  -7   99.71   11.89
  -3 -19   6    0.46    9.75
   3 -19  -6    3.11    8.25
   3  19  -6   19.17    9.83
   3 -19  -5  389.06   14.81
   3  19  -5  372.35   15.89
  -3 -19   5  396.32   16.57
   3 -19  -4    4.49    8.30
  -3 -19   4  -12.12   10.11
   3  19  -4    8.52    8.66
   3  19  -3  203.01   12.03
  -3  19   3  193.20   11.96
  -3 -19   3  186.75   12.79
   3 -19  -3  181.24   10.69
  -3 -19   2  400.89   15.57
  -3  19   2  443.49   15.67
   3  19  -2  404.19   14.39
  -3 -19   2  405.98   12.91
   3 -19  -2  418.88   14.23
  -3 -19   1   -3.67    8.61
  -3  19   1   16.10    8.34
   3  19  -1   -0.14    7.30
   3 -19  -1    0.14    7.34
   3  19   0   30.71    8.79
  -3 -19   0   23.08    6.63
   3 -19   0   13.70    8.09
   3  19   1  388.66   15.07
  -3 -19  -1  398.30   12.78
  -3  19  -1  423.24   15.80
   3  19   1  440.86   13.62
   3 -19   1  413.06   14.94
  -3 -19  -2   26.87    7.19
   3  19   2   41.21    9.06
   3  19   2   23.95    6.70
   3  19   3  331.27   11.74
  -3  19  -3  332.57   14.57
   3 -19   3  303.49   14.52
  -3 -19  -3  316.84   12.17
  -3 -19  -4   88.64    8.93
   3  19   4   92.83   10.61
  -3  19  -4   69.09   10.02
   3 -19   4  109.15   11.83
   3  19   4   80.56    7.47
   3  19   5  141.83   11.04
  -3 -19  -5  156.08   10.89
   3 -19   5  147.26   12.99
  -3  19  -5  153.94   12.26
   3  19   6  248.69   13.05
  -3  19  -6  252.79   14.35
  -3 -19  -6  219.35   12.62
   3 -19   6  255.92   15.64
   3  19   7   67.09    9.73
  -3  19  -7   54.87   10.41
  -3 -19  -7   65.50    9.71
  -3 -19  -8   51.17    9.77
   3  19   8   69.07    9.18
  -3  19  -8   70.52   10.87
   3  19   9  127.12   10.35
  -3  19  -9  132.94   12.07
   3 -19   9  119.42   13.63
  -3 -19  -9  126.94   12.13
  -3 -19 -10   -6.40    9.25
  -3  19 -10  -10.82    9.11
   3 -19  10   18.57   12.20
  -3 -19 -11   84.66   11.71
   3  20 -10   49.95   11.35
   3  20  -9   29.36   11.00
  -3 -20   9   19.25   10.75
   3 -20  -8   12.01    8.07
   3  20  -8   16.88   10.85
  -3 -20   8   29.61   10.89
   3 -20  -7   69.95    9.80
   3  20  -7   52.37   10.94
  -3 -20   7   85.28   12.20
   3 -20  -6  250.74   13.44
   3  20  -6  281.40   15.46
  -3 -20   6  235.30   14.94
  -3 -20   5  -12.95   10.38
   3 -20  -5   10.46    8.68
   3  20  -5    0.40    8.95
   3 -20  -4  472.47   16.68
   3  20  -4  508.97   17.66
  -3 -20   4  487.99   17.83
  -3 -20   3   22.84    9.90
  -3  20   3   19.55    9.02
   3  20  -2   67.73    9.90
  -3  20   2   50.11    9.43
  -3 -20   1  161.54   12.25
   3  20  -1  161.22   10.87
  -3  20   1  177.29   11.95
   3 -20  -1  172.60   11.45
   3  20   0   71.14   10.81
  -3 -20   0   58.59    7.74
  -3 -20   0   68.64   10.39
   3  20   0   66.08    8.72
  -3  20   0   85.24   10.35
   3 -20   0   72.20    9.90
  -3 -20  -1   16.80    9.24
  -3 -20  -1   20.83    6.96
   3  20   1   19.93    9.57
  -3  20  -1   11.62    8.99
   3  20   1    9.65    6.92
   3  20   2  335.50   14.95
   3  20   2  317.58   12.53
  -3 -20  -2  294.13   12.10
   3 -20   2  332.76   15.32
  -3  20  -2  318.94   14.45
   3 -20   3   -1.44    9.89
   3  20   3   -3.80    8.32
  -3  20  -3   18.79    9.05
  -3 -20  -3   10.92    7.23
   3  20   4  273.00   11.06
   3  20   4  278.89   14.32
  -3  20  -4  286.47   14.87
  -3 -20  -4  278.19   12.42
   3  20   5   79.46   10.37
  -3 -20  -5   82.72    9.47
  -3  20  -5   74.42   10.54
   3 -20   5   70.35   11.89
   3  20   6   -5.00    8.40
  -3 -20  -6   -4.95    8.06
   3  20   7   12.03    8.51
  -3 -20  -7   14.48    8.64
   3 -20   7    2.01   11.31
   3  20   8   77.12    9.46
   3 -20   8   97.35   13.32
  -3  20  -8   73.35   10.84
  -3 -20  -8   95.15   11.01
  -3 -20  -9    0.71    9.03
  -3  20  -9   12.92    9.17
   3 -20   9   -5.93   11.54
  -3 -20 -10  210.14   14.10
   3 -20  10  231.98   17.47
  -3  20 -10  220.39   14.53
   3  21  -9  -13.94   11.33
  -3 -21   9   -7.95   11.13
   3 -21  -8  269.24   14.00
   3  21  -8  229.30   15.63
  -3 -21   8  243.21   16.14
   3 -21  -7    1.56    8.28
   3  21  -7   -6.83   10.95
  -3 -21   7  -10.46   10.99
   3  21  -6   58.86   11.11
  -3 -21   5    0.44   10.61
   3 -21  -5   -5.58    8.27
   3  21  -5   14.07    9.49
   3  21  -4   12.29    9.01
   3 -21  -4    5.90    8.50
  -3 -21   3    4.13   10.28
   3 -21  -3   -7.30    8.87
  -3  21   3  -11.96    9.45
   3  21  -3   -7.19    9.80
   3 -21  -2  578.25   17.63
  -3  21   2  593.98   18.48
   3  21  -2  556.21   17.55
  -3 -21   2  579.78   19.22
  -3 -21   1   -7.61   10.04
   3  21  -1    7.04    7.92
   3 -21  -1   -7.76    8.74
  -3  21   1    3.79    9.45
  -3 -21   0  276.95   14.97
  -3  21   0  287.21   14.48
   3  21   0  257.25   12.43
   3 -21   0  271.92   14.17
  -3 -21  -1   14.45    9.62
   3  21   1    3.39    9.23
  -3  21  -1   -0.89    8.85
   3  21   1   11.26    7.31
   3  21   2   18.92    9.53
  -3 -21  -2   18.63    9.91
   3 -21   2   18.01    9.57
  -3  21  -3    3.81    9.25
   3  21   3    3.94    6.58
   3  21   3   12.68    9.39
  -3 -21  -3   -1.23    7.21
   3 -21   3    9.85   10.44
   3  21   4  125.30   12.24
  -3  21  -4  142.86   12.49
   3 -21   4  136.07   13.66
  -3 -21  -4  105.48    9.39
   3  21   5    6.75    9.07
  -3  21  -5    3.10    9.58
  -3 -21  -5    5.51    7.73
   3  21   6  360.34   15.77
  -3 -21  -6  393.26   15.31
   3 -21   6  376.29   18.72
  -3  21  -6  401.60   17.70
   3 -21   7   -8.63   11.39
   3  21   7    2.67    7.93
  -3 -21  -7    5.08    8.18
  -3  21  -7    7.10    9.85
   3  21   8  145.34   11.51
  -3  21  -8  167.24   13.78
  -3 -21  -8  166.55   12.42
   3 -21   8  146.57   14.85
  -3  21  -9    3.66    9.50
   3 -21   9    0.93   12.57
   3 -22  -8   21.13    8.73
  -3 -22   8    4.36   10.87
  -3 -22   6   72.29   12.60
   3 -22  -6   92.86   10.56
   3  22  -6  113.73   13.30
  -3 -22   5  -18.77   10.99
   3 -22  -5  -12.69    8.81
   3  22  -5    0.58    9.94
   3 -22  -4  292.25   14.50
   3  22  -4  243.56   14.56
  -3 -22   4  254.10   15.56
   3 -22  -3  118.74   11.46
  -3  22   3  116.65   11.77
   3  22  -3   90.39   10.84
  -3 -22   2    7.27   10.30
   3  22  -2   16.00    9.11
  -3  22   2   -1.48    9.71
  -3  22   1   86.45   11.21
   3  22  -1   87.34    9.91
   3 -22  -1   92.52   10.87
  -3 -22   1   86.40   11.91
  -3 -22   0   46.10   10.48
   3  22   0   69.43    9.25
   3 -22   0   69.08   11.13
  -3  22   0   69.54   11.00
  -3 -22  -1   80.86   11.21
   3  22   1   87.88    9.66
   3 -22   1   83.71   11.59
  -3  22  -1   88.13   11.27
  -3 -22  -2  330.66   16.00
   3  22   2  290.98   15.07
  -3  22  -2  346.21   16.03
   3  22   2  319.61   13.12
   3 -22   2  326.78   16.60
  -3  22  -3  -12.61    9.60
  -3 -22  -3    6.57    9.77
   3 -22   3    8.11   10.28
   3  22   3    9.46    6.91
   3  22   3   16.97    9.57
   3  22   4  118.11   12.35
   3 -22   4  152.52   14.49
  -3  22  -4  116.27   11.95
   3  22   5   32.76    9.88
  -3  22  -5   53.13   10.87
   3 -22   5   70.03   12.49
  -3  22  -6    0.57    9.68
  -3 -22  -6   11.08    8.42
   3 -22   6   17.00   11.80
   3  22   7  101.14   10.75
  -3 -22  -7   94.38   10.77
   3 -22   7  111.52   13.97
  -3  22  -7  102.26   12.31
   3  22   8   94.05   10.38
  -3 -22  -8   90.82   11.08
   3 -23  -7   83.25   10.58
  -3 -23   6   10.36   11.48
   3 -23  -6    0.35    8.71
   3 -23  -5  136.27   11.90
   3  23  -5  118.67   12.61
  -3 -23   5  131.00   14.34
  -3 -23   4   21.36   11.39
   3  23  -4   18.48    9.82
   3 -23  -3  173.48   12.90
   3  23  -3  148.58   12.66
  -3  23   3  154.27   12.22
  -3 -23   3  160.92   14.13
  -3 -23   2   46.55   10.97
  -3  23   2   53.89   10.41
   3  23  -2   39.68    9.16
  -3 -23   1   21.70   10.28
   3 -23  -1   22.21    9.24
   3  23   0   38.74    9.06
  -3 -23  -1  216.89   15.01
  -3  23  -1  169.70   13.20
   3  23   1  203.93   12.05
   3 -23   1  201.18   14.09
  -3 -23  -2   25.04   10.59
   3 -23   2   13.58   10.68
  -3  23  -2   -5.02    9.84
  -3 -23  -3  264.53   15.50
   3  23   3  284.78   12.73
  -3  23  -3  267.40   15.17
   3 -23   3  259.58   16.51
   3 -23   4   14.50   11.58
   3  23   5   92.84   11.33
   3  23   6   15.42    8.95
   3 -23   6   -3.85   11.72
  -3  23  -6   -0.37   10.33
   3  23   7    0.04    8.77
   3 -24  -5   -0.44    8.89
   3 -24  -4    3.31    8.89
   3  24  -4   -9.41    9.62
   3 -24  -3  103.62   11.83
  -3  24   3  103.15   11.65
   3  24  -3   98.55   11.70
  -3 -24   3   99.42   13.54
  -3 -24   2   13.27   11.43
   3  24  -2   14.46    9.64
   3 -24  -2   15.95    9.58
  -3  24   1  385.77   17.55
   3  24  -1  376.00   16.44
   3 -24  -1  346.51   16.23
  -3 -24   1  344.18   17.88
  -3 -24   0  -19.34   11.31
  -3  24   0  -11.58   10.24
   3  24   0   18.04    8.57
   3 -24   0   -9.63   10.23
  -3 -24  -1   84.48   12.61
   3  24   1   81.78    9.69
  -3  24  -1   65.42   11.60
   3 -24   1   84.12   11.86
  -3 -24  -2   19.79   10.86
  -3  24  -2   14.72   10.58
   3  24   2    5.13    7.22
   3 -24   2    0.05   10.46
  -3 -24  -3    0.36   10.28
   3 -24   3   15.28   11.85
  -3 -24  -4   -9.16    9.53
  -3  24  -4   -3.75    9.58
   3 -24   4   -3.36   11.88
   3  24   5  203.13   14.21
  -3 -24  -5  164.22   13.30
  -3 -24  -6  -10.67    8.80
   3  24   6    6.44    8.59
   3  25  -1   16.32    9.35
  -3 -25   0  109.33   13.81
   3 -25   0  126.35   13.38
   3  25   0   85.44   10.58
   3  25   1  102.48   10.36
  -3 -25  -1  103.88   13.74
   3 -25   1   83.81   12.40
   3  25   2   -0.60    7.42
   3 -25   2   14.84   11.07
  -4   0  16   42.41   10.62
  -4   0  15    9.12    9.12
  -4   0  14   80.04   10.99
   4   0 -14   99.42    9.03
   4   0 -13    7.00    7.18
  -4   0  13    9.98    8.48
  -4   0  12  497.26   16.49
   4   0 -12  470.85   14.44
  -4   0  11    6.63    7.59
   4   0 -11   -4.71    7.12
   4   0 -10 1298.87   20.62
  -4   0  10 1260.16   21.22
   4   0  -9   -2.71    6.49
  -4   0   9    4.60    6.41
  -4   0   8    5.14    6.12
   4   0  -8   11.85    6.37
  -4   0   7   11.41    5.59
   4   0  -7    6.52    6.60
  -4   0   6 1222.06   16.21
   4   0  -6 1190.58   17.44
  -4   0   5   -0.80    1.39
  -4   0   5    3.00    4.27
   4   0  -5   -4.52    6.20
   4   0  -4  925.30    7.06
  -4   0   4  896.69   12.36
   4   0  -4  916.60   14.34
  -4   0   3    0.91    3.46
   4   0  -3    1.58    4.94
   4   0  -2 3522.84   17.42
  -4   0   2 3588.31   21.32
   4   0  -2 3566.79   24.18
  -4   0   1    2.26    2.96
   4   0  -1    2.57    2.43
   4   0  -1   -0.65    3.77
  -4   0   0 2744.39   16.65
   4   0   0 2797.96   17.96
   4   0   0 2703.62   19.11
  -4   0  -1   -2.18    2.63
   4   0   1    3.68    2.94
   4   0   1   -1.49    2.88
  -4   0  -2  650.55    8.32
   4   0   2  632.89   10.25
   4   0   2  678.85    8.68
  -4   0  -3    1.23    2.76
   4   0   3    0.33    3.73
   4   0   3    4.45    2.39
   4   0   4 3695.79   21.55
   4   0   4 3615.53   26.08
   4   0   4 3633.02   15.65
   4   0   5   13.35    3.71
   4   0   5    7.00    4.77
   4   0   5   -0.52    1.59
   4   0   6  136.59    6.13
   4   0   6  125.32    7.30
   4   0   7    1.68    4.32
   4   0   7    5.01    5.62
   4   0   8  315.51    9.72
   4   0   8  302.89   10.56
   4   0   9   -4.08    5.21
   4   0   9   -1.55    6.04
   4   0  10 1447.49   21.27
   4   0  10 1483.07   21.99
   4   0  11   11.48    6.37
   4   0  11   -0.10    6.48
   4   0  12  462.20   14.49
   4   0  12  450.08   14.15
   4   0  13   11.85    7.30
   4   0  13    7.83    7.26
   4   0  14   67.25    9.13
   4   0  14   67.78    8.76
   4   0  15    6.79    8.32
   4   0  15   -5.33    7.22
   4   0  16   87.15   10.25
  -4   1  16   67.30   11.19
  -4  -1  16   76.43   11.42
  -4   1  15    9.06    8.78
  -4  -1  15  -10.43    9.58
   4   1 -14  240.86   11.82
  -4   1  14  260.36   14.53
  -4  -1  14  265.93   14.01
   4  -1 -14  237.21   12.00
   4  -1 -13   36.91    7.91
  -4  -1  13   13.47    8.70
   4  -1 -12    0.31    7.10
  -4   1  12    4.83    7.73
  -4  -1  12   12.98    8.09
  -4  -1  11  295.20   12.29
  -4   1  11  296.79   12.62
   4   1 -11  314.15   11.83
   4  -1 -11  290.86   11.71
  -4   1  10  245.48   11.10
   4   1 -10  265.45   10.92
   4  -1 -10  246.83   10.73
  -4  -1  10  277.20   11.66
  -4   1   9    3.67    6.54
   4   1  -8 2348.68   25.45
   4  -1  -8 2356.01   25.60
  -4   1   8 2254.59   24.73
  -4  -1   8 2270.86   24.72
  -4  -1   7   41.51    6.17
  -4   1   7   27.70    5.85
  -4  -1   7   23.73    2.14
   4   1  -7   18.00    6.48
   4  -1  -7   32.12    7.35
  -4   1   6  554.72   11.39
   4   1  -6  577.26   12.68
  -4  -1   6  517.18   11.02
  -4  -1   6  533.67    5.79
   4  -1  -6  564.68   13.10
  -4  -1   5 1728.75   10.29
  -4   1   5 1738.46   17.76
  -4  -1   5 1774.10   18.37
   4   1  -5 1752.05   19.66
   4  -1  -5 1792.35   20.35
   4   1  -4  104.10    3.13
   4  -1  -4  102.75    2.25
  -4   1   4  103.69    5.43
   4   1  -4   92.01    6.46
   4  -1  -4  108.21    7.11
   4   1  -3  676.77    7.53
   4  -1  -3  652.65    6.41
  -4   1   3  664.73   10.00
  -4  -1   3  679.83   10.49
   4   1  -3  649.56   11.61
   4  -1  -3  646.39   11.81
   4   1  -2 2738.70   16.13
   4  -1  -2 2747.35   14.74
  -4   1   2 2795.95   18.41
  -4  -1   2 2709.05   18.72
   4   1  -2 2675.96   20.90
   4  -1  -2 2783.12   21.97
  -4  -1   1 1068.52   11.46
   4   1  -1 1037.64   10.70
   4  -1  -1 1063.37   10.32
  -4   1   1 1070.48   10.82
   4   1  -1 1017.17   12.61
   4  -1  -1 1067.07   13.38
  -4   1   0 4343.99   20.04
  -4  -1   0 4353.05   21.37
   4  -1   0 4422.38   22.43
   4   1   0 4426.33   22.76
   4  -1   0 4320.75   24.28
  -4   1  -1   31.87    2.78
   4   1   1   39.90    3.79
   4  -1   1   35.22    3.93
  -4  -1  -1   28.51    3.14
   4   1   1   22.07    3.34
   4  -1   1   32.31    3.65
  -4  -1  -2 1398.36   12.40
   4   1   2 1359.41   14.62
   4  -1   2 1347.57   14.77
   4   1   2 1374.37   11.52
  -4   1  -2 1310.69   10.86
   4  -1   2 1349.54   12.23
   4   1   3  345.48    8.39
   4  -1   3  330.94    8.44
  -4   1  -3  329.11    6.19
   4   1   3  346.73    5.41
  -4  -1  -3  363.35    7.22
   4  -1   3  352.09    6.20
   4  -1   4  117.59    4.72
   4   1   4  134.63    5.28
  -4  -1  -4  133.09    5.38
   4   1   4  137.36    6.57
   4  -1   4  126.93    6.48
  -4   1  -4  119.89    4.82
   4   1   4  128.16    2.95
   4  -1   4  131.10    3.95
   4  -1   5   32.76    2.44
   4  -1   5   33.59    3.80
   4   1   5   28.55    5.00
   4  -1   5   28.04    5.51
   4   1   5   43.23    4.52
   4   1   6  607.38   11.42
   4  -1   6  581.58   10.26
   4  -1   6  583.39   12.49
   4   1   6  605.61   12.46
   4  -1   6  596.90    5.64
   4   1   7    8.38    4.46
   4  -1   7    5.95    4.27
   4  -1   7   13.82    5.87
   4   1   8 1284.23   18.16
   4  -1   8 1323.35   17.53
   4   1   8 1404.30   19.83
   4  -1   8 1390.65   20.14
   4   1   9  543.27   13.17
   4  -1   9  546.05   12.70
   4   1   9  539.09   13.60
   4  -1   9  584.04   14.27
   4   1  10    6.69    5.94
   4  -1  10    1.55    5.80
   4   1  10   10.36    6.18
   4  -1  10    9.82    6.66
   4   1  11  319.90   12.12
   4  -1  11  317.35   11.58
   4   1  11  314.71   11.84
   4  -1  11  304.56   11.84
   4   1  12  147.02   10.11
   4  -1  12  131.94    9.33
   4   1  12  156.65    9.78
   4  -1  12  142.01    9.61
   4   1  13   70.79    8.90
   4  -1  13   68.24    8.49
   4   1  13   61.72    8.06
   4  -1  13   55.76    8.30
   4   1  14  259.20   13.08
   4  -1  14  239.60   12.16
   4   1  14  247.44   11.98
   4  -1  14  263.54   12.50
   4   1  15  -14.18    8.59
   4   1  15   -9.72    7.66
   4  -1  15   -7.84    7.56
   4   1  16  173.25   12.07
  -4  -2  16    4.27    9.42
  -4   2  16    6.26    9.81
  -4   2  15  188.91   13.51
  -4  -2  15  181.97   13.14
  -4   2  14   24.53    9.24
   4   2 -13   69.87    8.58
  -4   2  13   67.68    9.71
  -4  -2  13   71.66   10.26
   4  -2 -13   84.67    8.95
   4   2 -12  154.79   10.10
  -4  -2  12  148.05   10.93
  -4   2  12  166.33   11.67
   4  -2 -12  134.40    9.88
  -4  -2  11   18.95    7.42
  -4   2  11   38.87    8.30
   4  -2 -11   17.88    6.95
  -4   2  10  147.25    9.77
  -4  -2  10  150.70    9.73
   4   2 -10  145.00    8.89
   4  -2 -10  139.87    9.33
  -4   2   9 1130.98   19.22
   4   2  -9 1141.91   18.97
  -4  -2   9 1098.82   18.82
  -4  -2   8   51.97    6.86
   4   2  -8   56.52    7.19
   4  -2  -8   49.95    7.88
  -4   2   8   46.42    6.76
  -4  -2   7 1295.24   17.93
  -4  -2   7 1248.35   10.26
   4   2  -7 1263.75   18.40
   4  -2  -7 1333.28   19.44
  -4   2   7 1261.87   17.71
  -4  -2   6  311.03    9.30
  -4  -2   6  321.36    5.42
   4   2  -6  300.83   10.02
   4  -2  -6  309.82   10.61
  -4   2   6  306.12    8.98
  -4  -2   5  365.84    5.74
  -4   2   5  359.85    8.86
  -4  -2   5  358.38    9.23
   4  -2  -5  372.64   10.91
   4   2  -5  342.62    9.80
  -4   2   4  204.36    6.65
   4   2  -4  228.28    4.75
   4   2  -4  228.02    8.10
  -4  -2   4  243.34    7.45
   4  -2  -4  225.22    8.73
   4   2  -3  247.22    5.15
  -4   2   3  250.72    6.63
   4  -2  -3  238.49    3.89
  -4  -2   3  240.14    7.05
   4   2  -3  230.77    7.45
   4  -2  -3  230.16    8.02
   4   2  -2  883.58    9.83
   4   2  -2  871.25   12.10
  -4   2   2  940.48   10.65
   4  -2  -2  887.35    8.40
   4  -2  -2  881.57   13.07
  -4  -2   2  901.97   11.45
   4   2  -1 4502.78   23.02
   4  -2  -1 4609.39   21.04
  -4   2   1 4577.19   21.73
   4  -2  -1 4493.74   26.64
  -4  -2   1 4553.30   23.39
  -4  -2   0  283.02    6.30
   4   2   0  286.29    6.61
   4  -2   0  284.04    7.07
   4  -2   0  272.60    6.30
  -4   2   0  271.78    5.46
   4   2   0  277.17    6.45
  -4  -2  -1 2297.90   16.09
  -4   2  -1 2273.64   13.56
   4   2   1 2225.59   18.01
   4  -2   1 2192.58   17.16
   4   2   1 2291.60   15.24
   4  -2   1 2299.79   18.11
  -4  -2  -2  918.51   10.72
   4   2   2  951.61   12.62
  -4   2  -2  903.02    8.72
   4   2   2  955.13    9.00
   4  -2   2  935.91   12.66
   4  -2   2  930.66   10.69
   4  -2   3    5.67    2.80
   4  -2   3    6.01    4.18
  -4  -2  -3   -0.49    3.26
   4   2   3    5.73    3.93
  -4   2  -3   -1.22    2.30
   4   2   3    3.64    1.77
   4  -2   4  515.83    7.42
   4   2   4  520.19    9.33
  -4  -2  -4  513.16    9.43
  -4   2  -4  541.07    7.98
   4   2   4  507.16   10.56
   4  -2   4  534.58   11.13
   4   2   4  510.28    4.57
   4  -2   5  526.60    8.75
   4   2   5  555.41   10.35
   4  -2   5  530.26    7.13
   4   2   5  513.02   11.06
   4  -2   5  528.68   11.79
   4  -2   6  194.24    4.36
   4   2   6  200.77    7.68
   4  -2   6  197.35    6.52
   4  -2   6  205.82    8.85
   4   2   6  213.81    8.55
   4  -2   7 2140.87   11.78
   4   2   7 2174.42   22.61
   4  -2   7 2180.75   20.08
   4   2   7 2250.15   23.82
   4  -2   7 2268.98   24.66
   4   2   8  151.15    7.94
   4  -2   8  152.55    7.09
   4   2   8  175.57    8.87
   4  -2   8  170.01    9.37
   4   2   9  181.28    9.17
   4  -2   9  171.09    7.94
   4   2   9  195.41    9.58
   4  -2   9  201.11    9.98
   4   2  10  300.96   11.41
   4  -2  10  292.04   10.20
   4   2  10  311.21   11.55
   4  -2  10  324.23   12.16
   4   2  11    6.41    6.68
   4   2  11   10.76    6.11
   4  -2  11    0.71    7.11
   4   2  12   91.82    9.10
   4  -2  12  104.31    8.64
   4   2  12   92.75    8.28
   4  -2  12   90.26    9.06
   4   2  13  356.56   14.09
   4  -2  13  371.25   13.38
   4   2  13  363.78   13.54
   4  -2  13  361.87   13.64
   4  -2  14   10.68    7.20
   4   2  14   19.15    7.36
   4  -2  14   16.39    7.83
   4  -2  15  185.84   11.57
   4   2  15  150.20   10.07
   4  -2  15  158.96   10.62
   4   2  15  183.13   12.32
  -4   3  16    1.02    9.85
  -4  -3  16   18.77   10.36
  -4   3  15   -7.39   10.13
  -4  -3  15   10.36    9.84
  -4   3  14  -10.13    9.00
   4   3 -14    8.36    7.69
  -4   3  13  305.98   14.72
  -4  -3  13  305.89   14.24
   4   3 -13  303.28   13.09
   4  -3 -13  307.98   12.54
  -4  -3  12    3.77    8.03
   4   3 -12   14.55    7.30
  -4   3  12   -0.57    8.12
   4  -3 -12    3.43    7.41
   4  -3 -11  752.98   17.12
   4   3 -11  694.73   16.44
  -4   3  11  721.38   18.29
  -4  -3  11  750.68   17.96
  -4  -3  10   13.41    7.08
   4   3 -10   11.95    6.38
   4  -3 -10    6.98    7.20
  -4   3   9  199.26    9.77
   4   3  -9  205.63    9.71
   4  -3  -9  212.60   10.65
  -4  -3   9  211.87    9.98
  -4   3   8   16.52    5.87
  -4  -3   8   16.07    5.93
  -4  -3   8   10.56    2.85
  -4  -3   7  363.20   10.59
   4   3  -7  375.20   11.10
  -4  -3   7  347.20    6.44
   4  -3  -7  361.21   11.61
  -4  -3   6  134.02    7.54
   4   3  -6  137.70    7.99
   4  -3  -6  132.34    8.46
  -4   3   6  149.92    7.20
  -4  -3   6  139.84    4.49
  -4  -3   5 3912.35   19.29
   4   3  -5 3781.46   19.15
  -4  -3   5 3918.75   27.31
  -4   3   5 3825.11   26.18
   4   3  -5 3745.36   28.17
   4  -3  -5 3950.44   30.32
  -4   3   4   19.55    4.10
   4   3  -4   23.84    2.84
  -4  -3   4   19.63    4.99
   4  -3  -4   12.82    5.74
  -4   3   3 3407.29   21.31
   4   3  -3 3411.61   18.71
   4  -3  -3 3340.36   13.17
  -4  -3   3 3329.43   22.99
   4  -3  -3 3317.23   25.58
   4  -3  -2   48.05    5.20
   4   3  -2   43.42    3.47
  -4   3   2   34.72    3.44
   4  -3  -2   44.51    2.78
  -4  -3   2   43.56    4.41
   4   3  -2   48.12    4.64
  -4  -3   1 1291.56   13.14
   4   3  -1 1244.17   12.66
   4  -3  -1 1294.50   12.00
  -4   3   1 1285.11   11.45
   4   3  -1 1316.53   13.47
   4  -3  -1 1288.84   14.88
   4  -3   0    2.94    3.47
  -4  -3   0    2.83    3.26
   4  -3   0    0.57    3.17
   4  -3   1  618.64    9.96
  -4   3  -1  664.01    7.22
   4   3   1  663.50   10.37
   4  -3   1  628.19   10.14
  -4  -3  -1  631.22    9.14
   4   3   1  631.31    8.18
   4  -3   2   92.49    4.48
   4   3   2  109.47    3.56
   4  -3   2  108.56    5.74
  -4  -3  -2  112.54    4.85
   4   3   2  117.26    5.57
  -4   3  -2  107.36    3.37
   4  -3   3 1816.20   15.01
  -4  -3  -3 1916.02   16.65
  -4   3  -3 1855.67   11.99
   4   3   3 1857.94   18.38
   4  -3   3 1917.38   19.24
   4   3   3 1873.81   10.51
   4  -3   4  190.68    5.40
   4   3   4  199.92    6.65
  -4   3  -4  197.23    4.79
   4   3   4  197.62    7.59
  -4  -3  -4  215.61    7.14
   4  -3   4  213.48    8.20
   4   3   4  194.51    2.89
   4  -3   5  675.37    8.75
   4  -3   5  657.35    9.13
   4   3   5  669.22   11.65
   4   3   5  625.19   12.35
   4  -3   5  652.22   13.11
   4   3   6   49.54    5.46
   4  -3   6   46.73    4.24
   4   3   6   44.76    5.90
   4  -3   6   46.08    6.61
   4  -3   6   40.89    3.22
   4  -3   7    3.25    2.48
   4   3   7   -0.38    5.23
   4  -3   7    3.42    3.89
   4   3   7    4.99    5.65
   4  -3   7    6.66    6.42
  -4   3  -7    6.88    2.46
   4   3   8   -2.00    5.84
   4  -3   8    0.57    3.99
   4   3   8   11.23    5.86
   4  -3   8    4.33    6.32
   4   3   9 1132.73   19.16
   4  -3   9 1072.07   16.18
   4  -3   9 1102.15   19.29
   4   3  11  849.43   18.62
   4  -3  11  825.11   16.56
   4  -3  11  820.57   18.18
   4   3  12   13.83    7.84
   4  -3  12   -0.75    6.26
   4   3  12    9.73    6.85
   4  -3  12   10.02    7.06
   4   3  13  196.84   12.03
   4  -3  13  195.19   10.56
   4   3  13  204.61   11.14
   4  -3  13  187.50   11.24
   4   3  14    3.71    8.39
   4  -3  14    3.18    6.78
   4   3  14   -4.65    7.01
   4  -3  14   -8.39    7.49
   4   3  15   11.58    8.83
   4   3  15   18.09    7.17
   4  -3  15    5.54    7.50
   4  -3  16  -12.88    7.62
   4   3  16   24.20    9.12
  -4  -4  16   -7.33    9.62
  -4   4  16    9.12    9.56
  -4   4  15  249.91   14.60
  -4  -4  15  238.27   14.50
  -4   4  14   15.23    9.78
   4   4 -14   17.55    7.63
  -4  -4  14   28.61    9.65
  -4   4  13  140.95   11.70
   4   4 -13  155.46   10.56
  -4  -4  13  122.38   11.41
   4  -4 -13  141.52   10.13
  -4   4  12   54.79    9.21
   4   4 -12   43.77    8.23
  -4  -4  12   56.61    8.83
   4  -4 -12   49.67    8.37
   4  -4 -11   28.48    7.80
  -4   4  11   19.03    7.74
   4   4 -10  151.19    9.37
  -4   4  10  169.10   10.26
   4  -4 -10  166.76   10.18
  -4  -4  10  145.50    9.64
   4   4  -9  796.33   16.20
   4  -4  -9  830.43   17.19
  -4  -4   9  797.02   16.56
  -4  -4   8   56.21    6.97
  -4   4   8   44.35    6.51
   4   4  -8   44.74    6.81
   4  -4  -8   39.98    7.94
  -4  -4   8   42.29    3.82
  -4  -4   7 1228.06   17.94
  -4  -4   7 1224.05   12.47
   4   4  -7 1204.63   18.18
  -4   4   7 1242.35   17.91
   4  -4  -7 1252.83   19.30
  -4  -4   6  435.74   10.98
  -4   4   6  444.51   10.63
   4  -4  -6  473.32   12.53
   4   4  -6  435.04   11.27
  -4  -4   6  464.40    7.83
   4   4  -5  221.21    5.66
  -4  -4   5  206.15    5.64
  -4  -4   5  220.16    8.38
   4   4  -5  195.12    8.12
   4  -4  -5  226.92    9.71
  -4   4   5  218.55    7.35
  -4   4   4 1398.30   14.95
   4   4  -4 1388.11   12.80
  -4  -4   4 1383.44   16.25
   4  -4  -4 1423.46   18.26
  -4   4   3  486.59    8.53
   4   4  -3  471.44    7.84
   4  -4  -3  462.42    5.41
  -4  -4   3  464.72    9.61
   4   4  -3  473.97    9.86
   4  -4  -3  461.59   10.61
  -4   4   2  759.34    9.50
   4   4  -2  759.10   10.04
   4  -4  -2  734.20   12.39
   4   4  -2  738.16   11.07
  -4  -4   2  762.95   11.23
   4  -4  -2  759.43    8.58
   4   4  -1 1930.97   16.22
  -4  -4   1 1903.80   16.39
   4   4  -1 1955.77   16.29
  -4   4   1 1950.47   13.56
   4  -4  -1 1910.83   14.90
   4  -4  -1 1879.82   18.25
   4  -4   0   18.62    4.03
   4   4   0   15.28    2.98
   4   4   0   16.25    3.53
  -4  -4   0    9.07    3.52
  -4   4   0   11.87    2.43
   4  -4   0   12.22    3.51
   4  -4   1 1076.74   13.12
  -4  -4  -1 1045.22   11.87
   4   4   1 1078.52   13.64
   4  -4   1 1068.48   13.37
   4   4   1 1073.98   10.40
  -4   4  -1 1031.07    8.62
   4  -4   2  172.72    6.01
  -4   4  -2  179.49    3.78
   4   4   2  183.85    6.74
  -4  -4  -2  175.80    6.00
   4  -4   2  188.61    7.12
   4   4   2  186.80    4.31
  -4  -4  -3  108.96    5.47
   4  -4   3  101.89    4.90
   4   4   3  110.29    6.01
   4   4   3  102.25    2.94
  -4   4  -3   90.99    3.05
   4  -4   3  105.67    6.58
  -4  -4  -4  634.94   11.27
   4  -4   4  575.85    9.16
   4   4   4  594.79   10.70
   4   4   4  575.86   11.51
  -4   4  -4  554.71    9.09
   4  -4   4  572.13   12.27
   4   4   4  570.88    5.10
  -4   4  -4  587.54    7.09
   4  -4   5 1236.92   11.54
   4   4   5 1223.61   15.94
  -4   4  -5 1169.43   12.66
   4   4   5 1225.19   16.75
   4  -4   5 1206.87   17.82
   4  -4   6    7.56    3.03
   4   4   6   -0.68    5.18
  -4   4  -6    1.33    3.11
   4  -4   6   12.60    6.29
   4   4   7 1497.18   20.03
   4  -4   7 1490.79   15.63
   4   4   7 1502.74   20.12
  -4   4  -7 1495.46   13.91
   4   4   8  213.54    9.51
   4  -4   8  207.55    7.24
   4   4   8  193.35    9.13
   4  -4   8  229.16   10.47
   4   4   9  677.87   15.49
   4  -4   9  640.12   12.54
   4  -4   9  647.50   15.59
   4   4   9  684.21   15.18
   4   4  10  219.21   10.68
   4  -4  10  234.12    8.84
   4   4  10  224.11   10.09
   4  -4  10  249.03   11.19
   4  -4  11   21.08    5.90
   4   4  11   25.72    6.67
   4   4  12  320.48   13.17
   4  -4  12  340.52   11.83
   4  -4  12  317.18   13.45
   4   4  12  347.80   12.73
   4   4  13  166.70   11.61
   4   4  13  177.56   10.82
   4  -4  13  149.00   11.26
   4   4  14    1.51    8.56
   4   4  14  -10.52    6.84
   4  -4  14    7.63    7.58
   4   4  15  223.33   13.98
   4  -4  15  232.68   12.60
   4   4  16   -4.89    9.21
   4  -4  16   14.34    7.51
  -4   5  16  180.58   13.87
  -4  -5  16  135.53   12.70
  -4   5  15    6.47    9.39
  -4  -5  15   12.39    9.16
  -4  -5  14  186.56   13.31
  -4   5  14  150.71   12.59
   4   5 -14  166.59   11.14
  -4   5  13   56.43    9.48
   4   5 -13   58.94    8.67
  -4  -5  13   60.89    9.84
   4  -5 -13   65.33    8.68
  -4  -5  12   47.89    8.77
  -4   5  12   52.33    9.48
   4   5 -12   54.59    8.58
   4   5 -11  120.79    9.23
   4  -5 -11  118.18    9.82
  -4   5  11  120.04    9.98
  -4  -5  11  101.36    9.48
  -4   5  10  562.59   15.69
   4   5 -10  582.62   15.13
   4  -5 -10  582.13   15.50
  -4  -5  10  580.46   15.51
  -4  -5   9  130.68    8.83
  -4   5   9  131.96    8.98
   4   5  -9  164.54    9.51
   4  -5  -9  153.04    9.97
  -4  -5   8  623.83   14.16
   4  -5  -8  616.73   15.02
  -4   5   8  604.89   14.18
   4   5  -8  593.86   14.14
  -4  -5   8  630.57   10.21
  -4  -5   7  267.71    9.81
   4   5  -7  261.61   10.03
  -4   5   7  261.12    9.42
  -4  -5   7  270.69    7.03
   4  -5  -7  274.30   10.73
  -4  -5   6 2233.31   22.65
   4   5  -6 2262.83   23.36
  -4   5   6 2207.17   22.12
   4  -5  -6 2294.46   25.53
   4   5  -5  174.89    5.69
  -4  -5   5  179.17    7.85
   4   5  -5  162.66    7.68
  -4  -5   5  178.48    5.83
  -4   5   5  164.57    6.81
   4  -5  -5  168.64    8.79
  -4  -5   4  268.29    8.73
   4   5  -4  271.89    8.56
   4   5  -4  268.45    6.70
  -4   5   4  261.25    7.34
   4  -5  -4  256.44    9.44
   4   5  -3 1837.25   15.58
   4  -5  -3 1864.55   11.69
  -4  -5   3 1824.14   17.89
   4   5  -3 1805.26   17.94
   4  -5  -3 1859.42   20.18
  -4   5   3 1802.58   15.81
  -4   5   2  706.58    9.18
   4  -5  -2  721.58   12.58
   4   5  -2  714.74   10.36
   4  -5  -2  738.64    9.15
   4   5  -2  750.08   11.25
  -4  -5   2  725.35   11.34
   4  -5  -1    8.25    4.60
   4  -5  -1    6.13    3.30
   4  -5   0 2115.60   19.37
   4   5   0 2162.64   18.67
  -4   5   0 2094.05   12.66
  -4  -5   0 2113.97   17.25
   4  -5   0 2060.88   17.74
   4   5   0 2120.93   16.01
   4  -5   1  185.88    6.78
   4   5   1  214.70    7.06
  -4   5  -1  194.03    3.94
   4  -5   1  189.03    6.86
   4   5   1  206.17    5.10
  -4  -5  -1  206.36    6.38
   4  -5   2  901.25   12.38
   4   5   2  943.04   13.75
  -4  -5  -2  931.73   12.25
  -4   5  -2  909.04    7.26
   4  -5   2  978.89   14.03
   4   5   2  926.91    8.98
   4  -5   3  525.74    9.51
  -4   5  -3  538.74    5.73
   4   5   3  539.58   11.05
   4   5   3  520.01    6.16
  -4   5  -3  541.60    9.71
   4  -5   3  561.61   11.68
  -4  -5  -3  535.86   10.16
   4   5   4  310.51    8.47
  -4   5  -4  298.88    7.72
   4   5   4  305.24    9.15
  -4   5  -4  303.10    4.91
   4  -5   4  298.13    9.78
   4   5   4  287.80    4.18
  -4  -5  -4  289.77    8.70
   4  -5   5  636.75    7.80
   4   5   5  656.25   12.54
   4   5   5  648.75   12.93
   4  -5   5  668.05   14.11
  -4   5  -5  585.16    7.57
  -4   5  -5  617.95   10.20
   4  -5   6 1409.52   12.99
   4   5   6 1407.99   18.73
   4   5   6 1342.12   18.63
  -4   5  -6 1394.14   14.81
   4  -5   6 1381.08   19.92
   4  -5   7   20.44    3.59
   4   5   7   26.37    5.91
   4   5   8  654.17   14.98
  -4   5  -8  601.93    9.85
   4  -5   8  590.27   10.80
   4   5   8  672.95   14.60
   4  -5   8  635.50   15.24
   4   5   9   86.96    8.37
   4   5   9   79.89    7.52
   4  -5   9   82.77    5.84
   4  -5   9  105.02    9.14
   4   5  10   78.58    8.63
   4  -5  10   73.48    6.17
   4   5  10   77.33    7.70
   4  -5  10   79.77    9.15
   4   5  11  109.53    9.88
   4  -5  11   95.26    6.94
   4   5  11  121.78    9.02
   4  -5  11  105.55    9.84
   4   5  12  189.09   11.77
   4   5  12  197.14   10.80
   4  -5  12  161.76   11.22
   4   5  13   54.24    9.10
   4   5  13   54.95    8.16
   4   5  14  300.10   14.48
   4   5  14  318.93   13.10
   4  -5  14  302.55   13.76
   4   5  15    4.15    9.06
   4   5  16  107.49   11.86
   4  -5  16  101.75   10.34
  -4  -6  16   17.44   10.00
  -4  -6  15    4.78    9.97
   4   6 -14   66.52    9.26
  -4  -6  14   49.22   10.14
  -4  -6  13   25.67    8.56
   4   6 -13   16.63    7.92
  -4   6  13    8.64    9.02
  -4   6  12  652.50   18.39
   4   6 -12  655.88   17.70
  -4  -6  12  696.83   18.74
   4  -6 -12  710.49   17.80
   4   6 -11   -6.17    7.14
  -4   6  11   14.31    8.00
  -4  -6  11   -2.68    7.59
   4  -6 -11    3.21    7.72
  -4   6  10  431.95   14.27
   4   6 -10  450.65   13.73
  -4  -6  10  464.93   14.34
   4  -6 -10  451.20   14.50
  -4  -6   9   81.48    7.78
   4   6  -9   77.10    8.21
  -4   6   9   61.06    7.93
  -4  -6   9   68.04    5.13
   4  -6  -9   57.76    8.13
  -4  -6   8   29.47    6.68
   4   6  -8   23.22    6.38
  -4  -6   8   21.83    4.11
  -4  -6   7    1.02    3.76
  -4  -6   7    3.06    5.92
  -4   6   7    0.33    5.26
   4  -6  -7   -1.52    7.08
  -4  -6   6  653.29   13.51
   4   6  -6  656.65   13.65
  -4   6   6  654.75   12.94
   4  -6  -6  644.29   14.64
  -4  -6   6  646.37   10.58
   4  -6  -5    5.58    6.32
  -4   6   5    8.15    4.11
   4   6  -5    5.44    3.57
   4   6  -4 5043.13   27.17
   4  -6  -4 4804.71   15.60
  -4  -6   4 4970.15   31.26
   4   6  -4 4732.33   30.67
  -4   6   4 4811.09   28.32
   4  -6  -4 4893.70   34.04
   4  -6  -3   -2.98    5.50
  -4   6   3   -1.73    3.21
   4   6  -3    2.51    3.29
  -4  -6   3    1.84    4.87
   4   6  -3    2.06    4.45
   4  -6  -2  167.60    7.64
   4   6  -2  180.21    6.18
  -4  -6   2  177.12    7.05
   4  -6  -2  166.36    5.43
   4   6  -2  174.94    6.40
  -4   6   2  172.12    5.16
   4  -6  -1   36.33    5.23
  -4   6   1   34.77    2.80
  -4  -6   1   37.48    4.76
   4   6  -1   24.58    4.03
   4   6  -1   34.41    3.82
   4  -6  -1   33.16    4.13
   4  -6   0   71.42    5.70
  -4   6   0   71.73    2.91
   4   6   0   64.21    4.85
  -4  -6   0   65.12    5.02
   4   6   0   70.27    4.04
   4  -6   0   62.62    5.02
   4  -6   1   31.49    5.06
   4   6   1   28.99    4.75
  -4   6  -1   22.75    1.92
  -4  -6  -1   26.49    4.52
   4  -6   1   33.28    5.12
   4   6   1   27.27    3.10
   4  -6   2 4596.17   28.47
   4   6   2 4574.60   29.79
  -4  -6  -2 4379.51   26.88
  -4   6  -2 4724.01   28.76
  -4   6  -2 4432.64   14.35
   4   6   2 4491.99   20.38
   4  -6   2 4551.20   29.50
  -4   6  -3  341.79    4.15
   4   6   3  368.13    9.90
   4  -6   3  354.32   10.27
   4   6   3  337.13    5.49
  -4   6  -3  356.15    8.97
  -4  -6  -3  320.86    8.54
   4   6   4 2493.70   12.96
   4   6   4 2490.76   23.90
   4   6   4 2526.37   22.37
  -4   6  -4 2432.06   20.64
   4  -6   4 2464.37   24.23
  -4  -6  -4 2526.19   22.82
   4   6   5    9.06    5.44
  -4   6  -5   11.26    2.16
  -4   6  -5   11.75    4.02
   4   6   5   12.60    1.66
   4  -6   5    9.60    6.34
   4   6   6  739.81   14.47
   4  -6   6  718.56    8.84
   4   6   6  709.60   14.37
   4  -6   6  766.54   15.99
  -4   6  -6  736.79   11.79
   4  -6   7   20.69    3.24
   4   6   7   12.76    5.84
   4  -6   7   16.34    7.17
  -4   6  -7   13.97    3.80
   4  -6   8  242.23   11.11
   4   6   8  221.35   10.07
   4  -6   8  221.43    6.83
   4   6   8  249.13   10.14
  -4   6  -8  221.02    7.11
   4  -6   9    1.74    7.28
   4   6   9    3.87    6.59
   4  -6   9    3.83    3.70
   4   6   9    6.16    6.21
   4  -6  10  446.13   14.88
   4   6  10  455.76   14.68
   4   6  10  451.08   13.44
   4  -6  11    5.89    7.97
   4   6  11   -7.25    7.99
   4   6  11    2.14    6.47
   4   6  12  610.03   17.83
   4   6  12  584.95   15.84
   4  -6  12  575.81   17.39
   4   6  13   21.74    8.62
   4  -6  13   12.92    8.33
   4   6  14   -1.66    8.45
   4   6  14    3.99    6.97
   4  -6  14   11.08    8.86
   4   6  15   19.91    9.85
   4  -6  15    2.35    8.13
   4   6  16   44.57   10.61
   4  -6  16   17.91    7.98
  -4  -7  16  175.49   13.79
  -4   7  15    7.62    9.89
  -4  -7  15   15.20   10.03
  -4  -7  14  141.05   12.47
   4   7 -14  143.07   11.52
  -4   7  13  133.09   11.60
   4   7 -13  114.82   10.90
  -4  -7  13  145.92   11.70
   4  -7 -13  120.07   10.00
  -4   7  12   66.04    9.82
   4   7 -12   68.56    8.94
  -4  -7  12   70.69    9.73
  -4   7  11   50.43    8.96
   4   7 -11   56.90    8.22
   4  -7 -11   49.38    8.58
  -4  -7  11   56.92    8.72
   4   7 -10  237.76   11.30
  -4   7  10  250.04   11.55
   4  -7 -10  269.60   12.20
  -4  -7  10  285.51   12.16
  -4  -7   9   86.99    8.39
  -4   7   9   69.21    8.04
   4   7  -9   82.97    8.19
  -4  -7   9   82.44    5.80
   4  -7  -9   62.44    8.55
  -4  -7   8  688.96   15.01
  -4   7   8  672.94   15.07
   4   7  -8  671.13   15.40
  -4  -7   8  697.37   12.22
   4  -7  -8  703.34   16.50
  -4   7   7   97.62    7.47
  -4  -7   7   97.98    7.56
   4   7  -7   96.32    7.87
  -4  -7   7  110.88    6.07
   4  -7  -7  116.85    8.87
  -4  -7   6 1066.76   16.55
   4   7  -6 1000.15   16.74
  -4   7   6 1044.27   16.12
   4  -7  -6 1058.15   18.03
  -4  -7   6 1080.70   14.14
  -4  -7   5  646.31   11.02
   4   7  -5  654.68   11.05
   4   7  -5  590.16   12.62
  -4  -7   5  628.83   12.93
  -4   7   5  623.24   12.11
   4  -7  -5  613.14   14.00
   4   7  -4   61.13    4.76
  -4  -7   4   70.14    6.99
   4  -7  -4   59.96    3.24
   4   7  -4   66.32    6.34
  -4   7   4   54.33    4.62
   4  -7  -4   58.95    7.03
   4  -7  -3 1279.89   17.95
   4   7  -3 1292.70   14.93
   4  -7  -3 1203.47   11.65
   4   7  -3 1261.48   15.75
  -4  -7   3 1266.28   16.09
  -4   7   3 1307.98   14.10
   4   7  -2  671.54   11.15
   4  -7  -2  657.71    9.87
  -4   7   2  698.85    9.54
   4   7  -2  686.43   11.12
  -4  -7   2  697.96   11.92
   4  -7  -1    6.37    5.08
   4  -7  -1    0.92    3.97
   4   7  -1    4.69    3.76
  -4  -7   1    6.65    4.50
   4  -7   0 1961.14   20.30
   4   7   0 1964.41   19.16
  -4  -7   0 1950.73   18.04
   4   7   0 1956.26   16.28
  -4   7   0 1953.00   11.72
   4  -7   0 1920.50   18.08
   4  -7   1    1.71    4.71
   4   7   1   12.11    3.08
   4   7   1    8.41    4.29
  -4   7  -1    9.27    4.64
  -4  -7  -1    3.86    4.56
   4  -7   1   10.46    4.71
  -4   7  -1   11.56    1.62
  -4   7  -2  216.05    2.60
   4   7   2  227.09    8.08
  -4  -7  -2  237.35    7.92
   4   7   2  231.88    5.46
  -4   7  -2  255.36    8.55
   4  -7   2  256.31    8.69
   4   7   3 1022.20   15.80
   4  -7   3 1019.75   15.72
  -4   7  -3 1030.77   14.65
  -4  -7  -3  965.57   14.32
   4   7   3 1008.97    9.65
  -4   7  -4   26.44    1.64
  -4   7  -4   31.73    4.77
   4   7   4   25.89    2.56
  -4  -7  -4   26.68    5.66
   4   7   5   81.14    7.05
  -4   7  -5   89.62    2.75
  -4   7  -5   76.21    5.59
   4   7   5   91.03    3.07
   4  -7   5   88.01    8.00
   4  -7   6 1728.51   12.08
   4   7   6 1741.68   21.70
   4   7   6 1731.33   22.11
   4  -7   6 1807.55   23.22
   4  -7   7   38.77    3.28
   4   7   7   32.22    6.50
   4   7   7   49.59    7.06
   4  -7   7   39.37    7.75
  -4   7  -7   39.78    4.73
   4   7   8  405.75   12.69
   4   7   8  382.65   12.06
  -4   7  -8  385.38    9.53
   4  -7   8  381.67   13.29
   4   7   9  154.00    9.47
   4   7   9  142.95    9.36
   4  -7   9  153.16   10.55
   4   7  10   86.74    9.03
   4   7  10  108.64    8.81
   4  -7  10   75.89    9.38
   4   7  11  356.41   14.10
   4   7  11  374.37   13.26
   4  -7  11  330.76   14.06
   4   7  12  126.27   11.05
   4   7  12  130.05    9.84
   4  -7  12  130.92   11.02
   4   7  13   62.59   10.17
   4   7  13   50.87    8.02
   4  -7  14  298.72   14.88
   4   7  14  310.58   14.98
   4   7  14  350.59   13.75
   4   7  15   -3.07    9.60
   4  -7  15   -7.96    8.83
  -4   8  15  188.64   13.69
   4   8 -15  169.98   11.88
  -4   8  14   18.64    9.18
   4   8 -14    3.65    8.57
  -4  -8  14   23.73    9.29
   4   8 -13  113.79   10.58
  -4  -8  13  117.83   11.15
  -4   8  13  106.19   10.69
  -4   8  12  156.05   11.58
   4   8 -12  165.38   11.54
  -4  -8  12  197.45   12.09
   4  -8 -12  183.78   11.51
  -4  -8  11   35.35    8.19
  -4   8  11   47.28    9.15
   4   8 -11   39.51    8.37
   4  -8 -11   26.76    8.36
   4  -8 -10  127.05   10.05
  -4   8  10  143.57    9.92
   4   8 -10  125.32    9.88
  -4  -8  10  144.65    9.97
  -4   8   9  392.06   13.32
  -4  -8   9  411.95   13.22
   4   8  -9  410.34   13.51
  -4  -8   9  428.55   10.77
   4  -8  -9  428.97   14.07
  -4  -8   8   35.48    6.73
  -4  -8   8   29.04    5.06
  -4  -8   7 1351.16   19.70
  -4   8   7 1374.91   19.87
   4   8  -7 1276.00   19.73
  -4  -8   7 1330.69   16.83
   4  -8  -7 1292.52   20.96
  -4  -8   6   86.09    7.63
  -4   8   6   85.10    6.59
   4  -8  -6   70.92    7.85
  -4  -8   6   73.47    5.71
  -4   8   5  199.14    7.76
  -4  -8   5  194.54    7.36
   4   8  -5  207.03    7.42
   4   8  -5  215.10    8.93
   4  -8  -5  202.92    9.72
   4  -8  -4  376.72   11.53
  -4   8   4  378.13    9.12
   4   8  -4  369.12    9.08
  -4  -8   4  359.35   10.38
   4  -8  -4  364.80    6.67
   4   8  -4  364.26    9.95
   4  -8  -3  494.30   12.39
   4   8  -3  497.96   10.34
   4  -8  -3  470.03    8.28
   4   8  -3  499.61   10.75
  -4   8   3  487.39    9.33
  -4  -8   3  487.11   11.04
  -4  -8   2   62.73    6.10
   4  -8  -2   48.24    6.33
   4   8  -2   65.49    5.19
   4  -8  -2   66.77    4.78
   4   8  -2   69.00    5.21
  -4   8   2   62.23    4.09
   4  -8  -1 1594.72   19.34
   4   8  -1 1565.44   17.35
  -4  -8   1 1565.08   17.02
   4   8  -1 1562.28   15.96
  -4   8   1 1589.37   12.66
   4  -8  -1 1605.84   16.33
   4  -8   0   11.34    5.32
   4   8   0   30.30    5.05
  -4  -8   0   26.59    5.11
  -4   8   0   23.06    2.19
   4   8   0   20.64    3.71
   4  -8   0   23.20    4.75
   4   8   1 1199.82   12.61
   4   8   1 1224.82   16.30
   4  -8   1 1216.76   15.85
  -4  -8  -1 1152.45   14.81
   4  -8   2 1615.23   19.07
   4   8   2 1633.48   19.24
  -4  -8  -2 1541.96   17.50
   4   8   2 1641.88   13.79
  -4   8  -2 1718.99   19.73
   4   8   3  143.82    7.58
  -4   8  -3  138.19    7.25
   4   8   3  134.09    4.51
   4  -8   3  129.81    8.15
  -4  -8  -3  127.75    7.06
   4   8   4  900.47   15.75
  -4  -8  -4  951.87   15.50
  -4   8  -4  931.90   14.60
   4   8   4  922.12    9.71
   4  -8   4  928.30   16.24
   4   8   5 1342.95   18.74
  -4  -8  -5 1369.41   19.64
   4   8   5 1346.61   19.55
  -4   8  -5 1286.27   17.22
   4   8   5 1329.67   10.88
   4  -8   5 1344.50   19.86
   4   8   6  202.97    9.55
  -4   8  -6  189.16    7.70
   4  -8   6  211.34   10.29
   4   8   7  607.63   14.80
   4   8   7  586.40   14.37
  -4   8  -7  582.87   12.16
   4   8   8    8.05    6.58
   4   8   8   11.79    6.04
  -4   8  -8    7.76    4.30
   4  -8   8    5.42    7.73
   4   8   9  576.12   15.73
   4   8   9  611.60   15.74
   4  -8   9  565.02   16.53
   4   8  10  144.85   10.65
   4   8  10  128.38    9.67
   4  -8  10  116.83   10.65
   4   8  11   40.65    8.16
   4   8  12   33.13    7.68
   4   8  13  147.95   12.40
   4   8  13  156.53   10.65
   4  -8  13  138.23   12.06
   4   8  14    0.54    9.46
   4  -8  14    2.84    8.97
   4   8  15  221.39   14.48
   4  -8  15  167.84   12.49
  -4   9  15   14.17   10.08
   4   9 -15    1.32    8.55
  -4  -9  15   12.37    9.73
  -4   9  14    8.09    9.24
   4   9 -14   -0.97    8.82
  -4  -9  14   10.07    9.31
   4   9 -13  286.99   14.33
  -4  -9  13  307.99   14.70
  -4  -9  12   10.91    8.68
  -4   9  12   -8.34    8.80
   4   9 -12   -0.16    8.32
  -4   9  11  637.37   17.67
   4   9 -11  612.63   17.51
   4  -9 -11  626.23   17.42
  -4  -9  11  593.63   17.40
  -4  -9  10    5.33    5.42
  -4  -9  10   12.48    7.25
   4   9 -10  -11.47    7.64
  -4   9  10   19.62    7.51
   4  -9 -10   -1.08    7.62
  -4   9   9  344.02   12.45
  -4  -9   9  373.01   12.50
   4   9  -9  385.72   13.81
  -4  -9   9  339.58   10.52
   4  -9  -9  391.71   14.27
   4  -9  -8   19.76    7.14
  -4  -9   8    3.43    5.30
  -4  -9   8   14.10    6.84
   4   9  -8    5.21    6.98
  -4   9   8   14.43    6.18
  -4  -9   7  291.43   10.61
  -4   9   7  274.40   10.30
   4   9  -7  312.23   11.37
  -4  -9   7  295.37    9.37
   4  -9  -7  280.32   11.64
   4  -9  -6    3.82    6.92
  -4  -9   6    3.00    4.58
  -4  -9   6    4.67    5.95
   4   9  -6    9.10    6.17
  -4   9   6    2.46    4.83
  -4  -9   5 1182.66   16.15
   4   9  -5 1140.15   15.59
  -4  -9   5 1103.35   17.13
  -4   9   5 1148.90   16.18
   4   9  -5 1109.10   17.56
   4  -9  -5 1108.87   18.57
   4  -9  -4   19.53    6.53
   4   9  -4   10.98    5.31
   4  -9  -3 2296.99   25.02
   4   9  -3 2287.39   21.61
  -4   9   3 2381.10   19.61
   4  -9  -3 2277.81   18.06
   4   9  -3 2289.68   22.36
  -4  -9   3 2278.46   22.23
   4   9  -2    8.77    4.47
  -4  -9   2   21.46    5.58
  -4   9   2   13.81    3.19
   4   9  -2   19.90    4.70
   4  -9  -1   72.54    7.02
   4   9  -1   68.05    5.90
  -4  -9   1   61.41    5.95
  -4   9   1   62.21    3.27
   4   9  -1   69.78    5.06
   4  -9  -1   70.95    5.74
   4  -9   0    5.93    5.07
   4  -9   0   10.88    5.65
   4   9   0   12.10    4.97
  -4   9   0    9.00    5.46
  -4  -9   0    6.86    5.01
   4   9   1  548.95   11.91
  -4   9  -1  575.47   12.74
  -4  -9  -1  519.73   10.99
   4   9   1  547.38    9.18
   4  -9   1  573.56   11.88
  -4  -9  -2   17.80    5.38
  -4   9  -2   13.88    5.35
   4  -9   2   11.21    5.69
   4   9   3 2456.37   24.86
  -4  -9  -3 2398.46   23.20
  -4   9  -3 2539.52   24.80
   4   9   3 2485.93   17.42
   4  -9   3 2412.60   24.62
   4   9   4   16.37    2.93
   4   9   4   21.97    6.15
  -4   9  -4    5.75    5.23
   4  -9   4   16.10    6.75
  -4  -9  -4   10.28    5.98
   4   9   5 1486.59   20.14
   4   9   5 1431.98   20.41
  -4   9  -5 1467.12   18.93
   4   9   5 1497.34   12.69
   4  -9   5 1534.95   21.74
   4   9   6    3.17    6.06
   4   9   6   -2.36    6.24
  -4   9  -6    7.86    4.61
   4  -9   6    2.22    7.07
   4   9   7   10.67    5.95
  -4   9  -7   11.44    4.93
   4  -9   7    9.92    7.77
   4   9   8   45.51    7.81
  -4   9  -8   44.56    5.78
   4   9   8   38.90    6.88
   4  -9   8   45.36    8.65
   4   9   9  220.89   11.49
   4   9   9  241.25   11.11
   4  -9   9  246.94   12.67
   4   9  10   -1.35    8.13
   4   9  10    2.32    6.74
   4  -9  10    0.03    9.10
   4   9  11  631.40   18.10
   4  -9  11  611.17   18.35
   4   9  12   -0.87    8.93
   4   9  12    3.86    7.17
   4  -9  12   -3.95    9.69
   4   9  13  131.68   12.07
   4   9  13  132.65    9.77
   4  -9  13  100.01   11.20
   4   9  14    2.85    9.45
   4  -9  15    4.07    9.33
  -4  10  15  139.98   12.51
   4  10 -15  131.07   11.80
  -4 -10  15  157.46   13.05
  -4  10  14   11.42    9.01
   4  10 -14   -3.04    8.43
  -4 -10  14    6.85    8.86
  -4  10  13  162.07   12.34
   4  10 -13  139.59   11.94
  -4 -10  13  134.70   11.91
   4 -10 -12  152.65   11.55
   4  10 -12  146.02   11.78
  -4  10  12  185.96   12.32
  -4 -10  12  172.37   11.93
  -4  10  11   34.17    8.59
   4 -10 -11   28.39    8.59
  -4 -10  10   60.82    8.24
   4  10 -10   52.20    8.80
  -4 -10  10   53.65    7.11
   4 -10 -10   39.18    8.75
  -4 -10   9  261.24   11.45
  -4  10   9  263.71   11.56
   4  10  -9  274.00   12.34
  -4 -10   9  253.31   10.11
   4 -10  -9  269.02   12.29
  -4 -10   8   -6.06    5.80
   4 -10  -8    3.49    7.59
  -4 -10   8    0.07    6.27
  -4  10   8    2.61    5.81
   4  10  -8    1.35    7.05
  -4 -10   7  627.85   14.69
  -4  10   7  646.56   14.70
  -4 -10   7  633.29   13.70
   4 -10  -7  628.85   15.50
   4  10  -7  662.18   15.67
  -4  10   6  449.11   11.75
  -4 -10   6  413.37   12.19
   4  10  -6  416.51   12.43
   4 -10  -6  447.53   13.50
  -4 -10   6  412.69   11.34
   4 -10  -5  213.41   10.21
  -4 -10   5  211.96    8.37
  -4 -10   5  190.60    9.10
  -4  10   5  207.69    8.10
   4  10  -5  206.09    9.37
   4 -10  -4  652.39   15.05
   4  10  -4  692.09   13.26
  -4 -10   4  668.11   13.49
   4  10  -4  672.83   13.67
  -4  10   4  667.94   11.88
   4 -10  -4  672.99   10.15
   4 -10  -3  651.77   14.83
   4  10  -3  674.41   13.00
   4  10  -3  670.47   12.93
  -4  10   3  701.11   11.03
   4 -10  -3  658.62   10.88
  -4 -10   3  657.15   13.18
  -4 -10   2  451.12   10.87
   4 -10  -2  437.45   12.17
   4  10  -2  462.81   10.92
  -4  10   2  435.85    7.86
   4  10  -2  475.92   10.77
   4 -10  -2  452.24    9.85
   4 -10  -1  906.24   16.57
   4  10  -1  912.27   14.74
  -4 -10   1  944.95   14.52
  -4  10   1  964.84   16.81
  -4  10   1  926.64    9.11
   4  10  -1  948.50   13.66
   4 -10  -1  919.77   13.91
   4 -10   0   10.59    5.48
   4  10   0    9.90    3.94
   4  10   0    6.05    4.97
   4  10   1 1590.35   15.89
   4  10   1 1586.37   19.74
   4 -10   1 1607.37   19.43
  -4 -10  -1 1536.81   18.19
  -4 -10  -2  313.94    9.71
  -4  10  -2  325.25   10.55
   4  10   2  315.02   10.33
   4 -10   2  293.87   10.36
   4  10   2  313.84    7.46
   4  10   3    2.76    3.24
   4  10   3   -1.62    5.60
  -4 -10  -3    4.40    5.92
   4 -10   3   -1.73    6.35
  -4 -10  -4  200.28    9.34
   4  10   4  199.57    9.24
  -4  10  -4  210.71    9.02
   4  10   4  203.51    5.82
   4 -10   4  208.86    9.89
   4  10   5  620.72   14.10
   4  10   5  635.09   14.50
   4 -10   5  640.87   15.45
   4  10   5  638.86    9.16
  -4 -10  -5  647.94   14.72
  -4  10  -5  583.48   13.13
   4  10   6   36.23    7.03
   4  10   6   40.11    7.10
  -4  10  -6   38.26    6.00
  -4  10  -7  692.42   14.57
   4  10   7  746.55   16.94
   4  10   7  684.86   15.91
   4 -10   7  695.79   16.95
  -4  10  -8   50.07    6.15
   4  10   8   62.52    8.72
   4  10   8   55.95    7.51
   4 -10   8   46.74    8.90
   4  10   9  397.93   14.36
   4  10   9  386.20   13.16
   4 -10   9  360.66   14.47
  -4  10  -9  402.05   11.75
   4  10  10  305.15   13.50
   4  10  10  330.11   12.86
   4 -10  10  290.23   14.24
   4  10  11   16.19    8.70
   4  10  11   -8.54    7.23
   4 -10  11    5.18    9.67
   4  10  12   89.28   10.50
   4  10  12   81.71    8.74
   4 -10  12   88.45   11.24
   4  10  13  170.42   12.96
   4  10  13  159.89   10.46
   4 -10  13  152.01   12.45
   4  10  14    2.63    9.52
   4 -10  15   67.94   10.59
   4  11 -15    0.30    8.99
  -4 -11  15    3.78    9.31
   4  11 -14  138.07   12.07
  -4 -11  14  152.15   12.42
   4  11 -13   47.49    9.90
  -4 -11  13   59.22    9.84
  -4 -11  12    5.46    8.21
   4  11 -12    8.39    8.33
   4 -11 -12    6.33    8.23
   4  11 -11  149.01   10.99
   4 -11 -11  157.23   11.51
  -4  11  11  153.83   10.80
  -4 -11  11  139.42   10.75
  -4  11  10   77.36    9.02
  -4 -11  10   90.82    9.13
   4  11 -10   87.23    9.91
  -4 -11  10   84.03    8.00
   4 -11 -10   80.35   10.17
  -4 -11   9   34.90    7.14
   4  11  -9   41.76    8.73
  -4  11   9   42.75    7.32
   4 -11  -9   46.59    8.30
  -4 -11   9   30.52    6.68
  -4 -11   8 1157.98   20.23
   4  11  -8 1118.39   21.20
  -4  11   8 1109.52   19.69
  -4 -11   8 1152.61   18.76
   4 -11  -7   -0.51    7.10
  -4 -11   7    6.02    6.20
  -4  11   7    5.09    5.75
  -4 -11   7   -0.42    6.58
   4  11  -7   -0.40    6.91
  -4 -11   6  144.80    8.88
  -4  11   6  140.20    7.52
   4  11  -6  140.05    9.31
  -4 -11   6  133.22    8.23
   4 -11  -6  124.85    9.15
   4 -11  -5  487.75   14.00
  -4 -11   5  500.42   12.45
  -4 -11   5  473.10   12.82
   4  11  -5  489.93   13.08
  -4  11   5  478.13   11.08
   4 -11  -4  179.94    9.80
   4  11  -4  165.87    8.09
  -4  11   4  171.67    6.68
  -4 -11   4  168.80    8.68
   4 -11  -4  158.60    6.39
   4  11  -4  164.16    8.70
   4 -11  -3  213.15   10.31
   4  11  -3  190.11    8.22
  -4  11   3  222.02    6.81
   4  11  -3  209.43    8.69
   4 -11  -3  218.56    7.42
  -4 -11   3  227.12    9.23
  -4 -11   2 1666.66   19.81
   4  11  -2 1691.90   20.51
   4 -11  -2 1639.44   18.13
  -4  11   2 1760.84   14.91
   4  11  -2 1698.25   19.44
   4 -11  -2 1704.70   22.54
   4 -11  -1   47.94    7.77
   4  11  -1   43.29    5.20
   4  11  -1   40.73    6.09
  -4 -11   1   44.22    6.24
  -4  11   1   45.32    7.22
   4 -11  -1   48.26    6.11
   4  11   0 1310.91   18.31
   4  11   0 1360.16   16.08
  -4 -11   0 1311.65   17.19
   4 -11   0 1296.54   17.62
   4  11   1   61.27    6.80
   4  11   1   54.27    4.63
   4 -11   1   52.87    6.70
  -4 -11  -1   64.59    6.67
  -4  11  -1   73.87    7.34
  -4 -11  -2  299.80    9.77
   4  11   2  317.37   10.55
  -4  11  -2  329.06   11.05
   4  11   2  314.25    7.85
   4 -11   2  345.51   10.94
   4  11   3  318.69   10.97
  -4 -11  -3  292.57   10.44
  -4  11  -3  315.50   10.72
   4  11   3  323.46    7.84
   4 -11   3  290.98   11.15
   4  11   4   95.34    7.97
  -4  11  -4   99.98    7.84
   4  11   4  100.75    5.02
   4 -11   4  105.88    8.53
  -4 -11  -4   87.81    7.83
   4  11   5  100.88    8.21
  -4 -11  -5   93.49    8.33
  -4  11  -5   91.25    7.24
   4  11   5   90.17    4.60
   4 -11   5  103.87    8.99
   4 -11   6  893.62   18.59
   4  11   6  909.32   17.81
  -4  11  -6  930.29   17.09
   4  11   6  968.84   18.18
  -4 -11  -6 1006.67   19.23
   4  11   7   19.50    7.54
   4  11   7   -2.49    6.78
   4 -11   7    1.53    8.04
  -4  11  -8  634.82   14.87
   4  11   8  652.88   17.09
   4  11   8  606.33   15.93
   4 -11   8  635.53   17.80
   4  11   9   81.33    9.68
   4  11   9   56.35    8.14
  -4  11  -9   68.48    7.32
   4  11  10   86.96    8.92
   4  11  10   88.22   10.39
   4 -11  10  101.26   11.39
   4  11  11  123.94   11.59
   4  11  11  132.00   10.23
   4 -11  11  108.26   12.00
   4  11  12   53.92    8.17
   4 -11  12   74.55   11.36
   4  11  14  186.70   13.64
   4 -11  14  168.54   13.32
  -4  12  14   51.47   10.46
   4  12 -14   44.68    9.57
  -4 -12  13   -3.50    8.29
  -4  12  13    7.15    8.70
   4  12 -13    3.04    9.17
  -4  12  12  468.70   17.01
   4  12 -12  461.24   17.31
  -4 -12  12  480.34   16.84
  -4 -12  11    5.63    7.73
  -4  12  11    6.52    7.80
   4  12 -11    6.69    8.74
   4 -12 -11   -0.98    8.58
  -4 -12  10  465.34   15.17
  -4 -12  10  444.30   13.94
  -4  12  10  442.31   15.17
   4  12 -10  440.94   16.07
   4 -12 -10  425.51   15.79
   4 -12  -9    2.02    8.03
  -4 -12   9    9.33    7.34
   4  12  -9    4.51    8.09
  -4  12   9   -8.83    6.79
  -4 -12   8  100.65    8.82
  -4  12   8   91.90    8.13
   4  12  -8  103.29    9.74
  -4 -12   8   76.80    8.07
   4 -12  -8   70.30    8.64
   4 -12  -7   11.09    7.21
  -4 -12   7    3.66    6.30
   4  12  -7    5.74    6.94
  -4 -12   7    3.66    6.40
  -4  12   7    1.31    5.56
  -4 -12   6  463.22   12.85
  -4  12   6  481.49   12.13
   4 -12  -6  472.48   14.20
   4  12  -6  475.89   13.76
  -4 -12   6  458.77   12.67
  -4 -12   5    5.44    5.87
   4  12  -5   13.10    6.57
  -4 -12   5    9.12    6.41
   4 -12  -4  585.15   15.00
  -4 -12   4  629.75   13.85
   4  12  -4  634.40   13.69
  -4  12   4  621.43   11.50
  -4 -12   4  611.44   13.59
   4  12  -4  596.35   13.96
   4 -12  -4  602.20   11.09
   4  12  -3    4.76    5.59
   4 -12  -3   -1.53    4.48
  -4  12   3    3.72    3.04
   4  12  -3    9.63    5.71
  -4 -12   2  557.05   12.47
   4 -12  -2  568.92   14.73
   4  12  -2  595.00   13.42
   4  12  -2  573.39   12.40
   4 -12  -2  612.96   12.26
   4 -12  -1    5.61    6.85
   4  12  -1    3.67    5.64
  -4  12   1    2.84    6.72
   4 -12  -1   13.51    5.51
  -4 -12   1   12.29    5.89
   4  12   0  401.55   11.65
  -4 -12   0  391.33   10.85
   4 -12   0  415.23   11.39
   4  12   0  403.13   10.06
   4  12   1   31.68    6.42
   4  12   1   40.48    4.60
   4 -12   1   39.85    6.90
  -4 -12  -1   38.65    6.22
  -4  12  -1   39.14    7.23
  -4 -12  -2 1407.95   19.10
   4  12   2 1414.16   20.42
   4 -12   2 1492.91   20.72
  -4  12  -2 1529.23   21.82
   4  12   2 1413.91   16.37
   4  12   3   58.00    7.11
  -4  12  -3   50.58    6.92
  -4 -12  -3   50.64    6.67
   4  12   3   41.87    4.50
   4 -12   3   49.46    7.55
   4  12   4 1941.81   24.74
  -4  12  -4 2023.97   24.87
   4  12   4 2019.96   18.40
   4 -12   4 2052.60   25.69
  -4 -12  -4 2018.97   24.51
  -4 -12  -5   57.97    7.96
  -4  12  -5   45.08    7.15
   4  12   5   66.13    7.74
   4  12   5   43.47    4.21
   4 -12   5   60.74    8.73
   4  12   6  225.31   10.73
   4  12   6  220.27   10.49
  -4  12  -6  203.36    9.74
  -4 -12  -6  233.42   11.54
   4 -12   6  212.96   11.77
   4  12   8    6.32    7.97
   4  12   8    7.07    7.06
   4 -12   8   19.24    8.59
   4  12   9    1.53    8.10
   4  12   9    9.71    7.24
  -4  12  -9   -1.50    6.12
   4 -12   9   16.82    9.32
   4  12  10  661.14   19.06
   4 -12  10  670.85   20.07
   4  12  11    1.18    9.09
   4  12  11   -4.97    7.38
   4 -12  11   -8.34    9.94
   4  12  12  129.34   12.29
   4  12  12  124.64    9.95
   4 -12  12  107.26   12.54
   4  12  13    3.65    9.64
   4  12  14   11.40   10.37
   4 -12  14   -4.10   10.50
  -4  13  14  156.61   12.81
   4  13 -14  144.10   12.89
   4  13 -13   22.58    9.65
  -4  13  13   24.38    9.06
  -4 -13  12   -4.88    8.55
  -4  13  12    7.27    8.26
   4  13 -12   -6.68    9.60
  -4  13  11  234.31   12.62
   4  13 -11  264.55   14.43
   4 -13 -11  240.70   13.30
  -4 -13  11  230.25   12.77
  -4 -13  10   92.82    9.59
   4  13 -10   99.54   11.04
  -4  13  10   93.09    9.34
  -4 -13  10   76.62    8.96
   4 -13 -10  106.69   10.48
   4 -13  -9   14.74    8.65
  -4  13   9   36.00    7.60
  -4 -13   8  749.50   17.35
  -4  13   8  766.77   16.97
   4  13  -8  725.23   18.49
  -4 -13   8  713.00   16.92
   4 -13  -8  688.89   17.85
  -4  13   7   44.03    6.68
  -4 -13   7   37.48    7.24
   4  13  -7   50.86    8.20
  -4 -13   7   42.45    7.57
   4 -13  -7   41.07    8.03
   4 -13  -6  189.83   10.82
  -4 -13   6  188.89    9.76
  -4  13   6  195.30    8.54
   4  13  -6  184.91   10.23
  -4 -13   6  216.62   10.55
  -4 -13   5  243.69   10.37
   4 -13  -5  223.44   11.36
  -4  13   5  238.64    8.43
   4  13  -5  217.22   10.43
  -4 -13   5  246.05   10.59
   4 -13  -4   -4.50    7.33
  -4 -13   4    4.20    6.12
  -4 -13   4   -0.42    6.31
   4  13  -4    1.17    5.78
   4  13  -4    2.14    6.27
   4 -13  -4   -0.47    4.38
  -4  13   4    2.56    3.74
   4 -13  -3  185.95   10.31
   4  13  -3  220.04    9.57
   4  13  -3  208.49    9.48
  -4 -13   3  201.83    9.09
   4 -13  -3  196.17    7.98
   4 -13  -2  916.39   18.23
   4  13  -2  873.66   16.37
   4  13  -2  885.23   15.82
  -4  13   2  945.67   18.35
   4 -13  -2  920.34   15.22
  -4 -13   2  891.87   15.77
   4  13  -1   98.89    7.53
  -4 -13   1  113.38    7.77
   4 -13  -1   91.16    7.26
   4  13  -1  101.75    6.98
  -4  13   1  102.93    8.82
   4  13   0 1016.24   17.76
  -4 -13   0 1041.14   16.51
   4  13   0 1062.56   15.86
   4 -13   0 1077.44   17.69
   4  13   1  568.10   14.12
  -4  13  -1  616.26   15.15
   4  13   1  563.55   11.81
  -4 -13  -1  551.48   12.93
   4 -13   1  621.74   14.32
   4 -13   2  492.01   13.62
   4  13   2  454.53   12.99
  -4  13  -2  489.34   14.26
   4  13   2  484.08   10.59
  -4 -13  -2  462.37   12.44
  -4  13  -3  131.56    8.75
   4  13   3  132.02    8.82
  -4 -13  -3  107.75    8.15
   4  13   3  133.81    6.16
   4 -13   3  132.97    9.65
   4  13   4   82.89    8.14
   4  13   4   76.55    5.06
  -4  13  -4   93.25    7.91
  -4 -13  -4   88.84    8.16
   4  13   5  483.86   13.98
  -4  13  -5  476.99   14.02
   4 -13   5  532.51   15.47
  -4 -13  -5  525.44   14.63
   4  13   6  377.95   13.34
  -4 -13  -6  395.09   13.93
  -4  13  -6  377.42   12.76
   4 -13   6  378.96   14.30
   4  13   7   -1.24    8.08
   4  13   7   -1.68    7.24
  -4 -13  -7   -2.91    8.16
  -4  13  -7   13.49    6.96
   4 -13   7   10.31    9.22
   4  13   8  518.28   16.42
   4  13   8  530.58   15.41
  -4  13  -8  508.26   14.88
   4 -13   8  529.90   17.39
   4  13   9  125.36   11.17
   4  13   9  124.75   10.01
  -4  13  -9  104.67    9.09
   4 -13   9  114.52   11.96
   4  13  10    8.34    9.21
   4  13  10   14.22    7.83
   4 -13  10    1.31   10.16
   4  13  11   91.96    9.09
   4  13  11   62.04    9.98
   4 -13  11   96.40   12.49
   4  13  12   61.00   10.37
   4  13  12   64.42    8.60
   4  13  13   54.81   11.26
   4 -13  13   67.87   12.03
   4 -13  14  110.54   13.44
  -4  14  13   73.47   10.48
   4  14 -13   83.06   11.71
  -4  14  12   57.74   10.14
   4  14 -12   69.32   11.51
  -4 -14  11   13.45    8.30
   4 -14 -11    4.49    8.90
  -4  14  10  101.98    9.88
  -4 -14  10  110.68    9.84
  -4 -14  10   88.54    9.43
   4  14 -10  104.93   11.17
   4 -14 -10   95.76   10.40
  -4 -14   9  386.62   13.97
  -4  14   9  382.47   13.80
   4  14  -9  345.13   14.87
  -4 -14   9  342.42   13.80
   4 -14  -9  318.94   14.51
   4 -14  -8    9.48    8.26
  -4  14   8   35.50    7.03
  -4 -14   8   23.79    7.49
   4  14  -8   15.18    8.27
  -4 -14   7  509.84   14.50
  -4  14   7  510.98   13.62
   4  14  -7  502.20   15.86
  -4 -14   7  520.11   14.99
  -4 -14   6   31.72    7.38
   4 -14  -6   35.97    8.03
  -4  14   6   37.53    5.84
  -4 -14   6   36.32    7.18
   4  14  -6   37.55    8.07
  -4 -14   5   90.50    8.77
   4 -14  -5   76.43    9.15
  -4  14   5   83.91    6.07
  -4 -14   5   79.25    8.21
   4  14  -5   82.91    8.55
   4 -14  -4  101.71    9.46
  -4 -14   4  103.25    8.94
   4  14  -4  123.05    8.84
   4  14  -4  104.01    8.61
  -4 -14   4  110.54    8.28
   4 -14  -3  196.21   10.64
   4  14  -3  178.73    9.73
  -4 -14   3  199.26    9.36
   4  14  -3  170.53    9.09
   4 -14  -3  205.70    8.56
   4 -14  -2  107.40    9.34
   4  14  -2   90.61    7.90
   4  14  -2  108.56    7.80
  -4  14   2   91.12    8.93
   4 -14  -2  102.09    7.21
  -4 -14   2   88.91    7.57
   4  14  -1  864.99   17.19
  -4 -14   1  840.76   15.79
  -4  14   1  930.39   18.95
   4  14  -1  891.76   15.74
   4 -14  -1  898.51   16.33
   4  14   0  135.77    8.81
   4  14   0  147.11    7.96
  -4 -14   0  138.73    8.37
  -4  14   0  139.90    9.66
   4 -14   0  141.87    8.82
   4  14   1 1262.18   20.67
  -4 -14  -1 1207.47   18.73
   4  14   1 1239.67   17.54
   4 -14   1 1243.85   20.17
  -4  14  -1 1248.83   21.58
  -4  14  -2  150.19    9.77
   4  14   2  146.36    9.34
   4  14   2  134.38    6.79
   4 -14   2  127.54    9.11
  -4 -14  -2  124.04    8.19
  -4 -14  -3   20.46    6.55
   4  14   3   16.19    7.04
   4  14   3   24.51    4.71
  -4  14  -3   23.90    7.17
   4  14   4  256.81   11.36
   4  14   4  269.74    8.29
  -4 -14  -4  259.40   11.17
   4 -14   4  286.22   12.59
  -4  14  -4  254.46   11.16
   4 -14   5   93.52    9.90
   4  14   5   58.83    8.18
  -4  14  -5   80.44    8.21
  -4 -14  -5   85.71    8.76
   4  14   6   20.31    7.21
  -4  14  -6   15.73    7.25
   4 -14   6   17.34    8.50
   4  14   7  906.22   19.63
  -4 -14  -7  988.99   21.18
  -4  14  -7  961.35   20.14
   4 -14   7  964.72   21.94
   4  14   8   63.22    9.64
   4  14   8   48.20    8.57
   4 -14   8   70.43   11.17
  -4  14  -8   47.40    8.28
  -4 -14  -8   55.15    9.77
   4  14   9  137.90   11.51
   4  14   9  150.39   10.73
  -4  14  -9  159.47   10.43
   4 -14   9  148.09   12.73
   4  14  10   71.53   10.57
   4  14  10   61.75    8.60
   4 -14  10   55.21   11.25
   4  14  11  -17.12    9.80
   4  14  11   -5.74    7.22
   4 -14  11    1.75   11.31
   4  14  12   40.82   10.22
   4  14  13   66.64   11.96
   4 -14  13  102.21   13.44
  -4  15  13  126.67   11.66
   4  15 -13  107.89   13.04
   4  15 -12  -12.38   10.30
  -4  15  12   -7.04    7.96
  -4  15  11  452.27   16.40
  -4 -15  11  402.80   15.53
   4 -15 -11  441.63   16.89
   4 -15 -10   11.86    8.53
  -4 -15  10   -1.31    7.48
  -4  15  10   13.85    7.68
   4  15 -10    3.68    9.40
  -4 -15  10   11.55    8.28
  -4 -15   9  115.21    9.83
   4  15  -9  130.99   11.86
  -4 -15   9  133.83   10.98
   4 -15  -9  123.20   11.09
  -4 -15   8   20.14    8.08
   4 -15  -8   22.01    8.71
   4  15  -8   14.82    8.79
  -4 -15   8    4.80    7.35
   4  15  -7   15.70    8.03
  -4 -15   7    6.91    7.99
   4 -15  -7   13.61    8.50
  -4  15   7    3.76    5.63
   4  15  -6   48.31    9.05
   4 -15  -5  582.77   16.42
  -4 -15   5  567.13   14.93
   4  15  -5  604.63   16.34
  -4 -15   5  592.02   16.07
   4 -15  -4   17.78    7.91
  -4 -15   4   19.33    6.91
   4 -15  -3  554.93   15.86
  -4 -15   3  552.95   15.16
   4  15  -3  570.14   15.03
   4  15  -3  577.51   14.78
  -4 -15   3  567.85   14.09
   4 -15  -3  562.47   13.03
   4 -15  -2    7.67    7.39
   4  15  -2   -1.33    6.69
  -4 -15   2    2.88    6.41
   4 -15  -2    9.66    5.86
  -4  15   1   35.50    7.97
   4  15  -1   32.42    7.04
   4  15  -1   48.27    6.75
   4 -15  -1   36.12    6.99
  -4 -15   1   49.10    7.21
  -4 -15   0   -2.29    6.24
   4  15   0    1.13    6.78
   4  15   0   -2.11    5.58
  -4  15   0   -0.72    7.58
   4 -15   0    0.82    6.82
   4  15   1  669.36   16.26
   4 -15   1  697.88   16.69
  -4 -15  -1  671.69   15.02
   4  15   1  659.28   13.67
  -4  15  -1  698.16   17.28
  -4 -15  -2    1.08    6.33
   4  15   2    8.80    7.01
   4  15   2    6.55    4.70
   4 -15   2    3.64    7.49
  -4 -15  -3 1050.30   18.78
   4  15   3 1061.18   20.27
  -4  15  -3 1111.42   21.17
   4  15   3 1078.25   16.21
   4 -15   3 1096.75   21.16
   4  15   4    4.00    7.13
  -4 -15  -4   -3.32    7.07
  -4  15  -4   -0.08    7.33
   4  15   4    7.84    4.47
   4 -15   4    7.35    8.35
   4  15   5  586.24   15.99
  -4  15  -5  547.65   15.94
  -4 -15  -5  585.57   16.18
   4 -15   5  570.77   16.83
   4  15   6   39.27    8.34
  -4  15  -6   31.69    7.93
  -4  15  -7    9.29    7.30
   4 -15   7    6.09    9.18
  -4 -15  -7   16.28    8.53
   4  15   8    5.81    7.62
  -4 -15  -8    4.44    9.07
   4 -15   8    7.37    9.40
   4  15   9  281.76   14.00
   4  15   9  306.80   13.03
  -4  15  -9  301.17   13.13
  -4 -15  -9  281.06   14.53
   4 -15   9  271.19   15.20
   4  15  10   13.98    9.27
   4 -15  10   -4.84   11.06
  -4 -15 -10   -7.80    9.70
   4 -15  11  211.44   15.03
   4  15  11  218.26   14.46
   4  15  11  206.26   11.75
   4  15  12  -12.27   10.42
   4 -15  13   56.40   12.43
  -4  16  13   20.07    8.10
  -4  16  12   60.48    9.27
   4  16 -12   44.99   10.33
  -4  16  11    2.07    7.48
   4  16 -11    6.00    9.65
  -4 -16  11   -2.12    8.58
   4  16 -10   96.44   11.84
  -4 -16  10   68.05    9.91
   4 -16 -10   86.95   10.89
  -4 -16   9  275.81   12.41
   4  16  -9  327.47   15.96
  -4 -16   9  295.40   14.14
   4 -16  -9  280.08   14.07
  -4 -16   8    0.81    8.24
   4 -16  -8   -6.98    8.93
  -4 -16   8   -0.23    7.45
   4  16  -8   -7.00    8.56
  -4 -16   7  314.96   12.55
   4  16  -7  356.32   14.87
  -4 -16   7  344.52   14.67
   4 -16  -7  329.77   14.15
   4 -16  -6   99.65   10.22
  -4 -16   6   98.76    9.01
   4  16  -6  122.82   10.74
  -4 -16   6  137.01   11.05
   4 -16  -5   64.33    9.36
  -4 -16   5   63.78    8.46
  -4 -16   5   52.02    8.61
  -4 -16   4  327.33   13.64
   4 -16  -4  349.26   14.18
   4  16  -4  359.87   13.31
  -4 -16   3   65.19    9.33
   4 -16  -3   61.96    9.13
   4  16  -3   64.23    8.47
   4  16  -3   83.09    8.72
   4 -16  -3   62.08    7.24
  -4 -16   3   65.01    7.85
   4 -16  -2  109.44   10.02
   4  16  -2   96.69    9.21
  -4  16   2  120.84   10.43
   4 -16  -2   92.43    8.16
   4  16  -2  115.84    8.46
  -4 -16   2  104.46    8.50
  -4 -16   1  930.76   17.65
   4  16  -1  950.27   19.51
   4  16  -1 1009.90   18.26
   4 -16  -1  990.64   18.67
  -4  16   1 1014.96   20.89
  -4 -16   0    6.06    6.22
   4  16   0    1.64    6.98
   4  16   0   -1.11    5.73
   4 -16   0  -10.06    7.05
  -4  16   0   13.38    8.02
  -4 -16  -1  273.47   10.78
   4  16   1  271.49   12.28
   4  16   1  267.10   10.10
   4 -16   1  277.24   12.24
  -4  16  -1  279.33   12.85
   4  16   2  228.26    9.07
   4  16   2  204.50   10.98
  -4 -16  -2  232.69   10.48
  -4  16  -2  231.18   11.88
   4 -16   2  211.12   11.14
   4  16   3   40.59    8.17
   4  16   3   46.72    6.03
   4 -16   3   40.42    8.93
  -4 -16  -3   37.43    7.52
  -4  16  -4  214.16   12.03
   4  16   4  243.63   12.17
   4 -16   4  217.18   12.70
  -4 -16  -4  238.26   11.47
   4  16   4  231.45    8.82
   4  16   5  218.39   11.54
  -4 -16  -5  220.80   11.96
   4 -16   5  229.43   13.11
   4  16   6   68.51    8.96
   4 -16   6   60.98   10.85
  -4  16  -6   72.68    9.56
  -4 -16  -6   77.75    9.66
  -4 -16  -7  492.48   16.72
   4  16   7  488.97   16.03
  -4  16  -7  451.72   15.78
   4 -16   7  429.28   16.88
  -4 -16  -8   -0.24    8.70
   4  16   8    5.82    7.77
   4 -16   8    6.51    9.84
   4  16   9   83.87    9.69
  -4  16  -9   55.59    9.30
   4 -16   9   96.73   12.42
  -4 -16  -9   76.21   11.17
   4  16  10  106.46   11.36
   4  16  10   97.35    9.59
  -4 -16 -10   78.08   11.19
   4 -16  10   72.90   12.34
   4  16  11    7.29    9.36
   4  16  11    0.03    6.93
  -4 -16 -11    6.42    9.82
   4 -16  11   14.65   11.52
  -4 -16 -12   67.13   11.26
   4  16  12   30.11    9.77
   4 -16  12   43.40   12.24
  -4 -17  10  134.99   11.97
   4 -17 -10  114.03   11.53
   4 -17  -9    6.61    8.82
   4  17  -9   15.09   10.20
  -4 -17   9    5.77    9.42
   4  17  -8  252.33   14.25
  -4 -17   8  214.20   12.97
   4 -17  -8  239.06   13.66
   4 -17  -7   10.15    8.29
   4  17  -7   21.03    9.36
   4 -17  -6  321.22   14.34
  -4 -17   6  333.52   13.06
   4  17  -6  362.69   15.22
  -4 -17   6  311.25   14.47
   4 -17  -5  149.59   11.19
   4  17  -5  188.50   11.62
  -4 -17   5  165.32   10.40
  -4 -17   5  153.38   11.57
   4 -17  -4   41.43    9.19
   4  17  -4   55.60    9.14
  -4 -17   4   47.20    7.80
  -4 -17   3  128.09   10.48
   4 -17  -3  144.58   10.73
   4  17  -3  133.30   10.13
  -4 -17   3  148.69    9.57
   4 -17  -2  282.99   13.37
   4  17  -2  278.30   12.75
  -4 -17   2  239.16   11.10
  -4  17   2  296.30   13.37
   4  17  -2  263.77   11.83
   4 -17  -2  232.87   10.83
  -4 -17   1   49.87    7.48
   4  17  -1   68.67    8.96
  -4  17   1   64.25    9.48
   4  17  -1   53.80    7.78
   4 -17  -1   71.48    8.27
   4  17   0  654.98   17.30
   4  17   0  669.76   15.71
  -4 -17   0  612.79   15.26
   4 -17   0  659.24   17.03
  -4  17   0  713.98   18.59
   4  17   1   19.64    8.14
  -4  17  -1   21.98    7.83
  -4 -17  -1   29.65    7.18
   4  17   2  150.77   10.65
  -4  17  -2  164.14   11.60
   4  17   2  134.28    8.21
  -4 -17  -2  133.23    9.53
   4 -17   2  149.09   11.14
   4  17   3  108.47   10.16
  -4  17  -3  104.20   10.25
   4  17   3   94.86    7.04
   4 -17   3   88.21   10.62
  -4 -17  -3   88.97    9.17
  -4 -17  -4   29.89    7.85
   4  17   4   49.61    8.89
  -4  17  -4   28.40    8.55
   4  17   4   34.37    5.47
   4  17   5   -0.09    8.11
  -4 -17  -5    8.91    7.40
  -4  17  -5   10.58    8.15
   4 -17   5    7.06    9.31
   4  17   6  460.82   15.63
  -4 -17  -6  468.48   15.86
   4 -17   6  437.75   17.53
  -4  17  -6  419.46   15.51
  -4 -17  -7    3.57    8.26
   4  17   7    1.59    7.91
  -4  17  -7    2.97    8.45
   4 -17   7    8.67   10.10
  -4 -17  -8  322.79   15.45
   4  17   8  324.89   14.10
  -4  17  -8  333.50   14.86
   4 -17   8  363.89   16.95
   4  17   9  122.60   10.32
  -4 -17  -9  112.14   12.03
  -4  17  -9  110.70   10.66
   4 -17   9  127.39   13.31
   4 -17  10   22.37   11.00
   4 -17  11   33.80   11.93
  -4 -17 -11   16.42    9.77
   4  18 -11   -4.64   10.14
  -4 -18  11    7.20    8.69
  -4 -18  10  214.00   13.73
   4 -18 -10  224.63   13.54
   4 -18  -9   13.53    8.86
   4  18  -9    0.65    9.91
  -4 -18   9  -10.46    9.86
  -4 -18   8   11.19    9.63
   4 -18  -8   -3.68    9.06
   4  18  -8   -3.51    9.80
  -4 -18   7   -3.24    9.15
   4 -18  -7    8.48    8.37
   4  18  -7   11.84    9.54
   4 -18  -6  223.60   12.70
   4  18  -6  180.11   12.35
  -4 -18   6  191.82   12.50
  -4 -18   5    0.59    8.69
   4 -18  -5   -6.64    8.95
   4  18  -5    9.04    9.21
   4 -18  -4  617.55   18.72
  -4 -18   4  589.08   16.05
   4  18  -4  610.51   17.96
  -4 -18   4  644.60   18.84
  -4 -18   3    0.73    8.65
   4 -18  -3    1.66    8.28
  -4 -18   3    3.25    7.01
   4  18  -3    8.00    7.63
   4 -18  -2  228.64   12.81
   4  18  -2  254.88   12.77
  -4  18   2  242.12   13.27
   4  18  -2  259.59   12.05
   4 -18  -2  232.91   11.36
  -4 -18   2  237.00   11.16
   4  18  -1  -11.63    7.03
   4  18  -1    4.88    7.69
  -4  18   1    2.40    8.74
  -4 -18   1   -4.37    6.90
   4 -18  -1    8.66    7.33
   4  18   0   10.57    7.96
  -4  18   0    5.52    8.22
   4  18   1    5.80    8.18
  -4 -18  -1    7.31    7.18
  -4  18  -1   11.28    8.82
   4  18   1   11.54    6.49
   4 -18   1    4.52    8.54
   4  18   2  538.43   16.98
  -4 -18  -2  571.19   15.47
   4  18   2  570.92   14.52
   4 -18   2  562.03   17.77
  -4  18  -2  547.17   17.44
   4  18   3   28.11    8.52
  -4  18  -3   28.81    8.84
  -4 -18  -3   50.86    8.68
   4 -18   3   30.14    9.18
   4  18   4  496.70   16.38
  -4  18  -4  477.77   16.98
   4 -18   4  494.11   17.68
  -4 -18  -4  476.95   15.63
   4  18   5   15.34    8.73
  -4 -18  -5    1.27    8.24
  -4  18  -5   10.22    8.42
   4  18   6  174.24   12.20
  -4  18  -6  194.55   12.56
  -4 -18  -6  178.55   11.94
   4 -18   6  165.92   13.05
   4 -18   7    5.60   10.70
   4  18   7    4.83    8.38
  -4  18  -7   19.69    8.39
   4  18   8  144.59   11.07
  -4  18  -8  140.23   11.74
   4 -18   8  135.37   14.30
  -4 -18  -8  108.63   11.33
   4  18   9    6.59    7.61
   4 -18   9   24.78   11.66
   4  18  10   78.37    9.12
  -4 -18 -10  103.54   12.07
   4 -18  10  104.44   13.87
  -4 -18 -11   -9.03   10.42
   4 -18  11   -3.42   11.90
   4  19 -10   57.26   11.68
   4  19  -9   52.57   11.46
   4  19  -8  181.20   13.98
  -4 -19   8  199.53   13.50
   4 -19  -8  157.09   12.53
  -4 -19   7    5.88    9.21
   4 -19  -7    4.57    8.81
   4 -19  -6  304.49   14.98
   4  19  -6  264.69   15.41
  -4 -19   6  253.20   14.73
   4 -19  -5   62.96   10.33
  -4 -19   5   71.54   10.88
   4 -19  -4    9.36    9.19
  -4 -19   4    8.48    9.54
   4  19  -4   14.73    8.99
  -4 -19   3   95.46   11.26
   4 -19  -3  118.69   11.18
   4  19  -3  125.70   11.03
  -4 -19   3   93.73    9.18
  -4 -19   2  117.68   11.27
   4 -19  -2  134.51   11.33
  -4  19   2  137.98   11.67
   4  19  -2  133.35   10.71
   4 -19  -2  121.55   10.09
  -4 -19   2  124.41    9.84
  -4 -19   1   13.30    8.87
   4  19  -1   34.29    8.95
  -4  19   1   21.04    9.25
  -4 -19   1   10.91    6.99
   4  19  -1    8.05    7.06
   4 -19  -1   14.06    7.84
   4  19   0  459.77   16.62
  -4 -19   0  438.55   14.21
   4  19   0  494.06   14.67
  -4  19   0  471.56   16.87
   4 -19   0  469.35   16.10
   4 -19   1   14.84    8.69
  -4 -19  -1   34.25    7.88
   4  19   2   57.66    9.83
  -4 -19  -2   57.19    8.53
   4  19   2   35.75    7.05
   4 -19   2   56.60    9.96
  -4  19  -2   58.99   10.16
   4  19   3  429.85   16.11
  -4  19  -3  424.06   16.37
   4  19   3  415.32   12.83
  -4 -19  -3  414.97   14.48
   4 -19   3  445.37   17.25
   4  19   4   48.20    9.87
  -4 -19  -4   56.05    9.22
  -4 -19  -5  100.49   10.36
   4  19   5  112.84   10.94
  -4  19  -5   89.45   10.74
   4 -19   5  106.97   12.54
   4  19   6  201.03   12.74
  -4 -19  -6  236.21   13.12
  -4  19  -6  219.05   13.43
   4 -19   6  200.48   14.23
   4  19   7    5.41    8.66
  -4  19  -7    5.52    8.86
  -4 -19  -7    3.26    8.72
   4 -19   7   19.43   10.89
   4  19   8  170.02   11.79
  -4  19  -8  182.64   12.99
  -4 -19  -8  181.93   13.32
   4 -19   8  202.90   14.99
  -4 -19  -9    3.50    9.53
  -4  19  -9   13.68    8.57
   4 -19   9   24.68   11.11
   4  19  10    6.05    7.88
  -4 -19 -10    0.26    9.75
   4 -19  10    5.56   11.48
  -4 -20  10   71.46   11.46
   4  20  -9  129.72   13.93
  -4 -20   9  170.03   13.88
   4 -20  -9  151.49   12.43
   4 -20  -8   -2.77    8.90
  -4 -20   8  -14.55   10.77
   4 -20  -7  249.85   13.92
   4  20  -7  247.58   15.69
  -4 -20   7  225.27   14.20
   4  20  -6   54.51   11.38
   4  20  -5   18.42    9.66
   4 -20  -4   95.88   11.24
   4  20  -4   96.40   11.33
  -4 -20   4   86.25   11.97
  -4 -20   3   70.52   10.75
   4 -20  -3   66.83   10.39
   4  20  -3   76.07   10.73
  -4 -20   2   80.90   11.38
   4 -20  -2   61.64   10.39
   4  20  -2   51.83    9.43
  -4 -20   2   55.56    8.43
  -4  20   2   67.05   10.83
  -4 -20   1  554.40   18.56
   4  20  -1  527.52   17.92
   4  20  -1  560.11   16.67
   4 -20  -1  581.28   17.53
  -4  20   1  534.06   18.00
   4  20   0   -2.61    9.82
  -4  20   0  -11.87    9.58
   4  20   0   14.47    7.33
  -4 -20   0  -13.38    7.69
   4 -20   0   -4.56    9.11
   4  20   1  141.83   12.41
  -4 -20  -1  148.48   10.33
  -4  20  -1  169.35   12.48
   4  20   1  147.68    9.97
   4 -20   1  170.17   13.27
   4  20   2   38.97    9.34
  -4 -20  -2   56.53    8.53
  -4  20  -2   54.11   10.00
   4  20   2   50.96    7.47
   4 -20   2   53.03   10.73
   4  20   3   93.12   10.54
  -4  20  -3  123.59   12.21
   4  20   3  101.36    8.26
  -4 -20  -3  125.04   10.54
   4 -20   3  106.55   12.20
   4  20   4   66.31   10.58
  -4  20  -4   61.69   10.63
   4 -20   4   71.65   11.54
  -4 -20  -4   82.93   10.11
   4  20   5  213.00   13.64
  -4  20  -5  204.42   13.93
   4 -20   5  233.34   14.71
  -4 -20  -5  199.43   12.43
  -4 -20  -6    7.94    8.58
   4  20   6   27.68    8.79
   4 -20   6    2.69   10.72
   4  20   7  150.30   12.10
  -4 -20  -7  117.88   11.40
  -4  20  -7  125.74   12.10
   4 -20   7  115.84   13.53
   4  20   8   17.63    8.67
   4 -20   8   17.90   11.22
   4  20   9   86.16   10.01
  -4  20  -9   94.17   11.30
  -4 -20  -9  106.14   12.00
   4 -20   9  110.17   14.63
   4 -21  -9   52.12   10.07
   4 -21  -8    8.18    8.96
   4  21  -8  -16.07   11.15
  -4 -21   8   -7.85   10.18
  -4 -21   7   33.53   10.95
   4  21  -7   13.45   10.53
   4  21  -6   14.52   10.41
   4 -21  -6   18.43    8.93
   4 -21  -5  269.61   14.52
   4  21  -5  256.27   14.72
  -4 -21   5  250.86   15.31
   4  21  -4  -11.49    9.91
   4 -21  -3  290.00   14.89
   4  21  -3  281.91   14.24
  -4 -21   3  247.46   15.07
  -4 -21   2    1.57   10.01
   4 -21  -2   -1.73    9.47
  -4  21   2  -17.36    9.90
   4  21  -2   15.34    8.33
  -4 -21   1    7.16    9.72
  -4  21   1    9.32    9.17
   4 -21  -1    9.25    8.60
   4  21   0   10.40    9.95
  -4  21   0   18.51   10.16
   4  21   0   11.67    7.75
   4  21   1   88.82   11.09
  -4 -21  -1   72.85    9.48
   4  21   1   84.55    9.01
  -4  21  -1   95.02   11.15
   4 -21   1   79.57   11.41
   4  21   2    0.30    9.78
  -4 -21  -2   14.79    7.89
   4  21   2    6.23    6.77
  -4  21  -2   15.26    9.66
   4 -21   2    1.23   10.07
   4  21   3  470.45   17.91
  -4 -21  -3  502.38   16.30
  -4  21  -3  486.40   18.13
   4 -21   3  503.84   19.44
   4  21   4  -10.97   10.24
  -4  21  -4   -5.55    9.72
   4 -21   4    1.83   10.65
  -4 -21  -4   -4.19    8.46
   4  21   5  149.15   12.55
  -4  21  -5  156.99   13.36
   4 -21   5  158.66   14.60
  -4 -21  -5  146.54   11.30
   4  21   6    5.82    9.00
  -4  21  -6    3.47    9.47
  -4 -21  -6  -15.13    9.31
   4 -21   6    1.65   10.87
   4  21   7    6.94    8.79
  -4 -21  -7  -13.77    9.59
  -4  21  -7    9.17    9.39
   4 -21   7    2.19   11.30
  -4 -21  -8   13.81    8.92
  -4  21  -8   10.09    9.26
   4 -21   8   15.37   11.70
   4  21   9   62.22    9.97
  -4  21  -9   80.44   11.30
   4 -22  -8   -1.75    9.56
   4  22  -7  156.62   14.18
  -4 -22   7  153.27   14.30
  -4 -22   6   52.39   11.72
  -4 -22   5   19.58   10.29
   4 -22  -4   89.96   11.09
  -4 -22   4   83.18   12.78
   4  22  -4   80.81   10.73
   4  22  -3   52.61   10.02
  -4 -22   2   53.65   10.96
   4  22  -2   46.08    9.22
  -4 -22   1  168.89   13.77
   4 -22  -1  188.13   13.50
  -4  22   1  189.86   13.64
   4  22  -1  195.09   12.38
  -4 -22   0    4.87    9.79
   4 -22   0    3.34    9.04
   4  22   0   -4.71    7.60
  -4 -22  -1  211.08   14.68
   4  22   1  197.45   14.31
  -4  22  -1  189.16   14.07
   4  22   1  174.05   10.94
   4 -22   1  187.27   13.50
   4  22   2   53.92    8.33
   4  22   3  -20.75   10.79
  -4 -22  -3   10.20    8.33
  -4  22  -3   -5.63   10.08
   4 -22   3  -11.63   11.00
   4  22   4  120.05   12.40
  -4  22  -4  108.90   12.68
  -4 -22  -4  119.68   11.12
   4 -22   4  112.85   13.51
   4  22   5   63.93   10.71
   4 -22   5   86.89   12.86
  -4  22  -5   71.16   11.53
  -4 -22  -5   82.20   10.38
  -4 -22  -6    3.02    8.45
   4 -22   6   -8.61   10.94
  -4  22  -6   21.92   10.15
  -4 -22  -7  112.71   11.79
   4  22   7  129.76   11.83
  -4  22  -7  118.18   12.87
   4 -22   7  120.50   15.13
   4  22   8    0.68    7.95
  -4 -22  -8    5.36    9.08
   4 -23  -6   75.56   11.09
  -4 -23   5   47.12   11.47
   4 -23  -5   35.53   10.03
   4  23  -5   31.73   11.12
  -4 -23   4    0.27   11.16
   4 -23  -4  -10.66    9.29
   4  23  -4    4.29    9.68
   4 -23  -3   61.56   10.73
   4  23  -3   42.56   10.19
   4 -23  -2  145.61   12.64
   4  23  -2  158.69   12.53
  -4 -23   2  118.43   13.39
  -4 -23   1   -2.47   10.17
   4 -23  -1    2.19    9.06
  -4  23   1   -1.18   10.24
  -4 -23   0  182.94   14.11
  -4  23   0  183.94   14.10
   4  23   0  196.95   12.24
   4 -23   0  192.90   13.60
  -4 -23  -1   16.33   10.27
  -4  23  -1   12.55   10.62
   4  23   1   -3.92    7.57
   4 -23   1   -5.85   10.27
  -4 -23  -2  103.52   12.24
   4  23   2  114.77   12.73
  -4  23  -2   66.14   11.37
   4  23   2  105.78    9.45
   4 -23   2   97.88   12.60
   4  23   3    7.30   10.09
  -4  23  -3   25.57   10.38
  -4 -23  -3   11.19   10.27
   4 -23   4   29.88   12.08
   4  23   5   16.83    9.87
  -4  23  -5   10.59   10.21
   4  23   6  115.07   11.81
  -4 -23  -7   -1.43    8.35
   4 -24  -3    5.15    9.82
   4  24  -3   10.94    9.64
   4 -24  -2  132.82   12.69
   4  24  -2  127.30   12.03
   4 -24  -1   -1.02   10.05
  -4  24   1   20.98   10.92
   4  24  -1   11.93    8.32
  -4 -24   0   -4.77    9.98
  -4  24   0  -14.73   10.74
   4  24   0   20.66    8.62
  -4 -24  -1   19.95   10.35
  -4  24  -1   -8.46   10.12
   4  24   1  -16.06    7.93
   4 -24   1   -5.27    9.93
  -4 -24  -2  101.33   13.21
   4 -24   2  122.76   13.28
  -4  24  -2  103.74   13.04
  -4 -24  -3   -2.35   10.10
   4 -24   3  -11.84   11.36
   4 -24   4  214.40   16.24
   4  25   0   99.59   10.36
   4  25   1   29.74    7.88
  -5   0  15  198.92   14.02
   5   0 -14    5.91    7.81
  -5   0  14  -11.28    9.16
  -5   0  13  404.83   16.54
   5   0 -13  403.77   14.89
  -5   0  12   10.97    8.71
   5   0 -12    3.94    8.14
  -5   0  11   15.97    8.17
   5   0 -11   15.32    7.70
  -5   0  10  -15.51    7.50
   5   0 -10   -1.46    7.08
   5   0  -9  316.75   12.22
  -5   0   9  289.63   11.70
  -5   0   8    0.50    6.07
   5   0  -8    1.85    6.91
  -5   0   7 2131.49   23.72
   5   0  -7 2211.96   25.87
  -5   0   6    3.32    5.50
   5   0  -6    6.47    7.18
   5   0  -5 1149.17    8.27
  -5   0   5 1199.83   16.31
   5   0  -5 1177.84   18.34
   5   0  -4    6.74    2.05
  -5   0   4    4.60    4.60
   5   0  -4    7.61    6.63
   5   0  -3   32.14    2.91
  -5   0   3   26.13    4.93
   5   0  -3   36.73    6.71
   5   0  -2   -0.06    2.74
  -5   0   2    3.66    4.07
   5   0  -2    2.41    5.44
   5   0  -1 2534.97   18.34
  -5   0   1 2453.95   18.56
   5   0  -1 2452.58   21.60
   5   0   0    5.59    3.67
  -5   0   0   -1.88    3.49
   5   0   0    2.19    4.63
  -5   0  -1 1990.65   15.63
   5   0   1 2026.38   18.45
   5   0   1 2037.85   17.84
  -5   0  -2    3.29    3.12
   5   0   2    0.70    3.57
  -5   0  -3  478.31    8.43
   5   0   3  476.36   10.72
   5   0   3  492.98    8.16
  -5   0  -4    0.75    3.35
   5   0   4    1.84    2.66
  -5   0  -5  830.93   12.32
   5   0   5  774.90   14.64
   5   0   5  781.30    7.78
   5   0   6    5.93    4.32
   5   0   6    4.14    6.08
   5   0   7 1321.28   17.23
   5   0   7 1330.40   20.06
   5   0   8    6.40    4.94
   5   0   8   -0.29    6.64
   5   0   9 1404.69   19.92
   5   0   9 1443.86   22.48
   5   0  10   -4.95    6.00
   5   0  10   -0.92    6.89
   5   0  11   66.18    7.79
   5   0  11   67.97    8.94
   5   0  12   -4.98    6.79
   5   0  13   20.09    8.39
   5   0  14   -5.15    7.63
   5   0  14   11.37    8.01
   5   0  15  225.77   12.51
   5   0  15  250.70   13.06
   5   0  16    6.67    7.82
  -5   1  15   24.30   10.15
  -5  -1  15    6.72    9.81
  -5   1  14   64.61   10.80
   5  -1 -14   64.64    9.11
   5   1 -14   47.08    8.59
  -5   1  13   95.87   11.51
  -5  -1  13  127.87   11.63
   5   1 -13  109.16   10.62
   5  -1 -13   97.03    9.92
  -5   1  12   82.46    9.98
  -5  -1  12   55.18    9.69
   5  -1 -12   72.08    9.05
   5   1 -12   51.10    8.69
  -5   1  11  672.94   17.73
   5   1 -11  702.46   17.17
   5  -1 -11  732.66   17.80
  -5  -1  11  696.24   18.09
   5   1 -10   49.89    8.34
  -5  -1  10   40.66    7.83
   5   1  -9  674.14   16.23
   5  -1  -9  672.48   16.21
  -5   1   9  660.27   15.89
  -5  -1   9  657.17   15.75
  -5  -1   8  280.49   10.60
   5   1  -8  277.44   11.28
   5  -1  -8  267.60   11.57
  -5   1   8  264.63   10.46
  -5   1   7    2.58    5.67
  -5  -1   7    9.55    5.74
   5   1  -7   11.92    7.05
   5  -1  -7   14.98    7.60
  -5   1   6  633.50   12.69
  -5  -1   6  703.78   13.60
   5   1  -6  689.33   14.75
   5  -1  -6  719.42   15.81
  -5  -1   6  641.59    6.61
   5  -1  -5  334.05    3.66
   5   1  -5  359.83    5.57
  -5   1   5  378.04    9.84
  -5  -1   5  341.33    9.55
   5   1  -5  376.16   11.62
   5  -1  -5  390.52   11.92
   5   1  -4  155.15    4.32
   5  -1  -4  157.96    3.62
  -5   1   4  140.51    6.57
  -5  -1   4  147.58    7.08
   5   1  -4  151.51    8.42
   5  -1  -4  165.05    9.05
   5   1  -3 2547.61   16.54
   5  -1  -3 2580.52   15.27
  -5   1   3 2664.34   20.99
  -5  -1   3 2659.97   21.92
   5   1  -3 2648.74   24.06
   5  -1  -3 2596.02   24.35
   5   1  -2   83.21    4.21
   5  -1  -2   80.47    3.90
  -5   1   2   79.89    5.11
  -5  -1   2   85.80    5.68
   5   1  -2   78.73    6.60
   5  -1  -2   85.00    6.87
   5   1  -1  440.13    8.47
   5  -1  -1  436.73    8.02
  -5   1   1  431.76    8.26
  -5  -1   1  422.93    8.66
   5   1  -1  438.92    9.92
   5  -1  -1  411.74   10.13
  -5  -1   0 1676.26   15.25
   5   1   0 1644.22   16.28
   5  -1   0 1696.44   16.01
   5   1   0 1675.39   16.85
  -5   1   0 1638.79   14.44
  -5   1  -1  173.61    5.53
   5   1   1  189.76    6.84
  -5  -1  -1  194.86    6.09
   5  -1   1  181.89    6.61
   5   1   1  196.78    6.50
   5  -1   1  197.08    6.88
   5   1   2  132.65    6.34
   5  -1   2  129.19    5.71
   5  -1   2  127.43    6.36
  -5   1  -2  143.89    5.02
  -5  -1  -2  131.93    5.28
   5   1   2  144.88    5.35
  -5  -1  -3  708.86   10.49
   5   1   3  658.48   12.30
   5  -1   3  644.47   12.36
   5   1   3  683.93    8.77
  -5   1  -3  686.41    9.40
   5  -1   4   26.57    5.78
  -5   1  -4   17.76    3.41
   5   1   4   18.72    2.56
   5  -1   4   17.70    3.23
  -5  -1  -4   11.75    3.79
  -5   1  -5 2571.78   19.89
  -5  -1  -5 2600.37   21.64
   5   1   5 2543.01   25.08
   5  -1   5 2648.21   25.65
   5   1   5 2566.38   11.49
   5  -1   5 2669.88   16.01
   5  -1   6  440.06    9.32
   5   1   6  431.86   10.01
   5   1   6  415.45   11.73
   5  -1   6  416.25   11.93
  -5  -1  -6  420.17   10.08
  -5   1  -6  405.97    9.29
   5  -1   7   10.65    4.32
   5   1   7    9.92    4.60
   5   1   7   12.43    6.25
   5  -1   7    1.75    6.67
   5  -1   8  246.10    8.58
   5   1   8  257.80    9.58
   5   1   8  230.96   10.33
   5  -1   8  246.32   10.75
   5   1   9  100.86    7.91
   5  -1   9  105.90    7.36
   5   1   9  102.03    8.72
   5  -1   9   95.74    8.75
   5   1  10  146.00    9.04
   5  -1  10  153.68    8.51
   5   1  10  152.37    9.72
   5  -1  10  170.90   10.33
   5   1  11  483.78   14.33
   5  -1  11  489.96   13.93
   5   1  11  528.20   15.55
   5  -1  11  533.26   15.77
   5   1  12   -8.19    7.58
   5  -1  12    3.69    6.64
   5   1  12    0.35    7.37
   5  -1  12    5.31    7.45
   5   1  13  231.19   12.26
   5  -1  13  247.68   11.93
   5   1  13  265.33   13.00
   5  -1  13  228.21   12.70
   5   1  14   61.09    9.30
   5  -1  14   74.03    9.01
   5   1  14   74.67    9.39
   5  -1  14   88.10    9.83
   5   1  15   -0.39    7.73
   5   1  15   -2.77    7.81
   5  -1  15   -6.20    7.73
   5   1  16   15.80    8.39
   5   1  16   17.84    7.82
   5  -1  16   18.69    8.09
  -5  -2  15    3.74    9.69
   5   2 -15   22.18    8.06
   5   2 -14    2.92    7.76
   5  -2 -14    1.48    7.80
  -5  -2  14    8.15    9.20
  -5   2  13  170.49   12.54
  -5  -2  13  155.53   11.97
   5   2 -13  143.50   10.75
   5  -2 -13  155.61   11.17
  -5   2  12  509.10   17.29
   5   2 -12  537.03   16.34
  -5  -2  12  511.57   16.98
   5  -2 -12  499.40   15.94
  -5   2  11   -7.62    8.00
  -5  -2  11    3.69    7.62
   5   2 -11    3.05    7.38
   5  -2 -11  -14.81    8.42
   5   2 -10  739.18   17.42
   5  -2 -10  757.79   17.94
  -5  -2  10  747.08   17.55
   5   2  -9   77.63    8.74
   5  -2  -9   85.70    9.61
  -5   2   9   78.73    8.35
  -5  -2   9   65.30    7.81
  -5  -2   8  312.54   11.15
   5   2  -8  343.94   12.05
  -5   2   8  328.37   11.27
  -5  -2   7  410.95   11.72
   5   2  -7  433.44   12.76
   5  -2  -7  438.87   13.64
  -5   2   7  399.64   11.32
  -5   2   6  100.89    6.80
  -5  -2   6  102.68    7.59
   5   2  -6  120.88    8.51
   5  -2  -6  116.20    9.57
  -5  -2   6  105.11    3.72
   5   2  -5  112.29    3.97
  -5   2   5  122.04    6.66
  -5  -2   5  121.73    7.08
   5   2  -5  120.70    8.25
   5  -2  -5  129.86    9.23
   5   2  -4 1101.88   10.80
  -5   2   4 1145.83   14.81
   5  -2  -4 1090.98    7.77
  -5  -2   4 1074.63   15.25
   5   2  -4 1052.28   16.25
   5  -2  -4 1122.84   17.73
  -5  -2   3    7.01    4.99
   5   2  -3    4.59    2.79
   5   2  -3   10.43    5.63
   5  -2  -3    5.71    6.09
   5   2  -2  226.34    6.23
   5  -2  -2  240.28    5.57
  -5   2   2  224.96    6.86
  -5  -2   2  227.38    7.23
   5   2  -2  225.72    8.00
   5  -2  -2  217.94    8.83
   5   2  -1 1301.88   14.18
   5  -2  -1 1289.40   13.00
  -5   2   1 1263.77   13.24
  -5  -2   1 1282.80   14.37
   5   2  -1 1266.78   15.18
   5  -2  -1 1298.40   16.76
   5  -2   0   27.96    4.78
  -5  -2   0   37.00    4.55
   5   2   0   35.91    4.16
   5  -2   0   30.40    4.05
  -5   2   0   38.55    3.65
   5   2   0   43.26    4.83
  -5   2  -1  143.41    4.91
   5   2   1  147.10    6.42
  -5  -2  -1  140.21    5.81
   5  -2   1  153.24    6.37
   5   2   1  155.66    5.65
   5  -2   1  132.61    6.30
   5   2   2 2520.76   22.08
  -5   2  -2 2393.58   16.05
   5  -2   2 2450.99   21.74
  -5  -2  -2 2500.93   18.96
   5   2   2 2485.95   16.72
   5  -2   2 2437.77   19.35
  -5  -2  -3  509.69    9.53
   5   2   3  510.09   11.26
   5  -2   3  519.50   11.37
  -5   2  -3  540.12    8.15
   5   2   3  537.44    7.35
   5  -2   3  529.59    9.20
   5   2   4 1780.70   11.02
  -5   2  -4 1726.07   14.67
   5   2   4 1730.33   20.23
   5  -2   4 1776.19   20.57
  -5  -2  -4 1745.35   17.50
   5  -2   4 1814.06   15.09
   5   2   5  141.38    7.92
  -5  -2  -5  117.84    6.76
   5  -2   5  143.84    8.35
   5   2   5  126.85    2.46
   5  -2   5  140.25    4.85
  -5   2  -5  132.78    5.39
   5  -2   6 1370.69   15.05
   5   2   6 1382.74   17.41
   5   2   6 1356.14   19.60
  -5  -2  -6 1387.57   17.65
  -5   2  -6 1343.82   15.28
   5  -2   6 1396.92   20.26
   5  -2   6 1397.06   11.63
   5  -2   7  794.82   12.76
   5   2   7  781.97   14.45
   5   2   7  737.69   15.39
   5  -2   7  786.20   16.26
   5   2   8   -2.14    5.32
   5   2   8    1.94    6.46
   5  -2   8   -3.53    7.02
   5  -2   9   90.43    6.56
   5   2   9  113.60    8.10
   5   2   9  116.52    9.14
   5  -2   9  125.49    9.22
   5   2  10  353.79   12.40
   5  -2  10  352.35   11.07
   5  -2  10  366.83   13.30
   5   2  11   78.25    8.44
   5  -2  11   67.58    7.34
   5   2  11   76.91    9.01
   5  -2  11   72.76    9.12
   5   2  12  327.94   13.10
   5  -2  12  330.11   12.42
   5   2  12  330.19   13.47
   5  -2  12  336.46   13.79
   5  -2  13   50.60    7.78
   5   2  13   32.44    7.96
   5   2  13   43.90    9.01
   5   2  14   78.95    9.86
   5   2  14   63.84    9.02
   5  -2  14   66.78    9.65
   5   2  15   47.81    8.39
   5  -2  15   57.04    9.73
   5   2  16   -5.84    8.12
   5  -2  16   20.02    8.19
   5   3 -15    3.75    8.09
  -5  -3  15  -10.98    9.26
  -5   3  15   19.29   10.37
   5   3 -14  245.90   12.81
  -5   3  14  266.58   15.57
  -5  -3  14  271.39   14.97
   5  -3 -14  292.11   13.65
  -5  -3  13    0.77    9.03
   5   3 -13   12.46    8.23
   5  -3 -13    4.03    7.71
  -5   3  13   12.21    9.41
  -5   3  12  143.13   11.80
   5   3 -12  160.00   11.21
   5  -3 -12  170.84   11.39
  -5  -3  12  177.01   11.78
   5   3 -11    5.33    7.64
   5  -3 -11    5.07    8.09
  -5   3  11    5.09    8.20
  -5   3  10  115.77    9.62
   5  -3 -10  126.79   10.41
  -5  -3  10  141.68   10.19
   5   3 -10  126.70    9.53
  -5  -3   9  165.39    9.81
   5   3  -9  143.86    9.79
  -5   3   9  155.24    9.69
   5  -3  -9  161.00   10.74
  -5  -3   8 1464.71   21.35
   5   3  -8 1448.53   21.76
   5  -3  -8 1484.47   23.12
  -5   3   8 1405.40   20.85
  -5  -3   7  141.69    8.60
   5   3  -7  152.68    9.16
   5  -3  -7  140.99    9.89
  -5   3   7  134.38    8.00
  -5  -3   6 1347.65   12.09
  -5  -3   6 1330.12   18.56
   5   3  -6 1304.47   19.18
   5  -3  -6 1334.50   20.74
  -5   3   6 1270.92   17.44
  -5   3   5  355.99    9.47
   5   3  -5  358.17    6.85
  -5  -3   5  360.15   10.43
   5   3  -5  360.30   11.01
   5  -3  -5  378.11   12.33
  -5   3   4  641.84   11.26
   5   3  -4  652.27    9.16
   5  -3  -4  635.61    5.61
  -5  -3   4  645.82   12.43
   5   3  -4  618.59   12.84
   5  -3  -4  627.44   14.08
  -5  -3   3    0.46    4.95
   5   3  -3    3.12    2.93
   5  -3  -3    4.51    2.10
  -5   3   3    1.24    3.53
   5   3  -3    4.13    4.85
   5  -3  -3   10.05    6.30
   5   3  -2  869.51   11.43
  -5   3   2  878.33   11.38
   5  -3  -2  902.21   10.00
  -5  -3   2  910.23   13.14
   5   3  -2  868.12   13.32
   5  -3  -2  899.51   14.90
   5   3  -1  275.47    7.43
   5  -3  -1  263.05    6.57
  -5   3   1  268.74    6.68
   5   3  -1  266.45    7.77
   5  -3  -1  257.89    8.70
  -5  -3   1  261.44    7.75
  -5  -3   0 2117.29   18.04
   5   3   0 2195.05   19.54
   5  -3   0 2167.29   18.47
  -5   3   0 2172.53   15.69
   5   3   0 2172.22   18.08
   5  -3   0 2111.54   20.11
   5  -3   1    5.38    4.35
   5   3   1   -1.38    3.98
  -5   3  -1   -0.09    2.97
  -5  -3  -1    5.45    4.21
   5  -3   1    9.61    4.40
  -5   3  -2 1524.75   12.34
   5   3   2 1532.34   17.88
   5  -3   2 1466.63   17.66
   5   3   2 1554.62   13.08
  -5  -3  -2 1479.09   15.31
   5  -3   2 1480.90   15.73
  -5  -3  -3  358.64    8.62
   5   3   3  376.08    9.95
   5  -3   3  368.95   10.45
  -5   3  -3  377.59    6.62
   5   3   3  378.34    6.04
   5  -3   3  345.62    8.04
  -5   3  -4   84.23    4.04
   5   3   4   95.45    7.02
   5  -3   4   89.70    7.20
   5   3   4   93.40    2.98
  -5  -3  -4   89.49    5.78
   5  -3   4   92.49    4.87
  -5   3  -5    4.85    3.20
   5   3   5    4.83    5.41
   5  -3   5   -0.82    6.39
   5  -3   6 1212.46   12.01
   5   3   6 1222.19   17.10
  -5  -3  -6 1251.83   17.82
   5   3   6 1155.66   18.32
  -5   3  -6 1243.64   13.91
   5  -3   6 1208.21   19.20
   5  -3   7  128.55    6.00
   5   3   7  132.78    7.76
   5   3   7  118.93    8.28
   5  -3   7  121.39    8.97
   5  -3   8 1049.81   14.89
   5   3   8 1072.54   18.07
   5   3   8 1091.28   19.26
   5  -3   9    5.53    4.63
   5   3   9   -3.41    6.02
   5   3   9   -4.88    6.69
   5  -3   9   -5.86    7.39
   5   3  10  309.90   12.13
   5  -3  10  296.96   10.13
   5  -3  10  319.05   12.68
   5   3  11    5.21    6.85
   5  -3  11    5.12    5.31
   5   3  11    4.00    7.17
   5  -3  11   -9.85    8.39
   5   3  12    1.84    6.98
   5  -3  12    6.25    6.06
   5   3  12    6.57    7.54
   5  -3  12    3.44    7.92
   5   3  13    7.03    7.87
   5   3  13   -3.22    7.58
   5  -3  13   15.65    8.22
   5   3  14  273.17   14.13
   5   3  14  241.88   12.56
   5  -3  14  230.19   13.35
   5   3  15    8.63    8.23
   5   3  15   -3.12    7.51
   5   3  16  120.66   11.42
   5  -3  16   95.82   10.66
  -5   4  15  113.37   12.09
  -5  -4  15  107.10   12.70
   5   4 -15  111.05   10.78
  -5  -4  14   59.69   10.70
  -5   4  14    7.57    9.84
  -5  -4  13   22.89    8.87
   5  -4 -13   54.17    9.29
  -5   4  13   54.51   10.47
   5   4 -13   48.64    9.26
  -5   4  12  208.97   12.77
   5   4 -12  212.88   11.95
   5  -4 -12  236.28   12.45
  -5  -4  11   23.52    8.33
   5   4 -11    8.76    7.76
   5  -4 -11   18.33    8.23
  -5   4  11   13.53    8.23
   5   4 -10  687.40   17.15
  -5   4  10  707.38   17.51
   5  -4 -10  740.88   18.31
  -5  -4  10  726.77   17.68
  -5  -4   9  187.35   10.28
   5   4  -9  192.58   10.59
   5  -4  -9  175.68   11.03
  -5  -4   8  260.24   10.88
   5   4  -8  257.62   10.97
  -5   4   8  234.50   10.15
   5  -4  -8  258.04   11.83
  -5  -4   7  487.56   12.88
   5   4  -7  462.79   13.18
  -5   4   7  458.34   12.10
   5  -4  -7  461.52   13.98
  -5  -4   7  479.90    8.19
  -5  -4   6   20.03    3.43
  -5  -4   6   25.35    6.55
   5   4  -6   17.74    6.46
  -5   4   5  581.73   11.67
   5   4  -5  593.86    9.22
  -5  -4   5  607.86   13.07
   5   4  -5  544.09   12.73
   5  -4  -5  564.50   14.41
  -5   4   4 1367.28   15.80
   5   4  -4 1375.29   13.70
   5  -4  -4 1300.42    7.74
  -5  -4   4 1420.94   18.02
   5   4  -4 1323.25   17.63
   5  -4  -4 1396.59   20.23
  -5  -4   3   16.07    5.42
   5  -4  -3   19.14    2.49
   5   4  -3    9.79    5.21
   5   4  -2 1531.99   15.29
  -5   4   2 1574.77   14.87
   5  -4  -2 1583.23   13.50
   5   4  -2 1512.25   17.06
  -5  -4   2 1558.60   17.23
   5  -4  -2 1581.33   19.51
  -5  -4   1   10.71    4.51
   5  -4  -1   20.05    5.60
  -5   4   1   23.30    3.32
   5  -4  -1   28.16    3.92
  -5   4   0   32.71    3.39
  -5  -4   0   33.80    4.82
   5   4   0   34.15    4.53
   5   4   0   37.96    4.20
   5  -4   0   32.47    4.40
   5  -4   0   32.38    5.36
   5   4   1 1354.58   16.55
   5  -4   1 1290.95   15.79
  -5  -4  -1 1268.01   14.87
  -5   4  -1 1288.47   11.38
   5   4   1 1317.79   13.04
   5  -4   1 1245.61   15.82
   5  -4   2  740.91   11.92
  -5   4  -2  777.39    8.62
   5   4   2  782.16   13.39
   5  -4   2  762.79   13.16
   5   4   2  800.70    9.49
  -5  -4  -2  768.86   12.04
   5  -4   3   46.73    4.97
  -5  -4  -3   41.56    5.17
   5   4   3   39.09    5.74
  -5   4  -3   48.20    3.33
   5  -4   3   59.06    6.46
   5   4   3   43.70    2.90
   5  -4   4 2977.17   21.51
   5   4   4 2899.18   26.67
   5  -4   4 3024.48   27.38
   5   4   4 2915.28   13.54
  -5  -4  -4 2987.39   24.26
  -5   4  -4 2976.46   16.90
   5  -4   5  138.02    5.70
   5   4   5  122.51    7.93
  -5  -4  -5  123.07    7.07
  -5   4  -5  120.25    4.62
   5  -4   5  117.82    8.15
   5  -4   6  624.64    9.65
   5   4   6  626.57   13.02
  -5  -4  -6  628.67   13.39
  -5   4  -6  583.19    9.22
   5  -4   6  587.12   14.21
   5  -4   7  248.23    7.06
   5   4   7  277.76   10.19
   5   4   7  263.69   10.46
   5  -4   7  264.58   11.14
   5  -4   8    3.11    3.87
   5   4   8    3.37    6.01
   5   4   8   -1.71    6.49
   5  -4   8   -4.94    7.23
   5  -4   9  600.43   12.10
   5   4   9  620.24   15.41
   5   4   9  652.72   15.99
   5  -4   9  643.51   16.44
   5   4  10  268.36   11.77
   5  -4  10  282.53    9.55
   5   4  10  289.72   12.22
   5  -4  10  296.23   13.09
   5   4  11   -4.16    7.19
   5   4  11   -1.61    6.99
   5  -4  11   13.85    8.22
   5   4  12  315.57   13.66
   5  -4  12  294.00   13.61
   5   4  13   -2.02    7.67
   5  -4  13   12.40    8.43
   5   4  14   59.54    9.96
   5   4  14   61.89    9.05
   5  -4  14   57.15    9.58
   5   4  15   65.29   10.41
   5   4  15   65.33    9.07
   5   4  16   29.24    8.89
   5  -4  16   18.65    8.52
  -5   5  15    9.21   10.23
   5   5 -15  -16.67    8.92
  -5  -5  15    3.67    9.77
  -5   5  14   96.71   11.48
   5   5 -14   94.12   10.01
  -5   5  13  116.12   11.80
   5   5 -13  113.48   10.56
  -5  -5  13  108.07   11.29
   5  -5 -13  107.76   10.01
  -5  -5  12    7.21    8.40
   5   5 -12   36.48    8.27
  -5   5  11  481.80   16.00
   5   5 -11  443.31   15.05
   5  -5 -11  482.07   15.69
  -5  -5  11  464.37   15.54
  -5  -5  10   16.95    7.69
   5   5 -10    1.74    6.96
   5  -5 -10    6.18    8.05
  -5   5  10    5.74    7.52
  -5  -5   9  525.90   14.76
  -5   5   9  508.40   14.66
   5   5  -9  472.37   14.22
   5  -5  -9  506.62   15.85
  -5  -5   8  198.42    9.97
   5   5  -8  204.33   10.50
  -5   5   8  187.92    9.58
   5  -5  -8  222.49   11.55
  -5  -5   7   -1.14    3.36
  -5   5   7   -0.40    5.43
  -5  -5   7    1.76    6.32
   5   5  -7    4.38    6.51
   5  -5  -7    8.18    7.46
  -5  -5   6  323.56    7.63
  -5  -5   6  331.07   10.87
   5   5  -6  310.75   10.87
  -5   5   6  306.96    9.57
   5  -5  -6  333.14   12.14
   5   5  -5 1018.37   12.63
  -5  -5   5  966.19   16.20
   5   5  -5  911.09   16.01
   5  -5  -5 1022.83   18.57
  -5   5   5  949.13   14.62
   5   5  -4   17.69    3.71
   5  -5  -4   13.03    1.66
  -5   5   3 1590.97   15.81
   5   5  -3 1603.58   15.95
   5  -5  -3 1610.53   12.13
  -5  -5   3 1591.57   18.35
   5   5  -3 1559.69   18.21
   5  -5  -3 1568.13   20.48
  -5   5   2  468.12    8.46
   5   5  -2  485.04    9.62
   5  -5  -2  466.35    8.17
   5   5  -2  461.28   10.07
  -5  -5   2  444.40   10.34
  -5  -5   1  618.87   11.45
   5   5  -1  658.20   11.13
  -5   5   1  644.43    8.99
   5  -5  -1  620.89   10.21
   5   5  -1  656.74   10.91
   5  -5  -1  636.72   12.97
   5  -5   0  250.13    8.71
   5   5   0  242.17    7.89
  -5  -5   0  234.26    7.75
  -5   5   0  239.04    5.60
   5  -5   0  220.96    7.45
   5   5   0  229.94    6.68
   5  -5   1  191.18    7.96
   5   5   1  203.96    7.81
   5   5   1  212.75    5.89
   5  -5   1  208.37    7.88
  -5   5  -1  208.52    4.99
  -5  -5  -1  190.07    7.24
   5  -5   2  933.24   13.75
   5   5   2  941.51   15.08
   5  -5   2  970.44   15.30
   5   5   2  930.59   10.22
  -5   5  -2  937.24    9.06
  -5  -5  -2  907.80   13.37
   5  -5   3 1946.04   19.11
  -5   5  -3 1950.24   12.62
   5   5   3 2006.68   21.96
  -5  -5  -3 2009.18   19.86
   5   5   3 1994.01   13.21
   5  -5   3 1992.89   22.09
   5  -5   4    7.85    4.16
   5   5   4    8.56    2.03
   5  -5   5  899.09   12.52
  -5   5  -5  881.65    9.51
   5   5   5  894.09   16.25
  -5  -5  -5  878.01   15.49
   5  -5   5  951.32   17.37
  -5  -5  -6   67.26    7.18
   5  -5   6   70.66    4.80
   5   5   6   64.31    6.65
   5   5   6   53.79    7.18
   5  -5   6   70.51    8.24
  -5   5  -6   60.74    3.78
   5  -5   7  295.74    7.30
   5  -5   7  303.02    7.29
   5   5   7  322.84   10.99
   5   5   7  306.73   11.29
   5  -5   7  312.74   11.85
   5  -5   8  327.59    8.39
   5   5   8  322.58   11.76
   5   5   8  309.24   12.04
   5  -5   8  350.08   13.12
   5  -5   9  114.17    6.13
   5   5   9  113.65    9.00
   5   5   9  113.21    9.16
   5  -5   9   97.48    9.17
   5   5  10   15.41    7.49
   5   5  10    8.78    7.27
   5  -5  10   10.14    8.32
   5   5  11  365.41   14.25
   5   5  11  351.09   13.70
   5  -5  11  356.91   14.63
   5   5  12    7.39    8.49
   5   5  12    2.98    7.72
   5  -5  12   20.48    8.64
   5   5  13  196.55   12.49
   5   5  13  234.82   12.36
   5  -5  13  211.42   12.95
   5   5  14   82.62   10.23
   5   5  14   69.32    9.21
   5  -5  14   53.38    9.92
   5  -5  15    2.36    8.40
   5   5  15    8.45    9.00
   5   5  15    6.28    7.43
  -5  -6  15  281.26   15.98
  -5   6  15  261.38   15.19
   5   6 -15  278.37   14.67
  -5  -6  14   -1.69    9.78
   5   6 -14    2.55    8.14
  -5   6  14   12.07    9.34
  -5   6  13  216.03   13.50
   5   6 -13  226.50   12.78
  -5  -6  13  239.71   13.98
   5  -6 -13  244.10   13.09
  -5   6  12   39.58    9.37
  -5   6  11   57.94    8.99
   5   6 -11   56.38    8.99
   5  -6 -11   49.10    9.63
  -5  -6  10    5.06    7.46
   5   6 -10   15.32    7.76
  -5   6  10   16.67    7.61
   5  -6 -10   18.85    8.59
  -5  -6   9  442.97   14.04
  -5   6   9  455.04   14.23
   5   6  -9  446.19   14.11
   5  -6  -9  493.47   15.46
  -5  -6   8   92.63    8.67
  -5   6   8   92.14    8.03
   5   6  -8  108.17    8.83
  -5  -6   8  110.48    5.72
   5  -6  -8  121.79   10.01
  -5  -6   7 1263.30   19.75
  -5   6   7 1234.29   18.82
   5   6  -7 1238.82   19.89
   5  -6  -7 1246.28   21.61
  -5  -6   7 1312.44   15.13
  -5  -6   6   -4.60    3.93
  -5   6   6    1.76    4.84
  -5  -6   6   -0.78    6.29
   5   6  -6    3.33    6.35
   5  -6  -6    2.72    7.53
   5   6  -5  827.47   12.09
  -5  -6   5  834.98   15.38
  -5   6   5  827.03   13.91
   5  -6  -5  831.85   17.06
   5  -6  -4   -2.04    6.74
   5   6  -4    3.30    3.78
   5   6  -4    6.44    5.71
   5   6  -3  147.94    6.19
   5  -6  -3  160.78    4.94
  -5  -6   3  149.63    7.92
   5   6  -3  153.80    7.41
   5  -6  -3  147.82    8.96
  -5   6   3  152.28    5.99
  -5   6   2   35.43    3.83
   5   6  -2   25.94    4.23
   5  -6  -2   29.62    3.94
   5   6  -2   32.54    5.17
  -5  -6   2   28.68    5.77
   5  -6  -2   40.21    6.75
   5  -6  -1  670.32   13.46
  -5  -6   1  632.50   11.93
  -5   6   1  686.62    9.14
   5   6  -1  675.55   11.86
   5  -6  -1  654.77   11.06
   5   6  -1  695.53   11.29
   5  -6   0   58.78    6.37
  -5   6   0   65.84    3.45
   5   6   0   71.23    5.68
  -5  -6   0   72.93    5.96
   5  -6   0   62.66    5.73
   5   6   0   63.73    4.72
   5  -6   1 2965.29   25.41
   5   6   1 3095.33   25.75
  -5   6  -1 3038.83   16.09
   5  -6   1 3028.24   25.27
  -5  -6  -1 2988.50   23.61
   5   6   1 3078.67   19.90
   5  -6   2  219.00    8.33
[truncated: 279,732 more chars]
