# Supplementary material
Source: MDPI journal article supplement (https://www.mdpi.com/2073-4352/10/12/1122)
Supplement: s1 [file s1 › Compound_3.cif]

data_Compound_3_uco3_7_0m
_audit_creation_date               2020-10-11
_audit_creation_method
;
Olex2 1.3
(compiled 2020.07.31 svn.rc2a77460 for OlexSys, GUI svn.r6145)
;
_shelx_SHELXL_version_number       '2018/3'
_audit_contact_author_address      ?
_audit_contact_author_email        ?
_audit_contact_author_name         ''
_audit_contact_author_phone        ?
_publ_contact_author_id_orcid      ?
_publ_section_references
;
Dolomanov, O.V., Bourhis, L.J., Gildea, R.J, Howard, J.A.K. & Puschmann, H.
 (2009), J. Appl. Cryst. 42, 339-341.

Sheldrick, G.M. (2015). Acta Cryst. C71, 3-8.
;
_chemical_name_common              ?
_chemical_name_systematic          ?
_chemical_formula_moiety           'Cl3 N O5 U, 2(Cs)'
_chemical_formula_sum              'Cl3 Cs2 N O5 U'
_chemical_formula_weight           704.21
_chemical_melting_point            ?
loop_
  _atom_type_symbol
  _atom_type_description
  _atom_type_scat_dispersion_real
  _atom_type_scat_dispersion_imag
  _atom_type_scat_source
 'Cl' 'Cl' 0.1484 0.1585 'International Tables Vol C Tables 4.2.6.8 and 6.1.1.4'
 'Cs' 'Cs' -0.3680 2.1192
 'International Tables Vol C Tables 4.2.6.8 and 6.1.1.4'
 'N' 'N' 0.0061 0.0033 'International Tables Vol C Tables 4.2.6.8 and 6.1.1.4'
 'O' 'O' 0.0106 0.0060 'International Tables Vol C Tables 4.2.6.8 and 6.1.1.4'
 'U' 'U' -9.6767 9.6646 'International Tables Vol C Tables 4.2.6.8 and 6.1.1.4'

_shelx_space_group_comment
;
The symmetry employed for this shelxl refinement is uniquely defined
by the following loop, which should always be used as a source of
symmetry information in preference to the above space-group names.
They are only intended as comments.
;
_space_group_crystal_system        'monoclinic'
_space_group_IT_number             14
_space_group_name_H-M_alt          'P 1 21/c 1'
_space_group_name_Hall             '-P 2ybc'
loop_
  _space_group_symop_operation_xyz
 'x, y, z'
 '-x, y+1/2, -z+1/2'
 '-x, -y, -z'
 'x, -y-1/2, z-1/2'

_cell_length_a                     12.145(5)
_cell_length_b                     7.926(3)
_cell_length_c                     11.648(5)
_cell_angle_alpha                  90
_cell_angle_beta                   97.050(8)
_cell_angle_gamma                  90
_cell_volume                       1112.8(8)
_cell_formula_units_Z              4
_cell_measurement_reflns_used      6790
_cell_measurement_temperature      100(2)
_cell_measurement_theta_max        34.69
_cell_measurement_theta_min        3.08
_shelx_estimated_absorpt_T_max     ?
_shelx_estimated_absorpt_T_min     ?
_exptl_absorpt_coefficient_mu      21.739
_exptl_absorpt_correction_T_max    0.220
_exptl_absorpt_correction_T_min    0.078
_exptl_absorpt_correction_type     'multi-scan'
_exptl_absorpt_process_details     'SADABS; Bruker, 2013'
_exptl_absorpt_special_details     ?
_exptl_crystal_colour              'yellow'
_exptl_crystal_density_diffrn      4.203
_exptl_crystal_density_meas        .
_exptl_crystal_density_method      ?
_exptl_crystal_description         'prism'
_exptl_crystal_F_000               1200
_exptl_crystal_size_max            0.24
_exptl_crystal_size_mid            0.17
_exptl_crystal_size_min            0.10
_exptl_transmission_factor_max     ?
_exptl_transmission_factor_min     ?
_diffrn_reflns_av_R_equivalents    0.0354
_diffrn_reflns_av_unetI/netI       0.0266
_diffrn_reflns_Laue_measured_fraction_full  0.998
_diffrn_reflns_Laue_measured_fraction_max  0.997
_diffrn_reflns_limit_h_max         10
_diffrn_reflns_limit_h_min         -15
_diffrn_reflns_limit_k_max         10
_diffrn_reflns_limit_k_min         -10
_diffrn_reflns_limit_l_max         15
_diffrn_reflns_limit_l_min         -15
_diffrn_reflns_number              12780
_diffrn_reflns_point_group_measured_fraction_full  0.998
_diffrn_reflns_point_group_measured_fraction_max  0.997
_diffrn_reflns_theta_full          25.242
_diffrn_reflns_theta_max           27.490
_diffrn_reflns_theta_min           3.076
_diffrn_ambient_temperature        100(2)
_diffrn_detector_area_resol_mean   ?
_diffrn_measured_fraction_theta_full  0.998
_diffrn_measured_fraction_theta_max  0.997
_diffrn_measurement_device_type    'Bruker Smart APEX-II CCD'
_diffrn_measurement_method         '\f and \w scans'
_diffrn_radiation_monochromator    'graphite'
_diffrn_radiation_type             MoK\a
_diffrn_radiation_wavelength       0.71073
_diffrn_source                     ?
_diffrn_standards_number           0
_reflns_Friedel_coverage           0.000
_reflns_Friedel_fraction_full      .
_reflns_Friedel_fraction_max       .
_reflns_number_gt                  2328
_reflns_number_total               2546
_reflns_special_details
;
 Reflections were merged by SHELXL according to the crystal
 class for the calculation of statistics and refinement.
 
 _reflns_Friedel_fraction is defined as the number of unique
 Friedel pairs measured divided by the number that would be
 possible theoretically, ignoring centric projections and
 systematic absences.
;
_reflns_threshold_expression       'I > 2\s(I)'
_computing_cell_refinement         ?
_computing_data_collection         ?
_computing_data_reduction          ?
_computing_molecular_graphics      'Olex2 1.3 (Dolomanov et al., 2009)'
_computing_publication_material    'Olex2 1.3 (Dolomanov et al., 2009)'
_computing_structure_refinement    'SHELXL (Sheldrick, 2015)'
_computing_structure_solution      'SHELXT (Sheldrick, 2015)'
_refine_diff_density_max           0.870
_refine_diff_density_min           -0.890
_refine_diff_density_rms           0.157
_refine_ls_extinction_coef         .
_refine_ls_extinction_method       none
_refine_ls_goodness_of_fit_ref     1.048
_refine_ls_hydrogen_treatment      undef
_refine_ls_matrix_type             full
_refine_ls_number_parameters       109
_refine_ls_number_reflns           2546
_refine_ls_number_restraints       0
_refine_ls_R_factor_all            0.0206
_refine_ls_R_factor_gt             0.0164
_refine_ls_restrained_S_all        1.048
_refine_ls_shift/su_max            0.000
_refine_ls_shift/su_mean           0.000
_refine_ls_structure_factor_coef   Fsqd
_refine_ls_weighting_details      
 'w=1/[\s^2^(Fo^2^)+(0.0065P)^2^+1.0023P] where P=(Fo^2^+2Fc^2^)/3'
_refine_ls_weighting_scheme        calc
_refine_ls_wR_factor_gt            0.0324
_refine_ls_wR_factor_ref           0.0337
_refine_special_details            ?
_olex2_refinement_description
;
;
_atom_sites_solution_hydrogens     .
_atom_sites_solution_primary       ?
_atom_sites_solution_secondary     ?
loop_
  _atom_site_label
  _atom_site_type_symbol
  _atom_site_fract_x
  _atom_site_fract_y
  _atom_site_fract_z
  _atom_site_U_iso_or_equiv
  _atom_site_adp_type
  _atom_site_occupancy
  _atom_site_site_symmetry_order
  _atom_site_calc_flag
  _atom_site_refinement_flags_posn
  _atom_site_refinement_flags_adp
  _atom_site_refinement_flags_occupancy
  _atom_site_disorder_assembly
  _atom_site_disorder_group
 U1 U 0.24439(2) 0.28049(2) 0.33584(2) 0.01068(4) Uani 1 1 d . . . . .
 Cs1 Cs 0.40325(2) -0.13230(3) 0.19163(2) 0.01716(6) Uani 1 1 d . . . . .
 Cs2 Cs 0.08364(2) -0.26098(3) 0.43797(2) 0.01699(6) Uani 1 1 d . . . . .
 Cl1 Cl 0.13530(7) 0.02388(13) 0.21686(9) 0.0179(2) Uani 1 1 d . . . . .
 Cl2 Cl 0.14693(8) 0.47992(13) 0.16768(9) 0.0199(2) Uani 1 1 d . . . . .
 Cl3 Cl 0.34550(8) 0.57426(12) 0.40037(9) 0.0177(2) Uani 1 1 d . . . . .
 O1 O 0.3573(2) 0.2348(3) 0.2588(2) 0.0132(6) Uani 1 1 d . . . . .
 O2 O 0.1349(2) 0.3210(4) 0.4191(2) 0.0170(6) Uani 1 1 d . . . . .
 O3 O 0.2964(2) 0.0106(3) 0.4413(2) 0.0165(6) Uani 1 1 d . . . . .
 O4 O 0.3805(2) 0.2341(4) 0.5118(3) 0.0181(6) Uani 1 1 d . . . . .
 O5 O 0.4232(2) -0.0104(4) 0.5911(3) 0.0197(6) Uani 1 1 d . . . . .
 N1 N 0.3688(3) 0.0754(4) 0.5181(3) 0.0151(7) Uani 1 1 d . . . . .

loop_
  _atom_site_aniso_label
  _atom_site_aniso_U_11
  _atom_site_aniso_U_22
  _atom_site_aniso_U_33
  _atom_site_aniso_U_23
  _atom_site_aniso_U_13
  _atom_site_aniso_U_12
 U1 0.01011(7) 0.01084(8) 0.01148(8) 0.00108(6) 0.00284(5) 0.00067(5)
 Cs1 0.01526(12) 0.01662(14) 0.01946(15) -0.00255(11) 0.00152(10) 0.00400(9)
 Cs2 0.01355(12) 0.01626(14) 0.02111(15) -0.00145(10) 0.00196(10) 0.00011(9)
 Cl1 0.0143(5) 0.0179(5) 0.0209(6) -0.0009(4) -0.0001(4) -0.0017(4)
 Cl2 0.0191(5) 0.0206(5) 0.0195(6) 0.0068(4) 0.0003(4) 0.0016(4)
 Cl3 0.0195(5) 0.0134(5) 0.0204(6) -0.0021(4) 0.0032(4) -0.0017(4)
 O1 0.0131(13) 0.0135(15) 0.0135(15) -0.0009(11) 0.0041(11) -0.0004(10)
 O2 0.0166(14) 0.0170(16) 0.0188(16) 0.0017(12) 0.0078(12) 0.0035(11)
 O3 0.0178(14) 0.0155(16) 0.0154(16) 0.0021(12) -0.0005(12) -0.0027(11)
 O4 0.0237(15) 0.0164(16) 0.0138(16) -0.0003(12) 0.0001(12) 0.0009(11)
 O5 0.0213(15) 0.0226(17) 0.0143(16) 0.0062(13) -0.0011(12) 0.0058(12)
 N1 0.0166(16) 0.0180(19) 0.0120(18) -0.0016(15) 0.0071(14) 0.0009(14)

_geom_special_details
;
 All esds (except the esd in the dihedral angle between two l.s. planes)
 are estimated using the full covariance matrix.  The cell esds are taken
 into account individually in the estimation of esds in distances, angles
 and torsion angles; correlations between esds in cell parameters are only
 used when they are defined by crystal symmetry.  An approximate (isotropic)
 treatment of cell esds is used for estimating esds involving l.s. planes.
;
loop_
  _geom_bond_atom_site_label_1
  _geom_bond_atom_site_label_2
  _geom_bond_distance
  _geom_bond_site_symmetry_2
  _geom_bond_publ_flag
 U1 Cl1 2.7133(12) . ?
 U1 Cl2 2.6772(12) . ?
 U1 Cl3 2.6960(13) . ?
 U1 O1 1.766(3) . ?
 U1 O2 1.768(3) . ?
 U1 O3 2.508(3) . ?
 U1 O4 2.497(3) . ?
 O3 N1 1.282(4) . ?
 O4 N1 1.269(4) . ?
 O5 N1 1.218(4) . ?

loop_
  _geom_angle_atom_site_label_1
  _geom_angle_atom_site_label_2
  _geom_angle_atom_site_label_3
  _geom_angle
  _geom_angle_site_symmetry_1
  _geom_angle_site_symmetry_3
  _geom_angle_publ_flag
 Cl2 U1 Cl1 85.67(4) . . ?
 Cl2 U1 Cl3 80.76(4) . . ?
 Cl3 U1 Cl1 165.23(3) . . ?
 O1 U1 Cl1 87.00(9) . . ?
 O1 U1 Cl2 92.88(9) . . ?
 O1 U1 Cl3 87.89(9) . . ?
 O1 U1 O2 177.11(13) . . ?
 O1 U1 O3 84.79(11) . . ?
 O1 U1 O4 84.81(11) . . ?
 O2 U1 Cl1 93.64(10) . . ?
 O2 U1 Cl2 89.97(10) . . ?
 O2 U1 Cl3 92.15(10) . . ?
 O2 U1 O3 92.73(11) . . ?
 O2 U1 O4 92.48(12) . . ?
 O3 U1 Cl1 71.86(7) . . ?
 O3 U1 Cl2 157.50(7) . . ?
 O3 U1 Cl3 121.42(7) . . ?
 O4 U1 Cl1 122.77(7) . . ?
 O4 U1 Cl2 151.17(7) . . ?
 O4 U1 Cl3 70.45(7) . . ?
 O4 U1 O3 51.03(9) . . ?
 N1 O3 U1 96.3(2) . . ?
 N1 O4 U1 97.2(2) . . ?
 O3 N1 U1 57.98(18) . . ?
 O4 N1 U1 57.43(19) . . ?
 O4 N1 O3 115.4(3) . . ?
 O5 N1 U1 177.8(2) . . ?
 O5 N1 O3 122.0(3) . . ?
 O5 N1 O4 122.6(3) . . ?

loop_
  _geom_torsion_atom_site_label_1
  _geom_torsion_atom_site_label_2
  _geom_torsion_atom_site_label_3
  _geom_torsion_atom_site_label_4
  _geom_torsion
  _geom_torsion_site_symmetry_1
  _geom_torsion_site_symmetry_2
  _geom_torsion_site_symmetry_3
  _geom_torsion_site_symmetry_4
  _geom_torsion_publ_flag
 U1 O3 N1 O4 1.9(3) . . . . ?
 U1 O3 N1 O5 -177.4(3) . . . . ?
 U1 O4 N1 O3 -1.9(3) . . . . ?
 U1 O4 N1 O5 177.4(3) . . . . ?

_shelx_res_file
;
TITL uco3_7_0m_a.res in P2(1)/c
    uco3_7_0m.res
    created by SHELXL-2018/3 at 01:41:05 on 11-Oct-2020
REM Old TITL UCO3_7_0m in P2(1)/c
REM SHELXT solution in P2(1)/c
REM R1 0.061, Rweak 0.003, Alpha 0.012, Orientation as input
REM Formula found by SHELXT: O4 Cl5 Cs2 U
CELL 0.71073 12.1447 7.9263 11.648 90 97.05 90
ZERR 4 0.0049 0.0032 0.0048 0 0.008 0
LATT 1
SYMM -X,0.5+Y,0.5-Z
SFAC Cl Cs N O U
UNIT 12 8 4 20 4

L.S. 20
PLAN  5
SIZE 0.24 0.17 0.1
TEMP -173(2)
CONF
CONN 0 $Cs
CONN 7 $U
htab
list 4
fmap 2
acta
MORE -1
OMIT -4 55
OMIT 1 0 0
REM <olex2.extras>
REM <HklSrc "%.\\UCO3_7_0m.hkl">
REM </olex2.extras>

WGHT    0.006500    1.002300
FVAR       0.17861
U1    5    0.244386    0.280491    0.335844    11.00000    0.01011    0.01084 =
         0.01148    0.00108    0.00284    0.00067
CS1   2    0.403247   -0.132300    0.191627    11.00000    0.01526    0.01662 =
         0.01946   -0.00255    0.00152    0.00400
CS2   2    0.083637   -0.260984    0.437968    11.00000    0.01355    0.01626 =
         0.02111   -0.00145    0.00196    0.00011
CL1   1    0.135304    0.023881    0.216859    11.00000    0.01428    0.01793 =
         0.02090   -0.00086   -0.00011   -0.00169
CL2   1    0.146929    0.479916    0.167677    11.00000    0.01909    0.02061 =
         0.01953    0.00682    0.00031    0.00160
CL3   1    0.345503    0.574258    0.400367    11.00000    0.01948    0.01342 =
         0.02041   -0.00212    0.00325   -0.00175
O1    4    0.357297    0.234819    0.258794    11.00000    0.01306    0.01348 =
         0.01355   -0.00088    0.00412   -0.00044
O2    4    0.134936    0.321005    0.419118    11.00000    0.01665    0.01699 =
         0.01879    0.00169    0.00781    0.00348
O3    4    0.296426    0.010645    0.441250    11.00000    0.01783    0.01548 =
         0.01543    0.00205   -0.00052   -0.00274
O4    4    0.380542    0.234074    0.511772    11.00000    0.02366    0.01638 =
         0.01376   -0.00031    0.00008    0.00092
O5    4    0.423155   -0.010406    0.591110    11.00000    0.02130    0.02262 =
         0.01431    0.00622   -0.00112    0.00582
N1    3    0.368828    0.075386    0.518053    11.00000    0.01661    0.01795 =
         0.01195   -0.00161    0.00706    0.00088
HKLF 4


REM  uco3_7_0m_a.res in P2(1)/c
REM wR2 = 0.0337, GooF = S = 1.048, Restrained GooF = 1.048 for all data
REM R1 = 0.0164 for 2328 Fo > 4sig(Fo) and 0.0206 for all 2546 data
REM 109 parameters refined using 0 restraints

END

WGHT      0.0065      1.0023

REM No hydrogen bonds found for HTAB generation

REM Highest difference peak  0.870,  deepest hole -0.890,  1-sigma level  0.157
Q1    1   0.0687 -0.3156  0.3765  11.00000  0.05    0.87
Q2    1   0.2158  0.1943  0.3647  11.00000  0.05    0.79
Q3    1   0.2259  0.3494  0.3748  11.00000  0.05    0.78
Q4    1   0.3783 -0.1959  0.2317  11.00000  0.05    0.77
Q5    1   0.1416  0.2991  0.3609  11.00000  0.05    0.72
;
_shelx_res_checksum                37232
_shelx_hkl_file
;
   0   0   1   -2.00    0.40
   0   0   1   -1.30    0.40
   0   0  -1   -0.80    0.70
   0   0  -1   -0.90    0.40
   0   0  -1   -0.60    0.80
   0   0   2  726.03   25.80
   0   0  -2  730.73   27.60
   0   0  -2  748.83   27.80
   0   0   2  774.92   27.40
   0   0  -3    0.30    2.20
   0   0   3   -1.40    1.50
   0   0  -3   -1.80    1.90
   0   0   3    3.90    2.10
   0   0   4  483.05   18.80
   0   0  -4  479.45   20.90
   0   0  -4  519.35   20.70
   0   0   4  489.35   19.70
   0   0   5   -0.20    2.50
   0   0   5    1.90    1.90
   0   0  -5    3.80    3.00
   0   0   6 1127.99   41.00
   0   0  -6 1072.59   43.30
   0   0   6 1023.90   39.00
   0   0   7   -3.10    2.80
   0   0  -7    0.20    3.30
   0   0   7   -2.10    1.80
   0   0   8 3108.49  107.49
   0   0  -8 3003.40  116.79
   0   0   8 3186.08  112.89
   0   0  -9    4.90    5.20
   0   0   9    2.80    3.90
   0   0  10  143.89   10.90
   0   0 -10  152.58   16.10
   0   0  11   -0.60    5.10
   0   0 -11   -8.70    5.40
   0   0 -12  634.14   36.00
   0   0  12  636.44   28.70
   0   0  13    1.00    6.20
   0   0 -13    1.70    8.40
   0   0 -14   21.50   11.50
   0   0  14   20.50    8.20
   0   0  15   -1.10    7.80
   0   0 -15   -7.20   10.50
   0   0  16    6.30    8.60
   0   0  17   -0.20    8.90
   0   0  18  176.58   19.50
   0   1   0   -5.60    0.50
   0   1   0   -7.20    2.30
   0   1   0   -4.80    1.80
   0  -1   0   -4.80    0.60
   0  -1   0   -4.50    1.40
   0  -1   0   -4.60    0.50
   0   1  -1   96.49    4.20
   0   1   1   97.69    7.80
   0   1  -1   90.39    6.70
   0   1   1   98.39    5.40
   0  -1   1   96.89    4.20
   0  -1   1  102.99    4.60
   0  -1  -1   99.79    4.30
   0  -1  -1   94.59    7.70
   0   1  -2 1416.16   51.59
   0   1   2 1365.86   51.29
   0   1  -2 1366.06   49.10
   0   1   2 1330.57   47.40
   0  -1  -2 1357.66   49.30
   0  -1   2 1387.56   46.70
   0  -1  -2 1332.57   51.79
   0  -1   2 1408.16   49.10
   0   1   3 1050.19   36.50
   0   1  -3  992.90   39.90
   0   1   3 1063.49   39.40
   0   1  -3 1033.90   37.50
   0  -1  -3  987.30   33.50
   0  -1  -3 1049.79   37.90
   0  -1   3  990.00   37.20
   0  -1   3 1023.10   35.60
   0   1   4 8032.40  273.77
   0   1  -4 8096.49  291.87
   0   1   4 8288.77  290.57
   0  -1   4 8217.88  288.77
   0  -1   4 8013.00  273.07
   0  -1  -4 8403.46  289.87
   0  -1  -4 8236.78  264.37
   0   1   5  308.37   14.50
   0   1   5  284.67   13.30
   0   1  -5  300.77   16.40
   0  -1  -5  297.67   14.20
   0  -1   5  286.27   12.60
   0  -1   5  297.97   12.90
   0   1   6   42.00    5.50
   0   1   6   45.30    5.50
   0   1  -6   47.50    7.30
   0  -1   6   44.30    4.30
   0  -1   6   48.30    5.00
   0  -1  -6   36.80    5.60
   0   1   7  172.98   10.80
   0   1  -7  194.18   14.00
   0   1   7  192.48   10.80
   0  -1   7  201.48    9.90
   0  -1  -7  174.58   11.90
   0  -1   7  193.68   10.10
   0   1   8  698.03   28.80
   0   1  -8  730.23   34.20
   0   1   8  725.43   29.90
   0  -1   8  690.03   28.00
   0  -1  -8  698.33   32.10
   0  -1   8  730.03   28.60
   0   1   9    8.20    5.10
   0   1  -9    7.30    5.80
   0  -1  -9    7.30    4.90
   0  -1   9   12.00    4.50
   0   1  10  409.86   20.10
   0   1 -10  378.16   25.20
   0  -1 -10  397.86   23.70
   0  -1  10  439.66   20.00
   0   1 -11   17.60    8.60
   0   1  11   30.30    7.30
   0  -1  11   54.39    7.90
   0  -1 -11   47.90   10.00
   0   1  12  204.48   14.80
   0   1 -12  178.88   20.50
   0  -1  12  194.88   13.90
   0  -1 -12  192.68   19.80
   0   1  13   43.20    8.70
   0   1 -13   32.80   11.90
   0  -1  13   40.00    8.40
   0  -1 -13   25.10   10.10
   0   1  14  347.67   21.60
   0   1 -14  394.56   31.00
   0  -1  14  384.76   21.40
   0  -1 -14  332.37   28.10
   0   1 -15   22.40   13.00
   0   1  15   -2.70    7.80
   0  -1 -15   24.10   12.80
   0  -1  15    1.20    7.80
   0   1  16  105.29   14.40
   0  -1  16   76.09   13.00
   0   1  17   -7.30    9.40
   0  -1  17   -0.80    9.10
   0   1  18   19.80   11.90
   0  -1  18   24.90   12.10
   0   2   0 3664.43  134.89
   0   2   0 3659.33  124.29
   0  -2   0 3660.03  129.29
   0  -2   0 3612.54  123.59
   0   2  -1 1725.23   65.09
   0   2   1 1717.73   58.89
   0   2   1 1560.04   65.59
   0  -2   1 1686.43   59.79
   0  -2   1 1669.83   57.69
   0  -2  -1 1659.93   59.99
   0   2  -2   21.60    5.70
   0   2   2   17.80    6.10
   0   2   2   19.80    4.20
   0  -2   2   14.10    2.90
   0  -2   2   15.70    1.90
   0  -2  -2   16.90    2.30
   0   2   3  295.37   13.80
   0   2  -3  317.47   17.30
   0   2   3  308.07   16.90
   0  -2   3  294.57   12.10
   0  -2  -3  294.47   12.70
   0  -2   3  305.17   12.70
   0   2  -4  171.48   13.20
   0   2   4  186.18   12.70
   0   2   4  195.48   10.90
   0  -2   4  190.88    9.30
   0  -2  -4  206.48    9.90
   0  -2   4  193.38    8.70
   0  -2  -4  198.58    7.60
   0   2   5  725.63   30.40
   0   2   5  686.03   27.30
   0   2  -5  699.53   32.00
   0  -2   5  709.73   26.60
   0  -2  -5  694.63   28.00
   0  -2   5  675.53   26.20
   0  -2  -5  665.63   23.40
   0   2   6  474.05   21.10
   0   2  -6  515.15   25.90
   0   2   6  485.55   23.10
   0  -2  -6  470.75   21.60
   0  -2   6  510.95   20.00
   0  -2  -6  476.15   17.10
   0  -2   6  519.65   20.20
   0   2  -7 1185.28   52.29
   0   2   7 1253.47   48.90
   0   2   7 1236.08   45.80
   0  -2  -7 1235.68   48.40
   0  -2   7 1227.18   45.80
   0  -2   7 1170.68   44.50
   0   2   8  709.43   29.80
   0   2   8  777.42   32.00
   0   2  -8  712.53   36.00
   0  -2   8  728.73   28.80
   0  -2   8  718.53   28.80
   0  -2  -8  697.23   31.90
   0   2  -9  156.68   16.70
   0   2   9  147.59   11.30
   0  -2   9  151.28   10.70
   0  -2  -9  157.88   12.80
   0   2 -10  844.92   43.90
   0   2  10  887.31   36.40
   0  -2 -10  863.61   40.40
   0  -2  10  904.11   35.50
   0   2 -11    2.40    7.90
   0   2  11    7.80    6.20
   0  -2  11    0.00    4.90
   0  -2 -11    4.50    6.30
   0   2 -12  472.45   31.60
   0   2  12  435.96   22.90
   0  -2  12  440.86   22.00
   0  -2 -12  372.76   26.20
   0   2 -13   83.59   16.70
   0   2  13   60.09   10.40
   0  -2  13   68.29    9.80
   0  -2 -13   45.60   11.80
   0   2 -14    5.30   11.10
   0   2  14    0.60    7.90
   0  -2 -14   16.20   10.20
   0  -2  14   -3.10    6.80
   0   2 -15   17.10   13.50
   0   2  15   -1.50    8.10
   0  -2  15    4.90    8.10
   0   2  16   20.20   10.30
   0  -2  16   10.00    9.80
   0   2  17    2.50   10.50
   0  -2  17   18.60   11.00
   0   2  18  140.19   18.30
   0  -2  18  190.58   20.30
   0   3   0   -0.30    4.00
   0   3   0   -4.20    5.40
   0  -3   0    0.00    1.40
   0  -3   0   -2.10    3.50
   0   3  -1 1401.96   52.99
   0   3   1 1404.86   60.89
   0   3   1 1410.16   52.69
   0   3  -1 1475.25   60.39
   0  -3   1 1528.25   52.49
   0  -3  -1 1413.06   52.59
   0  -3   1 1458.15   51.59
   0   3   2  194.18   11.80
   0   3  -2  219.98   16.10
   0   3   2  204.38   17.10
   0  -3  -2  199.18    9.50
   0  -3   2  221.58   10.90
   0  -3   2  207.48    9.20
   0   3   3 1792.12   65.49
   0   3  -3 1851.51   73.49
   0   3   3 1806.12   73.69
   0  -3  -3 1896.11   66.69
   0  -3   3 1784.22   66.09
   0  -3   3 1832.52   64.09
   0   3  -4 1593.84   67.19
   0   3   4 1577.14   59.79
   0   3   4 1650.93   66.89
   0  -3  -4 1685.23   60.99
   0  -3   4 1714.43   60.19
   0  -3   4 1649.33   58.39
   0   3  -5  375.06   22.70
   0   3   5  374.96   18.00
   0   3   5  367.56   21.20
   0  -3   5  389.66   16.60
   0  -3  -5  382.56   17.00
   0  -3  -5  371.06   14.00
   0  -3   5  376.36   15.70
   0   3  -6  894.31   41.90
   0   3   6  887.01   35.20
   0   3   6  909.51   39.50
   0  -3   6  896.01   33.80
   0  -3  -6  880.11   30.30
   0  -3  -6  886.81   35.70
   0  -3   6  854.11   33.70
   0   3   7    1.10    4.30
   0   3   7    3.50    4.90
   0   3  -7    0.60    5.70
   0  -3  -7    3.20    3.30
   0  -3  -7    3.10    2.20
   0  -3   7    6.70    3.70
   0  -3   7    3.50    2.00
   0   3  -8  448.96   28.20
   0   3   8  457.35   21.90
   0  -3   8  491.65   20.90
   0  -3  -8  438.06   22.50
   0   3  -9  940.51   47.20
   0   3   9  971.30   38.90
   0  -3  -9  912.71   40.90
   0  -3   9  950.90   37.50
   0   3 -10    9.30    8.90
   0   3  10    2.50    6.20
   0  -3 -10    7.90    6.00
   0  -3  10   18.90    6.10
   0   3 -11  236.48   25.00
   0   3  11  275.97   17.70
   0  -3  11  286.57   16.80
   0  -3 -11  261.17   19.70
   0   3  12    6.90    7.70
   0   3 -12    8.10   10.30
   0  -3  12    8.30    6.20
   0  -3 -12    1.70    7.50
   0   3 -13    7.00   10.30
   0   3  13   -3.00    7.40
   0  -3 -13   -6.60    7.60
   0  -3  13   -8.20    5.60
   0   3 -14  927.81   55.39
   0   3  14  958.80   42.50
   0  -3  14  994.90   41.80
   0  -3 -14  820.72   48.10
   0   3  15   22.60   10.80
   0  -3  15   19.20    9.10
   0   3  16  135.59   16.80
   0  -3  16  161.08   17.40
   0   3  17    5.00   11.20
   0  -3  17    2.30   10.30
   0   3  18   73.59   15.90
   0  -3  18   87.29   16.00
   0   4   0 2336.37   98.49
   0   4   0 2488.45   87.69
   0  -4   0 2369.36   86.49
   0  -4   0 2552.54   88.49
   0   4  -1 1119.49   50.79
   0   4   1 1026.60   41.80
   0   4  -1 1120.99   42.70
   0   4   1  959.60   49.70
   0  -4   1 1068.89   40.90
   0  -4   1 1050.49   40.00
   0  -4   1 1125.49   40.40
   0  -4  -1 1108.69   40.50
   0   4  -2  242.98   19.80
   0   4   2  238.78   14.60
   0   4   2  214.98   21.40
   0   4  -2  273.07   16.10
   0  -4   2  256.87   13.40
   0  -4  -2  241.68   11.70
   0  -4   2  281.97   11.50
   0   4  -3   -1.10    4.80
   0   4   3    7.80    4.50
   0   4  -3    2.50    5.90
   0   4   3    5.30    6.50
   0  -4   3   -1.40    3.10
   0  -4   3    4.10    1.90
   0  -4  -3    0.90    1.80
   0   4   4  153.28   16.70
   0   4   4  150.28   11.20
   0   4  -4  157.38   16.90
   0  -4   4  166.88   10.40
   0  -4  -4  150.28    8.80
   0  -4   4  139.99    7.80
   0   4   5  614.24   32.50
   0   4  -5  588.74   33.30
   0   4   5  563.54   26.40
   0  -4  -5  608.44   25.40
   0  -4   5  614.14   24.20
   0  -4   5  625.34   25.20
   0   4  -6    9.40    7.40
   0   4   6   11.80    6.70
   0   4   6   12.20    5.50
   0  -4   6   11.60    4.40
   0  -4   6    6.10    2.50
   0  -4  -6   22.50    4.40
   0  -4  -6   11.30    2.90
   0   4   7  140.69   15.00
   0   4  -7   92.69   14.70
   0   4   7  131.19   12.40
   0  -4   7  142.19   10.60
   0  -4  -7  138.89    7.10
   0  -4  -7  132.39   10.30
   0   4  -8   98.09   15.40
   0   4   8  125.19   12.10
   0  -4   8  132.99   11.20
   0  -4  -8  110.29   10.90
   0   4   9    7.80    6.20
   0   4  -9   21.70   10.30
   0  -4  -9   32.70    7.00
   0  -4   9   33.20    6.80
   0   4 -10 1078.39   58.59
   0   4  10 1231.28   48.90
   0  -4  10 1286.97   48.00
   0  -4 -10 1140.19   51.09
   0   4 -11   82.89   16.90
   0   4  11   75.59   11.30
   0  -4  11   56.29    9.10
   0  -4 -11   65.89   10.90
   0   4 -12  503.15   36.50
   0   4  12  447.26   24.90
   0  -4  12  435.06   23.90
   0  -4 -12  440.26   28.00
   0   4 -13  168.58   25.20
   0   4  13  177.88   17.00
   0  -4 -13  133.59   17.50
   0  -4  13  148.09   15.00
   0   4  14   41.90   11.50
   0   4 -14   21.60   14.60
   0  -4  14   52.99   11.00
   0   4  15   36.30   11.70
   0  -4  15    5.90    8.80
   0   4  16   71.19   14.20
   0  -4  16   89.09   14.10
   0   4  17  105.29   17.30
   0  -4  17  102.99   16.70
   0   5   0   -6.10    7.30
   0   5   0    8.50    5.70
   0  -5   0   -0.20    1.90
   0  -5   0    3.50    4.70
   0   5   1  161.58   12.40
   0   5  -1  121.79   12.60
   0   5  -1  168.38   20.30
   0   5   1  151.68   19.80
   0  -5   1  132.19    8.10
   0  -5   1  160.88   11.40
   0  -5  -1  148.79    8.50
   0   5   2  349.27   26.40
   0   5  -2  335.67   25.70
   0   5   2  299.87   18.20
   0   5  -2  293.77   18.50
   0  -5   2  323.67   16.80
   0  -5  -2  319.17   14.50
   0  -5   2  304.17   14.00
   0  -5   2  317.17   14.30
   0   5  -3  191.18   14.80
   0   5  -3  208.18   22.60
   0   5   3  221.38   14.30
   0   5   3  200.08   21.80
   0  -5   3  180.48    9.60
   0  -5  -3  178.28   10.30
   0  -5   3  183.08   12.20
   0   5   4  314.37   17.80
   0   5  -4  322.17   19.20
   0   5   4  342.37   25.10
   0   5  -4  300.47   24.40
   0  -5   4  308.77   14.00
   0  -5   4  320.67   16.80
   0  -5  -4  283.67   14.70
   0   5   5   17.80    9.30
   0   5  -5   34.30   10.50
   0   5  -5   23.50    7.90
   0   5   5   26.70    7.30
   0  -5   5   31.30    6.30
   0  -5  -5   28.00    4.80
   0  -5   5   28.00    3.90
   0   5  -6  786.52   43.10
   0   5   6  753.62   33.90
   0  -5  -6  776.82   32.50
   0  -5   6  765.92   32.40
   0   5   7  168.78   14.70
   0   5  -7  150.98   20.20
   0  -5  -7  159.08    8.60
   0  -5   7  141.29   12.50
   0  -5  -7  153.78   11.30
   0   5  -8  401.36   29.90
   0   5   8  382.66   21.80
   0  -5   8  400.56   20.40
   0  -5  -8  349.27   20.00
   0   5   9  436.76   23.80
   0   5  -9  399.56   31.80
   0  -5   9  449.16   22.40
   0  -5  -9  405.06   22.90
   0   5  10   -2.60    7.10
   0   5 -10    0.60   10.00
   0  -5 -10    7.50    6.30
   0  -5  10    0.00    5.40
   0   5 -11   29.70   14.30
   0   5  11   18.60    9.40
   0  -5 -11   26.80    8.60
   0  -5  11   45.20    9.10
   0   5 -12   17.60   14.50
   0   5  12    4.10    8.90
   0  -5  12    2.60    6.90
   0   5 -13  224.58   30.20
   0   5  13  266.97   19.90
   0  -5  13  262.17   18.90
   0   5  14  354.96   24.60
   0  -5  14  370.66   24.00
   0   5  15  107.59   16.60
   0  -5  15  138.49   17.10
   0   5  16   71.39   15.10
   0  -5  16   74.99   14.40
   0   5  17    6.30   13.10
   0  -5  17   15.10   11.80
   0   6   0  597.14   29.30
   0   6   0  557.64   38.10
   0  -6   0  604.64   28.80
   0  -6   0  618.34   25.10
   0   6   1   30.50   12.50
   0   6  -1   24.80   11.50
   0   6   1    9.40    6.30
   0   6  -1    6.90    6.70
   0  -6   1   23.30    4.00
   0  -6  -1   14.10    3.50
   0  -6   1   15.50    6.20
   0   6  -2  227.58   16.90
   0   6   2  184.48   23.90
   0   6  -2  198.28   24.00
   0   6   2  205.98   15.80
   0  -6   2  248.58   15.70
   0  -6  -2  236.98   12.20
   0  -6   2  237.08   12.00
   0   6  -3   18.70    7.70
   0   6   3   33.20   12.50
   0   6   3   22.10    7.70
   0   6  -3   19.30   10.80
   0  -6   3   24.10    4.20
   0  -6   3   29.90    7.30
   0  -6   3   21.20    3.80
   0  -6  -3   29.50    4.80
   0   6  -4   57.69   14.50
   0   6   4   43.70    9.20
   0   6  -4   34.20    9.60
   0   6   4   59.59   14.50
   0  -6   4   29.30    7.30
   0  -6  -4   51.79    6.30
   0   6  -5  997.30   54.09
   0   6  -5  945.21   43.90
   0   6   5  984.00   42.90
   0  -6   5 1077.99   42.10
   0  -6  -5 1022.40   40.90
   0   6  -6   -0.60    9.10
   0   6  -6    4.50    7.50
   0   6   6    3.60    7.00
   0  -6  -6   19.70    5.10
   0  -6   6    4.70    5.90
   0   6   7   87.99   12.30
   0   6  -7  114.39   14.90
   0   6  -7  146.59   21.40
   0  -6   7  100.09   11.40
   0  -6  -7   89.89    7.60
   0  -6  -7   85.19    9.40
   0   6  -8   50.49   14.70
   0   6  -8   36.30   11.50
   0   6   8   46.50   10.10
   0  -6   8   57.79    9.80
   0  -6  -8   36.40    7.30
   0   6   9  360.76   22.20
   0   6  -9  359.46   36.20
   0   6  -9  340.17   24.20
   0  -6  -9  357.56   21.30
   0  -6   9  378.66   21.40
   0   6 -10  179.78   19.50
   0   6  10  192.68   17.60
   0   6 -10  162.78   24.50
   0  -6 -10  161.28   15.70
   0  -6  10  170.68   16.30
   0   6  11  567.54   30.30
   0   6 -11  585.54   33.20
   0   6 -11  487.85   41.50
   0  -6  11  610.54   29.90
   0   6 -12  106.19   17.00
   0   6  12   87.79   14.40
   0  -6  12   81.69   12.90
   0   6  13  322.57   23.80
   0   6 -13  345.77   26.30
   0  -6  13  321.17   22.10
   0   6  14   -3.60   10.20
   0   6 -14   -1.30   13.10
   0  -6  14    5.30    9.00
   0   6  15   93.09   16.40
   0  -6  15   90.19   15.10
   0   6  16    7.10   12.50
   0  -6  16   -3.60   10.70
   0   7   0    1.70    6.50
   0   7   0   -0.80   10.90
   0  -7   0    5.60    6.60
   0  -7   0   -1.90    2.70
   0   7   1  420.06   35.50
   0   7   1  443.36   25.40
   0   7  -1  500.95   26.80
   0   7  -1  497.75   37.40
   0  -7   1  477.15   25.40
   0  -7  -1  467.45   21.30
   0   7   2   -1.10    7.00
   0   7   2   10.30   12.20
   0   7  -2    6.40    7.50
   0   7  -2   22.20   13.20
   0  -7   2    4.60    6.20
   0  -7  -2    4.20    3.20
   0   7   3  256.27   18.50
   0   7  -3  291.37   30.90
   0   7  -3  229.48   20.30
   0  -7  -3  283.87   14.80
   0  -7   3  256.97   18.20
   0   7  -4 1172.68   50.29
   0   7  -4 1067.29   61.69
   0   7   4 1218.88   49.70
   0  -7  -4 1126.19   46.10
   0  -7   4 1176.38   48.40
   0   7  -5  112.19   15.10
   0   7   5  135.89   14.90
   0   7  -5  123.69   21.40
   0  -7  -5  133.99   10.50
   0  -7   5  126.49   13.60
   0   7  -6   -7.90   10.60
   0   7   6    1.20    7.60
   0   7  -6    7.00    8.60
   0  -7  -6    7.50    4.70
   0  -7   6    4.10    6.80
   0   7   7  231.48   17.90
   0   7  -7  203.18   28.20
   0   7  -7  263.67   22.60
   0  -7   7  215.38   16.70
   0  -7  -7  219.28   12.30
   0   7  -8   23.20   14.60
   0   7  -8    1.80    9.50
   0   7   8   19.70    9.10
   0  -7   8   16.60    8.30
   0   7  -9  775.12   39.60
   0   7   9  726.63   36.70
   0   7  -9  717.03   49.80
   0  -7   9  754.72   36.10
   0   7 -10   15.50   11.70
   0   7  10    0.30    9.80
   0  -7  10   -2.60    7.00
   0   7  11    7.90    9.20
   0   7 -11   -9.40   11.20
   0  -7  11    5.30    7.50
   0   7 -12   91.59   17.30
   0   7  12   91.09   15.00
   0  -7  12   79.39   14.10
   0   7 -13  340.27   28.80
   0   7  13  304.77   23.90
   0  -7  13  298.37   23.60
   0   7  14   22.70   12.80
   0  -7  14   33.80   12.20
   0   7  15  351.16   27.00
   0  -7  15  337.57   26.80
   0   8   0  878.61   41.50
   0   8   1  180.28   18.60
   0   8  -1  199.18   19.30
   0  -8   1  170.48   17.20
   0   8   2   27.00   10.00
   0   8  -2   21.50   10.00
   0   8  -2   46.90   17.80
   0  -8   2   16.60    8.30
   0   8   3   34.90    9.80
   0   8  -3   48.70   11.10
   0   8  -3   35.00   16.70
   0  -8   3   41.10   10.20
   0   8   4   11.60    9.10
   0   8  -4   16.60    9.60
   0   8  -4   38.10   16.70
   0  -8   4   23.40    8.90
   0   8  -5  516.95   42.50
   0   8   5  560.44   30.50
   0   8  -5  481.75   29.70
   0  -8   5  572.74   29.70
   0   8  -6    6.20    9.60
   0   8   6   -3.80    8.80
   0  -8   6    2.40    7.80
   0   8   7  166.28   18.10
   0   8  -7  176.98   19.90
   0  -8  -7  162.78   11.30
   0  -8   7  176.38   17.60
   0   8   8  519.55   29.30
   0   8  -8  406.56   28.80
   0  -8   8  516.15   28.70
   0   8   9   75.89   14.20
   0   8  -9   74.19   15.70
   0  -8   9   89.89   13.60
   0   8  10   10.60   10.00
   0   8 -10   20.00   13.10
   0  -8  10   10.60    9.60
   0   8 -11  190.68   22.80
   0   8  11  171.88   19.50
   0  -8  11  162.28   19.00
   0   8 -12    2.00   13.00
   0   8  12  -16.80   10.30
   0  -8  12   -9.60    8.50
   0   8  13  135.49   18.90
   0  -8  13  180.08   21.00
   0   8  14   -8.10   11.70
   0  -8  14   11.50   12.20
   0   9   0  -14.50    8.30
   0   9  -1  274.87   24.10
   0   9   1  264.67   20.80
   0   9   2    2.60    9.60
   0   9  -2   -1.30    9.00
   0  -9   2   11.70    8.60
   0   9  -3  456.45   29.50
   0   9   3  560.14   30.50
   0  -9   3  468.45   29.10
   0   9   4  122.39   16.30
   0   9  -4  109.09   16.30
   0  -9   4  109.39   15.50
   0   9  -5  198.38   21.10
   0   9   5  157.08   18.70
   0  -9   5  176.68   18.70
   0   9   6  -12.20    9.30
   0   9  -6   -8.40    9.70
   0  -9   6   -1.00    8.80
   0   9   7   33.30   12.30
   0   9  -7   40.30   13.20
   0  -9   7   29.90   11.30
   0   9  -8   52.89   14.60
   0   9   8   35.00   12.50
   0  -9   8   63.79   13.30
   0   9  -9  547.85   34.00
   0   9   9  491.95   32.00
   0  -9   9  633.84   34.20
   0   9 -10   -8.60   12.30
   0   9  10  -19.90   10.80
   0  -9  10    5.10    9.30
   0   9 -11   30.80   15.00
   0   9  11   11.20   11.80
   0  -9  11   28.70   12.50
   0   9  12  241.98   23.80
   0  -9  12  200.78   23.20
   0   9  13   45.60   15.40
   0  -9  13   25.80   13.80
   0  10   0   30.70   12.70
   0  10  -1  528.05   31.50
   0  10   1  471.45   30.50
   0  10  -2   11.70   11.80
   0  10   2   56.79   14.00
   0  10   3   28.40   12.00
   0  10  -3   33.10   12.80
   0 -10   3   22.00   10.70
   0  10   4   38.00   13.50
   0  10  -4   36.40   13.20
   0 -10   4   27.50   11.50
   0  10   5  798.42   42.00
   0  10  -5  843.92   43.00
   0 -10   5  816.82   43.00
   0  10  -6   99.49   18.20
   0  10   6   90.19   16.20
   0 -10  -6   73.59   10.00
   0 -10   6   67.99   15.30
   0  10   7  314.97   27.60
   0  10  -7  353.06   29.50
   0 -10   7  328.97   26.20
   0  10  -8   54.19   16.10
   0  10   8   50.69   14.50
   0 -10   8   31.00   13.30
   0  10   9   22.30   13.30
   0  10  -9   32.50   15.20
   0 -10   9   23.40   12.60
   0  10 -10   29.90   15.70
   0  10  10    1.70   11.70
   0 -10  10    1.50   11.90
   0  10  11    8.10   13.50
   0 -10  11   21.40   14.00
   0  11   0  -23.40   10.90
   0  11  -1  292.57   27.00
   0  11   1  264.27   25.80
   0  11  -2  223.88   24.00
   0  11   2  235.48   24.40
   0  11   3  415.06   29.10
   0  11  -3  366.06   28.30
   0  11  -4   31.60   14.60
   0  11   4   33.70   14.00
   0 -11   4    9.40   11.90
   0  11   5  175.18   21.40
   0  11  -5  186.58   23.10
   0 -11  -5  159.08   15.30
   0 -11   5  193.08   23.10
   0  11  -6   20.30   14.40
   0  11   6    1.10   12.30
   0 -11   6    4.60   10.80
   0  11  -7  -11.90   13.40
   0  11   7   18.30   13.00
   0 -11   7   -3.80   11.50
   0  11  -8   23.50   15.10
   0  11   8   11.60   13.70
   0 -11   8   32.60   14.80
   0  11   9  321.47   29.30
   0  11  -9  405.06   30.70
   0 -11   9  389.46   31.00
   0  12   0   78.19   17.80
   0  12   1  118.59   20.30
   0  12  -1  138.79   21.10
   0  12  -2  262.17   26.00
   0  12   2  195.48   24.00
   0  12   3   69.59   17.30
   0  12  -3   53.09   17.10
   0  12   4   32.20   15.60
   0  12  -4   15.50   15.20
   0 -12  -4   18.10    9.40
   0  12  -5  207.88   24.30
   0  12   5  194.18   23.80
   0  12  -6  348.67   29.90
   0  12   6  324.27   29.50
   0 -12   6  246.48   27.90
   0  12  -7  124.79   21.20
  -1   0  18  189.08   20.40
  -1   0  17    9.50   10.10
  -1   0  16  181.48   17.70
  -1   0  15   -1.80    7.00
  -1   0  14   85.79   11.60
   1   0 -14   75.79   15.70
  -1   0  13    2.80    6.30
   1   0 -13   -1.80    7.70
  -1   0  12  436.96   21.70
   1   0 -12  370.06   26.80
  -1   0  11    1.20    4.20
   1   0 -11    1.10    6.30
  -1   0  10   12.20    4.80
   1   0 -10    9.80    6.10
   1   0  -9    3.50    5.20
  -1   0   9    2.30    4.00
  -1   0   9    3.20    3.10
  -1   0   8 1483.85   53.99
   1   0  -8 1345.27   57.39
  -1   0   8 1378.86   51.19
  -1   0   7   -0.20    2.80
   1   0  -7    1.90    3.70
  -1   0   7   -0.90    2.20
  -1   0   6   70.29    6.20
  -1   0   6   60.09    5.90
   1   0  -6   60.29    7.70
  -1   0   5    0.00    2.50
  -1   0   5   -2.00    2.00
   1   0  -5    2.50    3.00
   1   0  -4  260.37   13.30
  -1   0   4  259.77   12.20
  -1   0   4  272.97    9.20
  -1   0   4  275.27   11.40
  -1   0   3   -8.70    2.10
  -1   0   3   -9.30    1.80
  -1   0   3   -9.60    0.90
   1   0  -3   -6.90    2.40
  -1   0   2  547.85   18.90
   1   0  -2  549.74   20.90
  -1   0   2  523.85   17.70
  -1   0   2  518.05   20.40
   1   0  -1    0.50    1.00
   1   0  -1    0.80    0.70
  -1   0   1   -0.10    0.90
  -1   0   1    2.60    0.90
  -1   0   1   -0.60    1.10
  -1   0   1   -0.10    0.70
  -1   0   0   -2.60    0.60
  -1   0   0   -2.40    0.60
  -1   0  -1   -4.80    0.40
  -1   0  -1   -4.80    0.40
  -1   0  -1   -4.20    1.20
  -1   0  -1   -5.00    1.20
  -1   0  -2 5736.53  194.68
   1   0   2 5409.96  183.68
  -1   0  -2 5625.34  194.58
  -1   0  -2 5506.35  178.98
  -1   0  -2 5309.87  183.68
  -1   0  -3    1.70    1.90
   1   0   3    0.90    2.10
  -1   0  -3    1.50    1.80
   1   0   4   63.99    4.30
  -1   0  -4   57.29    5.10
  -1   0  -4   61.19    5.40
   1   0   4   61.39    4.80
  -1   0  -5    1.00    2.80
   1   0   5    1.10    2.70
  -1   0  -5    0.40    2.50
   1   0   6 1109.99   40.70
  -1   0  -6 1126.19   44.30
  -1   0  -6 1146.49   44.90
  -1   0  -7    2.80    3.50
   1   0   7    1.40    2.80
  -1   0  -7   -0.40    3.20
  -1   0  -8  501.45   25.10
   1   0   8  498.55   21.40
   1   0   9   -4.40    3.40
  -1   0  -9    0.60    4.90
  -1   0 -10 2549.04  102.19
   1   0  10 2640.64   92.39
  -1   0 -11    3.20    6.70
   1   0  11    5.20    5.40
  -1   0 -12  233.58   22.80
   1   0  12  251.37   15.90
  -1   0 -13   10.60    9.20
   1   0  13    3.90    6.30
   1   0  14  997.90   41.90
  -1   0 -14  927.01   51.99
  -1   0 -15    5.30   11.60
   1   0  15   -6.70    7.60
  -1   0 -16  209.08   28.10
   1   0  16  249.68   19.40
   1   0  17   -4.70    9.90
   1   0  18   64.19   14.60
  -1   1  18   86.59   15.30
  -1  -1  18   86.49   15.30
  -1   1  17   22.50   10.10
  -1  -1  17   33.60   11.30
  -1   1  16  328.57   22.30
  -1  -1  16  360.26   23.20
  -1   1  15   16.00    8.50
  -1  -1  15   23.90    9.10
  -1   1  14   42.50    9.40
   1   1 -14   21.30   12.80
   1  -1 -14   35.70   12.60
  -1  -1  14   58.69   10.30
  -1   1  13    1.90    6.40
   1   1 -13    9.40    9.20
   1  -1 -13   10.60    8.40
  -1  -1  13   11.30    6.50
   1   1 -12 1103.79   55.49
  -1   1  12 1161.68   46.10
   1  -1 -12 1145.09   53.99
  -1  -1  12 1160.78   45.80
  -1   1  11    5.50    5.50
   1   1 -11    3.40    7.10
  -1  -1  11    5.20    5.20
   1  -1 -11    9.70    6.60
  -1   1  10   54.09    7.70
   1   1 -10   40.40    9.40
  -1  -1  10   49.10    7.00
   1  -1 -10   53.99    9.50
  -1   1   9    4.70    4.50
   1   1  -9    1.70    5.50
  -1   1   9    4.30    3.70
  -1  -1   9   -1.50    3.80
   1  -1  -9   -2.60    4.30
  -1   1   8   95.59    9.00
   1   1  -8   98.79   11.70
  -1   1   8   99.19    8.80
   1  -1  -8   91.89   10.00
  -1  -1   8  101.39    7.30
  -1  -1   8  106.99    8.10
   1   1  -7    0.20    4.00
  -1   1   7    6.40    3.50
  -1   1   7    4.30    3.20
   1  -1  -7    1.90    3.50
  -1  -1   7    1.70    3.00
  -1  -1   7    2.00    2.10
  -1   1   6  232.68   11.80
  -1   1   6  220.18   12.80
   1   1  -6  224.68   15.00
  -1  -1   6  244.48   11.50
   1  -1  -6  226.88   13.20
  -1  -1   6  251.37   11.40
   1   1  -5    1.60    3.80
  -1   1   5    3.00    3.20
  -1   1   5    1.50    2.90
  -1  -1   5   -3.70    2.40
   1  -1  -5    2.50    2.80
  -1  -1   5   -1.70    1.50
  -1   1   4  465.55   19.10
   1   1  -4  510.55   22.80
  -1   1   4  491.75   21.60
  -1  -1   4  492.45   18.80
   1  -1  -4  497.25   20.50
  -1  -1   4  512.95   19.60
   1   1  -3    3.60    3.80
  -1   1   3    0.40    3.30
  -1   1   3    1.20    2.70
  -1  -1   3   -2.30    2.20
  -1  -1   3    2.40    1.80
   1  -1  -3    1.90    2.30
   1   1  -2 3130.49  112.89
  -1   1   2 3003.60  112.79
  -1   1   2 3080.19  104.69
   1  -1  -2 3139.89  110.59
  -1  -1   2 3241.38  110.29
  -1  -1   2 3058.69  104.39
  -1   1   1   10.70    1.90
   1   1  -1   12.60    3.30
  -1   1   1   10.20    1.40
  -1   1   1   13.30    1.60
  -1   1   1   16.20    4.20
  -1  -1   1   11.70    1.30
   1  -1  -1    9.80    1.30
  -1  -1   1    7.50    3.30
  -1  -1   1    9.90    1.90
   1   1   0 1089.49   41.50
  -1   1   0 1118.69   38.70
  -1   1   0 1080.99   37.00
  -1   1   0 1047.10   41.20
   1  -1   0 1075.99   37.00
  -1  -1   0 1042.00   38.60
   1  -1   0 1104.69   38.60
  -1  -1   0 1052.99   41.70
  -1  -1   0 1122.89   37.40
  -1   1  -1   -8.00    2.10
   1   1   1   -4.90    2.80
  -1   1  -1   -7.60    0.60
   1   1   1   -9.20    2.10
  -1   1  -1   -7.50    2.00
  -1  -1  -1   -3.80    1.20
  -1  -1  -1   -6.20    1.20
   1  -1   1   -7.10    0.60
   1  -1   1   -6.50    1.00
  -1  -1  -1   -8.10    3.40
  -1  -1  -1   -6.50    0.70
  -1   1  -2   12.80    3.20
   1   1   2   11.10    2.90
  -1   1  -2   12.90    1.60
   1   1   2   21.40    3.30
   1  -1   2   14.30    2.00
  -1  -1  -2   17.20    1.90
  -1  -1  -2   19.10    2.00
  -1  -1  -2   22.20    4.40
   1  -1   2   11.60    1.40
  -1   1  -3 1974.40   66.49
   1   1   3 1811.22   67.59
   1   1   3 1810.02   63.89
  -1   1  -3 1895.51   68.69
   1  -1   3 1868.91   62.89
   1  -1   3 1878.31   66.09
  -1  -1  -3 1806.02   66.69
  -1  -1  -3 1784.62   68.79
  -1  -1  -3 1844.52   60.89
  -1   1  -4  265.57   14.00
   1   1   4  272.27   12.50
   1   1   4  260.77   12.20
  -1   1  -4  284.07   11.70
   1  -1   4  264.37   11.00
   1  -1   4  267.37   11.20
  -1  -1  -4  277.17   14.50
  -1  -1  -4  274.27   12.10
  -1  -1  -4  258.47   10.40
   1   1   5  631.24   25.10
   1   1   5  636.84   24.30
  -1   1  -5  631.94   24.70
  -1   1  -5  588.24   27.00
   1  -1   5  601.74   23.20
  -1  -1  -5  612.84   21.80
  -1  -1  -5  637.24   25.40
  -1  -1  -5  632.74   27.50
  -1   1  -6 5398.86  183.78
   1   1   6 5163.18  183.38
  -1   1  -6 5072.29  186.38
   1   1   6 5002.80  173.68
  -1  -1  -6 5128.29  186.28
   1  -1   6 5070.49  172.88
  -1  -1  -6 5046.00  184.28
  -1   1  -7    9.40    3.60
   1   1   7    5.50    3.90
  -1   1  -7   10.10    4.90
  -1  -1  -7    9.60    4.00
   1  -1   7    8.50    3.20
  -1   1  -8   17.80    6.20
   1   1   8   19.30    5.10
  -1  -1  -8   21.80    5.80
   1  -1   8   13.90    4.20
  -1   1  -9  111.19   13.50
   1   1   9  131.29   10.40
  -1  -1  -9  121.29   12.70
   1  -1   9  126.69    9.50
   1   1  10 1114.29   42.30
  -1   1 -10 1034.30   49.10
  -1  -1 -10 1072.59   47.60
   1  -1  10 1037.70   41.20
   1   1  11  370.96   20.40
  -1   1 -11  394.16   26.40
   1  -1  11  410.56   19.80
  -1  -1 -11  406.86   25.10
  -1   1 -12  471.05   31.10
   1   1  12  459.35   23.60
   1  -1  12  487.15   23.50
  -1  -1 -12  467.05   29.30
   1   1  13  361.56   20.50
  -1   1 -13  321.27   27.30
  -1  -1 -13  335.07   26.10
   1  -1  13  354.46   19.90
   1   1  14  401.46   23.10
  -1   1 -14  364.96   30.50
   1  -1  14  399.86   22.40
  -1  -1 -14  361.66   29.20
  -1   1 -15   -7.40   11.20
   1   1  15    6.60    8.80
   1  -1  15    3.90    8.20
  -1  -1 -15    5.70   11.90
  -1   1 -16  273.97   32.20
   1   1  16  266.27   20.40
  -1  -1 -16  225.68   28.30
   1  -1  16  268.87   20.20
   1   1  17   53.59   13.50
   1  -1  17   42.80   12.40
   1   1  18  296.37   24.00
   1  -1  18  314.77   24.10
  -1   2  18   36.80   13.40
  -1  -2  18   23.20   11.70
  -1   2  17   24.30   11.70
  -1  -2  17   39.90   11.70
  -1   2  16  384.26   24.50
  -1  -2  16  357.36   23.30
  -1   2  15   23.30    9.10
  -1  -2  15   32.30    9.40
  -1   2  14  188.28   17.00
   1   2 -14  153.08   23.50
  -1  -2  14  217.88   16.40
   1   2 -13  224.18   25.60
  -1   2  13  257.77   17.60
  -1  -2  13  241.88   16.60
   1  -2 -13  212.68   21.70
  -1   2  12  226.48   15.10
   1   2 -12  193.38   22.60
  -1  -2  12  194.88   14.30
   1  -2 -12  164.98   18.20
   1   2 -11  186.18   20.90
  -1   2  11  173.68   12.90
  -1  -2  11  141.09   12.60
   1  -2 -11  151.48   16.00
  -1   2  10  275.87   16.40
   1   2 -10  288.27   22.60
  -1  -2  10  320.07   16.60
   1  -2 -10  304.07   19.70
  -1   2   9    3.80    4.80
   1   2  -9    6.10    6.50
   1  -2  -9    3.50    4.40
  -1  -2   9    4.60    4.00
   1   2  -8 2067.89   85.59
  -1   2   8 2076.19   81.09
  -1   2   8 2161.18   76.09
  -1  -2   8 2149.08   75.19
   1  -2  -8 2039.30   81.09
  -1  -2   8 2189.98   78.09
  -1   2   7   38.10    5.90
   1   2  -7   33.10    7.80
  -1   2   7   28.00    6.00
  -1  -2   7   51.49    5.00
  -1  -2   7   47.20    5.80
   1  -2  -7   30.10    5.60
  -1   2   6  856.61   32.90
  -1   2   6  867.11   36.50
   1   2  -6  817.12   38.40
  -1  -2   6  837.52   32.70
  -1  -2   6  871.51   32.20
   1  -2  -6  850.51   34.60
  -1   2   5   13.70    4.20
   1   2  -5   23.80    6.00
  -1   2   5   24.10    5.70
  -1  -2   5   16.70    2.60
   1  -2  -5   17.70    3.50
  -1  -2   5   22.70    3.90
  -1   2   4  491.15   20.20
  -1   2   4  478.15   23.80
   1   2  -4  497.35   24.60
   1  -2  -4  499.15   20.30
  -1  -2   4  493.65   19.30
  -1  -2   4  486.55   19.40
  -1   2   3  135.89   12.20
   1   2  -3  144.69   11.60
  -1   2   3  132.99    8.50
   1  -2  -3  144.69    7.40
  -1  -2   3  129.19    6.60
  -1  -2   3  135.79    7.60
  -1   2   2  516.85   20.40
  -1   2   2  470.35   25.60
  -1   2   2  525.35   18.90
   1   2  -2  526.05   24.70
   1  -2  -2  489.15   19.80
  -1  -2   2  512.65   19.70
  -1  -2   2  530.45   19.60
  -1   2   1  910.01   29.70
   1   2  -1  785.82   35.00
  -1   2   1  794.42   29.90
  -1   2   1  760.92   36.00
   1  -2  -1  787.62   29.90
  -1  -2   1  763.12   29.80
  -1  -2   1  841.82   29.60
   1   2   0  503.45   23.90
  -1   2   0  439.16   23.40
  -1   2   0  481.95   17.90
  -1   2   0  472.25   18.90
  -1  -2   0  481.95   18.80
  -1  -2   0  440.96   17.70
   1  -2   0  457.75   18.50
   1  -2   0  479.65   17.80
  -1   2  -1  262.67   10.80
  -1   2  -1  263.47   15.80
   1   2   1  302.87   17.60
  -1   2  -1  279.47   12.90
   1   2   1  269.57   13.50
  -1  -2  -1  291.57   10.80
   1  -2   1  274.27   11.50
  -1  -2  -1  271.37   11.00
  -1  -2  -1  266.07   18.20
   1  -2   1  277.17   10.90
   1  -2   1  250.17   10.60
   1   2   2 7839.12  264.77
  -1   2  -2 8130.69  264.77
  -1   2  -2 7744.73  282.37
  -1   2  -2 7984.40  278.07
   1   2   2 8055.29  282.77
  -1  -2  -2 7981.30  278.27
  -1  -2  -2 7703.93  279.97
   1  -2   2 8071.79  263.27
  -1  -2  -2 7610.74  283.97
   1  -2   2 7731.83  277.87
   1   2   3  306.97   14.60
   1   2   3  317.97   16.80
  -1   2  -3  321.77   13.00
  -1   2  -3  327.37   17.40
  -1  -2  -3  313.47   12.00
   1  -2   3  314.67   12.90
  -1  -2  -3  326.17   13.30
   1  -2   3  304.67   12.60
  -1  -2  -3  327.97   19.50
   1   2   4 1873.01   65.19
  -1   2  -4 1932.31   66.79
  -1   2  -4 1793.22   71.09
   1   2   4 1840.62   69.59
  -1  -2  -4 1755.32   71.89
   1  -2   4 1841.22   66.19
  -1  -2  -4 1853.61   60.79
   1  -2   4 1843.82   63.49
  -1  -2  -4 1800.32   67.09
  -1   2  -5   49.10    8.10
  -1   2  -5   35.80    3.90
   1   2   5   49.20    6.20
   1   2   5   40.90    6.00
  -1  -2  -5   54.39    3.90
   1  -2   5   37.40    4.50
   1  -2   5   42.80    3.70
  -1  -2  -5   44.80    4.90
   1   2   6  151.58   10.90
  -1   2  -6  162.08    9.40
   1   2   6  181.38   10.80
  -1   2  -6  173.88   13.80
   1  -2   6  176.28    9.50
  -1  -2  -6  191.38    8.00
  -1  -2  -6  158.48   10.20
  -1   2  -7 1052.69   46.40
   1   2   7 1034.00   42.00
   1   2   7 1028.70   40.30
  -1  -2  -7 1037.90   42.20
   1  -2   7 1063.39   38.90
  -1  -2  -7 1072.29   36.00
  -1   2  -8  164.48   16.10
   1   2   8  139.99   11.10
   1  -2   8  170.58   10.00
  -1  -2  -8  161.38   11.90
  -1   2  -9  483.65   28.70
   1   2   9  544.85   23.60
  -1  -2  -9  494.05   25.20
   1  -2   9  460.95   21.60
   1   2  10 1256.27   48.30
  -1   2 -10 1192.78   56.49
  -1  -2 -10 1212.08   52.79
   1  -2  10 1241.08   46.80
   1   2  11    4.60    6.40
  -1   2 -11   23.00    9.40
   1  -2  11   10.40    5.60
  -1  -2 -11   10.70    7.20
  -1   2 -12  144.99   19.40
   1   2  12  135.99   13.70
  -1  -2 -12  134.69   16.10
   1  -2  12  131.09   12.30
   1   2  13  100.79   12.90
  -1   2 -13   79.79   16.90
  -1  -2 -13  105.49   15.60
   1  -2  13   88.79   11.30
  -1   2 -14  452.85   35.50
   1   2  14  485.85   25.90
  -1  -2 -14  478.85   33.00
   1  -2  14  432.66   24.30
  -1   2 -15  170.58   26.10
   1   2  15  213.88   19.10
   1  -2  15  183.08   17.20
  -1  -2 -15  163.28   22.90
  -1   2 -16   51.89   18.90
   1   2  16   38.00   11.90
   1  -2  16   46.80   11.30
   1   2  17   59.49   13.60
   1  -2  17   46.80   12.90
   1   2  18   15.70   12.90
   1  -2  18    1.80   11.20
  -1   3  18   22.80   12.90
  -1  -3  18   24.00   12.30
  -1   3  17  150.18   18.50
  -1  -3  17  164.58   18.50
  -1   3  16   71.59   13.30
  -1  -3  16   69.39   12.80
  -1   3  15  114.39   14.90
  -1  -3  15  102.39   13.50
  -1   3  14   95.79   13.40
  -1  -3  14  116.59   13.40
  -1   3  13   44.30    9.90
   1   3 -13   20.90   12.50
  -1  -3  13   23.80    7.60
   1  -3 -13   19.90    9.40
   1   3 -12 1024.40   58.49
  -1   3  12 1176.88   48.30
  -1  -3  12 1269.27   48.00
   1  -3 -12 1180.08   54.29
   1   3 -11  101.19   16.50
  -1   3  11  136.09   12.90
  -1  -3  11  112.39   11.40
   1  -3 -11  145.79   15.60
   1   3 -10    9.70    8.40
  -1   3  10    9.60    6.00
  -1  -3  10    1.00    4.90
   1  -3 -10    3.40    5.10
   1   3  -9  236.98   22.40
  -1   3   9  222.48   15.00
   1  -3  -9  226.08   15.50
  -1  -3   9  229.58   13.60
  -1   3   8    4.00    5.00
  -1   3   8   20.70    6.50
   1   3  -8   12.80    7.50
  -1  -3   8   18.20    5.10
   1  -3  -8   17.50    5.20
  -1  -3   8   19.60    3.70
   1   3  -7   -1.60    5.60
  -1   3   7   14.90    5.80
  -1   3   7   23.20    5.90
   1  -3  -7    6.50    3.80
  -1  -3   7   13.30    2.90
  -1  -3   7   15.50    4.60
   1  -3  -7   10.40    2.00
  -1   3   6 1225.18   51.89
   1   3  -6 1164.18   53.49
  -1   3   6 1227.18   46.00
   1  -3  -6 1247.48   47.60
  -1  -3   6 1188.58   44.90
  -1  -3   6 1231.58   45.70
  -1   3   5  122.19    9.20
   1   3  -5  129.49   13.70
  -1   3   5  130.09   13.30
   1  -3  -5  116.19    8.20
  -1  -3   5  134.09    8.40
  -1  -3   5  121.69    7.00
   1   3  -4 3751.82  142.19
  -1   3   4 3813.02  129.59
  -1   3   4 3549.64  141.49
  -1  -3   4 3930.91  134.49
   1  -3  -4 3639.64  135.19
  -1  -3   4 3873.31  128.69
  -1   3   3   33.90    5.70
   1   3  -3   57.89   10.00
  -1   3   3   39.90    9.20
  -1  -3   3   43.90    3.80
   1  -3  -3   40.70    4.20
  -1  -3   3   43.80    5.30
   1   3  -2 1557.64   62.59
  -1   3   2 1500.55   63.69
  -1   3   2 1500.25   54.39
  -1  -3   2 1489.35   53.59
  -1  -3   2 1433.36   54.79
   1  -3  -2 1590.24   55.29
  -1   3   1  128.09   14.10
  -1   3   1  143.79    9.50
   1   3  -1  131.89   14.20
  -1  -3   1  117.69    6.30
   1  -3  -1  124.79    6.50
  -1  -3   1  137.19    8.40
  -1   3   0 1646.14   58.49
   1   3   0 1714.13   59.79
  -1   3   0 1563.44   66.89
   1   3   0 1627.44   67.09
  -1  -3   0 1562.04   57.99
   1  -3   0 1613.64   57.99
   1  -3   0 1621.84   58.99
  -1  -3   0 1677.53   59.19
   1   3   1  125.39   13.90
   1   3   1  100.39    9.10
  -1   3  -1   95.99   11.80
  -1   3  -1  115.59    9.00
  -1  -3  -1   83.69    4.60
   1  -3   1  101.59    5.40
  -1  -3  -1  104.29    5.70
   1  -3   1  107.09    7.30
  -1   3  -2  663.33   31.10
   1   3   2  555.24   25.50
  -1   3  -2  658.73   26.00
   1   3   2  591.34   31.00
   1  -3   2  660.73   24.10
  -1  -3  -2  595.24   24.00
   1  -3   2  629.54   23.50
   1   3   3  645.74   26.30
  -1   3  -3  625.74   26.40
   1   3   3  617.14   30.60
  -1   3  -3  599.34   30.50
  -1  -3  -3  629.34   24.60
   1  -3   3  651.93   24.30
   1  -3   3  617.74   23.80
   1   3   4  357.96   16.90
  -1   3  -4  302.47   19.70
   1   3   4  320.57   19.10
  -1  -3  -4  294.57   14.10
  -1  -3  -4  314.87   12.70
   1  -3   4  329.97   13.40
   1  -3   4  337.07   14.50
   1   3   5  571.14   26.20
  -1   3  -5  504.85   27.60
   1   3   5  551.34   23.50
   1  -3   5  506.55   20.60
   1  -3   5  487.65   21.00
  -1  -3  -5  523.05   22.00
  -1  -3  -5  529.05   19.10
   1   3   6 1438.16   54.99
   1   3   6 1519.15   59.39
  -1   3  -6 1386.96   62.09
  -1  -3  -6 1465.05   56.39
   1  -3   6 1544.25   54.49
  -1  -3  -6 1462.75   49.80
   1  -3   6 1505.75   53.39
   1   3   7  273.97   15.30
   1   3   7  257.07   16.10
  -1   3  -7  226.68   18.90
   1  -3   7  245.48   13.30
  -1  -3  -7  277.87   14.70
  -1  -3  -7  268.67   11.20
   1   3   8   30.10    7.10
  -1   3  -8   43.20   10.10
  -1  -3  -8   22.00    5.40
  -1  -3  -8   35.90    4.50
   1  -3   8   42.90    6.10
  -1   3  -9    4.10    7.10
   1   3   9   26.90    6.70
   1  -3   9    3.40    4.20
  -1  -3  -9    7.40    5.10
  -1   3 -10   25.40   10.40
   1   3  10   43.80    8.30
   1  -3  10   26.40    6.50
  -1  -3 -10   30.80    7.50
   1   3  11  451.55   23.90
  -1   3 -11  398.06   30.30
  -1  -3 -11  442.26   26.20
   1  -3  11  460.85   22.50
  -1   3 -12   78.89   16.70
   1   3  12   50.79    9.90
  -1  -3 -12   41.00   10.50
   1  -3  12   47.40    8.60
   1   3  13  110.49   13.60
  -1   3 -13   90.59   18.60
   1  -3  13  111.29   12.60
  -1  -3 -13   81.59   14.50
   1   3  14  194.28   18.30
  -1   3 -14  175.08   25.10
  -1  -3 -14  181.08   21.40
   1  -3  14  185.58   16.90
  -1   3 -15    3.70   14.30
   1   3  15   24.00   10.50
   1  -3  15    6.20    8.20
  -1  -3 -15    4.20   11.20
   1   3  16  143.29   17.80
   1  -3  16  156.98   17.00
   1   3  17   78.99   15.00
   1  -3  17   46.40   12.60
   1   3  18   81.09   16.60
   1  -3  18   70.69   15.00
  -1   4  17    4.60   11.30
  -1  -4  17  -10.10    9.90
  -1   4  16  278.97   22.50
  -1  -4  16  285.87   22.10
  -1   4  15  187.38   18.80
  -1  -4  15  172.18   17.50
  -1   4  14   11.80    9.40
  -1  -4  14    2.90    8.10
   1   4 -13   71.69   18.40
  -1   4  13  132.09   14.40
  -1  -4  13  120.39   13.90
  -1   4  12    8.30    7.30
   1   4 -12   -6.90    9.50
  -1  -4  12   -0.70    6.40
   1  -4 -12  -14.90    5.90
  -1   4  11   95.79   12.00
   1   4 -11  105.79   18.10
  -1  -4  11  116.09   11.90
   1  -4 -11  102.89   13.00
   1   4 -10  606.14   38.50
  -1   4  10  609.64   29.10
  -1  -4  10  629.14   28.30
   1  -4 -10  591.84   30.50
   1   4  -9  222.58   23.10
  -1   4   9  216.78   15.00
  -1  -4   9  224.08   14.50
   1  -4  -9  218.18   15.30
  -1   4   8 2527.15   90.99
   1   4  -8 2543.45  104.69
   1  -4  -8 2425.36   95.09
  -1  -4   8 2569.14   89.99
  -1   4   7  224.38   18.60
  -1   4   7  266.37   15.50
   1   4  -7  219.28   22.20
   1  -4  -7  250.17   10.40
  -1  -4   7  246.68   14.50
  -1  -4   7  270.27   12.60
   1  -4  -7  239.08   14.40
   1   4  -6  145.39   17.50
  -1   4   6  121.79   11.30
  -1   4   6  108.49   14.30
   1  -4  -6  132.09    9.40
  -1  -4   6  123.19    9.90
  -1  -4   6  132.19    7.90
  -1   4   5    1.50    4.60
   1   4  -5    2.80    6.30
  -1   4   5    0.60    6.40
   1  -4  -5    2.50    2.80
  -1  -4   5    6.90    2.30
  -1  -4   5    8.50    4.00
  -1   4   4  353.26   18.70
  -1   4   4  359.56   25.30
   1   4  -4  377.26   25.00
  -1  -4   4  426.36   16.70
  -1  -4   4  410.86   18.20
   1  -4  -4  360.26   17.00
  -1   4   3 1254.47   48.10
   1   4  -3 1255.47   56.99
  -1   4   3 1233.08   57.89
  -1  -4   3 1274.27   47.40
   1  -4  -3 1305.37   48.00
  -1  -4   3 1305.37   47.40
  -1   4   2 1944.61   72.99
  -1   4   2 1958.40   84.89
   1   4  -2 1943.71   83.49
  -1  -4   2 2141.59   73.99
  -1  -4   2 2044.10   72.49
   1  -4  -2 2100.99   74.19
  -1   4   1  199.38   12.50
  -1   4   1  212.68   20.50
   1   4  -1  177.08   14.10
   1   4  -1  182.88   18.50
  -1  -4   1  206.48   12.00
  -1  -4   1  185.38    9.20
   1  -4  -1  201.48    9.50
   1   4   0 1876.91   82.49
  -1   4   0 2052.49   72.39
  -1   4   0 1956.10   83.29
   1   4   0 1991.30   73.39
   1  -4   0 1977.10   71.89
   1  -4   0 1999.20   72.59
  -1  -4   0 2073.09   72.89
  -1  -4   0 2034.90   71.89
  -1   4  -1  579.74   25.30
  -1   4  -1  517.95   31.50
   1   4   1  535.35   32.00
   1   4   1  585.84   25.90
   1  -4   1  561.04   22.40
  -1  -4  -1  606.34   22.80
   1  -4   1  527.35   23.70
  -1  -4  -1  583.84   21.30
  -1   4  -2  933.51   44.40
   1   4   2  915.21   44.70
   1   4   2  924.21   37.20
  -1   4  -2  876.71   36.50
   1  -4   2  822.62   34.10
   1  -4   2  949.11   35.30
   1  -4   2  977.20   34.70
  -1  -4  -2  933.81   35.00
  -1   4  -3  414.16   25.40
   1   4   3  388.66   19.90
  -1   4  -3  392.16   20.00
   1   4   3  381.96   25.20
  -1  -4  -3  397.86   17.10
   1  -4   3  410.96   18.10
   1  -4   3  406.66   16.40
  -1   4  -4  368.46   23.80
   1   4   4  341.47   18.30
   1   4   4  387.86   23.30
  -1   4  -4  360.26   18.90
   1  -4   4  369.26   16.70
   1  -4   4  337.37   14.70
  -1  -4  -4  329.87   15.60
   1   4   5   16.30    5.90
  -1   4  -5   21.50    8.10
   1   4   5   36.10    8.80
  -1  -4  -5   16.80    3.70
   1  -4   5   29.90    3.40
   1  -4   5   19.40    4.60
  -1  -4  -5   13.50    3.40
  -1   4  -6  226.78   21.70
   1   4   6  258.57   16.10
   1   4   6  229.68   17.80
   1  -4   6  280.57   14.20
  -1  -4  -6  251.67   13.60
  -1  -4  -6  247.48   11.00
   1   4   7  425.76   21.80
  -1   4  -7  388.26   27.00
   1  -4   7  407.46   19.60
  -1  -4  -7  411.86   20.40
  -1  -4  -7  439.86   16.60
   1   4   8  129.89   12.60
  -1   4  -8  105.49   16.00
  -1  -4  -8  124.79   10.60
   1  -4   8  133.69   11.20
  -1  -4  -8  121.89    7.50
   1   4   9  542.25   26.20
  -1   4  -9  479.45   33.00
  -1  -4  -9  528.45   26.40
   1  -4   9  521.55   24.30
   1   4  10  465.05   24.60
  -1   4 -10  464.25   33.00
  -1  -4 -10  466.85   25.80
   1  -4  10  494.85   23.50
   1   4  11   68.69   11.20
  -1   4 -11   64.09   15.50
  -1  -4 -11   79.19   11.70
   1  -4  11   61.39    9.50
  -1   4 -12   27.60   13.10
   1   4  12   38.50   10.30
  -1  -4 -12   32.90   10.10
   1  -4  12   65.59   10.30
   1   4  13  110.99   14.40
  -1   4 -13   36.80   15.80
  -1  -4 -13   77.49   14.20
   1  -4  13  114.39   13.10
  -1   4 -14   14.00   14.60
   1   4  14   28.70   11.10
   1  -4  14   40.30    9.80
  -1  -4 -14   12.20   10.10
   1   4  15  331.37   23.40
   1  -4  15  341.87   22.80
   1   4  16    9.80   10.80
   1  -4  16    5.10   10.00
   1   4  17    1.60   12.20
   1  -4  17   -1.20   10.50
  -1   5  17   64.79   15.40
  -1  -5  17   95.49   16.30
  -1   5  16   12.40   11.80
  -1  -5  16   12.90   10.90
  -1   5  15    2.90    9.90
  -1  -5  15   16.50    9.80
  -1   5  14   60.19   12.70
  -1  -5  14   38.90   11.10
  -1   5  13  257.17   19.80
  -1  -5  13  247.08   19.10
   1   5 -12  821.82   52.69
  -1   5  12  886.91   40.20
  -1  -5  12  873.71   39.30
   1   5 -11  541.95   39.90
  -1   5  11  569.04   28.90
  -1  -5  11  576.24   28.70
  -1   5  10    9.60    7.40
   1   5 -10   10.00   11.20
  -1  -5  10    6.90    6.40
   1  -5 -10    2.40    5.50
  -1   5   9   -2.10    5.90
   1   5  -9    9.40    9.50
  -1  -5   9    0.30    4.90
   1  -5  -9   -2.80    4.80
  -1   5   8   53.69    9.50
   1   5  -8   50.79   13.40
  -1  -5   8   74.19    9.40
   1  -5  -8   68.79    8.90
   1   5  -7 1770.42   78.99
  -1   5   7 1671.13   65.59
  -1  -5   7 1776.32   65.19
   1  -5  -7 1723.23   67.19
  -1   5   6  997.40   40.90
   1   5  -6  972.10   50.99
  -1   5   6 1000.20   49.70
  -1  -5   6  959.90   39.90
   1  -5  -6 1002.40   40.50
  -1  -5   6 1019.90   38.80
  -1   5   5  986.90   42.00
  -1   5   5  969.90   51.09
   1   5  -5 1007.10   51.89
  -1  -5   5 1086.09   41.50
  -1  -5   5 1101.49   40.20
   1  -5  -5 1034.10   41.30
  -1   5   4  858.71   37.10
   1   5  -4  817.42   45.60
  -1   5   4  899.21   47.20
  -1  -5   4  934.11   36.40
  -1  -5   4  910.81   34.70
   1  -5  -4  905.21   35.60
   1   5  -3   60.79   13.10
  -1   5   3   66.99   14.60
   1   5  -3   87.09   11.50
  -1   5   3   88.69    9.80
   1  -5  -3   79.89    6.70
  -1  -5   3   82.19    6.10
  -1  -5   3   85.99    9.30
   1   5  -2 1079.19   54.19
  -1   5   2 1044.90   54.89
  -1   5   2 1063.19   44.00
   1   5  -2 1074.19   45.80
  -1  -5   2 1196.58   42.40
   1  -5  -2 1130.49   42.60
  -1  -5   2 1131.49   43.50
  -1   5   1  303.97   25.10
   1   5  -1  273.47   17.90
   1   5  -1  295.47   24.20
  -1   5   1  276.37   16.90
  -1  -5   1  295.37   13.70
  -1  -5   1  297.67   13.40
  -1  -5   1  298.77   16.50
   1  -5  -1  317.87   13.80
   1   5   0  813.82   43.00
  -1   5   0  736.43   32.80
   1   5   0  755.62   33.90
  -1   5   0  749.62   42.50
  -1  -5   0  794.82   32.90
  -1  -5   0  769.62   30.50
   1  -5   0  790.22   30.40
   1  -5   0  787.82   32.80
  -1   5  -1 2121.29   77.79
   1   5   1 2059.79   90.29
  -1   5  -1 2103.89   90.79
   1   5   1 2119.99   78.89
   1  -5   1 2173.58   77.59
   1  -5   1 2099.09   77.09
  -1  -5  -1 2093.09   76.29
  -1  -5  -1 2175.58   77.89
  -1   5  -2  709.63   39.70
   1   5   2  688.33   31.30
   1   5   2  645.24   38.80
  -1   5  -2  678.23   30.60
  -1  -5  -2  705.93   28.20
   1  -5   2  693.63   29.70
   1  -5   2  744.83   27.90
  -1   5  -3   23.20    9.80
   1   5   3   22.00    9.70
  -1   5  -3   18.70    6.30
   1   5   3   16.20    6.70
   1  -5   3   18.20    3.00
   1  -5   3   22.00    5.50
  -1  -5  -3   18.30    3.60
   1  -5   3   22.50    3.40
  -1   5  -4  583.94   27.80
   1   5   4  610.74   34.40
  -1   5  -4  519.55   33.70
   1   5   4  579.64   27.50
   1  -5   4  581.94   23.30
  -1  -5  -4  585.94   24.50
   1  -5   4  574.74   25.50
   1   5   5  695.83   30.70
  -1   5  -5  607.24   30.10
   1   5   5  641.54   35.90
  -1   5  -5  581.74   36.60
   1  -5   5  641.54   28.00
  -1  -5  -5  672.53   24.80
  -1  -5  -5  684.83   27.80
  -1   5  -6 1341.17   53.39
   1   5   6 1304.57   52.69
  -1   5  -6 1203.88   61.49
  -1  -5  -6 1353.96   46.20
   1  -5   6 1340.47   50.59
  -1  -5  -6 1324.87   51.79
   1   5   7  270.07   17.70
  -1   5  -7  291.47   24.60
  -1   5  -7  286.87   19.20
   1  -5   7  290.07   16.30
  -1  -5  -7  260.27   12.50
  -1  -5  -7  273.67   15.70
   1   5   8   36.70    8.60
  -1   5  -8   29.70    9.00
  -1   5  -8   31.60   11.80
  -1  -5  -8   21.90    4.40
   1  -5   8   23.60    6.70
  -1  -5  -8   27.70    6.50
   1   5   9    0.20    7.10
  -1   5  -9    1.60   10.10
  -1  -5  -9   11.50    5.90
   1  -5   9   10.80    6.40
  -1   5 -10   20.30   11.50
   1   5  10   19.30    8.60
   1  -5  10   25.30    7.40
  -1  -5 -10   14.30    6.80
  -1   5 -11  333.07   34.10
   1   5  11  334.67   21.10
  -1  -5 -11  300.77   21.60
   1  -5  11  321.67   19.90
  -1   5 -12   53.19   16.40
   1   5  12   92.59   13.30
   1  -5  12   55.99   10.70
  -1  -5 -12   82.39   13.50
  -1   5 -13   99.69   22.50
   1   5  13  122.49   15.90
  -1   5 -13  150.68   17.60
   1  -5  13  110.29   13.90
  -1  -5 -13   90.09   15.40
   1   5  14   37.10   12.00
  -1   5 -14   57.49   20.00
   1  -5  14   38.00   10.40
   1   5  15   11.20   10.50
   1  -5  15   -5.10    8.70
   1   5  16   54.29   14.80
   1  -5  16   71.89   14.10
   1   5  17   38.00   15.30
   1  -5  17   54.59   14.30
  -1   6  16  147.29   19.40
  -1  -6  16  170.58   19.90
  -1   6  15  203.58   21.20
  -1  -6  15  214.68   21.40
  -1   6  14   10.40   11.00
  -1  -6  14   -0.70    8.90
  -1   6  13  143.49   17.10
  -1  -6  13  138.19   15.80
  -1   6  12   -8.70    8.20
  -1  -6  12    1.40    7.80
  -1   6  11  190.78   17.90
  -1  -6  11  210.78   16.80
  -1   6  10   27.50   10.00
   1   6 -10   49.00   16.20
  -1  -6  10   35.50    9.20
  -1   6   9  798.42   36.20
   1   6  -9  751.32   48.10
  -1  -6   9  760.12   35.50
  -1   6   8  400.16   22.30
   1   6  -8  315.87   32.40
   1  -6  -8  355.16   20.50
  -1  -6   8  394.76   21.80
  -1   6   7  333.17   20.00
   1   6  -7  317.77   32.50
  -1  -6   7  339.67   19.20
   1  -6  -7  312.67   17.90
  -1   6   6  161.98   14.80
   1   6  -6  123.09   20.00
  -1  -6   6  148.19   13.80
   1  -6  -6  143.59   10.90
   1   6  -5  139.59   20.90
   1   6  -5  106.19   14.10
  -1   6   5  118.09   13.10
  -1   6   5  140.49   20.00
  -1  -6   5  125.29   12.20
   1  -6  -5  123.69    9.60
   1   6  -4   71.59   12.20
  -1   6   4  111.19   12.10
   1   6  -4  104.79   17.90
  -1   6   4   56.29   14.70
   1  -6  -4   93.99    8.50
  -1  -6   4   96.39    7.00
  -1  -6   4   74.29   10.10
   1   6  -3 2520.65  104.99
  -1   6   3 2375.16  104.39
   1   6  -3 2430.66   90.89
  -1   6   3 2267.17   88.09
   1  -6  -3 2512.35   89.09
  -1  -6   3 2480.45   88.19
  -1  -6   3 2475.65   88.79
  -1  -6   3 2229.38   87.99
  -1   6   2  309.07   18.10
   1   6  -2  252.07   27.20
   1   6  -2  244.28   18.90
  -1   6   2  312.87   30.70
  -1  -6   2  243.88   16.90
  -1  -6   2  278.17   13.50
  -1  -6   2  290.77   14.00
   1  -6  -2  294.87   14.10
  -1   6   1  718.33   32.70
  -1   6   1  688.93   43.50
   1   6  -1  706.83   43.20
   1   6  -1  737.23   34.30
  -1  -6   1  725.13   32.40
   1  -6  -1  719.73   29.30
  -1  -6   1  741.13   29.50
  -1   6   0  133.69   13.30
   1   6   0  127.69   13.80
  -1   6   0  141.49   21.00
   1   6   0   98.79   17.80
  -1  -6   0  129.19   12.70
  -1  -6   0  141.29    8.60
   1  -6   0  118.09   12.80
   1  -6   0  129.89    8.50
   1   6   1   -1.90    6.10
   1   6   1    4.10    9.30
  -1   6  -1   10.10    6.40
  -1   6  -1   -0.50    8.90
   1  -6   1    4.70    5.70
  -1  -6  -1    4.70    2.00
  -1  -6  -1    3.60    2.60
   1  -6   1    2.20    2.30
  -1   6  -2 1114.19   58.49
  -1   6  -2 1129.19   46.60
   1   6   2 1158.18   47.60
   1   6   2 1076.89   57.49
  -1  -6  -2 1149.98   44.10
   1  -6   2 1138.09   43.50
   1  -6   2 1115.19   45.70
   1   6   3  962.10   41.60
  -1   6  -3  914.11   40.70
  -1   6  -3 1019.30   53.19
   1   6   3  966.00   51.59
  -1  -6  -3  965.60   38.30
   1  -6   3  961.00   39.70
  -1   6  -4  118.99   18.40
   1   6   4  109.49   13.10
  -1   6  -4  107.09   12.70
   1  -6   4  116.19   11.60
  -1  -6  -4  118.99    9.00
  -1   6  -5 1184.88   61.19
   1   6   5 1149.08   49.70
  -1   6  -5 1210.98   50.19
  -1  -6  -5 1211.58   47.70
   1  -6   5 1249.18   48.30
  -1   6  -6    3.60    7.40
  -1   6  -6   -1.90    9.30
   1   6   6   -0.30    6.70
   1  -6   6    3.00    5.40
  -1  -6  -6    1.90    3.50
  -1  -6  -6    6.20    3.80
  -1   6  -7    7.00   10.40
   1   6   7   14.70    7.80
  -1   6  -7    4.20    7.80
   1  -6   7   10.70    5.60
  -1  -6  -7   -0.10    3.90
  -1  -6  -7   -0.50    3.70
  -1   6  -8  101.99   14.20
   1   6   8  114.29   14.10
  -1   6  -8  131.19   21.30
   1  -6   8   97.49   11.80
  -1  -6  -8  134.09   12.40
   1   6   9   87.49   13.40
  -1   6  -9   84.19   13.70
  -1   6  -9   71.69   17.10
  -1  -6  -9   90.29   11.20
   1  -6   9   90.29   11.70
  -1   6 -10  347.67   36.50
  -1   6 -10  330.87   23.50
   1   6  10  329.07   21.90
  -1  -6 -10  300.87   20.90
   1  -6  10  314.77   20.30
  -1   6 -11   36.20   16.10
  -1   6 -11   13.80   11.00
   1   6  11   23.30   10.40
  -1  -6 -11   21.10    8.80
   1  -6  11   22.20    8.70
  -1   6 -12  -11.60   14.00
   1   6  12   18.80   10.60
  -1   6 -12   35.80   12.90
   1  -6  12   29.60    9.30
  -1   6 -13   -1.50   15.90
   1   6  13   17.30   11.20
   1  -6  13    5.20    8.60
   1   6  14   57.69   14.40
   1  -6  14   91.59   14.60
   1   6  15   57.79   15.20
   1  -6  15   53.89   13.10
   1   6  16   -1.50   12.60
   1  -6  16   14.50   11.30
  -1   7  15   22.00   12.80
  -1  -7  15   22.30   12.50
  -1   7  14   -0.60   10.50
   1   7 -14   22.20   16.20
  -1  -7  14    7.80   10.60
  -1   7  13  205.98   21.10
   1   7 -13  243.48   26.20
  -1  -7  13  230.68   22.00
  -1   7  12   64.39   13.30
   1   7 -12   94.69   19.20
  -1  -7  12   64.39   13.10
  -1   7  11  290.97   21.70
   1   7 -11  330.77   29.30
  -1  -7  11  336.17   22.30
  -1   7  10   54.49   11.80
   1   7 -10   31.10   13.50
  -1  -7  10   57.89   11.70
   1   7  -9   13.50   12.00
  -1   7   9   38.50   10.10
  -1  -7   9   40.10    9.70
   1   7  -8   69.19   14.80
  -1   7   8   92.19   13.30
  -1  -7   8   79.29   12.00
   1   7  -7  856.81   54.69
   1   7  -7  917.01   44.90
  -1   7   7  947.31   41.80
  -1  -7   7  957.30   41.50
   1   7  -6    5.20   11.70
  -1   7   6   -7.50    7.00
   1   7  -6   16.00    9.90
  -1  -7   6    6.40    6.50
   1   7  -5 1015.40   47.50
  -1   7   5 1050.79   45.10
   1   7  -5 1059.59   59.29
  -1  -7   5 1037.00   44.30
  -1   7   4  129.69   14.30
   1   7  -4  129.39   16.10
   1   7  -4  139.89   23.50
  -1  -7   4  130.79   13.70
  -1   7   3  189.88   16.50
  -1   7   3  151.18   24.00
   1   7  -3  126.79   22.10
   1   7  -3  150.58   16.70
  -1  -7   3  140.39   14.50
   1   7  -2  252.27   29.80
   1   7  -2  172.78   18.00
  -1   7   2  200.78   17.40
  -1   7   2  202.28   27.60
  -1  -7   2  181.68   16.50
  -1  -7   2  178.88   11.20
  -1   7   1  591.74   43.30
  -1   7   1  695.63   31.90
   1   7  -1  644.14   43.60
   1   7  -1  647.94   33.10
  -1  -7   1  666.93   27.80
  -1  -7   1  644.34   31.50
  -1   7   0   96.89   12.90
   1   7   0  105.79   14.00
  -1   7   0  132.19   22.80
   1   7   0   87.19   19.30
   1  -7   0  103.59   12.80
  -1  -7   0   92.09    7.90
  -1   7  -1 2014.70   95.39
   1   7   1 2032.20   79.79
  -1   7  -1 2110.59   78.59
   1  -7   1 2017.80   78.39
  -1  -7  -1 2080.59   77.19
  -1   7  -2   58.39   16.50
  -1   7  -2   45.70   10.20
   1   7   2   47.00   10.50
  -1  -7  -2   73.19    7.40
   1  -7   2   54.49   10.20
   1   7   3   13.20    7.90
  -1   7  -3   11.70   12.30
  -1   7  -3   14.10    8.10
   1  -7   3   13.00    6.90
  -1  -7  -3    6.50    3.60
  -1   7  -4   70.49   17.30
   1   7   4   74.89   12.00
  -1   7  -4   49.60   10.80
   1  -7   4   43.90    9.30
  -1  -7  -4   52.99    6.90
   1   7   5   45.70   10.40
  -1   7  -5   49.90   16.00
  -1   7  -5   45.00   10.60
  -1  -7  -5   47.70    7.10
   1  -7   5   36.40    8.90
   1   7   6  278.27   20.50
  -1   7  -6  280.37   20.40
  -1   7  -6  363.16   37.10
  -1  -7  -6  315.97   15.20
   1  -7   6  312.97   19.70
  -1  -7  -6  283.57   17.00
  -1   7  -7  297.47   21.50
  -1   7  -7  275.27   31.70
   1   7   7  280.47   20.80
   1  -7   7  326.57   19.80
  -1  -7  -7  301.07   15.10
  -1  -7  -7  305.27   18.10
   1   7   8   73.29   12.60
  -1   7  -8   32.70   15.40
  -1   7  -8   83.39   14.20
  -1  -7  -8   55.39    8.90
   1  -7   8   58.39   10.90
   1   7   9  172.18   18.10
  -1   7  -9  191.28   19.50
  -1   7  -9  157.38   26.30
   1  -7   9  186.98   17.50
   1   7  10   97.69   15.00
  -1   7 -10   65.49   20.50
  -1   7 -10  117.49   16.10
   1  -7  10   91.99   13.60
  -1   7 -11  112.69   25.20
   1   7  11   81.99   15.10
  -1   7 -11  142.99   17.80
   1  -7  11  119.49   15.40
   1   7  12    0.30   10.60
  -1   7 -12    1.80   11.30
   1  -7  12   -0.80    8.80
   1   7  13   29.70   12.40
   1  -7  13   32.70   11.80
   1   7  14  107.79   17.90
   1  -7  14  120.09   17.30
   1   7  15   46.60   15.20
   1  -7  15   55.89   14.80
  -1   8  14   29.70   13.80
  -1  -8  14   30.90   13.60
   1   8 -13  119.89   21.10
  -1   8  13   81.09   15.40
  -1  -8  13   81.59   16.10
   1   8 -12  117.49   20.40
  -1   8  12   95.09   15.40
  -1  -8  12  128.49   17.40
  -1   8  11  254.97   22.50
   1   8 -11  236.38   25.70
  -1  -8  11  275.87   21.50
  -1   8  10   93.59   14.90
   1   8 -10  108.99   18.80
  -1  -8  10  141.99   16.90
  -1   8   9  655.13   34.80
   1   8  -9  700.23   38.70
  -1  -8   9  637.64   34.30
  -1   8   8   17.90   10.10
   1   8  -8   20.70   12.30
  -1  -8   8   21.60    9.50
  -1   8   7  215.58   19.70
   1   8  -7  244.38   23.90
  -1  -8   7  219.48   20.20
   1   8  -6  119.49   17.00
  -1   8   6  123.09   15.20
  -1  -8   6  115.49   14.60
  -1   8   5   86.99   13.70
   1   8  -5   89.09   15.40
  -1  -8   5   68.69   11.90
   1   8  -4  204.98   20.40
  -1   8   4  185.48   18.20
  -1  -8   4  204.98   18.80
   1   8  -3 1674.73   69.09
  -1   8   3 1581.94   66.59
  -1  -8   3 1762.32   67.89
   1   8  -2  376.66   25.40
  -1   8   2  345.17   23.40
  -1  -8   2  432.06   24.40
  -1   8   1  163.78   17.00
   1   8  -1  191.88   18.90
  -1  -8   1  146.39   15.70
  -1   8   0   -6.50    7.60
  -1   8   0   11.10   13.00
   1   8   0  -11.10    7.70
  -1   8  -1   20.40    9.50
  -1   8  -1   20.70   15.00
   1   8   1   35.50   10.60
   1  -8   1   17.60    8.80
  -1   8  -2  123.89   23.70
  -1   8  -2   94.09   13.80
   1   8   2  107.69   15.40
   1  -8   2   83.69   13.00
   1   8   3  445.96   26.30
  -1   8  -3  437.76   43.50
  -1   8  -3  405.36   25.30
   1  -8   3  403.16   24.80
  -1   8  -4   60.69   19.40
  -1   8  -4  136.49   15.90
   1   8   4  120.99   15.70
   1  -8   4  131.69   15.20
  -1   8  -5  408.06   24.50
  -1   8  -5  396.76   42.40
   1   8   5  292.97   23.40
   1  -8   5  371.76   23.10
  -1   8  -6  125.39   25.40
   1   8   6  113.39   16.00
  -1   8  -6  114.59   16.10
  -1  -8  -6  112.09   10.30
   1  -8   6  118.89   14.60
  -1   8  -7  380.16   25.60
   1   8   7  393.96   26.20
  -1   8  -7  419.86   43.50
  -1  -8  -7  369.96   18.80
   1  -8   7  419.96   25.00
  -1   8  -8   24.90   17.30
  -1   8  -8   19.20   11.30
   1   8   8   -2.20    9.90
   1  -8   8   13.90    9.40
  -1   8  -9  467.75   28.10
   1   8   9  398.16   27.30
   1  -8   9  436.56   26.90
   1   8  10   83.29   15.10
  -1   8 -10  119.69   17.20
   1  -8  10  104.79   15.40
   1   8  11    4.50   10.60
  -1   8 -11  -20.20   10.50
   1  -8  11    9.60    9.40
   1   8  12   64.89   15.10
   1  -8  12   53.69   13.50
   1   8  13   54.99   15.20
   1  -8  13   35.80   12.70
   1   8  14   21.50   14.10
   1  -8  14    9.30   12.30
  -1   9  13   29.30   13.60
   1   9 -13   43.20   17.80
  -1  -9  13   63.89   16.10
   1   9 -12    7.70   14.80
  -1   9  12    3.20   11.70
  -1  -9  12   -2.00   11.30
  -1   9  11  136.29   18.80
   1   9 -11  208.78   24.30
  -1  -9  11  186.08   21.60
   1   9 -10   45.70   15.30
  -1   9  10   50.19   14.60
  -1  -9  10   76.89   15.00
   1   9  -9   43.40   15.50
  -1   9   9   83.69   15.20
  -1  -9   9   31.60   11.90
   1   9  -8  179.18   22.50
  -1   9   8  171.28   18.70
  -1  -9   8  187.18   19.80
  -1   9   7  414.16   27.30
   1   9  -7  458.55   30.70
  -1  -9   7  467.55   28.60
  -1   9   6  292.47   22.20
   1   9  -6  292.77   27.00
  -1  -9   6  310.87   23.10
   1   9  -5  189.08   21.10
  -1   9   5  131.69   17.00
  -1  -9   5  161.38   18.30
  -1   9   4   10.70    9.50
   1   9  -4   19.00   10.30
  -1  -9   4    3.80    8.30
  -1   9   3    0.60    8.70
   1   9  -3    1.50    9.90
  -1  -9   3    0.40    7.70
  -1   9   2  321.77   22.70
   1   9  -2  294.77   25.80
  -1  -9   2  290.27   22.20
   1   9  -1  154.48   18.80
  -1   9   1  151.98   17.80
  -1   9   0   79.49   13.60
   1   9   0   64.39   13.80
  -1   9  -1  540.55   30.20
   1   9   1  507.05   31.10
   1   9   2  311.07   22.80
  -1   9  -2  274.37   23.80
   1  -9   2  282.67   22.30
   1   9   3   76.99   14.30
  -1   9  -3   72.19   13.80
   1  -9   3   81.09   13.70
   1   9   4   -0.50    9.60
  -1   9  -4    5.30    9.20
   1  -9   4   -0.20    8.50
   1   9   5  543.85   31.80
  -1   9  -5  523.75   30.40
  -1  -9  -5  518.35   24.20
   1  -9   5  497.45   30.20
  -1   9  -6  105.19   16.10
   1   9   6   82.39   15.30
  -1  -9  -6   87.59   10.30
   1  -9   6   81.49   14.20
   1   9   7  193.08   21.80
  -1   9  -7  252.97   22.90
   1  -9   7  193.98   20.10
  -1   9  -8   44.50   13.40
   1   9   8   27.30   13.10
   1  -9   8   41.40   12.20
   1   9   9   18.50   11.50
  -1   9  -9    5.70   11.30
   1  -9   9   -1.70    9.80
   1   9  10   44.90   14.30
  -1   9 -10   24.90   12.80
   1  -9  10   28.10   12.10
   1   9  11  434.26   30.70
   1  -9  11  449.26   30.20
   1   9  12   -4.00   12.20
   1  -9  12  -14.00   10.40
   1   9  13  143.39   21.20
   1  -9  13  170.68   21.80
  -1  10  11   -7.40   11.70
   1  10 -11    9.60   15.90
  -1 -10  11    4.00   12.40
   1  10 -10   80.29   19.80
  -1  10  10   61.59   15.60
  -1 -10  10   62.99   16.00
   1  10  -9   -1.20   13.00
  -1  10   9   -2.30   11.70
  -1 -10   9   10.00   11.70
  -1  10   8   -5.30   10.80
   1  10  -8    8.10   13.60
  -1 -10   8   10.50   11.00
  -1  10   7   70.59   15.10
   1  10  -7   58.99   16.30
  -1 -10   7   34.90   12.60
  -1  10   6   59.49   14.40
   1  10  -6   83.79   17.60
  -1 -10   6   80.59   15.30
   1  10  -5   -5.90   11.60
  -1  10   5   15.00   11.70
  -1 -10   5   11.90   10.10
  -1  10   4  143.39   18.60
   1  10  -4  132.19   19.90
  -1 -10   4  114.39   17.20
  -1  10   3  336.87   24.50
   1  10  -3  304.17   27.30
  -1 -10   3  262.37   24.60
  -1  10   2  209.38   21.20
   1  10  -2  177.88   21.30
  -1  10   1   28.50   12.00
   1  10  -1   15.40   12.10
  -1  10   0   -7.30    9.80
   1  10   0    4.20   10.80
  -1  10  -1  271.27   23.90
   1  10   1  243.38   24.10
  -1  10  -2    9.20   11.10
   1  10   2    1.60   11.10
   1 -10   2   -2.10    8.30
  -1  10  -3  191.78   20.60
   1  10   3  179.58   20.80
   1 -10   3  178.18   20.70
  -1  10  -4   95.89   16.90
   1  10   4   70.49   15.30
   1 -10   4   67.99   14.30
  -1  10  -5   68.89   14.80
   1  10   5   50.49   14.60
  -1 -10  -5   65.99   10.00
   1 -10   5   56.29   13.60
  -1  10  -6   25.90   12.00
   1  10   6   36.90   13.30
  -1 -10  -6   21.60    7.40
   1 -10   6   17.20   11.20
   1  10   7  323.07   28.00
  -1  10  -7  296.77   25.80
   1 -10   7  287.77   26.90
  -1  10  -8   91.39   16.60
   1  10   8   65.59   15.80
   1 -10   8   63.29   15.00
  -1  10  -9  215.38   23.00
   1  10   9  219.18   24.70
   1 -10   9  288.97   26.50
   1  10  10   46.60   16.10
   1 -10  10    2.90   11.90
   1  10  11   45.00   16.50
   1 -10  11    8.90   12.70
   1  11 -10   55.59   18.80
  -1  11   9   57.99   16.20
   1  11  -9   73.09   19.70
  -1 -11   9   78.79   17.90
  -1  11   8    7.90   12.90
   1  11  -8   15.20   15.60
  -1 -11   8    2.30   12.30
   1  11  -7  133.09   22.10
  -1  11   7   90.39   17.50
  -1 -11   7  125.89   19.80
  -1  11   6   35.60   14.00
   1  11  -6   48.60   17.40
  -1 -11   6   27.50   12.60
   1  11  -5   16.10   13.80
  -1  11   5   10.40   12.10
  -1 -11   5    9.70   11.40
   1  11  -4   -9.30   12.00
  -1  11   4   -2.60   11.60
  -1 -11   4    0.50    9.90
  -1  11   3   16.90   12.50
   1  11  -3   13.80   13.40
  -1  11   2   17.30   12.30
   1  11  -2   10.60   13.30
   1  11  -1    5.20   13.00
  -1  11   1   21.30   12.40
   1  11   0  250.87   26.10
  -1  11   0  283.07   25.30
  -1  11  -1  122.59   17.90
   1  11   1  115.99   19.40
  -1  11  -2   -2.50   11.40
   1  11   2    9.10   12.30
   1  11   3  164.48   21.00
  -1  11  -3  136.99   18.90
  -1  11  -4  224.18   22.70
   1  11   4  223.58   24.60
   1 -11   4  213.68   24.50
  -1 -11  -4  194.08   17.00
  -1  11  -5  278.27   25.50
   1  11   5  225.78   24.90
   1 -11   5  220.78   24.80
  -1 -11  -5  256.87   17.50
  -1  11  -6   15.60   13.20
   1  11   6    4.80   12.60
   1 -11   6   19.80   12.60
  -1  11  -7  138.29   19.10
   1  11   7  106.49   19.00
   1 -11   7  113.09   19.20
   1  11   8   30.40   15.40
  -1  11  -8   46.80   15.40
   1 -11   8   41.10   15.20
   1  11   9   14.70   14.80
   1 -11   9   10.40   13.50
   1  12  -6   38.60   17.20
  -1  12   6   -1.20   13.70
  -1 -12   6   22.50   13.60
   1  12  -5    0.40   15.30
  -1  12   5   -1.80   13.00
  -1 -12   5   -1.40   11.80
   1  12  -4   75.39   18.70
  -1  12   4   29.20   15.00
   1  12  -3  238.58   26.50
  -1  12   3  273.57   26.30
   1  12  -2   24.50   14.60
  -1  12   2  -16.40   11.70
  -1  12   1   21.40   14.20
   1  12  -1    6.90   15.20
   1  12   0   61.39   17.30
  -1  12   0   68.09   16.30
  -1  12  -1   17.90   14.10
   1  12   1   46.00   15.50
   1  12   2   17.60   15.00
  -1  12  -2   39.50   13.90
  -1 -12  -2   25.80    9.20
   1  12   3   46.10   16.50
  -1  12  -3   58.99   16.60
  -1 -12  -3   53.19   11.00
   1  12   4   94.29   19.20
  -1  12  -4   81.19   17.40
  -1 -12  -4   61.79   11.80
   1  12   5   47.00   17.20
  -1  12  -5   10.90   13.90
   1 -12   5   60.69   16.00
  -1  12  -6   47.40   16.10
   1 -12   6   29.20   15.20
  -2   0  18  498.65   30.40
  -2   0  17   13.00   10.00
  -2   0  16  145.39   16.10
  -2   0  15    2.90    7.60
  -2   0  14  556.44   27.90
  -2   0  13   -2.10    5.70
   2   0 -13   -0.40    7.90
  -2   0  12  885.81   36.70
   2   0 -12  837.72   44.40
  -2   0  11   -6.50    4.50
   2   0 -11    6.30    6.80
   2   0 -10 1443.16   62.19
  -2   0  10 1446.06   53.99
   2   0  -9    2.00    5.00
  -2   0   9    0.20    3.10
  -2   0   9    2.30    4.10
   2   0  -8   40.80    7.70
  -2   0   8   35.80    5.40
  -2   0   8   47.20    6.20
   2   0  -7   -2.80    3.60
  -2   0   7    1.80    3.20
  -2   0   7    2.10    2.60
  -2   0   6 5702.13  202.58
  -2   0   6 5575.04  190.78
   2   0  -6 5703.53  204.98
  -2   0   5    0.60    1.50
  -2   0   5   -2.40    2.50
   2   0  -5   -1.40    3.00
  -2   0   5    0.90    2.40
  -2   0   4  277.37   12.20
  -2   0   4  296.27   13.60
  -2   0   4  290.87   10.40
   2   0  -4  306.57   14.90
  -2   0   3    1.10    1.70
  -2   0   3    2.70    2.00
  -2   0   3    0.30    2.10
   2   0  -3   -0.90    2.40
  -2   0   2    8.30    1.90
  -2   0   2    2.50    2.20
  -2   0   2    9.80    2.80
   2   0  -2    7.20    2.60
  -2   0   2    7.70    1.80
  -2   0   1   -1.60    1.70
  -2   0   1   -6.30    1.60
  -2   0   1   -5.00    1.30
   2   0  -1   -4.70    1.70
  -2   0   1   -3.90    1.00
  -2   0   1   -2.70    1.60
  -2   0   0 1340.47   49.90
  -2   0   0 1387.76   45.50
  -2   0  -1    0.20    1.90
  -2   0  -1   -0.40    2.00
   2   0   2 3477.85  118.09
  -2   0  -2 3463.25  116.09
  -2   0  -2 3562.84  124.89
  -2   0  -2 3583.24  127.49
  -2   0  -2 3618.54  124.89
  -2   0  -3   -7.30    2.70
   2   0   3   -7.80    1.70
  -2   0  -3   -4.40    1.60
  -2   0  -3   -4.30    1.60
  -2   0  -3   -6.60    1.90
  -2   0  -4 1472.45   53.49
  -2   0  -4 1418.36   53.59
   2   0   4 1475.45   50.39
  -2   0  -5   -2.40    2.50
  -2   0  -5   -3.00    2.20
   2   0   5    1.00    2.70
  -2   0  -6  156.78   10.20
   2   0   6  151.98    8.90
  -2   0  -6  159.68   10.50
  -2   0  -7   -0.30    3.20
   2   0   7   -0.70    3.10
  -2   0  -7   -3.90    3.10
  -2   0  -8    6.00    4.60
   2   0   8    5.30    3.90
  -2   0  -8   15.30    5.10
  -2   0  -9    0.10    4.80
   2   0   9    0.60    4.20
  -2   0 -10    2.60    6.00
   2   0  10    6.40    5.00
  -2   0 -11    1.90    6.00
   2   0  11   -0.60    5.20
   2   0  12  550.24   25.70
  -2   0 -12  521.35   32.10
   2   0  13   -2.10    6.30
  -2   0 -13   -5.10    8.00
   2   0  14   40.50    9.60
  -2   0 -14   63.69   15.10
   2   0  15    9.30    8.30
  -2   0 -15   16.80   12.50
   2   0  16  625.54   31.90
  -2   0 -16  545.45   42.70
  -2   0 -17   13.80   15.80
   2   0  17    9.00   10.80
   2   0  18   28.40   12.90
  -2   1  18   42.50   13.20
  -2  -1  18   20.80   11.80
  -2   1  17   27.20   11.20
  -2  -1  17   42.60   11.80
  -2   1  16  116.19   14.50
  -2  -1  16   69.89   12.50
  -2   1  15  211.68   16.80
  -2  -1  15  216.58   17.40
  -2   1  14  760.22   35.10
  -2  -1  14  767.92   34.80
   2   1 -13   25.80   11.20
  -2   1  13   54.19    9.60
   2  -1 -13   31.00   10.20
  -2  -1  13   30.60    8.00
  -2   1  12  199.98   14.40
   2   1 -12  182.08   21.00
  -2  -1  12  185.38   13.40
   2  -1 -12  185.48   19.70
  -2   1  11   21.80    6.20
   2   1 -11   17.50    8.50
  -2  -1  11   20.40    6.00
   2  -1 -11   -3.00    5.90
   2   1 -10 2304.67   93.29
  -2   1  10 2241.28   82.09
  -2  -1  10 2328.37   81.99
   2  -1 -10 2274.87   90.99
  -2   1   9  106.79    9.40
  -2   1   9   95.19    9.30
   2   1  -9   85.29   12.50
  -2  -1   9   92.09    8.20
  -2  -1   9   89.49    8.70
  -2  -1   9   89.29    5.00
   2  -1  -9   89.19   11.00
   2   1  -8 1282.77   55.89
  -2   1   8 1325.07   48.60
  -2   1   8 1291.17   52.09
  -2  -1   8 1379.56   50.59
   2  -1  -8 1292.67   53.79
  -2  -1   8 1292.57   48.30
  -2  -1   8 1322.27   43.90
  -2   1   7  901.81   37.50
  -2   1   7  880.31   34.30
   2   1  -7  947.91   40.70
  -2  -1   7  905.71   35.60
  -2  -1   7  892.51   30.60
   2  -1  -7  889.91   38.20
  -2  -1   7  923.91   34.10
  -2   1   6  531.75   20.60
  -2   1   6  467.55   22.60
   2   1  -6  472.55   24.50
  -2  -1   6  508.85   20.10
   2  -1  -6  494.55   22.80
  -2  -1   6  484.05   20.70
  -2   1   5  379.96   18.20
  -2   1   5  385.56   15.80
   2   1  -5  341.57   19.20
   2  -1  -5  388.36   17.70
  -2  -1   5  357.46   15.40
  -2  -1   5  371.36   16.00
  -2   1   4   31.60    4.00
  -2   1   4   33.60    5.40
   2   1  -4   35.70    6.10
  -2  -1   4   24.10    3.40
   2  -1  -4   32.70    4.30
  -2  -1   4   31.30    3.50
  -2   1   3  193.88   11.30
  -2   1   3  170.78    8.30
   2   1  -3  159.98   11.30
  -2  -1   3  170.78    8.10
   2  -1  -3  200.58    9.30
  -2  -1   3  166.78    7.20
  -2  -1   3  160.88    8.10
  -2   1   2 7788.72  288.17
  -2   1   2 8106.09  287.67
  -2   1   2 8355.26  285.77
  -2   1   2 8095.59  269.67
   2   1  -2 8031.70  288.27
   2  -1  -2 8110.29  285.97
  -2  -1   2 8237.78  262.27
  -2  -1   2 8466.35  288.37
  -2  -1   2 7683.03  269.67
   2   1  -1  281.67   14.00
  -2   1   1  261.97   14.80
  -2   1   1  294.47   11.10
  -2   1   1  277.37   10.40
  -2   1   1  272.17   11.70
  -2  -1   1  280.07   10.50
  -2  -1   1  274.07   10.80
  -2  -1   1  280.57   14.30
  -2  -1   1  256.27   10.80
   2  -1  -1  286.17   11.20
  -2   1   0    4.20    3.40
  -2   1   0    5.20    2.10
  -2   1   0    2.40    1.00
  -2   1   0    4.70    1.10
  -2   1   0    4.60    1.10
  -2  -1   0    3.40    1.70
  -2  -1   0    3.00    4.00
  -2  -1   0    4.00    1.00
   2  -1   0    2.10    1.50
  -2  -1   0    6.40    1.90
  -2   1  -1  190.08    9.30
  -2   1  -1  183.78    7.30
  -2   1  -1  197.38    9.20
  -2  -1  -1  185.58    8.60
   2  -1   1  186.28    6.90
  -2  -1  -1  195.18    7.80
  -2  -1  -1  166.98   11.20
  -2  -1  -1  185.98    7.30
   2   1   2  113.49    6.90
  -2   1  -2  110.99    6.90
  -2   1  -2  101.69    4.80
  -2  -1  -2  112.39    6.60
  -2  -1  -2  126.29    5.80
   2  -1   2  104.59    4.90
  -2  -1  -2  129.99    8.50
  -2  -1  -2  114.49    5.20
  -2   1  -3   15.60    2.20
  -2   1  -3    9.00    3.30
  -2   1  -3   13.00    3.00
  -2   1  -3   13.30    2.00
   2   1   3   14.00    3.60
  -2  -1  -3   12.20    4.10
  -2  -1  -3   11.30    2.20
   2  -1   3   14.60    2.40
  -2  -1  -3   15.70    3.00
  -2   1  -4  841.22   32.80
   2   1   4  796.52   30.10
  -2   1  -4  857.31   30.50
  -2  -1  -4  822.42   30.90
  -2  -1  -4  768.52   28.50
   2  -1   4  824.72   29.00
  -2  -1  -4  781.92   32.80
  -2   1  -5   35.10    3.80
  -2   1  -5   29.00    5.20
   2   1   5   51.09    5.40
  -2  -1  -5   33.70    4.20
   2  -1   5   33.70    4.10
  -2  -1  -5   41.30    6.20
  -2  -1  -5   40.80    4.50
   2   1   6  506.45   21.70
  -2   1  -6  557.44   22.40
  -2   1  -6  531.35   24.80
  -2  -1  -6  498.55   20.00
   2  -1   6  532.95   20.80
  -2  -1  -6  587.44   25.60
  -2  -1  -6  531.95   23.00
   2   1   7  251.07   13.80
  -2   1  -7  307.47   14.70
  -2   1  -7  281.97   17.00
   2  -1   7  305.07   13.30
  -2  -1  -7  251.27   14.80
  -2  -1  -7  263.17   17.00
   2   1   8  924.21   36.90
  -2   1  -8 1001.40   39.60
  -2   1  -8  984.90   42.60
  -2  -1  -8  941.91   40.40
   2  -1   8  946.31   36.10
  -2  -1  -8  949.40   42.30
  -2   1  -9   92.49   12.00
   2   1   9   85.29    9.00
  -2  -1  -9   82.29   10.30
   2  -1   9   95.69    8.60
   2   1  10   28.40    6.50
  -2   1 -10   42.00    9.50
   2  -1  10   23.50    5.80
  -2  -1 -10   17.60    6.70
  -2   1 -11   13.80    8.00
   2   1  11   19.60    6.80
  -2  -1 -11   21.00    7.90
   2  -1  11   32.10    6.70
   2   1  12  213.78   15.50
  -2   1 -12  198.98   21.20
   2  -1  12  239.38   15.20
  -2  -1 -12  196.48   20.10
  -2   1 -13   21.20   11.60
   2   1  13   21.90    8.30
   2  -1  13   19.90    7.40
  -2  -1 -13   16.70    9.80
  -2   1 -14   92.09   17.60
   2   1  14   74.29   11.70
  -2  -1 -14   80.49   16.00
   2  -1  14   83.89   11.20
   2   1  15    2.50    8.00
  -2   1 -15    8.10   12.10
   2  -1  15   -1.20    7.60
  -2  -1 -15   13.20   12.40
   2   1  16  288.27   21.40
  -2   1 -16  206.68   29.00
   2  -1  16  313.67   21.20
  -2  -1 -16  274.17   31.00
  -2   1 -17   37.30   19.40
   2   1  17   36.40   12.60
   2  -1  17   34.20   12.20
   2   1  18   25.40   12.90
   2  -1  18   47.50   13.40
  -2   2  18  117.19   16.50
  -2  -2  18  115.19   16.60
  -2   2  17   30.00   11.50
  -2  -2  17   34.60   10.50
  -2   2  16  256.07   20.40
  -2  -2  16  303.67   20.80
  -2   2  15    5.20    7.70
  -2  -2  15   -4.70    7.40
  -2   2  14  153.28   15.20
  -2  -2  14  151.38   15.20
   2   2 -13  179.68   23.10
  -2   2  13  235.18   16.70
  -2  -2  13  229.88   16.20
  -2   2  12  200.88   14.70
   2   2 -12  154.48   20.40
  -2  -2  12  186.58   13.60
   2  -2 -12  170.48   17.90
  -2   2  11  814.62   33.50
   2   2 -11  754.92   42.00
   2  -2 -11  750.02   38.00
  -2  -2  11  758.32   32.70
  -2   2  10  566.24   25.20
   2   2 -10  532.05   32.20
  -2  -2  10  540.75   24.30
   2  -2 -10  516.35   28.40
  -2   2   9   30.80    6.20
  -2   2   9   39.20    7.00
   2   2  -9   12.90    7.30
  -2  -2   9   11.50    3.40
  -2  -2   9   14.10    5.00
   2  -2  -9   16.10    5.80
   2   2  -8    4.10    5.70
  -2   2   8   -0.20    4.10
  -2   2   8   -4.20    3.70
   2  -2  -8    3.90    4.00
  -2  -2   8   -1.40    2.10
  -2  -2   8    7.20    4.10
   2   2  -7  392.36   23.00
  -2   2   7  344.87   16.80
  -2   2   7  341.97   19.80
  -2  -2   7  357.96   16.70
  -2  -2   7  380.26   16.50
   2  -2  -7  360.26   18.60
  -2   2   6 4070.59  151.48
  -2   2   6 4206.78  140.49
   2   2  -6 4200.48  153.88
   2  -2  -6 3959.00  148.89
  -2  -2   6 4034.00  139.89
  -2  -2   6 4167.68  147.19
  -2   2   5 1077.59   44.70
   2   2  -5 1030.80   45.60
  -2   2   5 1056.09   39.10
   2  -2  -5 1107.59   41.60
  -2  -2   5 1071.79   40.10
  -2  -2   5 1031.20   38.80
  -2   2   4   95.99    7.10
  -2   2   4   90.69   10.30
   2   2  -4  106.99   11.20
  -2  -2   4   89.69    5.70
  -2  -2   4   96.39    6.70
   2  -2  -4  105.09    7.10
  -2   2   3  970.80   35.80
  -2   2   3  978.50   42.40
   2   2  -3 1006.10   42.10
  -2   2   3 1022.60   36.30
  -2  -2   3  980.90   35.70
  -2  -2   3  992.30   36.70
   2  -2  -3  969.90   37.30
  -2   2   2   46.70    8.70
  -2   2   2   63.09    5.30
  -2   2   2   55.99    4.20
   2   2  -2   52.19    8.10
  -2  -2   2   37.70    4.50
  -2  -2   2   38.00    3.50
   2  -2  -2   48.00    4.20
   2   2  -1  267.77   15.80
  -2   2   1  200.88   16.20
  -2   2   1  229.58   10.00
  -2   2   1  218.38   10.30
  -2   2   1  221.08    9.80
  -2  -2   1  234.28    9.60
   2  -2  -1  232.68    9.80
  -2  -2   1  240.18   10.80
  -2  -2   1  260.87   16.10
  -2   2   0  616.94   22.80
  -2   2   0  604.14   21.90
  -2   2   0  576.54   21.60
  -2   2   0  591.44   27.60
   2   2   0  564.14   27.30
  -2  -2   0  573.74   20.80
   2  -2   0  593.84   22.00
   2  -2   0  573.94   21.70
  -2  -2   0  567.94   28.10
  -2  -2   0  579.54   22.30
  -2  -2   0  590.44   21.80
  -2  -2   0  558.64   22.10
  -2   2  -1  603.24   22.20
  -2   2  -1  610.24   27.10
   2   2   1  589.44   27.50
   2   2   1  600.14   24.10
  -2   2  -1  602.04   22.30
  -2  -2  -1  593.74   22.40
  -2  -2  -1  609.44   21.40
   2  -2   1  588.64   21.90
  -2  -2  -1  604.44   22.50
  -2  -2  -1  603.54   23.10
  -2  -2  -1  585.84   29.10
  -2   2  -2 5279.37  180.78
   2   2   2 5209.88  173.28
  -2   2  -2 4996.60  184.78
  -2   2  -2 5139.19  171.88
  -2  -2  -2 5236.58  166.78
   2  -2   2 5023.70  171.18
  -2  -2  -2 5029.50  186.78
  -2  -2  -2 5105.99  180.98
  -2  -2  -2 5015.10  182.48
  -2   2  -3  392.26   19.10
  -2   2  -3  389.46   14.90
   2   2   3  355.96   16.60
  -2   2  -3  386.16   16.00
  -2  -2  -3  352.16   14.10
  -2  -2  -3  371.66   20.90
  -2  -2  -3  383.16   15.20
   2  -2   3  377.96   14.60
  -2  -2  -3  346.37   15.60
  -2   2  -4 1320.67   45.90
  -2   2  -4 1251.07   49.99
   2   2   4 1223.48   45.60
  -2  -2  -4 1254.77   46.20
  -2  -2  -4 1189.38   50.99
  -2  -2  -4 1217.38   42.30
   2  -2   4 1247.88   43.70
  -2   2  -5  117.79    6.70
  -2   2  -5  106.79   10.60
   2   2   5   94.09    8.50
  -2  -2  -5   98.79   11.20
   2  -2   5  129.69    7.10
  -2  -2  -5  107.09    6.30
  -2  -2  -5   91.29    6.90
   2   2   6  428.36   20.10
  -2   2  -6  447.76   23.80
  -2   2  -6  490.85   19.50
  -2  -2  -6  438.76   17.50
  -2  -2  -6  458.45   20.30
  -2  -2  -6  454.25   24.90
   2  -2   6  457.65   18.50
  -2   2  -7   33.50    4.80
  -2   2  -7   24.30    7.00
   2   2   7   35.90    6.40
   2  -2   7   40.50    5.10
  -2  -2  -7   36.30    4.90
  -2  -2  -7   35.50    8.40
  -2  -2  -7   26.20    5.10
   2   2   8    4.80    4.80
  -2   2  -8   -1.30    5.00
  -2  -2  -8    9.90    4.90
   2  -2   8    4.00    3.50
  -2  -2  -8   10.80    4.10
   2   2   9  154.28   11.90
  -2   2  -9  139.99   16.00
   2  -2   9  163.98   10.50
  -2  -2  -9  147.99   12.60
  -2   2 -10    6.60    7.20
   2   2  10    7.40    6.10
  -2  -2 -10   11.90    6.10
   2  -2  10    1.30    4.40
   2   2  11   -2.20    5.60
  -2   2 -11    9.40    8.50
   2  -2  11   11.50    5.50
  -2  -2 -11    4.10    6.60
  -2   2 -12 1052.19   53.09
   2   2  12  978.30   42.50
  -2  -2 -12  967.90   48.50
   2  -2  12 1053.89   41.50
   2   2  13   25.60    8.50
  -2   2 -13   30.30   12.50
  -2  -2 -13   18.40    9.80
   2  -2  13   31.40    8.20
   2   2  14   18.60    9.00
  -2   2 -14   28.00   13.60
  -2  -2 -14   33.30   11.80
   2  -2  14   24.70    8.00
   2   2  15   65.79   12.40
  -2   2 -15   17.60   14.80
  -2  -2 -15   77.29   17.20
   2  -2  15   52.99   10.70
  -2   2 -16  113.39   23.60
   2   2  16  126.19   16.20
   2  -2  16  131.99   15.40
  -2  -2 -16  124.09   22.00
   2   2  17   73.19   15.00
  -2   2 -17   46.00   21.50
   2  -2  17   77.09   14.30
   2   2  18   59.19   15.30
   2  -2  18   44.30   14.10
  -2   3  18   -1.10   11.30
  -2  -3  18    2.70   10.80
  -2   3  17   39.80   12.50
  -2  -3  17   56.89   13.00
  -2   3  16  -11.60    9.00
  -2  -3  16    8.70    8.60
  -2   3  15  143.79   15.90
  -2  -3  15  139.69   15.40
  -2   3  14  185.48   17.30
  -2  -3  14  190.28   17.20
  -2   3  13   67.49   10.70
  -2  -3  13   49.50    9.50
  -2   3  12   46.20    9.30
   2   3 -12   51.49   14.30
  -2  -3  12   73.99    9.80
   2   3 -11  138.09   19.60
  -2   3  11  102.29   11.10
  -2  -3  11  106.49   11.20
   2  -3 -11   69.39   11.40
   2   3 -10  572.74   34.60
  -2   3  10  517.95   25.20
  -2  -3  10  565.94   25.20
   2  -3 -10  517.95   28.20
   2   3  -9 1046.70   53.99
  -2   3   9 1173.18   45.20
  -2  -3   9 1148.19   44.60
   2  -3  -9 1201.08   48.90
  -2   3   8   13.50    5.60
   2   3  -8   15.10    7.50
  -2   3   8   11.40    6.00
  -2  -3   8   14.80    3.40
  -2  -3   8    4.60    4.20
   2  -3  -8    4.10    4.10
  -2   3   7  600.64   29.90
  -2   3   7  544.05   24.40
   2   3  -7  559.44   31.50
  -2  -3   7  576.24   23.60
   2  -3  -7  554.84   25.70
  -2  -3   7  568.14   24.10
  -2   3   6   27.70    5.30
  -2   3   6   29.40    7.80
   2   3  -6   22.40    7.80
   2  -3  -6   16.40    4.10
  -2  -3   6    9.50    2.70
  -2  -3   6   19.40    4.40
  -2   3   5  139.89   14.60
  -2   3   5  118.09    9.40
   2   3  -5  145.89   15.10
  -2  -3   5  148.39    9.20
   2  -3  -5  126.09    8.70
  -2  -3   5  148.39    7.80
  -2   3   4  404.76   24.20
  -2   3   4  397.96   15.50
  -2   3   4  397.16   17.90
   2   3  -4  402.66   23.60
  -2  -3   4  397.06   17.50
  -2  -3   4  395.46   16.60
   2  -3  -4  405.46   17.50
  -2   3   3  519.05   29.10
  -2   3   3  516.85   21.80
  -2   3   3  508.05   20.00
   2   3  -3  531.35   28.00
  -2  -3   3  522.25   21.40
  -2  -3   3  558.44   20.90
   2  -3  -3  531.35   21.40
   2   3  -2 2765.12  102.59
  -2   3   2 2471.45  103.09
  -2   3   2 2708.43   94.39
  -2   3   2 2626.04   91.29
   2  -3  -2 2649.83   94.69
  -2  -3   2 2626.74   91.09
  -2  -3   2 2579.34   94.49
  -2   3   1 1357.96   60.49
  -2   3   1 1495.45   51.29
   2   3  -1 1380.56   59.49
   2  -3  -1 1425.46   51.99
  -2  -3   1 1377.46   51.99
   2  -3  -1 1449.65   52.09
  -2  -3   1 1471.85   51.39
  -2   3   0 3122.59  103.59
  -2   3   0 2942.71  115.69
   2   3   0 2906.31  115.19
  -2   3   0 3096.59  107.69
  -2  -3   0 2826.02  107.49
   2  -3   0 3108.59  103.89
  -2  -3   0 2822.72  103.69
   2  -3   0 3249.48  107.59
   2   3   1  357.06   18.50
   2   3   1  386.86   23.00
  -2   3  -1  394.96   15.60
  -2   3  -1  409.46   17.30
  -2   3  -1  374.76   22.70
   2  -3   1  378.46   16.40
   2  -3   1  396.46   15.50
  -2  -3  -1  384.86   15.90
  -2  -3  -1  414.06   15.70
  -2   3  -2 2326.57   82.09
   2   3   2 2322.97   83.59
  -2   3  -2 2380.16   84.59
   2   3   2 2426.46   91.69
  -2   3  -2 2237.98   91.19
   2  -3   2 2369.06   81.29
  -2  -3  -2 2380.06   84.89
  -2  -3  -2 2382.96   84.89
  -2  -3  -2 2390.46   78.59
  -2  -3  -2 2333.37   94.09
   2   3   3  175.78   13.40
  -2   3  -3  148.89   10.20
  -2   3  -3  167.78    7.90
  -2   3  -3  161.88   13.80
   2   3   3  161.98   11.00
  -2  -3  -3  146.39    7.80
   2  -3   3  154.68    8.70
  -2  -3  -3  168.48   17.40
  -2  -3  -3  150.78    7.70
  -2  -3  -3  155.88    8.10
  -2   3  -4  635.34   22.50
  -2   3  -4  557.24   28.40
   2   3   4  552.34   26.50
  -2   3  -4  538.85   23.50
   2   3   4  530.95   24.20
   2  -3   4  564.04   22.00
  -2  -3  -4  522.35   22.40
  -2  -3  -4  558.64   30.90
  -2  -3  -4  558.14   20.60
  -2   3  -5   11.90    4.70
   2   3   5    7.10    4.70
  -2   3  -5   14.80    6.40
  -2   3  -5    7.50    2.40
  -2  -3  -5    4.80    2.50
  -2  -3  -5    9.40    7.10
  -2  -3  -5    6.40    2.60
   2  -3   5   12.80    3.50
   2   3   6  393.56   18.90
  -2   3  -6  346.57   22.40
  -2   3  -6  381.96   16.80
  -2  -3  -6  382.36   15.00
  -2  -3  -6  352.56   17.40
  -2  -3  -6  380.06   25.00
   2  -3   6  362.76   16.40
  -2   3  -7   84.69   12.30
   2   3   7  115.29   10.70
  -2   3  -7  107.49    8.10
  -2  -3  -7  126.89    7.50
  -2  -3  -7   93.59    8.80
   2  -3   7   91.89    8.20
   2   3   8 1894.01   71.19
  -2   3  -8 1953.30   80.89
  -2  -3  -8 1921.91   74.39
  -2  -3  -8 1950.50   65.79
   2  -3   8 1932.01   69.19
  -2   3  -9   10.10    8.10
   2   3   9    7.30    6.40
  -2  -3  -9   -2.10    4.20
   2  -3   9    0.70    4.10
   2   3  10  686.23   31.30
  -2   3 -10  685.03   39.10
  -2  -3 -10  703.03   33.80
   2  -3  10  698.33   29.70
  -2   3 -11   32.10   11.90
   2   3  11   45.70    9.30
  -2  -3 -11   39.00    9.50
   2  -3  11   36.20    7.40
  -2   3 -12   23.80   12.40
   2   3  12   13.70    8.40
   2  -3  12   15.70    6.90
  -2  -3 -12   17.30    9.00
   2   3  13  216.08   18.30
  -2   3 -13  162.78   23.00
  -2  -3 -13  176.48   19.90
   2  -3  13  192.98   15.40
   2   3  14  113.49   14.50
  -2   3 -14   77.89   19.70
  -2  -3 -14   47.10   14.00
   2  -3  14   89.49   12.30
   2   3  15   89.59   14.40
  -2   3 -15   85.09   20.70
  -2  -3 -15   78.79   17.80
   2  -3  15   77.39   12.30
   2   3  16  361.96   25.40
  -2   3 -16  250.27   33.50
   2  -3  16  357.96   23.60
   2   3  17    8.40   11.80
   2  -3  17   -4.70    9.70
   2   3  18   -9.60   12.60
   2  -3  18   -4.40   11.40
  -2   4  17   83.79   15.00
  -2  -4  17   83.99   15.30
  -2   4  16   91.89   14.80
  -2  -4  16   90.19   14.40
  -2   4  15   31.10   11.00
  -2  -4  15    0.00    8.70
  -2   4  14   28.00    9.80
  -2  -4  14   39.60    9.90
  -2   4  13   84.99   12.20
  -2  -4  13   84.49   12.00
  -2   4  12   18.80    8.30
  -2  -4  12    5.30    7.00
  -2   4  11  442.86   23.10
   2   4 -11  443.36   33.50
  -2  -4  11  409.06   22.60
  -2   4  10   55.89    9.50
   2   4 -10   62.99   15.10
   2  -4 -10   55.69    9.30
  -2  -4  10   51.99    8.50
  -2   4   9   51.99    8.50
   2   4  -9   39.60   11.50
   2  -4  -9   39.30    7.60
  -2  -4   9   32.90    7.10
  -2   4   8   29.30    6.70
  -2   4   8   11.80    7.80
   2   4  -8   13.80    8.70
   2  -4  -8   21.60    5.80
  -2  -4   8    9.90    5.30
   2   4  -7  146.19   18.50
  -2   4   7  143.69   11.30
  -2   4   7  170.18   18.20
   2  -4  -7  134.09   10.60
  -2  -4   7  130.99   10.50
  -2  -4   7  143.99    8.80
   2   4  -6  748.93   39.10
  -2   4   6  737.73   38.00
  -2   4   6  716.93   26.80
  -2   4   6  666.23   29.80
  -2  -4   6  737.43   29.80
   2  -4  -6  687.73   30.20
  -2  -4   6  745.43   28.80
   2   4  -5  647.34   36.40
  -2   4   5  687.23   37.10
  -2   4   5  737.03   29.30
  -2  -4   5  670.13   27.50
  -2  -4   5  674.13   28.40
   2  -4  -5  729.93   29.00
   2   4  -4 1268.37   56.89
  -2   4   4 1276.57   47.30
  -2   4   4 1161.58   56.79
  -2  -4   4 1214.28   46.80
   2  -4  -4 1287.07   47.80
  -2  -4   4 1275.87   46.80
  -2   4   3  259.37   21.70
   2   4  -3  263.97   20.30
  -2   4   3  263.07   13.90
  -2  -4   3  251.57   11.80
  -2  -4   3  245.68   13.40
   2  -4  -3  251.37   12.10
  -2   4   2 1133.79   42.30
   2   4  -2 1085.69   51.29
  -2   4   2 1033.20   52.39
  -2  -4   2 1102.59   41.70
  -2  -4   2 1151.08   42.30
   2  -4  -2 1137.09   42.00
  -2   4   1  943.61   37.00
  -2   4   1  925.31   46.90
   2   4  -1  954.70   46.10
   2  -4  -1  957.80   38.10
  -2  -4   1  986.60   36.30
  -2  -4   1  962.60   37.40
   2  -4  -1  966.90   36.30
   2   4   0  814.42   35.30
   2   4   0  810.22   41.30
  -2   4   0  845.12   42.40
  -2   4   0  865.01   33.10
  -2  -4   0  854.41   32.10
   2  -4   0  878.71   33.60
   2  -4   0  889.01   31.80
  -2  -4   0  816.42   33.20
  -2  -4   0  727.93   31.50
   2   4   1  429.26   21.30
  -2   4  -1  385.56   25.90
   2   4   1  381.66   25.80
  -2   4  -1  387.86   18.80
   2  -4   1  385.06   18.30
  -2  -4  -1  424.06   17.30
   2  -4   1  404.36   16.70
  -2  -4  -1  434.26   16.30
  -2   4  -2  666.63   35.90
   2   4   2  651.33   35.50
  -2   4  -2  707.43   28.70
   2   4   2  722.63   30.40
  -2  -4  -2  699.03   27.30
   2  -4   2  725.03   26.80
   2  -4   2  689.53   27.70
  -2  -4  -2  678.23   26.10
  -2   4  -3    0.50    5.70
  -2   4  -3    1.00    4.40
   2   4   3   -3.60    4.50
  -2   4  -3    1.20    1.80
   2   4   3   -2.80    5.30
   2  -4   3    0.00    1.50
  -2  -4  -3    3.40    2.10
  -2  -4  -3    3.60    2.10
   2  -4   3    2.40    1.50
  -2  -4  -3    3.90    2.60
   2  -4   3   -0.30    3.20
  -2   4  -4 3422.06  134.39
  -2   4  -4 3713.93  125.29
   2   4   4 3283.37  122.09
   2   4   4 3448.16  132.09
  -2   4  -4 3472.55  121.29
   2  -4   4 3431.66  119.69
  -2  -4  -4 3572.64  115.29
  -2  -4  -4 3430.16  125.49
  -2   4  -5  142.49   16.90
  -2   4  -5  153.78    8.80
   2   4   5  182.48   15.70
   2   4   5  148.69   12.90
  -2   4  -5  142.49   12.20
  -2  -4  -5  135.79    8.20
  -2  -4  -5  148.49    9.30
   2  -4   5  132.39    9.30
  -2   4  -6 1978.00   84.29
   2   4   6 2009.80   74.99
  -2   4  -6 2024.00   74.19
  -2  -4  -6 1988.60   75.79
   2  -4   6 2051.19   72.29
  -2  -4  -6 2067.69   68.39
  -2   4  -7  465.25   29.60
  -2   4  -7  486.55   23.80
   2   4   7  449.56   23.80
  -2  -4  -7  496.95   22.70
   2  -4   7  485.25   21.40
  -2  -4  -7  474.75   18.90
  -2   4  -8  130.09   17.50
  -2   4  -8  171.68   14.30
   2   4   8  140.39   13.30
   2  -4   8  139.89   10.70
  -2  -4  -8  154.48   11.90
  -2  -4  -8  147.49    9.10
  -2   4  -9   -1.90    8.00
   2   4   9   12.40    7.00
   2  -4   9    3.70    5.00
  -2  -4  -9    2.20    5.00
  -2   4 -10   15.40   10.70
   2   4  10    4.60    6.70
  -2  -4 -10    3.30    5.70
   2  -4  10   18.30    6.10
   2   4  11  155.48   15.80
  -2   4 -11  185.68   23.80
  -2  -4 -11  173.58   16.80
   2  -4  11  171.78   13.70
   2   4  12  884.11   40.20
  -2   4 -12  900.81   52.09
  -2  -4 -12  812.22   43.10
   2  -4  12  906.31   38.50
   2   4  13   97.69   14.30
  -2   4 -13   49.80   16.20
   2  -4  13   82.09   11.60
  -2  -4 -13   97.69   15.50
   2   4  14   99.39   15.20
  -2   4 -14  116.29   23.10
  -2  -4 -14   90.59   17.00
   2  -4  14   87.39   12.70
  -2   4 -15    5.20   15.30
   2   4  15   11.40   10.00
  -2  -4 -15   -6.00   11.40
   2  -4  15   18.20    9.40
   2   4  16   23.90   13.30
  -2   4 -16   32.30   20.20
   2  -4  16   51.79   12.80
   2   4  17  132.99   19.30
   2  -4  17  102.79   16.00
  -2   5  17    4.90   11.90
  -2  -5  17   21.90   12.40
  -2   5  16   75.59   14.80
  -2  -5  16   74.49   14.20
  -2   5  15  159.88   17.80
  -2  -5  15  199.68   19.60
  -2   5  14   31.80   11.00
  -2  -5  14   37.20   10.60
  -2   5  13  121.29   14.80
  -2  -5  13  112.99   14.00
  -2   5  12   80.29   12.10
  -2  -5  12   72.39   11.40
  -2   5  11    0.60    7.10
  -2  -5  11   -6.60    6.00
   2   5 -10  289.17   30.20
  -2   5  10  273.17   18.30
  -2  -5  10  301.67   18.60
   2   5  -9  170.28   23.30
  -2   5   9  176.68   14.10
   2  -5  -9  174.38   13.90
  -2  -5   9  171.58   13.20
   2   5  -8   36.70   12.30
  -2   5   8   65.69    9.60
  -2  -5   8   37.70    7.80
   2  -5  -8   48.80    8.00
  -2   5   7  158.38   19.30
  -2   5   7  167.88   14.50
   2   5  -7  189.98   22.60
   2  -5  -7  188.48   12.80
  -2  -5   7  192.98   13.70
  -2   5   6   69.89   13.60
   2   5  -6   37.70   11.80
  -2   5   6   68.19    9.10
  -2  -5   6   58.89    6.00
   2  -5  -6   56.59    6.90
  -2  -5   6   61.29    8.30
   2   5  -5  446.26   30.50
  -2   5   5  445.66   22.30
  -2   5   5  456.25   31.10
   2  -5  -5  439.36   20.80
  -2  -5   5  480.45   19.90
  -2  -5   5  449.86   21.80
   2   5  -4   12.30    8.80
  -2   5   4   21.00    6.30
  -2   5   4   31.10   11.10
   2  -5  -4   23.00    4.10
  -2  -5   4   11.60    2.90
  -2  -5   4   13.40    5.00
  -2   5   3  291.07   27.50
  -2   5   3  299.37   16.70
   2   5  -3  337.17   25.10
   2  -5  -3  290.27   14.10
  -2  -5   3  283.07   16.00
  -2  -5   3  300.97   13.80
   2   5  -2 1072.99   46.20
  -2   5   2 1091.69   43.60
  -2   5   2 1042.10   55.29
   2   5  -2 1121.99   54.59
   2  -5  -2 1076.89   42.40
  -2  -5   2 1163.88   43.80
  -2  -5   2 1184.88   42.60
  -2   5   1  108.49   10.50
   2   5  -1   91.69   11.80
   2   5  -1   93.09   15.50
  -2   5   1  125.49   18.30
  -2  -5   1   95.59   10.00
   2  -5  -1  106.39    6.90
  -2  -5   1   84.09    6.30
  -2  -5   1   85.79    6.60
  -2   5   0  917.31   37.40
   2   5   0  917.81   47.60
  -2   5   0  927.31   48.80
   2   5   0  911.21   39.90
   2  -5   0  923.81   37.90
  -2  -5   0  974.50   38.00
   2  -5   0  926.91   35.70
  -2  -5   0  933.01   36.10
  -2   5  -1  192.08   21.30
   2   5   1  246.78   24.30
  -2   5  -1  178.18   13.00
   2   5   1  221.68   15.70
  -2  -5  -1  212.18    9.30
  -2  -5  -1  201.88   10.60
   2  -5   1  186.78   13.20
   2  -5   1  198.18   10.10
   2   5   2  541.25   32.00
  -2   5  -2  444.46   22.30
   2   5   2  480.75   24.30
  -2   5  -2  405.36   29.70
  -2  -5  -2  475.75   18.10
  -2  -5  -2  483.75   20.20
   2  -5   2  461.75   21.80
   2  -5   2  454.95   19.30
  -2   5  -3 2457.85  103.09
   2   5   3 2597.24  102.29
  -2   5  -3 2381.16   89.09
   2   5   3 2471.75   91.09
  -2  -5  -3 2439.06   90.99
   2  -5   3 2536.65   90.19
   2  -5   3 2521.25   88.59
  -2   5  -4  449.66   30.20
   2   5   4  452.45   28.70
   2   5   4  480.75   24.50
  -2   5  -4  483.45   22.80
  -2  -5  -4  446.76   20.30
  -2  -5  -4  442.86   18.80
   2  -5   4  486.95   21.70
  -2   5  -5  145.09   13.00
  -2   5  -5  145.19   19.20
   2   5   5  142.39   14.30
   2  -5   5  139.29   11.10
  -2  -5  -5  166.28    9.30
  -2  -5  -5  165.58   10.30
  -2   5  -6  111.19   16.50
   2   5   6  147.89   14.40
  -2   5  -6  135.09   13.40
   2  -5   6  154.78   11.00
  -2  -5  -6  149.69   10.40
  -2  -5  -6  142.49    8.70
   2   5   7  307.37   19.90
  -2   5  -7  295.47   19.10
  -2   5  -7  297.47   25.40
   2  -5   7  306.07   17.20
  -2  -5  -7  352.16   17.70
  -2  -5  -7  323.37   14.50
   2   5   8 1296.07   52.19
  -2   5  -8 1212.28   62.19
  -2   5  -8 1293.47   51.49
   2  -5   8 1289.97   49.80
  -2  -5  -8 1306.27   45.20
  -2  -5  -8 1218.68   51.89
  -2   5  -9  532.55   27.40
   2   5   9  565.04   28.10
  -2   5  -9  510.45   35.80
   2  -5   9  527.15   25.30
  -2  -5  -9  526.05   27.10
  -2   5 -10  262.37   29.60
   2   5  10  258.57   19.60
  -2   5 -10  258.67   18.90
  -2  -5 -10  269.87   18.80
   2  -5  10  281.17   17.40
  -2   5 -11  403.86   37.30
  -2   5 -11  360.66   22.60
   2   5  11  328.77   22.40
  -2  -5 -11  328.27   22.80
   2  -5  11  359.46   20.70
  -2   5 -12    8.20   12.90
   2   5  12   11.00    9.40
  -2   5 -12  -12.80    8.50
  -2  -5 -12   -2.80    7.60
   2  -5  12   -6.60    6.30
   2   5  13   41.40   12.40
  -2   5 -13   64.29   19.10
   2  -5  13   33.90    9.30
  -2  -5 -13   33.70   11.40
  -2   5 -14   -7.80   14.60
   2   5  14   -8.70    9.90
  -2  -5 -14   -6.30    9.80
   2  -5  14   15.40    9.20
  -2   5 -15  151.58   29.50
   2   5  15  161.68   19.50
   2  -5  15  122.89   16.10
   2   5  16  393.66   28.10
   2  -5  16  386.56   26.60
   2   5  17   40.10   15.20
   2  -5  17   16.90   11.90
  -2   6  16   50.29   14.10
  -2  -6  16   64.29   14.50
  -2   6  15   50.19   13.20
  -2  -6  15   56.69   13.30
  -2   6  14   69.09   13.20
  -2  -6  14   49.50   12.50
  -2   6  13   12.10    9.60
  -2  -6  13    4.90    9.00
  -2   6  12   13.50    9.60
  -2  -6  12    8.70    8.00
  -2   6  11  131.89   15.20
  -2  -6  11  144.89   15.60
  -2   6  10   17.60    9.00
  -2  -6  10   19.90    7.60
  -2   6   9  140.29   14.70
  -2  -6   9  149.99   14.90
   2   6  -8  169.78   23.70
  -2   6   8  122.49   13.60
  -2  -6   8  132.69   13.50
   2   6  -7  332.47   31.90
  -2   6   7  342.97   20.50
  -2  -6   7  341.57   20.10
  -2   6   6  714.83   43.30
   2   6  -6  682.63   43.60
  -2   6   6  726.63   32.90
  -2  -6   6  775.32   32.90
   2  -6  -6  699.13   31.40
  -2   6   5  189.58   23.30
  -2   6   5  188.78   14.70
   2   6  -5  163.28   21.60
  -2  -6   5  196.58   11.00
  -2  -6   5  183.38   14.30
   2  -6  -5  204.58   12.30
  -2   6   4    4.20    6.20
  -2   6   4   17.50   11.30
   2   6  -4   11.30    7.60
   2   6  -4   19.20   10.50
  -2  -6   4   11.70    3.20
  -2  -6   4    9.40    5.70
   2  -6  -4   10.10    3.70
  -2   6   3   87.79   17.90
   2   6  -3  111.79   18.60
  -2   6   3   95.89   11.50
   2   6  -3  109.89   14.20
   2  -6  -3  105.99    8.20
  -2  -6   3  111.79   11.40
  -2  -6   3  111.89    7.70
   2   6  -2   51.59   14.20
   2   6  -2   38.00    9.90
  -2   6   2   51.69    8.50
  -2   6   2   50.09   15.50
   2  -6  -2   38.30    5.20
  -2  -6   2   47.90    8.50
  -2  -6   2   71.29    6.50
  -2  -6   2   65.19    6.60
   2   6  -1 1656.23   79.79
   2   6  -1 1687.23   68.89
  -2   6   1 1715.53   81.59
  -2   6   1 1803.02   66.49
  -2  -6   1 1864.61   66.99
   2  -6  -1 1748.43   65.49
  -2  -6   1 1761.32   65.79
   2   6   0   48.30   13.80
  -2   6   0   57.99   14.40
  -2   6   0   52.49    8.80
   2   6   0   37.50    9.10
  -2  -6   0   29.40    4.70
   2  -6   0   49.80    8.90
   2  -6   0   53.99    5.50
  -2   6  -1  621.14   27.90
   2   6   1  582.84   37.90
  -2   6  -1  562.64   38.30
   2   6   1  557.74   29.20
  -2  -6  -1  600.24   22.80
  -2  -6  -1  561.44   24.70
   2  -6   1  594.44   28.00
   2   6   2  343.37   29.10
   2   6   2  429.96   24.10
  -2   6  -2  410.46   21.40
  -2   6  -2  409.06   31.50
  -2  -6  -2  389.36   18.30
   2  -6   2  384.56   20.80
  -2   6  -3  174.28   14.20
   2   6   3  215.48   16.30
  -2   6  -3  174.18   22.40
  -2  -6  -3  204.48   11.50
   2  -6   3  172.88   13.60
   2   6   4  319.97   20.90
  -2   6  -4  386.86   20.90
  -2   6  -4  344.47   28.70
  -2  -6  -4  337.37   17.20
   2  -6   4  347.07   19.40
  -2  -6  -4  379.46   16.40
   2   6   5 1219.98   50.09
  -2   6  -5 1175.68   60.49
  -2   6  -5 1134.99   47.60
   2  -6   5 1263.87   47.60
  -2  -6  -5 1149.19   42.70
  -2  -6  -5 1160.28   46.90
   2   6   6   24.10    8.20
  -2   6  -6   17.50    7.90
  -2   6  -6   13.70   10.70
  -2  -6  -6    9.50    4.40
  -2  -6  -6   10.60    4.70
   2  -6   6   11.00    5.90
  -2   6  -7 1115.09   59.19
   2   6   7 1091.29   47.70
  -2   6  -7 1119.59   46.40
  -2  -6  -7 1140.79   40.60
   2  -6   7 1115.49   45.50
  -2  -6  -7 1088.69   46.00
  -2   6  -8   31.80   14.10
   2   6   8   38.60    9.70
  -2   6  -8   41.10    9.70
  -2  -6  -8   17.80    6.40
   2  -6   8   50.49    8.70
  -2   6  -9   84.39   12.70
  -2   6  -9  103.19   19.50
   2   6   9   80.09   13.00
  -2  -6  -9   83.59   11.20
   2  -6   9   86.09   11.70
  -2   6 -10   25.40   10.20
  -2   6 -10   45.70   16.20
   2   6  10   48.20   11.90
   2  -6  10   37.20    9.20
  -2  -6 -10   40.30    9.40
  -2   6 -11  563.04   43.40
   2   6  11  555.14   31.90
  -2   6 -11  620.44   30.60
   2  -6  11  659.93   30.40
  -2  -6 -11  493.15   30.90
  -2   6 -12  337.77   38.60
   2   6  12  372.16   25.30
  -2  -6 -12  341.27   25.30
   2  -6  12  368.76   23.10
   2   6  13  367.86   26.00
  -2   6 -13  334.47   40.20
   2  -6  13  370.56   24.00
   2   6  14   -7.20   11.30
  -2   6 -14   -4.60   16.70
   2  -6  14    8.20    9.60
   2   6  15   42.10   13.60
   2  -6  15   19.50   11.00
   2   6  16   38.80   16.00
   2  -6  16   47.10   13.70
   2   7 -15  146.59   23.70
  -2   7  15  113.89   17.50
  -2  -7  15  123.29   18.10
  -2   7  14   70.59   15.00
  -2  -7  14  109.59   16.80
  -2   7  13    9.30   10.70
  -2  -7  13    8.50   10.20
  -2   7  12   12.60   10.10
  -2  -7  12    0.40    8.10
  -2   7  11    6.10    9.20
  -2  -7  11    1.90    8.10
  -2   7  10  255.87   19.70
  -2  -7  10  259.47   19.90
  -2   7   9   90.99   13.30
  -2  -7   9  119.39   14.40
  -2   7   8   -6.30    7.30
  -2  -7   8    2.80    7.20
   2   7  -7   64.59   14.10
  -2   7   7   65.89   11.20
  -2  -7   7   73.09   11.50
   2   7  -6   93.69   15.20
  -2   7   6   78.99   11.90
  -2  -7   6   77.89   11.60
  -2   7   5  608.94   30.50
   2   7  -5  634.04   34.90
  -2  -7   5  672.63   31.50
  -2   7   4   20.50    8.10
  -2   7   4   10.20   12.70
   2   7  -4   22.20    9.90
  -2  -7   4   20.20    7.50
  -2   7   3  787.32   36.60
   2   7  -3  787.92   39.70
  -2   7   3  830.12   50.99
  -2  -7   3  852.41   33.70
  -2  -7   3  840.22   37.40
  -2  -7   3  813.72   33.80
  -2   7   2  370.66   21.60
  -2   7   2  393.16   38.50
   2   7  -2  359.36   24.50
  -2  -7   2  420.86   22.70
  -2  -7   2  394.36   18.60
  -2   7   1   17.10    7.70
   2   7  -1   22.00    8.80
  -2   7   1   38.80   15.10
  -2  -7   1   19.10    4.40
  -2  -7   1   18.70    7.20
   2   7   0  233.18   20.90
  -2   7   0  233.08   17.00
  -2   7   0  286.17   32.50
  -2  -7   0  251.37   13.60
   2  -7   0  255.97   18.50
  -2   7  -1  649.93   43.80
  -2   7  -1  658.53   30.60
   2   7   1  569.94   31.80
   2  -7   1  661.83   31.10
  -2  -7  -1  615.34   27.00
  -2   7  -2    0.40   10.70
   2   7   2    2.20    7.50
  -2   7  -2   -7.90    6.20
  -2  -7  -2    1.80    3.20
   2  -7   2    6.90    6.90
   2   7   3 1531.65   64.09
  -2   7  -3 1610.74   61.89
  -2   7  -3 1561.24   78.39
   2  -7   3 1582.94   62.19
  -2  -7  -3 1573.64   60.79
   2   7   4   -7.10    7.90
  -2   7  -4   -0.80    7.50
  -2   7  -4   -4.80   10.50
  -2  -7  -4    1.10    3.50
   2  -7   4    3.60    6.00
  -2  -7  -4    4.50    4.40
   2   7   5   43.80   11.00
  -2   7  -5   35.40   15.10
  -2   7  -5   52.49   10.20
  -2  -7  -5   56.89    7.10
  -2  -7  -5   53.29    7.30
   2  -7   5   42.70    8.90
  -2   7  -6  185.98   26.20
  -2   7  -6  200.08   17.50
   2   7   6  190.18   18.90
  -2  -7  -6  198.18   11.90
   2  -7   6  194.28   17.00
  -2  -7  -6  182.48   13.20
  -2   7  -7  400.56   24.10
  -2   7  -7  385.46   39.60
   2   7   7  441.96   26.80
  -2  -7  -7  428.86   22.50
   2  -7   7  413.06   23.40
  -2  -7  -7  438.66   19.50
  -2   7  -8   99.09   13.60
   2   7   8   87.39   14.40
  -2   7  -8   98.19   20.40
  -2  -7  -8   91.99   11.20
   2  -7   8   82.79   12.30
  -2   7  -9  806.02   53.09
  -2   7  -9  824.42   38.10
   2   7   9  755.42   39.50
  -2  -7  -9  841.12   38.90
   2  -7   9  850.71   38.20
   2   7  10    1.90    9.10
  -2   7 -10    3.00   13.80
  -2   7 -10   11.60    9.60
  -2  -7 -10    3.50    6.60
   2  -7  10   -5.70    7.20
  -2   7 -11  372.16   41.40
   2   7  11  429.96   28.40
   2  -7  11  467.45   27.10
  -2   7 -12   15.70   17.40
   2   7  12   42.70   13.30
   2  -7  12   45.40   11.20
   2   7  13  172.58   20.30
   2  -7  13  160.78   18.90
   2   7  14   13.30   12.80
   2  -7  14   18.00   11.90
   2   7  15  234.58   24.40
   2  -7  15  265.57   25.10
  -2   8  14   85.49   16.50
   2   8 -14  125.39   22.70
  -2  -8  14   78.79   16.50
  -2   8  13   17.40   12.30
   2   8 -13   35.30   17.70
  -2  -8  13   27.40   12.00
   2   8 -12    2.50   15.20
  -2   8  12    8.20   10.00
  -2  -8  12   13.40   10.60
  -2   8  11  417.56   27.90
   2   8 -11  575.34   36.90
  -2  -8  11  510.35   30.40
   2   8 -10  144.89   21.80
  -2   8  10   92.09   14.80
  -2  -8  10  135.69   17.00
  -2   8   9    8.80    9.20
   2   8  -9    1.70   11.60
  -2  -8   9    0.00    8.50
   2   8  -8   16.70   12.40
  -2   8   8    9.40    8.80
  -2  -8   8   16.50    9.00
  -2   8   7   48.90   11.50
   2   8  -7   83.19   16.80
  -2  -8   7   79.39   12.70
  -2   8   6  199.88   18.20
   2   8  -6  217.58   23.10
  -2  -8   6  205.98   19.10
   2   8  -5  212.68   22.80
  -2   8   5  211.88   18.70
  -2  -8   5  215.08   19.10
   2   8  -4   16.60   10.20
  -2   8   4   11.10    7.80
  -2  -8   4    0.80    7.20
   2   8  -3    9.20    9.40
  -2   8   3    6.50    8.20
  -2  -8   3    9.40    8.10
  -2   8   2  225.38   31.40
  -2   8   2  201.48   18.10
   2   8  -2  203.48   20.90
  -2  -8   2  197.68   18.40
  -2   8   1  779.72   35.90
   2   8  -1  770.32   38.70
  -2   8   1  698.73   50.79
  -2   8   0  115.59   14.10
  -2   8   0  123.29   24.60
   2   8   0  120.89   16.10
  -2   8  -1  440.96   44.20
  -2   8  -1  428.86   24.60
   2   8   1  401.56   26.50
  -2  -8  -1  452.65   21.30
   2  -8   1  413.66   25.90
   2   8   2  335.17   23.60
  -2   8  -2  276.37   34.70
  -2   8  -2  319.97   21.30
   2  -8   2  348.57   22.30
  -2  -8  -2  356.56   18.10
  -2   8  -3   -7.00   12.40
   2   8   3   -2.40    8.20
  -2   8  -3    0.30    7.60
   2  -8   3   -3.20    7.30
  -2  -8  -3    6.70    4.20
  -2   8  -4   11.20   14.10
   2   8   4   -2.70    9.10
  -2   8  -4  -12.30    7.50
   2  -8   4    4.80    7.20
  -2  -8  -4    1.90    4.00
  -2  -8  -4   -4.90    4.60
   2   8   5  450.45   28.40
  -2   8  -5  450.15   26.10
  -2   8  -5  405.36   42.10
  -2  -8  -5  453.25   21.20
   2  -8   5  450.15   26.00
  -2  -8  -5  478.05   23.40
  -2   8  -6   59.29   19.20
  -2   8  -6   53.09   11.50
   2   8   6   53.99   12.70
  -2  -8  -6   64.29    8.50
   2  -8   6   66.29   12.20
  -2  -8  -6   55.89    8.70
  -2   8  -7  993.90   63.49
   2   8   7 1030.80   49.20
  -2   8  -7 1094.79   46.80
   2  -8   7 1031.30   47.10
  -2  -8  -7 1101.59   40.80
  -2   8  -8   92.59   23.20
  -2   8  -8  143.39   16.20
   2   8   8   74.49   14.90
   2  -8   8  108.29   14.90
  -2   8  -9    7.70   15.90
  -2   8  -9    3.70    9.90
   2   8   9    2.80    9.70
   2  -8   9    2.70    8.50
   2   8  10   61.69   14.60
  -2   8 -10   33.50   19.70
   2  -8  10   44.60   12.40
   2   8  11  178.28   21.10
   2  -8  11  180.28   20.00
   2   8  12   13.30   12.30
   2  -8  12    6.10   10.70
   2   8  13  131.69   19.50
   2  -8  13  105.29   17.10
   2   8  14   53.19   16.40
   2  -8  14   44.80   14.00
  -2   9  13   88.49   17.20
   2   9 -13  137.49   23.90
  -2  -9  13   82.89   16.80
   2   9 -12   -4.10   15.80
  -2   9  12  -13.30   10.40
  -2  -9  12   -9.70   10.50
   2   9 -11    9.50   15.40
  -2   9  11   -4.50   10.40
  -2  -9  11    7.20   10.70
  -2   9  10   82.29   14.90
   2   9 -10   68.19   18.40
  -2  -9  10   51.09   13.50
  -2   9   9  330.87   24.40
   2   9  -9  425.06   35.00
  -2  -9   9  305.37   24.60
  -2   9   8   -6.20    9.30
   2   9  -8   13.90   13.70
  -2  -9   8   12.70    9.80
   2   9  -7  531.75   34.40
  -2   9   7  463.95   28.90
  -2  -9   7  535.95   31.00
  -2   9   6  216.98   20.00
   2   9  -6  197.68   23.40
  -2  -9   6  181.78   19.50
  -2   9   5  119.99   15.70
   2   9  -5  122.69   19.10
  -2  -9   5  122.99   16.30
  -2   9   4   78.49   13.90
   2   9  -4   66.39   15.30
  -2  -9   4   72.29   13.40
   2   9  -3  265.57   25.60
  -2   9   3  296.97   21.60
  -2  -9   3  303.67   22.50
   2   9  -2  277.77   25.40
  -2   9   2  285.47   21.00
   2   9  -1  206.88   22.50
  -2   9   1  258.17   20.10
  -2   9   0    6.60    9.10
   2   9   0   14.60   11.20
  -2   9  -1   -9.20    8.10
   2   9   1    7.10    9.50
   2  -9   1   15.30    8.60
   2   9   2  436.06   27.90
  -2   9  -2  353.86   24.00
   2  -9   2  412.76   26.50
  -2   9  -3  652.03   33.50
  -2   9  -3  676.33   51.69
   2   9   3  664.03   36.20
   2  -9   3  625.44   34.90
   2   9   4  279.47   25.00
  -2   9  -4  232.88   35.10
  -2   9  -4  251.47   21.60
  -2  -9  -4  235.28   15.30
   2  -9   4  227.18   21.90
  -2   9  -5   45.20   12.00
  -2   9  -5   26.50   20.80
   2   9   5   56.09   13.40
  -2  -9  -5   36.60    7.80
   2  -9   5   42.10   11.70
  -2   9  -6  247.28   36.00
  -2   9  -6  251.77   21.50
   2   9   6  224.68   23.30
  -2  -9  -6  225.58   15.40
   2  -9   6  218.18   21.40
   2   9   7   88.59   16.10
  -2   9  -7   65.19   13.60
   2  -9   7   80.29   14.00
   2   9   8   36.70   13.40
  -2   9  -8   38.20   12.40
   2  -9   8   42.00   11.80
   2   9   9   94.09   17.20
  -2   9  -9  113.59   16.30
   2  -9   9  110.39   16.80
   2   9  10  101.49   18.30
   2  -9  10  114.69   17.30
   2   9  11  121.99   19.50
   2  -9  11   95.09   17.00
   2   9  12   39.50   15.60
   2  -9  12   39.90   14.20
   2  -9  13   75.89   16.90
   2  10 -12    8.20   18.50
  -2  10  11  341.27   26.70
   2  10 -11  387.96   35.40
  -2 -10  11  372.66   29.30
   2  10 -10  -16.30   14.40
  -2  10  10    7.50   12.40
  -2 -10  10   -8.10   10.50
  -2  10   9    9.80   11.90
   2  10  -9  -14.10   13.30
  -2 -10   9   -6.70   10.60
  -2  10   8   24.10   12.90
   2  10  -8   34.30   16.60
  -2 -10   8   48.10   13.70
   2  10  -7  222.78   25.50
  -2  10   7  159.18   19.30
  -2 -10   7  184.38   21.70
   2  10  -6   46.60   16.50
  -2  10   6   34.40   12.30
  -2 -10   6    2.30    9.80
  -2  10   5  784.32   39.00
   2  10  -5  753.72   42.60
  -2 -10   5  715.53   39.60
   2  10  -4   24.90   14.00
  -2  10   4   46.10   12.60
  -2 -10   4   21.90   10.90
  -2  10   3  229.48   22.20
   2  10  -3  296.67   27.90
   2  10  -2   67.29   15.70
  -2  10   2   81.29   14.40
  -2  10   1  404.66   26.30
   2  10  -1  362.86   27.40
   2  10   0  169.28   21.70
  -2  10   0  157.88   18.50
  -2  10  -1  114.59   16.00
   2  10   1  110.89   17.70
   2  10   2   47.40   14.50
  -2  10  -2   53.99   13.10
   2 -10   2   11.00    9.90
   2  10   3   11.00   12.70
  -2  10  -3    4.00    9.50
   2 -10   3   14.50   10.60
  -2 -10  -3    6.10    6.40
   2  10   4    3.40   11.20
  -2  10  -4   20.30   11.30
  -2 -10  -4    9.50    6.50
   2 -10   4   -6.70    9.40
   2  10   5   -0.60   11.30
  -2  10  -5   -7.00   10.20
  -2 -10  -5   16.10    7.80
   2 -10   5    3.10   10.20
  -2  10  -6  203.48   20.20
   2  10   6  182.18   22.50
  -2 -10  -6  145.19   14.20
   2 -10   6  194.38   22.10
   2  10   7  118.09   19.60
  -2  10  -7  149.88   18.20
   2 -10   7  162.78   20.60
   2  10   8   71.19   16.80
   2 -10   8   20.50   12.20
   2  10   9   32.50   15.40
   2 -10   9   55.89   15.00
   2  10  10   70.09   17.40
   2 -10  10   74.19   16.40
   2  10  11  137.39   21.80
   2 -10  11  151.38   21.30
   2  11  -9  328.97   32.70
  -2  11   9  273.87   26.10
  -2 -11   9  294.67   29.50
  -2  11   8  199.18   22.30
   2  11  -8  207.38   27.50
  -2 -11   8  179.18   23.10
   2  11  -7  294.67   30.60
  -2  11   7  304.67   26.80
  -2 -11   7  378.16   28.50
  -2  11   6   27.70   13.20
   2  11  -6   48.40   16.70
  -2 -11   6   21.20   12.50
   2  11  -5   59.59   18.10
  -2  11   5   56.89   14.80
  -2 -11   5   59.69   14.70
   2  11  -4  155.98   22.70
  -2  11   4  101.49   16.80
   2  11  -3  169.88   23.10
  -2  11   3  156.38   19.20
  -2  11   2   42.80   13.60
   2  11  -2   53.89   16.20
   2  11  -1  262.17   27.50
  -2  11   1  214.78   22.10
   2  11   0  156.28   22.40
  -2  11   0  151.18   18.70
  -2  11  -1   39.50   13.40
   2  11   1   42.50   15.10
  -2  11  -2   25.20   11.80
   2  11   2    6.60   12.30
  -2 -11  -2   16.80    8.00
   2  11   3  247.38   26.00
  -2  11  -3  267.77   23.80
  -2 -11  -3  205.18   17.80
   2  11   4   27.90   14.70
  -2  11  -4   32.70   12.60
  -2 -11  -4   25.50    8.60
   2 -11   4   10.10   12.40
   2  11   5    0.90   13.00
  -2  11  -5   24.50   12.50
  -2 -11  -5   13.90    8.30
   2 -11   5   12.10   11.60
  -2  11  -6   24.60   12.90
   2  11   6   17.70   14.40
   2 -11   6    6.50   12.30
   2  11   7   33.20   15.70
   2 -11   7   22.00   13.90
   2  11   8   -0.10   13.80
   2 -11   8  -15.80   11.70
   2 -11   9   25.10   14.90
  -2  12   6   66.49   16.70
   2  12  -6   54.49   19.00
   2  12  -5  150.18   23.40
  -2  12   5  116.29   18.60
   2  12  -4  238.48   28.10
  -2  12   4  247.78   24.30
  -2  12   3   81.09   16.60
   2  12  -3   91.49   19.70
   2  12  -2   15.30   15.70
  -2  12   2   14.50   13.40
   2  12  -1  103.59   20.20
  -2  12   1   97.49   18.00
  -2  12   0   78.89   16.60
   2  12   0   97.19   20.20
  -2 -12   0   92.79   13.70
   2  12   1   87.79   19.50
  -2  12  -1   71.59   15.90
  -2 -12  -1   62.79   12.00
  -2  12  -2   31.20   13.70
   2  12   2    2.20   14.20
  -2 -12  -2    6.20    8.80
   2  12   3    7.10   14.10
  -2  12  -3   -7.00   11.50
  -2 -12  -3   21.10    9.50
   2  12   4   33.70   16.60
  -2  12  -4   32.10   14.20
  -2 -12  -4   18.40    9.50
   2  12   5   -0.70   14.90
   2 -12   5    0.10   12.90
  -3   0  18   99.99   15.30
  -3   0  17    2.30    9.50
  -3   0  16   19.50    9.60
  -3   0  15    3.00    7.30
  -3   0  14  283.77   18.60
  -3   0  13   -1.40    5.30
   3   0 -12  228.38   22.90
  -3   0  12  291.97   16.50
   3   0 -11   -5.30    5.50
  -3   0  11   -5.60    4.60
   3   0 -10  109.39   13.80
  -3   0  10  113.49   10.20
   3   0  -9    2.30    4.90
  -3   0   9   -0.90    3.70
  -3   0   9   -0.50    3.20
  -3   0   8 1102.79   45.20
  -3   0   8 1198.38   42.70
   3   0  -8 1102.69   48.60
  -3   0   7    1.90    3.20
  -3   0   7    2.00    1.90
   3   0  -7   -4.40    3.60
  -3   0   7    0.00    2.70
  -3   0   6   20.80    2.50
   3   0  -6   26.00    5.60
  -3   0   6   17.50    3.90
  -3   0   6   23.70    4.40
   3   0  -5   -0.40    3.10
  -3   0   5    1.00    2.40
  -3   0   5    3.30    2.80
  -3   0   5    0.60    2.00
  -3   0   4 8308.27  271.67
  -3   0   4 8262.17  263.67
   3   0  -4 8072.29  290.07
  -3   0   4 7885.11  288.77
  -3   0   3   -1.00    1.90
  -3   0   3   -2.40    2.50
  -3   0   3   -0.30    2.10
  -3   0   3    0.40    2.40
   3   0  -3   -1.60    2.50
   3   0  -2 4247.27  149.39
  -3   0   2 4158.58  139.29
  -3   0   2 4085.69  136.09
  -3   0   2 4309.27  149.19
  -3   0   2 4118.29  148.69
  -3   0   2 4101.39  149.29
  -3   0   1   -0.20    2.20
  -3   0   1   -0.20    1.90
  -3   0   1    0.90    2.20
  -3   0   1    3.50    2.70
  -3   0   0   14.00    3.80
  -3   0   0   15.40    3.60
  -3   0  -1    3.90    3.20
  -3   0  -1   -5.00    2.90
  -3   0  -2 1366.26   48.00
  -3   0  -2 1349.77   46.60
  -3   0  -2 1352.86   50.79
   3   0   3   -2.80    1.80
  -3   0  -3   -3.00    1.30
  -3   0  -3    2.70    3.50
  -3   0  -3    1.00    1.50
  -3   0  -4 9999.00  343.77
   3   0   4 9598.24  324.47
  -3   0  -4 9616.34  343.87
   3   0   5   -4.50    2.50
  -3   0  -5   -0.70    2.30
  -3   0  -5    0.20    2.30
   3   0   6  130.19    8.20
  -3   0  -6  141.19    9.50
  -3   0  -6  131.79    9.40
   3   0   7   -2.80    3.10
  -3   0  -7   -2.90    3.00
  -3   0  -7    4.60    4.00
  -3   0  -8  552.04   27.10
  -3   0  -8  555.94   26.70
   3   0   8  587.34   23.70
  -3   0  -9   -3.70    4.70
   3   0   9    1.10    3.90
   3   0  10  675.33   28.50
  -3   0 -10  666.63   34.00
   3   0  11   -4.50    4.80
  -3   0 -11    1.60    7.00
   3   0  12  503.15   23.80
  -3   0 -12  417.76   29.00
   3   0  13    4.40    7.00
  -3   0 -13   -5.60    8.00
  -3   0 -14  455.75   33.80
   3   0  14  493.05   25.80
  -3   0 -15    1.50   11.30
   3   0  15    8.30    8.80
  -3   0 -16  107.29   21.60
   3   0  16  125.19   15.80
   3   0  17   10.40   10.50
  -3   0 -17   14.30   16.10
   3   0  18   -5.90   10.90
  -3   1  18  186.18   19.20
  -3  -1  18  145.59   17.80
  -3   1  17   -6.10    8.20
  -3  -1  17   -8.20    9.20
  -3   1  16   21.50    9.30
  -3  -1  16   15.20    9.20
  -3   1  15   25.80    9.20
  -3  -1  15   39.40   10.00
  -3   1  14    4.20    6.90
  -3  -1  14    4.20    7.10
  -3   1  13    8.90    6.60
  -3  -1  13    7.70    6.00
   3   1 -12  380.66   28.20
  -3   1  12  407.86   21.00
  -3  -1  12  412.56   21.00
  -3   1  11  153.68   12.60
   3   1 -11  155.08   18.20
  -3  -1  11  196.88   13.00
   3  -1 -11  159.48   17.70
   3   1 -10  455.85   28.30
  -3   1  10  462.65   22.00
   3  -1 -10  485.45   27.00
  -3  -1  10  485.85   22.10
  -3   1   9  154.48   12.00
  -3   1   9  148.29   10.50
   3   1  -9  173.78   17.30
   3  -1  -9  146.69   14.60
  -3  -1   9  167.48   10.80
  -3  -1   9  179.88    7.60
  -3  -1   9  166.08   11.20
   3   1  -8 2098.49   85.09
  -3   1   8 2227.48   81.79
  -3   1   8 2114.59   75.59
  -3  -1   8 2098.79   75.39
  -3  -1   8 2177.78   79.59
   3  -1  -8 2110.79   82.89
  -3  -1   8 2097.39   70.39
  -3   1   7  459.65   21.10
   3   1  -7  405.86   22.90
  -3   1   7  414.16   18.00
  -3  -1   7  408.96   18.60
  -3  -1   7  382.56   15.10
   3  -1  -7  444.86   21.50
  -3  -1   7  404.46   17.80
  -3   1   6  697.83   27.00
   3   1  -6  693.63   32.50
  -3   1   6  685.73   30.50
  -3  -1   6  711.13   24.50
  -3  -1   6  674.93   26.80
  -3  -1   6  735.03   28.60
   3  -1  -6  708.13   30.50
   3   1  -5  334.37   18.60
  -3   1   5  334.27   17.40
  -3   1   5  333.67   14.40
  -3  -1   5  320.27   12.70
   3  -1  -5  340.87   16.70
  -3  -1   5  333.07   15.00
  -3  -1   5  346.17   14.50
   3   1  -4  342.57   18.70
  -3   1   4  369.26   18.30
  -3   1   4  368.16   14.90
   3  -1  -4  371.16   16.90
  -3  -1   4  365.06   14.70
  -3  -1   4  351.86   13.60
  -3  -1   4  368.76   15.60
  -3   1   3 1448.85   57.39
  -3   1   3 1442.86   51.49
   3   1  -3 1508.15   57.99
  -3   1   3 1501.55   55.19
  -3   1   3 1463.95   54.79
  -3  -1   3 1621.04   57.99
   3  -1  -3 1476.75   55.59
  -3  -1   3 1471.35   49.90
  -3  -1   3 1518.15   51.79
  -3  -1   3 1516.35   54.69
  -3   1   2  211.98    9.40
   3   1  -2  178.18   11.80
  -3   1   2  201.88   12.40
  -3   1   2  198.18    8.20
  -3   1   2  187.98    9.00
  -3  -1   2  180.38    8.60
  -3  -1   2  183.18    8.60
   3  -1  -2  223.28    9.80
  -3  -1   2  188.08    8.30
  -3  -1   2  195.88   12.10
  -3   1   1  804.32   28.00
  -3   1   1  767.42   33.60
  -3   1   1  883.41   30.50
  -3   1   1  826.02   28.50
  -3   1   1  812.62   31.60
  -3  -1   1  829.22   30.10
  -3  -1   1  830.72   28.50
  -3  -1   1  832.82   33.50
  -3  -1   1  836.62   31.10
  -3  -1   1  806.12   28.80
  -3   1   0 9596.84  339.67
  -3   1   0 9748.22  335.27
  -3   1   0 9209.88  337.47
  -3  -1   0 9315.37  335.17
  -3  -1   0 9425.46  338.37
  -3  -1   0 9924.71  339.57
   3  -1   0 9281.77  316.37
  -3  -1   0 9740.12  309.27
  -3   1  -1  416.06   17.90
  -3   1  -1  418.86   16.80
  -3   1  -1  430.86   15.40
  -3  -1  -1  437.16   19.20
  -3  -1  -1  427.66   16.00
  -3  -1  -1  426.36   15.60
  -3  -1  -1  408.36   17.50
  -3   1  -2  605.94   21.90
  -3   1  -2  586.54   23.20
  -3   1  -2  617.24   24.90
  -3  -1  -2  607.24   24.50
  -3  -1  -2  592.94   21.90
  -3  -1  -2  635.44   24.20
  -3  -1  -2  598.44   22.10
   3  -1   2  594.64   20.60
  -3   1  -3   92.49    6.70
   3   1   3  105.49    6.80
  -3   1  -3  108.69    5.10
  -3  -1  -3  101.59    7.60
   3  -1   3  104.39    5.00
  -3  -1  -3  102.59    5.30
  -3  -1  -3  109.49    6.80
  -3  -1  -3  112.99    8.00
  -3   1  -4 1232.18   43.90
   3   1   4 1154.08   42.90
  -3   1  -4 1154.18   45.70
   3  -1   4 1198.98   41.60
  -3  -1  -4 1230.48   42.00
  -3  -1  -4 1193.58   46.30
  -3  -1  -4 1228.98   44.30
  -3   1  -5   89.39    5.80
   3   1   5   96.99    7.20
  -3   1  -5   82.29    4.70
  -3   1  -5   92.29    8.40
  -3  -1  -5   90.89    6.50
   3  -1   5   87.69    6.00
  -3  -1  -5   92.69    7.30
  -3  -1  -5   97.19    8.60
  -3   1  -6 1336.17   50.69
  -3   1  -6 1349.96   53.29
   3   1   6 1377.86   49.10
  -3  -1  -6 1334.77   51.49
  -3  -1  -6 1338.97   47.40
  -3  -1  -6 1399.96   53.79
   3  -1   6 1313.17   47.70
  -3   1  -7  141.29   11.60
   3   1   7  126.39    9.70
  -3   1  -7  135.99    9.30
  -3  -1  -7  175.08   12.90
  -3  -1  -7  145.59   10.30
   3  -1   7  130.59    8.40
  -3   1  -8 2377.86   92.49
  -3   1  -8 2524.75   89.69
   3   1   8 2389.56   84.39
  -3  -1  -8 2272.07   90.29
  -3  -1  -8 2401.06   92.49
   3  -1   8 2346.17   83.29
   3   1   9   23.70    6.10
  -3   1  -9   21.00    7.00
  -3  -1  -9   24.30    6.50
   3  -1   9   29.20    5.70
  -3   1 -10  330.87   22.50
   3   1  10  354.46   18.20
  -3  -1 -10  338.07   21.30
   3  -1  10  317.77   16.80
  -3   1 -11   13.20    8.20
   3   1  11   27.70    7.40
  -3  -1 -11   24.20    8.30
   3  -1  11   21.80    6.10
   3   1  12  351.06   19.90
  -3   1 -12  311.37   25.10
  -3  -1 -12  332.67   24.50
   3  -1  12  343.27   18.80
   3   1  13   29.90    8.50
  -3   1 -13   21.40   11.10
   3  -1  13   16.40    7.40
  -3  -1 -13   13.10    9.80
   3   1  14   61.19   11.40
  -3   1 -14   46.00   14.50
   3  -1  14   51.59   10.10
  -3  -1 -14   39.10   13.70
   3   1  15   21.30   10.10
  -3   1 -15   14.20   13.00
  -3  -1 -15   -4.30   11.10
   3  -1  15   -0.20    8.00
  -3   1 -16   11.20   15.40
   3   1  16   27.90   10.40
   3  -1  16    2.60    9.10
  -3  -1 -16    7.00   13.50
   3   1  17    3.90   11.00
  -3   1 -17  -13.50   15.50
   3  -1  17    5.80   10.70
  -3  -1 -17    1.00   15.70
   3   1  18  154.68   19.50
   3  -1  18  183.28   19.40
  -3   2  18   36.80   12.70
  -3  -2  18   35.20   12.60
  -3   2  17    3.10    9.80
  -3  -2  17    2.00    9.30
  -3   2  16   71.69   12.80
  -3  -2  16   84.99   13.20
  -3   2  15   -8.50    7.50
  -3  -2  15   10.40    8.10
  -3   2  14  601.64   29.90
  -3  -2  14  620.64   30.10
  -3   2  13    1.20    6.30
  -3  -2  13   10.30    7.30
  -3   2  12  102.29   11.40
  -3  -2  12   91.19   10.90
  -3   2  11  105.59   11.00
   3   2 -11   76.09   14.50
   3  -2 -11  103.49   13.40
  -3  -2  11   88.29   10.10
  -3   2  10   99.19   10.10
   3   2 -10   90.49   14.20
  -3  -2  10   89.89    9.70
   3  -2 -10  115.39   12.90
  -3  -2  10  106.89    6.50
   3   2  -9  224.18   19.20
  -3   2   9  232.58   16.10
  -3   2   9  218.38   13.40
   3  -2  -9  226.08   16.10
  -3  -2   9  250.07   13.00
  -3  -2   9  232.58   10.40
  -3  -2   9  217.48   13.40
  -3   2   8 1041.60   40.50
  -3   2   8 1076.89   45.70
   3   2  -8  995.70   48.30
  -3  -2   8 1085.29   36.80
   3  -2  -8 1103.29   45.10
  -3  -2   8 1060.69   41.60
  -3  -2   8 1038.20   40.30
  -3   2   7   99.99   11.40
   3   2  -7  104.99   12.80
  -3   2   7  101.19    8.90
   3  -2  -7   99.99   10.00
  -3  -2   7  139.99    8.80
  -3  -2   7  132.89    8.20
  -3  -2   7  121.59    6.70
  -3   2   6  356.56   19.90
  -3   2   6  349.87   15.70
   3   2  -6  318.17   20.60
  -3  -2   6  334.37   13.40
  -3  -2   6  339.57   15.40
  -3  -2   6  343.87   15.40
   3  -2  -6  315.27   16.80
  -3   2   5  833.82   37.50
  -3   2   5  815.92   31.70
   3   2  -5  843.92   38.40
  -3  -2   5  828.12   29.60
   3  -2  -5  864.51   34.10
  -3  -2   5  829.82   31.60
  -3  -2   5  870.71   32.70
  -3   2   4 2586.84  100.99
  -3   2   4 2669.73   95.89
  -3   2   4 2672.03   91.19
   3   2  -4 2648.64  101.39
  -3  -2   4 2607.44   87.89
   3  -2  -4 2734.33   96.89
  -3  -2   4 2623.24   91.19
  -3  -2   4 2691.53   95.69
  -3   2   3  697.33   32.80
  -3   2   3  725.03   27.00
  -3   2   3  729.03   26.20
   3   2  -3  668.83   31.90
  -3  -2   3  682.93   25.00
  -3  -2   3  712.23   26.50
  -3  -2   3  683.63   26.90
   3  -2  -3  733.53   27.80
  -3   2   2   74.49    6.00
  -3   2   2   54.19    9.30
   3   2  -2   78.19    9.50
  -3   2   2   79.39    5.00
  -3   2   2   73.79    5.30
  -3  -2   2   62.49    5.50
  -3  -2   2   64.59    4.50
  -3  -2   2   80.79    9.70
   3  -2  -2   79.09    5.30
  -3  -2   2   68.49    5.00
  -3   2   1  651.83   25.20
   3   2  -1  643.04   29.70
  -3   2   1  640.64   23.20
  -3   2   1  594.94   30.40
  -3   2   1  668.03   24.50
  -3  -2   1  660.53   30.10
  -3  -2   1  655.93   24.30
   3  -2  -1  607.34   24.80
  -3  -2   1  635.84   24.20
  -3  -2   1  669.23   23.30
  -3   2   0   27.20    6.90
  -3   2   0   32.00    3.00
  -3   2   0   40.00    4.50
  -3   2   0   34.90    3.00
  -3  -2   0   48.40    4.20
  -3  -2   0   42.60    4.00
   3  -2   0   26.20    3.80
  -3  -2   0   56.29    8.80
  -3  -2   0   40.30    3.10
  -3   2  -1  659.13   25.50
  -3   2  -1  629.14   23.30
  -3   2  -1  620.64   21.40
  -3   2  -1  615.74   27.70
  -3   2  -1  615.54   21.70
  -3  -2  -1  614.84   30.10
  -3  -2  -1  619.94   23.30
  -3  -2  -1  644.34   24.80
  -3  -2  -1  630.94   22.60
   3  -2   1  610.04   22.50
  -3   2  -2  630.54   23.40
   3   2   2  640.04   25.30
  -3   2  -2  636.34   27.40
  -3   2  -2  653.13   21.50
  -3  -2  -2  645.74   24.90
   3  -2   2  638.64   22.60
  -3  -2  -2  604.54   30.00
  -3  -2  -2  608.34   22.80
  -3  -2  -2  611.54   23.70
  -3   2  -3 2440.26   86.99
  -3   2  -3 2376.26   90.69
  -3   2  -3 2454.45   81.39
   3   2   3 2398.66   84.89
   3  -2   3 2377.66   82.39
  -3  -2  -3 2565.74   88.99
  -3  -2  -3 2457.95   87.39
  -3  -2  -3 2389.56   80.99
  -3  -2  -3 2468.05   92.99
  -3   2  -4 4804.42  179.28
  -3   2  -4 5092.89  164.78
   3   2   4 5006.50  168.28
  -3   2  -4 4830.42  165.38
  -3   2  -4 5189.88  175.38
  -3  -2  -4 4859.01  162.08
  -3  -2  -4 4959.10  180.88
   3  -2   4 4812.62  165.78
  -3  -2  -4 4931.51  175.78
  -3   2  -5  938.51   33.70
  -3   2  -5  855.51   37.70
   3   2   5  826.52   34.00
  -3   2  -5  900.01   32.10
   3  -2   5  877.81   32.00
  -3  -2  -5  898.01   31.80
  -3  -2  -5  872.01   39.00
  -3  -2  -5  877.51   34.20
  -3   2  -6  618.74   25.10
  -3   2  -6  579.54   24.10
  -3   2  -6  607.74   29.50
   3   2   6  624.14   26.20
  -3  -2  -6  657.73   24.10
   3  -2   6  626.84   23.90
  -3  -2  -6  650.13   31.00
  -3  -2  -6  636.04   26.10
   3   2   7   45.00    6.80
  -3   2  -7   25.30    4.20
  -3   2  -7   28.60    7.00
  -3  -2  -7   29.00    5.10
   3  -2   7   18.90    4.00
  -3  -2  -7   26.70    5.30
  -3  -2  -7   31.50    8.30
   3   2   8  849.91   34.00
  -3   2  -8  760.92   38.50
  -3  -2  -8  831.42   31.20
   3  -2   8  822.22   31.80
  -3  -2  -8  829.62   35.50
   3   2   9  291.17   16.30
  -3   2  -9  264.67   20.00
   3  -2   9  262.47   14.00
  -3  -2  -9  246.88   16.70
   3   2  10   79.59   10.30
  -3   2 -10   98.09   14.70
   3  -2  10   99.19    9.60
  -3  -2 -10   74.19   10.60
  -3   2 -11  280.97   23.70
   3   2  11  307.57   18.60
   3  -2  11  299.47   16.70
  -3  -2 -11  310.27   21.60
  -3   2 -12  118.79   17.70
   3   2  12  132.39   13.80
   3  -2  12  122.79   12.10
  -3  -2 -12  162.68   17.50
   3   2  13   63.69   11.00
  -3   2 -13   54.09   14.70
   3  -2  13   67.09   10.10
  -3  -2 -13   54.49   12.90
  -3   2 -14  364.96   35.20
   3   2  14  416.86   24.80
  -3  -2 -14  384.36   30.40
   3  -2  14  437.46   23.50
  -3   2 -15    0.20   12.80
   3   2  15    5.60    9.30
   3  -2  15   -5.00    7.50
  -3  -2 -15   -4.30   11.20
   3   2  16   82.99   14.40
  -3   2 -16  101.99   22.30
  -3  -2 -16   47.70   17.20
   3  -2  16   83.59   13.20
  -3   2 -17  -16.20   16.50
   3   2  17    9.30   12.10
  -3  -2 -17   17.10   16.80
   3  -2  17   28.90   11.50
   3   2  18   49.30   14.90
   3  -2  18   38.20   14.40
  -3   3  18  385.66   27.00
  -3  -3  18  386.46   27.30
  -3   3  17   24.70   11.40
  -3  -3  17   -1.60    9.40
  -3   3  16   31.80   11.40
  -3  -3  16   65.59   12.80
  -3   3  15    3.90    8.40
  -3  -3  15    2.90    7.70
  -3   3  14   -1.70    7.80
  -3  -3  14    2.70    6.80
  -3   3  13   96.49   12.20
  -3  -3  13   77.49   11.20
  -3   3  12  307.67   18.80
  -3  -3  12  337.87   19.30
  -3   3  11  125.59   12.40
   3   3 -11   80.49   16.10
  -3  -3  11   95.29   10.90
  -3   3  10 1391.56   54.19
   3   3 -10 1476.55   66.89
   3  -3 -10 1338.77   59.39
  -3  -3  10 1458.65   54.49
  -3  -3  10 1429.06   49.20
  -3   3   9   13.80    5.80
   3   3  -9   20.70    9.20
  -3   3   9   -2.50    5.30
   3  -3  -9   12.00    5.60
  -3  -3   9   16.50    5.70
  -3   3   8  158.28   11.80
  -3   3   8  164.88   16.50
   3   3  -8  123.19   16.30
   3  -3  -8  167.18   12.70
  -3  -3   8  200.38   10.70
  -3  -3   8  185.08   11.70
  -3   3   7  352.56   17.40
  -3   3   7  334.67   22.10
   3   3  -7  320.87   23.30
  -3  -3   7  366.36   16.30
  -3  -3   7  324.77   16.80
   3  -3  -7  362.46   18.40
  -3   3   6  268.07   14.60
   3   3  -6  278.97   20.70
  -3   3   6  300.67   20.50
   3  -3  -6  298.87   15.60
  -3  -3   6  309.77   14.00
  -3  -3   6  304.37   14.80
   3   3  -5  485.65   28.40
  -3   3   5  472.35   28.20
  -3   3   5  510.45   21.90
  -3   3   5  576.74   20.80
  -3  -3   5  523.35   22.00
   3  -3  -5  515.35   22.70
  -3  -3   5  520.65   21.60
  -3   3   4 1067.79   39.30
  -3   3   4 1044.70   47.90
   3   3  -4  993.50   46.90
  -3   3   4 1043.10   39.00
  -3  -3   4 1050.39   39.30
   3  -3  -4 1080.29   40.80
  -3  -3   4 1066.19   39.80
  -3   3   3   48.60    5.60
   3   3  -3   36.90    8.30
  -3   3   3   46.80    4.40
  -3   3   3   39.70    9.20
   3  -3  -3   37.40    4.20
  -3  -3   3   35.90    3.80
  -3  -3   3   36.50    5.10
  -3   3   2  163.78    8.60
  -3   3   2  185.28   18.20
   3   3  -2  190.28   15.60
  -3   3   2  169.08    9.70
  -3  -3   2  178.78   10.10
   3  -3  -2  189.68    9.00
  -3  -3   2  186.18    8.70
  -3   3   1 1238.78   57.19
  -3   3   1 1365.16   49.10
  -3   3   1 1359.76   47.40
  -3   3   1 1302.67   49.50
   3   3  -1 1329.17   56.39
   3  -3  -1 1378.26   48.90
   3  -3  -1 1306.47   49.00
  -3  -3   1 1282.37   48.10
  -3  -3   1 1351.56   48.90
  -3  -3   1 1373.16   46.10
  -3   3   0 1954.00   81.19
  -3   3   0 2087.39   73.39
   3   3   0 1950.70   80.39
  -3   3   0 2174.68   70.39
  -3  -3   0 2097.39   68.49
   3  -3   0 2034.70   71.29
  -3  -3   0 2111.29   82.29
  -3  -3   0 1883.41   73.69
  -3  -3   0 1984.30   73.19
   3   3   1 1701.13   70.09
   3   3   1 1729.63   63.99
  -3   3  -1 1772.92   60.89
  -3   3  -1 1725.23   70.69
  -3   3  -1 1799.92   63.59
  -3   3  -1 1774.12   63.39
  -3  -3  -1 1771.12   64.39
  -3  -3  -1 1723.53   63.49
  -3  -3  -1 1881.11   73.39
  -3  -3  -1 1721.53   59.39
   3  -3   1 1738.63   61.39
  -3  -3  -1 1722.13   63.69
  -3   3  -2   54.29    5.30
  -3   3  -2   58.59    4.20
   3   3   2   70.29    8.30
  -3   3  -2   59.59    9.20
   3  -3   2   57.39    5.40
  -3  -3  -2   58.49    4.60
  -3  -3  -2   65.99    5.50
  -3  -3  -2   73.99   12.20
  -3  -3  -2   62.29    5.20
   3   3   3   68.09    8.50
  -3   3  -3   87.89    5.40
  -3   3  -3   66.89    9.80
  -3   3  -3   83.29    6.70
  -3  -3  -3   87.69   12.90
  -3  -3  -3   80.39    6.10
   3  -3   3   80.49    6.20
  -3  -3  -3   85.59    5.70
  -3  -3  -3   77.69    5.70
  -3   3  -4   49.80    8.60
  -3   3  -4   42.40    4.10
  -3   3  -4   53.69    5.70
   3   3   4   59.09    7.80
  -3  -3  -4   54.09    5.00
   3  -3   4   41.40    4.70
  -3  -3  -4   60.49    5.30
  -3  -3  -4   61.49   11.20
  -3   3  -5 1215.88   52.59
   3   3   5 1188.88   47.00
  -3   3  -5 1312.87   46.30
  -3   3  -5 1192.48   44.50
  -3  -3  -5 1204.18   54.99
  -3  -3  -5 1266.57   43.00
   3  -3   5 1224.78   44.30
  -3  -3  -5 1209.78   46.70
   3   3   6   32.90    6.80
  -3   3  -6   40.60    4.60
  -3   3  -6   24.70    7.60
  -3   3  -6   45.70    6.00
  -3  -3  -6   23.50    4.50
  -3  -3  -6   39.30    5.40
  -3  -3  -6   29.90    9.40
   3  -3   6   32.70    4.70
  -3   3  -7 1040.50   49.90
   3   3   7 1173.28   44.50
  -3   3  -7 1035.60   41.70
  -3  -3  -7 1125.29   44.60
   3  -3   7 1105.19   41.40
  -3  -3  -7 1186.58   40.10
   3   3   8  595.24   27.30
  -3   3  -8  584.94   25.20
  -3   3  -8  528.05   31.80
  -3  -3  -8  611.94   23.90
   3  -3   8  633.34   25.10
  -3  -3  -8  565.84   27.20
  -3   3  -9  224.68   21.80
   3   3   9  252.67   15.90
  -3   3  -9  235.08   14.20
   3  -3   9  231.68   13.40
  -3  -3  -9  218.08   15.50
  -3   3 -10  751.02   41.40
   3   3  10  764.02   34.00
  -3   3 -10  792.22   31.90
  -3  -3 -10  724.23   35.90
   3  -3  10  755.12   31.60
  -3   3 -11    5.60    9.10
   3   3  11    8.70    7.30
   3  -3  11   13.90    6.10
  -3  -3 -11    2.70    6.90
  -3   3 -12  352.26   30.10
   3   3  12  416.86   23.90
   3  -3  12  414.46   21.50
  -3  -3 -12  376.86   26.20
  -3   3 -13  256.87   28.70
   3   3  13  294.67   20.00
  -3  -3 -13  214.28   22.90
   3  -3  13  246.58   17.40
   3   3  14    6.10    9.30
  -3   3 -14    9.30   13.40
   3  -3  14    9.00    8.10
  -3  -3 -14   22.20   11.40
  -3   3 -15   36.90   17.30
   3   3  15   42.10   12.30
   3  -3  15   51.29   12.00
  -3  -3 -15   30.90   14.30
  -3   3 -16   27.30   19.10
   3   3  16   47.10   13.90
   3  -3  16   59.69   12.10
  -3  -3 -16   19.20   14.90
  -3   3 -17  -20.10   17.00
   3   3  17   39.20   14.70
   3  -3  17  -10.70    9.60
   3  -3  18  257.27   23.70
  -3   4  17   26.60   12.00
  -3  -4  17    9.30   10.40
  -3   4  16   76.19   13.70
  -3  -4  16   59.09   12.50
  -3   4  15   64.99   12.70
  -3  -4  15   30.10   10.30
  -3   4  14  914.91   41.50
  -3  -4  14  921.71   41.70
  -3   4  13   26.40    9.30
  -3  -4  13   36.00    9.10
  -3   4  12   23.80    8.30
  -3  -4  12   12.20    7.10
  -3   4  11    8.20    7.00
  -3  -4  11   -3.10    4.00
  -3  -4  11   -2.90    5.30
   3   4 -10    7.00    9.30
  -3   4  10   11.20    6.50
  -3  -4  10   19.00    6.30
  -3   4   9  330.77   19.10
   3   4  -9  398.96   28.80
  -3  -4   9  408.26   20.30
   3  -4  -9  346.67   20.70
  -3   4   8  848.92   34.60
  -3   4   8  841.92   32.00
  -3   4   8  829.22   42.00
   3   4  -8  778.92   43.90
  -3  -4   8  858.81   34.60
  -3  -4   8  810.62   33.50
   3  -4  -8  784.32   36.00
  -3   4   7   62.39    8.20
   3   4  -7   82.79   13.60
  -3   4   7   64.59   12.60
  -3   4   7   77.29    5.60
   3  -4  -7   63.79    8.00
  -3  -4   7   60.29    7.90
  -3  -4   7   61.49    6.30
  -3   4   6 1403.86   50.69
  -3   4   6 1365.76   51.59
   3   4  -6 1394.56   62.89
  -3   4   6 1308.97   61.49
   3  -4  -6 1371.66   53.69
  -3  -4   6 1340.67   51.99
  -3  -4   6 1419.46   51.89
  -3   4   5  314.17   13.50
  -3   4   5  332.17   24.10
   3   4  -5  314.77   23.10
  -3   4   5  330.77   16.30
   3  -4  -5  306.37   15.60
  -3  -4   5  305.27   14.40
  -3  -4   5  323.97   16.20
   3   4  -4  299.67   22.10
  -3   4   4  289.27   15.00
  -3   4   4  280.67   22.90
  -3   4   4  288.27   12.40
   3  -4  -4  302.37   14.50
  -3  -4   4  300.07   15.30
  -3  -4   4  319.77   13.90
  -3   4   3 1036.60   52.89
  -3   4   3 1168.88   41.60
  -3   4   3 1176.08   42.50
   3   4  -3 1035.40   51.29
   3  -4  -3 1124.69   42.90
  -3  -4   3 1137.79   42.60
  -3  -4   3 1122.39   42.50
  -3   4   2  136.19   17.20
   3   4  -2  163.38   17.70
  -3   4   2  129.49    9.70
   3  -4  -2  143.19    8.20
  -3  -4   2  164.38   10.60
  -3  -4   2  165.08    8.30
  -3   4   1  394.66   26.70
  -3   4   1  396.16   17.80
   3   4  -1  378.26   25.50
  -3  -4   1  408.56   16.70
   3  -4  -1  409.26   16.60
  -3  -4   1  383.86   18.50
   3  -4  -1  384.16   19.20
   3   4   0  243.38   21.80
  -3   4   0  194.38   19.80
  -3   4   0  240.58   12.40
   3   4   0  191.68   14.60
  -3   4   0  224.98   10.70
  -3  -4   0  203.98   10.30
   3  -4   0  237.18   10.30
   3  -4   0  223.78   12.80
  -3  -4   0  206.78   10.10
   3   4   1  411.16   25.80
  -3   4  -1  333.57   25.00
   3   4   1  425.36   21.70
  -3   4  -1  384.66   18.10
  -3   4  -1  434.26   17.20
   3  -4   1  394.56   18.50
  -3  -4  -1  426.06   17.50
  -3  -4  -1  429.06   17.00
  -3  -4  -1  414.46   17.10
   3   4   2  160.28   16.40
   3   4   2  164.68   13.70
  -3   4  -2  138.59   16.40
  -3   4  -2  151.28    9.90
  -3   4  -2  156.68    8.10
  -3  -4  -2  161.88    8.50
  -3  -4  -2  145.39    8.50
   3  -4   2  134.49    9.50
  -3  -4  -2  158.78    8.20
   3   4   3  464.65   23.10
  -3   4  -3  434.36   27.00
  -3   4  -3  466.25   19.20
  -3   4  -3  444.66   20.00
  -3  -4  -3  477.15   19.60
   3  -4   3  450.55   19.80
  -3  -4  -3  456.15   30.60
  -3  -4  -3  469.75   18.80
  -3  -4  -3  476.85   18.70
  -3   4  -4  753.12   28.10
  -3   4  -4  688.33   28.20
   3   4   4  686.53   31.00
  -3   4  -4  686.13   36.20
  -3  -4  -4  725.23   26.50
   3  -4   4  706.93   27.90
  -3  -4  -4  698.23   40.10
  -3  -4  -4  672.03   28.20
   3   4   5  136.09   12.70
  -3   4  -5  147.79    8.40
  -3   4  -5  123.99   10.10
  -3   4  -5  137.99   15.90
  -3  -4  -5  120.79    8.50
  -3  -4  -5  158.88   19.80
   3  -4   5  116.59    8.90
  -3   4  -6  331.07   16.90
  -3   4  -6  327.67   23.70
   3   4   6  319.47   18.90
   3  -4   6  365.26   16.60
  -3  -4  -6  349.67   14.90
  -3  -4  -6  340.77   16.80
   3   4   7    5.10    5.90
  -3   4  -7   16.90    8.20
  -3   4  -7    5.00    5.20
  -3  -4  -7   13.50    4.30
  -3  -4  -7   12.20    4.60
   3  -4   7   14.40    4.60
  -3   4  -8  200.88   21.60
  -3   4  -8  192.88   13.10
   3   4   8  184.08   15.70
   3  -4   8  163.38   11.70
  -3  -4  -8  193.68   13.20
  -3  -4  -8  171.48   10.60
  -3   4  -9  527.35   24.20
   3   4   9  522.75   27.00
  -3   4  -9  546.05   34.10
  -3  -4  -9  498.55   26.40
   3  -4   9  542.45   24.30
   3   4  10   30.20    9.30
  -3   4 -10    8.90   10.20
  -3   4 -10   30.20    7.60
   3  -4  10   20.50    6.60
  -3  -4 -10   32.60    8.20
   3   4  11   35.10    9.90
  -3   4 -11   18.50   11.50
   3  -4  11   27.20    7.70
  -3  -4 -11   29.10    9.20
   3   4  12   -5.60    8.40
  -3   4 -12    0.20   11.00
  -3  -4 -12  -10.10    7.00
   3  -4  12    2.70    6.50
  -3   4 -13  126.09   22.50
   3   4  13  105.19   14.80
  -3  -4 -13   94.19   16.00
   3  -4  13   96.99   12.50
   3   4  14  686.13   34.80
  -3   4 -14  577.94   45.20
   3  -4  14  702.23   32.80
  -3  -4 -14  552.94   38.30
  -3   4 -15   51.49   19.60
   3   4  15  127.09   17.00
  -3  -4 -15   82.59   18.30
   3  -4  15   71.49   13.10
  -3   4 -16  112.79   27.20
   3   4  16  151.28   19.70
  -3  -4 -16  146.59   23.60
   3  -4  16  165.78   18.00
   3   4  17   14.50   14.30
   3  -4  17    4.50   11.10
  -3   5  17  189.48   20.20
  -3  -5  17  186.58   20.80
  -3   5  16    2.80   10.80
  -3  -5  16    1.50    9.90
  -3   5  15   57.69   13.00
  -3  -5  15   86.69   14.10
  -3   5  14   -6.80    8.70
  -3  -5  14    7.10    8.20
  -3   5  13  138.89   16.00
  -3  -5  13  165.98   16.80
  -3   5  12  412.76   24.50
  -3  -5  12  478.75   25.70
  -3   5  11  274.77   18.30
  -3  -5  11  235.98   17.50
  -3   5  10  827.42   36.60
  -3  -5  10  826.52   36.50
  -3   5   9   84.99   11.00
  -3  -5   9   96.29   11.20
   3   5  -8  114.19   18.60
  -3   5   8  107.99   11.80
  -3  -5   8  114.19   11.80
   3   5  -7  200.38   22.90
  -3   5   7  162.88   20.90
  -3   5   7  205.78   14.40
  -3  -5   7  195.78   13.80
  -3  -5   7  214.48   11.70
   3  -5  -7  226.18   14.10
   3   5  -6   28.10   11.10
  -3   5   6   51.99    8.10
  -3   5   6   32.70   11.50
  -3  -5   6   48.80    5.70
   3  -5  -6   51.89    6.70
  -3  -5   6   45.70    7.40
  -3   5   5  690.73   40.60
  -3   5   5  676.53   30.20
   3   5  -5  702.63   40.30
   3  -5  -5  675.03   29.70
  -3  -5   5  742.43   29.00
  -3  -5   5  737.83   30.70
  -3   5   4  298.77   27.60
   3   5  -4  300.87   24.50
  -3   5   4  314.17   16.60
  -3  -5   4  284.77   14.10
   3  -5  -4  311.27   15.00
  -3  -5   4  284.77   16.40
  -3   5   3   -0.60    4.60
   3   5  -3    6.20    7.80
  -3   5   3   12.00   10.00
  -3  -5   3    4.50    2.30
   3  -5  -3    4.20    2.60
  -3  -5   3    1.90    4.30
   3   5  -2  526.45   34.20
  -3   5   2  533.25   36.10
  -3   5   2  630.64   25.90
  -3  -5   2  653.83   26.50
   3  -5  -2  581.84   24.00
  -3  -5   2  547.75   23.70
  -3   5   1   25.80    6.10
   3   5  -1   38.50    8.80
   3   5  -1   29.50   11.10
  -3   5   1    6.50    9.60
   3  -5  -1   45.70    7.80
   3  -5  -1   27.20    3.80
  -3  -5   1   44.20    4.70
  -3  -5   1   37.40    7.00
  -3   5   0  409.56   19.50
   3   5   0  409.96   28.40
   3   5   0  398.66   23.10
  -3   5   0  461.55   30.60
  -3  -5   0  399.56   17.80
  -3  -5   0  388.16   17.00
  -3  -5   0  433.96   18.20
   3  -5   0  424.16   17.60
   3  -5   0  409.66   20.90
  -3   5  -1  365.16   27.20
  -3   5  -1  354.66   17.60
   3   5   1  346.67   20.90
   3   5   1  284.57   24.50
   3  -5   1  352.96   18.30
  -3  -5  -1  336.27   14.80
  -3  -5  -1  330.57   15.60
   3  -5   1  370.66   15.20
   3   5   2  246.88   17.50
  -3   5  -2  266.77   14.70
   3   5   2  272.07   22.40
  -3   5  -2  256.57   24.60
   3  -5   2  254.47   14.70
  -3  -5  -2  258.17   12.70
  -3  -5  -2  247.98   12.70
  -3  -5  -2  253.67   11.60
  -3   5  -3   96.49    7.00
  -3   5  -3   75.59   14.10
   3   5   3   69.89   10.70
  -3   5  -3  108.49    9.70
  -3  -5  -3   83.99    7.00
   3  -5   3   95.89    9.20
  -3  -5  -3   75.69    5.70
  -3  -5  -3   81.39    7.40
  -3   5  -4  247.98   14.70
  -3   5  -4  241.58   24.00
   3   5   4  252.57   17.60
   3  -5   4  246.88   14.20
  -3  -5  -4  271.77   13.60
  -3  -5  -4  263.27   12.70
  -3   5  -5  700.23   39.30
   3   5   5  689.53   32.20
  -3   5  -5  678.83   29.10
   3  -5   5  682.63   29.10
  -3  -5  -5  678.73   29.00
  -3  -5  -5  707.23   26.70
  -3   5  -6   26.20    6.60
   3   5   6   26.00    7.90
  -3   5  -6   18.40    9.60
   3  -5   6   17.90    5.50
  -3  -5  -6   21.80    5.00
  -3  -5  -6   36.10    5.40
  -3   5  -7   12.50    6.00
  -3   5  -7   22.70    9.90
   3   5   7   16.60    8.10
   3  -5   7    9.70    5.30
  -3  -5  -7   10.60    4.90
  -3  -5  -7   14.80    4.60
  -3   5  -8  112.09   11.10
   3   5   8  106.69   13.50
  -3   5  -8   73.09   15.30
   3  -5   8  109.49   11.10
  -3  -5  -8  106.29    9.00
  -3  -5  -8  102.49   10.80
  -3   5  -9  254.07   27.20
  -3   5  -9  241.18   15.70
   3   5   9  252.07   18.70
   3  -5   9  253.57   15.90
  -3  -5  -9  233.48   16.60
  -3   5 -10  465.25   36.50
  -3   5 -10  572.74   26.00
   3   5  10  546.65   29.50
  -3  -5 -10  559.24   29.40
   3  -5  10  556.84   26.70
  -3   5 -11  212.38   27.20
   3   5  11  221.38   20.00
   3  -5  11  228.28   16.10
  -3  -5 -11  196.48   18.60
  -3   5 -12   76.99   19.10
   3   5  12   59.79   12.60
   3  -5  12   67.89   10.50
  -3  -5 -12   55.39   12.00
   3   5  13  118.19   16.50
  -3   5 -13  137.99   25.30
   3  -5  13  133.99   14.90
  -3  -5 -13  136.09   18.40
   3   5  14   19.00   11.90
  -3   5 -14   49.20   19.70
  -3  -5 -14   11.30   12.00
   3  -5  14   20.20    9.70
  -3   5 -15   41.90   21.40
   3   5  15   36.60   13.70
   3  -5  15   60.99   12.80
  -3   5 -16   18.80   21.60
   3   5  16   19.20   13.40
   3  -5  16   20.90   11.20
   3  -5  17  190.38   21.10
  -3   6  16   31.70   12.70
  -3  -6  16   49.00   13.90
  -3   6  15  364.16   24.90
  -3  -6  15  349.27   25.60
  -3   6  14  117.09   15.50
  -3  -6  14  139.89   17.50
  -3   6  13  558.94   30.30
  -3  -6  13  573.24   31.50
  -3   6  12   89.69   13.20
  -3  -6  12   81.39   12.80
  -3   6  11   40.20    9.80
  -3  -6  11   49.80   10.70
  -3   6  10   21.00    8.80
  -3  -6  10   18.10    8.50
  -3   6   9  796.42   35.90
  -3  -6   9  790.42   36.30
  -3   6   8  273.37   17.70
  -3  -6   8  277.77   18.30
  -3   6   7  678.53   30.50
  -3  -6   7  620.94   30.10
  -3   6   6  382.96   20.20
  -3   6   6  278.87   29.40
  -3  -6   6  372.46   20.70
  -3   6   5  145.29   13.30
  -3   6   5  128.69   20.30
   3   6  -5  125.59   20.00
  -3  -6   5  146.19    9.30
  -3  -6   5  149.59   13.40
   3   6  -4  492.05   34.50
  -3   6   4  408.16   33.50
  -3   6   4  457.25   23.20
  -3  -6   4  474.95   24.00
  -3  -6   4  505.25   21.20
   3   6  -3   65.09   15.10
  -3   6   3   69.79    9.70
  -3   6   3   87.19   17.90
  -3  -6   3   84.69   10.30
  -3  -6   3   81.29    6.70
   3   6  -2   81.39   16.30
  -3   6   2   52.09    8.60
  -3   6   2   37.10   13.80
   3   6  -2   65.39   11.60
  -3  -6   2   60.89    6.10
  -3  -6   2   52.69    8.80
   3   6  -1  620.54   31.00
   3   6  -1  543.75   36.90
  -3   6   1  585.84   39.50
  -3   6   1  639.94   27.20
  -3  -6   1  536.55   24.40
  -3  -6   1  589.44   25.00
  -3  -6   1  616.64   28.10
  -3   6   0   64.19   16.40
   3   6   0  101.79   13.90
  -3   6   0  100.39   10.90
  -3  -6   0  113.59    7.00
   3  -6   0   80.69   11.10
  -3  -6   0  126.79    8.50
   3   6   1   93.79   12.80
  -3   6  -1   56.69    9.00
  -3   6  -1   93.89   18.30
   3  -6   1   59.59    9.80
  -3  -6  -1   89.99    7.30
  -3  -6  -1   73.59    6.10
  -3   6  -2   49.80    8.30
   3   6   2   62.89   11.20
  -3   6  -2   50.19   14.30
  -3  -6  -2   52.99    6.20
  -3  -6  -2   53.99    6.60
   3  -6   2   43.00    8.00
  -3  -6  -2   61.69    5.10
  -3   6  -3  146.89   20.80
   3   6   3  147.09   15.50
  -3   6  -3  145.99   12.80
  -3  -6  -3  144.59    9.90
  -3  -6  -3  155.08    9.90
   3  -6   3  133.99   12.60
  -3   6  -4  430.56   21.00
  -3   6  -4  376.96   30.30
   3   6   4  363.06   23.30
   3  -6   4  402.76   21.10
  -3  -6  -4  405.96   19.30
  -3  -6  -4  418.66   18.40
  -3   6  -5    7.00    9.80
  -3   6  -5   -1.10    5.70
   3   6   5    3.70    7.50
  -3  -6  -5   10.00    4.40
  -3  -6  -5    2.90    3.40
   3  -6   5    4.60    5.20
  -3   6  -6  143.29   20.90
   3   6   6  167.18   16.60
  -3   6  -6  148.79   13.20
   3  -6   6  136.19   12.70
  -3  -6  -6  141.19    9.80
  -3  -6  -6  102.99   10.20
   3   6   7  249.78   19.00
  -3   6  -7  202.78   15.30
  -3   6  -7  200.88   25.10
  -3  -6  -7  228.78   12.70
  -3  -6  -7  229.58   14.70
   3  -6   7  210.08   15.20
   3   6   8   95.09   13.80
  -3   6  -8   82.29   18.50
  -3   6  -8  110.69   12.00
  -3  -6  -8   90.59   10.70
  -3  -6  -8   76.29    8.40
   3  -6   8  100.59   11.80
   3   6   9  476.75   27.40
  -3   6  -9  479.45   24.30
  -3   6  -9  442.86   36.30
   3  -6   9  467.95   24.40
  -3  -6  -9  481.25   25.90
  -3   6 -10  -14.00   11.10
   3   6  10    0.00    8.90
   3  -6  10   17.90    7.70
  -3  -6 -10    3.60    6.70
   3   6  11    0.00    9.70
  -3   6 -11    3.30   14.00
   3  -6  11   20.00    8.30
  -3  -6 -11    6.40    7.80
  -3   6 -12   23.00   16.50
   3   6  12   32.00   11.80
  -3  -6 -12    2.60    8.80
   3  -6  12   19.10    8.40
   3   6  13  196.98   21.10
  -3   6 -13  259.17   34.50
  -3  -6 -13  197.68   21.80
   3  -6  13  198.28   18.80
  -3   6 -14  153.18   29.20
   3   6  14  176.78   20.60
   3  -6  14  182.08   19.10
   3   6  15  165.18   20.50
  -3   6 -15  155.08   32.00
   3  -6  15  184.98   19.90
   3   6  16   13.30   14.00
   3  -6  16   -8.30   10.00
  -3   7  15   55.19   14.10
  -3  -7  15   57.59   14.90
  -3   7  14    3.90   10.30
  -3  -7  14    8.20   10.00
  -3   7  13  214.18   20.40
  -3  -7  13  265.67   23.20
  -3   7  12    3.90    9.50
  -3  -7  12    7.50    8.30
  -3   7  11  629.74   32.20
  -3  -7  11  602.34   32.80
  -3   7  10   19.80    9.40
  -3  -7  10   18.60    9.30
  -3   7   9  422.56   24.30
  -3  -7   9  382.56   23.80
  -3   7   8  399.16   23.20
  -3  -7   8  376.56   22.90
  -3   7   7   28.90    9.10
  -3  -7   7   17.10    7.80
  -3   7   6    9.50    7.10
  -3  -7   6   14.60    7.10
   3   7  -5 1319.17   58.69
  -3   7   5 1230.68   68.09
  -3   7   5 1348.86   53.59
  -3  -7   5 1394.06   54.89
  -3   7   4   52.99    9.50
  -3   7   4   59.19   18.00
   3   7  -4   31.80   11.30
  -3  -7   4   53.19    9.80
  -3  -7   4   42.20    5.70
  -3   7   3   24.50   14.50
   3   7  -3   48.00   11.50
  -3   7   3   43.60    9.40
  -3  -7   3   71.49   10.80
  -3  -7   3   54.19    6.50
  -3  -7   3   59.59    7.00
  -3   7   2   -3.70    6.70
  -3   7   2    2.20   11.10
   3   7  -2   11.20    9.20
  -3  -7   2    4.50    6.50
  -3  -7   2    8.70    3.60
  -3  -7   2   10.10    3.60
   3   7  -1   54.09   11.80
  -3   7   1   62.19   17.40
  -3   7   1   43.10    8.90
  -3  -7   1   23.40    7.40
  -3  -7   1   62.99    6.90
  -3   7   0  894.41   38.20
   3   7   0  841.72   41.60
  -3   7   0  890.11   53.79
   3  -7   0  878.91   40.40
  -3  -7   0  893.81   36.60
  -3  -7   0  938.61   34.70
  -3   7  -1   92.39   11.50
  -3   7  -1   99.89   20.10
   3   7   1  101.49   14.60
  -3  -7  -1   90.79    8.70
   3  -7   1   94.89   12.60
  -3   7  -2   15.00    7.10
  -3   7  -2    8.50   11.40
   3   7   2   21.60   10.00
   3  -7   2   17.80    7.50
  -3  -7  -2   25.70    5.10
  -3  -7  -2   24.80    5.90
  -3   7  -3   11.10    7.30
   3   7   3   21.10    9.40
  -3   7  -3   -3.30   11.90
  -3  -7  -3   12.90    4.90
   3  -7   3    5.00    6.50
  -3  -7  -3   12.40    4.30
   3   7   4  -18.10    7.90
  -3   7  -4   -3.70   10.80
  -3   7  -4    2.20    6.40
   3  -7   4   -4.90    5.80
  -3  -7  -4    1.60    4.40
  -3  -7  -4    1.60    3.70
  -3   7  -5  321.17   33.90
   3   7   5  275.57   21.60
  -3   7  -5  270.07   18.10
  -3  -7  -5  281.97   15.30
   3  -7   5  305.17   19.20
  -3  -7  -5  306.47   16.80
  -3   7  -6   -8.00    6.90
   3   7   6    5.80    8.50
  -3   7  -6  -11.40   10.60
  -3  -7  -6    1.90    4.60
   3  -7   6   -6.40    5.80
  -3  -7  -6   -2.60    3.90
   3   7   7   96.49   15.30
  -3   7  -7  155.68   25.10
  -3   7  -7  141.29   13.80
  -3  -7  -7  121.59   10.50
   3  -7   7  103.69   13.00
  -3  -7  -7  121.79   12.20
  -3   7  -8  389.16   38.50
  -3   7  -8  430.76   23.10
   3   7   8  407.06   26.30
  -3  -7  -8  394.76   23.20
   3  -7   8  471.05   24.50
  -3   7  -9   43.60   17.20
   3   7   9   34.10   12.00
  -3   7  -9   40.40    9.90
  -3  -7  -9   49.20    9.50
   3  -7   9   39.00    9.90
  -3   7 -10   46.70   18.40
   3   7  10   28.10   12.20
   3  -7  10   23.60    9.40
  -3  -7 -10   30.30    9.20
   3   7  11  323.77   24.20
  -3   7 -11  304.67   37.20
   3  -7  11  333.87   22.60
  -3  -7 -11  302.27   23.20
  -3   7 -12   37.30   20.00
   3   7  12   25.10   13.10
   3  -7  12   26.90   10.60
  -3   7 -13  247.08   37.30
   3   7  13  214.18   23.60
   3  -7  13  280.57   24.00
   3   7  14   14.80   13.80
   3  -7  14    9.40   11.20
   3   7  15   40.60   16.10
   3  -7  15   31.30   13.60
   3   8 -15  163.68   27.70
   3   8 -14    6.30   18.00
  -3   8  14    0.00   11.50
  -3  -8  14    7.60   11.20
  -3   8  13  185.08   20.10
   3   8 -13  209.38   27.80
  -3  -8  13  194.28   21.60
  -3   8  12  195.88   19.80
   3   8 -12  160.28   25.10
  -3  -8  12  194.68   21.30
   3   8 -11   18.90   15.70
  -3   8  11   16.80   10.70
  -3  -8  11   18.60   10.00
  -3   8  10    0.30    9.30
   3   8 -10  -13.90   13.00
  -3  -8  10    8.90    9.50
  -3   8   9  555.34   30.80
   3   8  -9  613.84   38.20
  -3  -8   9  602.84   32.60
   3   8  -8   35.80   14.80
  -3   8   8   29.80   10.50
  -3  -8   8   21.80    9.40
   3   8  -7   38.00   14.30
  -3   8   7   50.79   11.40
  -3  -8   7   29.10   10.20
   3   8  -6   12.40   11.60
  -3   8   6   -6.60    7.70
  -3  -8   6    6.60    7.40
   3   8  -5   32.20   12.00
  -3   8   5   24.40    9.20
  -3  -8   5   40.50   10.10
   3   8  -4  408.26   28.90
  -3   8   4  430.56   24.40
  -3  -8   4  443.86   25.50
   3   8  -3  393.86   27.80
  -3   8   3  388.96   23.10
  -3   8   3  462.75   38.50
  -3  -8   3  378.26   23.90
  -3   8   2    0.50   13.60
  -3   8   2   21.30    8.20
   3   8  -2    1.50    9.70
  -3  -8   2    3.20    7.40
  -3   8   1  644.14   48.20
   3   8  -1  710.53   37.40
  -3   8   1  708.93   32.90
  -3  -8   1  670.23   29.90
   3   8   0   -3.10    9.10
  -3   8   0   -4.10   12.90
  -3   8   0   -6.90    7.30
   3  -8   0    3.60    7.00
  -3  -8   0    2.40    3.50
   3   8   1  247.18   23.10
  -3   8  -1  178.08   28.90
  -3   8  -1  231.68   16.90
  -3  -8  -1  248.48   14.40
   3  -8   1  243.58   19.50
  -3   8  -2   37.40    9.20
  -3   8  -2   34.40   16.80
   3   8   2   27.70   10.80
  -3  -8  -2   18.70    5.40
  -3  -8  -2   30.40    6.50
   3  -8   2   32.40   10.20
  -3   8  -3  238.28   32.40
  -3   8  -3  222.28   16.40
   3   8   3  217.98   21.90
  -3  -8  -3  225.78   14.10
  -3  -8  -3  216.98   14.10
   3  -8   3  211.58   19.50
   3   8   4  691.63   36.00
  -3   8  -4  636.54   31.20
  -3   8  -4  569.34   45.70
  -3  -8  -4  684.83   30.50
   3  -8   4  655.03   33.40
  -3  -8  -4  678.43   28.40
  -3   8  -5   34.80   16.60
  -3   8  -5   26.80    9.20
   3   8   5   19.30   11.20
  -3  -8  -5   18.90    6.50
   3  -8   5   18.70    8.60
  -3  -8  -5   15.80    5.90
   3   8   6   -0.70   10.00
  -3   8  -6    5.20    8.00
  -3   8  -6   -8.10   13.70
   3  -8   6    6.90    7.80
  -3  -8  -6    5.10    5.40
  -3  -8  -6    3.50    4.90
  -3   8  -7   95.79   22.70
   3   8   7  107.89   16.50
  -3   8  -7  107.29   13.40
  -3  -8  -7  105.09   10.80
   3  -8   7   89.89   13.60
  -3  -8  -7   89.89   11.40
  -3   8  -8   11.00    9.20
   3   8   8    7.60   11.10
  -3   8  -8   -0.70   14.20
   3  -8   8   -0.70    7.40
  -3  -8  -8   11.00    6.80
   3   8   9  327.57   25.70
  -3   8  -9  360.26   41.50
   3  -8   9  359.76   24.10
   3   8  10    9.30   12.30
  -3   8 -10  -16.00   15.40
   3  -8  10    4.30    9.30
   3   8  11   -6.90   11.50
  -3   8 -11   -0.50   18.30
   3  -8  11   -9.40    9.10
   3   8  12  247.48   24.60
  -3   8 -12  121.99   29.50
   3  -8  12  215.78   22.00
   3   8  13  181.48   22.20
   3  -8  13  164.98   20.10
   3   8  14  -10.50   14.80
   3  -8  14   22.60   13.20
   3   9 -13  166.48   26.50
  -3   9  13  174.98   20.30
  -3  -9  13  153.48   20.90
  -3   9  12   39.50   13.50
   3   9 -12   39.20   18.20
  -3  -9  12   36.60   10.80
  -3  -9  12   31.60   13.10
   3   9 -11   84.29   21.00
  -3   9  11   84.79   15.10
  -3  -9  11   74.29   15.40
   3   9 -10   35.40   16.90
  -3   9  10   25.30   11.30
  -3  -9  10   19.60   11.20
  -3   9   9  -19.10    9.10
   3   9  -9   -7.00   14.30
  -3  -9   9    1.80    9.20
   3   9  -8  161.08   23.90
  -3   9   8  175.98   19.00
  -3  -9   8  161.28   19.00
  -3   9   7  252.77   21.70
   3   9  -7  247.78   26.90
  -3  -9   7  210.98   21.50
   3   9  -6   46.90   16.10
  -3   9   6   60.99   12.70
  -3  -9   6   54.19   12.20
   3   9  -5  617.44   37.90
  -3   9   5  594.74   32.10
  -3  -9   5  666.53   34.50
   3   9  -4   45.80   13.80
  -3   9   4   51.89   11.60
  -3  -9   4   51.79   11.70
  -3   9   3   42.10   10.70
   3   9  -3   48.90   13.10
  -3  -9   3   63.69   12.40
   3   9  -2   35.60   13.30
  -3   9   2   42.70   11.00
   3   9  -1  366.86   26.50
  -3   9   1  332.27   22.10
   3   9   0  197.48   22.20
  -3   9   0  229.98   19.40
  -3   9   0  199.98   31.70
  -3   9  -1  574.14   47.20
  -3   9  -1  532.75   28.30
   3   9   1  536.05   33.20
  -3   9  -2  136.49   28.20
   3   9   2  134.99   18.70
  -3   9  -2  142.59   15.80
  -3  -9  -2  150.48   13.30
   3  -9   2  147.49   18.00
  -3   9  -3   74.99   12.60
  -3   9  -3   97.49   24.70
   3   9   3   77.29   15.60
   3  -9   3   72.89   13.50
  -3  -9  -3   76.69    9.90
   3   9   4   -7.60   10.60
  -3   9  -4    1.30    8.60
  -3   9  -4   15.10   16.80
  -3  -9  -4   -2.60    5.80
   3  -9   4    7.50    9.60
   3   9   5  698.53   38.60
  -3   9  -5  703.73   33.30
  -3   9  -5  622.54   51.19
  -3  -9  -5  678.33   29.80
   3  -9   5  651.93   35.50
  -3   9  -6    6.30    9.10
   3   9   6   10.20   12.30
  -3   9  -6   42.50   20.20
  -3  -9  -6   -6.40    5.80
   3  -9   6    9.90    9.50
  -3   9  -7  256.87   37.60
   3   9   7  244.48   25.00
  -3   9  -7  255.27   19.40
   3  -9   7  231.28   22.30
  -3   9  -8  270.07   38.30
   3   9   8  326.77   28.60
   3  -9   8  358.16   24.90
   3   9   9    6.80   12.10
  -3   9  -9   13.70   20.60
   3  -9   9   -3.60    9.20
   3   9  10  -20.90   10.80
   3  -9  10    7.00   10.80
   3   9  11   72.59   17.40
   3  -9  11  122.59   17.90
   3   9  12   10.70   14.90
   3  -9  12   23.90   13.30
  -3 -10  12  100.39   15.20
  -3  10  11    2.40   12.10
   3  10 -11   -5.80   17.60
  -3 -10  11   12.00   12.10
  -3 -10  11    7.30    9.80
  -3  10  10   66.99   15.40
   3  10 -10   70.29   20.80
  -3 -10  10   60.79   15.10
   3  10  -9  355.96   34.00
  -3  10   9  351.26   25.40
  -3 -10   9  355.26   27.70
   3  10  -8   47.10   18.10
  -3  10   8   46.80   13.60
  -3 -10   8   31.50   12.70
   3  10  -7   49.30   17.30
  -3  10   7   59.89   14.20
  -3 -10   7   24.60   12.10
   3  10  -6    0.90   13.90
  -3  10   6   -5.90    9.80
  -3 -10   6    2.00   10.10
   3  10  -5   85.19   18.90
  -3  10   5  142.89   17.40
  -3 -10   5  132.39   18.00
  -3  10   4   43.80   12.40
   3  10  -4   52.19   15.90
  -3 -10   4   35.60   11.40
   3  10  -3  547.45   35.00
  -3  10   3  563.44   30.90
   3  10  -2  159.18   21.40
  -3  10   2  173.08   18.60
   3  10  -1  280.17   27.40
  -3  10   1  272.17   20.80
   3  10   0    9.10   12.30
  -3  10   0   25.90   11.00
   3  10   1  393.86   29.60
  -3  10  -1  413.96   25.20
  -3 -10  -1  374.16   21.20
   3  10   2   75.49   16.90
  -3  10  -2   48.30   12.10
   3 -10   2   66.89   14.00
  -3 -10  -2   58.09    9.50
  -3  10  -3  460.85   27.10
   3  10   3  491.45   32.10
  -3 -10  -3  475.75   24.40
   3 -10   3  503.95   31.80
  -3  10  -4   64.49   12.80
   3  10   4   72.99   15.90
   3 -10   4   53.49   13.70
  -3 -10  -4   43.90    9.20
   3  10   5  315.27   28.20
  -3  10  -5  333.07   21.90
   3 -10   5  260.27   25.10
  -3 -10  -5  247.88   17.30
  -3  10  -6    7.50   10.80
   3  10   6   18.60   13.70
   3 -10   6   19.40   11.80
  -3 -10  -6    0.50    6.90
   3  10   7    6.40   13.10
   3 -10   7   11.70   11.20
   3  10   8   36.40   15.10
   3 -10   8   14.00   12.00
   3  10   9  675.53   40.40
   3 -10   9  682.73   39.20
   3  10  10   41.20   16.60
   3 -10  10   12.80   12.80
   3 -10  11  180.68   22.70
  -3  11   9   43.10   14.40
   3  11  -9   28.90   19.50
  -3 -11   9   13.50   13.90
  -3 -11   9   12.80    9.90
  -3  11   8   19.60   13.40
   3  11  -8   -9.60   15.70
  -3 -11   8  -13.30   11.10
  -3  11   7  181.88   20.10
   3  11  -7  184.98   26.20
  -3 -11   7  134.79   20.50
  -3  11   6  142.49   19.30
   3  11  -6  154.48   23.90
  -3 -11   6  149.39   21.00
  -3  11   5  339.47   25.30
   3  11  -5  348.87   33.50
  -3 -11   5  319.67   28.80
  -3  11   4    2.90   11.30
   3  11  -4   13.00   14.80
   3  11  -3   68.29   19.20
  -3  11   3   53.49   14.10
  -3  11   2  162.98   19.40
   3  11  -2  214.78   25.60
   3  11  -1  386.46   33.20
  -3  11   1  342.17   24.60
  -3 -11   1  326.47   21.20
   3  11   0   28.20   14.70
  -3  11   0    8.90   11.10
  -3 -11   0   22.80    8.40
   3  11   1  376.06   30.30
  -3  11  -1  407.36   26.10
  -3 -11  -1  392.16   22.50
  -3  11  -2    9.90   11.20
   3  11   2   -3.20   13.40
  -3 -11  -2   12.20    7.90
  -3  11  -3   69.09   13.50
   3  11   3   73.19   17.60
   3 -11   3    6.60   11.10
  -3 -11  -3   56.79   10.70
   3  11   4   27.00   15.10
  -3  11  -4   48.50   12.70
  -3 -11  -4   31.60    8.90
   3 -11   4   22.30   12.60
   3  11   5  355.06   32.40
  -3 -11  -5  364.56   22.00
   3 -11   5  436.46   30.00
   3  11   6  256.27   27.40
   3 -11   6  193.18   23.50
   3  11   7  231.78   26.60
   3 -11   7  210.88   24.70
   3  11   8   34.90   16.00
   3 -11   8   -6.80   12.60
   3  12  -6   57.09   20.60
  -3  12   6   41.40   15.50
  -3  12   5   72.79   16.30
   3  12  -5  105.59   22.90
  -3 -12   5   82.89   14.00
  -3  12   4   76.29   15.70
   3  12  -4   98.09   21.90
  -3 -12   4   92.69   14.20
   3  12  -3  163.48   25.20
  -3  12   3  167.38   20.20
  -3 -12   3  137.49   16.40
   3  12  -2  247.08   28.40
  -3  12   2  259.47   23.70
  -3 -12   2  236.48   20.60
   3  12  -1  232.38   28.20
  -3  12   1  205.98   21.40
  -3 -12   1  219.48   19.40
  -3  12   0    3.40   12.30
   3  12   0  -10.80   14.40
  -3 -12   0   -0.70    8.30
   3  12   1  121.69   21.90
  -3  12  -1  184.68   19.80
  -3 -12  -1  144.99   16.10
  -3  12  -2  348.37   25.10
   3  12   2  326.77   32.30
  -3 -12  -2  328.47   22.10
   3  12   3   91.39   19.60
  -3 -12  -3  120.09   14.90
   3  12   4  114.99   21.10
  -3 -12  -4   88.59   12.90
   3  12   5   57.99   18.70
   3 -12   5   40.30   16.40
  -4   0  18  125.09   16.40
  -4   0  17   -0.40    9.00
  -4   0  16  340.27   22.40
  -4   0  15    0.30    7.60
  -4   0  14   43.70    9.30
  -4   0  13    0.40    6.20
  -4   0  12  616.94   28.00
  -4   0  11    3.60    4.80
   4   0 -10  237.78   18.90
  -4   0  10  242.48   15.00
  -4   0  10  244.08   14.20
   4   0  -9   -1.30    4.80
  -4   0   9   -3.60    3.80
  -4   0   9    1.50    3.40
  -4   0   8  390.86   17.80
   4   0  -8  372.86   22.60
  -4   0   8  421.06   14.90
  -4   0   8  378.06   19.60
  -4   0   7   -0.50    3.10
   4   0  -7   -1.20    3.80
  -4   0   7   -1.70    2.90
  -4   0   7   -3.70    2.50
  -4   0   6  120.19    7.80
  -4   0   6  123.89    6.60
  -4   0   6  121.89    9.20
   4   0  -6  113.49   11.20
  -4   0   5    3.20    2.80
  -4   0   5   -1.00    2.60
  -4   0   5    3.80    3.10
   4   0  -5   -2.50    3.10
  -4   0   4 1976.30   69.69
   4   0  -4 2101.49   76.89
  -4   0   4 1954.70   75.29
  -4   0   4 2140.69   76.29
  -4   0   4 2017.80   67.89
  -4   0   3   -5.00    2.80
  -4   0   3   -5.20    2.50
  -4   0   3   -8.20    1.80
  -4   0   3   -7.60    2.60
  -4   0   3   -6.30    2.50
   4   0  -3   -8.70    2.80
  -4   0   2 2820.92   97.59
  -4   0   2 2904.61  104.99
  -4   0   2 2876.11   96.49
  -4   0   2 3082.79  105.69
  -4   0   2 2888.11  105.39
  -4   0   1   -0.40    2.60
  -4   0   1    0.70    2.50
  -4   0   1    1.30    2.80
  -4   0   1   -1.00    2.20
  -4   0   0 1018.80   35.80
  -4   0   0  999.40   39.00
  -4   0  -1   -6.10    3.10
  -4   0  -1   -7.80    3.20
  -4   0  -2  894.81   33.10
  -4   0  -2  920.01   35.80
  -4   0  -3    1.90    1.40
  -4   0  -3   14.40    5.00
  -4   0  -3  -10.10    4.00
  -4   0  -3   -1.20    1.20
   4   0   4  263.77   11.30
  -4   0  -4  270.57   11.70
  -4   0  -4  263.37   13.40
  -4   0  -4  274.67   11.60
  -4   0  -5    3.00    2.50
  -4   0  -5    2.20    2.40
   4   0   5    0.40    2.50
   4   0   6 3871.11  133.59
  -4   0  -6 3887.01  142.49
  -4   0  -6 4050.89  142.29
  -4   0  -7    2.30    3.70
   4   0   7   -1.80    3.10
  -4   0  -7   -1.80    3.20
   4   0   8    8.10    4.20
  -4   0  -8    6.20    4.60
  -4   0  -8    7.30    4.50
  -4   0  -9    4.10    5.30
   4   0   9   -0.10    4.20
  -4   0 -10 1493.95   63.89
   4   0  10 1535.75   56.59
   4   0  11   -6.50    4.90
  -4   0 -11   -5.40    6.40
  -4   0 -12  359.56   26.80
   4   0  12  440.16   21.80
  -4   0 -13   -4.20    9.00
   4   0  13   -0.20    6.30
  -4   0 -14  217.08   25.20
   4   0  14  316.87   19.80
  -4   0 -15    8.70   12.40
   4   0  15    4.90    8.10
  -4   0 -16  174.88   26.70
   4   0  16  227.58   19.90
  -4   0 -17   13.70   17.20
  -4   0 -18  234.08   34.00
  -4   1  18  135.79   17.40
  -4  -1  18  136.39   17.30
  -4   1  17    8.10    9.90
  -4  -1  17    2.70    9.30
  -4   1  16  243.48   18.50
  -4  -1  16  228.58   20.10
  -4   1  15   27.20    9.10
  -4  -1  15   11.00    8.40
  -4   1  14  236.58   16.80
  -4  -1  14  224.48   16.90
  -4   1  13  101.39   11.80
  -4  -1  13   88.29   11.20
  -4   1  12  417.26   21.70
  -4  -1  12  412.96   21.60
  -4   1  11   92.49    9.80
  -4  -1  11   84.39    9.70
   4   1 -10   17.30    8.00
  -4   1  10   14.10    5.60
  -4   1  10   27.50    6.60
  -4  -1  10   21.70    6.00
   4  -1 -10   31.40    8.10
  -4  -1  10   21.80    4.90
  -4   1   9   15.60    5.50
  -4   1   9   18.00    5.20
   4   1  -9   10.10    6.90
  -4  -1   9   12.20    3.10
  -4  -1   9    9.10    4.00
  -4  -1   9   17.40    4.90
   4  -1  -9   23.90    7.00
   4   1  -8 2077.29   84.59
  -4   1   8 2099.79   74.69
  -4   1   8 2146.99   81.29
  -4  -1   8 2135.79   74.79
  -4  -1   8 2108.99   78.99
   4  -1  -8 2050.99   82.29
  -4  -1   8 2100.99   69.99
  -4   1   7  373.16   15.90
  -4   1   7  324.37   18.20
   4   1  -7  302.77   20.00
  -4  -1   7  333.47   16.30
   4  -1  -7  365.86   19.30
  -4  -1   7  308.37   15.30
  -4  -1   7  326.87   13.10
   4   1  -6   89.59   10.90
  -4   1   6  100.69    9.80
  -4   1   6   96.59    7.20
  -4  -1   6   90.69    7.20
   4  -1  -6   98.09    9.70
  -4  -1   6   98.09    5.90
  -4  -1   6  106.39    7.70
   4   1  -5   16.70    5.60
  -4   1   5   12.40    3.50
  -4   1   5   14.80    4.80
  -4  -1   5   18.00    3.20
  -4  -1   5   16.50    3.50
  -4  -1   5   24.80    4.10
   4  -1  -5   12.10    4.30
  -4   1   4   16.40    3.10
  -4   1   4   11.60    4.50
   4   1  -4   16.70    5.10
  -4  -1   4   12.50    2.80
   4  -1  -4   13.30    3.50
  -4  -1   4   11.40    2.80
  -4  -1   4    6.60    2.80
   4   1  -3  169.18   12.20
  -4   1   3  175.88   12.00
  -4   1   3  196.38    9.40
  -4   1   3  170.38    9.10
  -4   1   3  180.28    8.10
  -4   1   3  184.08    9.80
  -4  -1   3  164.88    8.40
   4  -1  -3  190.48   10.40
  -4  -1   3  177.68    9.00
  -4  -1   3  161.58    8.40
  -4  -1   3  187.28   12.40
  -4   1   2  196.18    9.50
  -4   1   2  200.18   12.50
  -4   1   2  191.88    7.70
  -4   1   2  199.58   10.10
  -4  -1   2  182.48    8.40
  -4  -1   2  176.88   11.90
  -4  -1   2  191.08    9.60
  -4  -1   2  185.98    8.80
  -4  -1   2  189.48    8.90
  -4   1   1  177.08    9.80
  -4   1   1  188.28   10.20
  -4   1   1  171.18   12.00
  -4   1   1  188.58    8.50
  -4  -1   1  188.28    9.30
  -4  -1   1  183.28    7.40
  -4  -1   1  178.18    8.00
  -4  -1   1  167.88    8.60
  -4  -1   1  184.28   11.60
  -4   1   0  429.56   19.70
  -4   1   0  450.35   19.50
  -4   1   0  455.95   17.00
  -4  -1   0  460.45   17.50
  -4  -1   0  455.85   20.70
  -4  -1   0  436.86   16.80
  -4  -1   0  483.85   19.50
  -4   1  -1   35.90    5.30
  -4  -1  -1   40.70    2.50
  -4  -1  -1   50.59    6.10
  -4  -1  -1   49.70    5.60
  -4  -1  -1   45.00    4.80
  -4   1  -2 4798.02  163.78
  -4   1  -2 4662.13  163.68
  -4   1  -2 4661.83  164.58
  -4  -1  -2 4533.35  152.98
  -4  -1  -2 4696.63  166.08
  -4  -1  -2 4669.23  167.88
  -4  -1  -2 4537.15  163.88
   4   1   3    9.70    3.00
  -4   1  -3    4.30    2.30
  -4   1  -3    6.20    1.30
  -4  -1  -3    5.30    3.50
   4  -1   3    8.20    1.60
  -4  -1  -3    8.80    3.80
  -4  -1  -3    7.70    1.60
  -4  -1  -3    9.30    3.40
  -4   1  -4  219.28   11.10
  -4   1  -4  220.58    9.10
   4   1   4  209.28   10.70
  -4  -1  -4  206.38   11.00
  -4  -1  -4  229.68   12.00
  -4  -1  -4  183.88   12.40
  -4  -1  -4  199.38    9.40
   4  -1   4  201.88    8.80
  -4   1  -5   27.80    3.20
  -4   1  -5   23.60    4.50
   4   1   5   22.10    4.30
  -4  -1  -5   19.30    3.20
  -4  -1  -5   21.40    5.00
   4  -1   5   23.50    3.10
  -4  -1  -5   21.40    5.10
   4   1   6  389.56   17.40
  -4   1  -6  366.86   19.10
  -4   1  -6  403.86   17.00
  -4  -1  -6  413.06   18.10
   4  -1   6  363.16   15.80
  -4  -1  -6  390.66   17.80
  -4  -1  -6  373.76   19.80
  -4   1  -7  577.24   23.30
   4   1   7  519.65   22.70
  -4   1  -7  522.85   25.50
  -4  -1  -7  487.65   23.60
   4  -1   7  529.35   21.30
  -4  -1  -7  542.15   26.20
  -4   1  -8  575.54   28.50
  -4   1  -8  623.94   26.10
   4   1   8  545.75   24.40
  -4  -1  -8  574.54   28.70
   4  -1   8  552.04   23.20
  -4  -1  -8  559.24   26.60
   4   1   9  395.16   18.90
  -4   1  -9  358.76   22.40
  -4  -1  -9  400.46   21.60
   4  -1   9  358.86   17.40
  -4   1 -10 1214.68   55.19
   4   1  10 1290.07   48.30
  -4  -1 -10 1175.48   53.29
   4  -1  10 1261.47   47.00
   4   1  11   78.29    9.80
  -4   1 -11   50.69   11.40
  -4  -1 -11   44.50   10.00
   4  -1  11   44.70    7.80
   4   1  12   80.19   10.90
  -4   1 -12   68.19   13.40
   4  -1  12   78.99    9.70
  -4  -1 -12   57.79   12.00
  -4   1 -13   28.30   12.40
   4   1  13   46.10   10.30
  -4  -1 -13   72.29   14.70
   4  -1  13   50.49    9.40
  -4   1 -14  655.53   41.40
   4   1  14  629.84   31.20
  -4  -1 -14  596.94   39.10
   4  -1  14  608.84   29.90
  -4   1 -15   81.49   19.70
   4   1  15   92.59   13.50
  -4  -1 -15   73.29   17.90
   4  -1  15   84.29   12.30
   4   1  16  139.09   17.00
  -4   1 -16  126.19   23.10
  -4  -1 -16  119.39   22.50
  -4   1 -17    6.00   17.50
  -4  -1 -17   -2.40   15.10
  -4   1 -18    8.50   20.30
  -4  -1 -18   37.50   21.50
  -4   2  18   73.19   14.50
  -4  -2  18   75.89   14.60
  -4   2  17  161.08   17.50
  -4  -2  17  138.79   16.80
  -4   2  16  497.15   27.80
  -4  -2  16  495.35   28.20
  -4   2  15  121.19   14.40
  -4  -2  15   90.79   12.80
  -4   2  14    3.70    7.50
  -4  -2  14    5.00    7.20
  -4   2  13   16.10    7.10
  -4  -2  13   22.50    7.70
  -4   2  12 1025.60   42.70
  -4  -2  12 1061.29   43.00
  -4   2  11   72.19    9.20
  -4  -2  11   62.29    8.50
  -4   2  10   35.70    7.10
  -4   2  10   37.30    8.20
   4   2 -10   39.50   10.70
  -4  -2  10   52.09    4.90
  -4  -2  10   45.00    7.40
   4  -2 -10   26.00    7.60
   4   2  -9  141.19   17.20
  -4   2   9  152.38   14.50
  -4   2   9  129.09   10.30
  -4  -2   9  147.29   10.10
  -4  -2   9  139.39    7.80
   4  -2  -9  121.29   13.00
  -4  -2   9  138.59   10.70
  -4   2   8    6.50    4.40
   4   2  -8   -0.70    6.00
  -4   2   8    5.10    5.40
  -4  -2   8   11.20    3.50
  -4  -2   8    3.00    3.00
   4  -2  -8    4.40    4.40
  -4  -2   8   11.00    4.70
  -4   2   7  154.48   14.40
  -4   2   7  131.79    9.20
   4   2  -7  119.19   14.00
  -4  -2   7  119.49    9.10
  -4  -2   7  120.69    7.10
   4  -2  -7  115.09   10.90
  -4  -2   7  110.39    8.30
  -4   2   6  912.51   41.50
   4   2  -6  953.30   43.20
  -4   2   6  957.60   35.50
   4  -2  -6  940.31   38.80
  -4  -2   6  937.51   35.50
  -4  -2   6  896.61   33.00
  -4  -2   6  982.80   37.00
  -4   2   5  141.49   13.90
  -4   2   5  148.09    8.90
   4   2  -5  175.58   14.20
  -4   2   5  169.08    8.80
   4  -2  -5  154.78   10.30
  -4  -2   5  151.18    8.70
  -4  -2   5  152.68    9.20
  -4  -2   5  153.78    8.00
  -4   2   4 2512.95   85.89
  -4   2   4 2478.05   96.29
   4   2  -4 2540.95   96.69
  -4   2   4 2494.05   90.99
  -4  -2   4 2526.95   83.49
  -4  -2   4 2442.56   86.29
   4  -2  -4 2588.14   91.99
  -4  -2   4 2457.15   90.69
  -4   2   3   27.80    3.60
  -4   2   3   21.20    3.70
  -4   2   3   21.80    7.10
  -4   2   3   15.90    3.10
   4   2  -3   20.20    6.00
  -4  -2   3   22.90    3.60
   4  -2  -3   18.80    3.40
  -4  -2   3   19.70    2.90
  -4  -2   3   17.30    5.80
  -4  -2   3   20.50    3.70
  -4   2   2 1480.75   52.39
  -4   2   2 1420.56   49.00
  -4   2   2 1423.06   58.49
   4   2  -2 1393.06   57.09
  -4   2   2 1361.46   53.39
  -4  -2   2 1466.35   48.80
  -4  -2   2 1386.66   49.99
  -4  -2   2 1382.76   51.89
  -4  -2   2 1532.45   58.09
  -4   2   1   32.20    4.70
  -4   2   1   33.00    2.70
  -4   2   1   31.30    3.00
  -4   2   1   30.10    7.30
  -4  -2   1   30.90    2.90
  -4  -2   1   30.10    6.90
  -4  -2   1   27.80    3.80
  -4  -2   1   28.50    3.80
   4  -2  -1   22.40    4.20
  -4  -2   1   27.60    3.90
  -4   2   0 1241.18   44.00
  -4   2   0 1166.98   49.20
  -4   2   0 1200.68   46.10
  -4  -2   0 1266.97   45.80
  -4  -2   0 1209.98   50.19
  -4  -2   0 1197.38   43.90
   4  -2   0 1165.38   42.30
  -4  -2   0 1224.38   41.90
  -4   2  -1    2.80    4.20
  -4   2  -1    5.50    3.90
  -4   2  -1   -0.50    1.30
  -4  -2  -1    0.10    2.70
  -4  -2  -1    2.20    3.20
  -4  -2  -1   10.80    5.70
  -4  -2  -1    0.40    1.20
   4  -2   1   -0.50    1.70
  -4   2  -2 1261.47   44.90
  -4   2  -2 1210.08   48.60
  -4   2  -2 1185.18   48.40
  -4  -2  -2 1323.57   45.10
  -4  -2  -2 1241.68   51.49
  -4  -2  -2 1231.88   45.20
   4  -2   2 1251.07   42.60
  -4  -2  -2 1235.38   47.30
  -4  -2  -2 1212.18   43.10
   4   2   3  610.54   24.40
  -4   2  -3  616.64   22.30
  -4   2  -3  553.64   25.70
  -4  -2  -3  562.54   22.60
   4  -2   3  587.24   21.30
  -4  -2  -3  584.04   28.40
  -4  -2  -3  619.54   22.70
  -4  -2  -3  581.04   24.50
  -4   2  -4   21.20    5.00
   4   2   4   17.20    4.70
  -4   2  -4   19.80    2.50
  -4  -2  -4   18.60    2.80
   4  -2   4   18.50    2.80
  -4  -2  -4   22.90    6.60
  -4  -2  -4   17.20    3.90
  -4  -2  -4   11.90    4.40
  -4   2  -5  612.14   23.80
   4   2   5  621.04   25.50
  -4   2  -5  562.74   27.50
   4  -2   5  583.94   22.60
  -4  -2  -5  625.14   29.70
  -4  -2  -5  612.74   23.70
  -4  -2  -5  634.14   24.60
  -4   2  -6 3324.77  111.59
   4   2   6 3128.19  107.99
  -4   2  -6 2909.91  115.69
  -4  -2  -6 3092.09  104.09
   4  -2   6 3021.80  105.29
  -4  -2  -6 3067.99  117.29
  -4  -2  -6 3033.80  112.29
   4   2   7   13.60    5.20
  -4   2  -7   16.70    3.80
  -4   2  -7   24.90    6.50
  -4  -2  -7    6.70    5.10
  -4  -2  -7    5.70    3.80
  -4  -2  -7    7.60    6.60
   4  -2   7   10.20    3.60
   4   2   8   27.50    6.70
  -4   2  -8   29.20    7.90
   4  -2   8   39.50    5.50
  -4  -2  -8   43.50    7.30
  -4  -2  -8   35.10    6.50
   4   2   9  165.98   12.70
  -4   2  -9  152.08   16.90
  -4  -2  -9  159.18   13.00
   4  -2   9  152.28   10.20
  -4   2 -10  112.29   15.50
   4   2  10  133.69   12.70
  -4  -2 -10   94.99   12.30
   4  -2  10  135.79   10.80
   4   2  11  389.86   21.10
  -4   2 -11  345.07   26.20
   4  -2  11  357.86   18.40
  -4  -2 -11  333.37   23.10
  -4   2 -12  132.89   19.00
   4   2  12  114.39   13.10
   4  -2  12  120.79   11.80
  -4  -2 -12  104.39   15.10
   4   2  13  131.39   14.60
  -4   2 -13   99.29   17.90
  -4  -2 -13  107.09   17.00
   4  -2  13  129.89   13.00
   4   2  14  293.97   21.40
  -4   2 -14  308.17   31.10
  -4  -2 -14  242.88   26.60
   4  -2  14  349.67   20.20
  -4   2 -15    4.70   13.40
   4   2  15    4.80   10.00
  -4  -2 -15   -2.90   11.30
   4  -2  15  -12.30    7.50
  -4   2 -16  218.48   30.00
   4   2  16  246.68   22.10
  -4  -2 -16  169.98   25.60
  -4   2 -17   80.79   22.90
  -4  -2 -17   77.39   22.10
  -4  -2 -18  155.48   28.00
  -4   3  18   19.20   11.50
  -4  -3  18   -3.10   10.60
  -4   3  17    0.60   10.00
  -4  -3  17    3.30    9.50
  -4   3  16  305.17   21.70
  -4  -3  16  290.67   21.80
  -4   3  15   59.09   11.50
  -4  -3  15   56.19   11.70
  -4   3  14   13.40    8.50
  -4  -3  14   14.30    8.10
  -4   3  13  240.18   17.00
  -4  -3  13  226.58   16.50
  -4   3  12   15.00    7.40
  -4  -3  12   26.40    7.60
  -4   3  11   65.09    9.80
  -4  -3  11   60.89    9.10
  -4   3  10  408.06   20.70
  -4  -3  10  409.46   21.00
  -4  -3  10  408.16   17.20
  -4   3   9   21.00    7.70
   4   3  -9   21.50    9.00
  -4   3   9   22.30    6.00
  -4  -3   9   23.80    6.20
  -4  -3   9   24.40    4.60
   4  -3  -9   16.10    6.10
  -4  -3   9   20.30    4.30
   4   3  -8 2751.12  111.59
  -4   3   8 2738.33  108.49
  -4   3   8 2693.13   97.19
   4  -3  -8 2688.23  104.49
  -4  -3   8 2875.31  101.69
  -4  -3   8 2793.72   92.49
  -4  -3   8 2751.12   97.59
   4   3  -7    8.10    7.20
  -4   3   7   23.40    4.20
  -4   3   7    4.30    6.40
  -4   3   7   35.10    6.10
  -4  -3   7   30.70    4.50
  -4  -3   7   19.30    5.20
  -4  -3   7   22.80    4.10
   4  -3  -7   32.60    6.20
  -4   3   6  147.69    9.90
  -4   3   6  158.68    8.20
   4   3  -6  130.79   15.80
  -4   3   6  119.99   14.70
  -4  -3   6  123.59    8.30
   4  -3  -6  126.89   10.10
  -4  -3   6  136.29    8.20
  -4  -3   6  134.79    9.80
  -4   3   5   -4.10    5.80
  -4   3   5    8.80    3.10
   4   3  -5   11.70    6.70
  -4   3   5   14.00    4.30
   4  -3  -5    4.80    3.10
  -4  -3   5    5.80    3.10
  -4  -3   5    9.10    4.00
  -4  -3   5    7.40    2.40
  -4   3   4  739.73   28.60
  -4   3   4  728.83   29.30
  -4   3   4  732.83   37.30
   4   3  -4  760.82   36.80
  -4  -3   4  742.93   29.10
  -4  -3   4  740.13   27.40
  -4  -3   4  778.02   29.40
   4  -3  -4  751.42   30.20
   4   3  -3  126.69   13.80
  -4   3   3  107.19    7.40
  -4   3   3  102.59    7.30
  -4   3   3   86.09   12.80
   4  -3  -3  106.29    7.10
  -4  -3   3  108.79    6.50
  -4  -3   3  102.09    7.80
  -4  -3   3   94.79    6.90
  -4   3   2 1005.80   46.20
  -4   3   2  972.00   37.70
  -4   3   2  990.20   37.10
  -4   3   2  999.00   35.50
   4   3  -2  958.10   44.10
  -4  -3   2  990.80   36.90
  -4  -3   2  959.10   35.00
  -4  -3   2  934.41   36.40
  -4  -3   2 1056.29   45.30
  -4   3   1  173.28    8.60
  -4   3   1  157.18   16.80
  -4   3   1  183.68    8.90
  -4   3   1  179.68   10.10
   4  -3  -1  178.68   11.20
  -4  -3   1  190.58    9.40
  -4  -3   1  188.08   10.40
  -4  -3   1  177.28    9.10
  -4  -3   1  197.48   17.60
  -4  -3   1  185.28    8.70
  -4   3   0 1071.09   39.40
  -4   3   0 1076.39   37.10
  -4   3   0  965.60   46.60
  -4   3   0 1160.58   41.40
  -4  -3   0 1064.19   40.20
   4  -3   0 1012.60   38.90
  -4  -3   0 1094.19   48.20
  -4  -3   0 1012.10   39.20
  -4  -3   0 1062.59   37.50
  -4   3  -1  233.28   17.30
  -4   3  -1  230.68   10.70
  -4   3  -1  246.48    9.90
   4  -3   1  237.48   11.30
  -4  -3  -1  242.08   11.30
  -4  -3  -1  240.88   10.70
  -4  -3  -1  283.17   20.30
  -4  -3  -1  242.98   12.20
  -4   3  -2 2198.78   71.19
   4   3   2 2163.38   76.69
  -4   3  -2 2038.80   82.89
  -4   3  -2 2112.39   71.39
  -4   3  -2 2141.39   76.49
   4  -3   2 2070.19   73.19
  -4  -3  -2 2129.09   71.89
  -4  -3  -2 2115.79   76.79
  -4  -3  -2 2183.88   86.39
  -4  -3  -2 2073.59   78.19
  -4   3  -3   30.90    7.20
   4   3   3   31.90    6.40
  -4   3  -3   32.60    3.30
   4  -3   3   21.30    3.50
  -4  -3  -3   26.20    3.50
  -4  -3  -3   26.40    4.30
  -4  -3  -3   27.30    4.40
  -4  -3  -3   31.20    9.30
  -4   3  -4  516.65   27.70
  -4   3  -4  592.04   22.20
   4   3   4  534.85   24.80
   4  -3   4  554.04   21.60
  -4  -3  -4  552.94   23.60
  -4  -3  -4  575.54   21.80
  -4  -3  -4  542.65   22.50
  -4  -3  -4  570.64   31.70
  -4   3  -5    8.20    2.50
  -4   3  -5    4.30    5.40
   4   3   5    4.40    5.00
  -4  -3  -5    1.10    2.50
   4  -3   5    7.90    3.10
  -4  -3  -5   -2.00    6.80
  -4  -3  -5    4.80    3.70
  -4   3  -6  138.39    8.20
  -4   3  -6  117.89   13.60
   4   3   6  114.49   11.30
  -4  -3  -6  124.89    8.80
   4  -3   6  129.09    8.40
  -4  -3  -6  112.59    8.70
  -4  -3  -6  117.79   15.50
  -4   3  -7  502.15   29.60
   4   3   7  581.54   26.00
  -4  -3  -7  568.44   25.00
   4  -3   7  521.05   22.50
  -4  -3  -7  570.74   22.90
   4   3   8   21.60    6.90
  -4   3  -8    1.90    6.50
  -4  -3  -8   10.50    4.80
  -4  -3  -8    7.80    5.70
   4  -3   8    4.90    4.20
  -4   3  -9  163.88   18.90
   4   3   9  240.88   16.00
   4  -3   9  211.68   12.90
  -4  -3  -9  217.48   14.00
  -4  -3  -9  236.68   15.70
   4   3  10 1096.89   44.30
  -4   3 -10 1038.20   52.19
   4  -3  10 1049.89   41.20
  -4  -3 -10 1006.50   46.30
   4   3  11   28.90    8.90
  -4   3 -11    9.20    9.60
  -4  -3 -11    8.60    7.40
   4  -3  11   20.90    6.60
   4   3  12   10.40    8.80
  -4   3 -12   27.20   12.50
   4  -3  12   16.90    6.90
  -4  -3 -12   16.00    9.60
  -4   3 -13  155.58   22.20
   4   3  13  133.59   15.40
   4  -3  13   95.39   12.00
  -4  -3 -13  156.48   19.20
   4   3  14   70.69   13.30
  -4   3 -14   76.39   18.60
   4  -3  14   99.59   12.60
  -4  -3 -14   59.69   14.80
  -4   3 -15  219.48   29.80
   4   3  15  238.68   21.80
   4  -3  15  263.97   19.20
  -4  -3 -15  180.98   24.40
  -4   3 -16   -8.30   16.10
   4   3  16  -16.80   10.60
  -4  -3 -16   13.00   14.90
  -4   3 -17   -1.50   18.40
   4   3  17   34.50   13.90
  -4  -3 -17   43.90   19.00
  -4   4  17  132.49   17.00
  -4  -4  17  150.18   18.30
  -4   4  16   11.50   10.40
  -4  -4  16   16.20   10.00
  -4   4  15    0.00    8.10
  -4  -4  15    1.60    8.40
  -4   4  14   97.59   13.20
  -4  -4  14   62.99   11.20
  -4   4  13   43.40   10.00
  -4  -4  13   36.10    9.40
  -4   4  12  857.61   38.00
  -4  -4  12  882.01   38.70
  -4   4  11  366.56   20.80
  -4  -4  11  332.27   20.50
  -4  -4  11  392.06   17.10
  -4   4  10   40.10    8.00
  -4  -4  10   31.30    5.70
  -4  -4  10   24.60    7.10
  -4   4   9  391.86   17.20
  -4   4   9  361.16   25.90
  -4   4   9  350.16   19.70
  -4  -4   9  400.56   17.00
  -4  -4   9  355.16   20.00
  -4   4   8  167.48   12.10
   4   4  -8  175.38   20.70
  -4   4   8  135.99   18.10
  -4   4   8  183.68    9.90
  -4  -4   8  167.88   12.50
  -4  -4   8  175.38   10.80
  -4  -4   8  170.48   10.20
  -4   4   7  412.46   18.20
  -4   4   7  392.26   27.60
   4   4  -7  390.46   28.40
  -4   4   7  431.86   20.70
  -4  -4   7  461.25   21.10
  -4  -4   7  437.26   19.60
   4  -4  -7  415.46   21.50
  -4  -4   7  455.95   18.50
  -4   4   6 1042.00   39.50
   4   4  -6  994.30   49.80
  -4   4   6  968.60   49.00
  -4   4   6 1024.90   38.60
   4  -4  -6 1000.20   41.20
  -4  -4   6  996.20   39.40
  -4  -4   6 1010.60   39.80
  -4   4   5  512.05   31.80
  -4   4   5  533.05   22.60
  -4   4   5  533.25   21.40
   4   4  -5  527.55   31.20
  -4  -4   5  482.25   22.80
  -4  -4   5  491.85   21.80
   4  -4  -5  552.24   23.40
  -4   4   4 2684.13   95.79
  -4   4   4 2713.73  111.29
   4   4  -4 2828.52  110.69
  -4   4   4 2759.92   99.79
  -4  -4   4 2844.52   96.89
  -4  -4   4 2626.14   99.69
  -4  -4   4 2811.22   92.79
   4  -4  -4 2754.92  100.79
   4   4  -3   10.70    7.20
  -4   4   3   10.20    4.10
  -4   4   3   -2.90    7.60
  -4   4   3    7.60    3.30
  -4  -4   3    5.70    3.30
  -4  -4   3    2.70    2.10
   4  -4  -3    4.20    2.60
  -4  -4   3    4.10    4.00
   4   4  -2  980.20   47.20
  -4   4   2  947.41   48.80
  -4   4   2 1024.00   37.10
  -4   4   2  985.00   38.10
  -4  -4   2  992.40   37.90
   4  -4  -2 1029.50   38.10
  -4  -4   2  989.90   36.00
  -4  -4   2  974.80   38.10
  -4   4   1  209.48   10.30
   4   4  -1  217.18   20.30
  -4   4   1  211.78   21.50
  -4   4   1  199.98   11.20
  -4   4   1  197.98   10.70
   4  -4  -1  200.98   13.00
  -4  -4   1  190.78   10.20
  -4  -4   1  201.48   12.00
  -4  -4   1  218.18   10.10
  -4  -4   1  190.88   10.40
  -4   4   0  509.75   30.90
   4   4   0  558.84   30.30
  -4   4   0  516.25   20.90
  -4   4   0  536.05   21.50
  -4  -4   0  509.55   31.20
  -4  -4   0  518.75   21.20
  -4  -4   0  562.44   21.10
   4  -4   0  479.75   22.60
  -4  -4   0  530.35   21.50
   4   4   1  389.06   20.90
  -4   4  -1  402.56   16.70
  -4   4  -1  385.96   25.90
  -4   4  -1  394.66   16.70
  -4   4  -1  400.36   17.00
  -4  -4  -1  449.06   28.40
  -4  -4  -1  401.56   17.10
  -4  -4  -1  402.26   16.90
  -4  -4  -1  406.36   17.50
  -4  -4  -1  391.86   16.90
   4  -4   1  374.76   18.00
  -4   4  -2  450.75   17.40
   4   4   2  441.76   22.20
  -4   4  -2  377.56   25.40
  -4   4  -2  415.36   17.00
   4  -4   2  439.66   18.40
  -4  -4  -2  394.96   17.10
  -4  -4  -2  369.36   17.30
  -4  -4  -2  452.75   29.40
  -4  -4  -2  382.96   17.70
  -4   4  -3   10.70    7.20
   4   4   3    6.30    5.90
  -4   4  -3    6.20    2.30
  -4   4  -3    8.30    3.40
  -4  -4  -3    5.70    3.50
   4  -4   3    2.40    3.50
  -4  -4  -3    7.90    3.40
  -4  -4  -3   14.20    8.60
  -4  -4  -3    4.10    2.50
   4   4   4  280.97   17.40
  -4   4  -4  297.37   13.20
  -4   4  -4  275.67   12.70
  -4   4  -4  286.17   20.80
  -4  -4  -4  268.07   13.10
  -4  -4  -4  318.47   25.90
  -4  -4  -4  285.87   13.90
  -4  -4  -4  289.27   13.70
   4  -4   4  265.17   13.50
  -4   4  -5  387.56   16.50
   4   4   5  398.96   21.60
  -4   4  -5  358.56   24.70
  -4   4  -5  404.76   17.80
   4  -4   5  390.66   18.00
  -4  -4  -5  407.26   17.40
  -4  -4  -5  431.66   18.60
  -4  -4  -5  449.86   31.00
  -4   4  -6 1509.85   64.69
   4   4   6 1493.15   56.99
  -4   4  -6 1423.66   51.19
   4  -4   6 1430.66   52.99
  -4  -4  -6 1404.56   55.89
  -4  -4  -6 1495.25   51.49
  -4   4  -7  459.45   19.10
  -4   4  -7  450.65   29.20
   4   4   7  460.05   24.60
  -4  -4  -7  493.05   22.80
   4  -4   7  506.55   21.50
  -4  -4  -7  476.15   20.30
   4   4   8  148.49   14.70
  -4   4  -8  136.59   17.70
  -4   4  -8  134.79    8.80
  -4  -4  -8  143.89   11.80
   4  -4   8  151.08   10.60
  -4  -4  -8  141.79   10.10
  -4   4  -9   -3.60    8.40
   4   4   9    2.10    7.10
  -4  -4  -9    4.50    5.40
   4  -4   9   -0.70    4.60
  -4   4 -10    6.00    9.90
   4   4  10   -0.60    7.60
  -4  -4 -10    7.90    6.10
   4  -4  10    4.40    5.40
  -4   4 -11  517.05   36.10
   4   4  11  512.65   27.60
   4  -4  11  492.25   24.50
  -4  -4 -11  486.25   28.80
  -4   4 -12   12.90   13.30
   4   4  12   39.60   10.70
   4  -4  12   34.90    8.50
  -4  -4 -12    9.70    9.10
   4   4  13  150.28   17.40
  -4   4 -13  149.69   24.70
  -4  -4 -13  173.78   20.40
   4  -4  13  160.68   15.20
   4   4  14  129.49   17.00
  -4   4 -14  113.69   23.60
   4  -4  14  119.59   14.70
  -4  -4 -14   85.99   17.20
   4   4  15    5.80   11.20
  -4   4 -15  -12.30   15.30
   4  -4  15    9.20    8.90
  -4  -4 -15  -10.60   11.20
  -4   4 -16   -0.10   18.70
   4   4  16   39.40   14.10
  -4  -4 -16   38.70   17.00
   4   4  17    7.60   14.00
  -4   4 -17   25.50   22.20
  -4   5  17   14.30   11.60
  -4  -5  17    4.00   10.80
  -4   5  16   82.49   14.50
  -4  -5  16   84.19   14.50
  -4   5  15  257.77   19.60
  -4  -5  15  221.88   21.10
  -4   5  14   -0.40    9.00
  -4  -5  14   24.00    9.90
  -4   5  13  205.68   18.20
  -4  -5  13  202.08   18.50
  -4   5  12    3.80    7.40
  -4  -5  12    5.70    7.30
  -4   5  11  269.47   18.60
  -4  -5  11  297.57   19.30
  -4  -5  11  298.87   15.40
  -4   5  10  320.37   19.50
  -4  -5  10  346.87   16.90
  -4  -5  10  315.47   19.80
  -4   5   9  757.32   34.30
  -4  -5   9  781.72   30.90
  -4  -5   9  815.62   35.20
  -4   5   8 1018.40   52.99
  -4   5   8 1010.60   42.10
  -4  -5   8 1088.89   43.30
  -4   5   7  554.64   24.90
  -4   5   7  494.75   33.60
  -4  -5   7  505.45   24.90
  -4  -5   7  521.95   23.10
  -4   5   6  308.47   25.90
  -4   5   6  297.97   16.60
   4   5  -6  302.67   25.40
  -4  -5   6  293.27   17.30
  -4  -5   6  304.57   15.00
  -4   5   5   42.00    4.30
  -4   5   5   25.00   11.10
  -4   5   5   54.09    7.80
   4   5  -5   31.70   11.30
  -4  -5   5   46.80    5.60
  -4  -5   5   39.10    7.40
  -4   5   4  278.47   27.00
   4   5  -4  326.47   25.30
  -4   5   4  277.87   15.60
  -4  -5   4  312.47   16.40
   4  -5  -4  262.47   14.60
  -4  -5   4  297.27   14.10
  -4   5   3 1586.04   76.39
  -4   5   3 1696.93   61.89
   4   5  -3 1704.43   75.69
   4  -5  -3 1665.63   63.59
  -4  -5   3 1663.63   62.89
  -4  -5   3 1804.92   63.49
  -4   5   2 1619.34   58.39
   4   5  -2 1506.55   71.09
  -4   5   2 1615.94   73.99
   4  -5  -2 1607.64   59.89
  -4  -5   2 1587.34   59.69
  -4  -5   2 1627.04   59.69
  -4   5   1  832.52   32.40
   4   5  -1  809.32   43.30
  -4   5   1  698.43   43.70
  -4  -5   1  813.82   32.20
  -4  -5   1  839.32   32.20
  -4  -5   1  790.02   33.60
  -4  -5   1  859.81   31.20
  -4   5   0 1213.38   45.20
  -4   5   0 1190.68   43.90
  -4   5   0 1200.38   44.80
   4   5   0 1205.38   49.30
  -4   5   0 1146.29   57.49
   4   5   0 1182.08   55.99
  -4  -5   0 1146.79   42.50
  -4  -5   0 1176.48   45.10
  -4  -5   0 1103.19   44.60
  -4  -5   0 1192.08   44.50
   4  -5   0 1171.48   46.20
  -4   5  -1   12.30    3.00
   4   5   1    4.00    7.90
   4   5   1    3.90    6.20
  -4   5  -1   13.90    9.40
  -4   5  -1   10.70    4.80
  -4  -5  -1   11.30    4.20
  -4  -5  -1    1.20    2.20
  -4  -5  -1   20.50    4.20
   4  -5   1    4.00    4.90
  -4  -5  -1   10.70    3.20
  -4   5  -2 1817.92   64.49
  -4   5  -2 1783.12   62.09
  -4   5  -2 1717.13   76.99
   4   5   2 1627.34   66.89
  -4  -5  -2 1747.03   64.39
  -4  -5  -2 1706.13   64.69
  -4  -5  -2 1764.42   60.79
   4  -5   2 1676.63   63.49
   4   5   3 1285.97   51.79
  -4   5  -3 1250.87   59.79
  -4   5  -3 1267.67   46.20
  -4  -5  -3 1238.38   45.20
  -4  -5  -3 1262.57   47.40
  -4  -5  -3 1290.67   48.50
   4  -5   3 1206.78   47.50
  -4   5  -4  451.85   30.60
   4   5   4  476.45   25.50
  -4   5  -4  484.35   20.60
  -4  -5  -4  469.25   21.10
   4  -5   4  482.85   21.80
  -4  -5  -4  501.05   20.50
  -4  -5  -4  466.35   20.30
  -4   5  -5  640.24   37.20
   4   5   5  614.14   30.80
  -4   5  -5  630.94   25.70
  -4  -5  -5  612.94   27.10
  -4  -5  -5  638.04   25.40
   4  -5   5  684.33   27.70
   4   5   6  216.38   18.40
  -4   5  -6  218.68   23.60
  -4   5  -6  220.78   12.20
  -4  -5  -6  188.08   12.40
   4  -5   6  211.08   13.10
  -4  -5  -6  205.78   11.70
   4   5   7  123.79   14.40
  -4   5  -7  170.78   21.00
  -4   5  -7  156.18   10.30
   4  -5   7  148.59   11.30
  -4  -5  -7  150.08   10.40
  -4  -5  -7  156.98   11.60
  -4   5  -8  127.59   18.90
   4   5   8   83.99   12.60
  -4  -5  -8  119.99   10.10
   4  -5   8   91.19   10.30
  -4  -5  -8  103.49   11.10
   4   5   9  264.27   19.60
  -4   5  -9  265.27   28.00
   4  -5   9  249.88   15.90
  -4  -5  -9  253.77   17.40
   4   5  10  291.27   21.80
  -4   5 -10  331.97   32.70
  -4  -5 -10  295.07   20.60
   4  -5  10  340.97   19.10
   4   5  11  166.68   18.10
  -4   5 -11  144.79   24.00
  -4  -5 -11  156.08   17.10
   4  -5  11  169.38   15.10
   4   5  12   10.80   10.20
  -4   5 -12   -9.80   12.60
   4  -5  12    3.40    6.90
  -4  -5 -12   11.70    8.90
  -4   5 -13   13.10   15.30
   4   5  13    5.20   10.60
  -4  -5 -13    4.20    9.80
   4  -5  13   -5.90    7.50
  -4   5 -14   40.60   19.80
   4   5  14   19.60   12.60
  -4  -5 -14   27.80   13.80
   4  -5  14   30.70    9.90
   4   5  15  139.49   19.00
  -4   5 -15  167.28   30.30
  -4  -5 -15  122.99   21.20
   4   5  16    6.10   13.60
  -4   5 -16    5.10   20.60
  -4   6  16   33.20   12.90
  -4  -6  16   12.80   11.80
  -4   6  15   11.00   10.50
  -4  -6  15    6.90    9.90
  -4   6  14   -7.50    9.00
  -4  -6  14    0.40    8.70
  -4   6  13  157.58   16.80
  -4  -6  13  142.69   16.60
  -4   6  12  168.38   16.90
  -4  -6  12  177.98   17.80
  -4   6  11  303.47   20.20
  -4  -6  11  301.27   20.80
  -4  -6  11  297.37   16.90
  -4   6  10   14.60    8.20
  -4  -6  10   10.10    7.40
  -4  -6  10   19.10    6.20
  -4   6   9    9.60    7.40
  -4  -6   9    7.70    7.00
  -4   6   8   17.00    7.60
  -4  -6   8   12.20    6.80
  -4   6   7 1233.28   63.79
  -4   6   7 1233.58   50.29
  -4  -6   7 1335.57   51.89
  -4   6   6  274.07   17.00
  -4   6   6  283.67   29.00
  -4  -6   6  257.57   14.30
  -4  -6   6  289.77   17.80
  -4   6   5  810.72   48.30
  -4   6   5  845.22   35.60
  -4  -6   5  861.41   36.60
  -4  -6   5  833.82   34.30
  -4   6   4  637.54   42.70
  -4   6   4  686.43   30.50
  -4  -6   4  703.43   31.40
  -4  -6   4  734.83   29.30
  -4   6   3   35.30    7.40
  -4   6   3   38.60   14.00
  -4  -6   3   40.00    8.20
  -4  -6   3   31.60    4.80
  -4   6   2  752.32   31.50
  -4   6   2  769.92   46.00
   4   6  -2  691.13   36.00
  -4  -6   2  733.13   32.70
  -4  -6   2  756.42   30.40
  -4   6   1  725.63   45.30
   4   6  -1  721.33   36.40
  -4   6   1  776.92   31.30
  -4  -6   1  728.03   30.10
  -4  -6   1  766.52   30.70
  -4  -6   1  701.13   29.10
  -4  -6   1  730.63   29.60
  -4   6   0   66.89   16.50
   4   6   0   73.29   12.60
  -4   6   0   73.59    8.80
  -4  -6   0   70.09    6.90
  -4  -6   0   68.19    7.60
  -4  -6   0   74.29    6.50
   4  -6   0   54.09    9.50
  -4   6  -1 2715.73  120.49
  -4   6  -1 2884.91  100.99
   4   6   1 2777.42  106.59
  -4  -6  -1 2928.11  105.29
  -4  -6  -1 2965.40  104.79
   4  -6   1 2915.31  103.79
  -4  -6  -1 2802.22   97.79
  -4   6  -2  222.68   13.50
   4   6   2  230.68   20.00
  -4   6  -2  215.08   25.20
   4  -6   2  233.58   14.90
  -4  -6  -2  204.58   12.10
  -4  -6  -2  207.88   11.10
  -4  -6  -2  229.18   12.70
  -4   6  -3  202.98   13.20
  -4   6  -3  212.78   25.30
   4   6   3  258.97   18.30
   4  -6   3  216.58   14.60
  -4  -6  -3  209.88   12.30
  -4  -6  -3  202.08   12.10
  -4   6  -4  139.99   11.00
  -4   6  -4  152.68   21.80
   4   6   4  173.68   17.00
  -4  -6  -4  148.29   10.00
   4  -6   4  142.79   12.90
  -4  -6  -4  147.29   10.30
  -4   6  -5  110.99   19.40
   4   6   5  180.08   17.50
  -4   6  -5  123.29   10.80
  -4  -6  -5  150.88   10.30
   4  -6   5  128.39   12.30
  -4  -6  -5  141.19   10.50
  -4   6  -6  518.55   36.40
   4   6   6  538.65   29.00
  -4   6  -6  536.05   23.40
   4  -6   6  556.54   25.60
  -4  -6  -6  503.95   24.70
  -4  -6  -6  523.45   22.70
  -4   6  -7  228.88   13.70
   4   6   7  213.18   19.50
  -4   6  -7  234.48   27.30
  -4  -6  -7  221.48   14.70
   4  -6   7  228.68   15.50
  -4  -6  -7  219.88   13.20
   4   6   8   40.00   11.60
  -4   6  -8   38.30   14.60
   4  -6   8   55.49    9.40
  -4  -6  -8   58.39    9.20
  -4  -6  -8   57.49    8.00
   4   6   9  163.08   18.30
  -4   6  -9  185.88   25.90
   4  -6   9  186.78   16.00
  -4  -6  -9  191.68   15.40
  -4   6 -10   11.30   14.80
   4   6  10   12.40    9.60
  -4  -6 -10    9.00    7.00
   4  -6  10   11.90    7.30
  -4   6 -11   62.59   19.70
   4   6  11   55.69   13.60
  -4  -6 -11   56.79   11.70
   4  -6  11   71.69   11.50
  -4   6 -12   -9.30   14.80
   4   6  12   -5.20   10.50
  -4  -6 -12    3.60    8.70
   4  -6  12    3.60    7.80
   4   6  13   39.10   13.70
  -4   6 -13   -0.10   16.90
  -4  -6 -13   26.10   11.80
   4  -6  13   27.40   10.20
  -4   6 -14   69.49   23.90
   4   6  14   53.69   14.90
  -4  -6 -14   35.40   14.20
   4  -6  14   45.40   12.10
  -4   6 -15   40.50   23.40
   4   6  15   -0.50   13.20
  -4   6 -16   20.90   23.90
  -4   7  15  125.19   17.50
  -4  -7  15   97.99   17.10
  -4   7  14    6.50   11.00
  -4  -7  14    0.50    9.80
  -4   7  13   99.59   15.20
  -4  -7  13  109.69   16.00
  -4   7  12    6.10   10.00
  -4  -7  12   38.30   11.30
  -4   7  11  169.98   17.40
  -4  -7  11  173.38   18.10
  -4  -7  11  200.98   15.10
  -4   7  10   -8.90    7.90
  -4  -7  10    4.30    6.50
  -4  -7  10    7.40    8.10
  -4   7   9  429.06   24.30
  -4  -7   9  397.76   24.30
  -4   7   8  116.49   13.80
  -4  -7   8  137.59   14.90
  -4   7   7  347.47   20.40
  -4  -7   7  308.17   20.90
  -4   7   6  121.69   21.50
  -4   7   6   83.09   11.70
  -4  -7   6   63.99   11.10
  -4   7   5  290.87   18.20
  -4   7   5  233.08   28.90
  -4  -7   5  300.17   19.00
  -4   7   4  178.98   14.20
  -4   7   4  149.29   24.50
   4   7  -4  144.69   18.90
  -4  -7   4  182.98   11.30
  -4  -7   4  168.18   15.90
  -4   7   3 2485.75   87.09
   4   7  -3 2317.67   93.49
  -4   7   3 2394.06  108.09
  -4  -7   3 2416.06   88.89
  -4  -7   3 2273.17   88.19
  -4   7   2   68.49   17.80
  -4   7   2   84.89   10.90
   4   7  -2   79.79   14.30
  -4  -7   2  103.39    8.60
  -4  -7   2  102.79   12.50
  -4  -7   2   97.49    8.20
  -4   7   1  438.96   36.10
  -4   7   1  401.46   20.90
   4   7  -1  391.36   26.00
  -4  -7   1  389.66   19.20
  -4  -7   1  403.06   18.00
  -4   7   0   53.79    8.90
  -4   7   0   44.20   15.80
   4   7   0   52.29   11.90
   4  -7   0   44.60    9.90
  -4  -7   0   45.50    7.00
  -4  -7   0   50.89    6.50
  -4  -7   0   51.19    5.90
  -4   7  -1   48.70    8.40
  -4   7  -1   30.60   14.60
   4   7   1   33.30   11.10
  -4  -7  -1   64.69    7.30
  -4  -7  -1   42.30    6.60
   4  -7   1   31.90    9.10
  -4   7  -2  379.46   19.70
  -4   7  -2  353.56   36.00
   4   7   2  364.26   24.30
  -4  -7  -2  353.96   18.20
  -4  -7  -2  346.07   17.70
   4  -7   2  381.56   22.10
  -4   7  -3  343.67   18.80
   4   7   3  408.66   25.20
  -4   7  -3  371.86   36.10
  -4  -7  -3  327.47   17.70
  -4  -7  -3  333.47   17.20
   4  -7   3  339.97   20.60
  -4   7  -4  105.99   20.90
   4   7   4  135.89   17.30
  -4   7  -4  132.39   12.20
  -4  -7  -4  104.89    9.90
   4  -7   4  143.89   14.30
  -4  -7  -4  125.99   11.00
   4   7   5 1295.67   55.19
  -4   7  -5 1260.57   67.29
  -4   7  -5 1278.17   48.30
   4  -7   5 1285.17   51.29
  -4  -7  -5 1178.38   46.30
  -4  -7  -5 1221.68   50.39
  -4   7  -6  154.78   12.80
   4   7   6  150.68   18.00
  -4   7  -6  161.58   25.10
  -4  -7  -6  137.59   11.70
   4  -7   6  154.08   14.80
  -4  -7  -6  124.49   12.00
  -4   7  -7   28.90    7.40
   4   7   7   19.80   10.50
  -4   7  -7   20.60   13.80
  -4  -7  -7   12.40    5.80
   4  -7   7   13.30    7.50
  -4  -7  -7   21.00    6.30
   4   7   8    9.30   10.50
  -4   7  -8    1.20   12.80
  -4  -7  -8   -2.10    5.30
   4  -7   8   -1.60    6.70
  -4   7  -9  177.28   27.70
   4   7   9  218.98   21.80
  -4  -7  -9  190.78   16.40
   4  -7   9  215.68   18.50
  -4   7 -10  125.69   25.30
   4   7  10  167.68   19.60
   4  -7  10  186.28   17.40
  -4  -7 -10  141.89   15.90
  -4   7 -11    8.40   17.20
   4   7  11    9.50   11.20
   4  -7  11    7.90    9.20
  -4  -7 -11   10.70    9.00
   4   7  12   -1.60   12.70
  -4   7 -12   20.70   18.00
  -4  -7 -12    8.20    9.90
   4  -7  12   19.50   10.50
   4   7  13   12.10   13.00
  -4   7 -13   13.40   18.90
   4  -7  13   29.30   11.40
  -4   7 -14   73.49   26.90
   4   7  14   45.00   16.20
   4  -7  14   50.39   14.30
   4   7  15   59.99   18.20
  -4   8  14   23.50   12.70
  -4  -8  14   19.10   12.30
  -4   8  13  119.99   16.90
  -4  -8  13  139.09   19.10
  -4   8  12    8.60   10.70
  -4  -8  12   33.00   11.80
  -4   8  11  436.96   27.60
  -4  -8  11  494.85   30.10
  -4  -8  11  503.05   25.30
  -4   8  10   75.49   13.60
  -4  -8  10   51.19   10.00
  -4  -8  10   46.10   12.00
  -4   8   9   47.10   11.30
  -4  -8   9   41.20   11.40
  -4   8   8  118.99   14.80
   4   8  -8  123.19   20.50
  -4  -8   8  140.19   16.70
  -4   8   7  578.24   30.20
   4   8  -7  592.94   37.30
  -4  -8   7  631.24   32.50
  -4   8   6  295.97   20.20
   4   8  -6  317.17   29.00
  -4  -8   6  344.47   22.20
  -4   8   5  539.85   27.40
   4   8  -5  497.15   33.40
  -4  -8   5  515.65   28.90
   4   8  -4    9.10   10.90
  -4   8   4   25.80    8.70
  -4   8   4    0.10   13.90
  -4  -8   4   46.00   10.40
  -4   8   3  128.59   13.50
   4   8  -3  102.19   16.90
  -4   8   3   89.49   22.00
  -4  -8   3  113.59   13.90
  -4   8   2   21.50   16.20
   4   8  -2   35.60   12.00
  -4   8   2   56.59   10.50
  -4  -8   2   48.40    6.90
  -4   8   1  337.67   38.50
  -4   8   1  326.57   19.50
   4   8  -1  366.46   26.00
  -4  -8   1  298.77   17.10
  -4  -8   1  317.77   17.30
  -4   8   0  238.38   16.50
   4   8   0  231.88   23.20
  -4   8   0  179.58   29.50
  -4  -8   0  219.38   14.10
  -4  -8   0  222.28   13.80
  -4   8  -1 1216.88   71.39
   4   8   1 1315.57   58.39
  -4   8  -1 1300.27   51.69
   4  -8   1 1257.37   55.49
  -4  -8  -1 1334.87   52.29
  -4  -8  -1 1327.37   49.50
  -4   8  -2  334.57   20.00
   4   8   2  349.07   25.60
  -4   8  -2  346.77   38.80
  -4  -8  -2  372.96   18.80
   4  -8   2  339.07   23.00
  -4  -8  -2  398.06   19.70
   4   8   3  -17.40    9.00
  -4   8  -3  -15.50   11.30
  -4   8  -3   -4.60    6.70
  -4  -8  -3   -1.20    5.10
   4  -8   3    3.80    7.70
  -4  -8  -3   -0.30    4.10
  -4   8  -4   17.70    7.40
   4   8   4   -1.70   10.40
  -4   8  -4    9.50   14.00
   4  -8   4    2.80    7.90
  -4  -8  -4    8.20    5.00
  -4  -8  -4    5.10    5.40
  -4   8  -5  292.07   37.30
  -4   8  -5  344.17   20.10
   4   8   5  362.46   25.60
  -4  -8  -5  376.36   20.40
  -4  -8  -5  400.36   19.40
   4  -8   5  312.17   22.30
   4   8   6  104.49   16.70
  -4   8  -6  122.29   25.20
  -4   8  -6  128.69   12.60
  -4  -8  -6   88.19   10.90
   4  -8   6  109.89   14.40
  -4  -8  -6  105.59   11.00
   4   8   7  340.97   25.30
  -4   8  -7  327.77   38.10
  -4  -8  -7  336.37   18.30
   4  -8   7  368.46   23.10
  -4  -8  -7  307.57   20.10
  -4   8  -8  131.89   27.00
   4   8   8   89.79   16.30
   4  -8   8   99.49   14.30
  -4  -8  -8   90.59   12.10
  -4   8  -9   75.89   22.60
   4   8   9   49.10   15.20
   4  -8   9   76.09   12.80
  -4  -8  -9   52.49   10.70
  -4   8 -10   66.09   23.30
   4   8  10   88.59   16.30
   4  -8  10   88.69   14.50
  -4  -8 -10   44.00   11.10
   4   8  11  300.17   27.80
  -4   8 -11  319.17   40.40
   4  -8  11  334.67   24.20
  -4   8 -12   -9.60   19.10
   4   8  12   -4.20   13.70
   4  -8  12   10.20   11.20
   4   8  13  120.89   20.40
  -4   8 -13  117.89   30.90
   4  -8  13  158.18   20.20
   4  -8  14   68.39   16.50
   4   9 -13  276.67   33.40
  -4   9  12   96.49   16.00
   4   9 -12  131.79   25.10
  -4  -9  12  129.29   19.10
  -4   9  11   34.10   12.60
   4   9 -11   55.79   20.10
  -4  -9  11   48.50   11.00
  -4  -9  11   46.30   13.90
   4   9 -10  126.09   23.70
  -4   9  10  138.09   17.30
  -4  -9  10  120.29   17.50
  -4  -9  10  110.49   13.60
  -4   9   9  151.48   17.20
   4   9  -9  146.89   24.10
  -4  -9   9  127.49   17.80
  -4  -9   9  148.09   15.20
  -4   9   8  -13.30    9.00
   4   9  -8   16.70   14.30
  -4  -9   8   -2.40    9.20
  -4   9   7  168.28   17.30
   4   9  -7  148.99   23.20
  -4  -9   7  147.39   18.20
   4   9  -6   39.40   14.70
  -4   9   6   59.79   12.00
  -4  -9   6   35.90   11.20
  -4   9   5    0.00    9.00
   4   9  -5   15.70   13.00
  -4  -9   5   14.60    9.70
   4   9  -4   91.49   17.70
  -4   9   4  121.09   14.80
  -4  -9   4   76.69   13.90
   4   9  -3  557.74   35.20
  -4   9   3  530.25   29.10
  -4  -9   3  638.34   32.50
  -4   9   2  172.98   16.80
   4   9  -2  158.98   21.20
  -4  -9   2  158.58   13.90
   4   9  -1   67.59   15.40
  -4   9   1   65.69   11.90
  -4   9   1   51.09   21.10
  -4  -9   1   45.80    8.70
   4   9   0   -1.40   10.80
  -4   9   0   -9.10   15.30
  -4   9   0    7.10    8.30
  -4  -9   0    2.20    5.70
  -4   9  -1  101.69   25.70
  -4   9  -1   94.69   12.90
   4   9   1  109.99   17.70
  -4  -9  -1  111.59   11.80
   4   9   2   21.20   12.60
  -4   9  -2   30.00    9.60
  -4   9  -2    0.80   16.40
  -4  -9  -2   32.70    7.70
   4  -9   2   24.00   10.90
  -4   9  -3  379.76   21.40
  -4   9  -3  302.97   38.40
   4   9   3  322.67   29.10
   4  -9   3  353.96   24.90
  -4  -9  -3  333.17   19.10
  -4   9  -4  147.29   14.40
   4   9   4  113.89   19.00
  -4   9  -4  137.39   28.40
   4  -9   4  122.89   16.90
  -4  -9  -4  138.69   13.20
  -4   9  -5  171.68   15.20
  -4   9  -5  131.99   28.20
   4   9   5  176.58   21.50
   4  -9   5  143.29   17.80
  -4  -9  -5  136.69   13.40
  -4   9  -6   24.30   19.90
   4   9   6   49.99   14.50
  -4  -9  -6   21.80    7.60
   4  -9   6   25.80   10.80
   4   9   7  288.27   27.30
  -4   9  -7  249.68   37.30
   4  -9   7  292.97   22.90
  -4   9  -8    9.30   19.70
   4   9   8   -9.60   11.20
   4  -9   8   -0.50    9.10
   4   9   9  257.07   26.00
  -4   9  -9  238.38   39.30
   4  -9   9  269.07   24.30
   4   9  10   90.29   18.40
  -4   9 -10   62.29   24.80
   4  -9  10   60.29   14.10
   4   9  11   23.00   15.50
   4  -9  11   27.50   12.70
   4   9  12   24.10   16.20
   4  -9  12   85.89   16.80
   4  10 -11  113.89   23.90
  -4  10  11   84.09   16.30
  -4 -10  11  125.89   16.10
  -4 -10  11  100.29   18.30
   4  10 -10   52.59   20.10
  -4  10  10   61.19   15.00
  -4 -10  10   60.29   12.10
  -4 -10  10   70.79   17.20
   4  10  -9  129.39   23.90
  -4  10   9  130.59   17.80
  -4 -10   9  154.08   16.50
  -4 -10   9  123.99   19.10
   4  10  -8   57.79   20.50
  -4  10   8   41.50   12.90
  -4 -10   8   45.90   14.30
  -4 -10   8   51.59   10.90
  -4  10   7  133.29   16.60
   4  10  -7  126.29   22.60
  -4 -10   7  116.19   14.60
  -4 -10   7  116.49   17.90
   4  10  -6  102.49   21.10
  -4  10   6  126.79   16.50
  -4 -10   6  120.29   17.60
  -4 -10   6   99.69   13.00
   4  10  -5   34.60   15.30
  -4  10   5   28.30   11.30
  -4 -10   5    6.20   10.10
  -4 -10   5   12.00    7.40
   4  10  -4    8.70   13.50
  -4  10   4   15.90    9.90
  -4 -10   4    0.50    9.00
   4  10  -3    8.50   13.10
  -4  10   3    5.50    9.40
  -4 -10   3   12.40    7.20
  -4  10   2   23.20   10.60
   4  10  -2   24.40   13.60
  -4 -10   2    4.90    6.90
   4  10  -1   65.29   17.20
  -4  10   1   91.69   13.20
  -4 -10   1   86.99   11.40
   4  10   0  173.08   23.10
  -4  10   0  235.58   18.40
  -4 -10   0  216.78   15.50
  -4  10  -1  202.28   18.20
   4  10   1  219.88   24.70
  -4 -10  -1  207.18   15.20
  -4  10  -2   49.60   11.70
   4  10   2   76.39   17.70
   4 -10   2   80.29   14.50
  -4 -10  -2   65.09   10.50
   4  10   3   96.09   17.80
  -4  10  -3   82.19   13.20
  -4 -10  -3   84.09   11.50
   4 -10   3   62.49   14.60
  -4  10  -4   29.60   10.40
   4  10   4   16.10   13.00
   4 -10   4   29.10   11.80
  -4 -10  -4   32.40    8.90
   4  10   5  138.69   21.40
   4 -10   5  168.88   20.50
  -4 -10  -5  157.68   15.20
   4  10   6    8.60   13.50
  -4 -10  -6    5.30    7.50
   4 -10   6   -0.10   11.00
   4  10   7   40.00   16.20
   4 -10   7   60.59   15.60
   4  10   8   27.20   15.50
   4 -10   8   41.40   13.70
   4  10   9    1.80   14.20
   4 -10   9   -0.10   11.10
   4  10  10    1.70   15.00
   4 -10  10   25.50   13.70
   4 -10  11  427.36   31.90
   4  11  -9   24.10   19.80
  -4  11   9   -0.20   12.40
  -4 -11   9   14.30   10.20
   4  11  -8   20.30   18.20
  -4  11   8    8.70   12.40
  -4 -11   8    7.20    9.30
  -4 -11   8   -1.90   12.00
   4  11  -7   55.29   20.10
  -4  11   7   67.59   14.50
  -4 -11   7   71.69   16.30
  -4 -11   7   62.69   12.60
  -4  11   6   34.30   12.90
   4  11  -6   40.20   18.30
  -4 -11   6   40.00   11.10
  -4 -11   6   66.39   15.90
  -4  11   5    2.80   10.90
   4  11  -5   46.10   17.80
  -4 -11   5  -15.80   10.70
  -4 -11   5   34.80   10.50
  -4  11   4  191.68   19.70
   4  11  -4  187.28   26.00
  -4 -11   4  175.98   16.70
   4  11  -3  183.68   25.00
  -4  11   3  154.98   17.50
  -4 -11   3  146.89   15.60
   4  11  -2  107.09   21.50
  -4  11   2  114.19   16.00
  -4 -11   2  103.99   13.40
  -4  11   1    1.70   10.10
   4  11  -1    2.40   13.90
  -4 -11   1    5.00    7.20
  -4  11   0   39.00   11.90
   4  11   0   41.00   17.00
  -4 -11   0   65.29   11.10
  -4  11  -1   78.39   13.40
   4  11   1   96.79   20.00
  -4 -11  -1   73.59   11.70
   4  11   2    7.40   13.90
  -4  11  -2   -3.80    9.60
  -4 -11  -2    3.10    7.20
   4  11   3   24.30   15.80
  -4 -11  -3   43.70    9.90
   4 -11   3  -10.10   10.20
   4  11   4  128.59   21.90
  -4 -11  -4  147.69   15.30
   4 -11   4  124.29   20.10
   4  11   5   46.10   17.40
  -4 -11  -5   32.90   10.10
   4 -11   5   35.00   14.20
   4  11   6    1.20   15.70
   4 -11   6    4.20   12.30
   4  11   7  265.57   28.70
   4 -11   7  267.87   27.60
   4  11   8  138.39   23.10
   4 -11   8  156.28   22.50
  -4  12   6   29.40   14.10
  -4  12   5   41.00   14.20
   4  12  -5   19.40   18.30
  -4 -12   5   13.80   10.00
   4  12  -4   19.90   18.30
  -4  12   4    8.30   12.10
  -4 -12   4    5.20    9.00
   4  12  -3    9.90   16.90
  -4  12   3   25.00   12.90
  -4 -12   3   17.10    9.20
   4  12  -2   35.20   17.90
  -4  12   2   24.10   12.70
  -4 -12   2    7.30    8.70
  -4  12   1   15.00   11.70
   4  12  -1   38.70   17.40
  -4 -12   1   15.80    9.10
  -4  12   0  109.69   16.00
   4  12   0  123.99   22.70
  -4 -12   0  118.89   15.10
   4  12   1  164.08   25.00
  -4 -12  -1  173.68   17.40
   4  12   2  -13.20   14.60
  -4 -12  -2   -0.80    8.80
   4  12   3   35.20   17.90
  -4 -12  -3   69.99   12.70
   4  12   4  263.07   30.00
  -4 -12  -4  189.88   18.80
  -5   0  18   62.19   13.70
  -5   0  17    6.70    9.50
  -5   0  16  154.78   16.40
  -5   0  15   -2.10    7.40
  -5   0  14  846.72   37.50
  -5   0  13    3.50    6.40
  -5   0  12  329.77   18.60
  -5   0  11   -1.60    4.60
  -5   0  10 2111.19   81.89
  -5   0  10 2130.49   76.59
  -5   0   9    2.80    4.00
   5   0  -9    4.10    5.30
  -5   0   9   -2.20    3.00
  -5   0   9    1.20    3.80
  -5   0   8 1688.53   56.99
   5   0  -8 1619.84   68.89
  -5   0   8 1718.93   65.79
  -5   0   8 1706.83   60.79
  -5   0   7   -3.30    2.80
   5   0  -7   -5.20    3.70
  -5   0   7   -0.20    3.00
  -5   0   7   -3.60    3.20
  -5   0   6  659.13   28.90
  -5   0   6  679.63   24.70
  -5   0   6  679.03   25.90
   5   0  -6  641.34   30.80
  -5   0   5   -3.30    2.60
  -5   0   5    6.80    2.80
   5   0  -5    0.60    3.40
  -5   0   5    0.20    2.80
  -5   0   4 1341.07   51.39
  -5   0   4 1333.47   47.00
  -5   0   4 1318.17   47.40
  -5   0   4 1458.65   53.19
  -5   0   4 1356.66   52.09
  -5   0   3    1.40    3.10
  -5   0   3    2.30    2.00
  -5   0   3    0.70    2.60
  -5   0   3   -0.70    2.60
  -5   0   3   -3.40    3.00
  -5   0   2 6939.41  252.67
  -5   0   2 6868.21  230.88
  -5   0   2 7502.25  251.47
  -5   0   2 6920.11  250.57
  -5   0   1   -2.30    3.00
  -5   0   1   -1.60    3.10
  -5   0   1   -1.90    2.20
  -5   0   1   -4.70    2.30
  -5   0   0   88.19    7.70
  -5   0   0   79.19    5.20
  -5   0   0   88.19    6.70
  -5   0  -1   10.80    4.20
  -5   0  -1    1.90    3.90
  -5   0  -2   62.19    7.20
  -5   0  -2   60.49    7.00
  -5   0  -3   -2.00    1.00
  -5   0  -3   -4.80    4.30
  -5   0  -3   -6.50    4.00
  -5   0  -4 1092.29   39.60
  -5   0  -4 1017.20   43.60
   5   0   4 1083.49   37.50
  -5   0  -4 1075.99   40.20
  -5   0  -4 1084.89   39.50
  -5   0  -5   -0.20    2.30
   5   0   5    0.10    2.50
  -5   0  -5   -2.90    2.20
  -5   0  -6 2076.59   79.29
   5   0   6 2117.69   74.29
  -5   0  -6 2226.08   79.29
  -5   0  -7    3.70    3.70
   5   0   7   -0.60    3.30
  -5   0  -7   -2.40    3.70
  -5   0  -8 1428.56   53.89
   5   0   8 1296.17   48.60
  -5   0  -8 1253.17   53.49
  -5   0  -9   -0.80    5.20
   5   0   9   -1.20    4.30
   5   0  10   14.00    5.70
  -5   0 -10   18.00    7.40
   5   0  11    8.00    5.90
  -5   0 -11   -5.50    6.20
  -5   0 -12   96.39   15.10
   5   0  12  152.78   13.40
  -5   0 -13    8.40   10.00
  -5   0 -14   28.60   13.00
  -5   0 -15  -16.00   10.50
  -5   0 -16  120.09   22.60
  -5   0 -17    8.30   16.90
  -5   1  18  221.68   21.00
  -5  -1  18  233.18   21.70
  -5   1  17    2.60    9.50
  -5  -1  17   17.40   10.20
  -5   1  16  332.67   21.80
  -5  -1  16  361.46   22.50
  -5   1  15    5.50    7.60
  -5  -1  15   -1.60    7.60
  -5   1  14  398.66   22.80
  -5  -1  14  447.86   24.00
  -5   1  13   20.60    7.00
  -5  -1  13   11.80    6.90
  -5   1  12  331.97   18.80
  -5  -1  12  372.66   19.60
  -5   1  11   98.59   10.30
  -5  -1  11  102.49   10.70
  -5   1  10  939.51   37.10
  -5   1  10  897.81   40.70
  -5  -1  10  913.11   37.10
  -5  -1  10  936.31   38.90
  -5   1   9   99.39   10.90
   5   1  -9   80.49   12.50
  -5   1   9   83.49    8.30
   5  -1  -9   66.49   10.30
  -5  -1   9   78.09    6.20
  -5  -1   9   76.09    8.20
  -5  -1   9   82.59    8.50
  -5   1   8    0.70    3.60
   5   1  -8    7.50    5.80
  -5   1   8    8.80    4.90
  -5  -1   8    4.20    3.20
   5  -1  -8    2.50    4.80
  -5  -1   8    6.00    3.50
  -5  -1   8    7.80    4.40
  -5   1   7   43.50    7.60
   5   1  -7   30.00    7.00
  -5   1   7   51.29    5.90
  -5  -1   7   32.80    4.30
   5  -1  -7   42.50    7.40
  -5  -1   7   30.80    5.20
  -5  -1   7   37.70    5.50
  -5   1   6 4915.81  164.38
   5   1  -6 4740.63  179.38
  -5   1   6 4747.23  177.28
   5  -1  -6 4814.92  177.18
  -5  -1   6 4896.61  159.38
  -5  -1   6 5011.20  174.98
  -5  -1   6 4838.02  164.68
   5   1  -5  232.58   15.60
  -5   1   5  229.48   10.70
  -5   1   5  238.38   11.70
  -5   1   5  218.98   14.30
  -5   1   5  250.07   11.30
  -5  -1   5  191.08   10.10
  -5  -1   5  217.18   11.80
  -5  -1   5  214.48   11.10
   5  -1  -5  268.37   14.40
   5   1  -4 1241.18   50.59
  -5   1   4 1173.28   43.50
  -5   1   4 1250.27   43.40
  -5   1   4 1217.08   46.80
  -5   1   4 1215.58   49.50
  -5   1   4 1310.47   47.80
  -5  -1   4 1227.98   42.90
  -5  -1   4 1264.57   43.90
  -5  -1   4 1275.47   50.29
  -5  -1   4 1205.18   46.80
  -5   1   3   57.99    5.70
  -5   1   3   54.79    4.20
  -5   1   3   47.70    5.50
  -5   1   3   52.29    6.30
  -5   1   3   43.80    6.80
  -5  -1   3   48.80    4.70
  -5  -1   3   65.59    7.90
  -5  -1   3   59.29    5.40
  -5  -1   3   52.79    4.70
  -5  -1   3   53.49    5.60
  -5   1   2   91.49    4.40
  -5   1   2   99.59    6.90
  -5   1   2  112.99    8.80
  -5   1   2   93.69    5.00
  -5   1   2   97.39    9.40
  -5   1   2  105.59    8.40
  -5  -1   2   83.19    6.90
  -5  -1   2   96.89    9.30
  -5  -1   2   95.09    5.50
  -5  -1   2   93.09    7.00
  -5  -1   2   96.19    5.90
  -5   1   1    0.00    1.90
  -5   1   1   -1.00    4.00
  -5   1   1    4.90    3.90
  -5   1   1    0.70    4.00
  -5  -1   1    1.80    1.60
  -5  -1   1    4.90    2.90
  -5  -1   1    3.60    3.90
  -5  -1   1    0.30    3.10
  -5   1   0  376.26   18.70
  -5   1   0  389.76   17.40
  -5   1   0  374.76   18.10
  -5   1   0  428.06   15.60
  -5  -1   0  415.76   19.10
  -5  -1   0  380.86   15.20
  -5  -1   0  415.66   16.70
  -5  -1   0  426.36   18.60
  -5   1  -1   43.20    6.30
  -5  -1  -1   42.00    6.00
  -5  -1  -1   39.70    2.60
  -5  -1  -1   36.60    5.20
  -5  -1  -1   53.79    6.30
  -5   1  -2 3978.90  144.09
  -5  -1  -2 3846.32  130.79
  -5  -1  -2 3874.31  143.39
  -5  -1  -2 4120.69  141.29
  -5  -1  -2 3858.41  138.79
  -5   1  -3  614.04   22.00
  -5   1  -3  593.14   23.20
  -5   1  -3  600.54   27.00
  -5  -1  -3  576.54   26.10
  -5  -1  -3  618.04   24.70
  -5  -1  -3  591.64   23.90
  -5  -1  -3  598.04   22.40
   5   1   4  524.45   21.00
  -5   1  -4  539.05   21.90
  -5   1  -4  533.95   20.10
  -5  -1  -4  521.85   22.20
   5  -1   4  513.95   19.10
  -5  -1  -4  551.04   23.00
  -5  -1  -4  544.55   20.60
  -5  -1  -4  522.35   24.30
   5   1   5  246.78   12.90
  -5   1  -5  276.27   13.90
  -5   1  -5  280.17   11.70
  -5  -1  -5  261.57   12.30
   5  -1   5  272.87   11.10
  -5  -1  -5  223.28   13.80
  -5  -1  -5  268.77   14.60
  -5   1  -6  240.68   14.20
   5   1   6  250.07   13.30
  -5   1  -6  256.57   12.20
  -5  -1  -6  251.07   13.00
  -5  -1  -6  274.27   15.50
  -5  -1  -6  249.38   14.50
   5  -1   6  246.68   11.40
   5   1   7    6.20    4.60
  -5   1  -7   13.50    4.90
  -5   1  -7    9.80    3.50
  -5  -1  -7    8.30    5.10
  -5  -1  -7    3.10    5.30
  -5  -1  -7    4.30    3.80
   5  -1   7   11.60    3.60
  -5   1  -8   17.30    6.20
   5   1   8   20.80    5.80
  -5   1  -8   25.50    5.30
  -5  -1  -8    8.50    5.00
   5  -1   8   20.30    4.60
   5   1   9   22.50    6.50
  -5   1  -9    4.90    6.00
  -5  -1  -9   19.70    6.60
   5  -1   9   24.50    5.30
   5   1  10   56.29    8.90
  -5   1 -10   37.00    9.50
   5  -1  10   46.70    6.90
  -5  -1 -10   75.19   11.10
  -5   1 -11   19.90    8.40
   5   1  11   14.20    6.70
   5  -1  11   17.70    6.30
  -5  -1 -11    9.80    7.40
  -5   1 -12  561.84   33.70
   5   1  12  486.85   25.60
   5  -1  12  571.84   25.40
  -5  -1 -12  479.85   31.10
   5   1  13  127.99   13.70
  -5   1 -13  130.19   18.80
  -5  -1 -13  107.09   17.10
  -5   1 -14    2.80   11.20
  -5  -1 -14    3.40   10.80
  -5   1 -15   54.59   16.50
  -5  -1 -15   42.70   15.10
  -5   1 -16  182.08   26.30
  -5  -1 -16  142.39   24.30
  -5   1 -17  -15.60   15.40
  -5  -1 -17  -15.70   14.80
  -5   2  18    6.40   11.20
  -5  -2  18    8.00   10.70
  -5   2  17   25.40   11.10
  -5  -2  17   29.90   10.00
  -5   2  16   22.90    9.70
  -5  -2  16   17.90    9.60
  -5   2  15  253.07   18.60
  -5  -2  15  269.47   19.00
  -5   2  14  328.77   20.70
  -5  -2  14  346.97   21.20
  -5   2  13   40.00    9.30
  -5  -2  13   30.80    8.40
  -5   2  12   64.59    9.40
  -5  -2  12   68.69    9.60
  -5   2  11  156.48   12.60
  -5  -2  11  162.18   12.50
  -5   2  10 1042.20   41.70
  -5   2  10 1024.50   47.30
  -5  -2  10 1040.10   42.20
  -5  -2  10 1091.29   43.60
  -5  -2  10 1097.99   37.70
  -5   2   9  587.94   29.70
  -5   2   9  556.04   24.40
  -5  -2   9  539.05   25.20
  -5  -2   9  557.04   24.90
  -5  -2   9  579.44   21.70
  -5   2   8  221.58   16.60
  -5   2   8  201.98   12.30
   5   2  -8  206.78   19.80
  -5  -2   8  222.48   10.60
  -5  -2   8  199.88   12.70
  -5  -2   8  229.28   12.70
   5  -2  -8  193.78   15.00
  -5   2   7 1110.89   41.20
  -5   2   7 1057.89   47.80
   5   2  -7 1047.00   49.80
   5  -2  -7 1081.19   45.90
  -5  -2   7 1148.59   41.80
  -5  -2   7 1142.89   43.50
  -5  -2   7 1090.79   38.80
   5   2  -6  560.94   30.70
  -5   2   6  626.24   24.00
  -5   2   6  622.04   24.80
  -5   2   6  568.34   29.60
  -5  -2   6  579.04   24.20
  -5  -2   6  600.54   22.60
  -5  -2   6  569.94   25.00
   5  -2  -6  611.54   27.30
   5   2  -5    8.00    5.10
  -5   2   5   12.40    5.90
  -5   2   5   12.00    3.40
  -5   2   5   13.10    3.40
   5  -2  -5    1.00    3.10
  -5  -2   5    5.50    2.90
  -5  -2   5   12.10    3.80
  -5  -2   5    7.40    2.60
  -5   2   4  104.39    7.40
  -5   2   4  102.19    6.50
   5   2  -4  104.29   11.90
  -5   2   4  106.59   11.80
  -5   2   4   89.39    7.10
  -5  -2   4   88.79    6.40
  -5  -2   4   96.29    6.50
  -5  -2   4   96.29    7.20
  -5   2   3  579.64   22.80
  -5   2   3  563.74   28.10
  -5   2   3  551.44   23.40
  -5   2   3  561.84   20.60
  -5  -2   3  623.24   28.30
  -5  -2   3  522.45   22.00
  -5  -2   3  545.15   21.40
  -5  -2   3  530.85   21.60
  -5   2   2 3908.01  130.49
  -5   2   2 3877.41  145.39
  -5   2   2 3844.82  141.79
  -5   2   2 3966.70  139.49
  -5  -2   2 3804.32  138.99
  -5  -2   2 3841.12  141.19
  -5  -2   2 4190.98  145.49
  -5  -2   2 3822.52  131.89
  -5  -2   2 3900.51  129.09
  -5   2   1 1581.64   61.09
  -5   2   1 1693.33   58.79
  -5   2   1 1619.14   64.89
  -5  -2   1 1553.94   58.49
  -5  -2   1 1554.74   55.49
  -5  -2   1 1587.64   60.29
  -5  -2   1 1735.53   64.99
  -5   2   0   56.59    4.20
  -5   2   0   55.19    6.70
  -5   2   0   54.79    8.50
  -5  -2   0   51.89    8.80
  -5  -2   0   58.59    3.90
  -5  -2   0   57.99    6.30
  -5  -2   0   52.89    5.60
   5  -2   0   55.99    4.70
  -5   2  -1  311.37   17.50
  -5   2  -1  335.37   17.20
  -5   2  -1  350.26   13.50
  -5  -2  -1  356.76   20.50
  -5  -2  -1  358.96   16.60
   5  -2   1  337.37   12.80
  -5  -2  -1  328.97   14.60
  -5  -2  -1  333.37   13.50
  -5   2  -2  274.27   15.40
  -5   2  -2  266.07   11.00
  -5   2  -2  271.77   14.70
  -5   2  -2  271.07   11.10
  -5  -2  -2  299.77   14.50
   5  -2   2  262.47   10.40
  -5  -2  -2  297.47   18.50
  -5  -2  -2  275.17   11.20
  -5  -2  -2  286.97   12.90
  -5   2  -3   32.00    2.90
   5   2   3   34.40    5.70
  -5   2  -3   29.50    5.50
  -5  -2  -3   27.20    3.10
   5  -2   3   30.20    2.90
  -5  -2  -3   29.70    4.90
  -5  -2  -3   33.50    7.60
  -5  -2  -3   29.00    5.30
  -5   2  -4   57.29    4.10
  -5   2  -4   44.40    6.60
   5   2   4   47.80    6.50
  -5  -2  -4   49.80    8.50
  -5  -2  -4   43.40    4.20
  -5  -2  -4   48.10    6.80
  -5  -2  -4   41.10    5.80
   5  -2   4   51.29    4.00
  -5   2  -5   22.10    5.80
  -5   2  -5   38.50    3.80
   5   2   5   48.10    6.70
  -5  -2  -5   37.50    6.20
  -5  -2  -5   45.30    8.30
   5  -2   5   34.50    3.90
  -5  -2  -5   40.60    4.50
  -5   2  -6  268.37   12.70
   5   2   6  270.17   15.00
  -5   2  -6  281.87   17.00
  -5  -2  -6  271.97   14.40
  -5  -2  -6  267.77   18.80
  -5  -2  -6  264.97   13.70
   5  -2   6  263.27   12.10
  -5   2  -7   37.40    8.00
  -5   2  -7   62.09    6.10
   5   2   7   53.19    8.00
   5  -2   7   62.09    6.00
  -5  -2  -7   64.89   10.80
  -5  -2  -7   53.19    8.00
  -5  -2  -7   46.50    6.60
  -5   2  -8 1089.39   49.40
   5   2   8 1100.99   44.00
   5  -2   8 1133.09   41.50
  -5  -2  -8 1164.18   43.30
  -5  -2  -8 1106.79   46.00
  -5   2  -9   60.79   11.10
   5   2   9   60.19    8.90
   5  -2   9   63.29    7.20
  -5  -2  -9   44.60    8.10
  -5   2 -10  226.38   21.70
   5   2  10  254.37   17.10
  -5  -2 -10  263.07   18.30
   5  -2  10  257.47   14.30
   5   2  11   13.80    8.00
  -5   2 -11    2.10    8.20
   5  -2  11   -0.70    5.00
  -5  -2 -11   -1.30    6.50
  -5   2 -12   -0.50    9.50
   5   2  12   12.00    7.60
  -5  -2 -12    1.40    8.10
   5  -2  12    6.50    6.50
  -5   2 -13   15.80   12.90
   5   2  13   21.80    9.50
  -5  -2 -13    9.50   10.30
  -5   2 -14   49.80   16.30
  -5  -2 -14   36.10   13.60
  -5   2 -15    3.00   13.30
  -5  -2 -15   19.10   13.20
  -5   2 -16  174.28   27.60
  -5  -2 -16  229.18   28.90
  -5   2 -17   22.10   19.20
  -5  -2 -17   13.50   17.10
  -5   3  17   41.50   12.00
  -5  -3  17   41.10   12.20
  -5   3  16  305.67   21.70
  -5  -3  16  298.57   21.60
  -5   3  15   -2.60    8.30
  -5  -3  15   12.50    8.70
  -5   3  14   12.00    8.40
  -5  -3  14   17.90    8.10
  -5   3  13  391.36   21.20
  -5  -3  13  326.37   20.60
  -5   3  12    3.70    6.70
  -5  -3  12   -0.90    5.90
  -5   3  11  790.82   34.50
  -5  -3  11  820.62   35.30
  -5   3  10  299.47   22.70
  -5   3  10  324.67   18.50
  -5  -3  10  375.66   19.20
  -5  -3  10  361.26   15.60
  -5   3   9   21.50    8.00
  -5   3   9   26.10    6.50
  -5  -3   9   11.20    4.00
  -5  -3   9   17.80    5.80
  -5  -3   9    7.10    3.60
  -5   3   8    1.00    6.40
  -5   3   8    2.80    4.80
  -5   3   8    5.40    4.00
  -5  -3   8    2.40    4.30
  -5  -3   8    6.20    3.80
  -5  -3   8    5.00    3.20
  -5   3   7  519.95   22.90
   5   3  -7  517.15   31.30
  -5   3   7  554.34   22.60
  -5   3   7  508.05   29.90
  -5  -3   7  553.44   23.40
  -5  -3   7  497.95   23.30
   5  -3  -7  523.15   25.70
  -5  -3   7  558.24   21.30
   5   3  -6 2124.39   89.09
  -5   3   6 2127.69   76.59
  -5   3   6 2152.98   88.39
  -5   3   6 2160.68   80.19
  -5  -3   6 2184.78   77.49
   5  -3  -6 2105.39   82.29
  -5  -3   6 2331.27   80.79
  -5  -3   6 2198.68   73.99
   5   3  -5 1745.33   75.89
  -5   3   5 1811.32   68.19
  -5   3   5 1892.81   64.79
  -5   3   5 1862.21   76.49
  -5  -3   5 1859.01   68.19
  -5  -3   5 1851.01   62.99
  -5  -3   5 1762.42   65.59
   5  -3  -5 1873.71   69.69
   5   3  -4  199.88   18.50
  -5   3   4  219.28   10.80
  -5   3   4  229.68   18.50
  -5   3   4  211.68   11.50
  -5  -3   4  202.58   10.50
   5  -3  -4  215.48   11.80
  -5  -3   4  199.78   10.70
  -5  -3   4  212.78   11.60
  -5   3   3  933.01   34.10
  -5   3   3  857.61   34.50
  -5   3   3  870.31   42.20
   5   3  -3  823.02   40.50
  -5   3   3  872.31   31.90
  -5  -3   3  832.72   33.50
  -5  -3   3  890.11   33.20
  -5  -3   3  900.61   32.10
  -5   3   2  395.76   16.70
  -5   3   2  364.66   15.30
  -5   3   2  398.46   25.10
  -5   3   2  353.66   17.50
  -5  -3   2  392.76   17.10
  -5  -3   2  393.46   17.30
  -5  -3   2  455.85   24.90
  -5  -3   2  408.26   16.50
  -5  -3   2  405.96   16.60
  -5   3   1  224.98   18.40
  -5   3   1  225.98   10.60
  -5   3   1  225.98   12.40
  -5   3   1  239.88    9.40
  -5  -3   1  216.98   10.30
  -5  -3   1  237.38   11.30
   5  -3  -1  211.38   12.50
  -5  -3   1  258.07   18.60
  -5  -3   1  216.78   11.20
  -5   3   0  400.06   18.70
  -5   3   0  385.36   13.80
  -5   3   0  378.16   23.60
  -5   3   0  414.06   16.40
  -5  -3   0  379.16   16.50
  -5  -3   0  413.76   24.60
  -5  -3   0  393.36   17.60
  -5  -3   0  394.16   16.20
   5  -3   0  391.56   17.10
  -5   3  -1  425.86   23.90
  -5   3  -1  427.56   16.90
  -5   3  -1  409.56   19.80
  -5  -3  -1  417.26   17.40
  -5  -3  -1  420.26   25.70
   5  -3   1  396.16   16.90
  -5  -3  -1  425.46   19.00
  -5  -3  -1  404.16   16.70
  -5   3  -2 1229.48   46.00
   5   3   2 1293.17   48.20
  -5   3  -2 1236.48   52.69
   5  -3   2 1200.68   44.30
  -5  -3  -2 1231.98   46.20
  -5  -3  -2 1247.98   46.40
  -5  -3  -2 1357.46   44.80
  -5  -3  -2 1256.47   55.69
  -5  -3  -2 1245.58   48.40
  -5   3  -3  394.86   15.90
   5   3   3  398.36   19.90
  -5   3  -3  398.16   21.90
   5  -3   3  397.26   15.80
  -5  -3  -3  405.36   25.80
  -5  -3  -3  362.06   16.70
  -5  -3  -3  405.36   18.30
  -5  -3  -3  372.76   16.30
  -5   3  -4 1612.54   66.69
   5   3   4 1680.73   61.79
  -5   3  -4 1730.73   60.69
  -5  -3  -4 1648.94   70.49
  -5  -3  -4 1664.43   63.39
   5  -3   4 1669.03   57.89
  -5  -3  -4 1626.94   61.19
  -5  -3  -4 1616.94   57.79
  -5   3  -5    5.20    2.30
  -5   3  -5    9.10    5.80
   5   3   5   11.60    5.90
  -5  -3  -5   17.40    8.30
  -5  -3  -5    5.90    4.20
  -5  -3  -5    9.50    3.10
   5  -3   5    6.00    3.10
  -5   3  -6 1592.24   56.39
  -5   3  -6 1495.85   62.99
   5   3   6 1464.45   57.09
  -5  -3  -6 1502.65   53.59
  -5  -3  -6 1434.96   65.49
   5  -3   6 1520.05   53.59
  -5  -3  -6 1488.45   57.29
  -5   3  -7  177.98   17.30
   5   3   7  150.68   13.70
   5  -3   7  173.58   10.00
  -5  -3  -7  145.99   11.00
  -5  -3  -7  162.78   11.20
  -5   3  -8  167.38   17.70
   5   3   8  184.48   14.20
  -5  -3  -8  178.78   12.90
   5  -3   8  180.88   11.00
  -5  -3  -8  166.68   12.60
  -5   3  -9   40.90   11.10
   5   3   9   35.90    9.00
   5  -3   9   55.09    7.20
  -5  -3  -9   32.90    7.50
  -5  -3  -9   29.80    8.10
  -5   3 -10   14.10    9.80
   5   3  10    0.80    7.50
  -5  -3 -10   15.60    7.40
   5  -3  10   23.50    5.80
  -5   3 -11   45.70   13.60
   5   3  11   77.49   11.80
  -5  -3 -11   78.99   12.50
   5  -3  11   59.69    8.60
   5   3  12  984.50   42.50
  -5   3 -12  909.11   51.69
  -5  -3 -12  847.52   45.80
   5  -3  12 1007.70   39.80
  -5   3 -13    3.20   11.70
   5   3  13   13.90    9.60
  -5  -3 -13   10.50   10.10
   5   3  14   32.30   10.70
  -5   3 -14   32.90   15.70
  -5  -3 -14   24.20   12.10
  -5   3 -15   -2.40   14.60
  -5  -3 -15    7.20   13.00
  -5   3 -16   21.50   18.60
  -5  -3 -16   36.20   16.80
  -5   3 -17   46.80   22.10
  -5  -3 -17   55.79   20.90
  -5   4  17    2.20   10.80
  -5  -4  17    0.00    9.80
  -5   4  16   20.50   10.70
  -5  -4  16    6.70    9.60
  -5   4  15  146.39   16.10
  -5  -4  15  131.39   15.80
  -5   4  14  155.28   16.20
  -5  -4  14  198.58   18.00
  -5   4  13   71.39   11.50
  -5  -4  13   75.69   11.80
  -5   4  12  210.68   15.80
  -5  -4  12  232.88   16.70
  -5   4  11   11.30    7.10
  -5  -4  11    9.80    6.50
  -5  -4  11   12.90    5.10
  -5   4  10  286.07   17.40
  -5  -4  10  289.77   14.50
  -5  -4  10  280.77   17.70
  -5   4   9  388.16   19.30
  -5   4   9  375.66   16.90
  -5   4   9  394.46   27.00
  -5  -4   9  342.77   16.40
  -5  -4   9  327.47   17.70
  -5  -4   9  332.27   19.20
  -5   4   8  143.69    9.00
  -5   4   8  125.29   11.20
  -5   4   8  137.29   18.00
  -5  -4   8  110.89    9.00
  -5  -4   8  125.39    9.10
  -5  -4   8  121.69   11.50
  -5   4   7  441.36   29.80
  -5   4   7  475.25   20.50
  -5   4   7  454.65   21.50
  -5  -4   7  471.05   22.30
  -5  -4   7  459.65   19.90
  -5  -4   7  510.25   21.60
  -5   4   6   24.10    5.80
   5   4  -6   13.10    8.20
  -5   4   6    9.50    8.60
  -5   4   6   15.30    4.60
  -5  -4   6   20.40    4.10
  -5  -4   6   17.50    5.40
  -5  -4   6   17.70    4.60
  -5   4   5  262.47   22.30
  -5   4   5  257.87   13.40
  -5   4   5  257.47   13.90
   5   4  -5  291.77   22.50
  -5  -4   5  280.97   15.00
  -5  -4   5  257.07   12.90
  -5  -4   5  271.87   13.30
  -5   4   4  194.38   10.80
  -5   4   4  197.58   11.00
  -5   4   4  210.68   21.30
   5   4  -4  186.68   19.70
  -5  -4   4  187.98   10.20
  -5  -4   4  171.28   10.40
   5  -4  -4  198.88   11.40
  -5  -4   4  190.58   12.00
  -5   4   3  553.74   32.70
  -5   4   3  505.15   21.80
   5   4  -3  510.35   30.30
  -5   4   3  518.75   21.10
  -5  -4   3  499.95   21.00
  -5  -4   3  543.65   22.70
  -5  -4   3  495.65   21.30
  -5   4   2 1312.97   46.80
  -5   4   2 1277.47   50.09
  -5   4   2 1312.67   49.40
   5   4  -2 1323.37   58.79
  -5   4   2 1334.97   60.79
  -5  -4   2 1281.17   49.10
  -5  -4   2 1359.76   46.90
  -5  -4   2 1298.77   48.60
  -5  -4   2 1317.77   50.19
  -5   4   1  110.09    7.20
  -5   4   1  163.18   10.00
  -5   4   1  102.29   15.20
  -5   4   1  115.89    7.40
  -5  -4   1  139.69   17.30
  -5  -4   1  103.09    7.90
   5  -4  -1   93.59    9.80
  -5  -4   1  104.69    7.60
  -5  -4   1   97.99    6.70
  -5   4   0 1416.56   48.10
  -5   4   0 1435.06   51.59
  -5   4   0 1356.06   61.99
  -5   4   0 1332.47   53.79
  -5  -4   0 1504.25   63.39
  -5  -4   0 1393.26   52.39
  -5  -4   0 1355.46   48.90
  -5  -4   0 1292.07   51.19
   5  -4   0 1368.76   51.19
  -5   4  -1   24.50    3.40
  -5   4  -1   29.80    3.30
  -5   4  -1   25.30    9.20
  -5   4  -1   29.30    3.80
  -5  -4  -1   20.70    9.30
  -5  -4  -1   21.20    3.30
  -5  -4  -1   27.70    5.20
   5  -4   1   34.40    5.70
  -5  -4  -1   27.80    5.00
  -5   4  -2 1640.74   54.79
  -5   4  -2 1635.44   59.99
  -5   4  -2 1505.25   68.89
   5   4   2 1659.53   62.79
  -5  -4  -2 1638.74   57.09
  -5  -4  -2 1826.32   73.69
  -5  -4  -2 1640.84   61.59
   5  -4   2 1566.74   58.19
  -5  -4  -2 1587.04   60.29
  -5   4  -3  701.33   27.30
  -5   4  -3  648.94   35.50
   5   4   3  728.53   31.80
  -5  -4  -3  691.33   26.90
   5  -4   3  674.33   27.20
  -5  -4  -3  687.63   28.60
  -5  -4  -3  694.23   39.40
  -5  -4  -3  694.43   27.80
   5   4   4  534.05   26.70
  -5   4  -4  589.14   22.90
  -5   4  -4  570.24   31.20
  -5  -4  -4  555.54   24.20
   5  -4   4  560.54   22.70
  -5  -4  -4  532.85   34.50
  -5  -4  -4  550.54   22.70
  -5  -4  -4  525.45   23.10
  -5   4  -5  333.47   23.30
  -5   4  -5  362.26   16.10
   5   4   5  339.37   20.40
  -5  -4  -5  351.66   16.50
  -5  -4  -5  354.66   16.70
   5  -4   5  347.97   16.30
  -5   4  -6  146.69   17.40
   5   4   6  147.79   14.10
  -5  -4  -6  160.98   10.60
   5  -4   6  175.28   10.60
  -5  -4  -6  162.58   10.70
  -5   4  -7   20.70    9.10
   5   4   7   20.90    7.50
  -5  -4  -7   35.70    6.30
  -5  -4  -7   24.50    5.50
   5  -4   7   19.50    5.40
  -5   4  -8 1951.50   84.99
   5   4   8 1997.00   75.69
  -5  -4  -8 1845.22   76.59
   5  -4   8 2025.60   71.69
  -5  -4  -8 2092.69   70.59
   5   4   9  155.78   15.80
  -5   4  -9  115.09   17.60
   5  -4   9  140.19   11.00
  -5  -4  -9  134.09   13.40
  -5   4 -10  470.45   33.10
   5   4  10  451.25   26.00
   5  -4  10  478.45   22.90
  -5  -4 -10  444.66   25.90
   5   4  11   37.00   11.30
  -5   4 -11   23.00   13.00
   5  -4  11   11.40    6.80
  -5  -4 -11   15.20    8.60
   5   4  12   -0.10    9.40
  -5   4 -12   -5.70   11.00
  -5  -4 -12   -0.40    8.50
   5   4  13   70.59   13.40
  -5   4 -13  104.69   21.60
  -5  -4 -13   48.20   13.60
   5   4  14   21.70   12.70
  -5   4 -14   60.59   18.80
  -5  -4 -14   20.40   13.20
  -5   4 -15   49.40   20.20
  -5  -4 -15   13.70   13.80
  -5   4 -16  423.06   43.70
  -5  -4 -16  296.67   32.90
  -5   5  16  141.59   17.10
  -5  -5  16  134.79   17.30
  -5   5  15   80.09   13.50
  -5  -5  15   75.39   13.20
  -5   5  14   18.60   10.00
  -5  -5  14   34.60   10.40
  -5   5  13   20.10    9.40
  -5  -5  13   18.70    8.90
  -5   5  12   44.00    9.90
  -5  -5  12   42.90    9.80
  -5   5  11  138.99   14.00
  -5  -5  11  134.19   14.60
  -5  -5  11  140.39   11.70
  -5   5  10   19.90    7.90
  -5  -5  10   22.00    7.60
  -5  -5  10   26.60    6.70
  -5   5   9   -8.90    5.70
  -5  -5   9    5.30    4.70
  -5  -5   9    5.90    6.40
  -5   5   8   -5.40    9.50
  -5   5   8    2.70    5.60
  -5  -5   8    2.90    4.20
  -5  -5   8   -0.80    2.90
  -5  -5   8    4.20    5.90
  -5   5   7   13.00   10.30
  -5   5   7   12.90    6.30
  -5  -5   7   14.70    4.10
  -5  -5   7   13.80    5.10
  -5  -5   7   18.00    6.50
  -5   5   6  261.37   15.20
  -5   5   6  231.88   25.30
  -5   5   6  260.67   12.80
  -5  -5   6  271.17   14.10
  -5  -5   6  273.17   14.00
  -5  -5   6  247.58   15.90
  -5   5   5  119.09   18.60
  -5   5   5  128.69   10.10
  -5   5   5  116.99    7.80
  -5  -5   5  107.29   10.90
  -5  -5   5   99.59    9.00
  -5  -5   5  112.39    8.10
  -5   5   4  143.29   20.20
  -5   5   4  118.69    9.80
  -5   5   4  127.09    8.30
  -5  -5   4   86.59    9.80
  -5  -5   4  104.29    9.00
  -5  -5   4   95.99    7.50
  -5   5   3   -8.60    7.80
  -5   5   3    2.90    4.00
  -5   5   3    0.90    4.00
  -5  -5   3    2.20    4.70
  -5  -5   3    0.10    3.50
  -5  -5   3    1.70    2.30
  -5   5   2   36.30    5.90
  -5   5   2   38.80   12.50
  -5  -5   2   42.40    5.00
  -5  -5   2   48.30    7.30
  -5  -5   2   43.60    6.20
  -5  -5   2   48.90    5.90
  -5   5   1 1342.07   47.70
  -5   5   1 1269.57   62.89
  -5  -5   1 1312.07   49.99
  -5  -5   1 1301.87   49.70
  -5  -5   1 1312.77   47.40
  -5   5   0   67.49    5.80
  -5   5   0   54.09    5.80
  -5   5   0   49.60    5.80
  -5   5   0   43.20   12.40
   5  -5   0   45.90    7.80
  -5  -5   0   42.90    5.80
  -5  -5   0   47.50    6.40
  -5  -5   0   42.20    5.10
  -5   5  -1  485.35   20.10
   5   5   1  508.05   27.10
  -5   5  -1  515.75   21.30
  -5   5  -1  465.45   32.30
  -5  -5  -1  507.35   21.30
   5  -5   1  497.15   23.20
  -5  -5  -1  500.25   21.20
  -5  -5  -1  514.65   22.10
  -5  -5  -1  500.35   21.60
   5   5   2  260.97   18.70
  -5   5  -2  229.38   24.00
  -5   5  -2  248.78   11.60
  -5   5  -2  265.27   12.60
  -5  -5  -2  237.48   13.00
   5  -5   2  251.97   14.60
  -5  -5  -2  237.48   13.10
  -5  -5  -2  251.17   12.90
   5   5   3   60.49   10.60
  -5   5  -3   53.19   12.70
  -5   5  -3   39.20    4.60
  -5  -5  -3   38.00    5.30
   5  -5   3   39.30    6.60
  -5  -5  -3   59.69    6.40
  -5  -5  -3   42.30    6.40
  -5   5  -4 1556.64   74.59
   5   5   4 1684.83   66.79
  -5   5  -4 1685.43   58.59
  -5  -5  -4 1969.50   64.89
  -5  -5  -4 1637.24   64.29
  -5  -5  -4 1630.74   60.09
   5  -5   4 1689.33   62.29
  -5   5  -5  434.96   29.40
   5   5   5  435.36   24.50
   5  -5   5  439.26   20.20
  -5  -5  -5  427.66   19.20
  -5  -5  -5  398.66   19.80
   5   5   6  349.17   22.40
  -5   5  -6  333.57   26.80
  -5  -5  -6  401.86   18.00
   5  -5   6  367.26   18.40
  -5  -5  -6  382.46   18.90
   5   5   7  528.25   29.00
  -5   5  -7  536.55   35.40
  -5  -5  -7  590.44   24.60
  -5  -5  -7  562.74   26.50
   5  -5   7  597.44   25.60
  -5   5  -8   13.30   10.50
   5   5   8    5.00    8.00
  -5  -5  -8   20.60    6.40
  -5  -5  -8    8.20    5.40
   5  -5   8   11.20    5.60
  -5   5  -9   11.00   10.70
   5   5   9   -7.90    7.90
  -5  -5  -9   -1.00    5.40
   5  -5   9    2.00    5.40
  -5   5 -10    8.20   11.60
   5   5  10   17.50    9.90
  -5  -5 -10   10.60    6.70
   5  -5  10    3.90    6.30
   5   5  11  212.18   20.20
  -5   5 -11  187.38   26.50
  -5  -5 -11  172.98   18.10
   5  -5  11  193.78   14.90
   5   5  12  706.23   35.40
  -5   5 -12  620.04   45.10
  -5  -5 -12  589.04   35.80
  -5   5 -13  138.59   25.10
   5   5  13  197.38   20.80
  -5  -5 -13  152.98   20.10
   5   5  14  136.09   18.60
  -5   5 -14   77.49   22.50
  -5  -5 -14   83.59   17.40
  -5   5 -15   -2.40   17.80
   5   5  15   13.20   13.00
  -5  -5 -15    5.60   13.60
  -5   5 -16    1.50   20.90
  -5  -5 -16   -5.60   15.40
  -5   6  16   13.10   11.80
  -5  -6  16   11.50   11.20
  -5   6  15  147.79   17.60
  -5  -6  15  145.19   18.30
  -5   6  14   44.40   11.80
  -5  -6  14   36.00   11.80
  -5   6  13   76.09   12.90
  -5  -6  13   55.09   11.90
  -5   6  12   66.89   12.00
  -5  -6  12   59.09   11.60
  -5   6  11    0.80    7.30
  -5  -6  11    2.30    6.20
  -5  -6  11  -12.60    7.00
  -5   6  10  156.38   15.30
  -5  -6  10  174.78   16.60
  -5  -6  10  176.08   12.80
  -5   6   9  127.59   13.30
  -5  -6   9  107.79   13.50
  -5  -6   9  114.19   10.90
  -5   6   8   16.60   12.20
  -5   6   8   -1.80    6.30
  -5  -6   8   10.90    7.10
  -5  -6   8    0.10    4.90
  -5   6   7  249.18   27.90
  -5   6   7  203.08   14.90
  -5  -6   7  214.18   13.20
  -5  -6   7  230.78   13.30
  -5  -6   7  217.68   15.70
  -5   6   6   32.00    7.40
  -5   6   6   25.40   12.50
  -5  -6   6   27.40    5.20
  -5  -6   6   30.80    6.10
  -5  -6   6   29.80    7.90
  -5   6   5  351.76   33.50
  -5   6   5  343.47   19.00
  -5  -6   5  344.07   20.30
  -5  -6   5  376.66   17.80
  -5  -6   5  375.76   17.80
  -5   6   4   -9.10    9.70
  -5   6   4    0.40    5.20
  -5  -6   4    2.70    2.80
  -5  -6   4    2.80    5.80
  -5  -6   4    1.50    4.20
  -5   6   3  361.16   34.90
  -5   6   3  343.67   18.10
  -5  -6   3  352.46   17.00
  -5  -6   3  370.36   20.20
  -5  -6   3  367.76   17.40
  -5   6   2  292.17   15.80
  -5   6   2  277.17   30.80
  -5  -6   2  302.37   15.30
  -5  -6   2  291.27   14.70
  -5  -6   2  308.87   14.90
  -5  -6   2  269.37   17.30
  -5   6   1   55.99    7.20
   5   6  -1   34.20   10.20
  -5   6   1   35.80   14.00
  -5  -6   1   30.00    4.70
  -5  -6   1   35.40    6.10
  -5  -6   1   35.60    5.20
  -5   6   0  169.18   23.00
  -5   6   0  175.18   11.30
   5   6   0  162.98   17.60
  -5  -6   0  165.18   10.50
  -5  -6   0  177.18   10.50
   5  -6   0  180.68   14.50
  -5  -6   0  169.38   10.30
  -5  -6   0  171.38   11.30
  -5   6  -1  489.85   21.60
  -5   6  -1  534.05   36.80
   5   6   1  474.25   27.90
  -5  -6  -1  500.15   22.30
  -5  -6  -1  502.65   22.50
   5  -6   1  508.55   25.20
  -5  -6  -1  528.25   22.40
  -5   6  -2   20.50   11.40
  -5   6  -2   12.50    4.80
   5   6   2   15.50    8.50
   5  -6   2    9.70    5.90
  -5  -6  -2   18.10    4.40
  -5  -6  -2   14.20    5.20
  -5  -6  -2   16.70    4.80
  -5   6  -3 1733.23   60.69
   5   6   3 1675.13   68.59
  -5   6  -3 1586.74   78.79
   5  -6   3 1742.13   64.49
  -5  -6  -3 1696.63   65.09
  -5  -6  -3 1747.43   61.19
  -5   6  -4   11.10    4.50
  -5   6  -4    1.70   10.00
   5   6   4   14.40    9.10
   5  -6   4   11.40    5.80
  -5  -6  -4   15.90    4.40
  -5  -6  -4    8.70    4.80
  -5   6  -5   31.40    5.20
  -5   6  -5   35.60   13.30
   5   6   5   33.50   10.00
   5  -6   5   26.00    7.00
  -5  -6  -5   28.60    5.70
  -5  -6  -5   36.40    6.70
  -5   6  -6  173.08   22.70
   5   6   6  177.18   18.10
  -5  -6  -6  146.59   11.10
   5  -6   6  162.28   12.90
  -5  -6  -6  155.58   11.80
   5   6   7  521.15   30.00
  -5   6  -7  579.64   38.70
   5  -6   7  532.75   26.10
  -5  -6  -7  565.84   26.60
  -5  -6  -7  528.35   23.80
  -5   6  -8  523.35   38.40
   5   6   8  545.65   31.00
  -5  -6  -8  512.35   27.10
   5  -6   8  558.64   26.80
  -5  -6  -8  550.94   24.50
  -5   6  -9  780.82   50.89
   5   6   9  893.51   42.70
   5  -6   9  900.21   38.40
  -5  -6  -9  888.91   40.80
   5   6  10   63.09   13.40
  -5   6 -10   82.99   20.00
   5  -6  10   79.59   11.20
  -5  -6 -10   50.49   10.40
   5   6  11  375.66   26.90
  -5   6 -11  389.86   39.30
   5  -6  11  441.46   24.00
  -5  -6 -11  351.06   25.20
   5   6  12    1.80   12.30
  -5   6 -12    8.70   16.70
  -5  -6 -12    4.60    9.40
   5   6  13  127.19   18.30
  -5   6 -13   88.99   24.40
  -5  -6 -13   94.09   17.00
   5   6  14   16.00   13.80
  -5   6 -14  -20.50   16.80
  -5  -6 -14  -22.40   10.60
  -5   6 -15  333.77   42.10
   5   6  15  314.37   28.10
  -5  -6 -15  290.97   31.90
  -5   7  15   71.99   14.90
  -5  -7  15   85.99   16.60
  -5   7  14  103.79   15.70
  -5  -7  14   74.49   15.30
  -5   7  13   12.40   10.60
  -5  -7  13   -5.80    9.30
  -5   7  12    1.60    9.10
  -5  -7  12   19.50   10.40
  -5   7  11  372.06   24.00
  -5  -7  11  386.76   25.70
  -5  -7  11  468.95   22.60
  -5   7  10   82.29   12.60
  -5  -7  10  118.89   11.90
  -5  -7  10   85.69   13.40
  -5   7   9   13.90    8.50
  -5  -7   9    7.10    7.90
  -5  -7   9    8.30    6.40
  -5   7   8   -4.40    7.20
  -5  -7   8    4.80    6.20
  -5  -7   8    8.90    7.90
  -5   7   7  158.38   14.70
  -5  -7   7  155.08   13.00
  -5  -7   7  145.89   15.40
  -5   7   6  396.06   33.80
  -5   7   6  428.46   22.10
  -5  -7   6  379.56   19.70
  -5  -7   6  397.96   23.30
  -5   7   5  170.98   25.10
  -5   7   5  175.08   13.90
  -5  -7   5  172.48   16.30
  -5  -7   5  203.48   12.10
  -5  -7   5  178.58   12.50
  -5   7   4   13.70   13.10
  -5   7   4   -6.20    6.00
  -5  -7   4    1.90    4.50
  -5  -7   4   -1.20    2.90
  -5  -7   4    4.70    6.50
  -5   7   3    5.60    6.20
  -5   7   3   13.80   13.20
   5   7  -3   15.50   10.30
  -5  -7   3   11.70    4.00
  -5  -7   3   16.50    7.30
  -5  -7   3   14.60    5.50
  -5   7   2   15.90   14.30
  -5   7   2   17.30    6.20
   5   7  -2   17.60   10.40
  -5  -7   2   19.60    4.90
  -5  -7   2   19.20    7.10
  -5  -7   2   16.40    5.60
  -5  -7   2   20.40    4.60
  -5   7   1 1096.99   62.69
   5   7  -1 1096.29   51.49
  -5   7   1 1131.49   44.00
  -5  -7   1 1101.39   42.90
  -5  -7   1 1165.48   44.20
  -5  -7   1 1111.79   44.70
  -5  -7   1 1150.98   45.30
   5   7   0   12.70   10.30
  -5   7   0   17.90    6.30
  -5   7   0   13.70   12.80
  -5  -7   0    2.40    4.70
  -5  -7   0   16.30    5.10
  -5  -7   0   14.80    4.40
   5  -7   0   25.60    8.40
   5   7   1  189.78   20.10
  -5   7  -1  168.88   12.10
  -5   7  -1  168.78   25.30
  -5  -7  -1  169.78   11.40
  -5  -7  -1  174.18   11.80
   5  -7   1  148.19   15.50
  -5   7  -2  525.25   23.20
   5   7   2  536.25   30.70
  -5   7  -2  518.25   39.60
  -5  -7  -2  534.75   23.60
  -5  -7  -2  529.85   24.20
   5  -7   2  484.25   26.80
  -5   7  -3   -4.40    4.90
  -5   7  -3   10.50   12.20
   5   7   3   11.60    9.00
  -5  -7  -3    9.60    4.30
   5  -7   3    5.10    6.80
  -5  -7  -3   19.10    5.80
  -5   7  -4  116.59    9.90
  -5   7  -4  104.79   20.70
   5   7   4  108.19   15.80
   5  -7   4  120.19   13.20
  -5  -7  -4   96.49   10.00
  -5  -7  -4  102.79   10.40
   5   7   5  809.62   41.50
  -5   7  -5  850.81   51.99
   5  -7   5  813.22   37.10
  -5  -7  -5  873.11   36.70
  -5  -7  -5  843.32   34.10
   5   7   6   11.00   10.50
  -5   7  -6    6.90   12.50
  -5  -7  -6   -1.70    4.50
  -5  -7  -6   12.00    6.10
   5  -7   6    5.70    6.80
  -5   7  -7 1175.88   65.79
   5   7   7 1164.68   53.79
  -5  -7  -7 1179.78   50.39
   5  -7   7 1227.48   49.90
  -5  -7  -7 1227.48   45.90
   5   7   8   22.00   11.80
  -5   7  -8    5.80   13.50
  -5  -7  -8    3.00    6.40
   5  -7   8   -0.40    6.90
  -5   7  -9   30.30   17.00
   5   7   9   35.30   12.90
  -5  -7  -9   31.60    8.90
   5  -7   9   36.70    9.80
   5   7  10  122.49   17.80
  -5   7 -10  125.99   24.90
   5  -7  10  123.69   15.20
  -5  -7 -10   99.59   13.80
  -5   7 -11  515.65   49.40
   5   7  11  620.74   35.80
  -5  -7 -11  546.85   33.60
   5  -7  11  654.13   32.60
  -5   7 -12   50.49   21.90
   5   7  12   33.10   14.70
  -5  -7 -12   33.70   12.50
   5   7  13  266.97   25.60
  -5   7 -13  198.58   34.70
  -5  -7 -13  233.68   24.70
  -5   7 -14   20.90   23.30
   5   7  14   20.60   16.20
  -5   8  14   53.39   14.30
  -5  -8  14   58.09   15.40
  -5   8  13  119.49   16.60
  -5  -8  13  104.09   17.80
  -5   8  12    3.80   10.70
  -5  -8  12  -11.30    9.30
  -5   8  11    7.20    9.90
  -5  -8  11    1.60    8.00
  -5  -8  11    9.30   10.20
  -5   8  10  320.37   22.00
  -5  -8  10  321.57   23.90
  -5  -8  10  338.97   20.00
  -5   8   9   62.59   11.80
  -5  -8   9   61.29   10.10
  -5  -8   9   62.39   13.10
  -5   8   8   17.30    9.00
  -5  -8   8   -5.80    6.20
  -5  -8   8    0.90    8.30
  -5   8   7  237.08   17.20
  -5  -8   7  195.28   14.30
  -5  -8   7  186.68   18.80
   5   8  -6  100.29   19.20
  -5   8   6  118.39   13.60
  -5  -8   6  114.79   14.80
  -5  -8   6  106.39   11.60
  -5   8   5  140.39   14.40
   5   8  -5  105.19   18.50
  -5   8   5  174.68   27.30
  -5  -8   5  140.39   15.80
  -5  -8   5  155.18   13.20
  -5   8   4   43.00   17.20
   5   8  -4   39.00   13.80
  -5   8   4   24.60    8.50
  -5  -8   4   32.20    7.50
  -5  -8   4   32.00    9.60
  -5   8   3  205.68   15.50
  -5   8   3  175.28   29.20
   5   8  -3  236.68   24.70
  -5  -8   3  212.88   13.30
  -5  -8   3  189.88   18.00
  -5  -8   3  206.48   14.00
  -5  -8   3  209.98   13.60
  -5  -8   3  212.58   13.40
   5   8  -2  599.64   35.30
  -5   8   2  597.64   27.70
  -5   8   2  574.64   45.00
  -5  -8   2  574.44   26.90
  -5  -8   2  579.24   26.40
  -5   8   1  161.08   13.60
  -5   8   1  140.19   26.40
   5   8  -1  182.68   21.30
  -5  -8   1  104.69   11.30
  -5  -8   1  146.79   11.20
   5   8   0    6.10   10.40
  -5   8   0   10.40   15.60
  -5   8   0    9.80    6.90
  -5  -8   0   13.10    4.70
  -5  -8   0   10.10    5.70
  -5   8  -1  106.39   24.00
  -5   8  -1  107.89   11.40
   5   8   1  120.69   18.10
  -5  -8  -1  128.49   10.40
   5  -8   1  113.99   15.20
  -5  -8  -1  102.39   11.30
  -5   8  -2   80.69   21.60
   5   8   2   58.39   14.20
  -5   8  -2   67.29    9.40
   5  -8   2   56.59   11.80
  -5  -8  -2   49.60    7.60
  -5  -8  -2   52.89    8.60
   5   8   3 1056.09   50.99
  -5   8  -3 1076.09   41.80
  -5   8  -3 1072.29   64.19
   5  -8   3 1062.59   47.40
  -5  -8  -3 1095.59   42.30
  -5  -8  -3 1033.70   44.40
  -5   8  -4   15.10   15.40
   5   8   4   22.90   12.50
  -5   8  -4   29.80    7.40
   5  -8   4   16.30    9.20
  -5  -8  -4   27.70    6.70
  -5  -8  -4   32.90    7.70
   5   8   5  109.99   17.50
  -5   8  -5   97.39   22.80
   5  -8   5  100.29   13.90
  -5  -8  -5   84.39   10.40
  -5  -8  -5   69.09    9.70
  -5   8  -6  154.68   27.90
   5   8   6  242.88   24.10
   5  -8   6  202.18   18.90
  -5  -8  -6  204.28   15.20
  -5  -8  -6  220.98   14.70
  -5   8  -7   11.80   15.70
   5   8   7   79.69   15.60
  -5  -8  -7   65.59    9.70
  -5  -8  -7   52.69    9.30
   5  -8   7   51.99   11.20
   5   8   8   11.90   12.30
  -5   8  -8   -2.40   15.80
  -5  -8  -8   -4.20    5.90
   5  -8   8    3.90    8.40
   5   8   9  156.78   20.60
  -5   8  -9  123.49   27.20
   5  -8   9  202.88   19.40
  -5  -8  -9  168.58   17.40
  -5   8 -10   33.50   20.80
   5   8  10   33.20   14.80
  -5  -8 -10   50.69   12.10
   5  -8  10   35.70   11.80
   5   8  11  182.38   22.40
  -5   8 -11  129.09   28.70
  -5  -8 -11  157.18   18.90
   5  -8  11  139.99   17.80
  -5   8 -12   -7.40   19.60
   5   8  12   -3.70   13.70
   5   8  13   46.50   17.10
  -5   8 -13   80.99   28.70
  -5   9  12   -2.40   11.20
   5   9 -12    4.70   18.70
  -5  -9  12    7.50   11.90
  -5   9  11  445.56   28.00
   5   9 -11  519.85   43.80
  -5  -9  11  499.85   26.90
  -5  -9  11  466.15   31.50
   5   9 -10   41.30   18.40
  -5   9  10   25.60   11.50
  -5  -9  10   21.70    9.30
  -5  -9  10   33.50   12.80
  -5   9   9    4.10    9.70
   5   9  -9   -3.50   15.60
  -5  -9   9    1.40    7.90
  -5  -9   9   -2.60    9.90
   5   9  -8   18.60   15.10
  -5   9   8   19.60   10.40
  -5  -9   8    7.30    7.30
  -5  -9   8   -0.60    9.10
   5   9  -7  100.29   19.70
  -5   9   7   71.09   12.80
  -5  -9   7   69.79   13.70
  -5  -9   7   75.09   11.30
  -5   9   6  225.58   17.50
   5   9  -6  218.38   26.40
  -5  -9   6  208.28   20.90
  -5  -9   6  189.48   15.10
   5   9  -5  380.66   33.20
  -5   9   5  322.37   20.90
  -5  -9   5  319.07   23.30
  -5  -9   5  324.67   19.30
  -5   9   4   -0.60    7.80
   5   9  -4  -20.00   10.40
  -5  -9   4   -3.40    7.80
  -5  -9   4   -1.60    5.50
   5   9  -3  226.28   26.10
  -5   9   3  250.47   17.70
  -5  -9   3  230.38   15.70
  -5   9   2  244.38   35.10
   5   9  -2  223.88   25.10
  -5   9   2  249.78   17.60
  -5  -9   2  249.18   16.00
  -5   9   1  436.36   23.70
  -5   9   1  548.95   50.79
   5   9  -1  443.56   31.80
  -5  -9   1  456.65   23.30
   5   9   0  292.37   28.00
  -5   9   0  277.47   37.80
  -5   9   0  269.27   17.60
  -5  -9   0  263.97   16.60
  -5   9  -1  316.27   39.90
   5   9   1  338.37   30.00
  -5   9  -1  348.87   19.90
  -5  -9  -1  311.47   18.90
  -5  -9  -1  344.07   19.50
   5   9   2  110.59   19.50
  -5   9  -2  108.59   12.00
  -5   9  -2   89.49   24.00
  -5  -9  -2  123.29   12.60
   5  -9   2  119.69   16.60
  -5  -9  -2  107.99   11.70
  -5   9  -3   16.90    7.90
  -5   9  -3   22.80   18.40
   5   9   3   10.20   12.30
   5  -9   3    1.30    9.70
  -5  -9  -3   18.50    7.30
  -5  -9  -3    8.40    5.60
  -5   9  -4   16.30   17.20
   5   9   4   56.19   16.00
  -5  -9  -4   40.10    8.90
  -5  -9  -4   26.70    7.30
   5  -9   4   41.80   12.30
   5   9   5   56.59   15.40
  -5   9  -5   45.10   21.10
  -5  -9  -5   27.80    8.40
   5  -9   5   43.50   12.10
  -5  -9  -5   44.20    8.70
  -5   9  -6  120.29   27.40
   5   9   6  164.18   21.80
  -5  -9  -6  174.18   14.80
   5  -9   6  171.88   18.60
  -5  -9  -6  120.59   13.60
  -5   9  -7  243.48   36.90
   5   9   7  284.97   27.00
  -5  -9  -7  206.68   17.50
   5  -9   7  256.87   23.20
   5   9   8   60.79   16.90
  -5   9  -8   52.09   24.40
   5  -9   8   48.50   13.00
   5   9   9    1.30   13.90
  -5   9  -9   19.30   20.80
   5  -9   9    4.80   10.10
   5   9  10  106.49   19.50
  -5   9 -10   49.80   25.50
   5  -9  10   47.40   13.80
   5   9  11   74.89   19.40
  -5   9 -11  171.18   35.00
   5  -9  11   92.29   17.00
   5   9  12    9.70   15.80
  -5   9 -12   -4.40   24.40
  -5  10  11    7.30   11.70
   5  10 -11   45.00   23.10
  -5 -10  11    0.90   10.40
  -5  10  10   32.60   13.40
   5  10 -10    1.50   18.30
  -5 -10  10   19.60   10.00
  -5 -10  10   17.20   13.40
  -5  10   9  593.44   32.60
   5  10  -9  605.14   43.10
  -5 -10   9  622.34   37.40
  -5 -10   9  614.14   31.30
   5  10  -8   78.99   20.90
  -5  10   8   67.49   13.20
  -5 -10   8   56.39   14.60
  -5 -10   8   46.60   10.90
  -5  10   7  638.54   33.90
   5  10  -7  658.73   43.80
  -5 -10   7  734.83   39.30
  -5 -10   7  699.73   33.00
   5  10  -6   -7.60   13.30
  -5  10   6   16.00    9.90
  -5 -10   6   11.50   10.60
  -5 -10   6   15.60    8.40
   5  10  -5   93.49   20.60
  -5  10   5   80.89   13.40
  -5 -10   5  110.59   13.20
  -5 -10   5   64.49   14.60
  -5  10   4   68.19   12.60
   5  10  -4   79.79   18.50
  -5 -10   4   70.59   11.20
   5  10  -3  289.07   30.40
  -5  10   3  281.87   20.00
  -5 -10   3  313.87   19.10
  -5  10   2    2.20    8.80
   5  10  -2    0.90   13.40
  -5 -10   2   26.30    8.20
  -5  10   1  324.57   20.40
   5  10  -1  262.47   28.60
  -5 -10   1  311.57   19.30
   5  10   0   12.30   13.50
  -5  10   0    8.20    8.80
  -5 -10   0    4.80    6.90
   5  10   1   87.89   18.60
  -5  10  -1  106.29   12.90
  -5  10  -1   45.50   24.40
  -5 -10  -1   91.49   11.90
   5  10   2   89.89   19.30
  -5  10  -2  136.29   30.20
  -5  10  -2  100.59   12.40
   5 -10   2   36.50   12.30
  -5 -10  -2  103.89   12.50
   5  10   3  322.27   31.00
  -5  10  -3  436.46   48.80
   5 -10   3  307.37   28.00
  -5 -10  -3  354.26   20.80
  -5  10  -4  102.69   28.30
   5  10   4  127.29   21.60
   5 -10   4  129.59   18.50
  -5 -10  -4  147.59   14.70
   5  10   5   62.99   17.80
  -5  10  -5   49.60   25.70
  -5 -10  -5   51.29   10.50
   5 -10   5   50.29   13.60
   5  10   6   53.09   17.00
  -5  10  -6   40.60   24.30
   5 -10   6   58.59   14.60
  -5 -10  -6   70.59   11.40
  -5  10  -7   10.50   21.80
   5  10   7   15.40   15.10
   5 -10   7   19.50   11.90
   5  10   8   25.90   16.20
  -5  10  -8    3.70   23.20
   5 -10   8    2.40   11.80
   5  10   9   67.59   18.20
   5 -10   9   95.19   17.20
   5  10  10   85.99   20.20
   5 -10  10   36.80   15.00
  -5  11   9  -18.70   11.40
  -5 -11   9    2.10   10.20
   5  11  -8   11.40   18.30
  -5  11   8   -8.70   11.20
  -5 -11   8   10.20    9.20
  -5 -11   8   15.80   13.80
   5  11  -7  140.99   25.70
  -5  11   7  102.59   15.30
  -5 -11   7   93.99   17.90
  -5 -11   7   95.09   14.40
  -5  11   6   24.00   12.10
   5  11  -6   26.30   18.00
  -5 -11   6   26.90   10.50
  -5 -11   6   17.00   12.40
   5  11  -5  338.07   34.00
  -5  11   5  367.16   23.60
  -5 -11   5  325.07   22.10
  -5  11   4  156.28   17.00
   5  11  -4  182.08   25.90
  -5 -11   4  139.39   15.70
  -5  11   3  243.38   19.50
   5  11  -3  251.37   29.60
  -5 -11   3  256.57   18.50
   5  11  -2  -22.50   13.30
  -5  11   2   -2.90    9.50
  -5 -11   2    0.50    7.40
   5  11  -1  302.87   31.10
  -5  11   1  256.97   18.90
  -5 -11   1  227.48   17.60
  -5  11   0   30.40   10.50
   5  11   0   41.60   17.70
  -5 -11   0   37.20    9.90
   5  11   1  186.28   25.70
  -5 -11  -1  186.58   17.60
   5  11   2   26.70   15.90
  -5 -11  -2   14.60    8.80
   5  11   3   59.39   19.00
  -5 -11  -3   81.19   12.60
   5  11   4   72.49   19.50
  -5 -11  -4   49.60   11.10
   5 -11   4   38.70   14.50
   5  11   5   -1.40   15.00
   5 -11   5    9.70   12.90
  -5 -11  -5   -2.80    8.30
   5  11   6   75.69   20.00
   5 -11   6   46.10   15.30
   5  11   7  156.48   23.90
   5 -11   7   86.19   18.40
   5 -11   8    9.20   13.80
  -5  12   6   35.90   13.60
  -5  12   5   42.50   13.30
  -5  12   4   24.00   12.40
   5  12  -4   61.89   21.00
  -5 -12   4   42.90   12.10
  -5  12   3   61.59   14.10
   5  12  -3   71.79   21.30
  -5 -12   3   72.89   13.20
   5  12  -2  129.19   23.60
  -5 -12   2   92.69   14.00
   5  12  -1  128.49   23.20
  -5 -12   1   89.39   13.90
   5  12   0  127.09   24.00
  -5 -12   0  146.89   16.90
   5  12   1    6.00   16.60
  -5 -12  -1    2.40    8.60
   5  12   2   30.30   18.70
  -5 -12  -2   37.70   11.20
   5  12   3  214.08   28.70
  -5 -12  -3  245.98   21.10
  -5 -12  -4   94.69   14.50
  -6   0  18   44.10   12.40
  -6   0  17    2.80    9.70
  -6   0  16   24.60   10.20
  -6   0  15    9.80    8.30
  -6   0  14   63.19   10.30
  -6   0  13    0.80    6.40
  -6   0  12  112.19   11.70
  -6   0  11    6.60    5.30
  -6   0  11   -3.40    4.30
  -6   0  10  317.67   18.90
  -6   0  10  326.57   17.20
  -6   0   9   -2.70    3.80
  -6   0   9    1.60    4.40
  -6   0   9   -2.40    3.90
  -6   0   8 1840.92   62.89
  -6   0   8 1901.01   66.19
  -6   0   8 1781.82   71.39
  -6   0   7    0.60    3.60
   6   0  -7   -0.20    4.50
  -6   0   7   -6.70    3.40
  -6   0   7    5.10    3.60
   6   0  -6  596.64   28.80
  -6   0   6  582.04   23.20
  -6   0   6  593.04   26.40
  -6   0   6  575.34   22.80
  -6   0   5    0.10    3.40
  -6   0   5   -1.60    3.30
  -6   0   5    0.20    2.50
  -6   0   5   -4.00    2.80
  -6   0   5    3.80    3.50
  -6   0   4  695.23   29.50
  -6   0   4  687.13   25.90
  -6   0   4  786.52   31.00
  -6   0   4  686.83   28.80
  -6   0   4  710.13   27.00
  -6   0   3   -2.70    3.40
  -6   0   3    1.50    3.10
  -6   0   3    1.60    2.70
  -6   0   3    1.60    3.10
  -6   0   3    1.80    2.00
  -6   0   2   84.79    7.50
  -6   0   2   74.49    7.20
  -6   0   2   63.19    6.10
  -6   0   2   79.79    7.40
  -6   0   1    1.60    2.80
  -6   0   1   -0.80    2.30
  -6   0   1    0.30    3.60
  -6   0   1   -2.60    3.80
  -6   0   0 6144.49  222.58
  -6   0   0 6214.08  217.88
  -6   0   0 6115.99  203.38
  -6   0  -1    0.30    4.40
  -6   0  -1   -1.80    4.30
  -6   0  -2  268.37   14.10
  -6   0  -2  252.17   14.70
  -6   0  -3    5.10    5.00
  -6   0  -3   -3.80    4.20
  -6   0  -4   84.09    9.80
  -6   0  -4   85.49   10.10
  -6   0  -4   86.49    5.40
  -6   0  -4   93.29    5.30
  -6   0  -5    1.70    2.50
   6   0   5    3.20    2.80
  -6   0  -5    2.50    2.50
  -6   0  -5   -1.40    5.30
  -6   0  -6 1389.16   55.99
  -6   0  -6 1590.44   56.39
   6   0   6 1469.85   52.49
   6   0   7   -0.80    3.60
  -6   0  -7    0.00    3.70
  -6   0  -7   -5.70    3.30
  -6   0  -8 1960.00   75.29
  -6   0  -8 2067.29   75.29
   6   0   8 1798.52   68.59
  -6   0  -9   -0.60    5.10
   6   0   9    0.50    4.50
  -6   0 -10  256.47   18.80
  -6   0 -11    0.10    7.00
  -6   0 -12  452.55   29.70
  -6   0 -13   -4.00    9.10
  -6   0 -14   93.39   17.30
  -6   0 -15  -14.20   11.30
  -6   0 -16   69.79   19.40
  -6   0 -17  -23.40   15.20
  -6   1  18  164.88   18.30
  -6  -1  18  104.39   16.20
  -6   1  17   -0.10    9.70
  -6  -1  17   -8.60    9.20
  -6   1  16   19.80   10.00
  -6  -1  16   56.19   11.70
  -6   1  15   31.30    9.60
  -6  -1  15   36.80    9.50
  -6   1  14  438.86   24.30
  -6  -1  14  468.05   25.00
  -6   1  13   25.70    8.00
  -6  -1  13   33.50    8.40
  -6   1  12   91.09   10.60
  -6  -1  12   91.09   10.90
  -6   1  11   66.69    8.90
  -6   1  11   74.89   10.30
  -6  -1  11   57.59    8.70
  -6   1  10   50.99    8.80
  -6   1  10   48.30    7.50
  -6  -1  10   41.00    6.80
  -6  -1  10   32.50    6.90
  -6   1   9  119.09   10.20
  -6   1   9  124.89   12.70
  -6  -1   9  117.99   10.30
  -6  -1   9  118.49   11.00
  -6  -1   9  123.89    8.10
  -6   1   8  329.77   19.50
  -6   1   8  305.17   15.70
  -6  -1   8  330.07   14.40
  -6  -1   8  353.46   16.60
  -6  -1   8  334.57   17.40
  -6   1   7   14.60    5.70
  -6   1   7   15.30    4.30
   6   1  -7   21.10    7.10
  -6  -1   7   24.30    5.00
   6  -1  -7   14.50    5.90
  -6  -1   7   21.80    4.80
  -6  -1   7   26.60    4.60
  -6   1   6  237.48   12.00
  -6   1   6  248.28   15.70
  -6   1   6  255.37   13.30
   6   1  -6  253.47   17.70
  -6  -1   6  259.07   12.60
  -6  -1   6  246.88   13.50
  -6  -1   6  245.38   12.00
   6  -1  -6  239.58   15.60
  -6   1   5  999.70   40.70
  -6   1   5 1000.40   43.40
  -6   1   5 1029.70   37.50
  -6   1   5 1092.09   42.10
  -6   1   5 1007.30   38.00
  -6  -1   5 1140.49   45.00
  -6  -1   5 1026.80   37.30
  -6  -1   5 1039.20   41.00
  -6  -1   5 1077.09   38.20
  -6   1   4 5029.70  175.88
  -6   1   4 5226.58  191.88
  -6   1   4 5661.33  191.38
  -6   1   4 5191.28  192.98
  -6   1   4 5221.98  178.28
  -6  -1   4 5300.57  175.18
  -6  -1   4 5326.07  190.38
  -6  -1   4 5698.83  194.18
  -6  -1   4 5275.07  178.98
  -6  -1   4 5303.97  192.18
  -6   1   3  339.87   15.50
  -6   1   3  309.67   17.20
  -6   1   3  319.77   15.70
  -6   1   3  319.97   12.20
  -6   1   3  309.27   15.40
  -6  -1   3  328.17   14.30
  -6  -1   3  317.27   12.90
  -6  -1   3  349.37   18.20
  -6  -1   3  318.67   15.20
  -6  -1   3  317.87   14.50
  -6   1   2  797.02   29.90
  -6   1   2  706.33   31.00
  -6   1   2  708.63   31.80
  -6   1   2  769.12   29.80
  -6  -1   2  813.02   32.90
  -6  -1   2  748.23   30.60
  -6  -1   2  733.73   28.30
  -6  -1   2  763.42   29.10
  -6   1   1   20.40    5.20
  -6   1   1   19.10    3.10
  -6   1   1   19.20    5.10
  -6   1   1   18.30    5.70
  -6  -1   1   20.40    4.50
  -6  -1   1   26.00    5.50
  -6  -1   1   24.20    2.80
  -6  -1   1   25.90    4.90
  -6   1   0    0.50    4.40
  -6   1   0   -5.40    4.20
  -6   1   0   -3.50    3.70
  -6   1   0    0.30    1.70
  -6  -1   0   -3.00    3.50
  -6  -1   0   -0.40    1.40
  -6  -1   0   -3.30    4.20
  -6  -1   0    0.20    3.70
  -6   1  -1   66.99    8.40
  -6   1  -1  104.19    9.70
  -6  -1  -1   84.59    4.10
  -6  -1  -1   86.99    8.70
  -6  -1  -1   94.69    8.30
  -6  -1  -1   91.19    8.00
  -6   1  -2 1095.99   45.10
  -6  -1  -2 1144.29   41.00
  -6  -1  -2 1105.59   39.80
  -6  -1  -2 1068.59   44.50
  -6  -1  -2 1143.69   42.80
  -6   1  -3  511.15   20.30
  -6   1  -3  536.25   25.30
  -6  -1  -3  551.24   22.50
  -6  -1  -3  557.24   22.70
  -6  -1  -3  515.95   24.40
  -6  -1  -3  517.45   19.80
   6   1   4 4358.06  143.89
  -6   1  -4 4176.78  151.78
  -6   1  -4 4309.37  150.28
  -6   1  -4 4072.89  157.38
  -6  -1  -4 4245.08  150.78
  -6  -1  -4 4292.57  142.79
   6  -1   4 4131.29  141.89
  -6  -1  -4 4390.86  153.28
  -6   1  -5  170.78    8.20
   6   1   5  172.08   10.20
  -6   1  -5  163.38   10.20
   6  -1   5  161.98    7.90
  -6  -1  -5  153.08   13.80
  -6  -1  -5  175.28   11.50
  -6  -1  -5  166.48   12.20
  -6  -1  -5  168.18    9.00
   6   1   6    2.60    4.20
  -6   1  -6    9.40    4.40
  -6   1  -6   12.10    3.10
  -6  -1  -6    9.30    5.00
   6  -1   6   13.30    3.20
  -6  -1  -6    8.60    3.30
  -6  -1  -6   -0.90    5.80
   6   1   7   79.79    8.30
  -6   1  -7   75.89    7.00
  -6   1  -7   61.59    8.20
  -6  -1  -7   79.29    9.70
   6  -1   7   73.39    6.30
  -6  -1  -7   66.69    7.30
  -6  -1  -7   61.09    9.50
  -6   1  -8  802.82   36.80
   6   1   8  791.72   32.80
  -6   1  -8  903.31   34.80
   6  -1   8  798.42   31.10
  -6  -1  -8  771.72   35.00
   6   1   9  354.56   18.00
  -6   1  -9  307.67   20.90
  -6  -1  -9  341.87   20.00
  -6   1 -10  520.95   28.90
  -6  -1 -10  463.25   26.70
  -6   1 -11   20.30    9.40
  -6  -1 -11   12.60    8.20
  -6   1 -12  387.36   28.40
  -6  -1 -12  423.66   27.60
  -6   1 -13    3.60   10.30
  -6  -1 -13    8.00   10.00
  -6   1 -14  260.27   27.30
  -6  -1 -14  330.77   27.70
  -6   1 -15   -4.60   12.50
  -6  -1 -15   20.90   13.90
  -6   1 -16  104.49   22.10
  -6  -1 -16  127.69   22.00
  -6   1 -17    4.80   18.00
  -6  -1 -17   22.60   18.20
  -6   2  18  419.16   27.50
  -6  -2  18  386.96   27.10
  -6   2  17    3.90    9.60
  -6  -2  17    4.20    9.60
  -6   2  16   47.20   11.30
  -6  -2  16   67.99   13.10
  -6   2  15   -0.60    8.00
  -6  -2  15    5.10    8.00
  -6   2  14    5.90    7.50
  -6  -2  14    9.70    7.80
  -6   2  13   17.50    7.80
  -6  -2  13    6.00    7.30
  -6   2  12  318.67   19.00
  -6  -2  12  352.76   19.60
  -6   2  11   53.79    8.60
  -6  -2  11   68.89    9.20
  -6   2  10  762.02   32.60
  -6   2  10  733.03   37.90
  -6  -2  10  799.52   33.30
  -6  -2  10  830.52   34.50
  -6  -2  10  799.42   29.50
  -6   2   9   70.79   10.90
  -6   2   9   59.29    7.80
  -6  -2   9   86.79    8.70
  -6  -2   9   80.09    7.20
  -6  -2   9   77.29    8.70
  -6   2   8  475.05   21.80
  -6   2   8  497.75   21.20
  -6   2   8  489.15   26.80
  -6  -2   8  486.35   19.50
  -6  -2   8  458.45   21.60
  -6  -2   8  473.05   22.30
  -6   2   7  101.89    8.10
  -6   2   7  112.89    8.50
  -6   2   7  128.09   13.80
  -6  -2   7   90.09    8.60
  -6  -2   7   84.59    8.00
  -6  -2   7   89.19    7.60
   6   2  -6  442.86   25.00
  -6   2   6  391.96   17.00
  -6   2   6  367.66   17.90
  -6   2   6  377.66   22.80
  -6  -2   6  399.46   16.80
  -6  -2   6  404.26   17.90
   6  -2  -6  386.06   20.60
  -6  -2   6  410.96   18.50
  -6   2   5  112.09   12.80
  -6   2   5  129.09    9.40
  -6   2   5  139.49    9.10
   6   2  -5  119.09   14.10
  -6   2   5  136.89    7.90
  -6  -2   5  117.49    8.20
  -6  -2   5  121.29    8.30
  -6  -2   5  127.29    8.80
  -6   2   4  451.65   19.30
  -6   2   4  419.16   19.20
  -6   2   4  425.06   16.80
  -6   2   4  448.56   24.00
  -6  -2   4  421.76   17.70
  -6  -2   4  412.96   17.80
  -6  -2   4  415.56   18.40
  -6  -2   4  436.46   24.00
  -6   2   3  237.08   12.30
  -6   2   3  265.57   13.90
  -6   2   3  243.78   10.20
  -6   2   3  266.37   17.50
  -6  -2   3  259.57   11.90
  -6  -2   3  278.87   17.50
  -6  -2   3  244.28   12.10
  -6  -2   3  252.27   13.00
  -6  -2   3  262.17   11.70
  -6   2   2   24.90    7.00
  -6   2   2   26.60    5.40
  -6   2   2   28.40    3.60
  -6  -2   2   18.30    4.20
  -6  -2   2   18.40    4.20
  -6  -2   2   15.50    2.70
  -6  -2   2   23.10    3.40
  -6  -2   2   26.20    7.00
  -6   2   1 1817.12   65.69
  -6   2   1 1734.13   68.59
  -6   2   1 1759.32   71.39
  -6  -2   1 1924.61   71.99
  -6  -2   1 1783.82   65.39
  -6  -2   1 1808.32   62.39
  -6  -2   1 1836.12   67.99
  -6   2   0 4839.22  178.98
  -6   2   0 4817.72  178.28
  -6   2   0 5070.09  173.68
  -6  -2   0 5097.09  180.08
  -6  -2   0 4842.62  162.08
  -6  -2   0 4752.22  173.48
   6  -2   0 4889.71  164.38
  -6  -2   0 4905.91  177.88
  -6   2  -1  681.43   24.90
  -6   2  -1  647.14   29.20
  -6   2  -1  673.83   29.30
  -6  -2  -1  657.43   25.90
  -6  -2  -1  703.03   28.60
  -6  -2  -1  656.23   24.90
   6  -2   1  629.04   23.40
  -6  -2  -1  692.33   31.80
  -6   2  -2   14.50    4.50
  -6   2  -2   11.40    2.00
  -6   2  -2   16.30    5.90
  -6  -2  -2    5.70    3.80
  -6  -2  -2    3.60    5.60
   6  -2   2   11.40    1.70
  -6  -2  -2   10.40    1.90
  -6  -2  -2    3.40    4.50
  -6   2  -3    9.30    6.30
   6   2   3   16.40    4.60
  -6   2  -3   10.60    1.80
  -6   2  -3   19.00    4.70
  -6  -2  -3   13.50    4.50
   6  -2   3   11.10    1.90
  -6  -2  -3   11.40    2.30
  -6  -2  -3   15.30    6.50
  -6  -2  -3    9.90    5.10
  -6   2  -4  407.86   16.30
  -6   2  -4  409.36   20.00
   6   2   4  425.06   19.10
   6  -2   4  402.06   15.50
  -6  -2  -4  421.46   18.80
  -6  -2  -4  437.86   21.10
  -6  -2  -4  403.56   16.90
  -6  -2  -4  405.46   22.90
  -6   2  -5  690.63   30.20
   6   2   5  658.23   28.10
  -6   2  -5  718.83   26.20
  -6  -2  -5  660.73   26.80
  -6  -2  -5  707.53   31.00
  -6  -2  -5  639.54   27.60
  -6  -2  -5  672.43   32.50
   6  -2   5  655.93   24.70
   6   2   6  611.94   26.30
  -6   2  -6  613.04   28.70
  -6   2  -6  622.64   24.30
  -6  -2  -6  596.04   30.60
   6  -2   6  574.04   22.80
  -6  -2  -6  570.44   25.80
  -6  -2  -6  617.14   25.40
  -6   2  -7  617.04   30.50
  -6   2  -7  632.34   26.00
   6   2   7  635.74   27.50
  -6  -2  -7  610.84   27.20
  -6  -2  -7  652.83   27.80
  -6  -2  -7  639.64   32.70
   6  -2   7  601.24   24.20
  -6   2  -8 1327.47   56.19
   6   2   8 1289.27   50.29
  -6  -2  -8 1265.87   49.70
   6  -2   8 1296.87   47.30
  -6  -2  -8 1322.07   52.49
  -6   2  -9  259.47   19.80
   6   2   9  268.17   16.70
  -6  -2  -9  250.37   16.80
   6   2  10  302.87   18.50
  -6   2 -10  311.47   23.10
  -6  -2 -10  282.37   19.50
  -6   2 -11   -2.90    8.50
  -6  -2 -11    3.80    7.40
  -6   2 -12  341.57   28.20
  -6  -2 -12  406.96   27.00
  -6   2 -13  188.08   23.60
  -6  -2 -13  102.39   16.60
  -6   2 -14    0.90   12.00
  -6  -2 -14   10.30   11.80
  -6   2 -15   38.00   17.20
  -6  -2 -15   39.50   14.40
  -6   2 -16  -20.40   15.20
  -6  -2 -16   19.30   15.40
  -6  -2 -17   -0.50   16.20
  -6   3  17   21.40   11.30
  -6  -3  17   20.40   10.80
  -6   3  16   58.29   12.20
  -6  -3  16   83.09   13.80
  -6   3  15    3.80    8.80
  -6  -3  15   21.10    9.30
  -6   3  14  653.33   32.50
  -6  -3  14  721.13   33.90
  -6   3  13   63.19   10.40
  -6  -3  13   54.59   10.10
  -6   3  12   23.50    8.10
  -6  -3  12   28.80    8.10
  -6   3  11    3.70    5.40
  -6   3  11    6.40    6.30
  -6  -3  11    3.20    5.80
  -6   3  10   15.60    8.60
  -6   3  10   24.10    5.90
  -6   3  10   20.10    6.70
  -6  -3  10   35.20    6.00
  -6  -3  10   37.70    5.70
  -6  -3  10   28.80    7.30
  -6   3   9   44.30   10.50
  -6   3   9   42.80    6.60
  -6   3   9   46.80    7.30
  -6  -3   9   48.60    6.20
  -6  -3   9   38.30    7.40
  -6  -3   9   46.30    6.60
  -6   3   8 1133.99   43.00
  -6   3   8 1131.69   44.10
  -6   3   8 1041.40   51.29
  -6  -3   8 1103.59   43.70
  -6  -3   8 1167.28   45.00
  -6  -3   8 1140.69   40.80
  -6   3   7   16.40    5.10
  -6   3   7   22.80    8.90
  -6   3   7   21.30    4.70
  -6  -3   7   18.70    4.50
  -6  -3   7   13.20    3.90
  -6  -3   7   15.40    5.20
  -6   3   6  891.71   36.50
  -6   3   6  883.91   34.60
  -6   3   6  941.81   44.50
  -6  -3   6  906.21   36.50
  -6  -3   6  958.60   34.10
  -6  -3   6  926.81   36.00
  -6   3   5   67.59   11.70
  -6   3   5   85.99    7.00
   6   3  -5   59.19   11.00
  -6   3   5   72.89    7.50
  -6  -3   5   71.39    7.00
  -6  -3   5   64.79    6.20
  -6  -3   5   58.19    7.20
  -6   3   4 1193.58   46.80
  -6   3   4 1195.58   42.70
  -6   3   4 1233.98   46.10
  -6   3   4 1192.88   53.79
  -6  -3   4 1187.78   45.50
  -6  -3   4 1158.28   44.00
  -6  -3   4 1205.88   43.00
  -6   3   3  690.83   28.20
  -6   3   3  726.13   35.70
  -6   3   3  665.03   24.50
  -6   3   3  688.73   27.00
  -6  -3   3  635.34   26.50
  -6  -3   3  655.43   25.80
  -6  -3   3  635.24   27.70
  -6  -3   3  750.02   35.30
  -6  -3   3  635.74   26.10
  -6   3   2   68.09    7.50
  -6   3   2   47.60   10.50
  -6   3   2   78.49    6.00
  -6   3   2   63.09    4.20
  -6  -3   2   47.80    5.60
  -6  -3   2   56.49   10.40
  -6  -3   2   64.49    6.50
  -6  -3   2   63.39    6.60
  -6  -3   2   48.20    4.80
  -6   3   1  120.69    9.60
  -6   3   1  121.09    7.50
  -6   3   1  130.29   15.10
  -6  -3   1  131.79    7.20
   6  -3  -1  150.88    9.80
  -6  -3   1  136.39   14.80
  -6  -3   1  123.29    8.60
  -6  -3   1  141.39    8.90
  -6   3   0  557.04   24.30
  -6   3   0  541.95   28.80
  -6   3   0  536.15   20.80
  -6  -3   0  506.85   28.60
  -6  -3   0  480.65   21.00
  -6  -3   0  492.85   20.50
   6  -3   0  519.25   21.10
  -6  -3   0  505.35   22.80
  -6   3  -1  976.50   37.80
  -6   3  -1  879.91   33.20
  -6   3  -1  817.82   39.90
  -6  -3  -1  898.11   42.30
   6  -3   1  845.22   32.20
  -6  -3  -1  853.61   33.10
  -6  -3  -1  888.81   35.90
  -6  -3  -1  875.21   32.90
  -6   3  -2  225.78   16.00
  -6   3  -2  225.18   16.60
  -6   3  -2  230.88   10.90
  -6   3  -2  249.58   10.70
  -6  -3  -2  235.98   13.70
  -6  -3  -2  248.08   20.00
  -6  -3  -2  242.78   11.00
   6  -3   2  248.78   11.00
  -6  -3  -2  224.28   11.00
  -6  -3  -2  249.38   12.60
  -6   3  -3 1034.90   46.90
  -6   3  -3 1104.29   41.00
   6   3   3 1115.99   43.60
   6  -3   3 1077.89   39.20
  -6  -3  -3 1136.59   44.30
  -6  -3  -3 1118.19   41.60
  -6  -3  -3 1137.09   51.19
  -6  -3  -3 1116.99   40.70
  -6   3  -4 1200.28   52.59
   6   3   4 1259.17   48.70
  -6   3  -4 1323.87   46.80
  -6  -3  -4 1214.28   45.60
   6  -3   4 1250.37   44.50
  -6  -3  -4 1286.47   50.29
  -6  -3  -4 1288.57   57.09
  -6  -3  -4 1237.38   47.30
  -6   3  -5  584.84   30.60
  -6   3  -5  668.33   25.20
   6   3   5  621.64   28.10
  -6  -3  -5  648.14   35.30
  -6  -3  -5  626.64   25.90
  -6  -3  -5  626.64   25.80
  -6  -3  -5  612.34   28.50
   6  -3   5  630.14   24.10
  -6   3  -6  216.38   11.10
   6   3   6  207.18   15.10
  -6   3  -6  188.68   16.20
   6  -3   6  215.98   11.00
  -6  -3  -6  204.58   11.90
  -6  -3  -6  221.28   21.20
  -6  -3  -6  224.28   13.20
  -6   3  -7   29.20    8.70
   6   3   7   22.90    7.40
   6  -3   7   17.10    4.30
  -6  -3  -7    6.10    4.20
  -6  -3  -7   30.80    7.10
   6   3   8  354.16   21.40
  -6   3  -8  367.36   24.80
  -6  -3  -8  410.96   20.60
  -6  -3  -8  416.96   20.50
   6  -3   8  359.96   17.30
  -6   3  -9  417.76   27.70
   6   3   9  423.76   23.20
  -6  -3  -9  429.56   22.20
  -6  -3  -9  385.36   22.40
  -6   3 -10    1.80    8.30
   6   3  10   19.30    8.00
  -6  -3 -10    8.30    6.60
  -6   3 -11  178.58   21.80
  -6  -3 -11  223.48   18.50
  -6   3 -12   27.40   13.10
  -6  -3 -12   12.50    9.50
  -6   3 -13   25.50   14.00
  -6  -3 -13   22.90   11.30
  -6   3 -14  283.07   31.60
  -6  -3 -14  255.47   26.60
  -6   3 -15   -7.60   14.50
  -6  -3 -15    0.50   12.50
  -6   3 -16   66.59   22.50
  -6  -3 -16   69.09   19.00
  -6   4  17   44.70   12.60
  -6  -4  17   71.99   14.30
  -6   4  16   61.09   12.90
  -6  -4  16   65.79   13.70
  -6   4  15   53.29   12.00
  -6  -4  15   34.80   11.20
  -6   4  14   15.20    9.10
  -6  -4  14   31.20   10.30
  -6   4  13   95.29   12.60
  -6  -4  13  124.29   14.00
  -6   4  12  440.56   23.30
  -6  -4  12  423.96   24.10
  -6   4  11  179.38   14.20
  -6  -4  11  196.48   15.20
  -6   4  10 1135.99   54.29
  -6   4  10 1095.19   44.00
  -6  -4  10 1096.29   40.50
  -6  -4  10 1063.69   44.70
  -6   4   9   15.80    5.10
  -6   4   9   11.40    6.30
  -6   4   9   32.20   11.20
  -6  -4   9   19.90    6.70
  -6  -4   9   13.30    4.40
  -6  -4   9   21.10    5.20
  -6   4   8   65.69    8.40
  -6   4   8   53.89    6.90
  -6   4   8   75.39   13.80
  -6  -4   8   64.89    8.90
  -6  -4   8   78.59    7.90
  -6  -4   8   52.49    6.60
  -6   4   7  352.26   16.80
  -6   4   7  357.96   17.10
  -6   4   7  321.37   25.20
  -6  -4   7  324.97   15.90
  -6  -4   7  322.67   16.60
  -6  -4   7  320.17   17.80
  -6   4   6   47.30    6.60
  -6   4   6   40.00   11.00
  -6   4   6   46.40    6.50
  -6  -4   6   69.79    8.40
  -6  -4   6   55.99    6.70
  -6  -4   6   54.79    6.30
  -6   4   5  764.22   32.40
  -6   4   5  900.81   43.80
  -6   4   5  749.53   30.60
  -6  -4   5  799.12   32.50
  -6  -4   5  816.32   30.80
  -6  -4   5  812.72   32.30
  -6   4   4 1602.44   68.59
  -6   4   4 1563.44   53.79
  -6   4   4 1493.15   57.49
  -6  -4   4 1424.06   56.59
  -6  -4   4 1470.25   53.39
  -6  -4   4 1524.95   55.69
  -6   4   3   39.90    5.10
  -6   4   3   46.10    6.50
  -6   4   3   54.59   12.40
  -6   4   3   43.60    5.00
  -6  -4   3   45.40    6.20
  -6  -4   3   51.79    6.40
  -6  -4   3   48.10    5.10
  -6  -4   3   45.20    6.70
  -6   4   2 1339.47   46.90
  -6   4   2 1305.27   61.29
  -6   4   2 1328.17   51.99
  -6   4   2 1338.47   50.59
  -6  -4   2 1302.37   50.19
  -6  -4   2 1430.06   61.49
  -6  -4   2 1322.57   49.30
  -6  -4   2 1314.57   51.39
  -6  -4   2 1394.06   48.30
  -6   4   1  325.37   15.30
  -6   4   1  342.97   17.60
  -6   4   1  337.87   13.20
  -6   4   1  313.47   24.60
  -6  -4   1  343.27   15.20
  -6  -4   1  341.37   16.20
  -6  -4   1  343.87   24.90
   6  -4  -1  380.66   18.00
  -6  -4   1  306.57   15.40
  -6   4   0  597.24   27.70
  -6   4   0  612.24   34.80
  -6   4   0  638.64   24.90
  -6  -4   0  619.14   26.20
  -6  -4   0  593.24   24.60
  -6  -4   0  664.03   35.90
  -6  -4   0  598.14   24.50
   6  -4   0  588.84   25.80
  -6   4  -1  478.75   19.60
  -6   4  -1  445.86   28.40
  -6  -4  -1  468.35   21.40
  -6  -4  -1  452.75   29.80
  -6  -4  -1  444.76   19.80
  -6  -4  -1  450.45   19.20
   6  -4   1  459.95   20.20
  -6   4  -2   68.39    5.50
   6   4   2   77.99   10.70
  -6   4  -2   75.99   12.60
  -6  -4  -2   82.39    8.00
  -6  -4  -2   62.29    7.70
  -6  -4  -2   64.59    6.00
   6  -4   2   63.59    6.80
  -6  -4  -2   79.49   14.50
  -6   4  -3  146.09    8.10
  -6   4  -3  147.29   16.20
   6   4   3  142.99   13.80
  -6  -4  -3  127.19    9.50
   6  -4   3  151.08    9.20
  -6  -4  -3  128.09    8.40
  -6  -4  -3  131.89   18.40
  -6  -4  -3  133.19   10.40
  -6   4  -4    4.70    7.20
   6   4   4   15.60    7.40
  -6   4  -4   23.80    3.70
  -6  -4  -4   10.80    5.40
  -6  -4  -4   24.30    5.30
  -6  -4  -4   18.20    4.00
  -6  -4  -4    8.20    9.30
   6  -4   4   30.00    4.90
  -6   4  -5  576.14   33.00
  -6   4  -5  642.04   25.20
   6   4   5  635.64   29.50
  -6  -4  -5  613.54   25.40
  -6  -4  -5  570.24   25.60
   6  -4   5  578.54   24.50
  -6  -4  -5  628.24   27.90
  -6   4  -6  103.89   14.90
   6   4   6  146.69   14.20
  -6  -4  -6  136.89   10.50
   6  -4   6  114.99    8.90
  -6  -4  -6  137.59    9.80
  -6   4  -7  349.67   26.20
   6   4   7  433.96   23.60
  -6  -4  -7  436.76   19.90
   6  -4   7  392.86   18.60
  -6  -4  -7  401.36   20.40
   6   4   8   67.29   11.90
  -6   4  -8   59.49   13.10
  -6  -4  -8   60.79    8.60
  -6  -4  -8   59.39    9.10
   6  -4   8   64.29    7.80
  -6   4  -9   25.30   11.40
   6   4   9   25.10    9.60
  -6  -4  -9   14.60    6.60
   6   4  10  353.06   23.50
  -6   4 -10  339.77   28.40
  -6  -4 -10  360.96   22.60
  -6   4 -11  150.68   22.10
   6   4  11  146.59   17.00
  -6  -4 -11  138.89   16.00
  -6   4 -12  137.89   22.10
  -6  -4 -12  120.29   16.10
  -6   4 -13  118.29   22.70
  -6  -4 -13  124.79   18.20
  -6   4 -14   -0.20   15.10
  -6  -4 -14    3.60   11.60
  -6   4 -15  -23.30   14.80
  -6  -4 -15   -6.50   13.10
  -6   4 -16   29.00   20.80
  -6  -4 -16   13.80   15.20
  -6   5  16  125.49   16.90
  -6  -5  16  165.38   19.10
  -6   5  15  197.08   19.00
  -6  -5  15  196.48   20.10
  -6   5  14  598.34   31.20
  -6  -5  14  620.34   33.10
  -6   5  13  157.58   15.60
  -6  -5  13  166.78   17.40
  -6   5  12   -0.30    7.40
  -6  -5  12    4.40    7.60
  -6   5  11    3.10    7.40
  -6  -5  11   -8.90    4.70
  -6  -5  11   -6.80    6.30
  -6   5  10    6.70    6.90
  -6  -5  10    1.10    7.10
  -6  -5  10   12.30    5.60
  -6   5   9  712.13   42.30
  -6   5   9  667.43   30.90
  -6  -5   9  720.93   29.30
  -6  -5   9  752.62   33.10
  -6   5   8  342.77   28.60
  -6   5   8  387.86   19.40
  -6  -5   8  368.16   18.00
  -6  -5   8  360.96   20.70
  -6  -5   8  369.76   18.60
  -6   5   7  484.75   21.80
  -6   5   7  415.76   31.30
  -6  -5   7  429.86   22.80
  -6  -5   7  447.56   20.40
  -6  -5   7  465.65   21.30
  -6   5   6  998.60   38.10
  -6   5   6  915.61   50.69
  -6   5   6  942.41   38.30
  -6  -5   6 1008.20   40.10
  -6  -5   6  973.80   37.20
  -6  -5   6  966.80   39.00
  -6   5   5   16.50    5.20
  -6   5   5   15.90    4.80
  -6   5   5   17.70   11.30
  -6  -5   5   12.40    3.70
  -6  -5   5    6.80    5.60
  -6  -5   5   13.60    4.80
  -6   5   4  413.36   19.20
  -6   5   4  391.36   30.20
  -6   5   4  411.76   18.80
  -6  -5   4  433.56   19.20
  -6  -5   4  410.26   18.90
  -6  -5   4  423.06   21.00
  -6   5   3  533.05   35.30
  -6   5   3  542.55   22.00
  -6   5   3  524.45   23.60
  -6  -5   3  523.65   22.60
  -6  -5   3  521.65   24.10
  -6  -5   3  531.75   22.80
  -6  -5   3  521.15   23.60
  -6   5   2   18.10    4.40
  -6   5   2   29.90   11.50
  -6   5   2   33.80    6.70
  -6  -5   2   19.10    3.80
  -6  -5   2   22.70    5.00
  -6  -5   2   15.50    5.00
  -6  -5   2   12.70    5.40
  -6   5   1  691.93   40.60
  -6   5   1  673.23   25.50
  -6  -5   1  671.23   27.30
  -6  -5   1  681.33   27.50
  -6  -5   1  657.53   28.10
  -6   5   0  110.89    6.70
  -6   5   0  119.39   17.80
  -6  -5   0   98.49    8.90
  -6  -5   0   89.59    7.20
  -6  -5   0  106.19    9.50
   6  -5   0  112.19   11.00
   6   5   1  133.49   14.90
  -6   5  -1   92.29    5.80
  -6   5  -1   89.39   16.20
  -6  -5  -1  113.79    8.00
   6  -5   1  108.19   10.60
  -6  -5  -1  110.99    9.70
  -6  -5  -1  119.89    8.00
  -6  -5  -1  103.99    9.50
  -6   5  -2   16.20   10.00
   6   5   2   27.60    9.00
  -6  -5  -2   18.20    4.00
  -6  -5  -2   19.30    5.40
   6  -5   2   14.50    5.40
  -6  -5  -2   21.50    5.50
   6   5   3  186.08   17.10
  -6   5  -3  164.48   20.10
  -6  -5  -3  151.28   10.00
   6  -5   3  178.28   11.80
  -6  -5  -3  171.98   11.40
  -6  -5  -3  163.18   11.00
   6   5   4  257.77   19.00
  -6   5  -4  261.77   25.20
  -6  -5  -4  257.37   14.10
  -6  -5  -4  290.27   14.70
  -6  -5  -4  248.78   14.50
   6  -5   4  276.57   14.90
   6   5   5   -3.40    7.70
  -6   5  -5    3.20    8.60
  -6  -5  -5    4.40    5.80
  -6  -5  -5    3.20    3.50
  -6  -5  -5   -3.20    4.50
   6  -5   5    7.60    5.00
  -6   5  -6  165.88   20.70
   6   5   6  201.28   18.20
  -6  -5  -6  176.18   12.10
   6  -5   6  194.58   12.70
  -6  -5  -6  189.38   12.50
   6   5   7   60.79   11.80
  -6   5  -7   56.29   14.10
  -6  -5  -7   47.20    7.30
  -6  -5  -7   44.40    8.10
   6  -5   7   60.09    7.90
  -6   5  -8   57.09   14.80
   6   5   8   61.39   12.30
  -6  -5  -8   55.19    8.70
   6  -5   8   58.39    8.40
  -6  -5  -8   63.29    9.20
  -6   5  -9  368.56   30.80
   6   5   9  443.76   26.10
  -6  -5  -9  381.06   22.60
   6   5  10   14.40   10.40
  -6   5 -10   -7.60   11.40
  -6  -5 -10    0.50    6.70
   6   5  11    4.40   10.20
  -6   5 -11   -9.80   11.60
  -6  -5 -11   -1.90    7.90
  -6   5 -12   20.50   15.60
   6   5  12   32.20   11.70
  -6  -5 -12   10.60    9.30
  -6   5 -13  232.48   30.40
  -6  -5 -13  177.88   21.80
  -6   5 -14  282.67   34.60
  -6  -5 -14  230.98   25.50
  -6   5 -15  155.38   29.70
  -6  -5 -15  171.28   24.50
  -6   6  16    0.40   11.10
  -6   6  15  117.89   16.30
  -6  -6  15   95.49   16.20
  -6   6  14   13.20   10.40
  -6  -6  14   -6.50    9.60
  -6   6  13  259.57   19.60
  -6  -6  13  246.28   21.90
  -6   6  12   68.89   12.00
  -6  -6  12   75.99   13.30
  -6   6  11  517.95   28.00
  -6  -6  11  556.24   30.00
  -6  -6  11  573.44   25.60
  -6   6  10  478.65   25.70
  -6  -6  10  526.05   28.30
  -6  -6  10  543.25   24.30
  -6   6   9  600.24   28.10
  -6  -6   9  586.14   26.30
  -6  -6   9  593.94   30.10
  -6   6   8  312.07   18.20
  -6   6   8  299.27   31.30
  -6  -6   8  310.77   19.90
  -6  -6   8  300.17   16.80
  -6   6   7   14.20    6.80
  -6   6   7    0.20   11.20
  -6  -6   7    3.40    3.50
  -6  -6   7   -2.90    6.00
  -6  -6   7    2.30    4.80
  -6   6   6    9.10   11.80
  -6   6   6   23.70    6.80
  -6  -6   6   22.40    5.20
  -6  -6   6   36.20    8.60
  -6  -6   6   16.40    5.90
  -6   6   5  913.21   36.30
  -6   6   5  939.41   52.09
  -6  -6   5  897.51   35.60
  -6  -6   5  894.11   38.60
  -6  -6   5  889.21   37.00
  -6   6   4   21.90    6.00
  -6   6   4   23.30   12.80
  -6  -6   4   13.40    4.10
  -6  -6   4   19.20    5.80
  -6  -6   4   15.70    6.90
  -6   6   3  170.58   23.50
  -6   6   3  193.78   11.90
  -6  -6   3  166.18   10.30
  -6  -6   3  159.78   11.10
  -6  -6   3  135.59   13.10
  -6  -6   3  160.08   11.30
  -6   6   2   92.79   19.10
  -6   6   2  108.19    9.00
  -6  -6   2  103.29    8.10
  -6  -6   2   95.29    9.60
  -6  -6   2  100.79    9.10
  -6   6   1    9.40    4.50
  -6   6   1   -3.40    9.70
  -6  -6   1   12.40    5.00
  -6  -6   1   19.40    4.10
  -6  -6   1   12.40    4.70
   6   6   0  476.45   28.40
  -6   6   0  501.35   20.40
  -6   6   0  443.36   34.70
   6  -6   0  515.45   25.60
  -6  -6   0  524.95   22.50
  -6  -6   0  481.95   22.30
  -6  -6   0  497.45   22.40
  -6  -6   0  483.65   22.00
   6   6   1  134.29   16.80
  -6   6  -1  131.79    8.40
  -6   6  -1  132.19   20.50
   6  -6   1  140.29   13.20
  -6  -6  -1  126.69    9.90
  -6  -6  -1  127.79    9.40
  -6  -6  -1  137.99   10.50
  -6   6  -2    7.90    3.40
   6   6   2   -0.40    8.30
  -6   6  -2   10.30   11.00
  -6  -6  -2    1.30    4.60
   6  -6   2    3.20    5.70
  -6  -6  -2    2.00    4.50
  -6  -6  -2    0.00    3.00
  -6   6  -3  101.69   19.20
   6   6   3  135.09   16.50
  -6  -6  -3  123.99    9.70
  -6  -6  -3  123.79   10.00
   6  -6   3  153.58   13.30
  -6  -6  -3  147.79   10.80
   6   6   4   10.30    8.70
  -6   6  -4   17.50   11.10
   6  -6   4   10.30    6.30
  -6  -6  -4   20.00    5.00
  -6  -6  -4   13.20    5.60
   6   6   5  208.18   20.00
  -6   6  -5  196.18   24.30
   6  -6   5  179.48   13.90
  -6  -6  -5  198.68   12.90
  -6  -6  -5  190.88   12.80
   6   6   6   38.10   11.10
  -6   6  -6   24.90   12.30
   6  -6   6   40.00    7.70
  -6  -6  -6   28.60    7.00
  -6  -6  -6   30.10    6.30
  -6   6  -7   39.40   14.10
   6   6   7   25.30   10.90
  -6  -6  -7   43.20    7.90
   6  -6   7   41.30    8.40
  -6  -6  -7   45.40    7.80
  -6   6  -8  207.48   26.50
   6   6   8  206.38   21.00
   6  -6   8  204.38   15.60
  -6  -6  -8  207.18   14.60
  -6  -6  -8  210.38   15.70
   6   6   9    7.40   10.90
  -6   6  -9    6.10   12.60
  -6  -6  -9   20.70    7.60
   6   6  10  143.39   18.60
  -6   6 -10  118.89   22.40
  -6  -6 -10  131.49   15.20
  -6   6 -11  111.49   22.70
   6   6  11  120.19   17.50
  -6  -6 -11   87.59   13.80
  -6   6 -12   18.20   17.40
   6   6  12   41.60   14.40
  -6  -6 -12   34.20   12.00
  -6   6 -13   64.49   22.70
  -6  -6 -13   67.89   15.00
  -6   6 -14   18.80   19.60
  -6  -6 -14   25.90   13.60
  -6  -6 -15   37.40   16.70
  -6   7  15  168.48   18.80
  -6  -7  15  192.28   22.20
  -6   7  14   -4.90    9.70
  -6  -7  14    9.10   11.60
  -6   7  13  655.83   32.90
  -6  -7  13  559.74   33.90
  -6   7  12   98.29   14.30
  -6  -7  12  104.59   15.80
  -6   7  11   13.20    9.30
  -6  -7  11   13.60   10.20
  -6  -7  11   18.80    8.10
  -6   7  10    3.10    8.30
  -6  -7  10    8.70    7.10
  -6  -7  10   -3.60    8.20
  -6   7   9  767.62   35.40
  -6  -7   9  837.62   33.90
  -6  -7   9  755.82   37.80
  -6   7   8    3.90    7.30
  -6  -7   8    5.50    7.70
  -6  -7   8   -1.10    5.70
  -6   7   7  518.95   25.20
  -6   7   7  538.85   39.50
  -6  -7   7  497.55   23.40
  -6  -7   7  418.86   26.10
  -6   7   6   26.90   15.40
  -6   7   6   19.00    7.10
  -6  -7   6   31.10    5.70
  -6  -7   6   37.00    7.40
  -6  -7   6   26.60    8.80
  -6   7   5   68.19   18.10
  -6   7   5   94.59   10.40
  -6  -7   5   67.49    8.90
  -6  -7   5   75.29   11.50
  -6  -7   5   69.89    7.90
  -6   7   4  523.45   24.00
  -6   7   4  503.05   39.10
  -6  -7   4  530.95   23.80
  -6  -7   4  476.75   23.30
  -6  -7   4  522.65   26.90
  -6   7   3   93.49   20.80
  -6   7   3  122.49   10.90
  -6  -7   3  125.49    9.40
  -6  -7   3  109.39   10.80
  -6  -7   3  120.19   10.70
  -6  -7   3   97.19   12.10
  -6   7   2    5.30   12.50
   6   7  -2    9.10    9.90
  -6   7   2    7.80    5.50
  -6  -7   2   -0.40    4.30
  -6  -7   2    2.70    3.20
  -6  -7   2    6.20    4.90
  -6   7   1  579.44   42.30
   6   7  -1  537.25   33.00
  -6   7   1  574.94   24.40
  -6  -7   1  567.24   25.30
  -6  -7   1  569.14   25.10
  -6  -7   1  555.94   25.10
  -6  -7   1  555.54   25.60
  -6   7   0   65.79    7.70
   6   7   0   49.50   13.30
  -6   7   0   92.79   20.30
   6  -7   0   75.79   12.00
  -6  -7   0   53.29    8.20
  -6  -7   0   54.99    7.30
  -6  -7   0   63.99    7.70
  -6   7  -1   17.10   13.60
   6   7   1    0.20    9.40
  -6   7  -1    8.90    5.00
  -6  -7  -1   11.20    5.70
   6  -7   1    7.20    7.50
  -6  -7  -1    3.60    3.80
  -6   7  -2   17.60   14.20
   6   7   2   19.00   10.40
  -6   7  -2    1.80    4.30
   6  -7   2   11.50    7.80
  -6  -7  -2    4.70    5.60
  -6  -7  -2   18.40    4.80
  -6   7  -3   94.69   20.30
   6   7   3  118.79   17.00
   6  -7   3  119.59   13.50
  -6  -7  -3  116.39   10.70
  -6  -7  -3  108.69   11.00
   6   7   4  306.87   24.50
  -6   7  -4  341.57   35.10
  -6  -7  -4  354.06   18.20
   6  -7   4  342.17   20.50
  -6  -7  -4  316.67   17.90
   6   7   5   61.99   14.30
  -6   7  -5  100.39   21.40
  -6  -7  -5   78.49    9.40
  -6  -7  -5   69.09    9.60
   6  -7   5   72.49   11.60
  -6   7  -6   38.30   15.70
   6   7   6   26.00   11.70
  -6  -7  -6   20.30    6.20
  -6  -7  -6   42.90    8.00
   6  -7   6   20.30    8.30
   6   7   7   -4.80   10.40
  -6   7  -7   12.70   14.00
  -6  -7  -7   23.90    7.00
   6  -7   7    6.40    7.20
  -6  -7  -7   23.00    8.10
  -6   7  -8   27.40   16.30
   6   7   8   11.10   11.50
   6  -7   8   24.00    8.60
  -6  -7  -8   21.30    7.30
   6   7   9  241.68   23.60
  -6   7  -9  251.17   32.10
  -6  -7  -9  252.47   19.10
   6   7  10   11.70   13.10
  -6   7 -10   -4.90   14.60
  -6  -7 -10    2.90    7.10
   6   7  11   11.20   13.10
  -6   7 -11   11.10   17.00
  -6  -7 -11   26.20   10.70
  -6   7 -12  137.49   27.70
   6   7  12  155.28   21.70
  -6  -7 -12  122.59   18.40
   6   7  13   94.99   18.90
  -6   7 -13  109.39   27.80
  -6  -7 -13  104.49   19.00
  -6   7 -14    6.80   22.00
  -6  -7 -14   24.50   15.40
  -6   8  14   12.80   12.40
  -6   8  13  323.17   22.90
  -6  -8  13  278.37   26.20
  -6   8  12   24.80   11.80
  -6  -8  12   48.50   13.60
  -6   8  11  291.87   21.40
  -6  -8  11  259.87   24.20
  -6  -8  11  323.87   19.80
  -6   8  10   51.89   11.70
  -6  -8  10   28.90    9.40
  -6  -8  10   23.50   11.00
  -6   8   9   69.29   12.20
  -6  -8   9   43.60   12.00
  -6  -8   9   77.09   11.20
  -6   8   8  243.68   18.20
  -6  -8   8  238.38   16.70
  -6  -8   8  222.38   20.70
  -6   8   7  186.68   16.40
  -6  -8   7  233.48   20.30
  -6  -8   7  188.98   14.30
  -6   8   6   26.70    8.30
  -6  -8   6   28.60    7.60
  -6  -8   6   20.30    9.50
   6   8  -5 1033.40   53.39
  -6   8   5 1040.70   43.50
  -6   8   5 1091.19   63.39
  -6  -8   5 1082.09   42.80
  -6  -8   5 1088.69   47.30
   6   8  -4   -4.80   11.40
  -6   8   4   -7.00    6.20
  -6   8   4   15.30   15.10
  -6  -8   4   -9.70    4.80
  -6  -8   4    1.30    3.90
  -6  -8   4    5.30    7.70
  -6  -8   4   -1.80    5.50
  -6   8   3   46.50   18.00
  -6   8   3   67.39    9.40
   6   8  -3   55.19   15.50
  -6  -8   3   65.19    8.30
  -6  -8   3   50.49    8.60
  -6  -8   3   73.89    8.60
  -6  -8   3   54.99    7.40
   6   8  -2    3.20   11.10
  -6   8   2    9.10    6.40
  -6   8   2    6.90   14.70
  -6  -8   2    1.80    5.20
  -6  -8   2   -3.20    3.30
  -6  -8   2   -2.20    3.90
  -6   8   1  203.38   30.60
   6   8  -1  205.68   24.10
  -6   8   1  223.58   14.60
  -6  -8   1  252.87   15.00
  -6  -8   1  229.98   15.00
  -6   8   0  548.85   44.90
  -6   8   0  592.44   25.60
   6   8   0  574.84   35.00
  -6  -8   0  606.54   27.00
  -6  -8   0  584.74   27.40
  -6   8  -1  297.17   36.50
  -6   8  -1  321.97   16.40
   6   8   1  266.17   26.30
  -6  -8  -1  270.57   17.00
   6  -8   1  340.07   22.80
  -6  -8  -1  327.57   17.80
  -6   8  -2   11.70   15.10
   6   8   2   16.10   11.60
  -6  -8  -2   28.30    6.30
   6  -8   2   31.70   10.20
  -6  -8  -2   27.20    7.60
   6   8   3   81.09   16.60
  -6   8  -3   28.90   18.10
  -6  -8  -3   66.49    9.00
  -6  -8  -3   84.49   10.40
   6  -8   3   87.69   13.30
   6   8   4   15.50   12.60
  -6   8  -4   10.90   15.30
  -6  -8  -4   10.50    5.70
   6  -8   4   21.80    9.00
  -6  -8  -4   19.40    7.10
  -6   8  -5  403.66   41.60
   6   8   5  412.26   29.10
  -6  -8  -5  362.66   21.10
  -6  -8  -5  407.06   21.10
   6  -8   5  358.56   23.40
   6   8   6  -25.60    9.90
  -6   8  -6    0.80   14.70
   6  -8   6   -5.60    7.90
  -6  -8  -6   -0.50    5.40
  -6  -8  -6   -0.40    6.60
   6   8   7   62.69   15.60
  -6   8  -7   68.59   21.10
  -6  -8  -7   70.89   10.80
  -6  -8  -7   57.09   10.20
   6  -8   7   61.19   12.50
  -6   8  -8  193.38   31.00
   6   8   8  278.17   26.80
  -6  -8  -8  239.28   18.60
   6  -8   8  283.97   20.40
   6   8   9   30.20   14.50
  -6   8  -9   16.40   18.00
  -6  -8  -9   23.50    9.30
   6   8  10    7.50   13.30
  -6   8 -10   -5.00   17.60
  -6  -8 -10   -3.90    7.70
  -6   8 -11  190.18   32.70
   6   8  11  194.38   23.80
  -6  -8 -11  162.68   19.60
  -6   8 -12   -5.10   20.40
   6   8  12   25.60   15.80
  -6  -8 -12    4.80   11.20
   6   8  13  212.88   25.20
  -6   8 -13  235.18   38.10
   6   9 -12   36.70   21.00
  -6   9  12   97.09   15.90
  -6  -9  12   44.30   15.80
   6   9 -11    9.60   17.70
  -6   9  11    2.70   10.10
  -6  -9  11    2.60   12.30
  -6  -9  11    2.70    9.20
   6   9 -10   26.50   18.20
  -6   9  10   13.10   10.50
  -6  -9  10   22.10   11.70
  -6  -9  10   14.80    9.30
   6   9  -9  496.25   38.20
  -6   9   9  418.36   26.20
  -6  -9   9  538.75   31.80
  -6  -9   9  517.45   26.70
  -6   9   8   58.29   12.10
   6   9  -8   54.39   18.80
  -6  -9   8   49.60   10.40
  -6  -9   8   79.79   14.60
  -6   9   7   46.40   11.20
   6   9  -7   71.29   19.90
  -6  -9   7   75.99   14.30
  -6  -9   7   45.30    9.90
  -6   9   6   74.19   12.00
   6   9  -6   60.69   17.10
  -6  -9   6   78.29   13.90
  -6  -9   6   79.29   11.60
   6   9  -5   76.09   18.50
  -6   9   5   48.60   10.40
  -6  -9   5   50.69   12.60
  -6  -9   5   50.99    9.70
   6   9  -4  243.48   27.90
  -6   9   4  254.47   17.20
  -6  -9   4  244.78   16.60
  -6   9   3  459.25   46.40
  -6   9   3  468.25   23.50
   6   9  -3  448.76   32.80
  -6  -9   3  439.06   23.30
  -6   9   2  150.78   29.00
  -6   9   2  156.98   13.80
   6   9  -2   95.09   20.00
  -6  -9   2  105.59   12.10
   6   9  -1  438.06   31.80
  -6   9   1  421.56   45.50
  -6   9   1  473.75   23.00
  -6  -9   1  444.56   23.20
   6   9   0   83.39   18.00
  -6   9   0   71.79   23.70
  -6   9   0   74.19   10.10
  -6  -9   0   68.69   10.20
  -6  -9   0   80.49    9.80
  -6   9  -1  275.77   38.00
  -6   9  -1  313.67   17.10
   6   9   1  344.87   30.90
  -6  -9  -1  293.77   18.00
  -6  -9  -1  273.17   17.60
   6   9   2    9.70   12.30
  -6   9  -2   -3.20   16.20
  -6  -9  -2    5.30    5.30
   6  -9   2   29.90   11.10
  -6  -9  -2    8.30    6.80
   6   9   3  496.65   33.80
  -6   9  -3  448.36   47.50
  -6  -9  -3  494.75   24.70
  -6  -9  -3  482.65   25.40
   6  -9   3  501.65   29.90
   6   9   4  419.86   30.70
  -6   9  -4  311.07   40.70
  -6  -9  -4  369.66   20.70
   6  -9   4  387.36   25.70
  -6  -9  -4  356.56   21.40
  -6   9  -5  113.29   27.50
   6   9   5  151.38   21.20
  -6  -9  -5  103.79   12.90
   6  -9   5  138.99   17.60
  -6  -9  -5  133.39   13.70
  -6   9  -6   31.70   19.40
   6   9   6   19.30   13.40
  -6  -9  -6    7.50    6.90
  -6  -9  -6    6.20    7.70
   6  -9   6   -7.50    9.00
   6   9   7   10.50   13.10
  -6   9  -7   10.00   19.10
  -6  -9  -7   14.20    7.60
   6  -9   7   -2.90    9.00
  -6   9  -8    0.30   17.20
   6   9   8   -4.60   13.30
   6  -9   8   21.80   11.20
  -6  -9  -8    6.20    7.90
  -6   9  -9  451.25   50.49
   6   9   9  512.65   34.90
  -6  -9  -9  450.95   28.90
   6   9  10    5.30   14.90
  -6   9 -10  -13.10   20.50
  -6   9 -11   83.89   28.60
   6   9  11   80.59   19.30
  -6  10  11   37.40   13.30
  -6 -10  11   54.59   13.10
   6  10 -10   -9.90   18.40
  -6  10  10   16.80   11.70
  -6 -10  10   10.80   14.10
  -6 -10  10   -2.00    9.70
  -6  10   9   18.10   11.20
   6  10  -9   24.40   20.00
  -6 -10   9   10.30   10.10
  -6 -10   9   32.30   13.80
   6  10  -8   83.89   22.00
  -6  10   8   82.69   14.00
  -6 -10   8   64.29   15.60
  -6 -10   8   29.20   10.90
  -6  10   7  136.89   15.90
   6  10  -7  142.79   24.60
  -6 -10   7  142.19   18.70
  -6 -10   7  123.99   15.30
   6  10  -6  148.89   24.30
  -6  10   6   88.69   13.40
  -6 -10   6  104.79   17.40
  -6 -10   6   96.39   13.20
  -6  10   5  298.37   19.80
   6  10  -5  242.78   30.10
  -6 -10   5  268.87   18.60
  -6  10   4   65.39   11.60
   6  10  -4   38.50   18.40
  -6 -10   4   42.00    9.80
  -6  10   3  144.19   14.10
   6  10  -3  110.09   21.20
  -6 -10   3  102.19   13.00
  -6  10   2    7.40    8.20
   6  10  -2   25.50   15.10
  -6 -10   2    0.70    6.50
  -6  10   1  227.68   16.50
   6  10  -1  225.78   27.50
  -6 -10   1  242.78   17.10
  -6  10   0   25.20   20.60
   6  10   0   21.20   15.40
  -6 -10   0   24.50    8.50
  -6  10  -1  385.66   46.10
   6  10   1  410.16   35.50
  -6 -10  -1  438.96   23.50
  -6  10  -2   49.40   25.00
   6  10   2   60.59   18.30
   6 -10   2   -1.80   10.00
  -6 -10  -2   47.10   10.10
  -6  10  -3   81.89   28.10
   6  10   3  160.58   23.70
  -6 -10  -3  133.29   14.50
   6 -10   3  140.79   19.40
   6  10   4   -8.70   14.00
  -6  10  -4    2.00   21.20
  -6 -10  -4   -4.00    7.50
   6 -10   4  -12.60    9.40
  -6  10  -5  628.14   59.89
   6  10   5  561.24   37.90
   6 -10   5  506.35   33.00
  -6 -10  -5  567.44   28.40
   6  10   6    3.60   15.10
  -6  10  -6   33.20   25.00
  -6 -10  -6   33.20   10.30
   6 -10   6   27.20   13.20
  -6  10  -7  434.36   51.79
   6  10   7  401.06   32.50
   6 -10   7  421.26   29.50
  -6  10  -8   13.80   25.10
   6  10   8   28.60   17.00
   6 -10   8   41.00   13.90
   6  10   9   41.00   18.50
  -6  10  -9   53.09   26.90
  -6  10 -10   -9.10   24.90
  -6  11   9  168.48   18.70
  -6  11   8   50.19   13.40
  -6 -11   8   69.79   13.60
  -6 -11   8   60.99   16.60
   6  11  -7    8.10   17.70
  -6  11   7    0.30   10.70
  -6 -11   7    9.00   12.60
  -6 -11   7    4.70    8.90
  -6  11   6   38.80   11.60
   6  11  -6   54.09   19.70
  -6 -11   6   33.20   10.70
   6  11  -5   76.49   20.80
  -6  11   5   49.50   11.70
  -6 -11   5   37.40   10.40
   6  11  -4   -6.20   15.30
  -6  11   4    9.50    9.80
  -6 -11   4   16.20    9.30
   6  11  -3  234.18   29.50
  -6  11   3  283.27   19.20
  -6 -11   3  230.78   18.10
   6  11  -2  119.89   23.40
  -6 -11   2  137.29   15.40
   6  11  -1  257.87   30.00
  -6 -11   1  225.58   19.40
   6  11   0    4.20   16.10
  -6 -11   0    4.60    7.90
   6  11   1  270.77   30.60
  -6 -11  -1  268.77   19.10
   6  11   2  222.78   28.10
  -6 -11  -2  217.18   19.30
   6  11   3  321.67   32.80
  -6 -11  -3  337.27   21.70
   6  11   4   81.59   20.80
  -6 -11  -4   64.69   12.00
   6 -11   4   68.09   16.80
   6  11   5  103.79   21.50
   6 -11   5  132.19   20.50
  -6 -11  -5  127.59   15.50
   6  11   6   58.49   18.50
   6 -11   6   19.40   14.40
   6  11   7    0.30   17.00
   6 -11   7    4.20   13.20
   6 -11   8   70.49   17.50
   6  12  -2  120.59   24.70
  -6 -12   2  115.79   15.20
   6  12  -1  175.18   27.40
  -6 -12   1  150.68   17.30
   6  12   0  129.69   25.00
  -6 -12   0  133.09   16.30
   6  12   1  115.29   24.00
  -6 -12  -1   89.39   14.20
   6  12   2  123.49   24.10
  -6 -12  -2  110.69   15.10
  -6 -12  -3    3.20   10.00
  -6 -12  -4   47.80   12.40
  -7   0  18   88.59   15.40
  -7   0  17   -8.30    9.30
  -7   0  16  305.67   21.40
  -7   0  15    9.70    8.50
  -7   0  14  402.76   23.00
  -7   0  13   -1.60    6.50
  -7   0  12  890.11   37.70
  -7   0  11    1.70    4.80
  -7   0  11   -2.20    5.30
  -7   0  10   31.70    7.10
  -7   0  10   29.90    6.70
  -7   0   9    1.60    4.50
  -7   0   9   -1.00    4.30
  -7   0   9    8.00    4.80
  -7   0   8 1279.17   47.10
  -7   0   8 1204.28   51.59
  -7   0   8 1320.07   45.70
  -7   0   7    5.50    4.00
  -7   0   7    7.20    3.90
  -7   0   7    1.50    4.30
  -7   0   6    0.70    4.40
  -7   0   6   10.20    3.70
  -7   0   6   10.30    4.60
  -7   0   6    7.60    4.20
  -7   0   5    1.50    3.70
  -7   0   5   -1.60    3.80
  -7   0   5    0.30    2.70
  -7   0   5   -1.40    3.30
  -7   0   5    1.90    4.20
  -7   0   4    6.00    4.00
  -7   0   4    6.60    4.00
  -7   0   4    6.70    2.50
  -7   0   4   16.30    4.80
  -7   0   4   14.30    4.20
  -7   0   3   -5.10    3.10
  -7   0   3   -8.10    2.40
  -7   0   3   -5.80    3.20
  -7   0   3    2.10    4.20
  -7   0   2   18.30    3.80
  -7   0   2   32.60    5.90
  -7   0   2   27.80    4.90
  -7   0   2   24.70    5.30
  -7   0   1    2.70    2.50
  -7   0   1    6.60    3.00
  -7   0   1   -3.60    3.90
  -7   0   1    1.20    4.10
  -7   0   0  137.99    7.60
  -7   0   0  154.68    8.60
  -7   0   0  159.98   11.10
  -7   0   0  144.39   10.50
  -7   0  -1    7.80    4.90
  -7   0  -1   -0.40    4.50
  -7   0  -2 2206.08   84.39
  -7   0  -2 2203.88   77.79
  -7   0  -3   -7.70    5.00
  -7   0  -3    0.40    5.60
  -7   0  -4   40.00    3.40
  -7   0  -4   50.99    8.80
  -7   0  -4   46.10    3.70
  -7   0  -4   37.70    8.40
  -7   0  -5    0.40    6.30
  -7   0  -5    3.30    2.50
  -7   0  -5    2.60    2.60
  -7   0  -6  509.35   21.70
  -7   0  -6  471.75   21.30
  -7   0  -7   -4.80    3.50
  -7   0  -7    2.40    3.90
  -7   0  -8  794.72   36.40
  -7   0  -8  889.41   37.00
  -7   0  -9    6.10    5.50
  -7   0 -10 1063.79   48.00
  -7   0 -11    5.70    7.80
  -7   0 -12  163.08   19.00
  -7   0 -13   -2.30    9.60
  -7   0 -14  371.26   30.30
  -7   0 -15    2.70   13.20
  -7   0 -16   97.39   21.40
  -7   1  18  108.89   16.60
  -7  -1  18   89.89   15.10
  -7   1  17   45.60   12.40
  -7  -1  17   38.00   11.80
  -7   1  16  631.94   31.90
  -7  -1  16  581.34   31.70
  -7   1  15   99.29   13.10
  -7  -1  15   68.89   11.60
  -7   1  14   43.80    9.70
  -7  -1  14   25.60    9.10
  -7   1  13    3.50    6.90
  -7  -1  13   12.00    7.40
  -7   1  12  832.72   36.00
  -7  -1  12  858.71   36.50
  -7   1  11  194.98   15.60
  -7   1  11  189.88   13.30
  -7  -1  11  172.28   13.30
  -7  -1  11  174.28   13.50
  -7   1  10  128.19   11.10
  -7   1  10  138.19   14.20
  -7  -1  10  133.79   11.30
  -7  -1  10  125.59   11.40
  -7   1   9  337.67   20.90
  -7   1   9  354.66   17.50
  -7  -1   9  376.76   16.40
  -7  -1   9  349.77   17.90
  -7  -1   9  372.06   19.40
  -7   1   8  374.66   17.10
  -7   1   8  372.06   18.60
  -7   1   8  316.07   20.20
  -7  -1   8  332.07   18.30
  -7  -1   8  348.87   15.90
  -7  -1   8  372.46   17.50
  -7   1   7   70.49    6.80
  -7   1   7   66.39    9.10
  -7   1   7   59.19    7.50
  -7  -1   7   51.29    6.80
  -7  -1   7   51.39    6.40
  -7  -1   7   65.59    7.00
  -7   1   6  266.57   14.50
  -7   1   6  268.77   14.40
  -7   1   6  268.47   12.60
  -7   1   6  257.77   16.60
  -7   1   6  278.87   16.00
  -7  -1   6  260.27   14.40
  -7  -1   6  277.37   13.30
  -7  -1   6  269.17   13.20
  -7   1   5  189.98   11.80
  -7   1   5  208.18   14.30
  -7   1   5  220.68   13.30
  -7   1   5  211.38   12.80
  -7   1   5  198.08    9.90
  -7  -1   5  199.58   11.80
  -7  -1   5  207.28   11.50
  -7  -1   5  232.88   15.80
  -7  -1   5  239.78   12.90
  -7  -1   5  211.88   10.70
  -7   1   4 2337.57   81.29
  -7   1   4 2155.78   82.69
  -7   1   4 2129.59   73.59
  -7   1   4 2069.69   81.09
  -7   1   4 2138.09   75.49
  -7  -1   4 2118.79   74.29
  -7  -1   4 2139.59   74.29
  -7  -1   4 2380.66   84.19
  -7  -1   4 2112.79   80.99
  -7  -1   4 2120.09   79.99
  -7   1   3   83.59    9.10
  -7   1   3   89.19    8.40
  -7   1   3   76.49    8.80
  -7   1   3   77.99    7.10
  -7  -1   3   68.19    7.30
  -7  -1   3   76.09    7.50
  -7  -1   3   68.69    4.50
  -7  -1   3   81.99    9.30
  -7  -1   3   73.09    6.10
  -7   1   2  686.23   28.60
  -7   1   2  692.93   30.10
  -7   1   2  675.03   29.80
  -7   1   2  707.73   28.10
  -7  -1   2  698.03   29.30
  -7  -1   2  694.33   27.20
  -7  -1   2  666.63   27.10
  -7  -1   2  765.22   31.30
  -7   1   1  304.77   13.40
  -7   1   1  278.97   15.70
  -7   1   1  284.37   15.70
  -7   1   1  310.97   16.20
  -7  -1   1  315.77   15.90
  -7  -1   1  280.57   12.50
  -7  -1   1  319.87   16.60
  -7  -1   1  270.47   14.20
  -7   1   0  214.98   13.50
  -7   1   0  211.48   13.60
  -7   1   0  212.18   12.40
  -7   1   0  219.08    9.60
  -7  -1   0  197.78    8.90
  -7  -1   0  201.28   12.90
  -7  -1   0  219.18   13.10
  -7  -1   0  202.78   11.90
  -7   1  -1   18.90    6.10
  -7   1  -1   11.10    5.90
  -7  -1  -1   10.80    1.60
  -7  -1  -1   13.80    5.00
  -7  -1  -1   16.10    5.10
  -7  -1  -1   21.10    5.70
  -7   1  -2   25.60    6.80
  -7  -1  -2   24.30    5.10
  -7  -1  -2   20.50    1.90
  -7  -1  -2   21.60    6.20
  -7  -1  -2   29.40    6.20
  -7   1  -3   81.29   10.40
  -7  -1  -3   78.79    8.90
  -7  -1  -3   92.19    7.80
  -7  -1  -3   85.79    9.90
  -7  -1  -3   71.09    4.30
  -7   1  -4   24.10    2.30
  -7   1  -4   19.80    7.70
   7   1   4   27.20    4.50
  -7   1  -4   23.90    3.70
  -7  -1  -4   24.10    5.10
  -7  -1  -4   18.70    7.00
  -7  -1  -4   20.70    2.80
  -7  -1  -4   16.10    6.00
  -7   1  -5  201.18    9.30
   7   1   5  189.28   11.60
  -7   1  -5  172.18   11.10
  -7  -1  -5  203.38   16.10
  -7  -1  -5  203.78   10.10
  -7  -1  -5  239.18   13.40
  -7  -1  -5  220.38   14.20
  -7   1  -6 2104.49   73.89
  -7   1  -6 2001.30   76.09
  -7  -1  -6 1933.01   74.49
  -7  -1  -6 1967.40   73.19
  -7  -1  -6 2065.59   77.39
  -7   1  -7    6.60    3.60
  -7   1  -7    5.30    4.90
  -7  -1  -7    9.40    4.10
  -7  -1  -7    3.40    7.20
  -7  -1  -7   17.50    6.40
  -7   1  -8    8.70    5.80
  -7  -1  -8    8.90    5.10
  -7   1  -9    6.30    6.30
  -7  -1  -9    7.10    5.60
  -7   1 -10  400.36   25.80
  -7  -1 -10  443.16   24.90
  -7   1 -11   35.30   10.50
  -7  -1 -11   48.90   10.40
  -7   1 -12  356.16   27.20
  -7  -1 -12  379.96   26.20
  -7   1 -13   16.20   11.40
  -7  -1 -13   34.30   11.40
  -7   1 -14  224.38   26.90
  -7  -1 -14  296.87   28.10
  -7   1 -15    1.10   13.20
  -7  -1 -15   15.40   13.80
  -7   1 -16  158.68   25.70
  -7  -1 -16  106.49   21.90
  -7   2  17   -2.10    9.70
  -7  -2  17    7.90   10.30
  -7   2  16  228.88   19.60
  -7  -2  16  183.78   18.60
  -7   2  15   73.39   12.00
  -7  -2  15   71.59   12.50
  -7   2  14   89.49   12.00
  -7  -2  14   86.99   12.30
  -7   2  13  223.18   15.70
  -7  -2  13  172.98   16.00
  -7   2  12  287.17   17.40
  -7  -2  12  278.47   17.90
  -7   2  11   73.79    9.20
  -7   2  11   63.19   11.40
  -7   2  11   69.59    9.30
  -7  -2  11   37.30    8.00
  -7   2  10   55.39    7.90
  -7   2  10   41.00    9.50
  -7   2  10   55.29    8.20
  -7  -2  10   51.89    8.20
  -7  -2  10   62.79    7.20
  -7  -2  10   56.49    7.60
  -7   2   9   12.10    6.60
  -7   2   9   25.80    6.30
  -7   2   9   19.80    6.10
  -7  -2   9   19.10    5.20
  -7  -2   9   17.80    4.80
  -7  -2   9   16.70    5.70
  -7   2   8 1744.63   62.39
  -7   2   8 1657.33   71.19
  -7   2   8 1719.43   66.39
  -7  -2   8 1741.53   66.79
  -7  -2   8 1776.02   63.59
  -7  -2   8 1738.73   60.39
  -7   2   7  190.08   11.60
  -7   2   7  199.78   10.80
  -7   2   7  193.78   16.10
  -7  -2   7  178.58   10.60
  -7  -2   7  162.18   11.20
  -7  -2   7  169.68   11.40
  -7   2   6   31.50    4.70
  -7   2   6   25.40    7.30
  -7   2   6   39.50    5.90
  -7  -2   6   33.30    5.10
  -7  -2   6   37.30    5.60
  -7  -2   6   32.30    5.50
  -7   2   5  255.77   11.90
  -7   2   5  240.78   17.80
  -7   2   5  267.17   14.50
  -7   2   5  259.67   14.40
  -7  -2   5  278.27   13.20
  -7  -2   5  258.57   13.50
  -7  -2   5  276.87   14.90
  -7  -2   5  266.07   13.30
  -7  -2   5  329.77   19.80
  -7   2   4  160.28    8.10
  -7   2   4  154.98   14.80
  -7   2   4  174.48   11.60
  -7   2   4  191.98   10.90
  -7  -2   4  197.58   15.60
  -7  -2   4  173.88   11.00
  -7  -2   4  170.18   10.30
  -7  -2   4  174.18    9.80
  -7  -2   4  176.58    9.50
  -7   2   3    8.00    6.10
  -7   2   3    7.20    5.00
  -7   2   3    7.30    2.00
  -7   2   3    5.40    3.10
  -7  -2   3    6.60    2.60
  -7  -2   3   12.90    4.40
  -7  -2   3    7.00    2.90
  -7  -2   3    5.20    3.80
  -7  -2   3    9.20    5.30
  -7   2   2 1626.54   57.79
  -7   2   2 1534.85   60.09
  -7   2   2 1600.74   63.19
  -7  -2   2 1709.33   63.89
  -7  -2   2 1447.76   56.99
  -7  -2   2 1536.95   54.89
  -7  -2   2 1470.95   59.29
  -7   2   1   98.29   10.20
  -7   2   1  128.59   12.70
  -7   2   1  123.79    7.20
  -7  -2   1  136.59    9.10
  -7  -2   1  119.89    9.30
  -7  -2   1  121.59    6.60
  -7  -2   1  135.99   13.20
  -7   2   0 1658.03   67.49
  -7   2   0 1689.83   68.39
  -7   2   0 1778.12   63.19
   7  -2   0 1713.93   60.09
  -7  -2   0 1839.82   69.69
  -7  -2   0 1744.63   61.29
  -7  -2   0 1709.43   62.99
  -7  -2   0 1822.82   67.29
  -7   2  -1  113.49   10.50
  -7   2  -1  112.69   11.30
  -7   2  -1  108.09    5.80
  -7  -2  -1  109.79    5.80
  -7  -2  -1  122.79    9.80
   7  -2   1   98.69    5.30
  -7  -2  -1  109.79   11.90
  -7  -2  -1   91.59    8.90
  -7   2  -2 1569.74   56.49
  -7   2  -2 1591.24   60.39
  -7  -2  -2 1552.54   61.39
  -7  -2  -2 1580.84   56.69
  -7  -2  -2 1571.54   56.09
  -7  -2  -2 1639.44   63.79
   7  -2   2 1494.95   52.89
  -7   2  -3   18.80    5.00
  -7   2  -3   21.30    7.70
  -7   2  -3   22.90    2.50
  -7  -2  -3   18.70    2.80
  -7  -2  -3   32.50    7.80
  -7  -2  -3   19.20    6.20
  -7  -2  -3   23.00    5.70
   7  -2   3   17.40    2.20
   7   2   4  141.69   11.00
  -7   2  -4  122.79   10.40
  -7   2  -4  134.99    6.80
   7  -2   4  132.49    6.50
  -7  -2  -4  138.79    7.60
  -7  -2  -4  173.78   15.00
  -7  -2  -4  148.99   10.90
  -7  -2  -4  145.09   13.00
  -7   2  -5  168.98    8.40
  -7   2  -5  168.58   12.30
   7   2   5  157.78   11.80
  -7  -2  -5  169.98   12.60
  -7  -2  -5  170.48    9.40
  -7  -2  -5  153.48   14.60
  -7  -2  -5  195.28   16.40
   7   2   6   -0.90    5.10
  -7   2  -6    2.90    2.50
  -7   2  -6    3.30    4.80
  -7  -2  -6   -1.80    5.70
  -7  -2  -6    2.00    3.10
  -7  -2  -6    9.90    6.80
  -7   2  -7  230.78   16.80
  -7   2  -7  264.07   12.80
  -7  -2  -7  240.18   16.20
  -7  -2  -7  211.28   13.50
  -7  -2  -7  264.37   20.20
  -7   2  -8    8.80    6.40
  -7  -2  -8   22.50    8.90
  -7  -2  -8    6.60    4.70
  -7   2  -9  169.68   17.40
  -7  -2  -9  189.98   14.40
  -7   2 -10 1122.49   51.29
  -7  -2 -10 1012.40   46.80
  -7   2 -11   -3.80    8.60
  -7  -2 -11    3.20    7.70
  -7   2 -12   13.40   10.90
  -7  -2 -12   10.50    9.00
  -7   2 -13  145.39   20.90
  -7  -2 -13  120.49   17.50
  -7   2 -14  268.87   29.00
  -7  -2 -14  208.98   24.00
  -7   2 -15  210.18   27.80
  -7  -2 -15  162.88   23.40
  -7   2 -16   35.60   18.60
  -7  -2 -16   48.90   17.80
  -7   3  17  140.09   17.10
  -7  -3  17  172.68   19.70
  -7   3  16   61.89   12.70
  -7  -3  16   83.19   13.80
  -7   3  15   69.79   12.20
  -7  -3  15   53.69   11.60
  -7   3  14   -0.30    7.80
  -7  -3  14    6.80    7.80
  -7   3  13    3.20    7.30
  -7  -3  13   -1.30    7.40
  -7   3  12 1049.09   43.10
  -7   3  12 1001.80   42.20
  -7  -3  12 1016.50   43.60
  -7   3  11  118.39   11.80
  -7   3  11  127.09   11.40
  -7  -3  11   90.19   11.40
  -7   3  10    8.10    5.80
  -7   3  10    9.20    8.10
  -7   3  10   14.50    5.90
  -7  -3  10    5.70    5.10
  -7  -3  10   11.00    4.50
  -7  -3  10   11.40    6.40
  -7   3   9  149.99   10.90
  -7   3   9  121.69   10.60
  -7   3   9  125.59   16.00
  -7  -3   9  134.19   10.30
  -7  -3   9  128.69   11.70
  -7  -3   9  120.99    9.60
  -7   3   8   78.39    8.50
  -7   3   8   90.19   14.10
  -7   3   8   69.99    7.90
  -7  -3   8   74.99    9.10
  -7  -3   8   91.39    8.30
  -7  -3   8   78.79    8.00
  -7   3   7   -3.70    6.20
  -7   3   7    3.80    4.30
  -7   3   7    7.80    4.90
  -7  -3   7   13.70    4.00
  -7  -3   7    5.30    4.30
  -7  -3   7   13.60    5.30
  -7   3   6  984.70   39.10
  -7   3   6  939.41   35.70
  -7   3   6  973.30   46.20
  -7  -3   6  954.80   35.90
  -7  -3   6  948.11   37.30
  -7  -3   6  971.90   38.50
  -7   3   5  139.49   16.00
  -7   3   5  123.59   10.30
  -7   3   5  131.39    7.90
  -7  -3   5  108.99    8.00
  -7  -3   5  120.89    8.90
  -7  -3   5  115.29    9.20
  -7   3   4 1379.46   51.59
  -7   3   4 1339.77   47.00
  -7   3   4 1405.06   59.59
  -7   3   4 1341.57   52.69
  -7  -3   4 1287.37   48.80
  -7  -3   4 1296.97   50.89
  -7  -3   4 1466.75   59.79
  -7  -3   4 1326.07   48.30
  -7  -3   4 1320.37   52.49
  -7   3   3   22.30    2.80
  -7   3   3   19.90    5.70
  -7   3   3   16.20    3.50
  -7   3   3   18.70    8.30
  -7  -3   3   10.70    6.60
  -7  -3   3   11.80    4.40
  -7  -3   3   12.60    3.10
  -7  -3   3   13.40    4.10
  -7  -3   3    6.30    4.30
  -7   3   2  870.81   33.00
  -7   3   2  780.52   40.40
  -7   3   2  836.22   35.40
  -7  -3   2  957.70   41.80
  -7  -3   2  839.62   32.30
  -7  -3   2  806.92   34.30
  -7  -3   2  823.22   32.50
  -7   3   1   80.09    6.30
  -7   3   1   63.49   11.30
  -7   3   1   92.59    9.80
  -7  -3   1   63.29    7.30
  -7  -3   1   81.89    5.60
  -7  -3   1   77.59    8.10
  -7  -3   1   64.49   11.20
  -7   3   0  816.62   35.30
  -7   3   0  789.32   38.60
  -7   3   0  801.72   31.00
   7  -3   0  773.02   30.70
  -7  -3   0  770.92   31.00
  -7  -3   0  892.71   40.00
  -7  -3   0  812.12   30.90
  -7  -3   0  818.82   33.90
  -7   3  -1   -1.10    5.90
  -7   3  -1   11.60    2.70
  -7   3  -1   12.40    6.80
  -7  -3  -1    9.80    5.10
  -7  -3  -1   15.20    7.80
  -7  -3  -1    8.90    4.50
  -7  -3  -1    7.50    2.20
   7  -3   1    5.90    3.20
  -7   3  -2  818.72   30.30
  -7   3  -2  733.13   36.40
  -7   3  -2  779.02   35.90
  -7   3  -2  842.82   30.10
  -7  -3  -2  753.12   30.80
  -7  -3  -2  772.32   30.20
  -7  -3  -2  790.02   33.90
   7  -3   2  774.52   28.90
  -7  -3  -2  803.22   39.60
  -7   3  -3  171.88    8.30
  -7   3  -3  146.29   14.20
   7   3   3  175.68   13.30
  -7  -3  -3  158.38   12.20
  -7  -3  -3  162.88    8.80
  -7  -3  -3  188.28   18.70
  -7  -3  -3  172.48   11.30
   7  -3   3  153.68    8.40
   7   3   4  108.39   11.30
  -7   3  -4  101.29    6.30
  -7   3  -4   95.99   11.30
  -7  -3  -4   90.89   10.40
   7  -3   4   93.89    6.60
  -7  -3  -4  104.59    9.90
  -7  -3  -4   99.09    7.00
  -7  -3  -4  109.09   15.10
   7   3   5  121.39   12.20
  -7   3  -5  100.29   12.30
  -7   3  -5  102.39    7.00
  -7  -3  -5  128.09   12.40
  -7  -3  -5  146.69   17.70
  -7  -3  -5  120.39   10.80
  -7  -3  -5  129.39    8.40
   7  -3   5  108.09    7.30
  -7   3  -6 2312.37   79.29
   7   3   6 2145.89   79.49
  -7   3  -6 2140.09   85.89
  -7  -3  -6 2130.59   76.69
  -7  -3  -6 2043.00   80.19
  -7   3  -7   14.60    7.40
   7   3   7    5.50    6.90
  -7  -3  -7   13.90    4.80
  -7  -3  -7    8.70    6.80
  -7   3  -8   83.29   13.50
  -7  -3  -8  119.09   12.80
  -7  -3  -8   78.79    9.50
  -7   3  -9  117.29   16.10
  -7  -3  -9  139.49   13.40
  -7  -3  -9  172.88   16.00
  -7   3 -10   24.00   11.00
  -7  -3 -10   15.90    7.30
  -7   3 -11  495.25   34.00
  -7  -3 -11  510.65   29.40
  -7   3 -12   11.80   10.90
  -7  -3 -12   -0.50    8.80
  -7   3 -13   89.19   19.00
  -7  -3 -13   84.09   15.60
  -7   3 -14  212.58   27.70
  -7  -3 -14  190.88   23.10
  -7   3 -15   32.90   18.90
  -7  -3 -15   22.00   14.20
  -7   3 -16    2.20   18.60
  -7  -3 -16   10.40   15.20
  -7   4  17   -0.60   11.40
  -7  -4  17   -6.20   10.00
  -7   4  16  229.68   20.10
  -7  -4  16  218.68   21.20
  -7   4  15  148.59   16.00
  -7  -4  15  158.48   17.50
  -7   4  14    5.80    8.60
  -7  -4  14   -6.30    7.80
  -7   4  13  292.27   19.60
  -7  -4  13  351.26   21.70
  -7   4  12    6.70    7.10
  -7  -4  12   -1.10    7.00
  -7   4  11    3.90    6.70
  -7  -4  11   14.20    7.50
  -7   4  10  306.77   25.40
  -7   4  10  305.87   17.50
  -7  -4  10  317.57   19.20
  -7  -4  10  299.87   16.00
  -7   4   9  265.57   15.40
  -7   4   9  282.47   23.50
  -7   4   9  272.17   15.30
  -7  -4   9  242.48   16.60
  -7  -4   9  260.67   15.30
  -7  -4   9  267.07   14.40
  -7   4   8 1049.59   43.50
  -7   4   8 1060.49   41.80
  -7   4   8 1043.30   53.09
  -7  -4   8 1130.09   43.90
  -7  -4   8 1107.09   44.20
  -7  -4   8 1120.79   40.80
  -7   4   7  305.77   15.50
  -7   4   7  326.57   25.00
  -7   4   7  295.67   16.50
  -7  -4   7  290.37   15.90
  -7  -4   7  329.37   15.60
  -7  -4   7  312.47   17.30
  -7   4   6  244.58   12.60
  -7   4   6  223.08   13.60
  -7   4   6  260.37   24.50
  -7  -4   6  209.48   13.70
  -7  -4   6  230.58   12.70
  -7  -4   6  203.38   12.60
  -7   4   5   47.70    7.00
  -7   4   5   47.20    6.00
  -7   4   5   35.10   11.20
  -7  -4   5   46.90    5.80
  -7  -4   5   42.40    6.90
  -7  -4   5   45.20    6.80
  -7   4   4  718.63   31.40
  -7   4   4  716.73   27.80
  -7   4   4  809.32   41.30
  -7  -4   4  764.42   31.80
  -7  -4   4  724.33   30.10
  -7  -4   4  743.93   30.20
  -7  -4   4  753.42   29.40
  -7   4   3  316.97   13.90
  -7   4   3  352.86   17.90
  -7   4   3  392.56   26.60
  -7  -4   3  363.56   17.00
  -7  -4   3  360.96   16.80
  -7  -4   3  331.97   17.10
  -7  -4   3  351.86   16.00
  -7   4   2 1173.18   56.79
  -7   4   2 1220.78   48.80
  -7   4   2 1258.97   46.60
  -7   4   2 1231.58   41.70
  -7  -4   2 1158.98   46.00
  -7  -4   2 1185.28   44.60
  -7  -4   2 1200.88   47.70
  -7  -4   2 1278.47   57.19
  -7   4   1   72.69    9.40
  -7   4   1   64.79   13.70
  -7   4   1   73.39    6.50
  -7  -4   1   73.49   13.00
  -7  -4   1   68.89    7.80
  -7  -4   1   54.99    7.30
  -7  -4   1   66.59    6.00
  -7   4   0  496.05   30.40
  -7   4   0  550.74   25.00
  -7   4   0  494.75   20.80
  -7  -4   0  461.25   20.30
  -7  -4   0  540.15   31.40
  -7  -4   0  479.85   22.70
  -7  -4   0  474.55   21.40
   7  -4   0  460.55   21.60
  -7   4  -1   13.90    8.90
  -7   4  -1   15.30    3.40
  -7   4  -1   18.00    7.90
  -7  -4  -1   17.30    3.30
  -7  -4  -1   11.00    8.80
  -7  -4  -1    8.60    5.20
  -7  -4  -1    4.60    4.50
   7  -4   1    8.00    4.30
  -7   4  -2 1740.93   75.99
  -7   4  -2 1874.21   66.59
   7   4   2 1809.42   69.29
  -7  -4  -2 1950.01   79.79
  -7  -4  -2 1816.72   69.59
  -7  -4  -2 1754.92   66.59
  -7  -4  -2 1764.82   66.89
   7  -4   2 1765.62   64.29
  -7  -4  -2 1822.92   64.29
  -7   4  -3  309.37   23.00
   7   4   3  339.47   20.80
  -7   4  -3  360.06   15.50
   7  -4   3  318.97   15.70
  -7  -4  -3  417.36   28.80
  -7  -4  -3  355.46   16.10
  -7  -4  -3  359.86   17.60
  -7  -4  -3  351.76   18.40
  -7   4  -4  556.44   32.30
   7   4   4  611.24   29.40
  -7   4  -4  625.04   24.70
  -7  -4  -4  635.54   28.20
  -7  -4  -4  570.74   25.40
   7  -4   4  594.84   24.30
  -7  -4  -4  605.04   25.40
  -7   4  -5  345.17   24.30
   7   4   5  384.26   22.20
  -7  -4  -5  379.26   18.70
  -7  -4  -5  363.36   17.70
  -7  -4  -5  350.96   20.20
   7  -4   5  404.36   17.20
   7   4   6  138.29   14.60
  -7   4  -6  136.69   16.80
  -7  -4  -6  138.89   10.20
  -7  -4  -6  143.69   12.30
   7   4   7  206.88   18.00
  -7   4  -7  210.18   21.30
  -7  -4  -7  195.88   14.00
  -7  -4  -7  198.38   13.20
  -7   4  -8    4.90    8.80
   7   4   8    3.10    8.20
  -7  -4  -8   -2.40    6.90
  -7  -4  -8    7.40    5.20
  -7   4  -9  219.68   24.40
  -7  -4  -9  309.87   19.10
  -7  -4  -9  273.87   18.20
  -7   4 -10  780.62   43.20
  -7  -4 -10  656.83   34.70
  -7   4 -11   37.20   14.00
  -7  -4 -11   21.50    9.10
  -7   4 -12    3.90   12.70
  -7  -4 -12   13.90    9.60
  -7   4 -13   11.90   14.50
  -7  -4 -13   15.00   11.30
  -7   4 -14   18.80   16.40
  -7  -4 -14    0.60   11.50
  -7   4 -15  114.39   24.30
  -7  -4 -15   65.89   18.20
  -7   5  16   16.80   11.80
  -7  -5  16   50.19   14.00
  -7   5  15    3.00    9.60
  -7  -5  15   15.40   10.70
  -7   5  14    7.30    9.70
  -7  -5  14   20.50   10.30
  -7   5  13  132.49   14.60
  -7  -5  13   97.49   14.40
  -7   5  12  248.38   17.50
  -7  -5  12  266.27   19.50
  -7   5  11  362.66   20.70
  -7  -5  11  366.36   22.50
  -7  -5  11  367.96   19.00
  -7   5  10   68.39    9.90
  -7  -5  10   69.39   11.20
  -7  -5  10   66.09    8.80
  -7   5   9  138.59   20.10
  -7   5   9  128.59   12.10
  -7  -5   9  127.49   10.50
  -7  -5   9  115.89   12.90
  -7  -5   9  136.29   11.60
  -7   5   8   23.60   11.80
  -7   5   8   30.70    7.10
  -7  -5   8   53.79    9.10
  -7  -5   8   33.80    6.90
  -7  -5   8   31.00    5.80
  -7   5   7  430.76   21.40
  -7   5   7  488.15   33.40
  -7  -5   7  485.35   22.10
  -7  -5   7  467.55   21.20
  -7  -5   7  467.85   23.50
  -7   5   6  700.93   27.60
  -7   5   6  635.84   28.20
  -7   5   6  693.23   40.60
  -7  -5   6  671.93   29.80
  -7  -5   6  643.54   27.50
  -7  -5   6  640.54   28.30
  -7   5   5  736.83   27.90
  -7   5   5  726.23   41.80
  -7   5   5  671.23   29.50
  -7  -5   5  700.23   30.40
  -7  -5   5  670.33   28.30
  -7  -5   5  674.23   29.10
  -7   5   4 1295.47   46.90
  -7   5   4 1285.97   50.99
  -7   5   4 1295.17   63.09
  -7  -5   4 1336.57   48.20
  -7  -5   4 1278.57   50.19
  -7  -5   4 1274.17   49.90
  -7  -5   4 1310.27   51.59
  -7   5   3  193.28   22.40
  -7   5   3  170.18   12.30
  -7   5   3  155.88    8.90
  -7  -5   3  144.29   10.80
  -7  -5   3  150.58    9.80
  -7  -5   3  163.98   11.80
  -7  -5   3  148.79   10.90
  -7   5   2  659.63   40.20
  -7   5   2  690.63   24.70
  -7  -5   2  614.84   27.30
  -7  -5   2  654.93   28.30
  -7  -5   2  698.13   27.70
  -7   5   1  393.66   29.70
  -7   5   1  374.66   21.00
  -7   5   1  387.66   14.90
  -7  -5   1  388.26   17.70
  -7  -5   1  409.16   19.20
  -7  -5   1  392.36   18.70
  -7   5   0  642.94   39.40
  -7  -5   0  677.33   28.90
  -7  -5   0  635.64   27.00
  -7  -5   0  671.93   27.60
   7  -5   0  661.43   29.30
  -7   5  -1 1644.34   73.59
   7   5   1 1660.43   64.89
  -7  -5  -1 1493.95   59.79
   7  -5   1 1654.43   59.79
  -7  -5  -1 1627.94   61.99
  -7  -5  -1 1590.44   57.79
  -7  -5  -1 1537.35   60.29
   7   5   2  491.05   27.50
  -7   5  -2  523.75   33.00
  -7  -5  -2  460.25   21.80
  -7  -5  -2  472.95   22.70
  -7  -5  -2  449.86   21.10
   7  -5   2  519.15   22.60
  -7   5  -3    8.30   10.10
   7   5   3   12.30    8.40
  -7  -5  -3   14.70    5.70
   7  -5   3   14.40    5.50
  -7  -5  -3   12.90    3.80
  -7  -5  -3   12.00    5.40
   7   5   4  507.05   27.90
  -7   5  -4  479.65   32.50
  -7  -5  -4  533.95   24.70
   7  -5   4  490.55   22.80
  -7  -5  -4  523.35   23.20
  -7  -5  -4  532.75   23.60
   7   5   5  184.08   17.60
  -7   5  -5  169.98   20.60
  -7  -5  -5  162.28   12.90
   7  -5   5  126.99   11.10
  -7  -5  -5  155.38   10.80
  -7  -5  -5  153.58   11.50
   7   5   6  676.03   34.10
  -7   5  -6  689.83   40.10
  -7  -5  -6  694.13   29.40
  -7  -5  -6  682.03   30.20
  -7   5  -7  476.85   32.40
   7   5   7  479.35   27.40
  -7  -5  -7  464.65   22.30
  -7  -5  -7  421.16   22.50
   7   5   8   89.89   14.30
  -7   5  -8   81.39   16.60
  -7  -5  -8   78.49   10.30
  -7  -5  -8  107.59   12.20
   7   5   9  279.27   21.80
  -7   5  -9  313.27   30.10
  -7  -5  -9  285.47   19.30
  -7   5 -10    4.30   12.80
  -7  -5 -10   11.30    7.70
  -7   5 -11  114.29   21.30
  -7  -5 -11   97.49   14.60
  -7   5 -12    9.70   14.50
  -7  -5 -12    5.00    9.80
  -7   5 -13   79.79   21.90
  -7  -5 -13   72.29   15.10
  -7   5 -14  117.89   25.10
  -7  -5 -14   52.39   15.70
  -7   5 -15   -5.70   19.00
  -7  -5 -15  -27.60   12.60
  -7   6  15   75.99   14.50
  -7  -6  15   94.29   16.20
  -7   6  14   -3.30    9.80
  -7  -6  14   -9.50    9.60
  -7   6  13   44.70   10.90
  -7  -6  13   25.80   10.70
  -7   6  12   62.49   11.90
  -7  -6  12   82.69   13.70
  -7   6  11  303.47   20.10
  -7  -6  11  354.96   18.90
  -7  -6  11  346.57   22.70
  -7   6  10   48.50    9.60
  -7  -6  10   65.79    9.40
  -7  -6  10   34.50   10.00
  -7   6   9  534.85   25.80
  -7  -6   9  536.15   28.10
  -7  -6   9  525.25   24.70
  -7   6   8  369.76   19.70
  -7   6   8  359.96   33.60
  -7  -6   8  384.16   22.30
  -7  -6   8  376.36   19.50
  -7   6   7  246.88   15.20
  -7   6   7  249.38   28.50
  -7  -6   7  266.07   14.80
  -7  -6   7  229.78   14.40
  -7  -6   7  230.98   17.00
  -7   6   6  324.27   31.70
  -7   6   6  290.47   15.50
  -7  -6   6  277.77   16.10
  -7  -6   6  267.77   15.40
  -7  -6   6  273.77   17.90
  -7   6   5  217.28   26.00
  -7   6   5  198.28   12.80
  -7  -6   5  189.28   12.90
  -7  -6   5  207.78   15.10
  -7  -6   5  205.78   12.60
  -7   6   4   24.10    5.60
  -7   6   4   18.50   12.40
  -7  -6   4   24.30    6.30
  -7  -6   4   36.50    7.80
  -7  -6   4   35.30    7.00
  -7  -6   4   34.10    5.70
  -7   6   3 2604.34   87.69
  -7   6   3 2497.75  109.59
  -7  -6   3 2453.75   87.89
  -7  -6   3 2474.25   94.49
  -7  -6   3 2608.24   91.39
  -7  -6   3 2457.15   93.29
  -7   6   2  122.79    8.10
  -7   6   2   98.59   19.20
  -7  -6   2  100.39   10.40
  -7  -6   2   98.79    9.50
  -7  -6   2   91.69    8.40
  -7   6   1  626.24   22.90
  -7   6   1  564.54   39.80
  -7  -6   1  579.84   26.50
  -7  -6   1  602.24   25.90
  -7  -6   1  579.34   25.90
   7   6   0  937.91   45.30
  -7   6   0  971.90   34.20
  -7   6   0  924.61   53.59
  -7  -6   0  949.40   39.80
  -7  -6   0 1018.30   39.20
  -7  -6   0  962.10   38.20
   7  -6   0  998.50   41.50
  -7  -6   0  968.20   39.40
   7   6   1   66.69   13.40
  -7   6  -1   31.80   13.70
  -7  -6  -1   48.90    7.30
  -7  -6  -1   31.50    5.50
   7  -6   1   38.30    8.40
  -7  -6  -1   45.80    7.70
   7   6   2  444.46   28.00
  -7   6  -2  466.45   34.70
  -7  -6  -2  462.75   21.90
   7  -6   2  470.25   23.60
  -7  -6  -2  485.65   22.50
  -7  -6  -2  436.66   21.30
  -7   6  -3  897.81   48.60
   7   6   3  808.42   39.40
  -7  -6  -3  772.82   32.60
  -7  -6  -3  782.82   33.50
  -7  -6  -3  743.83   33.00
   7  -6   3  801.22   34.10
   7   6   4   76.89   13.90
  -7   6  -4   72.89   16.60
   7  -6   4   76.99    9.80
  -7  -6  -4   82.19    8.60
  -7  -6  -4   77.59    9.60
   7   6   5  822.32   39.70
  -7   6  -5  806.72   47.60
  -7  -6  -5  819.72   33.30
  -7  -6  -5  762.52   34.10
   7  -6   5  783.22   33.90
   7   6   6    3.60    9.00
  -7   6  -6   13.10   12.20
  -7  -6  -6    4.90    4.50
  -7  -6  -6   16.30    7.10
   7   6   7   17.40   10.80
  -7   6  -7  -12.10   10.20
  -7  -6  -7   -8.80    6.10
  -7  -6  -7    1.00    4.80
  -7   6  -8   18.90   13.00
   7   6   8   25.50   11.60
  -7  -6  -8   34.90    9.00
  -7  -6  -8   19.50    6.90
   7   6   9  155.78   19.20
  -7   6  -9  214.78   27.40
  -7  -6  -9  169.88   16.30
  -7   6 -10  198.48   28.10
  -7  -6 -10  152.68   16.60
  -7   6 -11   60.29   19.20
  -7  -6 -11   49.90   11.70
  -7   6 -12    9.00   15.60
  -7  -6 -12  -12.80    8.60
  -7   6 -13    0.30   18.20
  -7  -6 -13    3.20   10.70
  -7   6 -14   13.10   19.90
  -7  -6 -14   -9.40   12.00
  -7   7  14   13.60   10.30
  -7  -7  14   13.10   11.40
  -7   7  13  120.89   15.40
  -7  -7  13  125.39   17.40
  -7   7  12   70.99   13.00
  -7  -7  12   65.59   14.30
  -7   7  11  227.98   18.00
  -7  -7  11  239.08   16.70
  -7  -7  11  239.78   21.60
  -7   7  10    9.80    8.80
  -7  -7  10   -2.10    7.10
  -7  -7  10    5.00    9.10
  -7   7   9   -7.70    6.80
  -7  -7   9   -2.10    6.10
  -7  -7   9   -0.90    7.70
  -7   7   8   83.09   10.80
  -7  -7   8   60.19   11.80
  -7  -7   8   57.29    9.70
  -7   7   7 1197.08   46.90
  -7   7   7 1152.68   63.99
  -7  -7   7 1198.78   46.30
  -7  -7   7 1150.58   49.99
  -7   7   6   14.10   14.20
  -7   7   6   12.20    6.80
  -7  -7   6   22.90    5.30
  -7  -7   6   16.30    6.70
  -7  -7   6    5.90    7.60
  -7   7   5  520.75   39.30
  -7   7   5  490.85   23.50
  -7  -7   5  513.15   25.40
  -7  -7   5  499.45   24.10
  -7  -7   5  557.64   24.70
  -7  -7   5  529.95   27.50
  -7   7   4   56.59   17.30
  -7   7   4   36.30    7.30
  -7  -7   4   33.00    7.40
  -7  -7   4   35.30    9.20
  -7  -7   4   57.49    8.20
  -7  -7   4   39.40    6.10
  -7   7   3   44.70    6.90
  -7   7   3    9.80   13.40
  -7  -7   3   36.40    6.00
  -7  -7   3   26.70    6.90
  -7  -7   3   30.60    6.50
  -7   7   2  156.68   24.70
  -7   7   2  163.38   10.80
  -7  -7   2  163.98   11.40
  -7  -7   2  176.18   12.70
  -7  -7   2  195.78   12.60
  -7   7   1  533.05   21.60
   7   7  -1  516.65   32.00
  -7   7   1  465.65   39.20
  -7  -7   1  548.75   24.40
  -7  -7   1  531.85   24.50
  -7  -7   1  524.85   24.60
  -7  -7   1  498.55   24.20
  -7   7   0   44.30    5.40
   7   7   0   36.90   12.10
  -7   7   0   45.90   17.10
  -7  -7   0   42.90    7.60
  -7  -7   0   42.20    7.80
  -7  -7   0   32.40    6.10
   7  -7   0   44.10   10.10
   7   7   1 1644.04   71.69
  -7   7  -1 1658.03   83.89
   7  -7   1 1646.84   66.79
  -7  -7  -1 1768.12   66.39
  -7  -7  -1 1761.72   63.09
  -7   7  -2   81.69   19.10
   7   7   2   83.59   15.90
  -7  -7  -2   80.79    8.70
  -7  -7  -2   63.49    9.20
   7  -7   2   61.39   11.20
   7   7   3  163.78   19.70
  -7   7  -3  108.89   21.30
  -7  -7  -3  132.69   11.00
  -7  -7  -3  136.19   12.70
   7  -7   3  154.88   15.50
   7   7   4    6.30    9.80
  -7   7  -4    2.70   12.60
  -7  -7  -4   -2.30    3.80
   7  -7   4   -0.10    7.30
  -7  -7  -4   -1.30    5.60
   7   7   5  298.17   26.20
  -7   7  -5  265.77   31.80
  -7  -7  -5  287.07   17.30
   7  -7   5  282.57   18.50
  -7  -7  -5  263.07   16.60
  -7   7  -6  278.97   32.60
   7   7   6  276.37   25.10
  -7  -7  -6  280.07   17.50
   7  -7   6  344.07   19.60
  -7  -7  -6  238.28   16.80
   7   7   7  405.66   28.50
  -7   7  -7  437.06   40.80
  -7  -7  -7  406.26   23.10
  -7  -7  -7  422.96   22.30
  -7   7  -8   26.70   16.40
   7   7   8   30.30   13.00
  -7  -7  -8   23.40    8.00
   7   7   9   61.79   14.30
  -7   7  -9   65.09   19.70
  -7  -7  -9   80.79   12.40
  -7   7 -10    3.40   16.00
   7   7  10   17.20   13.90
  -7  -7 -10   14.20    9.00
  -7   7 -11  140.89   28.60
  -7  -7 -11  111.09   16.60
  -7   7 -12    8.10   18.00
  -7  -7 -12   -0.20    9.80
  -7   7 -13   49.99   24.00
  -7  -7 -13   29.40   14.00
  -7   8  13  146.79   17.50
  -7  -8  13  157.18   20.50
  -7   8  12   87.39   14.40
  -7  -8  12   89.59   16.00
  -7   8  11   39.30   11.00
  -7  -8  11   46.90   11.10
  -7  -8  11   41.00   13.20
  -7   8  10   80.89   13.00
  -7  -8  10  109.89   16.20
  -7  -8  10  113.89   12.90
  -7   8   9  193.58   16.70
  -7  -8   9  201.98   15.80
  -7  -8   9  194.58   20.00
  -7   8   8    7.90    8.70
  -7  -8   8   33.40    8.40
  -7  -8   8   10.00    9.30
  -7   8   7  353.66   20.50
  -7  -8   7  347.67   20.00
  -7  -8   7  363.46   24.30
  -7   8   6   26.50   15.70
  -7   8   6    3.40    6.90
  -7  -8   6   12.70    8.70
  -7  -8   6   13.20    7.20
  -7   8   5   22.30   15.50
  -7   8   5   -0.80    6.70
  -7  -8   5    0.90    7.80
  -7  -8   5   -5.10    5.50
  -7  -8   5    6.40    6.40
  -7   8   4  153.28   12.90
   7   8  -4  175.08   22.90
  -7   8   4  193.58   29.20
  -7  -8   4  133.99   13.40
  -7  -8   4  147.29   11.60
  -7  -8   4  152.18   12.40
  -7   8   3  985.30   60.29
   7   8  -3  900.61   49.90
  -7   8   3  984.80   38.60
  -7  -8   3 1007.60   40.90
  -7  -8   3  981.00   40.90
  -7  -8   3  942.71   39.60
   7   8  -2  149.49   21.00
  -7   8   2  146.79   26.70
  -7   8   2  136.69   11.10
  -7  -8   2  145.99   11.40
  -7  -8   2  129.39   12.60
  -7  -8   2  136.49   12.30
  -7   8   1  121.59   10.00
  -7   8   1   64.89   20.10
   7   8  -1  119.19   19.60
  -7  -8   1  124.49   11.50
  -7  -8   1   97.79   11.40
   7   8   0    0.90   11.30
  -7   8   0   -7.30   14.50
  -7  -8   0    3.40    5.90
  -7  -8   0    2.40    4.30
   7   8   1   63.19   16.10
  -7   8  -1   32.20   18.50
   7  -8   1   55.79   11.90
  -7  -8  -1   58.59    8.10
  -7  -8  -1   64.29    9.60
   7   8   2   63.59   15.50
  -7   8  -2   50.89   20.10
   7  -8   2   51.59   11.40
  -7  -8  -2   76.89   10.50
  -7  -8  -2   60.29    8.30
  -7   8  -3  448.46   43.90
   7   8   3  513.45   33.10
  -7  -8  -3  454.55   24.00
  -7  -8  -3  469.75   23.70
   7  -8   3  481.45   27.30
  -7   8  -4  168.58   28.80
   7   8   4  271.57   26.10
  -7  -8  -4  200.98   15.40
   7  -8   4  223.58   20.40
  -7  -8  -4  223.68   15.30
  -7   8  -5  527.95   44.40
   7   8   5  542.55   35.10
  -7  -8  -5  565.14   27.40
   7  -8   5  608.84   31.00
  -7  -8  -5  567.34   28.40
  -7   8  -6  182.48   29.20
   7   8   6  156.98   21.00
   7  -8   6  131.49   15.90
  -7  -8  -6  134.39   13.70
  -7  -8  -6  126.69   13.50
  -7   8  -7   34.80   18.80
   7   8   7   -2.00   12.60
  -7  -8  -7   24.10    8.80
  -7  -8  -7   23.60    7.90
  -7   8  -8    3.90   17.00
   7   8   8   -3.10   13.30
  -7  -8  -8   -2.40    6.60
   7   8   9  246.88   26.40
  -7   8  -9  260.47   35.70
  -7  -8  -9  257.47   20.40
   7   8  10   68.49   17.60
  -7   8 -10   81.09   25.10
  -7  -8 -10   72.09   13.80
  -7   8 -11   96.79   27.90
  -7  -8 -11   69.69   14.40
  -7   8 -12   20.30   22.60
  -7  -8 -12   44.00   14.00
  -7   9  12    7.50   11.30
  -7  -9  12   -0.30   12.20
  -7   9  11  272.07   20.80
  -7  -9  11  252.27   19.80
  -7  -9  11  214.48   23.60
  -7   9  10   19.20   10.40
  -7  -9  10   34.40   13.30
  -7  -9  10    9.60    9.30
  -7   9   9  167.08   16.40
  -7  -9   9  221.18   18.60
  -7  -9   9  184.18   21.00
  -7   9   8  102.39   13.20
   7   9  -8  104.79   22.10
  -7  -9   8   84.39   12.30
  -7  -9   8   89.39   15.60
   7   9  -7  172.58   26.00
  -7   9   7  191.08   16.50
  -7  -9   7  174.18   16.50
  -7  -9   7  190.18   20.00
   7   9  -6  132.09   23.10
  -7   9   6  114.19   13.20
  -7  -9   6  123.09   13.30
  -7  -9   6  113.29   13.30
  -7  -9   6   90.59   14.70
   7   9  -5  142.19   23.80
  -7   9   5  129.89   13.10
  -7  -9   5  122.19   13.50
  -7  -9   5  131.99   16.30
   7   9  -4    6.50   14.20
  -7   9   4    8.70    7.20
  -7   9   4    7.40   16.70
  -7  -9   4    9.00    7.40
  -7   9   3   27.70   18.80
  -7   9   3   28.20    7.80
   7   9  -3   18.20   14.20
  -7  -9   3   55.79   10.00
   7   9  -2   -4.20   13.30
  -7   9   2    0.40    6.30
  -7   9   2    7.30   17.50
  -7  -9   2    1.70    5.90
   7   9  -1   75.89   17.60
  -7   9   1   71.59   23.60
  -7  -9   1   48.20    9.70
  -7  -9   1   82.99   10.20
  -7   9   0  330.87   40.10
   7   9   0  331.97   30.90
  -7  -9   0  307.77   18.70
  -7  -9   0  300.47   18.80
   7   9   1  502.15   34.90
  -7   9  -1  461.35   48.30
  -7  -9  -1  472.45   25.10
  -7  -9  -1  520.85   25.90
   7   9   2   56.79   16.90
  -7   9  -2   20.90   18.80
   7  -9   2   48.90   12.70
  -7  -9  -2   49.99    8.80
  -7  -9  -2   49.30   10.00
  -7   9  -3   22.00   19.60
   7   9   3   27.60   14.00
   7  -9   3   23.20   11.20
  -7  -9  -3   25.60    7.40
  -7  -9  -3   24.10    8.40
   7   9   4   65.99   17.30
  -7   9  -4   44.60   22.40
   7  -9   4   74.39   14.30
  -7  -9  -4   79.69   10.90
  -7  -9  -4   78.29   11.50
  -7   9  -5  214.18   33.40
   7   9   5  185.78   23.60
  -7  -9  -5  167.28   15.80
  -7  -9  -5  174.28   15.90
   7  -9   5  143.89   18.00
   7   9   6    3.40   13.30
  -7   9  -6    8.40   18.20
  -7  -9  -6   -2.20    8.00
  -7  -9  -6    6.20    7.10
   7  -9   6   -0.20   10.00
  -7   9  -7  154.18   30.20
   7   9   7  145.49   22.10
  -7  -9  -7  137.99   15.30
   7   9   8  135.39   22.30
  -7   9  -8  187.28   33.40
  -7  -9  -8  102.19   14.70
   7   9   9   50.29   17.80
  -7   9  -9   20.60   21.20
  -7  -9  -9   22.90   10.50
  -7   9 -10   53.89   25.40
   7   9  10   46.10   17.60
  -7  -9 -10   45.60   12.30
  -7   9 -11  231.58   40.40
   7   9  11  224.18   27.50
  -7 -10  11   -3.30   10.30
  -7  10  10   13.10   11.30
   7  10 -10   61.79   23.10
  -7 -10  10   53.99   12.80
  -7 -10  10   38.60   15.00
  -7  10   9  111.49   14.90
   7  10  -9  115.09   25.30
  -7 -10   9  118.89   15.90
  -7 -10   9  125.19   18.90
   7  10  -8  -22.50   15.30
  -7  10   8   -7.10    8.80
  -7 -10   8   20.30   11.70
  -7 -10   8   13.30    9.60
   7  10  -7  111.09   23.40
  -7  10   7   79.79   12.80
  -7 -10   7   79.49   13.10
  -7 -10   7   50.99   14.90
  -7  10   6   52.79   10.80
   7  10  -6   42.20   19.70
  -7 -10   6   38.30   10.20
  -7 -10   6   -8.90    9.90
  -7  10   5    2.10    8.20
   7  10  -5   -2.50   15.30
  -7 -10   5   -4.90    7.10
   7  10  -4  119.49   23.90
  -7  10   4  161.48   14.60
  -7 -10   4  152.18   15.70
   7  10  -3  126.69   23.80
  -7 -10   3  156.98   15.70
   7  10  -2  117.19   22.10
  -7 -10   2  134.39   14.60
   7  10  -1   -1.30   13.80
  -7  10   1    1.70   20.30
  -7 -10   1    8.50    7.40
  -7  10   0   42.10   24.10
   7  10   0   52.09   17.70
  -7 -10   0   42.60    9.80
   7  10   1    7.60   15.00
  -7  10  -1    1.30   21.20
  -7 -10  -1    7.40    7.80
  -7  10  -2   -0.30   21.00
   7  10   2    9.60   13.60
  -7 -10  -2    4.30    7.90
  -7  10  -3  115.49   30.90
   7  10   3  135.49   23.00
  -7 -10  -3  116.79   14.10
   7 -10   3  135.19   19.40
   7  10   4  162.28   24.60
  -7  10  -4  195.28   35.20
   7 -10   4  144.39   19.90
  -7 -10  -4  164.38   16.60
   7  10   5   56.09   19.40
  -7  10  -5   65.79   25.90
   7 -10   5   35.20   13.80
  -7 -10  -5   45.60   11.00
  -7  10  -6   21.10   23.40
   7  10   6   28.10   17.00
  -7 -10  -6   30.60   10.40
   7 -10   6   33.70   13.40
   7  10   7  328.87   31.90
  -7  10  -7  317.77   44.40
  -7  10  -8   51.49   25.90
   7  10   8   33.20   18.10
  -7  10  -9   98.59   31.70
   7  10   9  155.98   24.90
   7  11  -7   33.70   20.70
  -7 -11   7   44.00   12.10
   7  11  -6   41.90   20.80
  -7 -11   6   69.19   12.80
   7  11  -5   42.30   19.30
  -7 -11   5   22.30   10.10
   7  11  -4   -0.80   16.80
  -7 -11   4   -1.10    8.60
   7  11  -3   19.90   17.90
  -7 -11   3   28.60   10.30
   7  11  -2   47.50   19.40
  -7 -11   2   21.00    9.00
   7  11  -1   23.80   17.30
  -7 -11   1    8.10    8.30
   7  11   0   49.00   19.20
  -7 -11   0   79.29   12.90
   7  11   1  113.29   22.90
  -7 -11  -1   82.69   13.20
   7  11   2   74.39   20.50
  -7 -11  -2   79.79   12.90
   7  11   3   60.09   19.50
  -7 -11  -3   73.39   12.70
   7  11   4   76.69   20.20
  -7 -11  -4   61.69   12.80
   7 -11   4   29.30   13.80
   7  11   5  112.59   22.90
  -7 -11  -5  104.39   15.20
   7 -11   5  105.39   19.80
   7  11   6   19.40   17.60
   7 -11   6   11.20   13.00
  -8   0  17    9.80   10.30
  -8   0  16  382.46   24.10
  -8   0  15    3.80    8.20
  -8   0  14  139.39   14.70
  -8   0  13    1.90    6.90
  -8   0  12  618.74   28.60
  -8   0  11    6.00    5.80
  -8   0  11   -5.80    4.80
  -8   0  10  853.31   38.90
  -8   0  10  865.41   35.20
  -8   0   9    0.80    4.70
  -8   0   9    1.00    4.90
  -8   0   9    7.50    5.50
  -8   0   8    8.40    4.90
  -8   0   8    9.00    6.00
  -8   0   8   13.20    5.60
  -8   0   8    9.90    4.70
  -8   0   7    2.00    4.20
  -8   0   7    1.00    3.70
  -8   0   7    2.10    4.40
  -8   0   7    7.40    4.50
  -8   0   6 4557.74  154.78
  -8   0   6 4511.95  166.88
  -8   0   6 4501.55  152.88
  -8   0   6 4709.23  167.28
  -8   0   5   -0.80    3.50
  -8   0   5   -6.00    3.40
  -8   0   5    1.40    4.90
  -8   0   5    0.10    2.70
  -8   0   5   -3.60    4.10
  -8   0   4  758.92   32.40
  -8   0   4  727.73   32.50
  -8   0   4  794.52   31.30
  -8   0   4  836.62   34.00
  -8   0   3    1.00    3.20
  -8   0   3    4.40    3.70
  -8   0   3    4.30    5.00
  -8   0   3    3.30    4.20
  -8   0   2  301.27   16.30
  -8   0   2  288.97   14.10
  -8   0   2  290.57   15.30
  -8   0   2  273.47   15.80
  -8   0   1   -0.20    3.00
  -8   0   1   -1.00    4.90
  -8   0   1    5.00    4.80
  -8   0   1    0.70    2.60
  -8   0   0 1615.34   59.09
  -8   0   0 1592.24   59.09
  -8   0   0 1633.04   60.09
  -8   0   0 1646.34   63.79
  -8   0  -1    1.10    5.30
  -8   0  -1   -3.40    5.00
  -8   0  -2 5798.32  191.98
  -8   0  -2 5623.24  209.38
  -8   0  -3   -9.30    5.70
  -8   0  -3    7.30    6.40
  -8   0  -4    3.40    7.00
  -8   0  -4   19.30    8.10
  -8   0  -5   -3.60    6.30
  -8   0  -5   -2.30    7.40
  -8   0  -5    1.90    2.80
  -8   0  -5    1.10    2.40
  -8   0  -6  237.68   13.20
  -8   0  -6  234.58   12.60
  -8   0  -7    4.50    4.40
  -8   0  -7    2.30    4.20
  -8   0  -8   15.20    5.80
  -8   0  -9    2.60    5.60
  -8   0 -10  145.99   14.80
  -8   0 -11   -1.30    7.10
  -8   0 -12  245.18   23.10
  -8   0 -13    4.60   10.10
  -8   0 -14   -5.70   10.80
  -8   0 -15   -3.80   12.80
  -8   0 -16   84.89   20.90
  -8   1  17   -5.40   10.10
  -8  -1  17    5.50   10.20
  -8   1  16   63.19   12.70
  -8  -1  16   63.89   12.90
  -8   1  15   33.00    9.80
  -8  -1  15   35.80   10.20
  -8   1  14  515.55   27.20
  -8  -1  14  550.34   27.90
  -8   1  13   -1.30    6.80
  -8  -1  13    1.20    6.60
  -8   1  12  195.68   14.60
  -8  -1  12  182.18   14.40
  -8   1  11   55.99   10.20
  -8   1  11   79.39    9.50
  -8   1  11   69.49   10.00
  -8  -1  11   63.79    9.10
  -8  -1  11   95.99   10.40
  -8   1  10 1303.67   57.39
  -8   1  10 1394.76   55.09
  -8   1  10 1338.47   51.09
  -8  -1  10 1310.67   55.19
  -8  -1  10 1411.76   52.09
  -8   1   9  173.08   12.90
  -8   1   9  158.88   14.90
  -8   1   9  160.48   11.40
  -8  -1   9  160.28   11.90
  -8  -1   9  155.58   12.20
  -8  -1   9  175.98   11.40
  -8   1   8  582.74   26.50
  -8   1   8  546.65   28.60
  -8   1   8  577.94   23.90
  -8  -1   8  585.54   26.80
  -8  -1   8  573.24   24.30
  -8  -1   8  557.14   23.80
  -8   1   7    3.20    5.30
  -8   1   7   -0.70    3.30
  -8   1   7   11.10    5.00
  -8  -1   7    5.80    3.90
  -8  -1   7    4.50    4.00
  -8  -1   7    8.90    5.10
  -8  -1   7    1.60    4.70
  -8   1   6  624.64   27.40
  -8   1   6  634.84   29.80
  -8   1   6  645.74   26.70
  -8   1   6  621.64   24.10
  -8  -1   6  610.84   24.60
  -8  -1   6  623.94   27.80
  -8  -1   6  595.24   27.20
  -8  -1   6  618.84   25.50
  -8   1   5   10.90    6.30
  -8   1   5   16.20    5.20
  -8   1   5   19.10    3.40
  -8   1   5   31.10    6.70
  -8   1   5   20.00    5.30
  -8  -1   5   30.20    6.90
  -8  -1   5   22.40    5.30
  -8  -1   5   31.20    6.00
  -8  -1   5   16.80    4.30
  -8  -1   5   27.40    4.30
  -8   1   4  394.06   20.20
  -8   1   4  326.97   18.20
  -8   1   4  373.86   19.10
  -8   1   4  401.56   18.80
  -8  -1   4  353.66   14.50
  -8  -1   4  404.46   21.40
  -8  -1   4  371.26   18.50
  -8  -1   4  390.46   17.60
  -8  -1   4  364.96   17.40
  -8   1   3  184.88   12.90
  -8   1   3  162.18   12.10
  -8   1   3  182.38   11.20
  -8   1   3  155.58   12.10
  -8  -1   3  160.08   11.30
  -8  -1   3  182.58   13.40
  -8  -1   3  169.08   11.10
  -8  -1   3  177.28    9.80
  -8   1   2 5404.86  200.48
  -8   1   2 5353.36  184.48
  -8   1   2 5926.01  197.18
  -8   1   2 5548.54  198.78
  -8  -1   2 5462.15  195.98
  -8  -1   2 5731.13  199.98
  -8  -1   2 5449.06  200.18
  -8  -1   2 5138.69  182.88
  -8   1   1  519.15   24.60
  -8   1   1  505.25   21.00
  -8   1   1  527.55   24.20
  -8   1   1  531.35   23.30
  -8  -1   1  505.25   20.20
  -8  -1   1  515.55   24.20
  -8  -1   1  463.25   22.10
  -8  -1   1  498.95   23.90
  -8   1   0   14.80    6.40
  -8   1   0   10.60    4.60
  -8   1   0   17.10    3.00
  -8   1   0   19.40    6.40
  -8  -1   0   13.50    4.90
  -8  -1   0   18.00    5.80
  -8  -1   0   14.00    2.30
  -8  -1   0   22.50    5.90
  -8   1  -1  131.29   12.50
  -8   1  -1  111.69   11.50
  -8  -1  -1  120.39   10.20
  -8  -1  -1  112.69    5.50
  -8  -1  -1  125.79   11.90
  -8  -1  -1  129.69   11.10
  -8   1  -2   65.09   10.10
  -8  -1  -2   66.69    9.30
  -8  -1  -2   58.89    7.20
  -8   1  -3   41.20    9.20
  -8  -1  -3   45.40    8.90
  -8  -1  -3   50.59    8.20
  -8  -1  -3   49.80    6.80
  -8  -1  -3   46.60    3.40
  -8   1  -4  342.87   21.60
  -8  -1  -4  305.77   18.20
  -8  -1  -4  321.57   20.30
  -8  -1  -4  333.87   13.70
  -8  -1  -4  351.96   17.30
  -8   1  -5    2.70    3.40
  -8   1  -5    5.20    2.20
  -8  -1  -5   -7.90    7.20
  -8  -1  -5    4.70    6.80
  -8  -1  -5    7.80    2.80
  -8  -1  -5    4.50    4.90
  -8   1  -6  863.11   37.40
  -8   1  -6  949.80   35.60
  -8  -1  -6  978.50   39.70
  -8  -1  -6  895.11   36.20
  -8  -1  -6  939.41   39.50
  -8   1  -7   95.99    9.90
  -8   1  -7  121.79    8.80
  -8  -1  -7  112.99   11.80
  -8  -1  -7   72.39    7.80
  -8  -1  -7   78.49   11.90
  -8   1  -8  445.16   23.50
  -8  -1  -8  415.76   21.40
  -8   1  -9   96.89   12.40
  -8  -1  -9   84.49   10.60
  -8   1 -10  160.28   17.10
  -8  -1 -10  179.38   16.50
  -8   1 -11   38.80   11.10
  -8  -1 -11   29.30    9.50
  -8   1 -12   18.20   10.60
  -8  -1 -12   21.30   10.00
  -8   1 -13    5.70   11.20
  -8  -1 -13   -4.70    9.60
  -8   1 -14   25.20   13.50
  -8  -1 -14   -1.40   11.30
  -8   1 -15    7.20   14.80
  -8  -1 -15    5.30   13.10
  -8   2  17    4.10   11.00
  -8  -2  17    1.10   10.00
  -8   2  16  163.28   17.20
  -8  -2  16  172.08   17.90
  -8   2  15    0.80    8.50
  -8  -2  15   18.00    9.10
  -8   2  14  187.68   16.40
  -8   2  14  201.38   16.60
  -8  -2  14  166.08   16.20
  -8   2  13  221.88   16.70
  -8   2  13  233.18   16.60
  -8  -2  13  245.78   17.30
  -8   2  12  136.99   13.20
  -8   2  12  117.59   11.90
  -8  -2  12  125.89   13.10
  -8   2  11  330.07   18.70
  -8   2  11  290.47   21.80
  -8   2  11  305.97   17.50
  -8  -2  11  307.57   18.20
  -8  -2  11  291.77   18.10
  -8   2  10  483.45   22.00
  -8   2  10  447.56   27.40
  -8   2  10  490.85   23.50
  -8  -2  10  442.66   22.90
  -8  -2  10  464.15   23.60
  -8  -2  10  464.85   20.60
  -8   2   9   41.50    9.40
  -8   2   9   50.09    7.80
  -8   2   9   57.49    7.30
  -8  -2   9   29.80    6.50
  -8  -2   9   38.20    7.20
  -8  -2   9   50.89    7.50
  -8   2   8   50.39   10.20
  -8   2   8   51.09    7.70
  -8   2   8   66.69    7.30
  -8  -2   8   61.09    7.90
  -8  -2   8   51.89    7.00
  -8  -2   8   60.89    7.60
  -8   2   7  274.87   15.20
  -8   2   7  254.57   18.70
  -8   2   7  254.67   12.80
  -8  -2   7  262.37   13.90
  -8  -2   7  261.57   14.50
  -8  -2   7  242.48   14.00
  -8   2   6 2038.90   69.69
  -8   2   6 2018.80   80.69
  -8   2   6 1982.90   76.39
  -8  -2   6 1938.21   70.79
  -8  -2   6 1970.40   75.39
  -8  -2   6 2059.09   70.19
  -8  -2   6 2028.90   77.19
  -8   2   5 1243.88   48.50
  -8   2   5 1212.88   42.50
  -8   2   5 1293.37   52.79
  -8  -2   5 1181.58   48.30
  -8  -2   5 1148.49   44.20
  -8  -2   5 1177.18   43.90
  -8  -2   5 1228.28   47.10
  -8   2   4   46.80    8.70
  -8   2   4   41.30    3.40
  -8   2   4   41.90    7.20
  -8   2   4   50.39    6.10
  -8  -2   4   45.40    5.00
  -8  -2   4   40.80    5.00
  -8  -2   4   46.30    9.10
  -8  -2   4   42.80    6.40
  -8  -2   4   41.30    6.50
  -8   2   3  693.33   30.70
  -8   2   3  756.32   33.90
  -8   2   3  722.73   29.00
  -8  -2   3  680.83   28.10
  -8  -2   3  680.83   30.00
  -8  -2   3  735.33   34.30
  -8  -2   3  679.13   28.00
  -8   2   2    5.40    5.70
  -8   2   2    4.30    2.80
  -8   2   2   -0.60    4.80
  -8  -2   2   -0.40    4.30
  -8  -2   2    5.10    2.30
  -8  -2   2    3.40    5.50
  -8  -2   2   -2.30    3.60
  -8   2   1  146.89   13.30
  -8   2   1  127.39    7.70
  -8   2   1  112.79   11.40
  -8  -2   1  132.79   13.40
  -8  -2   1  118.99   10.30
  -8  -2   1  152.48    9.80
  -8  -2   1  126.89    7.10
  -8   2   0  484.55   19.00
  -8   2   0  459.45   23.70
  -8   2   0  495.05   24.60
  -8  -2   0  491.95   23.30
   8  -2   0  447.46   18.30
  -8  -2   0  465.95   21.10
  -8  -2   0  456.45   18.70
  -8  -2   0  514.25   25.50
  -8   2  -1  286.47   17.20
  -8   2  -1  292.47   18.20
  -8   2  -1  275.37   12.00
  -8  -2  -1  287.67   12.00
  -8  -2  -1  278.47   18.40
  -8  -2  -1  302.77   16.70
  -8  -2  -1  289.57   15.30
   8  -2   1  286.97   11.30
  -8   2  -2  869.91   39.30
  -8   2  -2  885.61   31.70
  -8   2  -2  803.42   35.50
  -8  -2  -2  846.32   31.90
  -8  -2  -2  916.51   37.70
  -8  -2  -2  845.02   34.10
  -8  -2  -2  825.82   38.60
  -8   2  -3  295.37   16.00
  -8   2  -3  325.37   20.80
  -8   2  -3  313.77   12.40
  -8  -2  -3  282.47   17.80
  -8  -2  -3  309.97   16.80
  -8  -2  -3  304.57   13.10
  -8  -2  -3  323.07   20.30
  -8   2  -4  775.82   28.60
  -8   2  -4  753.32   32.40
  -8  -2  -4  758.42   32.00
  -8  -2  -4  744.43   35.40
  -8  -2  -4  774.42   36.60
  -8  -2  -4  775.02   29.60
  -8   2  -5  170.08   12.60
  -8   2  -5  179.18    8.60
  -8  -2  -5  185.78   16.60
  -8  -2  -5  168.28   13.10
  -8  -2  -5  168.18    9.50
  -8  -2  -5  171.58   14.80
  -8   2  -6  285.07   17.30
  -8   2  -6  305.77   13.20
  -8  -2  -6  251.57   14.00
  -8  -2  -6  295.97   21.00
  -8  -2  -6  269.77   17.10
  -8   2  -7   89.89    7.40
  -8   2  -7   76.09   10.40
  -8  -2  -7   68.09    7.70
  -8  -2  -7   72.69   11.50
  -8   2  -8   85.99   11.70
  -8  -2  -8   80.19    9.20
  -8  -2  -8   95.09   13.40
  -8   2  -9   37.40   10.30
  -8  -2  -9   42.60    8.40
  -8   2 -10    1.90    7.90
  -8  -2 -10    3.80    6.20
  -8   2 -11    4.90    9.10
  -8  -2 -11    5.20    7.70
  -8   2 -12  732.73   42.60
  -8  -2 -12  743.33   39.60
  -8   2 -13   -1.20   11.00
  -8  -2 -13   13.50   10.20
  -8   2 -14   26.20   14.30
  -8  -2 -14   20.20   12.40
  -8   2 -15  -12.80   14.20
  -8  -2 -15   14.90   13.60
  -8   3  17   16.70   11.40
  -8  -3  17    3.10   11.10
  -8   3  16   27.50   11.00
  -8  -3  16   36.90   11.50
  -8   3  15  189.38   17.60
  -8  -3  15  189.98   18.50
  -8   3  14  361.46   22.00
  -8  -3  14  386.96   23.70
  -8   3  13  103.29   12.50
  -8  -3  13   89.29   12.60
  -8   3  12  288.07   18.20
  -8   3  12  350.86   19.40
  -8  -3  12  319.57   20.20
  -8   3  11   44.10    8.20
  -8   3  11   59.49    9.00
  -8   3  11   36.50   10.70
  -8  -3  11   51.79    9.20
  -8   3  10  366.56   25.10
  -8   3  10  312.87   17.60
  -8   3  10  339.97   18.30
  -8  -3  10  320.97   16.80
  -8  -3  10  355.36   19.30
  -8  -3  10  324.47   18.50
  -8   3   9  776.52   32.90
  -8   3   9  764.42   31.10
  -8   3   9  785.92   40.20
  -8  -3   9  748.93   32.50
  -8  -3   9  733.43   30.00
  -8  -3   9  738.13   33.00
  -8   3   8   15.80    6.20
  -8   3   8   14.10    8.50
  -8   3   8    6.00    4.80
  -8  -3   8    9.30    5.60
  -8  -3   8   -0.30    3.30
  -8  -3   8   27.90    6.00
  -8   3   7 1032.30   48.70
  -8   3   7 1026.90   38.10
  -8   3   7 1013.50   41.70
  -8  -3   7 1040.30   40.00
  -8  -3   7 1013.00   38.60
  -8  -3   7  992.30   41.20
  -8   3   6    9.70    3.80
  -8   3   6    4.40    7.30
  -8   3   6   15.70    5.80
  -8  -3   6   13.20    5.00
  -8  -3   6   10.90    4.90
  -8  -3   6    5.60    5.20
  -8  -3   6   15.50    4.20
  -8   3   5    6.50    5.50
  -8   3   5    6.20    7.30
  -8   3   5   11.90    3.30
  -8  -3   5    9.70    4.40
  -8  -3   5   14.20    4.80
  -8  -3   5    3.90    3.00
  -8  -3   5    9.00    5.00
  -8   3   4   35.50    9.20
  -8   3   4   28.60    6.50
  -8   3   4   27.00    3.20
  -8  -3   4   18.50    3.90
  -8  -3   4   25.30    5.70
  -8  -3   4   23.80    5.90
  -8  -3   4   26.80    4.80
  -8   3   3  648.24   33.10
  -8   3   3  612.44   27.70
  -8   3   3  615.44   25.50
  -8  -3   3  668.13   33.80
  -8  -3   3  604.64   25.30
  -8  -3   3  581.24   26.70
  -8  -3   3  568.04   24.70
  -8   3   2 1825.42   71.59
  -8   3   2 1940.41   68.39
  -8   3   2 1872.91   76.39
  -8  -3   2 1969.20   77.19
  -8  -3   2 1775.22   70.59
  -8  -3   2 1736.83   67.79
  -8  -3   2 1834.72   65.29
  -8   3   1  732.03   34.00
  -8   3   1  799.32   30.30
  -8   3   1  801.02   38.40
  -8  -3   1  867.61   39.40
  -8  -3   1  715.03   30.40
  -8  -3   1  738.83   32.90
  -8  -3   1  762.72   29.90
  -8   3   0  165.78   17.10
  -8   3   0  187.18   14.60
  -8   3   0  214.48   10.30
  -8  -3   0  220.78   19.80
   8  -3   0  198.68   11.20
  -8  -3   0  190.88   13.50
  -8  -3   0  206.58   12.40
  -8  -3   0  194.68    9.80
  -8   3  -1  178.68    9.30
  -8   3  -1  178.28   16.70
  -8   3  -1  199.88   15.50
  -8  -3  -1  176.58   12.60
   8  -3   1  194.88   10.00
  -8  -3  -1  187.58    9.20
  -8  -3  -1  188.78   18.20
  -8  -3  -1  153.18   11.50
  -8   3  -2  502.65   27.00
  -8   3  -2  506.45   27.10
  -8   3  -2  526.65   20.40
   8  -3   2  451.55   19.30
  -8  -3  -2  500.95   20.20
  -8  -3  -2  538.85   22.80
  -8  -3  -2  511.95   24.70
  -8  -3  -2  454.35   28.90
  -8   3  -3  284.47   12.40
  -8   3  -3  261.57   18.50
   8   3   3  298.57   17.60
  -8  -3  -3  283.37   17.40
  -8  -3  -3  310.27   22.70
  -8  -3  -3  280.27   15.90
  -8  -3  -3  280.77   13.10
  -8   3  -4  418.96   16.50
  -8   3  -4  386.46   22.60
   8   3   4  380.16   20.90
  -8  -3  -4  383.86   17.20
  -8  -3  -4  429.06   27.50
  -8  -3  -4  374.36   19.30
  -8  -3  -4  365.76   21.50
  -8   3  -5  295.77   13.10
  -8   3  -5  268.47   18.70
  -8  -3  -5  285.87   14.00
  -8  -3  -5  214.78   17.50
  -8  -3  -5  302.07   17.10
  -8  -3  -5  313.37   24.20
  -8   3  -6  110.49   13.40
  -8   3  -6  137.59    8.20
  -8  -3  -6  109.29    8.80
  -8  -3  -6  112.89   12.30
  -8   3  -7   26.40    8.60
  -8  -3  -7   11.80    4.90
  -8  -3  -7   16.30    7.90
  -8   3  -8 1158.78   52.39
  -8  -3  -8 1043.50   46.40
  -8  -3  -8 1213.78   46.80
  -8   3  -9   12.60    8.90
  -8  -3  -9   44.10    8.40
  -8  -3  -9   21.50   10.30
  -8   3 -10  241.28   23.70
  -8  -3 -10  238.28   17.90
  -8   3 -11   84.89   15.70
  -8  -3 -11   71.89   12.60
  -8   3 -12   10.80   11.50
  -8  -3 -12    2.30    9.10
  -8   3 -13    9.80   13.40
  -8  -3 -13    0.00   10.00
  -8   3 -14   36.40   16.90
  -8  -3 -14   29.60   13.90
  -8   3 -15   -0.20   16.00
  -8  -3 -15    8.90   13.90
  -8   4  16  333.47   22.40
  -8  -4  16  285.87   23.20
  -8   4  15   80.19   13.20
  -8  -4  15   40.30   11.80
  -8   4  14   -2.30    7.50
  -8  -4  14   11.10    9.20
  -8   4  13   71.89   11.50
  -8  -4  13   58.59   11.50
  -8   4  12   22.60    8.50
  -8  -4  12   13.50    8.20
  -8   4  11  378.06   20.70
  -8  -4  11  377.76   22.20
  -8   4  10  168.58   12.90
  -8   4  10  160.18   12.30
  -8   4  10  139.89   18.40
  -8  -4  10  162.78   11.70
  -8  -4  10  153.08   12.10
  -8  -4  10  150.98   14.40
  -8   4   9   26.40   10.30
  -8   4   9   36.10    7.50
  -8   4   9   19.10    6.30
  -8  -4   9   38.20    7.00
  -8  -4   9   14.00    4.80
  -8  -4   9   29.20    7.90
  -8   4   8  109.19    9.90
  -8   4   8  138.99   18.70
  -8   4   8  126.19   11.50
  -8  -4   8  135.09   11.20
  -8  -4   8  124.99   12.20
  -8  -4   8  115.99    9.90
  -8   4   7  150.58   19.10
  -8   4   7  171.08   12.30
  -8   4   7  151.48   10.30
  -8  -4   7  157.88   11.10
  -8  -4   7  150.38   10.80
  -8  -4   7  174.58   12.70
  -8   4   6  648.64   36.70
  -8   4   6  645.34   28.30
  -8   4   6  586.34   24.60
  -8  -4   6  656.23   29.20
  -8  -4   6  636.84   27.40
  -8  -4   6  638.14   27.40
  -8  -4   6  602.44   26.20
  -8   4   5  293.27   24.50
  -8   4   5  354.96   18.20
  -8   4   5  358.16   14.70
  -8  -4   5  331.27   16.80
  -8  -4   5  305.37   18.00
  -8  -4   5  349.96   17.30
  -8  -4   5  329.77   16.50
  -8   4   4  183.18   20.80
  -8   4   4  191.88    9.00
  -8   4   4  190.68   13.00
  -8  -4   4  183.98   11.80
  -8  -4   4  172.18   12.50
  -8  -4   4  170.28   10.50
  -8  -4   4  195.78   12.10
  -8   4   3  161.68   12.30
  -8   4   3  138.49   17.60
  -8  -4   3  142.09   10.80
  -8  -4   3  157.28   10.90
  -8  -4   3  145.29    9.10
  -8   4   2  137.29   17.80
  -8   4   2  137.39   12.90
  -8  -4   2  176.38    9.50
  -8  -4   2  135.69   10.80
  -8  -4   2  167.48   11.30
  -8   4   1  390.16   21.40
  -8   4   1  372.76   26.80
  -8   4   1  389.26   17.70
  -8  -4   1  404.06   19.90
  -8  -4   1  389.56   17.30
  -8  -4   1  374.56   18.60
  -8   4   0  229.18   22.30
  -8   4   0  266.37   17.50
  -8   4   0  246.78   12.20
   8  -4   0  231.48   13.80
  -8  -4   0  217.38   13.40
  -8  -4   0  211.28   11.40
  -8  -4   0  221.38   14.40
  -8  -4   0  254.57   23.50
  -8   4  -1  615.54   31.10
  -8   4  -1  608.94   34.90
  -8   4  -1  641.14   25.50
   8  -4   1  618.74   25.70
  -8  -4  -1  598.34   25.10
  -8  -4  -1  647.24   36.20
  -8  -4  -1  632.04   26.60
  -8  -4  -1  588.74   27.90
  -8   4  -2  630.94   36.70
  -8   4  -2  745.43   28.30
   8  -4   2  705.33   28.10
  -8  -4  -2  771.82   40.90
  -8  -4  -2  691.33   28.60
  -8  -4  -2  697.63   29.60
  -8  -4  -2  740.93   32.00
  -8  -4  -2  688.03   28.30
   8   4   3   62.99   10.70
  -8   4  -3   71.59    6.00
  -8   4  -3   58.69   11.60
  -8  -4  -3   51.59    5.70
  -8  -4  -3   63.09    8.40
  -8  -4  -3   49.70    8.50
  -8   4  -4  721.93   38.10
  -8   4  -4  768.52   29.50
   8   4   4  755.32   34.40
  -8  -4  -4  708.53   30.10
  -8  -4  -4  742.23   30.90
  -8  -4  -4  722.33   33.70
   8   4   5  104.99   13.30
  -8   4  -5  107.29   14.80
  -8  -4  -5   80.89   11.40
  -8  -4  -5  114.59    8.70
  -8  -4  -5  132.19   12.00
  -8   4  -6  566.04   32.80
  -8  -4  -6  592.24   26.70
  -8  -4  -6  559.94   25.50
  -8   4  -7  196.68   20.70
  -8  -4  -7  227.98   15.80
  -8  -4  -7  208.48   13.70
  -8   4  -8   37.20   11.50
  -8  -4  -8   24.00    8.80
  -8  -4  -8   39.70    7.50
  -8   4  -9    7.70   10.30
  -8  -4  -9    7.50    9.40
  -8  -4  -9    8.30    6.40
  -8   4 -10    0.20   10.70
  -8  -4 -10  -12.50    5.60
  -8   4 -11   35.90   14.10
  -8  -4 -11   34.40   10.10
  -8   4 -12  709.63   45.90
  -8  -4 -12  731.93   39.60
  -8   4 -13    1.50   13.70
  -8  -4 -13   10.70   11.00
  -8   4 -14  136.39   24.80
  -8  -4 -14   88.49   17.90
  -8   4 -15  -14.30   16.80
  -8  -4 -15    7.60   13.80
  -8   5  16    2.40   10.80
  -8  -5  16   -9.90   11.50
  -8   5  15   82.39   13.80
  -8  -5  15  101.39   15.70
  -8   5  14   63.29   12.20
  -8  -5  14   58.99   12.90
  -8   5  13   53.09   11.10
  -8  -5  13   39.70   11.50
  -8   5  12  162.98   15.00
  -8  -5  12  184.48   17.60
  -8   5  11   26.00    8.20
  -8  -5  11   22.10    8.90
  -8  -5  11   24.10    7.90
  -8   5  10   71.89    9.80
  -8   5  10   61.99   15.20
  -8  -5  10   62.19    9.40
  -8  -5  10   61.99   11.00
  -8   5   9   54.79   15.00
  -8   5   9   50.49    8.50
  -8  -5   9   47.50    9.70
  -8  -5   9   46.90    7.40
  -8  -5   9   57.99    8.50
  -8   5   8   53.49   13.60
  -8   5   8   52.59    7.80
  -8  -5   8   43.20    6.80
  -8  -5   8   42.70    7.50
  -8  -5   8   41.10    8.50
  -8   5   7  133.09   10.30
  -8   5   7  138.09   11.50
  -8   5   7  124.99   19.20
  -8  -5   7  147.29   13.40
  -8  -5   7  156.58   10.90
  -8  -5   7  147.99   12.30
  -8   5   6   51.49    6.50
  -8   5   6   54.59    8.10
  -8   5   6   41.90   13.00
  -8  -5   6   63.09    9.00
  -8  -5   6   30.30    7.40
  -8  -5   6   33.50    6.90
  -8  -5   6   32.50    5.80
  -8   5   5  177.38   21.90
  -8   5   5  178.88   13.00
  -8   5   5  180.68   10.30
  -8  -5   5  169.88   13.10
  -8  -5   5  193.78   13.50
  -8  -5   5  187.48   12.50
  -8  -5   5  168.68   11.10
  -8   5   4    6.80    3.60
  -8   5   4    2.00    9.50
  -8   5   4    7.70    6.10
  -8  -5   4    1.50    4.80
  -8  -5   4    3.00    3.20
  -8  -5   4    7.30    5.60
  -8  -5   4   -2.00    4.70
  -8   5   3  312.57   19.00
  -8   5   3  390.66   29.00
  -8   5   3  349.87   14.00
  -8  -5   3  334.07   18.10
  -8  -5   3  356.06   17.90
  -8  -5   3  349.07   16.80
  -8   5   2  196.38   23.70
  -8   5   2  166.98   14.90
  -8  -5   2  259.87   14.90
  -8  -5   2  261.17   13.10
  -8  -5   2  277.47   14.90
  -8   5   1   66.29   10.30
  -8   5   1   63.99   14.80
  -8  -5   1   50.79    7.70
  -8  -5   1   42.90    6.90
  -8  -5   1   55.39    6.00
  -8   5   0  772.12   44.80
  -8   5   0  793.82   37.60
   8  -5   0  813.02   34.40
  -8  -5   0  838.02   32.80
  -8  -5   0  800.12   33.20
  -8  -5   0  818.22   35.10
  -8   5  -1  235.78   25.00
  -8  -5  -1  239.78   14.90
  -8  -5  -1  272.67   13.40
   8  -5   1  241.08   15.30
  -8  -5  -1  254.77   15.40
   8   5   2  139.99   16.50
  -8   5  -2  142.99   19.40
  -8  -5  -2  182.68   13.00
  -8  -5  -2  142.69    9.80
   8  -5   2  143.39   11.40
  -8  -5  -2  162.28   12.00
  -8   5  -3  636.04   39.50
   8   5   3  706.73   34.90
  -8  -5  -3  706.73   31.30
  -8  -5  -3  701.03   29.30
  -8  -5  -3  693.43   29.80
  -8   5  -4   25.90   10.80
   8   5   4   16.20    8.90
  -8  -5  -4    8.00    5.90
  -8  -5  -4   15.00    7.20
  -8  -5  -4   12.10    4.30
   8   5   5   27.10   10.60
  -8   5  -5   21.90   11.00
  -8  -5  -5   29.00    8.60
  -8  -5  -5   32.20    5.90
  -8  -5  -5   46.00    8.30
   8   5   6   28.90   10.30
  -8   5  -6    6.40   10.30
  -8  -5  -6   14.30    5.10
  -8  -5  -6   15.90    7.40
  -8   5  -7   55.39   14.60
  -8  -5  -7   65.69    8.60
  -8  -5  -7   69.69   10.40
  -8   5  -8  904.41   49.90
  -8  -5  -8  959.40   39.20
  -8  -5  -8  857.41   39.90
  -8   5  -9  298.57   29.60
  -8  -5  -9  306.37   20.10
  -8   5 -10  287.47   29.70
  -8  -5 -10  196.08   18.40
  -8   5 -11  131.69   23.10
  -8  -5 -11  129.99   16.40
  -8   5 -12    5.20   14.80
  -8  -5 -12    2.60    9.40
  -8   5 -13  166.18   27.60
  -8  -5 -13  118.79   18.30
  -8   5 -14   -0.60   17.50
  -8  -5 -14   13.10   13.00
  -8   6  15  160.98   17.50
  -8  -6  15  139.79   18.80
  -8   6  14   52.29   12.20
  -8  -6  14   30.50   12.80
  -8   6  13    7.20    9.50
  -8  -6  13   -3.70    9.60
  -8   6  12   -8.40    7.80
  -8  -6  12    4.50    9.20
  -8   6  11  287.97   19.00
  -8  -6  11  311.87   18.70
  -8  -6  11  317.87   21.70
  -8   6  10   87.19   11.20
  -8  -6  10   67.69   12.00
  -8  -6  10   92.59   11.10
  -8   6   9   65.19    9.40
  -8   6   9   40.00   15.70
  -8  -6   9   77.19   10.10
  -8  -6   9   63.19   11.40
  -8   6   8   34.60    7.60
  -8   6   8   18.70   13.30
  -8  -6   8   21.60    7.40
  -8  -6   8   37.50    6.80
  -8  -6   8   41.40    9.10
  -8   6   7   12.40    5.90
  -8   6   7   -3.10   10.10
  -8  -6   7    6.70    5.70
  -8  -6   7    9.60    4.40
  -8  -6   7    5.60    7.00
  -8   6   6  259.17   13.90
  -8   6   6  238.38   27.20
  -8  -6   6  233.48   14.10
  -8  -6   6  235.28   15.10
  -8  -6   6  217.48   15.70
  -8  -6   6  206.88   16.00
  -8   6   5  164.58   22.80
  -8   6   5  153.98   10.30
  -8  -6   5  145.79   12.60
  -8  -6   5  158.18   11.10
  -8  -6   5  155.58   14.00
  -8  -6   5  148.29   12.40
  -8   6   4  178.88   10.50
  -8   6   4  228.68   26.20
  -8   6   4  236.58   14.80
  -8  -6   4  172.28   12.60
  -8  -6   4  141.39   13.60
  -8  -6   4  173.28   11.70
  -8  -6   4  187.78   13.30
  -8   6   3   35.10    8.50
  -8   6   3   24.40    4.60
  -8   6   3   24.20   13.10
  -8  -6   3   27.70    6.90
  -8  -6   3   33.70    6.70
  -8  -6   3   30.20    5.40
  -8   6   2   63.89   16.60
  -8  -6   2   43.80    7.80
  -8  -6   2   31.00    6.80
  -8  -6   2   38.70    5.60
  -8   6   1  569.74   40.60
  -8  -6   1  621.34   28.50
  -8  -6   1  642.74   27.90
  -8  -6   1  657.13   27.50
  -8   6   0    7.00   11.70
  -8  -6   0    5.70    3.40
   8  -6   0    3.10    6.70
  -8  -6   0    7.80    5.70
  -8  -6   0   13.10    5.90
  -8   6  -1  112.69   20.00
   8   6   1  115.39   16.90
  -8  -6  -1  125.79    9.70
  -8  -6  -1  144.99   11.20
  -8  -6  -1  120.99   12.00
   8  -6   1  129.99   13.40
   8   6   2  214.58   21.20
  -8   6  -2  208.68   26.00
  -8  -6  -2  220.08   13.10
  -8  -6  -2  213.08   14.50
   8  -6   2  223.98   15.60
  -8  -6  -2  211.48   14.60
  -8   6  -3  135.99   21.80
   8   6   3  141.99   17.90
  -8  -6  -3  108.39    9.90
  -8  -6  -3  115.39   11.70
  -8  -6  -3  129.39   12.10
   8  -6   3  116.09   11.90
  -8   6  -4  449.66   34.30
   8   6   4  402.66   27.40
  -8  -6  -4  451.65   22.50
  -8  -6  -4  436.06   21.50
   8   6   5  589.54   32.80
  -8   6  -5  560.34   38.40
  -8  -6  -5  539.65   26.20
  -8  -6  -5  537.95   25.80
  -8   6  -6  106.69   19.90
   8   6   6   90.29   15.50
  -8  -6  -6   89.09    9.80
  -8  -6  -6   80.69   11.10
  -8   6  -7  979.10   54.09
  -8  -6  -7  898.61   40.60
  -8  -6  -7  940.31   39.10
  -8   6  -8   12.80   13.00
  -8  -6  -8   16.30    7.00
  -8  -6  -8   24.90    9.40
  -8   6  -9   28.50   15.00
  -8  -6  -9   -0.90    6.60
  -8   6 -10    7.90   13.70
  -8  -6 -10   -1.20    7.70
  -8   6 -11  381.86   39.10
  -8  -6 -11  374.86   26.20
  -8   6 -12  151.08   27.50
  -8  -6 -12  212.28   22.40
  -8   6 -13  290.57   37.30
  -8  -6 -13  264.47   26.70
  -8   7  14   46.90   12.30
  -8  -7  14   31.10   13.80
  -8   7  13  212.88   18.50
  -8  -7  13  179.08   20.40
  -8   7  12   42.20   10.80
  -8  -7  12   31.60   11.80
  -8   7  11   11.60    8.90
  -8  -7  11   31.10    9.10
  -8  -7  11   42.40   11.40
  -8   7  10  164.28   15.00
  -8  -7  10  139.29   13.80
  -8  -7  10  136.69   16.60
  -8   7   9  167.08   14.50
  -8  -7   9  170.68   15.00
  -8  -7   9  154.98   17.30
  -8   7   8    3.10    6.80
  -8   7   8    1.30   12.70
  -8  -7   8   -2.20    7.70
  -8  -7   8    6.80    6.80
  -8   7   7  206.38   14.10
  -8   7   7  171.78   25.70
  -8  -7   7  202.88   15.20
  -8  -7   7  223.88   17.80
  -8   7   6   56.29    8.20
  -8   7   6   46.10   16.30
  -8  -7   6   52.49    9.00
  -8  -7   6   41.30    8.60
  -8  -7   6   57.69    7.90
  -8  -7   6   49.00   10.40
  -8   7   5   36.70    7.00
  -8   7   5   63.39   17.50
  -8  -7   5   31.30    7.80
  -8  -7   5   46.70    9.60
  -8  -7   5   47.60    7.10
  -8  -7   5   47.70    8.60
  -8   7   4    6.40    4.80
  -8   7   4   17.10   13.90
  -8  -7   4    3.80    3.70
  -8  -7   4   -0.80    5.50
  -8  -7   4    3.60    6.30
  -8  -7   4    7.40    5.60
  -8   7   3   86.09   19.70
  -8   7   3   85.59    7.60
  -8  -7   3   78.09    9.60
  -8  -7   3   63.19    9.40
  -8  -7   3  110.39    9.90
  -8   7   2  673.83   45.90
  -8  -7   2  684.53   30.50
  -8  -7   2  646.84   29.30
  -8  -7   2  670.93   29.60
   8   7  -1   19.30   12.10
  -8   7   1   52.99   17.00
  -8  -7   1   14.90    6.60
  -8  -7   1   18.00    6.70
  -8  -7   1   22.30    5.70
  -8  -7   1   27.20    5.50
   8   7   0   13.70   11.10
  -8   7   0    1.60   12.80
  -8  -7   0    0.50    5.80
  -8  -7   0   10.50    4.60
  -8  -7   0    4.00    3.60
  -8  -7   0    2.80    5.80
  -8   7  -1   74.99   19.00
   8   7   1   51.69   14.50
   8  -7   1   44.90   10.30
  -8  -7  -1   79.89    8.70
  -8  -7  -1   36.40    8.70
   8   7   2   37.50   13.00
  -8   7  -2    3.00   13.30
  -8  -7  -2   32.00    8.20
   8  -7   2   24.70    8.60
  -8  -7  -2   20.50    5.60
  -8   7  -3 1261.77   69.49
   8   7   3 1262.47   59.39
  -8  -7  -3 1341.27   51.39
  -8  -7  -3 1286.17   52.99
   8  -7   3 1389.16   54.19
  -8   7  -4    5.40   13.20
   8   7   4   -1.80   10.50
  -8  -7  -4    6.50    7.00
  -8  -7  -4    1.50    4.50
  -8   7  -5   67.59   18.90
   8   7   5   42.00   13.60
  -8  -7  -5   73.69   10.90
  -8  -7  -5   52.29    8.10
  -8   7  -6  269.87   32.40
   8   7   6  274.67   25.80
  -8  -7  -6  276.77   17.70
  -8  -7  -6  281.17   18.30
   8   7   7  270.07   25.70
  -8   7  -7  260.67   32.90
  -8  -7  -7  293.97   18.70
  -8  -7  -7  285.27   18.70
  -8   7  -8    8.50   16.10
  -8  -7  -8    5.50    6.50
  -8   7  -9  421.66   42.40
  -8  -7  -9  429.96   26.30
  -8   7 -10   -1.90   15.20
  -8  -7 -10   -7.10    7.70
  -8   7 -11  271.27   36.00
  -8  -7 -11  221.98   22.30
  -8   7 -12   -0.60   18.50
  -8  -7 -12    9.20   11.40
  -8  -7 -13   -3.90   11.80
  -8   8  13   20.10   11.10
  -8  -8  13   21.80   13.40
  -8   8  12    9.10    9.80
  -8  -8  12   12.00   12.20
  -8   8  11  231.98   18.30
  -8  -8  11  239.28   23.10
  -8  -8  11  258.17   18.60
  -8   8  10   29.50    9.70
  -8  -8  10   51.59   10.70
  -8  -8  10   41.00   12.60
  -8   8   9   22.40    8.90
  -8  -8   9   26.70   11.10
  -8  -8   9    3.90    8.00
  -8   8   8   15.30    8.40
  -8  -8   8   -1.70    9.40
  -8  -8   8    5.40    7.60
  -8   8   7   53.69    9.30
  -8  -8   7   52.79    9.70
  -8  -8   7   63.09   10.70
  -8  -8   7   69.69   12.80
  -8   8   6  501.85   40.50
  -8   8   6  451.55   22.30
  -8  -8   6  480.55   27.20
  -8  -8   6  467.25   24.70
  -8  -8   6  433.06   23.60
  -8   8   5  239.28   32.00
  -8   8   5  269.97   15.40
  -8  -8   5  251.17   16.80
  -8  -8   5  280.87   19.70
  -8  -8   5  249.08   16.00
  -8  -8   5  233.38   16.80
  -8   8   4   18.20   15.20
  -8   8   4   11.10    6.10
  -8  -8   4   16.30    6.80
  -8  -8   4   15.00    7.00
  -8  -8   4   20.90    5.70
  -8   8   3   26.60   18.20
   8   8  -3   18.20   14.10
  -8  -8   3   41.90    8.40
  -8  -8   3   40.10    7.10
  -8  -8   3   12.00    6.90
   8   8  -2   37.40   14.90
  -8   8   2   50.19   18.70
  -8  -8   2   32.30    6.50
  -8  -8   2   32.60    6.80
  -8  -8   2   45.00    8.70
  -8   8   1  505.55   43.20
   8   8  -1  604.04   36.70
  -8  -8   1  545.35   27.00
  -8  -8   1  573.34   27.20
   8   8   0    4.50   12.80
  -8   8   0   -2.80   15.90
  -8  -8   0    7.50    4.80
  -8  -8   0    5.20    6.30
  -8   8  -1  160.18   28.30
   8   8   1  199.88   23.70
  -8  -8  -1  175.08   13.20
   8  -8   1  198.68   19.20
  -8  -8  -1  173.58   15.40
  -8   8  -2  415.26   42.30
   8   8   2  423.26   30.50
  -8  -8  -2  398.56   21.60
  -8  -8  -2  386.46   21.90
   8  -8   2  416.26   25.50
   8   8   3    7.50   12.00
  -8   8  -3   -7.50   15.50
   8  -8   3    8.90    8.70
  -8  -8  -3    1.20    6.90
  -8  -8  -3    0.10    4.90
  -8   8  -4   38.40   19.50
   8   8   4   59.09   16.10
  -8  -8  -4   41.00    9.50
  -8  -8  -4   44.00    8.20
   8   8   5  123.09   20.90
  -8   8  -5  129.89   26.00
  -8  -8  -5  129.99   12.80
  -8  -8  -5   89.09   12.50
   8   8   6   71.29   17.50
  -8   8  -6   68.09   21.80
  -8  -8  -6   81.29   10.90
  -8  -8  -6   84.89   12.10
  -8   8  -7  429.16   44.10
   8   8   7  425.46   32.10
  -8  -8  -7  423.26   23.80
  -8  -8  -7  404.46   24.20
   8   8   8   15.50   14.40
  -8   8  -8   -4.30   16.00
  -8  -8  -8    0.00    7.00
  -8   8  -9    9.90   18.50
  -8  -8  -9   -2.90    7.90
  -8   8 -10   90.69   26.80
  -8  -8 -10  109.99   15.80
  -8   8 -11  142.69   30.80
  -8  -8 -11  117.99   17.50
  -8   9  12    6.30   11.40
  -8   9  11  -20.90    9.40
  -8  -9  11   -1.20   11.30
  -8  -9  11    6.30    9.60
  -8   9  10  173.18   16.30
  -8  -9  10  168.48   17.40
  -8  -9  10  143.19   19.60
  -8   9   9  279.47   19.50
  -8  -9   9  333.07   25.00
  -8  -9   9  314.17   21.00
  -8   9   8    1.00    8.30
  -8  -9   8    2.30    8.30
  -8  -9   8   11.60   10.00
  -8  -9   8    9.10    8.10
  -8   9   7  451.95   23.90
   8   9  -7  420.66   40.20
  -8  -9   7  462.85   29.10
  -8  -9   7  490.45   26.70
  -8  -9   7  519.05   26.30
  -8   9   6    0.70    7.10
   8   9  -6   30.40   17.40
  -8  -9   6    7.00    7.00
  -8  -9   6    3.20    9.50
  -8  -9   6    2.80    7.50
   8   9  -5   56.99   19.00
  -8   9   5   50.79   20.60
  -8  -9   5   56.89   10.50
  -8   9   4   62.99   21.60
   8   9  -4   35.30   16.80
  -8  -9   4   55.69   10.70
  -8   9   3  256.57   35.30
   8   9  -3  324.87   32.10
  -8  -9   3  247.58   17.40
   8   9  -2   61.29   18.90
  -8   9   2   93.19   24.90
  -8  -9   2   70.49    9.90
  -8  -9   2   86.29   11.70
  -8   9   1  250.77   35.30
   8   9  -1  242.18   28.20
  -8  -9   1  199.58   15.70
  -8  -9   1  250.67   16.50
  -8   9   0   -9.70   16.20
   8   9   0  -12.70   13.10
  -8  -9   0    4.60    7.50
  -8  -9   0    2.00    5.10
  -8   9  -1  -14.10   16.60
   8   9   1   23.90   15.20
  -8  -9  -1   -2.10    6.80
  -8  -9  -1   -4.30    4.90
  -8   9  -2  105.79   26.10
   8   9   2  111.49   20.90
   8  -9   2  107.99   16.40
  -8  -9  -2  107.89   13.70
  -8  -9  -2  134.79   13.40
  -8   9  -3  496.95   49.10
   8   9   3  427.96   33.10
  -8  -9  -3  440.26   24.30
   8  -9   3  414.36   27.70
  -8  -9  -3  452.75   24.50
  -8   9  -4    5.60   19.70
   8   9   4   40.70   15.80
  -8  -9  -4   36.40    8.10
  -8  -9  -4   45.50   10.20
  -8   9  -5   83.39   25.20
   8   9   5   85.39   19.30
  -8  -9  -5   77.09   12.30
  -8  -9  -5   60.89   10.80
  -8   9  -6   67.19   25.30
   8   9   6   53.59   17.70
  -8  -9  -6   49.99   10.20
  -8  -9  -6   56.39   11.90
  -8   9  -7   -5.50   18.80
   8   9   7  -15.50   14.50
  -8  -9  -7    1.10    7.20
  -8   9  -8    4.20   19.00
   8   9   8    1.30   15.40
  -8  -9  -8   -4.60    7.80
  -8   9  -9   68.09   26.40
  -8  -9  -9   66.29   13.40
  -8   9 -10   70.09   27.10
  -8  -9 -10   63.69   14.30
  -8 -10  10   18.10   10.80
  -8 -10  10   -1.90   12.50
   8  10  -9   18.00   20.10
  -8 -10   9   10.40   12.40
  -8 -10   9    2.70    9.60
   8  10  -8    2.50   18.50
  -8 -10   8    3.20   11.30
  -8 -10   8   -2.20    9.20
   8  10  -7  119.09   24.70
  -8 -10   7   41.00   13.40
  -8 -10   7  107.09   14.00
   8  10  -6   20.30   18.80
  -8 -10   6    9.40    9.10
   8  10  -5  450.35   41.60
  -8 -10   5  480.55   26.70
   8  10  -4   71.29   21.40
  -8 -10   4   62.69   11.50
   8  10  -3  362.76   36.10
  -8 -10   3  360.06   22.00
  -8  10   2    6.60   20.70
   8  10  -2   24.10   17.10
  -8 -10   2   35.00    9.50
  -8  10   1   66.89   25.80
   8  10  -1  100.89   22.50
  -8 -10   1  104.09   13.50
   8  10   0   69.79   18.90
  -8  10   0   38.00   22.80
  -8 -10   0   57.69   11.40
   8  10   1  328.77   33.00
  -8  10  -1  355.26   45.30
  -8 -10  -1  294.77   20.50
   8  10   2   46.00   17.60
  -8  10  -2   45.50   24.00
  -8 -10  -2   37.80   10.70
  -8  10  -3  100.49   28.10
   8  10   3  116.59   22.10
  -8 -10  -3   88.49   12.00
  -8 -10  -3   99.29   13.90
   8 -10   3   81.79   15.90
   8  10   4   -0.20   15.40
  -8  10  -4   -1.90   20.80
  -8 -10  -4   -5.10    8.80
  -8 -10  -4    1.20    6.90
  -8  10  -5   20.40   22.50
   8  10   5   27.80   17.90
  -8 -10  -5   24.60   10.90
  -8 -10  -5   31.20    9.20
  -8  10  -6   99.39   30.60
   8  10   6   95.79   20.70
  -8 -10  -6   74.59   13.60
  -8 -10  -6   71.89   12.40
  -8  10  -7  337.07   46.40
   8  10   7  270.27   30.00
  -8  10  -8   -1.90   23.50
   8  10   8   38.10   20.10
   8  11  -6   -2.30   19.00
  -8 -11   6   11.30    9.70
   8  11  -5   39.60   21.60
  -8 -11   5   33.70   10.90
   8  11  -4   11.20   17.60
  -8 -11   4    9.00    9.20
   8  11  -3  231.58   30.00
  -8 -11   3  203.58   19.20
   8  11  -2   -0.10   17.40
  -8 -11   2    7.00    8.10
   8  11  -1  242.98   31.60
  -8 -11   1  213.28   19.60
   8  11   0   76.89   21.30
  -8 -11   0   73.99   12.90
   8  11   1   84.39   22.20
  -8 -11  -1   34.30   11.30
  -8  11  -2   34.40   26.80
   8  11   2   45.20   19.40
  -8 -11  -2   25.80   10.90
  -8  11  -3  214.58   40.70
   8  11   3  211.88   29.40
  -8 -11  -3  238.58   21.20
  -8  11  -4   47.20   29.20
   8  11   4   59.49   20.80
  -8 -11  -4   81.89   14.40
  -8  11  -5   33.90   28.30
   8  11   5   87.89   21.70
  -8 -11  -5  109.29   15.90
  -9   0  18  222.88   22.20
  -9   0  17   16.70   11.10
  -9   0  17   -1.10   10.00
  -9   0  16    3.90    9.20
  -9   0  15   -8.90    7.90
  -9   0  14  337.37   21.20
  -9   0  13    1.50    7.00
  -9   0  12   68.39   10.00
  -9   0  12   62.19   10.40
  -9   0  11    1.50    6.40
  -9   0  11    3.50    5.90
  -9   0  11   -3.60    5.30
  -9   0  10   38.60    8.90
  -9   0  10   54.79    9.10
  -9   0  10   50.29    8.00
  -9   0   9    4.00    5.00
  -9   0   9    5.30    4.90
  -9   0   9    5.80    6.10
  -9   0   9   -1.80    6.00
  -9   0   8  124.09   11.40
  -9   0   8  106.19   11.30
  -9   0   8  121.29   11.60
  -9   0   8  104.69    8.90
  -9   0   7    1.90    4.90
  -9   0   7    7.60    4.80
  -9   0   7   -0.50    3.60
  -9   0   7   -4.60    5.60
  -9   0   6   75.29    8.90
  -9   0   6   73.89    6.20
  -9   0   6   85.59    9.60
  -9   0   6   64.39    8.30
  -9   0   5   -1.00    2.20
  -9   0   5   -0.80    3.70
  -9   0   5    6.40    4.80
  -9   0   5   -6.50    5.10
  -9   0   4 1580.34   66.29
  -9   0   4 1744.63   62.29
  -9   0   4 1695.83   65.49
  -9   0   4 1837.12   67.29
  -9   0   3   -1.70    5.80
  -9   0   3   -1.10    3.60
  -9   0   3   -0.30    3.10
  -9   0   3   -0.30    5.10
  -9   0   2  381.96   17.70
  -9   0   2  389.76   19.90
  -9   0   2  370.76   20.20
  -9   0   2  412.36   19.30
  -9   0   1   -0.90    5.30
  -9   0   1    2.40    3.30
  -9   0   1    0.80    5.60
  -9   0   1    0.90    2.80
  -9   0   0   -0.30    5.90
  -9   0   0    7.50    2.70
  -9   0   0    5.70    3.30
  -9   0   0   14.70    6.20
  -9   0  -1   -6.00    5.30
  -9   0  -1    8.20    6.30
  -9   0  -2  685.73   32.40
  -9   0  -2  654.93   30.40
  -9   0  -3    1.80    6.70
  -9   0  -3    8.80    7.90
  -9   0  -4 3265.57  115.39
  -9   0  -5   -5.00    8.80
  -9   0  -5    1.30    3.20
  -9   0  -5    0.40    2.60
  -9   0  -6  270.67   14.40
  -9   0  -6  251.77   13.40
  -9   0  -7   -2.00    4.10
  -9   0  -7    0.30    4.60
  -9   0  -8  433.56   22.40
  -9   0  -9    2.50    5.80
  -9   0 -10  451.85   26.10
  -9   0 -11    4.20    7.60
  -9   0 -12  414.96   28.20
  -9   0 -13   16.10   11.00
  -9   0 -14  154.78   21.50
  -9   0 -15   -5.00   13.50
  -9   1  17    2.10   10.70
  -9  -1  17   13.00   10.80
  -9   1  16   26.60   10.70
  -9   1  16   22.10   10.60
  -9  -1  16   37.60   11.50
  -9   1  15    7.40    9.10
  -9   1  15   -6.20    7.70
  -9  -1  15   -2.40    8.50
  -9   1  14  110.69   13.70
  -9   1  14   87.69   12.40
  -9  -1  14   87.69   12.50
  -9   1  13    7.80    7.80
  -9   1  13   11.10    7.70
  -9  -1  13    9.60    7.50
  -9   1  12  181.68   13.80
  -9   1  12  183.08   15.30
  -9  -1  12  204.58   15.20
  -9   1  11    3.70    6.50
  -9   1  11    5.80    6.00
  -9   1  11   -0.70    6.30
  -9  -1  11    0.70    6.00
  -9  -1  11    2.50    5.20
  -9   1  10  465.95   23.90
  -9   1  10  469.35   26.60
  -9   1  10  446.86   21.80
  -9  -1  10  461.95   24.70
  -9  -1  10  496.85   24.80
  -9  -1  10  499.35   22.70
  -9   1   9   34.70    6.20
  -9   1   9   24.00    7.50
  -9   1   9   31.90    7.50
  -9  -1   9   44.00    7.60
  -9  -1   9   40.90    7.50
  -9  -1   9   26.40    6.50
  -9  -1   9   31.40    8.00
  -9   1   8  477.85   20.20
  -9   1   8  440.46   24.80
  -9   1   8  482.15   23.10
  -9  -1   8  479.85   23.50
  -9  -1   8  420.46   20.90
  -9  -1   8  438.96   22.80
  -9  -1   8  445.46   20.50
  -9   1   7  107.09   10.60
  -9   1   7   75.29   10.50
  -9   1   7  101.39    7.70
  -9  -1   7  102.19    9.90
  -9  -1   7   92.99    8.30
  -9  -1   7  107.09   10.30
  -9  -1   7  110.79   11.00
  -9   1   6  268.67   15.90
  -9   1   6  229.78   14.40
  -9   1   6  222.18   15.50
  -9   1   6  211.48   10.70
  -9  -1   6  249.18   14.20
  -9  -1   6  220.78   11.40
  -9  -1   6  225.38   13.60
  -9  -1   6  229.48   14.30
  -9   1   5   24.40    6.40
  -9   1   5   28.10    8.00
  -9   1   5   18.70    6.10
  -9  -1   5   27.20    5.10
  -9  -1   5   16.40    5.70
  -9  -1   5   19.60    3.60
  -9  -1   5   27.70    6.40
  -9   1   4  168.28   11.80
  -9   1   4  136.59   12.60
  -9   1   4  166.68   14.10
  -9   1   4  151.08   12.30
  -9  -1   4  152.18   11.60
  -9  -1   4  186.38   14.30
  -9  -1   4  146.39    9.90
  -9  -1   4  153.98   11.40
  -9   1   3   -2.90    3.10
  -9   1   3    7.50    7.10
  -9   1   3    0.80    4.20
  -9   1   3   -1.60    5.10
  -9  -1   3   13.70    5.30
  -9  -1   3    3.90    4.80
  -9  -1   3    1.10    2.60
  -9  -1   3   -4.40    4.70
  -9   1   2   80.79    8.40
  -9   1   2   73.69    6.90
  -9   1   2   62.19    9.00
  -9   1   2   83.09   10.60
  -9  -1   2   69.69    8.80
  -9  -1   2   57.89    5.50
  -9  -1   2   54.19    8.40
  -9  -1   2   71.19    8.90
  -9   1   1  148.49    9.30
  -9   1   1  165.68   11.20
  -9   1   1  137.79   13.10
  -9   1   1  160.28   14.30
  -9  -1   1  143.29   12.60
  -9  -1   1  164.78   12.70
  -9  -1   1  163.98   12.20
  -9  -1   1  160.58    8.30
  -9   1   0 4688.23  175.68
  -9   1   0 4731.33  170.98
  -9   1   0 5079.69  169.28
  -9  -1   0 4516.05  168.48
  -9  -1   0 4906.61  172.68
  -9  -1   0 4666.13  174.88
  -9  -1   0 4678.73  160.48
  -9   1  -1  266.67   18.20
  -9  -1  -1  277.87   11.80
  -9  -1  -1  307.27   17.10
  -9  -1  -1  321.57   18.80
  -9  -1  -1  334.97   16.70
  -9   1  -2  114.69   13.40
  -9  -1  -2  107.19   11.20
  -9  -1  -2  103.19    5.10
  -9  -1  -2  114.69   12.70
  -9   1  -3   33.10    9.30
  -9  -1  -3   35.20    8.20
  -9  -1  -3   31.30    6.50
  -9  -1  -3   45.00    9.50
  -9   1  -4  143.19   16.30
  -9  -1  -4  149.29   14.10
  -9  -1  -4  145.19    7.30
  -9  -1  -4  150.98   15.80
  -9  -1  -4  140.39   11.80
  -9   1  -5  391.96   15.20
  -9   1  -5  373.46   17.20
  -9  -1  -5  340.87   23.20
  -9  -1  -5  342.97   15.70
  -9  -1  -5  370.16   21.50
  -9  -1  -5  385.26   20.00
  -9   1  -6  713.43   26.90
  -9   1  -6  645.94   28.80
  -9  -1  -6  639.44   32.20
  -9  -1  -6  646.74   27.30
  -9  -1  -6  680.13   31.20
  -9   1  -7  266.07   16.80
  -9   1  -7  291.77   15.10
  -9  -1  -7  314.17   15.90
  -9  -1  -7  309.67   19.80
  -9   1  -8 1458.05   59.89
  -9  -1  -8 1476.85   58.09
  -9   1  -9   19.70    7.50
  -9  -1  -9   14.30    6.50
  -9   1 -10  184.38   18.20
  -9  -1 -10  211.88   16.60
  -9   1 -11   20.90    9.70
  -9  -1 -11   15.20    8.70
  -9   1 -12  471.65   31.00
  -9  -1 -12  439.56   29.00
  -9   1 -13  141.79   20.00
  -9  -1 -13  120.09   17.30
  -9   1 -14   35.90   15.70
  -9  -1 -14   52.69   15.00
  -9   1 -15   48.90   17.70
  -9  -1 -15   46.10   16.40
  -9   2  17   16.40   11.50
  -9  -2  17    4.00   11.40
  -9   2  16   62.59   12.90
  -9  -2  16   45.80   12.00
  -9   2  15   14.80    9.20
  -9  -2  15   21.30   10.30
  -9   2  14  620.94   30.30
  -9   2  14  637.54   31.50
  -9  -2  14  616.44   31.50
  -9   2  13   -8.90    7.00
  -9   2  13    4.80    7.80
  -9  -2  13    2.70    7.90
  -9   2  12    7.70    7.20
  -9   2  12   11.80    7.20
  -9  -2  12   12.20    7.80
  -9   2  11    7.40    7.80
  -9   2  11   11.30    6.80
  -9   2  11    0.90    5.80
  -9  -2  11    6.30    6.30
  -9  -2  11    5.10    5.10
  -9   2  10    0.20    6.50
  -9   2  10    7.10    5.70
  -9   2  10    0.70    6.00
  -9  -2  10   11.30    5.20
  -9  -2  10    9.30    6.20
  -9  -2  10    5.40    5.90
  -9   2   9   15.30    7.80
  -9   2   9   15.80    6.60
  -9   2   9   11.70    5.10
  -9  -2   9   15.10    5.90
  -9  -2   9    9.20    5.50
  -9  -2   9   12.50    4.90
  -9   2   8  721.53   37.50
  -9   2   8  775.52   30.30
  -9   2   8  765.32   33.80
  -9  -2   8  793.42   31.40
  -9  -2   8  772.52   33.60
  -9  -2   8  771.02   34.90
  -9  -2   8  791.12   31.80
  -9   2   7   88.49    7.50
  -9   2   7  103.79   10.70
  -9   2   7  121.59   14.10
  -9  -2   7  107.29   10.10
  -9  -2   7  107.79    9.10
  -9  -2   7   97.49   10.80
  -9  -2   7   90.09    8.90
  -9   2   6  290.37   13.40
  -9   2   6  286.37   17.30
  -9   2   6  336.87   21.10
  -9  -2   6  314.87   14.90
  -9  -2   6  317.77   17.60
  -9  -2   6  323.47   16.30
  -9  -2   6  327.67   16.60
  -9   2   5  265.87   16.40
  -9   2   5  283.47   11.60
  -9   2   5  310.27   19.80
  -9  -2   5  311.17   13.50
  -9  -2   5  323.07   16.90
  -9  -2   5  277.27   14.80
  -9  -2   5  276.77   15.30
  -9   2   4 2131.89   74.79
  -9   2   4 1917.81   76.29
  -9   2   4 2007.50   78.79
  -9  -2   4 1897.21   73.39
  -9  -2   4 1956.90   69.99
  -9  -2   4 1942.41   75.89
  -9   2   3  370.16   20.20
  -9   2   3  406.16   18.30
  -9   2   3  395.56   22.30
  -9  -2   3  375.36   19.80
  -9  -2   3  405.56   19.10
  -9  -2   3  357.86   17.10
  -9  -2   3  414.56   23.50
  -9   2   2  520.75   26.00
  -9   2   2  494.95   24.80
  -9   2   2  504.85   21.30
  -9  -2   2  535.95   27.10
  -9  -2   2  494.95   22.40
  -9  -2   2  478.35   23.80
  -9  -2   2  460.85   20.30
  -9   2   1   -0.10    2.40
  -9   2   1   -3.70    5.10
  -9   2   1    0.00    6.30
  -9  -2   1   -5.00    5.10
  -9  -2   1    3.20    5.10
  -9  -2   1   -9.30    4.40
  -9  -2   1    0.90    2.00
  -9   2   0   56.19    9.40
  -9   2   0   59.69    4.90
  -9   2   0   56.09    8.80
  -9  -2   0   61.29    8.70
  -9  -2   0   66.39    9.70
  -9  -2   0   46.70    4.30
  -9  -2   0   43.90    7.50
  -9   2  -1  513.75   20.40
  -9   2  -1  506.75   27.40
  -9   2  -1  518.25   25.60
  -9  -2  -1  535.55   25.90
  -9  -2  -1  590.14   27.70
  -9  -2  -1  490.75   20.40
  -9  -2  -1  565.14   24.50
  -9   2  -2  138.29    6.90
  -9   2  -2  134.79   11.50
  -9   2  -2  128.59   15.00
  -9  -2  -2  139.69    7.10
  -9  -2  -2  131.49   13.10
  -9  -2  -2  165.68   14.60
  -9  -2  -2  127.19   12.10
  -9   2  -3  608.14   32.90
  -9   2  -3  618.14   23.80
  -9   2  -3  651.63   28.10
  -9  -2  -3  660.13   28.60
  -9  -2  -3  610.64   30.60
  -9  -2  -3  682.83   32.20
  -9  -2  -3  631.74   24.60
  -9   2  -4 2653.03   92.19
  -9   2  -4 2481.65  103.09
  -9   2  -4 2445.36   95.89
  -9  -2  -4 2514.25  100.39
  -9  -2  -4 2784.22  100.89
  -9  -2  -4 2598.14   93.19
  -9  -2  -4 2566.44   91.69
  -9   2  -5  254.17   11.10
  -9   2  -5  237.98   15.20
  -9  -2  -5  242.08   16.40
  -9  -2  -5  225.28   18.90
  -9  -2  -5  263.07   20.20
  -9  -2  -5  244.98   12.20
  -9   2  -6   10.10    2.90
  -9   2  -6    6.60    5.70
  -9  -2  -6   11.60    8.00
  -9  -2  -6    7.50    3.80
  -9  -2  -6    7.80    7.80
  -9  -2  -6    5.90    9.50
  -9   2  -7   -0.60    3.00
  -9   2  -7   15.90    6.50
  -9  -2  -7   -4.40    8.10
  -9  -2  -7    2.40    4.10
  -9   2  -8  248.48   18.50
  -9  -2  -8  227.58   20.20
  -9  -2  -8  235.08   15.10
  -9   2  -9  411.56   25.60
  -9  -2  -9  382.36   21.70
  -9   2 -10  214.78   20.80
  -9  -2 -10  199.78   16.50
  -9   2 -11  176.78   20.40
  -9  -2 -11  135.69   15.70
  -9   2 -12   72.79   15.90
  -9  -2 -12   78.69   14.00
  -9   2 -13    4.70   12.30
  -9  -2 -13    4.00    9.80
  -9   2 -14  260.97   29.20
  -9  -2 -14  243.78   25.50
[truncated: 202,497 more chars]
