# Supplementary material
Source: MDPI journal article supplement (https://www.mdpi.com/2073-4352/10/12/1122)
Supplement: s1 [file s1 › Compound_4.cif]

data_Compound_4_mo_tdv9_n_0m
_audit_creation_date               2020-10-11
_audit_creation_method
;
Olex2 1.3
(compiled 2020.07.31 svn.rc2a77460 for OlexSys, GUI svn.r6145)
;
_shelx_SHELXL_version_number       '2018/3'
_audit_contact_author_address      ?
_audit_contact_author_email        ?
_audit_contact_author_name         ''
_audit_contact_author_phone        ?
_publ_contact_author_id_orcid      ?
_publ_section_references
;
Dolomanov, O.V., Bourhis, L.J., Gildea, R.J, Howard, J.A.K. & Puschmann, H.
 (2009), J. Appl. Cryst. 42, 339-341.

Sheldrick, G.M. (2015). Acta Cryst. C71, 3-8.
;
_chemical_name_common              ?
_chemical_name_systematic
;
 ? 
;
_chemical_formula_moiety           'H4 N2 O10 U, 2(N O3), 2(C H6 N)'
_chemical_formula_sum              'C2 H16 N6 O16 U'
_chemical_formula_weight           618.24
_chemical_melting_point            ?
loop_
  _atom_type_symbol
  _atom_type_description
  _atom_type_scat_dispersion_real
  _atom_type_scat_dispersion_imag
  _atom_type_scat_source
 'C' 'C' 0.0033 0.0016 'International Tables Vol C Tables 4.2.6.8 and 6.1.1.4'
 'H' 'H' 0.0000 0.0000 'International Tables Vol C Tables 4.2.6.8 and 6.1.1.4'
 'N' 'N' 0.0061 0.0033 'International Tables Vol C Tables 4.2.6.8 and 6.1.1.4'
 'O' 'O' 0.0106 0.0060 'International Tables Vol C Tables 4.2.6.8 and 6.1.1.4'
 'U' 'U' -9.6767 9.6646 'International Tables Vol C Tables 4.2.6.8 and 6.1.1.4'

_shelx_space_group_comment
;
The symmetry employed for this shelxl refinement is uniquely defined
by the following loop, which should always be used as a source of
symmetry information in preference to the above space-group names.
They are only intended as comments.
;
_space_group_crystal_system        'triclinic'
_space_group_IT_number             2
_space_group_name_H-M_alt          'P -1'
_space_group_name_Hall             '-P 1'
loop_
  _space_group_symop_operation_xyz
 'x, y, z'
 '-x, -y, -z'

_cell_length_a                     5.7104(5)
_cell_length_b                     7.6993(7)
_cell_length_c                     10.2304(9)
_cell_angle_alpha                  78.072(2)
_cell_angle_beta                   75.750(2)
_cell_angle_gamma                  75.623(2)
_cell_volume                       417.19(6)
_cell_formula_units_Z              1
_cell_measurement_reflns_used      6125
_cell_measurement_temperature      100(2)
_cell_measurement_theta_max        36.26
_cell_measurement_theta_min        2.76
_shelx_estimated_absorpt_T_max     ?
_shelx_estimated_absorpt_T_min     ?
_exptl_absorpt_coefficient_mu      9.821
_exptl_absorpt_correction_T_max    0.4624
_exptl_absorpt_correction_T_min    0.3101
_exptl_absorpt_correction_type     'multi-scan'
_exptl_absorpt_process_details     'SADABS; Bruker, 2013'
_exptl_absorpt_special_details     ?
_exptl_crystal_colour              'light green'
_exptl_crystal_density_diffrn      2.461
_exptl_crystal_density_meas        .
_exptl_crystal_density_method      'not measured'
_exptl_crystal_description         'lamina'
_exptl_crystal_F_000               290
_exptl_crystal_size_max            0.12
_exptl_crystal_size_mid            0.10
_exptl_crystal_size_min            0.01
_exptl_special_details
;
 ? 
;
_exptl_transmission_factor_max     ?
_exptl_transmission_factor_min     ?
_diffrn_reflns_av_R_equivalents    0.0503
_diffrn_reflns_av_unetI/netI       0.0364
_diffrn_reflns_Laue_measured_fraction_full  0.990
_diffrn_reflns_Laue_measured_fraction_max  0.964
_diffrn_reflns_limit_h_max         7
_diffrn_reflns_limit_h_min         -8
_diffrn_reflns_limit_k_max         10
_diffrn_reflns_limit_k_min         -9
_diffrn_reflns_limit_l_max         14
_diffrn_reflns_limit_l_min         -7
_diffrn_reflns_number              4763
_diffrn_reflns_point_group_measured_fraction_full  0.990
_diffrn_reflns_point_group_measured_fraction_max  0.964
_diffrn_reflns_theta_full          25.242
_diffrn_reflns_theta_max           30.000
_diffrn_reflns_theta_min           2.079
_diffrn_ambient_temperature        100(2)
_diffrn_detector_area_resol_mean   ?
_diffrn_measured_fraction_theta_full  0.990
_diffrn_measured_fraction_theta_max  0.964
_diffrn_measurement_device_type    'Bruker Kappa APEX-II DUO CCD'
_diffrn_measurement_method         '\f and \w scans'
_diffrn_radiation_monochromator    'graphite'
_diffrn_radiation_type             MoK\a
_diffrn_radiation_wavelength       0.71073
_diffrn_source                     ?
_diffrn_standards_number           0
_reflns_Friedel_coverage           0.000
_reflns_Friedel_fraction_full      .
_reflns_Friedel_fraction_max       .
_reflns_number_gt                  2294
_reflns_number_total               2336
_reflns_special_details
;
 Reflections were merged by SHELXL according to the crystal
 class for the calculation of statistics and refinement.
 
 _reflns_Friedel_fraction is defined as the number of unique
 Friedel pairs measured divided by the number that would be
 possible theoretically, ignoring centric projections and
 systematic absences.
;
_reflns_threshold_expression       'I > 2\s(I)'
_computing_cell_refinement         'Bruker SAINT'
_computing_data_collection         'Bruker APEX2'
_computing_data_reduction          'Bruker SAINT'
_computing_molecular_graphics      'Olex2 1.3 (Dolomanov et al., 2009)'
_computing_publication_material    'Olex2 1.3 (Dolomanov et al., 2009)'
_computing_structure_refinement    'SHELXL (Sheldrick, 2015)'
_computing_structure_solution      'SHELXT (Sheldrick, 2015)'
_refine_diff_density_max           1.411
_refine_diff_density_min           -1.412
_refine_diff_density_rms           0.145
_refine_ls_extinction_coef         .
_refine_ls_extinction_method       none
_refine_ls_goodness_of_fit_ref     1.040
_refine_ls_hydrogen_treatment      constr
_refine_ls_matrix_type             full
_refine_ls_number_parameters       118
_refine_ls_number_reflns           2336
_refine_ls_number_restraints       0
_refine_ls_R_factor_all            0.0172
_refine_ls_R_factor_gt             0.0198
_refine_ls_restrained_S_all        1.040
_refine_ls_shift/su_max            0.000
_refine_ls_shift/su_mean           0.000
_refine_ls_structure_factor_coef   Fsqd
_refine_ls_weighting_details      
 'w=1/[\s^2^(Fo^2^)+(0.0290P)^2^+0.1589P] where P=(Fo^2^+2Fc^2^)/3'
_refine_ls_weighting_scheme        calc
_refine_ls_wR_factor_gt            0.0446
_refine_ls_wR_factor_ref           0.0463
_refine_special_details            ?
_olex2_refinement_description
;
1. Fixed Uiso
 At 1.2 times of:
  All N(H,H,H) groups
 At 1.5 times of:
  All C(H,H,H) groups, All O(H,H) groups
2.a Rotating group:
 O5(H5A,H5B)
2.b Idealised Me refined as rotating group:
 N2(H2A,H2B,H2C), C1(H1A,H1B,H1C)
;
_atom_sites_solution_hydrogens     mixed
_atom_sites_solution_primary       ?
_atom_sites_solution_secondary     ?
loop_
  _atom_site_label
  _atom_site_type_symbol
  _atom_site_fract_x
  _atom_site_fract_y
  _atom_site_fract_z
  _atom_site_U_iso_or_equiv
  _atom_site_adp_type
  _atom_site_occupancy
  _atom_site_site_symmetry_order
  _atom_site_calc_flag
  _atom_site_refinement_flags_posn
  _atom_site_refinement_flags_adp
  _atom_site_refinement_flags_occupancy
  _atom_site_disorder_assembly
  _atom_site_disorder_group
 U1 U 0.500000 0.500000 0.000000 0.00927(5) Uani 1 2 d S . P . .
 O1 O 0.2031(4) 0.6422(3) 0.0048(2) 0.0157(4) Uani 1 1 d . . . . .
 O2 O 0.3684(4) 0.2758(3) -0.0974(2) 0.0145(3) Uani 1 1 d . . . . .
 O3 O 0.3045(4) 0.2345(3) 0.1219(2) 0.0156(4) Uani 1 1 d . . . . .
 O4 O 0.2167(4) 0.0434(3) 0.0191(2) 0.0161(4) Uani 1 1 d . . . . .
 O5 O 0.4266(4) 0.4646(3) 0.2440(2) 0.0171(4) Uani 1 1 d . . . . .
 H5A H 0.560364 0.459566 0.268768 0.026 Uiso 1 1 d R U . . .
 H5B H 0.325744 0.421947 0.302308 0.026 Uiso 1 1 d R U . . .
 N1 N 0.2930(4) 0.1791(3) 0.0150(2) 0.0130(4) Uani 1 1 d . . . . .
 O6 O 0.1629(4) 0.5325(3) 0.6770(2) 0.0217(4) Uani 1 1 d . . . . .
 O7 O -0.1068(5) 0.6807(4) 0.5543(2) 0.0268(5) Uani 1 1 d . . . . .
 O8 O 0.2730(5) 0.7112(3) 0.4878(2) 0.0243(5) Uani 1 1 d . . . . .
 N3 N 0.1112(5) 0.6415(4) 0.5729(3) 0.0175(4) Uani 1 1 d . . . . .
 N2 N 0.0324(5) 0.1701(3) 0.7330(3) 0.0197(5) Uani 1 1 d . . . . .
 H2A H -0.068634 0.194002 0.674859 0.024 Uiso 1 1 calc R U . . .
 H2B H 0.087744 0.269106 0.731235 0.024 Uiso 1 1 calc R U . . .
 H2C H -0.048892 0.136288 0.816958 0.024 Uiso 1 1 calc R U . . .
 C1 C 0.2438(9) 0.0219(6) 0.6931(4) 0.0386(10) Uani 1 1 d . . . . .
 H1A H 0.327487 0.056374 0.601210 0.058 Uiso 1 1 calc R U . . .
 H1B H 0.184776 -0.086320 0.698718 0.058 Uiso 1 1 calc R U . . .
 H1C H 0.356326 -0.000460 0.753596 0.058 Uiso 1 1 calc R U . . .

loop_
  _atom_site_aniso_label
  _atom_site_aniso_U_11
  _atom_site_aniso_U_22
  _atom_site_aniso_U_33
  _atom_site_aniso_U_23
  _atom_site_aniso_U_13
  _atom_site_aniso_U_12
 U1 0.00829(7) 0.01008(7) 0.00891(6) -0.00098(4) -0.00126(4) -0.00183(4)
 O1 0.0123(8) 0.0158(8) 0.0180(9) -0.0033(7) -0.0041(7) 0.0002(7)
 O2 0.0176(9) 0.0157(8) 0.0109(8) -0.0007(7) -0.0024(7) -0.0062(7)
 O3 0.0191(9) 0.0175(8) 0.0113(8) -0.0025(7) -0.0034(7) -0.0051(7)
 O4 0.0154(9) 0.0130(8) 0.0199(9) -0.0012(7) -0.0031(7) -0.0050(7)
 O5 0.0195(9) 0.0257(10) 0.0081(8) 0.0015(7) -0.0030(7) -0.0114(8)
 N1 0.0107(9) 0.0133(9) 0.0142(10) -0.0009(8) -0.0035(7) -0.0008(8)
 O6 0.0235(11) 0.0279(10) 0.0149(9) 0.0027(8) -0.0079(8) -0.0088(9)
 O7 0.0200(10) 0.0428(14) 0.0165(10) 0.0080(9) -0.0064(8) -0.0120(10)
 O8 0.0234(11) 0.0324(11) 0.0181(10) 0.0006(9) 0.0017(8) -0.0172(9)
 N3 0.0197(11) 0.0222(11) 0.0121(10) -0.0010(8) -0.0017(8) -0.0099(9)
 N2 0.0265(12) 0.0187(10) 0.0123(10) 0.0003(8) -0.0025(9) -0.0056(9)
 C1 0.055(2) 0.0324(17) 0.0218(16) -0.0114(14) -0.0149(15) 0.0164(17)

_geom_special_details
;
 All esds (except the esd in the dihedral angle between two l.s. planes)
 are estimated using the full covariance matrix.  The cell esds are taken
 into account individually in the estimation of esds in distances, angles
 and torsion angles; correlations between esds in cell parameters are only
 used when they are defined by crystal symmetry.  An approximate (isotropic)
 treatment of cell esds is used for estimating esds involving l.s. planes.
;
loop_
  _geom_bond_atom_site_label_1
  _geom_bond_atom_site_label_2
  _geom_bond_distance
  _geom_bond_site_symmetry_2
  _geom_bond_publ_flag
 U1 O1 1.771(2) . ?
 U1 O1 1.771(2) 2_665 ?
 U1 O2 2.502(2) 2_665 ?
 U1 O2 2.502(2) . ?
 U1 O3 2.525(2) . ?
 U1 O3 2.525(2) 2_665 ?
 U1 O5 2.396(2) . ?
 U1 O5 2.397(2) 2_665 ?
 O2 N1 1.274(3) . ?
 O3 N1 1.275(3) . ?
 O4 N1 1.217(3) . ?
 O5 H5A 0.8519 . ?
 O5 H5B 0.7991 . ?
 O6 N3 1.260(3) . ?
 O7 N3 1.258(4) . ?
 O8 N3 1.247(3) . ?
 N2 H2A 0.8900 . ?
 N2 H2B 0.8900 . ?
 N2 H2C 0.8900 . ?
 N2 C1 1.480(4) . ?
 C1 H1A 0.9600 . ?
 C1 H1B 0.9600 . ?
 C1 H1C 0.9600 . ?

loop_
  _geom_angle_atom_site_label_1
  _geom_angle_atom_site_label_2
  _geom_angle_atom_site_label_3
  _geom_angle
  _geom_angle_site_symmetry_1
  _geom_angle_site_symmetry_3
  _geom_angle_publ_flag
 O1 U1 O1 180.0 . 2_665 ?
 O1 U1 O2 89.72(8) 2_665 2_665 ?
 O1 U1 O2 89.72(8) . . ?
 O1 U1 O2 90.28(8) . 2_665 ?
 O1 U1 O2 90.28(8) 2_665 . ?
 O1 U1 O3 90.01(8) 2_665 . ?
 O1 U1 O3 89.99(8) 2_665 2_665 ?
 O1 U1 O3 90.01(8) . 2_665 ?
 O1 U1 O3 89.99(8) . . ?
 O1 U1 O5 89.30(9) 2_665 2_665 ?
 O1 U1 O5 90.70(9) . 2_665 ?
 O1 U1 O5 89.30(9) . . ?
 O1 U1 O5 90.70(9) 2_665 . ?
 O2 U1 O2 180.0 2_665 . ?
 O2 U1 O3 129.33(6) . 2_665 ?
 O2 U1 O3 50.67(6) 2_665 2_665 ?
 O2 U1 O3 129.33(6) 2_665 . ?
 O2 U1 O3 50.67(6) . . ?
 O3 U1 O3 180.0 . 2_665 ?
 O5 U1 O2 116.38(7) . . ?
 O5 U1 O2 63.62(7) . 2_665 ?
 O5 U1 O2 63.62(7) 2_665 . ?
 O5 U1 O2 116.38(7) 2_665 2_665 ?
 O5 U1 O3 65.73(7) . . ?
 O5 U1 O3 114.27(7) . 2_665 ?
 O5 U1 O3 114.28(7) 2_665 . ?
 O5 U1 O3 65.73(7) 2_665 2_665 ?
 O5 U1 O5 180.0 . 2_665 ?
 N1 O2 U1 97.63(15) . . ?
 N1 O3 U1 96.53(15) . . ?
 U1 O5 H5A 109.6 . . ?
 U1 O5 H5B 131.7 . . ?
 H5A O5 H5B 114.2 . . ?
 O2 N1 U1 57.07(13) . . ?
 O2 N1 O3 115.1(2) . . ?
 O3 N1 U1 58.09(13) . . ?
 O4 N1 U1 177.49(19) . . ?
 O4 N1 O2 122.1(2) . . ?
 O4 N1 O3 122.8(2) . . ?
 O7 N3 O6 119.6(3) . . ?
 O8 N3 O6 121.0(3) . . ?
 O8 N3 O7 119.4(3) . . ?
 H2A N2 H2B 109.5 . . ?
 H2A N2 H2C 109.5 . . ?
 H2B N2 H2C 109.5 . . ?
 C1 N2 H2A 109.5 . . ?
 C1 N2 H2B 109.5 . . ?
 C1 N2 H2C 109.5 . . ?
 N2 C1 H1A 109.5 . . ?
 N2 C1 H1B 109.5 . . ?
 N2 C1 H1C 109.5 . . ?
 H1A C1 H1B 109.5 . . ?
 H1A C1 H1C 109.5 . . ?
 H1B C1 H1C 109.5 . . ?

loop_
  _geom_torsion_atom_site_label_1
  _geom_torsion_atom_site_label_2
  _geom_torsion_atom_site_label_3
  _geom_torsion_atom_site_label_4
  _geom_torsion
  _geom_torsion_site_symmetry_1
  _geom_torsion_site_symmetry_2
  _geom_torsion_site_symmetry_3
  _geom_torsion_site_symmetry_4
  _geom_torsion_publ_flag
 U1 O2 N1 O3 2.5(2) . . . . ?
 U1 O2 N1 O4 -177.2(2) . . . . ?
 U1 O3 N1 O2 -2.5(2) . . . . ?
 U1 O3 N1 O4 177.2(2) . . . . ?

_shelx_res_file
;
TITL mo_TDV9_n_0m in P1 #1 New: P-1
    mo_tdv9_n_0m.res
    created by SHELXL-2018/3 at 17:53:42 on 11-Oct-2020
CELL 0.71073 5.7104 7.6993 10.2304 78.072 75.75 75.623
ZERR 1 0.0005 0.0007 0.0009 0.002 0.002 0.002
LATT 1
SFAC C H N O U
UNIT 2 16 6 16 1

L.S. 20
PLAN  5
CONF
CONN 8 U1
BOND $H
Htab
MORE -1
fmap 2
acta
OMIT -4 60
REM <olex2.extras>
REM <HklSrc "%.\\mo_TDV9_n_0m.hkl">
REM </olex2.extras>

WGHT    0.029000    0.158900
FVAR       0.38940
U1    5    0.500000    0.500000    0.000000    10.50000    0.00829    0.01008 =
         0.00891   -0.00098   -0.00126   -0.00183
O1    4    0.203077    0.642210    0.004832    11.00000    0.01231    0.01580 =
         0.01802   -0.00331   -0.00407    0.00024
O2    4    0.368358    0.275804   -0.097410    11.00000    0.01761    0.01571 =
         0.01092   -0.00074   -0.00237   -0.00621
O3    4    0.304480    0.234500    0.121884    11.00000    0.01912    0.01746 =
         0.01129   -0.00247   -0.00341   -0.00506
O4    4    0.216740    0.043391    0.019069    11.00000    0.01545    0.01304 =
         0.01990   -0.00116   -0.00309   -0.00499
O5    4    0.426564    0.464567    0.244038    11.00000    0.01947    0.02565 =
         0.00808    0.00148   -0.00301   -0.01144
AFIX   7
H5A   2    0.560364    0.459566    0.268768    11.00000   -1.50000
H5B   2    0.325744    0.421947    0.302308    11.00000   -1.50000
AFIX   0
N1    3    0.292976    0.179064    0.014968    11.00000    0.01069    0.01325 =
         0.01415   -0.00093   -0.00345   -0.00082

O6    4    0.162932    0.532494    0.676979    11.00000    0.02353    0.02787 =
         0.01490    0.00274   -0.00791   -0.00881
O7    4   -0.106847    0.680692    0.554287    11.00000    0.01998    0.04278 =
         0.01647    0.00804   -0.00641   -0.01201
O8    4    0.272966    0.711200    0.487819    11.00000    0.02338    0.03238 =
         0.01810    0.00062    0.00169   -0.01716
N3    3    0.111194    0.641481    0.572865    11.00000    0.01973    0.02221 =
         0.01210   -0.00101   -0.00167   -0.00993
N2    3    0.032435    0.170101    0.733023    11.00000    0.02647    0.01867 =
         0.01232    0.00027   -0.00250   -0.00559
AFIX 137
H2A   2   -0.068634    0.194002    0.674859    11.00000   -1.20000
H2B   2    0.087744    0.269106    0.731235    11.00000   -1.20000
H2C   2   -0.048892    0.136288    0.816958    11.00000   -1.20000
AFIX   0
C1    1    0.243835    0.021898    0.693131    11.00000    0.05479    0.03237 =
         0.02180   -0.01144   -0.01490    0.01639
AFIX 137
H1A   2    0.327487    0.056374    0.601210    11.00000   -1.50000
H1B   2    0.184776   -0.086320    0.698718    11.00000   -1.50000
H1C   2    0.356326   -0.000460    0.753596    11.00000   -1.50000
AFIX   0
HKLF 4


REM  mo_TDV9_n_0m in P1 #1 New: P-1
REM wR2 = 0.0446, GooF = S = 1.040, Restrained GooF = 1.040 for all data
REM R1 = 0.0172 for 2336 Fo > 4sig(Fo) and 0.0172 for all 2336 data
REM 118 parameters refined using 0 restraints

END

WGHT      0.0290      0.1589

REM Instructions for potential hydrogen bonds
EQIV $2 -x+1, -y+1, -z+1
HTAB O5 O6_$2
HTAB O5 N3_$2
EQIV $3 -x, -y+1, -z+1
HTAB O5 O7_$3
HTAB O5 N3_$3
HTAB N2 O7_$3
HTAB N2 O8_$3
HTAB N2 N3_$3
HTAB N2 O6
HTAB N2 O1_$3
EQIV $4 -x, -y, -z+1
HTAB N2 O4_$4
HTAB C1 O7_$3

REM Highest difference peak  1.411,  deepest hole -1.412,  1-sigma level  0.145
Q1    1   0.3899  0.5170  0.0027  11.00000  0.05    1.41
Q2    1   0.3281  0.6501 -0.0215  11.00000  0.05    1.22
Q3    1   0.2978  0.5735  0.0772  11.00000  0.05    1.08
Q4    1   0.4679  0.4705  0.0795  11.00000  0.05    0.93
Q5    1   0.3239  0.4328  0.0363  11.00000  0.05    0.81
;
_shelx_res_checksum                84747
_shelx_hkl_file
;
   0   0   1 1274.23    7.52
   0   0   2 1640.54   11.43
   0   0   3 1413.63    5.59
   0   0   3 1378.95    5.29
   0   0   3 1529.56   11.88
   0   0   4 1545.92    6.89
   0   0   4 1584.55    6.99
   0   0   4 1644.93   11.82
   0   0   5  359.46    1.98
   0   0   5  363.66    2.16
   0   0   5  384.49    4.10
   0   0   6  520.19    2.71
   0   0   6  529.90    2.93
   0   0   6  558.20    5.45
   0   0   7  759.81    3.65
   0   0   7  762.35    3.85
   0   0   7  842.51    7.28
   0   0   8  498.30    3.31
   0   0   8  498.57    3.41
   0   0   8  542.72    6.41
   0   0   9  550.06    3.80
   0   0   9  522.98    3.74
   0   0   9  584.80    7.16
   0   0  10  319.24    3.20
   0   0  10  283.92    3.01
   0   0  10  314.88    5.73
   0   0  11  223.60    2.95
   0   0  11  200.36    2.76
   0   0  11  215.02    5.15
   0   0  12  258.55    3.35
   0   0  12  251.89    5.90
   0   0  13  121.10    2.60
   0   0  13  113.54    4.48
   0   0  14  102.79    2.55
   0   0  14   90.99    4.41
   0   0  15   81.21    2.35
   0   0  15   77.78    4.43
   0  -1  15  107.08    3.08
   0  -1  15   90.34    4.66
   0  -1  14   78.82    2.68
   0  -1  14   74.01    4.08
   0  -1  13  183.59    3.50
   0  -1  13  166.81    5.23
   0  -1  12  190.42    3.39
   0  -1  12  190.19    5.19
   0  -1  11  177.22    3.08
   0  -1  11  176.43    4.71
   0  -1  10   60.34    1.91
   0  -1  10   64.08    2.94
   0  -1   9  320.76    3.56
   0  -1   9  304.63    3.49
   0  -1   9  338.08    5.51
   0  -1   8  209.05    2.74
   0  -1   8  196.84    2.70
   0  -1   8  221.30    4.21
   0  -1   7  230.73    2.66
   0  -1   7  228.76    2.70
   0  -1   7  247.85    4.07
   0  -1   6  366.22    3.08
   0  -1   6  359.67    3.14
   0  -1   6  381.02    4.53
   0  -1   5  428.08    3.08
   0  -1   5  419.62    3.17
   0  -1   5  463.47    4.49
   0  -1   4  923.91    5.06
   0  -1   4  922.29    4.34
   0  -1   4  984.79    5.74
   0  -1   3  226.72    1.94
   0  -1   3  232.80    2.06
   0  -1   3  249.55    2.54
   0  -1   2  850.95    5.85
   0  -1   2  868.83    6.44
   0  -1   2  941.13    7.55
   0   1  -2  936.01    3.89
   0  -1   1  359.67    2.03
   0  -1   1  353.75    2.13
   0  -1   1  390.67    2.44
   0   1  -1  360.72    2.15
   0   1  -1  381.20    2.58
   0  -1   0 1378.98    8.22
   0   1   0 1308.00    7.42
   0   1   0 1376.51    8.92
   0  -1  -1  439.06    1.91
   0   1   1  426.05    2.24
   0   1   1  426.51    2.63
   0   1   1  497.91    2.75
   0   1   1  430.46    2.77
   0   1   2  571.24    2.58
   0   1   2  616.45    2.20
   0   1   2  655.49    5.05
   0   1   2  570.74    3.90
   0   1   3 1065.42    6.44
   0   1   3  950.67    7.14
   0   1   4  376.72    3.63
   0   1   6  347.42    4.37
   0   1   7  463.56    5.52
   0   1   8  393.11    5.54
   0   1   9  452.83    6.36
   0   1  10  391.96    2.80
   0   1  10  376.04    6.27
   0   1  11  153.89    2.04
   0   1  11  137.16    4.26
   0   1  12  247.26    5.87
   0   1  14  117.80    4.83
   0   1  15   57.23    3.99
   0  -2  14   83.59    3.02
   0  -2  14   85.21    4.29
   0  -2  13  223.28    4.29
   0  -2  13  227.13    5.97
   0  -2  12  163.11    3.59
   0  -2  12  162.58    4.87
   0  -2  11  199.86    3.69
   0  -2  11  199.11    4.98
   0  -2  10  153.35    3.12
   0  -2  10  160.82    4.25
   0  -2   9  284.33    3.88
   0  -2   9  284.87    5.10
   0  -2   8  190.47    3.06
   0  -2   8  190.16    3.12
   0  -2   8  191.74    3.97
   0  -2   7  334.78    3.76
   0  -2   7  331.46    3.79
   0  -2   7  366.51    4.92
   0  -2   6  692.48    5.06
   0  -2   6  687.06    5.12
   0  -2   6  743.34    6.32
   0  -2   5  510.77    4.13
   0  -2   5  494.52    4.17
   0  -2   5  518.16    4.79
   0  -2   4  987.91    5.39
   0  -2   4  997.62    5.59
   0  -2   4 1085.38    6.14
   0   2  -4 1097.91    4.74
   0  -2   3 1658.79   11.59
   0  -2   3 1745.48    9.47
   0  -2   3 1800.30   11.44
   0   2  -3 1761.07    9.53
   0  -2   2  482.27    3.38
   0  -2   2  507.83    3.65
   0  -2   2  549.28    2.87
   0  -2   2  553.68    3.28
   0   2  -2  514.97    3.65
   0   2  -2  529.56    3.12
   0  -2   1  282.01    2.47
   0   2  -1  273.98    2.57
   0   2  -1  275.82    2.17
   0  -2   0  447.54    2.87
   0   2   0  456.45    3.13
   0   2   0  441.34    2.50
   0  -2  -1 1295.13    7.37
   0   2   1 1308.24    7.39
   0   2   1 1223.54    7.96
   0   2   1 1243.74    6.25
   0   2   1 1193.92    6.71
   0   2   2   14.83    0.61
   0   2   2   14.72    0.66
   0   2   2   18.85    0.87
   0   2   2   14.79    0.68
   0   2   3 1384.94    7.17
   0   2   3 1365.37    8.63
   0   2   3 1670.67   12.57
   0   2   3 1362.74    7.26
   0   2   4  580.65    2.41
   0   2   4  615.93    2.78
   0   2   4  676.44    5.01
   0   2   4  606.89    4.48
   0   2   5  997.58    3.28
   0   2   5 1083.15    7.04
   0   2   6  419.06    4.90
   0   2   7  322.54    4.70
   0   2   8  233.85    4.43
   0   2   9  186.31    4.30
   0   2  10  179.28    4.50
   0   2  11   46.95    2.84
   0   2  13  150.15    5.08
   0   2  14   66.27    3.96
   0   2  15   54.15    3.94
   0  -3  14   45.53    2.73
   0  -3  14   39.98    3.46
   0  -3  13   47.52    2.67
   0  -3  13   50.43    3.45
   0  -3  12  129.99    3.62
   0  -3  12  131.16    4.51
   0  -3  11  138.28    3.54
   0  -3  11  142.55    4.38
   0  -3  10  126.63    3.22
   0  -3  10  139.60    4.04
   0  -3   9  169.13    3.48
   0  -3   9  174.19    4.12
   0  -3   8  376.18    4.78
   0  -3   8  396.33    5.60
   0  -3   7  210.55    3.47
   0  -3   7  233.26    4.05
   0  -3   6  262.03    3.66
   0  -3   6  268.51    3.76
   0  -3   6  282.27    4.03
   0  -3   5  196.30    3.06
   0  -3   5  196.45    3.13
   0  -3   5  204.97    3.17
   0   3  -5  206.85    2.71
   0  -3   4  332.94    3.72
   0  -3   4  345.76    3.91
   0  -3   4  358.98    3.69
   0   3  -4  344.98    3.32
   0  -3   3  684.22    5.04
   0  -3   3  777.66    3.99
   0  -3   3  722.81    4.59
   0   3  -3  696.84    5.27
   0   3  -3  694.34    4.51
   0  -3   2   99.49    1.92
   0  -3   2  113.91    1.69
   0   3  -2  100.55    2.02
   0   3  -2  109.40    1.80
   0  -3   1  536.63    4.08
   0   3  -1  544.67    4.38
   0   3  -1  547.33    3.67
   0  -3   0  387.11    3.31
   0   3   0  381.12    3.55
   0   3   0  375.48    2.85
   0   3   0  408.74    2.26
   0  -3  -1 1163.34    5.36
   0   3   1 1131.95    7.74
   0   3   1 1094.63    7.06
   0   3   1 1146.79    6.59
   0   3   2   32.01    0.99
   0   3   2   34.88    1.13
   0   3   2   38.09    1.02
   0   3   3  669.17    3.89
   0   3   3  654.70    4.15
   0   3   3  655.90    4.24
   0   3   4  622.19    3.62
   0   3   4  622.18    3.90
   0   3   4  765.14    5.60
   0   3   4  643.30    4.76
   0   3   5  575.08    3.36
   0   3   5  555.78    3.56
   0   3   5  661.88    5.76
   0   3   5  583.04    5.06
   0   3   6  386.07    2.68
   0   3   6  388.35    2.90
   0   3   6  437.06    5.16
   0   3   7  284.46    2.25
   0   3   7  283.60    2.43
   0   3   7  319.27    4.83
   0   3   8  336.10    2.41
   0   3   8  331.00    2.53
   0   3   8  356.16    5.46
   0   3   9  208.16    4.61
   0   3  10  137.60    4.07
   0   3  11  138.80    4.40
   0   3  12  165.52    5.07
   0   3  13  182.22    5.59
   0   3  14   87.52    4.45
   0  -4  13   49.27    2.97
   0  -4  13   51.94    3.51
   0  -4  12  135.74    4.02
   0  -4  12  148.18    4.77
   0  -4  11   58.50    2.82
   0  -4  11   63.97    3.29
   0  -4  10  145.67    3.79
   0  -4  10  154.28    4.26
   0  -4   9  196.20    4.09
   0  -4   9  206.88    4.49
   0  -4   8  327.58    4.98
   0  -4   8  359.68    5.39
   0  -4   7  185.32    3.68
   0  -4   7  199.70    3.83
   0  -4   6  293.00    4.36
   0  -4   6  301.23    4.25
   0  -4   5  185.27    3.39
   0  -4   5  192.43    3.16
   0   4  -5  182.81    2.97
   0  -4   4  149.83    2.96
   0  -4   4  167.07    2.04
   0  -4   4  153.00    2.59
   0   4  -4  144.48    2.57
   0  -4   3  376.61    4.32
   0  -4   3  429.74    3.60
   0  -4   3  395.81    3.61
   0   4  -3  399.38    4.62
   0   4  -3  382.28    3.88
   0  -4   2  213.06    3.16
   0  -4   2  234.67    2.53
   0   4  -2  210.10    3.30
   0   4  -2  207.02    2.80
   0  -4   1  416.70    4.19
   0   4  -1  404.42    4.40
   0   4  -1  405.82    3.67
   0  -4   0  891.66    5.82
   0   4   0  885.13    6.29
   0   4   0  848.86    4.95
   0   4   0  901.44    4.31
   0  -4  -1  826.87    5.37
   0   4   1  790.12    5.80
   0   4   1  777.69    4.30
   0   4   1  810.39    3.82
   0  -4  -2  450.86    3.77
   0   4   2  470.08    4.08
   0   4   2  448.73    4.29
   0   4   2  449.20    2.51
   0   4   2  461.26    3.31
   0   4   3  345.81    3.44
   0   4   3  328.85    3.59
   0   4   3  352.46    3.30
   0   4   4  487.33    3.97
   0   4   4  498.27    4.29
   0   4   4  507.95    4.40
   0   4   5   63.85    1.56
   0   4   5   58.11    1.59
   0   4   5   79.71    2.35
   0   4   5   68.45    2.02
   0   4   6  350.28    3.30
   0   4   6  325.24    3.35
   0   4   6  406.48    5.18
   0   4   7  191.09    2.46
   0   4   7  183.22    2.52
   0   4   7  219.21    4.21
   0   4   8  231.66    2.67
   0   4   8  211.18    2.62
   0   4   8  256.29    4.85
   0   4   9  266.59    2.84
   0   4   9  246.01    2.74
   0   4   9  298.41    5.56
   0   4  10  284.34    2.91
   0   4  10  249.38    2.64
   0   4  12   83.58    3.97
   0   4  14   66.31    4.18
   0   4  15   63.37    4.37
   0  -5  13   57.44    3.36
   0  -5  12  117.26    4.15
   0  -5  12  117.99    4.40
   0  -5  11   97.87    3.64
   0  -5  11  101.58    3.93
   0  -5  10   96.56    3.56
   0  -5  10  103.81    3.69
   0  -5   9   92.49    3.28
   0  -5   9  102.55    3.43
   0  -5   8  124.17    3.56
   0  -5   8  133.85    3.55
   0  -5   7  147.02    3.68
   0  -5   7  158.64    3.54
   0  -5   6  184.02    3.87
   0  -5   6  191.17    3.53
   0  -5   5  203.30    3.94
   0  -5   5  206.34    3.37
   0   5  -5  188.96    3.37
   0  -5   4  180.59    3.57
   0  -5   4  186.36    2.93
   0   5  -4  178.52    3.18
   0  -5   3  360.09    4.77
   0  -5   3  371.29    3.66
   0   5  -3  349.41    4.19
   0  -5   2  330.31    4.39
   0  -5   2  350.55    3.26
   0   5  -2  322.23    4.56
   0   5  -2  325.74    3.90
   0  -5   1  128.60    2.74
   0   5  -1  118.46    2.81
   0   5  -1  121.35    2.36
   0  -5   0  467.36    4.85
   0   5   0  448.90    5.13
   0   5   0  419.92    3.97
   0   5   0  445.62    2.82
   0  -5  -1  373.11    4.15
   0   5   1  372.85    4.61
   0   5   1  372.49    3.43
   0   5   1  390.44    2.90
   0  -5  -2  583.46    4.95
   0   5   2  532.47    5.37
   0   5   2  535.57    3.37
   0   5   2  564.41    3.88
   0   5   3   98.87    2.27
   0   5   3   91.65    2.34
   0   5   3  102.10    1.99
   0   5   4  506.57    4.75
   0   5   4  466.43    4.85
   0   5   4  499.81    4.56
   0   5   5  222.50    3.18
   0   5   5  199.12    3.20
   0   5   5  226.61    3.48
   0   5   6  313.84    3.72
   0   5   6  272.13    3.64
   0   5   7  137.43    2.57
   0   5   7  121.42    2.49
   0   5   8  261.26    3.39
   0   5   8  230.35    3.24
   0   5   8  290.91    5.31
   0   5   9  361.16    3.95
   0   5   9  310.11    3.66
   0   5   9  386.17    6.47
   0   5  10  207.82    3.10
   0   5  10  179.12    2.80
   0   5  10  218.40    5.31
   0   5  11  136.86    2.41
   0   5  11  166.04    5.02
   0   5  12  132.15    2.24
   0   5  12  155.40    5.19
   0   5  13  139.27    5.24
   0   5  14   65.88    4.26
   0  -6  12  138.28    4.76
   0  -6  11  170.87    4.97
   0  -6  10   90.20    3.71
   0  -6   9  150.31    4.40
   0  -6   8  134.00    4.04
   0  -6   7  236.11    4.99
   0  -6   7  248.27    4.38
   0  -6   6  220.44    4.67
   0  -6   6  227.47    3.90
   0  -6   5  328.49    5.42
   0  -6   5  337.93    4.30
   0   6  -5  312.96    4.72
   0  -6   4  392.22    5.65
   0  -6   4  408.42    4.31
   0   6  -4  365.73    4.89
   0  -6   3  674.68    7.10
   0  -6   3  680.78    5.05
   0   6  -3  619.43    6.07
   0  -6   2  478.95    5.85
   0  -6   2  490.26    3.99
   0   6  -2  443.52    4.97
   0  -6   1  215.49    3.90
   0   6  -1  208.82    4.10
   0   6  -1  198.09    3.26
   0  -6   0  527.51    5.71
   0   6   0  498.98    6.04
   0   6   0  473.60    4.64
   0   6   1  303.69    4.68
   0   6   1  314.55    3.51
   0   6   1  326.14    2.80
   0   6   2  203.77    3.82
   0   6   2  215.48    2.48
   0   6   2  220.27    2.63
   0   6   3  247.94    4.11
   0   6   3  271.50    3.22
   0   6   4  550.22    5.96
   0   6   4  600.54    5.17
   0   6   5  336.81    4.64
   0   6   5  393.68    4.64
   0   6   6  265.49    4.09
   0   6   7  330.19    4.50
   0   6   8  163.62    3.23
   0   6   9  162.08    3.17
   0   6  10  125.15    2.79
   0   6  11   98.95    2.48
   0   6  12   84.31    2.26
   0   6  13   90.96    2.20
   0  -7  11   75.30    4.00
   0  -7  10   49.60    3.31
   0  -7   9  130.08    4.40
   0  -7   8  133.02    4.32
   0  -7   7  159.47    4.60
   0  -7   6  131.23    4.03
   0   7  -6  128.09    3.57
   0  -7   5  227.50    4.96
   0   7  -5  197.75    4.17
   0  -7   4  186.68    4.40
   0   7  -4  174.23    3.79
   0   7  -3  224.27    4.10
   0   7  -2  296.83    4.47
   0   7  -1  262.60    4.04
   0   7   0  279.59    5.10
   0   7   0  267.80    3.86
   0   7   1  350.05    5.54
   0   7   1  355.27    4.04
   0   7   2  302.69    5.10
   0   7   2  305.48    3.15
   0   7   3  350.22    5.39
   0   7   4  246.73    4.55
   0   7   4  289.73    3.80
   0   7   5  448.35    5.95
   0   7   6  309.23    4.94
   0   7   7  330.38    5.03
   0   7   8  157.90    3.58
   0   7   9  222.33    4.11
   0   7  10  154.11    3.46
   0   7  11   94.76    2.81
   0   7  12  106.15    2.87
   0   7  13  113.12    2.84
   0   8  -6  169.04    4.36
   0   8  -5  103.75    3.42
   0   8  -4   79.46    2.97
   0   8  -3  136.11    3.55
   0   8  -2  167.29    3.72
   0   8  -1   93.56    2.78
   0   8   0  171.97    3.37
   0   8   1  347.15    6.07
   0   8   1  352.06    4.27
   0   8   2  178.31    4.46
   0   8   2  173.85    2.50
   0   8   3  164.42    4.20
   0   8   4  120.04    3.61
   0   8   5  154.04    4.03
   0   8   6   67.95    2.86
   0   8   7  102.30    3.38
   0   8   8   80.79    3.07
   0   8   9  104.02    3.34
   0   8  10  112.46    3.39
   0   8  11   63.00    2.70
   0   8  12   58.20    2.60
   0   8  13   69.64    2.71
   0   9  -6  101.48    3.77
   0   9  -5   96.12    3.57
   0   9  -4  155.98    4.18
   0   9  -3  147.93    3.94
   0   9  -2  165.53    3.97
   0   9  -1  139.46    3.48
   0   9   0  188.60    3.71
   0   9   1  243.14    3.73
   0   9   2  187.11    4.93
   0   9   3  179.66    4.85
   0   9   4  171.70    4.70
   0   9   5  144.09    4.33
   0   9   6  116.92    3.92
   0   9   7   93.96    3.55
   0   9   8  119.81    3.87
   0   9   9   98.35    3.62
   0   9  10  119.19    3.84
   0   9  11   79.73    3.28
   0   9  12   79.91    3.22
   0  10  -7   30.04    2.84
   0  10  -6   47.26    3.09
   0  10  -5   63.68    3.27
   0  10  -4   77.10    3.37
   0  10  -3   88.92    3.39
   0  10  -2  118.26    3.63
   0  10  -1   83.47    2.96
   0  10   0   71.83    2.66
   0  10   1   84.13    2.38
   0  10   4   97.12    3.98
   0  10   5   80.81    3.75
   0  10   6  125.66    4.41
   0  10   7   87.83    3.79
   0  10   8   82.72    3.74
   0  10   9   46.59    3.07
   0  10  10   87.68    3.76
   0  11  -3   74.99    3.30
   0  11  -2   81.89    3.25
   0  11  -1   74.35    3.01
   0  11   0   54.00    2.44
   0  11   6   97.80    4.35
   0  11   7   64.32    3.80
   0  11   8   61.15    3.70
  -1  11   7   90.80    4.37
  -1  11   6   89.63    4.40
  -1  11   0   81.70    2.47
  -1  11  -1  100.07    3.16
  -1  11  -2   73.56    3.10
  -1  10   9   98.87    4.18
  -1  10   8  100.10    4.24
  -1  10   7   77.97    3.91
  -1  10   6   84.26    3.97
  -1  10   5  141.12    4.88
  -1  10   0   96.64    2.82
  -1  10  -1  109.69    3.28
  -1  10  -2   94.93    3.34
  -1  10  -3  123.34    3.90
  -1  10  -4   82.22    3.47
  -1  10  -5   69.23    3.40
  -1  10  -6   45.81    3.09
  -1   9  11   45.22    2.89
  -1   9  10   74.88    3.51
  -1   9   9   80.23    3.50
  -1   9   8   53.18    3.04
  -1   9   7   38.20    2.75
  -1   9   6   77.35    3.52
  -1   9   5   72.73    3.38
  -1   9   4   86.53    3.74
  -1   9   3   99.57    3.89
  -1   9   1  149.60    2.85
  -1   9   0  123.82    3.07
  -1   9  -1  116.54    3.24
  -1   9  -2   91.03    3.13
  -1   9  -3   85.04    3.20
  -1   9  -4   84.07    3.31
  -1   9  -5   69.08    3.20
  -1   9  -6   99.70    3.81
  -1   9  -7   93.65    3.86
  -1   8  12   52.70    2.77
  -1   8  11   81.79    3.24
  -1   8  10   70.47    3.13
  -1   8   9   80.32    3.29
  -1   8   8  123.84    3.82
  -1   8   7   97.26    3.54
  -1   8   7  109.81    3.68
  -1   8   6  116.50    3.78
  -1   8   5  139.01    4.10
  -1   8   4  142.57    4.18
  -1   8   3   93.25    3.54
  -1   8   2  151.67    4.29
  -1   8   1  135.70    4.14
  -1   8   1  134.85    2.70
  -1   8   0  113.85    2.85
  -1   8  -1  111.29    3.04
  -1   8  -2   99.99    3.06
  -1   8  -3   52.34    2.48
  -1   8  -4  102.70    3.36
  -1   8  -5   60.58    2.86
  -1   8  -6   63.38    3.02
  -1   7  13   84.39    2.86
  -1   7  12   69.26    2.74
  -1   7  11   68.70    2.78
  -1   7  10   69.53    2.79
  -1   7   9  121.98    3.46
  -1   7   8  161.56    3.93
  -1   7   7  158.79    3.88
  -1   7   7  189.29    4.38
  -1   7   6  211.32    4.45
  -1   7   6  250.84    4.66
  -1   7   5  339.74    5.59
  -1   7   5  379.33    5.28
  -1   7   4  277.61    5.12
  -1   7   4  307.80    4.53
  -1   7   3  215.76    4.60
  -1   7   3  231.55    3.74
  -1   7   2  189.59    4.34
  -1   7   2  187.75    2.31
  -1   7   2  202.37    3.34
  -1   7   1  257.62    5.03
  -1   7   1  255.64    3.45
  -1   7   0  243.55    5.02
  -1   7   0  239.49    3.72
  -1   7  -1  241.09    3.98
  -1   7  -2  263.10    4.37
  -1   7  -3  332.23    5.06
  -1   7  -4  338.85    5.31
  -1   7  -5  175.52    4.09
  -1   7  -6  150.51    3.97
   1  -7   6  160.95    4.61
   1  -7   7  197.80    5.11
   1  -7   8  130.88    4.50
   1  -7   9   78.64    3.79
   1  -7  10   95.27    4.19
   1  -7  11  119.34    4.69
  -1   6  13   74.89    2.42
  -1   6  12   82.23    2.61
  -1   6  11   98.39    2.82
  -1   6  11  118.09    4.60
  -1   6  10  126.09    3.17
  -1   6  10  145.30    4.67
  -1   6   9  141.21    3.33
  -1   6   8  190.25    3.84
  -1   6   8  205.64    4.69
  -1   6   7  125.49    3.21
  -1   6   7  141.99    3.75
  -1   6   6  131.01    3.30
  -1   6   6  139.44    3.47
  -1   6   5  320.18    4.92
  -1   6   5  354.89    4.94
  -1   6   4  190.70    3.91
  -1   6   4  200.08    3.58
  -1   6   3  176.87    3.81
  -1   6   3  187.40    3.26
  -1   6   2  221.84    4.26
  -1   6   2  228.32    2.42
  -1   6   2  244.11    3.49
  -1   6   1  385.89    5.58
  -1   6   1  385.56    3.91
  -1   6   1  382.41    4.11
  -1   6   0  117.62    3.25
  -1   6   0  124.37    2.57
  -1   6   0  132.04    2.54
  -1   6  -1  268.86    4.79
  -1   6  -1  261.88    3.84
  -1   6  -1  293.03    3.60
   1  -6   2  281.09    4.72
  -1   6  -3  281.79    4.35
   1  -6   3  295.06    4.98
  -1   6  -4  225.50    4.08
   1  -6   4  228.85    4.56
  -1   6  -5  294.30    4.75
   1  -6   5  308.79    5.41
  -1   6  -6  138.61    3.53
   1  -6   6  141.45    3.98
   1  -6   7  166.15    4.41
   1  -6   8  121.68    4.00
   1  -6   9  118.14    4.07
   1  -6  10   86.52    3.79
   1  -6  11  129.63    4.48
   1  -6  12  110.52    4.41
  -1   5  14   92.12    4.85
  -1   5  13   78.20    2.13
  -1   5  13   96.08    4.67
  -1   5  12  138.36    2.79
  -1   5  12  164.21    5.42
  -1   5  11  134.83    2.87
  -1   5  11  155.93    4.95
  -1   5  10  271.61    3.98
  -1   5  10  310.76    6.30
  -1   5   9  225.23    3.69
  -1   5   9  266.39    5.53
  -1   5   8  289.55    4.17
  -1   5   8  338.10    5.74
  -1   5   8  320.62    5.53
  -1   5   7  249.91    3.90
  -1   5   7  318.09    5.18
  -1   5   7  270.54    4.80
  -1   5   6  201.17    3.57
  -1   5   6  251.49    4.31
  -1   5   6  223.08    4.13
  -1   5   5  289.20    4.23
  -1   5   5  316.97    4.51
  -1   5   4  293.77    4.26
  -1   5   4  325.31    4.29
  -1   5   3  470.00    5.41
  -1   5   3  500.95    4.93
  -1   5   2  494.17    5.60
  -1   5   2  556.77    3.60
  -1   5   2  506.13    3.19
  -1   5   2  535.74    4.81
  -1   5   1  704.48    6.73
  -1   5   1  693.90    4.75
  -1   5   1  725.20    5.36
   1  -5  -1  749.35    6.22
  -1   5   0  668.08    6.61
  -1   5   0  668.37    5.17
  -1   5   0  723.87    5.29
   1  -5   0  708.83    6.28
  -1   5  -1  618.94    6.45
  -1   5  -1  620.31    5.32
   1  -5   1  654.04    6.25
  -1   5  -2  312.24    4.71
  -1   5  -2  308.60    4.00
   1  -5   2  306.81    4.47
  -1   5  -3  266.71    3.87
   1  -5   3  263.14    4.29
   1  -5   3  306.09    2.55
  -1   5  -4  339.61    4.51
   1  -5   4  354.68    5.13
   1  -5   4  395.83    3.46
  -1   5  -5  280.47    4.27
   1  -5   5  278.31    4.70
   1  -5   5  319.77    3.61
  -1   5  -6  134.19    3.18
   1  -5   6  140.03    3.55
   1  -5   6  164.96    3.01
   1  -5   7  292.39    5.17
   1  -5   7  337.51    4.56
   1  -5   8  283.69    5.23
   1  -5   8  317.34    4.85
   1  -5   9  156.08    4.19
   1  -5  10  107.96    3.72
   1  -5  11  125.61    4.09
   1  -5  12   95.02    3.86
   1  -5  13   62.87    3.49
  -1   4  15   74.69    4.73
  -1   4  14  148.36    5.71
  -1   4  13  108.36    4.76
  -1   4  12  183.38    2.81
  -1   4  12  208.15    5.83
  -1   4  11  148.08    2.68
  -1   4  11  166.00    5.00
  -1   4  10  159.19    2.84
  -1   4  10  186.18    4.90
  -1   4   9  189.67    3.11
  -1   4   9  175.19    2.98
  -1   4   9  197.74    4.70
  -1   4   8  428.80    4.40
  -1   4   8  410.72    4.41
  -1   4   8  449.35    6.38
  -1   4   8  404.89    6.00
  -1   4   7  328.17    3.81
  -1   4   7  317.30    3.92
  -1   4   7  351.99    5.28
  -1   4   7  309.46    4.94
  -1   4   6  186.83    2.90
  -1   4   6  174.84    2.99
  -1   4   6  215.53    3.90
  -1   4   6  182.24    3.63
  -1   4   5  571.05    4.87
  -1   4   5  533.16    5.06
  -1   4   5  630.63    5.85
  -1   4   5  533.58    5.54
  -1   4   4  720.86    5.45
  -1   4   4  698.58    5.82
  -1   4   4  843.08    6.05
  -1   4   4  719.61    5.97
  -1   4   3  217.04    3.09
  -1   4   3  196.81    3.20
  -1   4   3  258.53    3.06
  -1   4   3  214.01    3.16
  -1   4   2  461.72    4.82
  -1   4   2  485.20    2.78
  -1   4   2  462.56    2.54
  -1   4   2  475.75    4.30
  -1   4   1  796.31    6.36
  -1   4   1  824.73    4.62
  -1   4   1  846.90    5.48
   1  -4  -1  823.95    5.80
  -1   4   0  786.24    6.41
  -1   4   0  784.54    5.05
   1  -4   0  810.87    6.01
  -1   4  -1  289.65    4.03
  -1   4  -1  285.89    3.32
   1  -4   1  280.75    3.72
  -1   4  -2  588.30    5.72
  -1   4  -2  589.74    4.94
   1  -4   2  597.45    5.55
  -1   4  -3  263.43    3.96
  -1   4  -3  262.11    3.48
   1  -4   3  261.22    3.89
   1  -4   3  295.61    2.52
  -1   4  -4  399.78    4.40
   1  -4   4  404.45    4.92
   1  -4   4  466.89    3.83
   1  -4   4  445.54    3.66
  -1   4  -5  225.59    3.49
   1  -4   5  222.70    3.84
   1  -4   5  254.81    3.22
  -1   4  -6  232.36    3.66
   1  -4   6  233.04    4.09
   1  -4   6  261.83    3.66
   1  -4   7  265.81    4.50
   1  -4   7  305.94    4.33
   1  -4   8  371.45    5.46
   1  -4   8  443.98    5.63
   1  -4   9  181.56    4.07
   1  -4   9  217.59    4.40
   1  -4  10  164.93    4.05
   1  -4  10  185.52    4.41
   1  -4  11  149.70    4.08
   1  -4  11  169.00    4.56
   1  -4  12  101.78    3.62
   1  -4  12  109.04    4.09
   1  -4  13   47.76    2.99
   1  -4  14   60.93    3.25
  -1   3  15   53.00    4.15
  -1   3  14  117.76    5.12
  -1   3  12  147.42    4.98
  -1   3  11  115.92    2.37
  -1   3  11  125.90    2.35
  -1   3  11  126.66    4.36
  -1   3  10  104.12    2.25
  -1   3  10  107.59    2.24
  -1   3  10  117.60    3.98
  -1   3   9  249.18    3.19
  -1   3   9  252.67    3.21
  -1   3   9  273.04    5.35
  -1   3   8  199.52    2.78
  -1   3   8  201.69    2.89
  -1   3   8  214.75    4.47
  -1   3   8  197.70    4.19
  -1   3   7  369.90    3.58
  -1   3   7  362.78    3.74
  -1   3   7  390.15    5.43
  -1   3   7  348.78    5.08
  -1   3   6  440.42    3.81
  -1   3   6  419.65    3.98
  -1   3   6  462.11    5.40
  -1   3   6  408.33    5.08
  -1   3   5  866.14    5.22
  -1   3   5  840.27    5.56
  -1   3   5  943.69    6.94
  -1   3   5  815.24    6.54
  -1   3   4  898.52    5.30
  -1   3   4  866.54    5.68
  -1   3   4 1001.57    6.40
  -1   3   4  845.04    6.18
  -1   3   3  429.53    3.72
  -1   3   3  448.68    4.15
  -1   3   3  508.49    4.02
  -1   3   3  430.34    4.12
  -1   3   2  812.35    5.14
  -1   3   2  845.14    5.70
  -1   3   2  993.04    4.68
  -1   3   2  827.64    5.31
  -1   3   1  290.20    3.44
  -1   3   1  274.02    2.34
  -1   3   1  303.62    3.14
   1  -3  -1  295.16    3.10
  -1   3   0  528.37    4.65
  -1   3   0  525.57    3.67
   1  -3   0  522.33    4.28
  -1   3  -1  355.35    3.89
   1  -3   1  346.36    3.66
  -1   3  -2  857.10    6.07
  -1   3  -2  886.37    5.39
   1  -3   2  859.45    5.92
   1  -3   2 1002.19    3.91
  -1   3  -3  435.11    4.41
  -1   3  -3  465.39    4.10
   1  -3   3  432.55    4.39
   1  -3   3  504.34    3.75
   1  -3   3  499.77    3.23
  -1   3  -4  887.12    6.35
  -1   3  -4  901.73    5.85
   1  -3   4  853.28    6.36
   1  -3   4  942.30    5.24
  -1   3  -5  581.18    4.88
   1  -3   5  556.95    5.36
   1  -3   5  585.68    5.47
   1  -3   5  618.65    4.90
  -1   3  -6  353.50    3.96
   1  -3   6  342.83    4.40
   1  -3   6  382.29    4.35
   1  -3   7  236.27    3.84
   1  -3   7  270.34    4.08
   1  -3   8  293.99    4.41
   1  -3   8  342.72    4.96
   1  -3   9  148.51    3.39
   1  -3   9  167.66    3.91
   1  -3  10  164.96    3.69
   1  -3  10  187.21    4.40
   1  -3  11  134.10    3.53
   1  -3  11  139.23    4.18
   1  -3  12  130.80    3.66
   1  -3  12  137.92    4.44
   1  -3  13  108.91    3.55
   1  -3  13  116.31    4.42
   1  -3  14   97.18    3.53
   1  -3  15   49.64    3.82
  -1   2  15   60.07    4.23
  -1   2  14   65.52    4.13
  -1   2  13  110.14    4.66
  -1   2  12   56.48    1.74
  -1   2  12   56.85    3.45
  -1   2  11  240.05    3.06
  -1   2  11  248.88    5.80
  -1   2  10  102.22    2.10
  -1   2  10  100.92    2.09
  -1   2  10  117.04    3.92
  -1   2   9  193.76    2.66
  -1   2   9  183.23    2.59
  -1   2   9  204.19    4.64
  -1   2   8  182.50    2.52
  -1   2   8  176.36    2.45
  -1   2   8  199.75    4.29
  -1   2   7  349.35    3.29
  -1   2   7  354.00    3.21
  -1   2   7  372.66    5.25
  -1   2   7  356.40    5.01
  -1   2   6   74.71    1.64
  -1   2   6   79.83    1.59
  -1   2   6   88.89    2.55
  -1   2   6   84.31    2.42
  -1   2   5  206.88    2.50
  -1   2   5  214.41    2.35
  -1   2   5  225.14    3.43
  -1   2   5  211.14    3.31
  -1   2   4  624.56    4.20
  -1   2   4  651.22    3.93
  -1   2   4  695.98    5.25
  -1   2   4  636.27    5.14
  -1   2   3  161.39    2.22
  -1   2   3  173.65    2.09
  -1   2   3  179.04    2.39
  -1   2   3  171.51    2.53
  -1   2   2   91.10    1.57
  -1   2   2   95.65    1.76
  -1   2   2  101.89    1.54
  -1   2   2   94.87    1.79
  -1   2   1  231.44    2.46
  -1   2   1  243.74    2.74
  -1   2   1  244.15    2.01
  -1   2   1  228.51    1.77
  -1   2   1  273.63    1.84
  -1   2   1  256.72    2.67
   1  -2  -1  231.22    2.36
  -1   2   0  226.02    2.66
  -1   2   0  224.21    2.11
   1  -2   0  233.37    2.52
  -1   2  -1  192.40    2.50
  -1   2  -1  194.73    2.15
   1  -2   1  181.84    2.35
  -1   2  -2  173.30    2.40
  -1   2  -2  175.45    2.16
   1  -2   2  161.01    2.31
   1  -2   2  198.28    1.62
  -1   2  -3  311.51    3.21
  -1   2  -3  329.87    3.03
   1  -2   3  316.43    3.33
   1  -2   3  310.65    3.29
   1  -2   3  343.75    2.71
  -1   2  -4  428.23    3.52
   1  -2   4  393.59    3.84
   1  -2   4  399.29    3.83
   1  -2   4  446.18    3.66
  -1   2  -5  788.92    4.85
   1  -2   5  735.73    5.41
   1  -2   5  729.64    5.31
   1  -2   5  812.04    5.59
  -1   2  -6  137.92    2.19
   1  -2   6  133.45    2.52
   1  -2   6  136.77    2.53
   1  -2   6  150.63    2.84
   1  -2   7  158.83    2.87
   1  -2   7  158.41    2.82
   1  -2   7  175.99    3.34
   1  -2   8  239.20    3.58
   1  -2   8  277.37    4.49
   1  -2   9  138.85    2.92
   1  -2   9  154.43    3.76
   1  -2  10   52.11    2.11
   1  -2  10   64.66    2.87
   1  -2  11  124.33    3.07
   1  -2  11  136.58    4.12
   1  -2  12  189.37    3.84
   1  -2  12  206.08    5.24
   1  -2  13  114.91    3.24
   1  -2  14   95.46    3.18
   1  -2  14   99.36    4.45
   1  -2  15   86.01    3.20
   1  -2  15   88.72    4.54
  -1   1  15   86.08    4.76
  -1   1  14   39.18    3.50
  -1   1  13  141.69    2.75
  -1   1  13  140.43    5.08
  -1   1  12  143.30    2.72
  -1   1  12  125.97    4.59
  -1   1  11  271.20    3.44
  -1   1  11  233.48    5.60
  -1   1  10  236.67    3.06
  -1   1  10  220.07    5.11
  -1   1   9  438.53    3.84
  -1   1   9  376.07    6.09
  -1   1   8  690.25    4.49
  -1   1   8  568.32    4.21
  -1   1   8  603.46    7.10
  -1   1   7  482.38    3.57
  -1   1   7  393.68    3.37
  -1   1   7  442.53    5.64
  -1   1   7  431.67    5.36
  -1   1   6  296.30    2.68
  -1   1   6  242.30    2.53
  -1   1   6  273.56    4.14
  -1   1   6  274.73    3.98
  -1   1   5  305.52    2.61
  -1   1   5  256.69    2.44
  -1   1   5  284.87    3.82
  -1   1   5  268.45    3.59
  -1   1   4  869.35    4.25
  -1   1   4  771.24    3.95
  -1   1   4  829.84    5.71
  -1   1   3  400.19    2.90
  -1   1   3  379.25    2.72
  -1   1   3  405.16    3.52
  -1   1   3  394.58    3.52
  -1   1   2  434.69    3.05
  -1   1   2  433.73    2.87
  -1   1   2  472.44    3.21
  -1   1   2  432.30    3.34
  -1   1   1 1893.71   12.55
  -1   1   1 1881.77   11.51
  -1   1   1 1890.74    8.38
  -1   1   1 1884.97    7.68
  -1   1   1 2042.86   10.79
  -1   1   1 2067.72   14.07
   1  -1  -1 1948.13   11.02
   1  -1  -1 1691.14    9.90
  -1   1   0 1223.90    8.21
  -1   1   0 1344.76    7.68
   1  -1   0 1292.90    8.42
  -1   1  -1 1923.67   13.70
  -1   1  -1 1931.98   11.81
   1  -1   1 1759.24   10.77
  -1   1  -2  196.10    2.10
  -1   1  -2  213.86    2.02
   1  -1   2  190.83    2.16
   1  -1   2  205.92    2.20
   1  -1   2  235.82    1.91
  -1   1  -3  915.37    4.05
   1  -1   3  853.93    4.65
   1  -1   3  868.42    4.54
   1  -1   3  976.30    7.63
   1  -1   4  236.47    2.58
   1  -1   4  243.06    2.52
   1  -1   4  275.28    2.95
   1  -1   5  504.13    3.88
   1  -1   5  506.62    3.75
   1  -1   5  587.08    4.81
   1  -1   6   84.93    1.78
   1  -1   6   83.67    1.71
   1  -1   6   97.80    2.36
   1  -1   7  363.12    3.63
   1  -1   7  360.90    3.52
   1  -1   7  410.49    4.96
   1  -1   8  349.54    3.73
   1  -1   8  332.93    3.56
   1  -1   8  378.69    5.21
   1  -1   9  210.37    3.08
   1  -1   9  211.71    3.05
   1  -1   9  244.62    4.59
   1  -1  10  142.80    2.73
   1  -1  10  152.20    4.01
   1  -1  11  192.07    3.26
   1  -1  11  209.46    4.93
   1  -1  12   92.21    2.53
   1  -1  12  104.33    3.94
   1  -1  13   88.62    2.63
   1  -1  13   97.70    4.11
   1  -1  14   87.14    2.73
   1  -1  14   89.15    4.27
   1  -1  15   67.91    2.59
   1  -1  15   64.64    4.04
  -1   0  15   52.02    2.23
  -1   0  15   48.56    3.98
  -1   0  14   72.26    2.52
  -1   0  14   63.16    4.01
  -1   0  13  128.92    3.00
  -1   0  13  118.92    4.75
  -1   0  12  123.09    2.83
  -1   0  12  111.01    4.33
  -1   0  11   99.87    2.44
  -1   0  11   83.34    3.63
  -1   0  10  219.04    3.18
  -1   0  10  189.23    4.72
  -1   0   9   77.12    1.91
  -1   0   9   69.13    1.85
  -1   0   9   71.95    2.94
  -1   0   8  428.80    3.75
  -1   0   8  383.89    3.71
  -1   0   8  395.87    5.78
  -1   0   7  167.50    2.25
  -1   0   7  149.36    2.31
  -1   0   7  160.23    3.55
  -1   0   6  298.26    2.72
  -1   0   6  265.95    2.85
  -1   0   6  272.08    4.13
  -1   0   6  274.57    3.90
  -1   0   5  221.24    2.20
  -1   0   5  193.42    2.31
  -1   0   5  201.75    3.27
  -1   0   5  200.08    3.05
  -1   0   4  793.09    3.84
  -1   0   4  664.70    3.94
  -1   0   4  735.82    5.46
  -1   0   4  695.13    4.96
  -1   0   3  300.75    2.30
  -1   0   3  245.18    2.31
  -1   0   3  279.13    3.03
  -1   0   3  253.76    2.70
  -1   0   2  291.83    2.23
  -1   0   2  237.14    2.18
  -1   0   2  257.61    2.52
  -1   0   1 2144.89   13.92
  -1   0   1 1778.65   10.94
  -1   0   1 1938.80    7.54
  -1   0   1 1896.18   11.57
   1   0  -1 1716.83    9.74
   1   0  -1 1624.67    7.99
  -1   0   0  561.25    4.14
  -1   0   0  629.76    3.91
   1   0   0  496.76    2.95
   1   0   0  548.21    4.58
  -1   0  -1 1310.00    8.97
   1   0   1 1397.49    9.15
   1   0   1 1143.71    7.55
   1   0   2 1123.80    6.94
   1   0   2 1324.63    8.81
   1   0   3  669.08    3.49
   1   0   3  784.83    4.83
   1   0   3  889.13    4.72
   1   0   4  254.80    2.24
   1   0   4  272.24    2.11
   1   0   4  324.55    3.30
   1   0   5  707.79    3.82
   1   0   5  694.26    3.47
   1   0   5  836.41    5.86
   1   0   6  484.79    3.32
   1   0   6  464.62    3.03
   1   0   6  528.39    5.17
   1   0   7  252.04    2.57
   1   0   7  245.91    2.40
   1   0   7  274.70    4.17
   1   0   8  634.29    4.18
   1   0   8  618.04    3.96
   1   0   8  704.46    7.06
   1   0   9  599.97    4.27
   1   0   9  583.80    4.13
   1   0   9  668.07    7.44
   1   0  10  319.36    3.34
   1   0  10  315.14    3.30
   1   0  11  246.07    3.11
   1   0  11  254.09    3.19
   1   0  11  258.14    5.45
   1   0  12  206.46    3.04
   1   0  12  217.43    5.38
   1   0  13  169.56    2.91
   1   0  13  179.75    5.27
   1   0  14   87.66    2.35
   1   0  14   90.64    4.31
   1   0  15   91.96    2.44
   1   0  15   89.00    4.54
  -1  -1  14  143.09    3.60
  -1  -1  14  126.54    5.16
  -1  -1  13  143.03    3.44
  -1  -1  13  120.89    4.78
  -1  -1  12  264.81    4.26
  -1  -1  12  230.76    5.92
  -1  -1  11  139.81    3.05
  -1  -1  11  131.67    4.36
  -1  -1  10  298.93    4.01
  -1  -1  10  274.34    5.64
  -1  -1   9   79.63    2.14
  -1  -1   9   73.20    2.07
  -1  -1   9   74.65    3.04
  -1  -1   8  334.48    3.70
  -1  -1   8  304.52    3.68
  -1  -1   8  323.87    5.32
  -1  -1   7  347.60    3.53
  -1  -1   7  334.22    3.66
  -1  -1   7  335.12    4.99
  -1  -1   6  490.68    3.90
  -1  -1   6  474.75    4.13
  -1  -1   6  473.47    5.44
  -1  -1   5  523.41    3.75
  -1  -1   5  517.65    4.10
  -1  -1   5  520.44    5.20
  -1  -1   4 1172.24    9.19
  -1  -1   4 1179.32    7.22
  -1  -1   4 1164.92    8.12
  -1  -1   3 1597.94   11.43
  -1  -1   3 1568.79   11.25
  -1  -1   3 1662.21   13.56
  -1  -1   3 1505.14    9.75
  -1  -1   2  471.39    3.00
  -1  -1   2  452.77    3.30
  -1  -1   2  488.41    3.68
  -1  -1   2  442.19    2.87
   1   1  -2  414.61    2.12
  -1  -1   1  309.62    2.33
  -1  -1   1  304.64    2.58
  -1  -1   1  293.22    1.70
  -1  -1   1  301.27    2.00
   1   1  -1  310.52    2.60
   1   1  -1  287.16    1.84
  -1  -1   0  676.32    5.01
   1   1   0  581.08    3.34
   1   1   0  555.23    4.15
  -1  -1  -1  762.01    4.72
   1   1   1  767.12    3.46
   1   1   2  634.42    3.04
   1   1   2  566.02    2.86
   1   1   3   79.92    1.08
   1   1   3   77.60    1.04
   1   1   3   92.41    1.78
   1   1   4 1654.86    7.58
   1   1   4 1595.94    6.89
   1   1   4 1787.34    8.06
   1   1   4 1799.83   11.35
   1   1   5  686.73    2.79
   1   1   5  710.28    3.02
   1   1   5  777.81    5.86
   1   1   6  491.82    2.54
   1   1   6  542.17    2.39
   1   1   6  587.17    5.59
   1   1   7  109.89    1.39
   1   1   7  122.13    1.30
   1   1   7  135.51    3.11
   1   1   8  533.43    3.06
   1   1   8  532.15    2.83
   1   1   9  207.85    2.09
   1   1   9  212.94    2.03
   1   1   9  240.24    4.67
   1   1  10  131.10    1.80
   1   1  10  135.64    1.83
   1   1  10  144.01    3.97
   1   1  11  170.21    2.12
   1   1  11  181.89    2.25
   1   1  11  192.10    4.83
   1   1  12  177.56    2.28
   1   1  12  187.81    2.44
   1   1  12  189.96    5.11
   1   1  13  130.76    4.65
   1   1  15   76.88    4.33
   1   1  16   76.06    4.60
  -1  -2  14   86.23    3.24
  -1  -2  14   71.42    4.21
  -1  -2  13   82.86    3.09
  -1  -2  13   78.68    4.12
  -1  -2  12  179.09    3.92
  -1  -2  12  163.28    5.11
  -1  -2  11  180.26    3.72
  -1  -2  11  167.93    4.86
  -1  -2  10  218.20    3.82
  -1  -2  10  202.06    4.95
  -1  -2   9  212.69    3.58
  -1  -2   9  211.65    4.74
  -1  -2   8  359.60    4.29
  -1  -2   8  353.39    5.59
  -1  -2   7  693.99    5.56
  -1  -2   7  677.13    5.70
  -1  -2   7  693.05    7.18
  -1  -2   6  178.90    2.77
  -1  -2   6  173.92    2.85
  -1  -2   6  183.49    3.56
  -1  -2   5  702.30    5.00
  -1  -2   5  721.32    5.39
  -1  -2   5  704.85    6.18
  -1  -2   4 1108.13    8.90
  -1  -2   4 1143.57    6.48
  -1  -2   4 1114.12    7.10
   1   2  -4 1067.44    4.61
  -1  -2   3 1286.22   10.12
  -1  -2   3 1318.58    6.66
  -1  -2   3 1338.54    9.03
   1   2  -3 1211.57    6.44
  -1  -2   2  432.63    3.35
  -1  -2   2  464.94    3.81
  -1  -2   2  436.11    2.42
  -1  -2   2  473.97    2.80
   1   2  -2  473.50    3.83
   1   2  -2  415.89    2.77
  -1  -2   1 1451.10   10.39
  -1  -2   1 1375.32    6.57
   1   2  -1 1410.54   11.26
   1   2  -1 1326.48    8.35
  -1  -2   0 1949.83   13.28
   1   2   0 1808.74   12.64
   1   2   0 1697.91   11.01
  -1  -2  -1  291.04    2.40
   1   2   1  280.57    2.39
   1   2   1  252.01    2.39
   1   2   1  255.87    1.89
   1   2   2 1980.41   10.83
   1   2   2 1557.63   10.25
   1   2   3  935.29    4.00
   1   2   3  758.07    4.31
   1   2   4 2021.60    9.20
   1   2   4 1537.26    7.87
   1   2   4 2068.78   16.27
   1   2   5 1262.62    4.99
   1   2   5 1049.03    4.38
   1   2   6 1364.56    8.76
   1   2   7  506.73    5.82
   1   2   8  572.84    6.67
   1   2   9  384.41    5.90
   1   2  10  181.42    4.50
   1   2  13  176.95    5.36
   1   2  14  201.11    5.97
   1   2  15  123.31    5.19
   1   2  16   86.32    4.79
  -1  -3  14   66.74    3.30
  -1  -3  14   58.34    4.00
  -1  -3  13   82.83    4.23
  -1  -3  12  102.76    3.38
  -1  -3  12   95.03    4.14
  -1  -3  11  160.82    3.85
  -1  -3  11  148.88    4.67
  -1  -3  10  161.73    3.68
  -1  -3  10  146.73    4.36
  -1  -3   9  411.09    5.32
  -1  -3   9  400.20    6.41
  -1  -3   8  229.79    3.90
  -1  -3   8  237.43    4.71
  -1  -3   7  645.47    6.00
  -1  -3   7  645.55    7.06
  -1  -3   6  210.48    3.37
  -1  -3   6  216.82    3.93
  -1  -3   5  433.10    4.50
  -1  -3   5  437.15    4.73
  -1  -3   5  432.17    5.02
   1   3  -5  404.24    3.64
  -1  -3   4  260.70    3.37
  -1  -3   4  263.38    3.58
  -1  -3   4  289.46    3.84
   1   3  -4  250.39    2.80
  -1  -3   3  480.42    4.30
  -1  -3   3  519.54    2.96
  -1  -3   3  508.08    4.65
   1   3  -3  503.81    4.68
   1   3  -3  469.41    3.65
  -1  -3   2  515.60    4.24
   1   3  -2  538.99    4.68
   1   3  -2  491.67    3.61
  -1  -3   1  690.13    4.68
   1   3  -1  674.04    5.03
   1   3  -1  606.73    3.86
  -1  -3   0 1176.85    5.83
   1   3   0 1140.34    8.02
   1   3   0 1105.45    7.85
  -1  -3  -1 1190.88    5.61
   1   3   1 1063.87    5.75
   1   3   1 1078.59    6.96
  -1  -3  -2 1432.23    5.82
   1   3   2 1511.89    6.22
   1   3   2 1327.77    6.11
   1   3   2 1330.68    5.74
   1   3   3  487.85    3.45
   1   3   3  409.89    3.24
   1   3   4  348.39    2.84
   1   3   4  282.86    2.58
   1   3   5  894.67    4.33
   1   3   5  726.13    3.84
   1   3   6  321.17    2.54
   1   3   6  258.19    2.21
   1   3   6  331.00    4.60
   1   3   7  383.99    2.65
   1   3   7  296.66    2.23
   1   3   7  384.88    5.33
   1   3   8  322.91    5.26
   1   3   9  527.95    7.05
   1   3  10  223.48    5.00
   1   3  11  216.97    5.29
   1   3  12  171.63    5.02
   1   3  13  159.25    5.19
   1   3  14  167.19    5.62
   1   3  15   76.21    4.41
   1   3  16   74.08    4.66
  -1  -4  13   93.73    3.77
  -1  -4  13   89.04    4.38
  -1  -4  12   68.02    3.25
  -1  -4  12   69.70    3.80
  -1  -4  11  167.51    4.29
  -1  -4  11  160.91    4.90
  -1  -4  10  122.04    3.54
  -1  -4  10  114.52    4.00
  -1  -4   9  146.75    3.70
  -1  -4   9  145.96    4.15
  -1  -4   8  128.17    3.35
  -1  -4   8  123.86    3.65
  -1  -4   7  396.91    5.27
  -1  -4   7  404.83    5.78
  -1  -4   6  227.85    3.90
  -1  -4   6  235.35    4.20
  -1  -4   5  116.39    2.77
  -1  -4   5  119.34    2.89
   1   4  -5  108.44    2.31
  -1  -4   4  464.25    4.98
  -1  -4   4  523.91    2.83
  -1  -4   4  490.80    5.14
   1   4  -4  441.56    4.24
  -1  -4   3  368.70    4.28
  -1  -4   3  403.79    3.29
  -1  -4   3  407.00    4.40
   1   4  -3  376.88    4.55
   1   4  -3  354.25    3.67
  -1  -4   2  324.83    3.86
   1   4  -2  308.40    4.02
   1   4  -2  300.72    3.28
  -1  -4   1  328.75    3.73
   1   4  -1  335.21    4.05
   1   4  -1  309.98    3.20
  -1  -4   0  893.28    5.84
   1   4   0  879.65    6.28
   1   4   0  817.74    4.90
  -1  -4  -1  918.45    5.68
   1   4   1  863.85    6.02
   1   4   1  855.93    5.95
  -1  -4  -2  644.80    4.57
   1   4   2  534.30    4.58
   1   4   2  558.88    3.19
   1   4   3  721.65    4.91
   1   4   3  624.22    4.78
   1   4   4  148.57    2.26
   1   4   4  128.88    2.18
   1   4   5  775.97    4.86
   1   4   5  656.10    4.58
   1   4   6  144.86    2.16
   1   4   6  121.80    2.00
   1   4   7  247.64    2.69
   1   4   7  205.14    2.45
   1   4   8  255.30    2.65
   1   4   8  211.23    2.41
   1   4   9  565.16    3.70
   1   4   9  468.15    3.37
   1   4   9  603.09    7.75
   1   4  10  229.98    2.32
   1   4  10  195.56    2.15
   1   4  10  235.56    5.31
   1   4  11  195.55    5.18
   1   4  12  236.04    5.95
   1   4  13  117.57    4.73
   1   4  14   65.64    4.05
  -1  -5  13  102.51    4.63
  -1  -5  12  138.07    4.48
  -1  -5  12  127.89    4.76
  -1  -5  11  149.32    4.37
  -1  -5  11  154.97    4.89
  -1  -5  10  117.20    3.80
  -1  -5  10  119.22    4.15
  -1  -5   9   83.63    3.20
  -1  -5   9   87.33    3.46
  -1  -5   8  162.64    4.02
  -1  -5   8  158.10    4.09
  -1  -5   7  133.26    3.54
  -1  -5   7  132.32    3.58
  -1  -5   6  256.65    4.55
  -1  -5   6  264.02    4.53
  -1  -5   5  112.74    3.04
  -1  -5   5  117.21    2.98
   1   5  -5  107.26    2.60
  -1  -5   4  637.94    6.47
  -1  -5   4  653.83    6.12
   1   5  -4  598.77    5.52
  -1  -5   3  330.61    4.53
  -1  -5   3  364.26    4.38
   1   5  -3  314.15    3.92
  -1  -5   2  380.12    4.66
   1   5  -2  356.45    4.81
   1   5  -2  344.21    3.94
  -1  -5   1  234.75    3.58
   1   5  -1  229.27    3.80
   1   5  -1  215.04    3.05
  -1  -5   0  247.72    3.54
   1   5   0  237.36    3.76
   1   5   0  226.96    2.97
  -1  -5  -1  206.66    3.13
   1   5   1  189.93    3.28
   1   5   1  190.79    2.56
  -1  -5  -2  124.59    2.38
   1   5   2  106.52    2.45
   1   5   2  117.67    1.79
   1   5   3  331.85    3.88
   1   5   3  277.44    3.72
   1   5   4  160.92    2.73
   1   5   4  136.27    2.60
   1   5   5  432.38    4.28
   1   5   5  345.84    3.95
   1   5   6  257.09    3.30
   1   5   6  211.84    3.07
   1   5   7  171.00    2.69
   1   5   7  146.47    2.55
   1   5   8  213.71    2.97
   1   5   8  176.67    2.70
   1   5   9  146.36    2.48
   1   5   9  116.33    2.21
   1   5  10  151.36    2.46
   1   5  10  130.26    2.28
   1   5  11  111.37    2.14
   1   5  11   96.75    1.95
   1   5  12  111.39    1.99
  -1  -6  12   59.29    3.59
  -1  -6  11   60.25    3.46
  -1  -6  11   56.21    3.44
  -1  -6  10  127.94    4.28
  -1  -6  10  131.38    4.38
  -1  -6   9   74.00    3.33
  -1  -6   9   76.47    3.38
  -1  -6   8  144.50    4.19
  -1  -6   8  145.50    4.05
  -1  -6   7  127.18    3.75
  -1  -6   7  135.37    3.71
  -1  -6   6  283.43    5.21
  -1  -6   6  280.70    4.78
  -1  -6   5  125.65    3.51
  -1  -6   5  132.06    3.24
   1   6  -5  119.35    3.02
  -1  -6   4  368.52    5.48
  -1  -6   4  378.41    4.89
   1   6  -4  338.69    4.63
  -1  -6   3  383.84    5.36
  -1  -6   3  394.88    4.73
   1   6  -3  350.12    4.55
  -1  -6   2  340.04    4.90
   1   6  -2  312.64    4.17
  -1  -6   1  410.03    5.18
   1   6  -1  399.34    5.48
   1   6  -1  365.03    4.31
  -1  -6   0  292.40    4.27
   1   6   0  287.59    4.59
   1   6   0  271.58    3.57
  -1  -6  -1  323.16    4.36
   1   6   1  296.38    4.55
   1   6   1  296.98    3.48
   1   6   2  349.05    4.81
   1   6   2  364.65    3.37
   1   6   3  331.87    4.62
   1   6   4  291.55    4.27
   1   6   5  370.21    4.69
   1   6   6  674.31    6.16
   1   6   7  167.79    3.14
   1   6   8  241.76    3.64
   1   6   9  181.09    3.14
   1   6  10  177.71    3.09
   1   6  11   51.53    1.85
   1   6  12  108.63    2.41
  -1  -7  11   43.12    3.29
  -1  -7  10   91.62    4.14
  -1  -7   9   65.76    3.49
  -1  -7   8  109.67    4.05
  -1  -7   7  177.10    4.80
  -1  -7   6  148.19    4.22
  -1  -7   6  151.63    3.79
  -1  -7   5   84.57    3.31
  -1  -7   5   90.83    2.91
   1   7  -5   77.70    2.79
  -1  -7   4   68.86    2.97
  -1  -7   4   68.22    2.48
   1   7  -4   55.32    2.35
  -1  -7   3  210.77    4.50
  -1  -7   3  208.59    3.65
   1   7  -3  184.63    3.71
  -1  -7   2   74.49    2.34
   1   7  -2   61.97    2.26
   1   7  -1  128.60    2.91
   1   7   0  157.74    3.84
   1   7   0  150.97    2.98
   1   7   1  298.00    5.04
   1   7   1  295.80    3.77
   1   7   2  232.55    4.42
   1   7   2  253.72    3.09
   1   7   3  124.83    3.31
   1   7   4  199.90    4.01
   1   7   5  145.46    3.42
   1   7   6  200.67    3.89
   1   7   7   67.85    2.45
   1   7   8  185.90    3.69
   1   7   9  145.20    3.28
   1   7  10  108.99    2.86
   1   7  11  104.06    2.81
   1   7  12   95.67    2.65
   1   7  13   92.15    2.54
  -1  -8  10   97.92    4.48
   1   8  -6  126.43    3.84
   1   8  -5  173.90    4.21
   1   8  -4  152.27    3.81
   1   8  -3  271.19    4.78
   1   8  -2  120.77    3.21
   1   8  -1  260.64    4.32
   1   8   0  303.61    4.39
   1   8   1  286.70    5.51
   1   8   1  281.66    3.96
   1   8   2  349.49    5.92
   1   8   2  336.06    3.68
   1   8   3  315.19    5.52
   1   8   4  218.92    4.64
   1   8   5  139.91    3.75
   1   8   6  181.69    4.16
   1   8   7  135.20    3.61
   1   8   8   85.37    2.99
   1   8   9  179.16    4.02
   1   8  10  127.99    3.43
   1   8  11  139.78    3.54
   1   8  12   76.88    2.78
   1   8  13   77.28    2.74
   1   9  -6   81.79    3.45
   1   9  -5  105.64    3.67
   1   9  -4  104.70    3.52
   1   9  -3  179.89    4.26
   1   9  -2  215.41    4.43
   1   9  -1  159.18    3.70
   1   9   0  161.66    3.50
   1   9   1  148.55    3.11
   1   9   2  216.42    5.16
   1   9   2  220.83    3.04
   1   9   3  158.27    4.42
   1   9   4  139.83    4.19
   1   9   5  225.09    5.10
   1   9   6  198.46    4.78
   1   9   7  171.04    4.43
   1   9   8  104.01    3.62
   1   9   9  180.44    4.44
   1   9  10  111.70    3.64
   1   9  11  116.76    3.68
   1   9  12   82.70    3.22
   1  10  -7   71.38    3.62
   1  10  -6   91.15    3.83
   1  10  -5   57.68    3.13
   1  10  -4  113.68    3.87
   1  10  -3  134.92    3.99
   1  10  -2  158.21    4.09
   1  10  -1   83.21    2.98
   1  10   0  160.65    3.68
   1  10   1  105.63    2.77
   1  10   4   98.36    4.00
   1  10   5  143.02    4.52
   1  10   6  141.13    4.52
   1  10   7  129.18    4.30
   1  10   8   90.15    3.69
   1  10   9  106.28    3.98
   1  10  10   61.92    3.23
   1  10  11   39.26    2.79
   1  11  -4   66.86    3.36
   1  11  -3   46.88    2.86
   1  11  -2   64.83    3.11
   1  11  -1   59.21    2.84
   1  11   0   98.54    3.09
   1  11   1   88.24    2.42
   1  11   6   81.54    3.99
   1  11   7   77.95    3.85
   1  11   8   67.24    3.62
   1  11   9   53.23    3.42
   1  12   0   62.35    2.46
   1  12   7   39.08    3.38
  -2  11  -1   59.75    2.56
  -2  10   8   50.19    3.62
  -2  10   7   65.16    3.82
  -2  10   6   76.08    4.04
  -2  10   0  149.38    3.07
  -2  10  -1  119.87    3.34
  -2  10  -2  106.86    3.49
  -2  10  -3   90.31    3.46
  -2  10  -4   99.32    3.80
  -2   9   9   72.06    3.72
  -2   9   8   73.33    3.67
  -2   9   7   89.50    3.97
  -2   9   6   61.16    3.48
  -2   9   5   74.23    3.74
  -2   9   4  104.74    4.31
  -2   9   0  154.34    3.30
  -2   9  -1   70.98    2.72
  -2   9  -2   63.09    2.79
  -2   9  -3   87.64    3.32
  -2   9  -4   62.11    3.06
  -2   9  -5   61.39    3.15
  -2   9  -6   54.35    3.13
  -2   9  -7  101.16    4.05
  -2   8  11   52.97    3.11
  -2   8  10   60.35    3.20
  -2   8   9  118.76    4.14
  -2   8   8  128.77    4.29
  -2   8   8  141.63    4.68
  -2   8   7  101.17    3.84
  -2   8   7  127.24    4.28
  -2   8   6  201.80    5.16
  -2   8   6  232.57    5.20
  -2   8   5  209.29    5.21
  -2   8   5  248.28    5.12
  -2   8   4  199.42    5.13
  -2   8   3  133.00    4.38
  -2   8   2  187.02    5.04
  -2   8   1  141.84    2.65
  -2   8   0  187.72    3.55
  -2   8  -1  148.27    3.51
  -2   8  -2  142.39    3.64
  -2   8  -3  210.00    4.55
  -2   8  -4  139.15    3.96
  -2   8  -5  108.18    3.71
  -2   8  -6   88.92    3.57
  -2   8  -7  103.99    3.91
  -2   7  12   46.50    2.72
  -2   7  11   52.35    2.80
  -2   7  10   71.12    3.10
  -2   7   9   84.07    3.34
  -2   7   9   90.04    4.00
  -2   7   8   75.66    3.23
  -2   7   8   91.69    3.86
  -2   7   7   87.68    3.43
  -2   7   7  102.64    3.76
  -2   7   6  145.56    4.15
  -2   7   6  160.83    4.27
  -2   7   5  109.49    3.69
  -2   7   5  123.22    3.69
  -2   7   4  168.68    4.45
  -2   7   4  182.09    4.14
  -2   7   3  126.17    3.94
  -2   7   3  137.74    3.54
  -2   7   2  129.31    4.00
  -2   7   2  141.09    3.48
  -2   7   1  103.53    3.62
  -2   7   1  108.87    2.36
  -2   7   1  106.36    3.05
  -2   7   0  152.14    3.13
  -2   7   0  163.83    3.59
  -2   7  -1  140.03    3.25
  -2   7  -2  147.62    3.52
  -2   7  -3  220.33    4.39
  -2   7  -4  188.45    4.25
  -2   7  -5  143.09    3.92
  -2   7  -6  143.71    4.04
   2  -7  10   98.66    4.38
   2  -7  11   42.32    3.41
  -2   6  13   48.77    2.49
  -2   6  12   78.49    2.92
  -2   6  11  109.02    3.35
  -2   6  10   80.45    3.06
  -2   6   9  174.56    4.15
  -2   6   9  177.12    5.03
  -2   6   8  151.85    3.94
  -2   6   8  162.87    4.61
  -2   6   7  100.86    3.33
  -2   6   7  109.09    3.71
  -2   6   6  108.33    3.43
  -2   6   6  116.55    3.60
  -2   6   5  126.12    3.55
  -2   6   5  135.90    3.66
  -2   6   4  131.80    3.63
  -2   6   4  144.33    3.62
  -2   6   3  198.75    4.36
  -2   6   3  223.33    4.20
  -2   6   2  171.42    4.16
  -2   6   2  183.43    3.73
  -2   6   1  225.23    4.66
  -2   6   1  240.87    3.21
  -2   6   1  251.70    4.21
  -2   6   0  270.34    5.10
  -2   6   0  268.42    3.81
  -2   6   0  282.08    4.43
  -2   6  -1  252.96    4.99
  -2   6  -1  248.54    3.95
  -2   6  -1  273.31    4.41
  -2   6  -2   88.14    2.64
  -2   6  -3  155.16    3.52
  -2   6  -4  198.03    4.06
   2  -6   4  209.55    4.71
  -2   6  -5   80.89    2.89
   2  -6   5   83.08    3.23
  -2   6  -6  100.36    3.26
   2  -6   6  109.56    3.71
   2  -6   7  105.78    3.85
   2  -6   8  153.35    4.52
   2  -6   9   51.19    3.16
   2  -6  10   75.99    3.70
   2  -6  11   66.02    3.69
   2  -6  12   67.52    3.74
  -2   5  14   47.86    4.15
  -2   5  13   89.01    2.80
  -2   5  13   98.22    4.83
  -2   5  12   87.08    2.86
  -2   5  12   94.27    4.46
  -2   5  11   91.40    2.99
  -2   5  11  107.63    4.45
  -2   5  10   87.76    2.90
  -2   5  10   97.38    4.02
  -2   5  10   86.78    3.89
  -2   5   9  181.12    3.95
  -2   5   9  198.64    4.98
  -2   5   9  188.74    5.02
  -2   5   8  163.49    3.79
  -2   5   8  185.53    4.51
  -2   5   8  174.26    4.58
  -2   5   7  148.29    3.55
  -2   5   7  175.24    4.07
  -2   5   7  157.44    4.14
  -2   5   6  133.96    3.45
  -2   5   6  162.58    3.62
  -2   5   6  142.20    3.78
  -2   5   5  228.24    4.32
  -2   5   5  271.68    4.11
  -2   5   5  227.77    4.40
  -2   5   4  177.41    3.85
  -2   5   4  226.40    3.36
  -2   5   4  194.64    3.92
  -2   5   3  279.72    4.71
  -2   5   3  297.26    4.56
  -2   5   2  184.39    3.94
  -2   5   2  199.91    2.14
  -2   5   2  188.92    1.99
  -2   5   2  195.79    3.67
  -2   5   1  449.82    5.94
  -2   5   1  469.24    4.13
  -2   5   1  495.84    5.54
  -2   5   0  434.21    5.87
  -2   5   0  435.05    4.49
  -2   5   0  465.72    5.38
  -2   5  -1  341.68    5.27
  -2   5  -1  349.70    4.33
   2  -5   1  350.96    5.06
  -2   5  -2  189.30    4.02
  -2   5  -2  198.13    3.48
   2  -5   2  192.58    3.91
  -2   5  -3  291.25    4.34
   2  -5   3  297.31    4.91
  -2   5  -4  213.68    3.91
   2  -5   4  212.62    4.32
  -2   5  -5  110.43    3.03
   2  -5   5  111.08    3.34
  -2   5  -6  209.01    4.13
   2  -5   6  219.65    4.63
   2  -5   7  242.62    5.04
   2  -5   8  168.49    4.41
   2  -5   9  215.64    5.06
   2  -5  10  144.09    4.38
   2  -5  11  107.08    4.00
   2  -5  12   51.52    3.17
   2  -5  13   96.07    4.13
  -2   4  13  109.06    2.86
  -2   4  12  142.52    3.28
  -2   4  12  150.69    5.26
  -2   4  11   99.62    2.91
  -2   4  11  116.16    4.51
  -2   4  10  104.92    2.97
  -2   4  10  112.05    4.15
  -2   4  10  106.85    4.07
  -2   4   9  158.93    3.51
  -2   4   9  178.32    4.67
  -2   4   9  170.43    4.68
  -2   4   8  214.82    3.94
  -2   4   8  249.15    5.07
  -2   4   8  221.61    4.92
  -2   4   7  189.01    3.75
  -2   4   7  209.83    4.36
  -2   4   7  189.40    4.34
  -2   4   6  390.44    5.16
  -2   4   6  458.88    5.70
  -2   4   6  401.64    5.77
  -2   4   5  492.94    5.75
  -2   4   5  576.72    5.79
  -2   4   5  497.58    6.09
  -2   4   4  407.98    5.22
  -2   4   4  473.71    4.73
  -2   4   4  414.18    5.32
  -2   4   3  522.01    5.87
  -2   4   3  613.79    4.64
  -2   4   3  532.70    5.76
  -2   4   2  469.27    5.58
  -2   4   2  489.84    2.97
  -2   4   2  466.03    2.76
  -2   4   2  571.60    3.65
  -2   4   2  495.46    5.40
  -2   4   1  269.15    4.27
  -2   4   1  303.93    3.35
  -2   4   1  278.70    2.98
  -2   4   1  301.68    4.21
   2  -4  -1  280.55    3.92
  -2   4   0  400.41    5.17
  -2   4   0  400.02    3.99
   2  -4   0  403.84    4.80
  -2   4  -1  547.31    6.04
  -2   4  -1  537.64    4.93
   2  -4   1  556.62    5.78
  -2   4  -2  336.13    4.79
  -2   4  -2  367.31    4.33
   2  -4   2  350.67    4.80
  -2   4  -3  352.83    4.96
  -2   4  -3  352.19    4.40
   2  -4   3  340.09    4.83
  -2   4  -4  544.42    5.62
   2  -4   4  549.74    6.25
  -2   4  -5  391.21    4.94
   2  -4   5  394.99    5.51
   2  -4   5  495.42    4.10
  -2   4  -6  214.01    3.84
   2  -4   6  217.24    4.25
   2  -4   6  269.02    3.54
   2  -4   7  285.20    4.96
   2  -4   7  354.69    4.47
   2  -4   8  189.58    4.23
   2  -4   8  235.26    4.07
   2  -4   9  262.77    5.10
   2  -4  10  110.81    3.61
   2  -4  11  146.13    4.17
   2  -4  12   93.94    3.66
   2  -4  13  129.76    4.26
  -2   3  14   66.37    4.33
  -2   3  13   68.74    2.42
  -2   3  13   68.10    4.14
  -2   3  12  137.67    3.18
  -2   3  12  138.84    5.04
  -2   3  11  108.74    2.89
  -2   3  11  117.76    4.47
  -2   3  10  139.38    3.19
  -2   3  10  143.66    3.23
  -2   3  10  150.48    4.61
  -2   3   9  100.68    2.78
  -2   3   9  115.45    3.88
  -2   3   9  113.80    3.88
  -2   3   8  274.48    4.20
  -2   3   8  299.31    5.46
  -2   3   8  270.44    5.24
  -2   3   7  195.00    3.53
  -2   3   7  205.87    3.62
  -2   3   7  216.44    4.35
  -2   3   7  197.65    4.30
  -2   3   6  293.80    4.21
  -2   3   6  340.16    4.34
  -2   3   6  302.14    4.26
  -2   3   6  340.84    4.95
  -2   3   6  303.57    4.89
  -2   3   5  304.61    4.01
  -2   3   5  282.75    4.07
  -2   3   5  316.16    4.35
  -2   3   5  280.32    4.45
  -2   3   4  676.65    5.77
  -2   3   4  656.36    6.06
  -2   3   4  729.72    5.83
  -2   3   4  632.76    6.22
  -2   3   3  529.45    5.06
  -2   3   3  537.94    5.47
  -2   3   3  585.50    4.61
  -2   3   3  538.74    5.53
  -2   3   2  370.07    4.25
  -2   3   2  358.05    4.47
  -2   3   2  355.60    2.14
  -2   3   2  399.59    3.26
  -2   3   2  357.00    4.40
  -2   3   1  172.37    3.16
  -2   3   1  185.31    2.41
  -2   3   1  174.36    2.20
  -2   3   1  197.47    1.82
  -2   3   1  185.69    3.22
   2  -3  -1  176.17    2.90
  -2   3   0  812.97    6.66
  -2   3   0  822.06    5.22
   2  -3   0  829.40    6.27
  -2   3  -1  360.54    4.49
  -2   3  -1  369.68    3.81
   2  -3   1  362.37    4.34
  -2   3  -2  293.75    4.09
  -2   3  -2  303.24    3.65
   2  -3   2  289.06    3.99
  -2   3  -3  582.03    5.72
  -2   3  -3  608.13    5.29
   2  -3   3  568.45    5.68
  -2   3  -4  985.40    7.40
  -2   3  -4 1025.74    7.04
   2  -3   4  993.65    7.67
  -2   3  -5  525.96    5.23
   2  -3   5  519.24    5.77
   2  -3   5  655.80    4.90
  -2   3  -6  351.10    4.43
   2  -3   6  340.04    4.84
   2  -3   6  420.19    4.45
   2  -3   7  402.03    5.39
   2  -3   7  475.88    5.20
   2  -3   8  210.29    4.11
   2  -3   8  252.43    4.22
   2  -3   9  184.99    3.99
   2  -3   9  223.74    4.36
   2  -3  10  143.90    3.73
   2  -3  10  170.41    4.16
   2  -3  11  132.77    3.66
   2  -3  11  162.11    4.37
   2  -3  12  181.38    4.41
   2  -3  12  199.24    5.10
   2  -3  13  159.81    4.27
   2  -3  13  176.84    5.12
   2  -3  14  117.13    3.92
  -2   2  14   66.54    2.36
  -2   2  14   68.65    4.36
  -2   2  13   83.25    2.62
  -2   2  13   88.24    4.52
  -2   2  12  215.03    3.83
  -2   2  12  217.78    6.06
  -2   2  11  179.66    3.54
  -2   2  11  185.77    5.36
  -2   2  10  204.87    3.67
  -2   2  10  205.75    5.24
  -2   2   9  374.30    4.73
  -2   2   9  393.08    6.59
  -2   2   9  362.79    6.23
  -2   2   8  564.42    5.60
  -2   2   8  541.82    5.45
  -2   2   8  602.49    7.54
  -2   2   8  545.70    7.10
  -2   2   7  276.30    3.93
  -2   2   7  271.36    3.81
  -2   2   7  298.40    5.03
  -2   2   7  265.59    4.72
  -2   2   6  297.66    3.97
  -2   2   6  312.54    3.96
  -2   2   6  330.95    4.88
  -2   2   6  303.14    4.73
  -2   2   5  453.55    4.77
  -2   2   5  495.73    4.78
  -2   2   5  509.05    5.47
  -2   2   5  485.50    5.57
  -2   2   4  387.77    4.38
  -2   2   4  409.66    4.27
  -2   2   4  437.96    4.61
  -2   2   4  397.37    4.76
  -2   2   3  307.01    3.87
  -2   2   3  344.63    3.86
  -2   2   3  356.19    3.70
  -2   2   3  351.78    4.29
   2  -2  -3  315.25    3.03
  -2   2   2  752.82    5.90
  -2   2   2  779.61    5.68
  -2   2   2  799.46    6.09
  -2   2   2  845.23    4.91
  -2   2   2  787.06    6.09
  -2   2   1  668.84    5.56
  -2   2   1  683.96    4.03
  -2   2   1  649.21    3.74
  -2   2   1  682.81    3.74
  -2   2   1  674.73    5.55
   2  -2  -1  618.79    4.85
  -2   2   0  881.96    6.34
  -2   2   0  892.98    5.04
  -2   2   0  940.51    3.58
   2  -2   0  829.42    5.82
  -2   2  -1  774.33    5.94
  -2   2  -1  814.84    5.20
   2  -2   1  782.83    5.82
  -2   2  -2  484.39    4.72
  -2   2  -2  514.18    4.35
   2  -2   2  470.73    4.67
  -2   2  -3  313.86    3.80
  -2   2  -3  339.79    3.68
   2  -2   3  308.77    3.90
  -2   2  -4  581.78    5.12
  -2   2  -4  599.95    4.95
   2  -2   4  545.62    5.26
  -2   2  -5  274.34    3.48
   2  -2   5  268.91    3.86
   2  -2   5  295.23    3.93
   2  -2   5  330.36    3.66
  -2   2  -6  230.09    3.26
   2  -2   6  226.63    3.66
   2  -2   6  249.44    3.73
   2  -2   6  276.86    3.76
   2  -2   7  273.56    4.11
   2  -2   7  322.76    4.39
   2  -2   8  249.15    4.08
   2  -2   8  284.62    4.51
   2  -2   9  124.75    3.05
   2  -2   9  142.03    3.60
   2  -2  10  200.98    3.92
   2  -2  10  236.78    4.79
   2  -2  11   84.75    2.85
   2  -2  11   97.37    3.57
   2  -2  12  127.70    3.43
   2  -2  12  141.90    4.41
   2  -2  13   86.55    3.08
   2  -2  13   99.07    4.07
   2  -2  14  124.67    3.65
   2  -2  14  142.29    4.98
   2  -2  15   38.43    2.58
   2  -2  15   47.42    3.68
  -2   1  14   79.58    2.70
  -2   1  14   77.78    4.54
  -2   1  13   90.70    2.83
  -2   1  13   84.95    4.44
  -2   1  12  123.60    3.16
  -2   1  12  120.74    4.74
  -2   1  11  152.52    3.37
  -2   1  11  149.79    4.87
  -2   1  10  159.92    3.31
  -2   1  10  149.70    4.56
  -2   1   9  319.41    4.34
  -2   1   9  280.57    5.63
  -2   1   9  276.11    5.39
  -2   1   8  271.26    3.87
  -2   1   8  258.91    5.08
  -2   1   8  256.72    4.86
  -2   1   7  462.59    4.82
  -2   1   7  392.69    4.47
  -2   1   7  441.65    6.06
  -2   1   7  408.41    5.64
  -2   1   6  284.83    3.71
  -2   1   6  257.24    3.56
  -2   1   6  274.17    4.49
  -2   1   6  263.62    4.32
  -2   1   5  496.39    4.70
  -2   1   5  446.59    4.45
  -2   1   5  495.85    5.46
  -2   1   5  458.22    5.22
  -2   1   4  234.00    3.22
  -2   1   4  224.56    3.13
  -2   1   4  244.33    3.56
  -2   1   4  225.18    3.48
  -2   1   3  916.35    6.09
  -2   1   3  896.06    5.93
  -2   1   3  952.33    6.19
   2  -1  -3  862.51    4.26
  -2   1   2  642.67    5.07
  -2   1   2  657.67    5.01
  -2   1   2  688.15    4.72
  -2   1   2  667.35    5.27
   2  -1  -2  589.31    3.80
  -2   1   1  714.72    5.29
  -2   1   1  769.30    3.84
  -2   1   1  761.96    3.79
   2  -1  -1  723.54    5.00
  -2   1   0 1347.48   10.77
  -2   1   0 1499.90   10.13
   2  -1   0 1372.50    7.07
  -2   1  -1 2541.42   17.01
  -2   1  -1 2444.66   14.96
   2  -1   1 2235.41   15.39
  -2   1  -2  727.34    5.20
  -2   1  -2  802.83    5.03
   2  -1   2  689.57    5.24
  -2   1  -3  602.10    4.68
  -2   1  -3  637.63    4.56
   2  -1   3  580.47    4.90
  -2   1  -4  688.84    4.76
   2  -1   4  608.22    5.11
   2  -1   4  720.20    5.34
   2  -1   5  455.75    4.55
   2  -1   5  504.80    4.57
   2  -1   5  571.42    4.92
   2  -1   6  342.53    4.06
   2  -1   6  371.80    4.03
   2  -1   6  404.30    4.58
   2  -1   7  369.37    4.34
   2  -1   7  406.90    4.36
   2  -1   7  431.27    5.12
   2  -1   8  449.58    4.88
   2  -1   8  486.33    4.89
   2  -1   8  536.84    6.14
   2  -1   9  420.74    4.88
   2  -1   9  485.41    6.28
   2  -1  10  418.81    4.98
   2  -1  10  472.23    6.65
   2  -1  11  135.68    3.10
   2  -1  11  154.62    4.29
   2  -1  12  176.11    3.56
   2  -1  13  152.46    3.47
   2  -1  13  166.26    5.04
   2  -1  14   76.93    2.77
   2  -1  14   83.34    4.11
   2  -1  15   40.21    2.32
   2  -1  15   43.72    3.59
  -2   0  14  109.64    3.31
  -2   0  14   96.73    4.86
  -2   0  13   83.63    2.97
  -2   0  13   74.88    4.22
  -2   0  12  167.19    3.74
  -2   0  12  144.13    5.08
  -2   0  11  226.24    4.08
  -2   0  11  188.29    5.36
  -2   0  10   54.69    2.25
  -2   0  10   51.63    2.99
  -2   0   9  135.19    2.98
  -2   0   9  119.40    3.89
  -2   0   8  158.95    3.05
  -2   0   8  142.25    2.96
  -2   0   8  135.77    3.85
  -2   0   8  138.62    3.67
  -2   0   7  282.40    3.77
  -2   0   7  249.30    3.67
  -2   0   7  257.35    4.76
  -2   0   7  260.72    4.51
  -2   0   6  108.41    2.35
  -2   0   6   95.72    2.31
  -2   0   6  103.07    2.92
  -2   0   6  100.19    2.73
  -2   0   5  513.70    4.61
  -2   0   5  422.73    4.40
  -2   0   5  458.81    5.35
  -2   0   5  426.53    4.85
  -2   0   4  363.73    3.79
  -2   0   4  309.47    3.68
  -2   0   4  339.74    4.27
  -2   0   3  628.79    4.81
  -2   0   3  527.31    4.60
  -2   0   3  622.23    5.24
  -2   0   3  546.75    4.75
   2   0  -3  539.60    3.17
  -2   0   2  210.52    2.78
  -2   0   2  188.90    2.75
  -2   0   2  229.38    2.97
  -2   0   2  194.47    2.74
   2   0  -2  188.13    2.03
  -2   0   1  110.29    2.07
  -2   0   1  106.07    1.41
  -2   0   1  108.37    1.53
  -2   0   1  100.63    1.98
   2   0  -1   94.15    1.88
   2   0  -1   98.36    1.58
  -2   0   0  117.91    2.08
  -2   0   0  122.19    1.84
   2   0   0  101.11    1.98
  -2   0  -1  599.08    4.46
   2   0   1  550.10    4.45
  -2   0  -2   29.71    1.14
  -2   0  -2   32.90    1.18
   2   0   2   33.86    1.26
  -2   0  -3   99.55    1.79
   2   0   3  104.49    1.97
   2   0   3   86.77    1.87
   2   0   4  549.17    4.27
   2   0   4  446.49    4.10
   2   0   5  470.20    4.00
   2   0   5  418.52    4.02
   2   0   5  504.19    4.15
   2   0   6   57.54    1.70
   2   0   6   66.15    1.71
   2   0   6   74.33    2.24
   2   0   7  236.42    3.19
   2   0   7  276.90    3.29
   2   0   7  295.93    4.40
   2   0   8  265.01    3.47
   2   0   8  293.00    3.50
   2   0   8  311.56    4.84
   2   0   9  194.99    3.08
   2   0   9  210.04    3.10
   2   0   9  228.75    4.51
   2   0  10  144.26    2.78
   2   0  10  162.32    2.93
   2   0  10  159.39    4.11
   2   0  11  182.08    3.18
   2   0  11  207.02    4.90
   2   0  12  112.51    2.68
   2   0  12  122.86    4.20
   2   0  13  119.86    2.79
   2   0  13  132.33    4.60
   2   0  14   62.72    2.28
   2   0  14   63.59    3.77
   2   0  15   77.46    2.53
   2   0  15   76.05    4.23
   2   0  16   53.79    2.29
  -2  -1  14   78.14    3.21
  -2  -1  14   69.93    4.35
  -2  -1  13   93.86    3.30
  -2  -1  13   80.71    4.31
  -2  -1  12  155.03    3.82
  -2  -1  12  132.64    4.94
  -2  -1  11  202.05    4.10
  -2  -1  11  173.80    5.21
  -2  -1  10  113.13    3.05
  -2  -1  10   96.53    3.82
  -2  -1   9  204.45    3.71
  -2  -1   9  183.46    4.71
  -2  -1   8  311.31    4.25
  -2  -1   8  268.21    5.24
  -2  -1   7  260.89    3.73
  -2  -1   7  236.64    4.63
  -2  -1   7  240.94    4.27
  -2  -1   6  341.38    4.03
  -2  -1   6  308.70    4.06
  -2  -1   6  305.09    4.83
  -2  -1   6  301.80    4.37
  -2  -1   5  501.36    4.62
  -2  -1   5  463.50    4.77
  -2  -1   5  433.14    5.33
  -2  -1   5  435.36    4.77
  -2  -1   4 1000.01    6.22
  -2  -1   4  913.30    6.40
  -2  -1   4  885.99    6.99
  -2  -1   4  885.28    6.17
   2   1  -4  836.01    4.12
  -2  -1   3  680.44    4.98
  -2  -1   3  592.44    5.03
  -2  -1   3  606.10    5.39
  -2  -1   3  587.83    4.65
   2   1  -3  543.19    3.36
  -2  -1   2 1061.61    7.95
  -2  -1   2  880.57    5.92
  -2  -1   2 1030.94    5.26
  -2  -1   2  869.95    5.23
   2   1  -2  869.07    5.70
   2   1  -2  863.53    5.42
  -2  -1   1  322.19    3.31
  -2  -1   1  303.24    2.71
  -2  -1   1  266.81    2.83
   2   1  -1  267.25    3.19
   2   1  -1  261.35    2.44
  -2  -1   0  574.66    4.30
   2   1   0  491.35    4.24
   2   1   0  471.00    3.31
  -2  -1  -1  479.17    3.88
   2   1   1  420.82    3.87
  -2  -1  -2  277.99    2.91
   2   1   2  289.28    3.04
   2   1   3  565.00    4.18
   2   1   3  474.04    3.98
   2   1   4  978.79    5.41
   2   1   4  829.44    5.22
   2   1   5  866.20    5.09
   2   1   5  749.59    4.98
   2   1   6  554.29    4.11
   2   1   6  447.25    3.91
   2   1   7  558.41    4.19
   2   1   7  470.74    4.08
   2   1   7  594.33    6.30
   2   1   8  186.01    2.56
   2   1   8  166.96    2.56
   2   1   8  200.54    4.08
   2   1   9  171.89    2.56
   2   1   9  166.92    2.63
   2   1   9  194.35    4.24
   2   1  10  174.92    2.68
   2   1  10  157.14    2.59
   2   1  10  184.45    4.46
   2   1  11  133.20    2.49
   2   1  11  117.48    2.36
   2   1  11  136.72    4.17
   2   1  12   62.91    1.90
   2   1  12   69.64    3.36
   2   1  13  213.03    3.11
   2   1  13  224.11    5.81
   2   1  14  111.47    2.40
   2   1  14  121.34    4.76
   2   1  15   74.53    2.07
   2   1  15   73.86    4.24
  -2  -2  14   50.22    3.04
  -2  -2  14   45.10    3.86
  -2  -2  13   61.87    3.06
  -2  -2  13   48.69    3.71
  -2  -2  12   66.68    2.95
  -2  -2  12   54.63    3.59
  -2  -2  11  152.30    3.84
  -2  -2  11  138.06    4.75
  -2  -2  10  152.01    3.62
  -2  -2  10  135.21    4.42
  -2  -2   9  170.31    3.61
  -2  -2   9  149.65    4.37
  -2  -2   8  416.55    5.16
  -2  -2   8  380.95    6.23
  -2  -2   7  210.43    3.59
  -2  -2   7  196.95    4.31
  -2  -2   6  391.71    4.57
  -2  -2   6  398.15    5.61
  -2  -2   6  418.77    5.02
  -2  -2   5  152.03    2.80
  -2  -2   5  157.14    3.03
  -2  -2   5  141.73    3.26
  -2  -2   5  148.34    2.84
   2   2  -5  132.48    2.03
  -2  -2   4  373.52    4.07
  -2  -2   4  378.87    4.41
  -2  -2   4  361.84    4.69
  -2  -2   4  347.46    3.78
   2   2  -4  320.73    2.97
  -2  -2   3  133.38    2.43
  -2  -2   3  127.64    2.54
  -2  -2   3  132.37    2.78
  -2  -2   3  125.98    2.16
   2   2  -3  108.44    1.76
  -2  -2   2 1000.61    6.09
  -2  -2   2  873.73    3.85
  -2  -2   2  879.06    4.85
   2   2  -2  914.73    6.28
   2   2  -2  805.43    4.51
  -2  -2   1  201.20    2.72
  -2  -2   1  196.06    2.20
   2   2  -1  180.22    2.81
   2   2  -1  162.68    2.07
  -2  -2   0  556.21    4.32
   2   2   0  483.82    4.37
   2   2   0  441.16    3.31
  -2  -2  -1 1359.15    8.32
   2   2   1 1211.29    6.67
   2   2   1 1088.54    6.19
  -2  -2  -2 1068.14    5.67
   2   2   2 1097.37    5.91
   2   2   2  919.36    5.64
   2   2   3  127.91    2.10
   2   2   3  105.41    1.93
   2   2   4  710.06    4.70
   2   2   4  597.78    4.34
   2   2   5  822.13    5.00
   2   2   5  735.31    4.73
   2   2   6  455.31    3.73
   2   2   6  421.09    3.60
   2   2   7  276.63    2.95
   2   2   7  251.56    2.84
   2   2   8  470.48    3.80
   2   2   8  407.30    3.62
   2   2   9  324.36    3.23
   2   2   9  272.40    3.03
   2   2   9  355.68    5.79
   2   2  10  255.55    2.93
   2   2  10  224.95    2.83
   2   2  10  272.12    5.42
   2   2  11  173.02    2.55
   2   2  11  153.86    2.40
   2   2  11  175.41    4.73
   2   2  12  180.13    2.64
   2   2  12  157.04    2.38
   2   2  12  179.06    5.06
   2   2  13  232.59    2.94
   2   2  13  216.06    5.80
   2   2  14  173.84    5.55
  -2  -3  13   69.14    3.34
  -2  -3  13   59.96    4.00
  -2  -3  12   85.79    3.46
  -2  -3  12   73.47    4.04
  -2  -3  11  180.18    4.35
  -2  -3  11  155.53    5.06
  -2  -3  10  160.61    3.97
  -2  -3  10  144.46    4.63
  -2  -3   9  111.45    3.19
  -2  -3   9  103.20    3.79
  -2  -3   8  385.75    5.32
  -2  -3   8  346.10    6.07
  -2  -3   7  345.43    4.83
  -2  -3   7  315.63    5.49
  -2  -3   6  370.06    4.77
  -2  -3   6  346.52    5.41
  -2  -3   5  204.04    3.46
  -2  -3   5  200.26    3.93
   2   3  -5  178.86    2.66
  -2  -3   4  397.81    4.51
  -2  -3   4  395.85    5.11
  -2  -3   4  387.39    3.87
   2   3  -4  343.32    3.49
  -2  -3   3  490.47    4.79
  -2  -3   3  484.49    2.86
  -2  -3   3  484.47    3.81
   2   3  -3  488.08    5.10
   2   3  -3  438.13    3.81
  -2  -3   2  475.29    4.57
  -2  -3   2  431.41    3.22
  -2  -3   2  425.11    3.12
   2   3  -2  436.83    4.72
   2   3  -2  399.92    3.57
  -2  -3   1  578.66    4.85
  -2  -3   1  516.79    3.03
   2   3  -1  514.38    4.97
   2   3  -1  476.55    3.79
  -2  -3   0 1095.26    6.43
   2   3   0  975.46    6.60
   2   3   0  924.79    5.14
  -2  -3  -1 2157.05   12.02
   2   3   1 1944.15   14.26
   2   3   1 1753.94    9.28
  -2  -3  -2 1047.02    5.93
   2   3   2  904.53    5.96
   2   3   2  844.55    4.24
   2   3   3  580.34    4.52
   2   3   3  480.39    4.21
   2   3   4 1024.14    5.93
   2   3   4  822.42    5.33
   2   3   5  472.18    4.02
   2   3   5  377.41    3.55
   2   3   6  330.88    3.37
   2   3   6  274.59    3.00
   2   3   7  307.29    3.24
   2   3   7  254.53    2.86
   2   3   8  552.20    4.22
   2   3   8  473.88    3.84
   2   3   9  361.29    3.43
   2   3   9  307.89    3.15
   2   3  10  514.04    4.03
   2   3  10  397.14    3.56
   2   3  11  302.57    3.12
   2   3  11  232.27    2.77
  -2  -4  13   91.92    3.97
  -2  -4  13   79.52    4.43
  -2  -4  12  162.36    4.66
  -2  -4  12  146.92    5.28
  -2  -4  11  177.69    4.65
  -2  -4  11  157.22    5.14
  -2  -4  10  130.26    3.85
  -2  -4  10  122.53    4.42
  -2  -4   9   99.60    3.30
  -2  -4   9   88.36    3.65
  -2  -4   8  221.43    4.44
  -2  -4   8  207.32    4.91
  -2  -4   7  210.89    4.16
  -2  -4   7  199.64    4.56
  -2  -4   6  130.66    3.18
  -2  -4   6  129.68    3.58
  -2  -4   5  492.68    5.66
  -2  -4   5  482.36    6.14
   2   4  -5  440.07    4.55
  -2  -4   4  309.15    4.36
  -2  -4   4  320.31    4.81
   2   4  -4  273.69    3.51
  -2  -4   3  610.76    5.81
  -2  -4   3  621.77    4.01
   2   4  -3  548.56    4.75
  -2  -4   2  372.32    4.42
   2   4  -2  352.80    4.62
   2   4  -2  326.91    3.59
  -2  -4   1  828.81    6.30
  -2  -4   1  791.67    2.93
   2   4  -1  758.40    6.54
   2   4  -1  670.27    4.95
  -2  -4   0  144.03    2.68
   2   4   0  130.84    2.74
   2   4   0  127.08    2.18
  -2  -4  -1  767.51    5.69
   2   4   1  653.70    5.72
   2   4   1  635.46    4.45
  -2  -4  -2  626.18    5.01
   2   4   2  529.15    5.01
   2   4   2  535.20    3.72
   2   4   3  381.59    4.01
   2   4   3  332.06    3.88
   2   4   4  472.36    4.39
   2   4   4  394.71    4.10
   2   4   5  632.57    5.02
   2   4   5  505.12    4.50
   2   4   6  448.51    4.20
   2   4   6  354.29    3.71
   2   4   7  348.90    3.69
   2   4   7  273.14    3.22
   2   4   8  350.90    3.67
   2   4   8  282.06    3.24
   2   4   9  334.59    3.51
   2   4   9  281.90    3.21
   2   4  10  346.21    3.50
   2   4  10  271.67    3.14
   2   4  11  306.03    3.21
   2   4  11  238.84    2.94
   2   4  12  161.24    2.28
  -2  -5  12  119.81    4.43
  -2  -5  12  115.57    4.87
  -2  -5  11  134.53    4.45
  -2  -5  11  126.50    4.77
  -2  -5  10  196.38    4.93
  -2  -5  10  178.26    5.22
  -2  -5   9  142.47    4.14
  -2  -5   9  131.93    4.38
  -2  -5   8  160.40    4.16
  -2  -5   8  149.56    4.39
  -2  -5   7  317.88    5.43
  -2  -5   7  302.48    5.63
  -2  -5   6  235.32    4.54
  -2  -5   6  219.82    4.64
  -2  -5   5  492.34    6.14
  -2  -5   5  495.31    6.41
   2   5  -5  436.72    5.02
  -2  -5   4  333.22    4.94
  -2  -5   4  340.04    5.14
   2   5  -4  294.98    4.02
  -2  -5   3  920.49    7.76
   2   5  -3  794.31    6.28
  -2  -5   2  735.68    6.72
   2   5  -2  713.82    7.07
   2   5  -2  642.63    5.50
  -2  -5   1  615.18    5.95
   2   5  -1  586.99    6.27
   2   5  -1  531.31    4.85
  -2  -5   0  357.77    4.44
   2   5   0  323.10    4.58
   2   5   0  314.25    3.64
  -2  -5  -1  722.97    6.04
   2   5   1  653.58    6.27
   2   5   1  643.55    4.88
  -2  -5  -2  611.51    5.40
   2   5   2  515.79    5.46
   2   5   2  520.09    4.01
   2   5   3  249.63    3.74
   2   5   4  593.41    5.39
   2   5   4  474.80    4.97
   2   5   5  987.45    6.82
   2   5   5  780.05    6.21
   2   5   6  596.73    5.30
   2   5   6  494.75    4.89
   2   5   7  538.95    5.00
   2   5   7  445.50    4.56
   2   5   8  284.41    3.67
   2   5   8  232.01    3.30
   2   5   9  335.80    3.90
   2   5   9  272.83    3.51
   2   5  10  191.84    3.00
   2   5  10  149.16    2.65
   2   5  11  162.72    2.73
   2   5  11  131.59    2.49
   2   5  12   89.20    2.09
   2   5  12   72.57    1.95
   2   5  13  192.75    2.52
  -2  -6  12   35.64    3.50
  -2  -6  11   68.53    3.95
  -2  -6  10   73.67    3.60
  -2  -6  10   71.48    3.74
  -2  -6   9   68.25    3.35
  -2  -6   9   66.98    3.49
  -2  -6   8  131.30    4.14
  -2  -6   8  127.58    4.21
  -2  -6   7  242.08    5.13
  -2  -6   7  238.97    5.20
  -2  -6   6  119.18    3.67
  -2  -6   6  115.66    3.65
  -2  -6   5  143.79    3.77
  -2  -6   5  142.45    3.78
   2   6  -5  126.81    3.15
  -2  -6   4  183.59    4.05
  -2  -6   4  193.85    4.12
   2   6  -4  161.74    3.36
  -2  -6   3  140.93    3.49
   2   6  -3  125.05    2.89
  -2  -6   2  275.24    4.57
   2   6  -2  251.48    3.85
  -2  -6   1  156.29    3.41
   2   6  -1  144.78    3.54
   2   6  -1  136.02    2.80
  -2  -6   0  335.80    4.71
   2   6   0  319.71    5.01
   2   6   0  297.75    3.86
  -2  -6  -1  311.65    4.44
   2   6   1  274.89    4.54
   2   6   1  277.53    3.55
   2   6   2  472.40    5.74
   2   6   2  468.20    4.13
   2   6   3  168.41    3.44
   2   6   3  176.86    2.02
   2   6   4  285.21    4.35
   2   6   5  382.23    4.89
   2   6   6  218.89    3.70
   2   6   7  256.82    3.94
   2   6   8  235.41    3.73
   2   6   9  216.30    3.56
   2   6  10  127.93    2.79
   2   6  11  154.19    3.00
   2   6  12  111.56    2.59
  -2  -7  10   76.95    3.91
  -2  -7  10   77.24    3.98
  -2  -7   9  118.82    4.45
  -2  -7   9  112.37    4.27
  -2  -7   8  146.81    4.66
  -2  -7   8  139.97    4.46
  -2  -7   7  180.14    4.85
  -2  -7   7  175.83    4.65
  -2  -7   6  193.20    4.89
  -2  -7   6  185.52    4.52
  -2  -7   5  145.54    4.12
  -2  -7   5  146.21    3.94
   2   7  -5  127.61    3.45
  -2  -7   4  222.23    4.85
  -2  -7   4  222.74    4.52
   2   7  -4  190.15    3.95
  -2  -7   3   69.54    2.86
  -2  -7   3   77.58    2.86
   2   7  -3   59.94    2.37
  -2  -7   2  263.43    4.87
   2   7  -2  238.45    4.06
   2   7  -1  110.39    2.78
   2   7   0  247.48    4.87
   2   7   0  226.95    3.67
   2   7   1  215.09    4.42
   2   7   1  216.92    3.40
   2   7   2  384.99    5.70
   2   7   2  390.03    4.04
   2   7   3  208.18    4.23
   2   7   3  206.65    2.28
   2   7   4  138.87    3.46
   2   7   5  120.59    3.15
   2   7   6   94.93    2.88
   2   7   7   91.29    2.80
   2   7   8   80.26    2.62
   2   7   9   72.77    2.51
   2   7  10  172.89    3.56
   2   7  11   99.05    2.81
   2   7  13   53.11    2.23
   2   7  14   77.61    2.39
  -2  -8  10   67.02    4.01
  -2  -8   5  102.25    3.53
   2   8  -5   88.38    3.22
  -2  -8   4  174.60    4.23
   2   8  -4  153.33    3.88
  -2  -8   3  159.50    3.93
   2   8  -3  140.02    3.60
   2   8  -2  258.78    4.55
   2   8  -1  191.81    3.82
   2   8   0  127.29    3.09
   2   8   1  257.70    5.26
   2   8   1  250.97    3.88
   2   8   2  269.21    5.27
   2   8   2  277.01    3.62
   2   8   3  194.59    4.50
   2   8   4  135.38    3.73
   2   8   5  269.45    5.01
   2   8   6  205.96    4.42
   2   8   7  107.86    3.29
   2   8   8  166.61    3.92
   2   8   9  142.32    3.67
   2   8  10  170.10    3.96
   2   8  11  107.71    3.22
   2   8  12  119.42    3.34
   2   8  13   79.52    2.82
   2   9  -6   62.52    3.16
   2   9  -5   61.18    3.01
   2   9  -4   99.82    3.49
   2   9  -3  153.14    4.00
   2   9  -2  125.75    3.55
   2   9  -1  176.79    3.92
   2   9   0   78.90    2.71
   2   9   1  156.78    3.31
   2   9   2   73.73    2.12
   2   9   3  110.67    3.89
   2   9   4  100.97    3.68
   2   9   5  157.30    4.36
   2   9   6  150.75    4.23
   2   9   7  148.12    4.16
   2   9   8  157.98    4.29
   2   9   9   82.97    3.27
   2   9  10   81.52    3.21
   2   9  11   82.55    3.25
   2   9  12   52.83    2.80
   2   9  13   55.48    2.77
   2  10  -6   69.43    3.51
   2  10  -5   90.44    3.68
   2  10  -4   78.49    3.40
   2  10  -3   90.21    3.42
   2  10  -2   79.48    3.22
   2  10  -1  169.05    4.10
   2  10   0   85.46    2.94
   2  10   1  126.19    3.12
   2  10   2  165.46    2.81
   2  10   4  108.04    4.16
   2  10   5  127.77    4.37
   2  10   6  160.00    4.68
   2  10   7  123.62    4.23
   2  10   8  103.51    3.89
   2  10   9  102.54    3.91
   2  10  10   78.10    3.49
   2  10  11   88.47    3.67
   2  11  -4   61.44    3.31
   2  11  -3   75.41    3.47
   2  11  -2   80.51    3.41
   2  11  -1   83.49    3.23
   2  11   0   81.74    2.98
   2  11   1  110.13    2.88
   2  11   6   96.24    4.19
   2  11   7   58.86    3.49
   2  11   8   54.17    3.38
   2  11   9   76.36    3.73
   2  11  10   68.73    3.65
   2  12   0  108.84    3.18
   2  12   8   70.04    3.95
  -3  10  -1   60.82    2.48
  -3  10  -2   39.99    2.52
  -3   9   8   84.48    4.30
  -3   9   7   72.45    3.98
  -3   9   6   94.14    4.40
  -3   9   5  125.44    4.93
  -3   9   0   72.44    2.30
  -3   9  -1  102.77    3.11
  -3   9  -2  101.36    3.37
  -3   9  -3   87.74    3.39
  -3   9  -4   63.70    3.18
  -3   9  -5   68.32    3.39
  -3   9  -6   67.78    3.52
  -3   8   9   53.32    3.40
  -3   8   9   69.58    4.24
  -3   8   8   76.26    3.85
  -3   8   8   85.71    4.31
  -3   8   7  115.85    4.45
  -3   8   7  129.49    4.73
  -3   8   6  116.74    4.45
  -3   8   6  140.82    4.69
  -3   8   5  136.29    4.76
  -3   8   5  154.93    4.73
  -3   8   4  144.50    4.90
  -3   8   3  182.55    5.33
  -3   8   0  151.12    3.20
  -3   8  -1  154.72    3.63
  -3   8  -2  152.53    3.87
  -3   8  -3  169.77    4.27
  -3   8  -4  213.29    4.95
  -3   8  -5  157.74    4.51
  -3   8  -6  123.44    4.22
  -3   8  -7   83.80    3.75
  -3   7  10   88.57    3.85
  -3   7  10   97.32    4.68
  -3   7   9   84.41    3.74
  -3   7   9   96.75    4.50
  -3   7   8  133.98    4.48
  -3   7   8  138.26    4.91
  -3   7   7  103.32    3.98
  -3   7   7  114.99    4.36
  -3   7   6   66.31    3.36
  -3   7   6   78.44    3.68
  -3   7   5  123.71    4.29
  -3   7   5  133.25    4.32
  -3   7   4  154.69    4.71
  -3   7   4  172.85    4.64
  -3   7   3  109.92    4.02
  -3   7   3  130.00    4.05
  -3   7   2  117.69    4.21
  -3   7   2  132.41    3.94
  -3   7   1  178.68    2.81
  -3   7   1  196.16    4.60
  -3   7   0  197.99    3.57
  -3   7   0  213.16    4.76
  -3   7  -1   87.09    2.76
  -3   7  -1   99.59    3.60
  -3   7  -2  169.44    3.91
  -3   7  -3  117.26    3.51
  -3   7  -4  146.97    4.02
  -3   7  -5  110.37    3.69
  -3   7  -6   90.67    3.50
  -3   7  -7   89.50    3.60
  -3   6  11   65.49    3.24
  -3   6  10  109.49    3.93
  -3   6  10  115.29    4.84
  -3   6   9  152.13    4.43
  -3   6   9  157.14    5.21
  -3   6   8  110.73    3.90
  -3   6   8  127.03    4.57
  -3   6   7  135.28    4.22
  -3   6   7  147.32    4.67
  -3   6   6  121.25    3.99
  -3   6   6  136.65    4.34
  -3   6   5  110.92    3.82
  -3   6   5  129.91    4.08
  -3   6   4  173.23    4.61
  -3   6   4  182.59    4.55
  -3   6   3  147.61    4.23
  -3   6   3  161.34    4.21
  -3   6   2  243.94    5.31
  -3   6   2  261.79    5.10
  -3   6   1  210.28    4.97
  -3   6   1  217.90    3.10
  -3   6   1  229.58    4.79
  -3   6   0  378.76    6.57
  -3   6   0  390.78    4.74
  -3   6   0  400.24    6.12
  -3   6  -1  170.58    3.53
  -3   6  -1  186.43    4.37
  -3   6  -2  238.52    4.35
  -3   6  -3  153.99    3.72
  -3   6  -4  124.27    3.53
  -3   6  -5  114.61    3.53
  -3   6  -6  120.99    3.75
  -3   6  -7  127.11    3.95
   3  -6   8  109.42    4.17
   3  -6   9  155.01    5.03
   3  -6  10   87.23    4.09
   3  -6  11   54.48    3.57
   3  -6  12   61.62    3.80
  -3   5  12   67.95    3.10
  -3   5  11   96.84    3.52
  -3   5  10   69.54    3.17
  -3   5  10   71.22    3.97
  -3   5   9   88.84    3.45
  -3   5   9   97.17    4.19
  -3   5   8   98.28    3.50
  -3   5   8  100.68    4.03
  -3   5   7  174.75    4.44
  -3   5   7  187.32    4.96
  -3   5   6  142.18    4.04
  -3   5   6  152.86    4.37
  -3   5   5  148.86    4.05
  -3   5   5  173.03    4.43
  -3   5   4  272.68    5.25
  -3   5   4  298.34    5.46
  -3   5   3  176.59    4.29
  -3   5   3  200.23    4.45
  -3   5   2  170.07    4.20
  -3   5   2  193.96    4.30
  -3   5   1  172.45    4.22
  -3   5   1  179.50    2.77
  -3   5   1  198.94    4.36
  -3   5   0  247.12    4.98
  -3   5   0  250.77    3.70
  -3   5   0  265.98    4.91
  -3   5  -1  198.63    4.50
  -3   5  -1  203.59    3.62
  -3   5  -2  178.46    3.60
  -3   5  -3  198.58    3.94
  -3   5  -4  118.18    3.26
   3  -5   4  117.71    3.65
  -3   5  -5  242.16    4.60
   3  -5   5  249.65    5.20
  -3   5  -6  100.56    3.25
   3  -5   6   96.80    3.53
   3  -5   7  103.15    3.77
   3  -5   8  170.27    4.78
   3  -5   9  156.27    4.69
   3  -5  10   80.63    3.71
   3  -5  11   51.78    3.27
   3  -5  12  127.33    4.69
  -3   4  13   72.81    4.48
  -3   4  12   73.66    3.13
  -3   4  12   76.72    4.32
  -3   4  11   74.90    3.15
  -3   4  11   86.82    4.24
  -3   4  11   78.78    4.18
  -3   4  10   47.54    2.69
  -3   4  10   58.35    3.51
  -3   4  10   55.41    3.53
  -3   4   9   91.21    3.26
  -3   4   9  103.39    3.99
  -3   4   9   90.25    3.95
  -3   4   8   91.75    3.25
  -3   4   8  109.44    3.81
  -3   4   8  101.03    3.91
  -3   4   7  139.76    3.81
  -3   4   7  171.53    4.24
  -3   4   7  149.04    4.36
  -3   4   6  162.51    4.00
  -3   4   6  179.33    3.96
  -3   4   6  161.35    4.32
  -3   4   5  174.61    4.10
  -3   4   5  222.01    3.96
  -3   4   5  193.19    4.49
  -3   4   4  334.50    5.46
  -3   4   4  390.21    4.60
  -3   4   4  357.31    5.71
  -3   4   3  324.63    5.36
  -3   4   3  373.68    3.96
  -3   4   3  344.54    5.46
  -3   4   2  121.27    3.39
  -3   4   2  129.14    1.62
  -3   4   2  133.71    3.56
  -3   4   1  240.66    4.60
  -3   4   1  247.94    3.08
  -3   4   1  252.27    4.64
  -3   4   0  193.59    4.16
  -3   4   0  209.59    3.24
  -3   4  -1  254.25    4.70
  -3   4  -1  266.22    3.89
   3  -4   1  261.74    4.55
  -3   4  -2   90.84    2.98
  -3   4  -2  101.01    2.66
   3  -4   2   90.09    2.90
  -3   4  -3  488.22    5.68
   3  -4   3  473.59    6.29
  -3   4  -4  296.97    4.64
   3  -4   4  284.30    5.05
  -3   4  -5  346.33    5.11
   3  -4   5  354.78    5.77
  -3   4  -6  218.57    4.27
   3  -4   6  220.33    4.75
   3  -4   7  185.84    4.44
   3  -4   8  164.82    4.37
   3  -4   9   98.48    3.54
   3  -4  10  118.02    3.98
   3  -4  11   75.60    3.43
   3  -4  12  127.09    4.38
   3  -4  13   86.69    3.88
  -3   3  13   59.97    2.85
  -3   3  13   62.15    4.26
  -3   3  12   81.28    3.19
  -3   3  12   86.26    4.51
  -3   3  11   81.78    3.16
  -3   3  11   86.56    4.20
  -3   3  10  120.27    3.65
  -3   3  10  119.06    3.57
  -3   3  10  141.73    4.76
  -3   3  10  132.34    4.70
  -3   3   9  142.43    3.86
  -3   3   9  145.38    3.84
  -3   3   9  155.99    4.68
  -3   3   9  144.98    4.58
  -3   3   8  201.46    4.42
  -3   3   8  198.84    4.33
  -3   3   8  221.53    5.07
  -3   3   8  203.66    5.03
  -3   3   7  143.81    3.74
  -3   3   7  153.17    3.80
  -3   3   7  173.12    4.26
  -3   3   7  163.87    4.39
  -3   3   6  149.43    3.71
  -3   3   6  150.02    3.67
  -3   3   6  175.33    3.95
  -3   3   6  158.97    4.13
  -3   3   5  129.51    3.47
  -3   3   5  130.26    3.42
  -3   3   5  158.82    3.46
  -3   3   5  145.87    3.78
  -3   3   4  208.38    4.17
  -3   3   4  240.22    3.80
  -3   3   4  215.65    4.36
  -3   3   3  234.25    4.36
  -3   3   3  262.69    3.56
  -3   3   3  231.36    4.38
  -3   3   2  108.92    3.04
  -3   3   2  119.18    1.52
  -3   3   2  117.55    1.48
  -3   3   2  125.90    2.27
  -3   3   2  129.10    3.38
  -3   3   1  359.38    5.24
  -3   3   1  380.62    3.60
  -3   3   1  397.62    3.23
  -3   3   1  413.29    5.58
  -3   3   0  171.03    3.66
  -3   3   0  170.99    2.81
  -3   3   0  186.39    1.84
   3  -3   0  167.09    3.39
  -3   3  -1  251.98    4.35
  -3   3  -1  263.06    3.66
   3  -3   1  257.49    4.24
  -3   3  -2  188.61    3.79
  -3   3  -2  204.34    3.43
   3  -3   2  188.99    3.76
  -3   3  -3  282.09    4.56
  -3   3  -3  290.53    4.19
   3  -3   3  273.46    4.56
  -3   3  -4  159.96    3.29
   3  -3   4  145.12    3.48
  -3   3  -5  261.32    4.23
   3  -3   5  246.54    4.53
  -3   3  -6  304.69    4.64
   3  -3   6  304.68    5.13
   3  -3   7   76.83    2.84
   3  -3   8  147.87    3.89
   3  -3   9  150.76    4.01
   3  -3  10   87.20    3.28
   3  -3  11   63.30    3.07
   3  -3  12  101.75    3.72
   3  -3  13  134.20    4.25
   3  -3  14   50.72    3.07
  -3   2  13   68.73    3.04
  -3   2  13   65.73    4.31
  -3   2  12  115.80    3.58
  -3   2  12  120.31    5.02
  -3   2  11  110.07    3.54
  -3   2  11  109.95    4.57
  -3   2  10  223.32    4.61
  -3   2  10  224.20    5.77
  -3   2  10  204.19    5.45
  -3   2   9  209.94    4.43
  -3   2   9  206.33    5.23
  -3   2   9  199.69    5.16
  -3   2   8  310.60    5.13
  -3   2   8  299.09    5.81
  -3   2   8  289.24    5.73
  -3   2   7  341.41    5.26
  -3   2   7  346.13    5.79
  -3   2   7  321.25    5.71
  -3   2   6  409.84    5.63
  -3   2   6  420.81    5.93
  -3   2   6  406.78    6.10
  -3   2   5  183.05    3.86
  -3   2   5  199.10    3.90
  -3   2   5  191.61    4.14
  -3   2   4  334.82    4.94
  -3   2   4  374.04    4.78
  -3   2   4  355.24    5.24
  -3   2   3  616.94    6.51
  -3   2   3  694.30    5.87
  -3   2   3  628.18    6.66
  -3   2   2  413.17    5.29
  -3   2   2  471.01    2.77
  -3   2   2  456.02    2.70
  -3   2   2  510.53    4.60
  -3   2   2  494.27    5.82
  -3   2   1  496.25    5.72
  -3   2   1  523.88    5.87
  -3   2   1  585.01    4.33
  -3   2   1  555.68    4.15
  -3   2   1  617.28    4.56
  -3   2   1  548.33    6.09
   3  -2  -1  523.83    5.41
  -3   2   0 1253.45    8.92
  -3   2   0 1317.16    7.16
   3  -2   0 1247.75    8.51
  -3   2  -1 1044.01    8.09
  -3   2  -1 1074.94    6.93
   3  -2   1  974.17    7.68
  -3   2  -2  769.87    6.93
  -3   2  -2  823.42    6.36
   3  -2   2  737.73    6.82
  -3   2  -3  352.39    4.73
  -3   2  -3  372.62    4.47
   3  -2   3  343.78    4.80
  -3   2  -4  628.07    6.18
  -3   2  -4  666.71    6.06
   3  -2   4  610.17    6.44
  -3   2  -5  271.82    4.03
   3  -2   5  250.82    4.33
  -3   2  -6  422.03    5.05
   3  -2   6  413.90    5.54
   3  -2   7  188.27    3.95
   3  -2   8  362.56    5.44
   3  -2   9  371.42    5.65
   3  -2  10  197.80    4.35
   3  -2  11  168.45    4.14
   3  -2  12  119.88    3.67
   3  -2  13  143.75    4.08
   3  -2  14   40.09    2.69
  -3   1  13   90.46    3.40
  -3   1  13   76.43    4.54
  -3   1  12  136.51    3.96
  -3   1  12  126.63    5.13
  -3   1  11  122.08    3.64
  -3   1  11  119.38    4.72
  -3   1  10   97.74    3.28
  -3   1  10   96.35    4.09
  -3   1  10   93.58    3.95
  -3   1   9   94.63    3.11
  -3   1   9   92.79    3.78
  -3   1   9   87.65    3.62
  -3   1   8  182.07    3.96
  -3   1   8  180.50    4.65
  -3   1   8  164.13    4.38
  -3   1   7  237.83    4.31
  -3   1   7  243.94    4.99
  -3   1   7  232.53    4.80
  -3   1   6  189.77    3.82
  -3   1   6  191.78    4.20
  -3   1   6  192.53    4.17
  -3   1   5  220.30    4.00
  -3   1   5  218.69    4.14
  -3   1   5  212.86    4.16
  -3   1   4  497.83    5.69
  -3   1   4  510.40    5.70
  -3   1   4  532.34    5.83
  -3   1   3  465.81    5.44
  -3   1   3  442.31    5.19
  -3   1   3  483.35    5.14
  -3   1   3  462.26    5.49
   3  -1  -3  418.25    4.10
  -3   1   2  269.48    4.15
  -3   1   2  262.27    2.05
  -3   1   2  263.91    2.09
  -3   1   2  292.24    3.77
  -3   1   2  273.93    4.23
   3  -1  -2  234.00    3.16
  -3   1   1  295.86    4.24
  -3   1   1  332.78    3.12
  -3   1   1  334.58    3.19
   3  -1  -1  311.67    4.11
  -3   1   0  934.92    7.30
  -3   1   0 1039.91    6.21
   3  -1   0  944.22    7.19
  -3   1  -1  225.67    3.66
  -3   1  -1  244.20    3.78
  -3   1  -1  266.16    3.43
   3  -1   1  225.13    3.65
  -3   1  -2  708.40    6.25
  -3   1  -2  769.35    5.90
   3  -1   2  662.09    6.21
  -3   1  -3  367.03    4.47
  -3   1  -3  382.68    4.31
   3  -1   3  341.45    4.59
  -3   1  -4  615.04    5.67
  -3   1  -4  656.68    5.67
   3  -1   4  554.61    5.85
  -3   1  -5  308.51    3.99
   3  -1   5  330.63    4.47
   3  -1   5  275.30    4.27
  -3   1  -6  492.07    5.03
   3  -1   6  455.99    5.50
   3  -1   7  241.73    4.14
   3  -1   8  306.23    4.71
   3  -1   9  456.00    5.79
   3  -1  10  240.66    4.41
   3  -1  11  222.43    4.36
   3  -1  12  200.23    4.26
   3  -1  13  132.08    3.64
   3  -1  14   87.66    3.20
   3  -1  15   80.10    3.12
  -3   0  13  146.80    4.20
  -3   0  13  134.63    5.54
  -3   0  12  182.02    4.49
  -3   0  12  154.89    5.55
  -3   0  11  167.87    4.21
  -3   0  11  151.74    5.20
  -3   0  10  155.24    3.96
  -3   0  10  138.38    4.74
  -3   0   9  259.96    4.78
  -3   0   9  223.43    5.47
  -3   0   9  233.98    5.31
  -3   0   8  175.51    3.85
  -3   0   8  158.48    4.44
  -3   0   8  162.72    4.28
  -3   0   7  323.46    4.91
  -3   0   7  296.76    5.53
  -3   0   7  291.99    5.19
  -3   0   6  420.75    5.36
  -3   0   6  367.46    5.73
  -3   0   6  360.78    5.39
  -3   0   5  559.18    6.01
  -3   0   5  507.01    6.27
  -3   0   5  498.90    5.97
  -3   0   4  615.97    6.12
  -3   0   4  552.51    5.92
  -3   0   4  599.71    6.37
  -3   0   4  558.54    5.99
   3   0  -4  531.34    4.34
  -3   0   3 1033.74    7.69
  -3   0   3  959.73    7.57
  -3   0   3 1058.21    7.87
  -3   0   3  967.39    7.49
   3   0  -3  908.76    5.68
  -3   0   2  715.69    6.33
  -3   0   2  691.17    3.37
  -3   0   2  701.75    3.58
  -3   0   2  706.47    6.26
   3   0  -2  673.80    5.88
   3   0  -2  651.98    4.90
  -3   0   1  350.91    4.41
  -3   0   1  380.92    3.46
   3   0  -1  332.25    4.23
   3   0  -1  323.06    3.52
  -3   0   0  537.64    5.35
  -3   0   0  551.36    4.56
   3   0   0  486.65    5.14
  -3   0  -1  363.46    4.39
  -3   0  -1  400.10    4.11
   3   0   1  323.79    4.25
  -3   0  -2  378.14    4.41
  -3   0  -2  419.62    4.30
   3   0   2  352.04    4.45
  -3   0  -3  499.39    4.93
  -3   0  -3  515.47    4.99
   3   0   3  462.88    5.11
   3   0   4  426.57    4.94
   3   0   5  760.36    6.29
   3   0   5  599.66    5.90
   3   0   6  595.32    5.65
   3   0   6  481.02    5.36
   3   0   7  429.58    4.93
   3   0   7  363.03    4.74
   3   0   8  101.55    2.74
   3   0   9  265.11    4.23
   3   0  10  152.05    3.38
   3   0  11   82.78    2.69
   3   0  12  110.48    3.04
   3   0  13  120.61    3.26
   3   0  14  127.57    3.36
   3   0  15   40.90    2.35
  -3  -1  13   58.66    3.22
  -3  -1  13   50.18    3.96
  -3  -1  12   88.78    3.50
  -3  -1  12   76.11    4.26
  -3  -1  11  140.19    4.02
  -3  -1  11  112.11    4.65
  -3  -1  10  175.25    4.25
  -3  -1  10  157.35    5.02
  -3  -1   9  202.00    4.34
  -3  -1   9  176.76    5.00
  -3  -1   8  209.49    4.21
  -3  -1   8  173.98    4.69
  -3  -1   8  189.72    4.48
  -3  -1   7  428.34    5.59
  -3  -1   7  384.07    6.33
  -3  -1   7  392.20    5.82
  -3  -1   6  332.59    4.80
  -3  -1   6  294.04    5.25
  -3  -1   6  291.01    4.77
  -3  -1   5  242.89    4.02
  -3  -1   5  231.92    4.47
  -3  -1   5  226.57    4.00
  -3  -1   4  321.22    4.44
  -3  -1   4  290.71    4.42
  -3  -1   4  301.09    4.76
  -3  -1   4  295.59    4.25
   3   1  -4  268.12    3.16
  -3  -1   3  859.43    6.94
  -3  -1   3  813.69    7.23
  -3  -1   3  761.29    6.34
   3   1  -3  716.70    5.03
  -3  -1   2  394.72    4.65
  -3  -1   2  340.45    2.58
  -3  -1   2  362.36    2.95
  -3  -1   2  327.04    4.09
   3   1  -2  323.98    4.25
   3   1  -2  321.11    3.43
  -3  -1   1  432.47    4.77
  -3  -1   1  424.21    3.84
  -3  -1   1  436.39    4.62
   3   1  -1  376.08    4.58
   3   1  -1  367.08    3.66
  -3  -1   0  633.85    5.65
   3   1   0  512.73    5.30
   3   1   0  530.45    4.38
  -3  -1  -1  951.98    6.79
   3   1   1  851.98    6.78
  -3  -1  -2  314.09    3.90
   3   1   2  294.06    4.02
  -3  -1  -3  760.46    5.83
   3   1   3  667.25    5.97
   3   1   4  329.78    4.08
   3   1   4  248.00    3.69
   3   1   5 1213.95    7.68
   3   1   5  930.28    7.04
   3   1   6  553.74    5.25
   3   1   6  437.18    4.91
   3   1   7  466.97    4.89
   3   1   7  373.43    4.61
   3   1   8  236.26    3.64
   3   1   8  185.06    3.36
   3   1   9  403.02    4.90
   3   1  10  156.66    3.24
   3   1  11   75.70    2.44
   3   1  12  205.52    3.71
   3   1  13  160.12    3.37
   3   1  14  125.65    3.05
   3   1  15   98.97    2.79
   3   1  16  111.32    2.88
  -3  -2  13   33.10    2.96
  -3  -2  13   28.51    3.45
  -3  -2  12  127.01    4.17
  -3  -2  12   97.03    4.67
  -3  -2  11   93.84    3.60
  -3  -2  11   83.55    4.16
  -3  -2  10  138.37    3.95
  -3  -2  10  113.36    4.44
  -3  -2   9  172.79    4.16
  -3  -2   9  149.02    4.69
  -3  -2   8  287.33    5.00
  -3  -2   8  247.29    5.55
  -3  -2   7  316.58    5.01
  -3  -2   7  273.68    5.53
  -3  -2   7  303.95    5.10
  -3  -2   6  328.05    4.87
  -3  -2   6  301.10    5.46
  -3  -2   6  290.62    4.63
  -3  -2   5  161.55    3.41
  -3  -2   5  156.39    3.87
  -3  -2   5  147.08    3.21
  -3  -2   4  215.55    3.75
  -3  -2   4  200.89    4.06
  -3  -2   4  196.97    3.39
   3   2  -4  171.54    2.68
  -3  -2   3  378.14    4.70
  -3  -2   3  329.20    4.04
   3   2  -3  315.54    3.51
  -3  -2   2  238.50    3.71
  -3  -2   2  225.07    2.70
  -3  -2   2  227.07    3.23
   3   2  -2  204.96    3.58
   3   2  -2  190.05    2.75
  -3  -2   1  276.69    3.85
  -3  -2   1  241.99    3.27
   3   2  -1  249.08    3.89
   3   2  -1  219.95    2.92
  -3  -2   0  785.13    6.25
   3   2   0  637.35    6.02
   3   2   0  624.56    4.76
  -3  -2  -1 1102.94    7.27
   3   2   1  965.21    7.28
   3   2   1  879.41    5.53
  -3  -2  -2  381.30    4.26
   3   2   2  340.62    4.32
  -3  -2  -3  680.11    5.47
   3   2   3  620.30    5.72
   3   2   4  289.92    3.80
   3   2   4  245.39    3.64
   3   2   5  249.47    3.57
   3   2   5  201.51    3.31
   3   2   6  205.72    3.31
   3   2   6  161.64    2.99
   3   2   7  276.15    3.78
   3   2   7  215.48    3.45
   3   2   8  214.28    3.40
   3   2   8  171.12    3.14
   3   2   9  268.99    3.82
   3   2   9  215.92    3.52
   3   2  10  282.17    4.00
   3   2  11  146.42    3.05
   3   2  12  130.96    2.91
   3   2  13  111.83    2.76
   3   2  14   91.45    2.51
   3   2  15   85.70    2.39
  -3  -3  12  128.54    4.39
  -3  -3  12  101.31    4.80
  -3  -3  11   91.55    3.74
  -3  -3  11   79.75    4.20
  -3  -3  10  102.28    3.66
  -3  -3  10   91.38    4.16
  -3  -3   9  109.28    3.60
  -3  -3   9   96.19    4.00
  -3  -3   8  112.63    3.43
  -3  -3   8   97.56    3.81
  -3  -3   7  127.31    3.47
  -3  -3   7  115.84    3.87
  -3  -3   6  244.34    4.44
  -3  -3   6  222.65    4.85
  -3  -3   6  233.85    4.12
  -3  -3   5  150.04    3.44
  -3  -3   5  145.56    3.87
  -3  -3   5  138.62    3.05
  -3  -3   4  256.96    4.22
  -3  -3   4  248.09    4.67
  -3  -3   4  231.41    3.50
   3   3  -4  206.93    3.12
  -3  -3   3  286.75    4.27
  -3  -3   3  275.43    2.31
  -3  -3   3  299.95    2.71
  -3  -3   3  261.48    3.42
   3   3  -3  245.64    3.29
  -3  -3   2  406.48    4.88
  -3  -3   2  378.41    3.31
  -3  -3   2  366.59    3.75
   3   3  -2  365.58    4.94
   3   3  -2  333.83    3.76
  -3  -3   1  163.12    3.10
  -3  -3   1  151.97    2.42
   3   3  -1  154.06    3.26
   3   3  -1  138.01    2.47
  -3  -3   0  459.97    4.93
   3   3   0  399.73    4.96
   3   3   0  382.42    3.87
  -3  -3  -1  359.66    4.29
   3   3   1  320.39    4.37
   3   3   1  303.72    3.38
  -3  -3  -2  597.78    5.37
   3   3   2  526.07    5.47
   3   3   2  479.33    3.98
  -3  -3  -3  387.97    4.26
   3   3   3  327.82    4.26
   3   3   4  329.83    4.14
   3   3   4  267.17    3.83
   3   3   5  183.17    3.16
   3   3   5  151.37    2.91
   3   3   6  604.09    5.54
   3   3   6  500.16    5.08
   3   3   7  136.92    2.80
   3   3   7  113.78    2.56
   3   3   8  204.14    3.37
   3   3   8  165.14    3.05
   3   3   9  317.14    4.14
   3   3   9  264.14    3.81
   3   3  10  462.20    4.94
   3   3  10  376.38    4.51
   3   3  11  110.00    2.63
   3   3  12  147.55    2.97
   3   3  13  161.91    3.06
   3   3  14   67.44    2.14
  -3  -4  12   97.63    4.12
  -3  -4  12   82.43    4.52
  -3  -4  11  175.18    4.98
  -3  -4  11  153.01    5.44
  -3  -4  10  123.02    4.14
  -3  -4  10  108.04    4.50
  -3  -4   9  150.93    4.26
  -3  -4   9  131.03    4.61
  -3  -4   8   94.45    3.38
  -3  -4   8   91.62    3.79
  -3  -4   7  188.85    4.33
  -3  -4   7  168.32    4.63
  -3  -4   6  301.68    5.15
  -3  -4   6  275.53    5.51
  -3  -4   5  214.63    4.24
  -3  -4   5  213.54    4.66
  -3  -4   4  312.93    4.83
  -3  -4   4  307.78    5.34
  -3  -4   4  310.00    3.83
   3   4  -4  268.68    3.80
  -3  -4   3  691.32    6.84
  -3  -4   3  644.21    4.91
   3   4  -3  558.93    5.25
  -3  -4   2  730.48    6.82
  -3  -4   2  681.27    4.61
   3   4  -2  604.41    5.32
  -3  -4   1  192.64    3.53
  -3  -4   1  179.62    2.33
   3   4  -1  175.36    3.60
   3   4  -1  164.11    2.82
  -3  -4   0  411.41    4.89
  -3  -4   0  355.26    3.15
   3   4   0  367.27    5.00
   3   4   0  330.79    3.80
  -3  -4  -1  405.91    4.77
   3   4   1  326.78    4.62
   3   4   1  310.55    3.58
  -3  -4  -2  277.07    3.86
   3   4   2  234.67    3.87
   3   4   2  214.63    2.83
  -3  -4  -3  161.13    2.96
   3   4   3  131.06    2.90
   3   4   4  559.24    5.50
   3   4   4  424.62    4.95
   3   4   5  392.91    4.66
   3   4   5  324.07    4.30
   3   4   6  705.34    6.17
   3   4   6  550.76    5.48
   3   4   7  280.90    4.00
   3   4   7  224.29    3.56
   3   4   8  305.70    4.14
   3   4   8  244.05    3.69
   3   4   9  213.40    3.53
   3   4   9  171.12    3.15
   3   4  10  193.24    3.35
   3   4  11   84.85    2.38
   3   4  12   93.76    2.47
   3   4  13  125.62    2.74
   3   4  14   90.71    2.31
  -3  -5  11   99.84    4.13
  -3  -5  11   92.35    4.58
  -3  -5  10   54.97    3.26
  -3  -5  10   49.03    3.52
  -3  -5   9  122.05    4.15
  -3  -5   9  103.41    4.32
  -3  -5   8  140.47    4.20
  -3  -5   8  117.43    4.30
  -3  -5   7  217.82    4.90
  -3  -5   7  195.94    5.07
  -3  -5   6  222.92    4.78
  -3  -5   6  199.65    4.88
  -3  -5   5  202.78    4.41
  -3  -5   5  197.15    4.66
  -3  -5   4  252.06    4.69
  -3  -5   4  230.51    4.83
   3   5  -4  197.52    3.57
  -3  -5   3  452.26    5.92
   3   5  -3  369.46    4.63
  -3  -5   2  357.96    5.14
   3   5  -2  284.79    3.99
  -3  -5   1  410.58    5.32
  -3  -5   1  388.34    2.70
   3   5  -1  379.23    5.54
   3   5  -1  343.64    4.27
  -3  -5   0  481.23    5.59
  -3  -5   0  445.21    2.72
   3   5   0  429.53    5.72
   3   5   0  389.99    4.38
  -3  -5  -1  609.53    6.11
   3   5   1  527.56    6.18
   3   5   1  503.41    4.76
  -3  -5  -2  405.05    4.89
   3   5   2  326.21    4.80
   3   5   2  327.21    3.63
   3   5   3  582.58    6.25
   3   5   4  485.60    5.62
   3   5   5  413.98    5.10
   3   5   6  604.23    6.07
   3   5   7  528.35    5.62
   3   5   8  266.60    4.05
   3   5   9  308.89    4.33
   3   5  10  255.67    3.97
   3   5  11  169.43    3.31
   3   5  12  115.27    2.77
   3   5  13  163.71    3.18
   3   5  14  139.60    2.83
  -3  -6  11   65.30    3.90
  -3  -6  11   59.44    3.99
  -3  -6  10   91.55    4.09
  -3  -6  10   86.57    4.34
  -3  -6   9  127.68    4.48
  -3  -6   9  114.00    4.57
  -3  -6   8  168.96    4.85
  -3  -6   8  147.22    4.81
  -3  -6   7  148.23    4.36
  -3  -6   7  144.48    4.57
  -3  -6   6  283.99    5.62
  -3  -6   6  256.17    5.62
  -3  -6   5  206.64    4.70
  -3  -6   5  214.41    5.00
  -3  -6   4   96.53    3.28
  -3  -6   4   96.35    3.50
   3   6  -4   83.66    2.69
  -3  -6   3  204.99    4.38
   3   6  -3  162.51    3.43
  -3  -6   2  207.46    4.32
   3   6  -2  173.29    3.42
  -3  -6   1  216.96    4.28
   3   6  -1  189.78    3.47
  -3  -6   0  169.62    3.68
   3   6   0  144.55    3.69
   3   6   0  135.67    2.90
   3   6   1  466.86    6.23
   3   6   1  449.87    4.78
   3   6   2  336.53    5.23
   3   6   2  326.34    3.82
   3   6   3  361.63    5.31
   3   6   3  358.64    3.43
   3   6   4  178.20    3.78
   3   6   5  199.65    3.91
   3   6   6  169.25    3.58
   3   6   7  210.84    3.91
   3   6   8   75.21    2.51
   3   6   9  198.82    3.76
   3   6  10  198.41    3.76
   3   6  11  170.46    3.51
   3   6  12   73.98    2.52
   3   6  13  128.21    3.09
   3   6  14  103.38    2.73
  -3  -7  10  158.13    5.35
  -3  -7  10  137.56    5.22
  -3  -7   9   87.43    4.13
  -3  -7   9   78.76    4.12
  -3  -7   8  144.41    4.84
  -3  -7   8  126.04    4.64
  -3  -7   7  136.39    4.58
  -3  -7   7  131.68    4.51
  -3  -7   6  254.73    5.71
  -3  -7   6  241.05    5.61
  -3  -7   5  188.97    4.91
  -3  -7   5  185.30    4.83
   3   7  -5  166.29    3.98
  -3  -7   4  168.06    4.45
  -3  -7   4  176.66    4.58
   3   7  -4  154.92    3.72
  -3  -7   3  338.64    5.92
   3   7  -3  301.59    4.88
   3   7  -2  308.72    4.76
   3   7  -1  230.14    4.05
   3   7   0  293.79    4.36
   3   7   1  440.27    6.50
   3   7   1  434.36    4.97
   3   7   2  401.33    6.15
   3   7   2  395.56    4.40
   3   7   3  336.09    5.52
   3   7   3  341.64    3.47
   3   7   4  341.49    5.47
   3   7   5  266.02    4.83
   3   7   6  248.37    4.62
   3   7   7  207.12    4.19
   3   7   8  131.47    3.42
   3   7   9  215.09    4.22
   3   7  10  198.90    4.05
   3   7  11  161.96    3.69
   3   7  12  131.17    3.37
   3   7  13  124.16    3.28
   3   7  14   67.27    2.55
   3   7  15   44.14    2.11
  -3  -8   8   61.90    3.72
  -3  -8   7   54.54    3.44
  -3  -8   6   72.85    3.59
  -3  -8   5  111.76    4.07
   3   8  -5   91.01    3.33
  -3  -8   4  121.86    4.09
   3   8  -4  101.65    3.38
  -3  -8   3  193.65    4.80
   3   8  -3  158.86    3.91
   3   8  -2  239.66    4.56
   3   8  -1  141.97    3.50
   3   8   0  194.27    3.83
   3   8   1  114.45    2.89
   3   8   2  156.43    4.28
   3   8   2  149.80    2.94
   3   8   3  106.50    3.65
   3   8   3  100.21    2.02
   3   8   4  203.31    4.70
   3   8   5  124.61    3.68
   3   8   6  197.97    4.47
   3   8   7  230.73    4.78
   3   8   8  154.09    3.96
   3   8   9   95.34    3.26
   3   8  10  140.89    3.79
   3   8  11  108.47    3.42
   3   8  12   75.95    3.00
   3   8  13   57.37    2.67
   3   8  14   99.24    3.21
   3   9  -6   75.50    3.48
   3   9  -5  112.83    3.88
  -3  -9   4   76.71    3.56
   3   9  -4   61.91    3.00
  -3  -9   3  109.27    3.93
   3   9  -3   94.97    3.44
   3   9  -2  184.34    4.32
   3   9  -1  115.49    3.43
   3   9   0  122.19    3.32
   3   9   1  109.83    2.98
   3   9   2  149.76    3.01
   3   9   3  117.99    4.03
   3   9   4  105.60    3.79
   3   9   5  106.02    3.80
   3   9   6  168.23    4.55
   3   9   7  160.98    4.43
   3   9   8   91.87    3.48
   3   9   9   80.19    3.33
   3   9  10  113.69    3.78
   3   9  11   45.79    2.70
   3   9  12   37.93    2.58
   3   9  13   42.22    2.69
   3  10  -6   78.66    3.71
   3  10  -5   80.36    3.61
   3  10  -4   45.88    3.03
   3  10  -3   57.09    3.04
   3  10  -2   81.68    3.32
   3  10  -1   51.92    2.71
   3  10   0   62.98    2.74
   3  10   1  131.42    3.29
   3  10   2  111.95    2.63
   3  10   5  116.36    4.20
   3  10   6   63.68    3.26
   3  10   7   80.25    3.63
   3  10   8   61.67    3.35
   3  10   9   61.40    3.24
   3  10  10   77.40    3.57
   3  10  11   68.69    3.38
   3  10  12   60.47    3.25
   3  11  -3   67.02    3.38
   3  11  -2   88.05    3.56
   3  11  -1   95.62    3.48
   3  11   0   80.77    3.05
   3  11   1  128.35    3.23
   3  11   6   79.40    3.97
   3  11   7  102.01    4.31
   3  11   8   65.85    3.63
   3  11   9   51.22    3.41
   3  11  10   81.10    3.94
   3  12   0   49.11    2.58
   3  12   8   68.54    3.97
  -4   9  -1   93.84    2.81
  -4   9  -2   77.56    3.03
  -4   9  -3   81.11    3.35
  -4   8   8   60.17    4.20
  -4   8   7   44.34    3.57
  -4   8   7   53.93    3.92
  -4   8   6   38.53    3.47
  -4   8   6   48.64    3.70
  -4   8   5   56.23    3.76
  -4   8   5   70.64    4.01
  -4   8   4   86.16    4.15
  -4   8   0   72.10    2.19
  -4   8  -1   74.25    2.74
  -4   8  -2   65.79    2.87
  -4   8  -3  106.89    3.64
  -4   8  -4   79.67    3.41
  -4   8  -5   91.12    3.74
  -4   8  -6   62.66    3.42
  -4   8  -7   64.52    3.56
  -4   7   9   82.46    4.13
  -4   7   9   96.67    4.89
  -4   7   8  101.39    4.44
  -4   7   8  110.62    4.90
  -4   7   7   65.13    3.71
  -4   7   7   68.85    4.05
  -4   7   6   86.48    4.12
  -4   7   6   99.89    4.44
  -4   7   5   78.79    3.97
  -4   7   5   90.33    4.16
  -4   7   4   74.83    3.80
  -4   7   4   87.66    4.06
  -4   7   3  102.33    4.39
  -4   7   3  114.82    4.33
  -4   7   2  166.83    4.97
  -4   7   1  169.77    4.97
  -4   7   0  127.06    2.93
  -4   7   0  143.16    4.65
  -4   7  -1  219.52    4.20
  -4   7  -1  233.52    5.67
  -4   7  -2  102.81    3.29
  -4   7  -2  117.19    4.39
  -4   7  -3   89.02    3.31
  -4   7  -4   95.39    3.54
  -4   7  -5  110.35    3.91
  -4   7  -6   60.35    3.17
  -4   7  -7   79.63    3.61
  -4   7  -8   80.12    3.72
  -4   6  10   77.67    3.85
  -4   6  10   85.99    4.78
  -4   6   9   51.17    3.35
  -4   6   9   61.63    4.10
  -4   6   8  130.00    4.67
  -4   6   8  136.41    5.18
  -4   6   7  105.13    4.22
  -4   6   7  117.17    4.69
  -4   6   6  110.22    4.28
  -4   6   6  119.73    4.59
  -4   6   5  104.59    4.16
  -4   6   5  124.12    4.53
  -4   6   4  168.15    5.04
  -4   6   4  191.91    5.27
  -4   6   3  168.74    5.04
  -4   6   3  176.71    5.01
  -4   6   2  121.30    4.31
  -4   6   2  139.67    4.48
  -4   6   1  210.74    2.89
  -4   6   1  214.49    5.30
  -4   6   0  207.14    3.62
  -4   6   0  218.10    5.38
  -4   6  -1  227.95    4.19
  -4   6  -1  246.97    5.64
  -4   6  -2  154.78    3.77
  -4   6  -3  131.78    3.70
  -4   6  -4  168.56    4.28
  -4   6  -5  126.77    3.91
  -4   6  -6  107.06    3.77
  -4   6  -7  102.49    3.82
  -4   5  11   67.39    4.43
  -4   5  10   66.29    3.58
  -4   5  10   67.22    4.26
  -4   5   9   65.11    3.48
  -4   5   9   76.18    4.21
  -4   5   8  137.57    4.51
  -4   5   8  145.20    5.13
  -4   5   7  104.61    4.08
  -4   5   7  113.59    4.49
  -4   5   6  134.64    4.41
  -4   5   6  146.04    4.81
  -4   5   5  243.25    5.66
  -4   5   5  260.79    5.94
  -4   5   4  225.08    5.44
  -4   5   4  257.89    5.80
  -4   5   3  219.44    5.35
  -4   5   3  249.86    5.59
  -4   5   2  210.80    5.22
  -4   5   2  228.35    5.29
  -4   5   1  206.78    5.10
  -4   5   1  214.12    3.04
  -4   5   1  229.80    5.31
  -4   5   0  182.42    3.37
  -4   5   0  192.54    4.95
  -4   5  -1  198.61    3.82
  -4   5  -2  257.52    4.57
  -4   5  -3  150.91    3.77
  -4   5  -4  343.09    5.66
  -4   5  -5  188.23    4.44
  -4   5  -6  177.25    4.45
  -4   5  -7  128.44    4.01
   4  -5   8  176.24    5.24
   4  -5   9   85.26    3.97
   4  -5  10   92.28    4.18
   4  -5  11  109.15    4.53
   4  -5  12   53.27    3.59
  -4   4  11   71.99    3.56
  -4   4  11   71.97    4.43
  -4   4  10   85.06    3.79
  -4   4  10   93.46    4.63
  -4   4   9   88.53    3.74
  -4   4   9   93.94    4.34
  -4   4   8   76.91    3.43
  -4   4   8   88.10    4.12
  -4   4   7  152.18    4.55
  -4   4   7  153.00    4.89
  -4   4   6   77.15    3.39
  -4   4   6   91.27    3.84
  -4   4   5  160.91    4.49
  -4   4   5  172.44    4.77
  -4   4   4  133.33    4.12
  -4   4   4  142.92    4.37
  -4   4   3  188.56    4.67
  -4   4   3  198.28    4.84
  -4   4   2  155.36    4.26
  -4   4   2  182.25    4.66
  -4   4   1  138.08    4.10
  -4   4   1  144.81    2.55
  -4   4   1  154.08    4.33
  -4   4   0  170.11    4.44
  -4   4   0  178.16    3.25
  -4   4   0  184.91    4.69
  -4   4  -1  134.17    3.92
  -4   4  -1  141.86    3.20
  -4   4  -2  258.92    4.40
  -4   4  -3  108.47    3.13
  -4   4  -4  238.04    4.58
   4  -4   4  237.41    5.14
  -4   4  -5  234.38    4.67
   4  -4   5  240.36    5.33
  -4   4  -6  194.14    4.39
   4  -4   6  195.70    4.89
   4  -4   7  114.27    4.03
   4  -4   8  103.07    3.97
   4  -4   9  123.76    4.24
   4  -4  10   62.27    3.43
   4  -4  11   63.78    3.51
   4  -4  12   71.51    3.71
   4  -4  13  101.98    4.37
  -4   3  12   68.58    4.42
  -4   3  11  133.49    4.37
  -4   3  11  150.20    5.49
  -4   3  11  131.09    5.32
  -4   3  10   91.82    3.72
  -4   3  10   99.82    4.47
  -4   3  10   92.21    4.47
  -4   3   9  166.57    4.88
  -4   3   9  165.74    4.71
  -4   3   9  176.19    5.27
  -4   3   9  158.37    5.22
  -4   3   8  181.93    4.96
  -4   3   8  176.22    4.73
  -4   3   8  194.78    5.15
  -4   3   8  165.12    5.06
  -4   3   7  287.89    5.90
  -4   3   7  280.79    5.72
  -4   3   7  320.23    6.02
  -4   3   7  281.19    6.17
  -4   3   6  110.43    3.86
  -4   3   6  112.70    3.76
  -4   3   6  127.03    3.75
  -4   3   6  114.01    4.05
  -4   3   5  191.28    4.76
  -4   3   5  191.97    4.66
  -4   3   5  216.62    4.37
  -4   3   5  201.78    4.99
  -4   3   4  165.14    4.32
  -4   3   4  202.48    3.91
  -4   3   4  182.61    4.64
  -4   3   3  195.64    4.60
  -4   3   3  219.13    3.70
  -4   3   3  205.41    4.74
  -4   3   2  243.82    5.02
  -4   3   2  286.81    3.80
  -4   3   2  275.96    5.36
  -4   3   1  226.10    4.76
  -4   3   1  248.26    3.23
  -4   3   1  261.96    5.27
  -4   3   0  359.64    5.87
  -4   3   0  375.76    4.46
  -4   3  -1  389.07    6.08
  -4   3  -1  407.87    5.01
  -4   3  -2  308.14    4.61
   4  -3   2  287.38    5.16
  -4   3  -3  134.20    3.27
   4  -3   3  135.53    3.80
  -4   3  -4  185.39    3.90
   4  -3   4  179.40    4.35
  -4   3  -5  296.27    4.97
   4  -3   5  270.44    5.27
  -4   3  -6   51.29    2.49
   4  -3   6   48.52    2.71
   4  -3   7  152.84    4.29
   4  -3   8  136.99    4.10
   4  -3   9  147.61    4.39
   4  -3  10   57.67    3.13
   4  -3  11  105.84    4.04
   4  -3  12   67.48    3.43
   4  -3  13   42.61    3.07
  -4   2  12   56.72    3.47
  -4   2  12   55.13    4.13
  -4   2  11   84.34    3.81
  -4   2  11   89.18    4.58
  -4   2  11   79.03    4.35
  -4   2  10   55.54    3.32
  -4   2  10   57.09    3.74
  -4   2  10   53.92    3.65
  -4   2   9   80.50    3.55
  -4   2   9   80.66    3.92
  -4   2   8  120.03    4.02
  -4   2   8  119.11    4.20
  -4   2   8  109.89    4.20
  -4   2   7  152.27    4.28
  -4   2   7  160.93    4.50
  -4   2   7  153.44    4.61
  -4   2   6  104.38    3.61
  -4   2   6  115.66    3.68
  -4   2   6  105.51    3.76
  -4   2   5  121.82    3.78
  -4   2   5  128.56    3.59
  -4   2   5  123.65    3.91
  -4   2   4  267.72    5.21
  -4   2   4  304.37    4.85
  -4   2   4  276.69    5.38
  -4   2   3  136.43    3.85
  -4   2   3  152.15    3.35
  -4   2   3  143.04    3.95
  -4   2   2  237.28    4.74
  -4   2   2  237.98    4.71
  -4   2   2  233.10    2.23
  -4   2   2  267.14    3.97
  -4   2   2  254.16    5.00
  -4   2   1  257.44    4.87
  -4   2   1  262.28    4.87
  -4   2   1  273.71    3.34
  -4   2   1  306.73    3.95
  -4   2   1  272.87    5.12
  -4   2   0  331.96    5.39
  -4   2   0  358.47    4.29
  -4   2  -1  376.07    5.66
  -4   2  -1  407.37    4.87
   4  -2   1  374.30    5.54
  -4   2  -2  311.72    5.13
  -4   2  -2  332.04    4.62
   4  -2   2  310.83    5.19
  -4   2  -3  429.25    5.41
   4  -2   3  385.87    5.79
  -4   2  -4  140.92    3.31
   4  -2   4  128.32    3.60
  -4   2  -5  367.20    5.25
   4  -2   5  350.72    5.69
  -4   2  -6  140.04    3.46
   4  -2   6  125.69    3.68
   4  -2   7  250.74    5.06
   4  -2   8  178.22    4.41
   4  -2   9  262.40    5.34
   4  -2  10  224.80    5.05
   4  -2  11  154.53    4.37
   4  -2  12  121.05    4.08
   4  -2  13   76.08    3.51
   4  -2  14   89.60    3.73
  -4   1  12   92.53    3.97
  -4   1  12   81.37    4.64
  -4   1  11  114.53    4.23
  -4   1  11  101.44    4.74
  -4   1  10  110.12    4.01
  -4   1  10  105.06    4.56
  -4   1  10   98.52    4.37
  -4   1   9   65.74    3.29
  -4   1   9   60.11    3.52
  -4   1   9   55.57    3.41
  -4   1   8  135.19    4.14
  -4   1   8  125.26    4.32
  -4   1   8  122.75    4.27
  -4   1   7   92.85    3.44
  -4   1   7   95.55    3.71
  -4   1   7   90.54    3.65
  -4   1   6  230.84    4.90
  -4   1   6  214.82    4.86
  -4   1   6  210.40    4.86
  -4   1   5  148.37    3.97
  -4   1   5  150.79    3.89
  -4   1   5  139.51    3.98
  -4   1   4  397.38    6.02
  -4   1   4  408.37    5.77
  -4   1   4  379.69    5.99
  -4   1   3  207.92    4.43
  -4   1   3  236.60    4.24
  -4   1   3  206.82    4.44
   4  -1  -3  187.55    3.43
  -4   1   2  389.32    5.74
  -4   1   2  382.19    2.91
  -4   1   2  376.88    2.96
  -4   1   2  430.79    5.26
  -4   1   2  381.72    5.77
  -4   1   1  178.92    3.96
  -4   1   1  202.14    2.92
  -4   1   1  207.96    4.35
  -4   1   0   72.51    2.68
  -4   1   0   79.10    2.20
   4  -1   0   75.30    2.67
  -4   1  -1  253.22    4.52
  -4   1  -1  263.96    4.59
  -4   1  -1  275.75    4.00
   4  -1   1  254.59    4.54
  -4   1  -2  189.18    3.92
  -4   1  -2  203.78    4.02
  -4   1  -2  218.18    3.74
   4  -1   2  185.27    3.94
  -4   1  -3  143.19    3.38
  -4   1  -3  159.74    3.32
   4  -1   3  141.58    3.52
  -4   1  -4  142.28    3.21
   4  -1   4  121.17    3.32
  -4   1  -5  486.22    5.75
   4  -1   5  419.76    5.96
  -4   1  -6  241.35    4.20
   4  -1   6  206.72    4.32
   4  -1   7   83.38    2.99
   4  -1   8  213.85    4.54
   4  -1   9  113.24    3.50
   4  -1  10  133.97    3.82
   4  -1  11   70.00    3.06
   4  -1  12  105.55    3.63
   4  -1  13   76.32    3.27
   4  -1  14   90.95    3.54
  -4   0  12   65.57    3.50
  -4   0  12   62.68    4.28
  -4   0  11  129.78    4.34
  -4   0  11  119.33    5.07
  -4   0  10  160.92    4.63
  -4   0  10  145.15    5.19
  -4   0  10  148.65    5.00
  -4   0   9   81.58    3.43
  -4   0   9   73.90    3.80
  -4   0   9   78.37    3.75
  -4   0   8  224.38    5.01
  -4   0   8  206.20    5.42
  -4   0   8  198.66    5.04
  -4   0   7  259.74    5.21
  -4   0   7  254.69    5.62
  -4   0   7  242.17    5.29
  -4   0   6  282.65    5.23
  -4   0   6  277.21    5.53
  -4   0   6  263.23    5.25
  -4   0   5  177.37    4.15
  -4   0   5  175.42    4.29
  -4   0   5  159.54    4.01
  -4   0   4  491.66    6.44
  -4   0   4  482.40    6.45
  -4   0   4  449.21    6.20
  -4   0   3  548.57    6.66
  -4   0   3  574.68    6.66
  -4   0   3  539.44    6.61
   4   0  -3  488.03    5.17
  -4   0   2  401.48    5.64
  -4   0   2  385.05    3.04
  -4   0   2  398.15    3.27
   4   0  -2  353.10    4.40
  -4   0   1  508.99    6.28
  -4   0   1  522.55    4.64
  -4   0   1  520.22    6.35
   4   0  -1  462.68    5.81
  -4   0   0  389.48    5.42
  -4   0   0  409.60    4.56
   4   0   0  364.39    5.23
  -4   0  -1  566.18    6.38
  -4   0  -1  596.31    5.74
   4   0   1  485.07    6.04
  -4   0  -2  448.79    5.63
  -4   0  -2  474.78    5.28
   4   0   2  411.71    5.62
  -4   0  -3  323.48    4.74
  -4   0  -3  346.51    4.89
  -4   0  -3  365.23    4.76
   4   0   3  314.09    4.97
  -4   0  -4  618.81    6.17
   4   0   4  547.47    6.52
   4   0   5  519.35    6.40
   4   0   6  637.37    7.12
   4   0   7  181.50    4.00
   4   0   8  428.65    6.03
   4   0   9  150.41    3.81
   4   0  10  184.35    4.18
   4   0  11   98.63    3.30
   4   0  12  135.12    3.80
   4   0  13  133.79    3.86
   4   0  14  119.74    3.74
   4   0  15  114.52    3.67
  -4  -1  12   66.98    3.65
  -4  -1  12   52.50    4.06
  -4  -1  11  110.66    4.21
  -4  -1  11   98.59    4.75
  -4  -1  10  124.92    4.23
  -4  -1  10  111.64    4.72
  -4  -1   9  159.92    4.50
  -4  -1   9  129.53    4.75
  -4  -1   9  137.55    4.52
  -4  -1   8  260.34    5.33
  -4  -1   8  231.48    5.77
  -4  -1   8  233.51    5.37
  -4  -1   7  346.77    5.90
  -4  -1   7  329.93    6.44
  -4  -1   7  314.43    5.79
  -4  -1   6  194.53    4.41
  -4  -1   6  179.12    4.65
  -4  -1   6  172.61    4.24
  -4  -1   5  309.61    5.29
  -4  -1   5  283.12    5.44
  -4  -1   5  283.92    5.03
  -4  -1   4  217.37    4.40
  -4  -1   4  215.58    4.57
  -4  -1   4  203.08    4.13
  -4  -1   3  348.64    5.30
  -4  -1   3  355.03    5.52
  -4  -1   3  343.10    5.11
   4   1  -3  293.50    4.01
  -4  -1   2  195.96    3.98
  -4  -1   2  202.03    2.60
  -4  -1   2  183.97    3.79
   4   1  -2  167.77    3.07
  -4  -1   1  674.85    7.02
  -4  -1   1  675.69    5.47
  -4  -1   1  597.59    6.45
   4   1  -1  586.64    6.57
   4   1  -1  539.04    5.26
  -4  -1   0  380.42    5.22
  -4  -1   0  385.53    4.51
   4   1   0  346.00    5.14
  -4  -1  -1  643.84    6.63
  -4  -1  -1  680.63    6.17
   4   1   1  555.06    6.43
  -4  -1  -2  901.49    7.70
   4   1   2  790.55    7.65
  -4  -1  -3  361.00    4.89
   4   1   3  318.03    4.92
   4   1   4  388.20    5.41
   4   1   5  284.42    4.68
   4   1   6  441.47    5.83
   4   1   7  156.36    3.64
   4   1   8  328.31    5.14
   4   1   9  245.85    4.57
   4   1  10  212.19    4.30
   4   1  11  237.40    4.60
   4   1  12  110.63    3.35
   4   1  13  132.78    3.64
   4   1  14  143.13    3.78
   4   1  15  123.04    3.60
  -4  -2  12   69.68    3.82
  -4  -2  12   59.70    4.21
  -4  -2  11  113.41    4.26
  -4  -2  11   96.08    4.73
  -4  -2  10  151.50    4.63
  -4  -2  10  128.77    5.04
  -4  -2   9  137.18    4.30
  -4  -2   9  121.86    4.68
  -4  -2   8  114.90    3.87
  -4  -2   8   96.72    4.07
  -4  -2   8  104.89    3.82
  -4  -2   7  338.95    5.89
  -4  -2   7  276.55    6.06
  -4  -2   7  289.79    5.44
  -4  -2   6  210.68    4.61
  -4  -2   6  188.25    4.87
  -4  -2   6  196.06    4.34
  -4  -2   5  314.35    5.31
  -4  -2   5  283.02    5.59
  -4  -2   5  276.43    4.83
  -4  -2   4  194.72    4.14
  -4  -2   4  188.46    4.47
  -4  -2   4  184.87    3.83
  -4  -2   3  503.26    6.30
  -4  -2   3  450.27    5.53
   4   2  -3  416.08    4.76
  -4  -2   2  327.03    5.02
  -4  -2   2  306.14    3.45
  -4  -2   2  299.17    4.46
   4   2  -2  268.28    3.82
  -4  -2   1  536.80    6.23
  -4  -2   1  513.42    5.04
  -4  -2   1  478.71    5.49
   4   2  -1  450.08    5.89
   4   2  -1  417.63    4.65
  -4  -2   0  455.37    5.68
   4   2   0  392.06    5.50
   4   2   0  376.19    4.38
  -4  -2  -1  676.12    6.75
   4   2   1  582.80    6.62
  -4  -2  -2 1049.87    8.20
   4   2   2  924.97    8.27
  -4  -2  -3  473.57    5.46
   4   2   3  431.23    5.69
   4   2   4  276.25    4.56
   4   2   5  404.09    5.47
   4   2   6  326.55    4.97
   4   2   7  195.34    3.92
   4   2   8  140.06    3.44
   4   2   9  440.80    5.83
   4   2  10  222.05    4.27
   4   2  11  268.97    4.69
   4   2  12  115.24    3.30
   4   2  13  165.22    3.84
   4   2  14   94.22    3.11
   4   2  15   56.94    2.60
  -4  -3  11  158.10    5.01
  -4  -3  11  123.03    5.27
  -4  -3  10  178.75    5.10
  -4  -3  10  140.52    5.29
  -4  -3   9   84.29    3.59
  -4  -3   9   76.31    4.01
  -4  -3   8  102.52    3.73
  -4  -3   8   88.61    4.01
  -4  -3   7  222.24    4.98
  -4  -3   7  185.03    5.17
  -4  -3   7  202.77    4.59
  -4  -3   6  175.23    4.28
  -4  -3   6  162.43    4.69
  -4  -3   6  163.68    3.94
  -4  -3   5  178.44    4.24
  -4  -3   5  178.13    4.68
  -4  -3   5  165.02    3.72
  -4  -3   4  363.16    5.66
  -4  -3   4  361.09    6.21
  -4  -3   4  332.97    4.79
   4   3  -4  305.81    4.32
  -4  -3   3  437.99    5.98
  -4  -3   3  389.02    4.92
   4   3  -3  355.67    4.52
  -4  -3   2  461.95    5.98
  -4  -3   2  465.20    4.60
  -4  -3   2  424.50    4.95
   4   3  -2  379.78    4.60
  -4  -3   1  286.88    4.67
  -4  -3   1  266.96    3.95
   4   3  -1  233.57    3.60
  -4  -3   0  332.65    4.90
   4   3   0  288.42    4.85
   4   3   0  272.80    3.81
  -4  -3  -1  187.50    3.70
   4   3   1  122.45    3.24
   4   3   1  144.54    2.78
  -4  -3  -2  389.76    5.10
   4   3   2  341.51    5.14
  -4  -3  -3  195.45    3.61
   4   3   3  179.44    3.77
   4   3   4  161.01    3.56
   4   3   5  477.51    5.94
   4   3   6  210.87    4.00
   4   3   7  256.45    4.41
   4   3   8  139.33    3.40
   4   3   9  266.16    4.55
   4   3  10   75.83    2.66
   4   3  11  169.89    3.77
   4   3  12  116.30    3.26
   4   3  13   69.34    2.67
   4   3  14  101.14    3.07
   4   3  15   75.34    2.72
   4   3  16   46.67    2.26
  -4  -4  11   74.71    3.96
  -4  -4  11   59.90    4.17
  -4  -4  10  123.85    4.57
  -4  -4  10  104.78    4.78
  -4  -4   9   86.79    3.85
  -4  -4   9   81.46    4.16
  -4  -4   8  139.82    4.38
  -4  -4   8  125.36    4.70
  -4  -4   7  182.45    4.73
  -4  -4   7  149.71    4.83
  -4  -4   6  235.68    5.05
  -4  -4   6  218.14    5.46
  -4  -4   6  239.36    4.53
  -4  -4   5  158.36    4.16
  -4  -4   5  155.72    4.56
  -4  -4   5  149.38    3.44
  -4  -4   4  436.89    6.37
  -4  -4   4  412.41    6.81
  -4  -4   4  400.67    4.97
   4   4  -4  348.02    4.81
  -4  -4   3  294.76    5.11
  -4  -4   3  292.78    3.25
  -4  -4   3  269.96    3.92
   4   4  -3  245.16    3.97
  -4  -4   2  537.03    6.61
  -4  -4   2  490.64    4.94
   4   4  -2  435.86    5.08
  -4  -4   1  371.14    5.44
  -4  -4   1  326.30    3.99
   4   4  -1  297.00    4.17
  -4  -4   0  516.21    6.19
  -4  -4   0  482.91    4.80
   4   4   0  447.88    6.17
   4   4   0  422.47    4.82
  -4  -4  -1  215.07    4.02
   4   4   1  193.56    4.14
   4   4   1  171.48    3.09
   4   4   2  425.88    5.87
   4   4   2  379.53    4.25
   4   4   3  387.85    5.54
   4   4   4  213.50    4.16
   4   4   5  432.10    5.72
   4   4   6  506.23    6.16
   4   4   7  412.16    5.56
   4   4   8  209.35    4.08
   4   4   9  197.71    3.98
   4   4  10  181.67    3.87
   4   4  11   90.82    2.93
   4   4  12  101.17    3.06
   4   4  13   64.22    2.61
   4   4  14  165.92    3.71
   4   4  15   92.74    2.86
   4   4  16   70.33    2.43
  -4  -5  10   77.00    4.03
  -4  -5  10   63.25    4.11
  -4  -5   9   72.60    3.72
  -4  -5   9   68.09    3.99
  -4  -5   8   72.60    3.59
  -4  -5   8   63.44    3.72
  -4  -5   7  140.67    4.36
  -4  -5   7  133.25    4.72
  -4  -5   6  194.96    4.92
  -4  -5   6  169.10    4.97
  -4  -5   5   93.29    3.43
  -4  -5   5   81.49    3.63
  -4  -5   4  102.53    3.54
  -4  -5   4   93.46    3.72
   4   5  -4   82.65    2.76
  -4  -5   3   79.09    3.03
   4   5  -3   63.32    2.39
  -4  -5   2  155.21    3.87
   4   5  -2  121.92    3.03
  -4  -5   1  126.07    3.45
  -4  -5   1  125.36    2.37
   4   5  -1  104.64    2.76
  -4  -5   0  134.31    3.52
  -4  -5   0  124.35    2.33
   4   5   0  116.10    3.46
   4   5   0  107.63    2.71
  -4  -5  -1  206.75    4.09
   4   5   1  182.18    4.15
   4   5   1  164.74    3.14
   4   5   2  359.57    5.61
   4   5   2  328.37    4.08
   4   5   3  241.56    4.58
   4   5   4   82.67    2.81
   4   5   5  213.18    4.26
   4   5   6  260.67    4.64
   4   5   7   88.47    2.91
   4   5   8  164.50    3.76
   4   5   9  145.31    3.55
   4   5  10  199.48    4.09
   4   5  11   77.62    2.77
   4   5  12  148.19    3.63
   4   5  13   66.75    2.68
   4   5  14  116.49    3.24
   4   5  15   92.27    2.89
  -4  -6  10   96.42    4.45
  -4  -6  10   88.30    4.70
  -4  -6   9  111.22    4.55
  -4  -6   9   88.59    4.53
  -4  -6   8   79.15    3.88
  -4  -6   8   71.92    4.04
  -4  -6   7  222.60    5.66
  -4  -6   7  177.31    5.44
  -4  -6   6  195.04    5.16
  -4  -6   6  171.84    5.18
  -4  -6   5  160.02    4.53
  -4  -6   5  150.31    4.74
  -4  -6   4  161.92    4.41
  -4  -6   4  152.55    4.65
   4   6  -4  137.30    3.57
  -4  -6   3  289.88    5.54
   4   6  -3  235.39    4.37
  -4  -6   2  164.29    4.18
   4   6  -2  135.19    3.34
   4   6  -1  218.94    3.99
   4   6   0  186.65    3.59
   4   6   1  354.39    5.98
   4   6   1  326.76    4.46
   4   6   2  288.27    5.29
   4   6   2  274.25    3.88
   4   6   3  404.65    6.13
   4   6   4  191.90    4.27
   4   6   5  178.71    4.09
   4   6   6  181.73    4.11
   4   6   7   92.73    3.05
   4   6   8  140.05    3.66
   4   6   9  106.96    3.20
   4   6  10  176.49    4.01
   4   6  11  133.89    3.58
   4   6  12  129.84    3.56
   4   6  13   76.12    2.90
   4   6  14   55.01    2.53
   4   6  15   65.10    2.62
  -4  -7   9   85.96    4.45
  -4  -7   9   76.54    4.41
  -4  -7   8   50.42    3.55
  -4  -7   8   50.89    3.73
  -4  -7   7   80.83    4.00
  -4  -7   7   76.75    4.08
  -4  -7   6   89.72    4.02
  -4  -7   6   78.74    3.88
  -4  -7   5  113.17    4.35
  -4  -7   4  147.28    4.71
   4   7  -4  120.57    3.61
   4   7  -3  199.10    4.31
   4   7  -2  173.42    3.92
   4   7  -1  313.80    4.93
   4   7   0  172.69    3.65
   4   7   1  181.84    3.58
   4   7   2  214.59    4.94
   4   7   2  207.93    3.55
   4   7   3  332.92    5.94
   4   7   4  168.37    4.30
   4   7   5  219.56    4.74
   4   7   6  332.03    5.69
   4   7   7  249.95    4.98
   4   7   8  191.20    4.43
   4   7   9  184.25    4.28
   4   7  10  168.36    4.19
   4   7  11  191.90    4.36
   4   7  12  112.92    3.51
   4   7  13  118.41    3.56
   4   7  14   85.74    3.10
  -4  -8   8   55.70    3.88
  -4  -8   7   63.14    3.94
  -4  -8   6  135.30    4.97
  -4  -8   5   89.17    4.14
   4   8  -5   85.38    3.48
  -4  -8   4  118.43    4.45
   4   8  -4  101.63    3.58
  -4  -8   3  164.60    4.99
   4   8  -3  148.57    4.02
   4   8  -2  204.68    4.46
   4   8  -1  191.45    4.17
   4   8   0  161.75    3.73
   4   8   1  130.44    3.23
   4   8   2  173.51    3.36
   4   8   3  151.85    4.40
   4   8   4  123.80    4.02
   4   8   5  146.09    4.19
   4   8   6  272.36    5.57
   4   8   7  196.98    4.77
   4   8   8  136.50    4.02
   4   8   9  165.10    4.39
   4   8  10   99.85    3.57
   4   8  11   93.19    3.49
   4   8  12   48.91    2.80
   4   8  13   81.80    3.31
   4   8  14   58.34    2.89
  -4  -9   7   78.10    4.31
  -4  -9   6  136.66    5.10
  -4  -9   5   85.97    4.18
   4   9  -5   77.59    3.56
  -4  -9   4  108.49    4.41
   4   9  -4   98.82    3.75
  -4  -9   3  108.07    4.36
   4   9  -3   94.77    3.56
   4   9  -2   95.34    3.43
   4   9  -1   91.83    3.26
   4   9   0  149.72    3.77
   4   9   1  110.54    3.14
   4   9   2  190.80    3.57
   4   9   4  180.87    4.99
   4   9   5  117.83    4.10
   4   9   6  162.93    4.73
   4   9   7  124.48    4.18
   4   9   8  116.55    4.03
   4   9   9  122.15    4.07
   4   9  10   89.17    3.65
   4   9  11   99.27    3.79
   4   9  12   87.61    3.61
   4   9  13   51.90    3.00
   4  10  -5   95.16    4.03
   4  10  -4   78.22    3.63
   4  10  -3   85.13    3.61
  -4 -10   2   86.44    4.13
   4  10  -2   73.53    3.30
   4  10  -1   97.55    3.50
   4  10   0  114.64    3.51
   4  10   1   82.12    2.87
   4  10   2  142.74    3.08
   4  10   6  100.32    4.06
   4  10   7   95.06    4.01
   4  10   8   50.98    3.20
   4  10   9   59.23    3.44
   4  10  10   82.52    3.81
   4  10  11   85.68    3.83
   4  11  -2   70.20    3.40
   4  11  -1   91.55    3.51
   4  11   0   76.33    3.06
   4  11   1   67.36    2.66
   4  11   7   99.28    4.39
   4  11   8   60.08    3.66
   4  11   9   87.88    4.11
   4  11  10   67.80    3.73
  -5   8   5   46.85    3.99
  -5   8  -1   75.30    2.52
  -5   8  -2   62.91    2.82
  -5   8  -3   41.96    2.72
  -5   7   7   70.97    4.52
  -5   7   6   41.41    3.54
  -5   7   6   55.16    4.13
  -5   7   5   59.46    4.11
  -5   7   4   64.50    4.08
  -5   7   3   96.82    4.61
  -5   7   2   70.91    4.10
  -5   7   1   87.92    4.33
  -5   7   0  136.62    5.06
  -5   7  -1  102.97    3.05
  -5   7  -1  112.87    4.83
  -5   7  -2   64.28    2.85
  -5   7  -2   74.35    4.24
  -5   7  -3   88.51    3.43
  -5   7  -4   70.96    3.34
  -5   7  -5   47.49    3.05
  -5   7  -6   49.63    3.11
  -5   7  -7   66.32    3.56
  -5   6   8   49.86    3.71
  -5   6   8   57.59    4.27
  -5   6   7   60.36    3.91
  -5   6   7   65.99    4.30
  -5   6   6   63.33    3.84
  -5   6   6   81.38    4.46
  -5   6   5  101.34    4.53
  -5   6   5  111.98    4.86
  -5   6   4   97.43    4.47
  -5   6   4  118.15    4.86
  -5   6   3  116.90    4.79
  -5   6   2  118.04    4.73
  -5   6   1  103.71    4.46
  -5   6   0   99.04    2.59
  -5   6   0  106.47    4.53
  -5   6  -1  104.24    3.08
  -5   6  -1  111.93    4.70
  -5   6  -2  105.46    3.37
  -5   6  -2  112.31    4.65
  -5   6  -3  113.18    3.65
  -5   6  -4   95.41    3.57
  -5   6  -5  113.84    3.96
  -5   6  -6   89.33    3.71
  -5   6  -7   82.69    3.72
  -5   6  -8   55.08    3.32
  -5   5   9   49.29    3.49
  -5   5   9   57.59    4.26
  -5   5   8   53.46    3.64
  -5   5   8   53.62    4.03
  -5   5   7   60.07    3.77
  -5   5   7   72.54    4.31
  -5   5   6  107.78    4.50
  -5   5   6  118.93    4.94
  -5   5   5   65.98    3.73
  -5   5   5   75.52    4.08
  -5   5   4  116.12    4.47
  -5   5   4  135.65    4.97
  -5   5   3  140.16    4.93
  -5   5   3  153.21    5.12
  -5   5   2  151.74    5.06
  -5   5   1   82.53    4.04
  -5   5   0  140.92    3.06
  -5   5   0  154.88    5.12
  -5   5  -1  158.69    3.63
  -5   5  -1  172.54    5.31
  -5   5  -2  100.60    3.23
  -5   5  -3  146.49    3.97
  -5   5  -4  183.18    4.54
  -5   5  -5  184.38    4.70
  -5   5  -6  138.04    4.26
  -5   5  -7  118.55    4.13
  -5   4  10   76.63    4.69
  -5   4   9   86.21    4.09
  -5   4   9   91.24    4.78
  -5   4   8  163.69    5.32
  -5   4   8  164.57    5.79
  -5   4   7  106.78    4.37
  -5   4   7  115.07    4.85
  -5   4   6  131.16    4.71
  -5   4   6  135.99    4.97
  -5   4   5   83.70    3.91
  -5   4   5   96.41    4.29
  -5   4   4  156.62    4.96
  -5   4   4  164.60    5.19
  -5   4   3  117.01    4.37
  -5   4   3  137.30    4.74
  -5   4   2  155.07    4.77
  -5   4   2  177.41    5.22
  -5   4   1  140.14    4.53
  -5   4   1  155.89    2.60
  -5   4   1  164.85    5.07
  -5   4   0  224.68    3.78
  -5   4   0  228.83    5.77
  -5   4  -1  220.39    4.14
  -5   4  -2  152.44    3.73
  -5   4  -3  152.62    3.91
  -5   4  -4  162.68    4.17
  -5   4  -5  133.95    3.97
  -5   4  -6  131.33    4.05
  -5   4  -7  100.48    3.75
   5  -4   9   81.45    3.91
   5  -4  10   88.19    4.19
   5  -4  11   56.27    3.64
   5  -4  12   68.25    3.92
  -5   3  10   83.76    4.19
  -5   3  10   86.45    4.76
  -5   3   9  105.42    4.41
  -5   3   9  106.99    4.89
  -5   3   8  161.04    5.39
  -5   3   8  149.60    5.00
  -5   3   8  136.50    5.19
  -5   3   7  115.76    4.38
  -5   3   7  127.26    4.84
  -5   3   6  192.45    5.51
  -5   3   6  192.58    5.36
  -5   3   6  181.45    5.47
  -5   3   5  172.32    5.22
  -5   3   5  166.22    4.97
  -5   3   5  166.79    5.12
  -5   3   4  139.52    4.56
  -5   3   4  149.60    4.78
  -5   3   3  247.89    5.77
  -5   3   3  252.90    5.95
  -5   3   2  227.70    5.43
  -5   3   2  246.64    5.75
  -5   3   1  269.37    5.79
  -5   3   1  297.08    3.62
  -5   3   1  301.29    6.33
  -5   3   0  279.23    5.84
  -5   3   0  317.25    4.41
  -5   3   0  345.29    6.74
  -5   3  -1  479.78    5.84
  -5   3  -2  313.43    5.06
  -5   3  -3  296.18    5.13
  -5   3  -4  283.50    5.19
  -5   3  -5  166.83    4.21
  -5   3  -6  230.61    4.98
   5  -3   6  219.27    5.39
  -5   3  -7  186.58    4.64
   5  -3   7  167.86    4.85
   5  -3   8  172.90    4.98
   5  -3   9  162.22    5.01
   5  -3  10  244.37    6.05
   5  -3  11  101.43    4.25
   5  -3  12   83.32    4.02
   5  -3  13   93.08    4.22
  -5   2  11   78.35    4.68
  -5   2  11   69.67    4.56
  -5   2  10   81.10    4.37
  -5   2  10   82.24    4.48
  -5   2  10   72.35    4.40
  -5   2   9   53.55    3.72
  -5   2   9   52.52    3.69
  -5   2   9   55.29    3.85
  -5   2   8   68.37    3.92
  -5   2   8   71.85    3.83
  -5   2   8   61.64    3.78
  -5   2   7  107.94    4.33
  -5   2   7  109.93    4.20
  -5   2   7  104.28    4.40
  -5   2   6   98.27    4.13
  -5   2   6  102.57    3.88
  -5   2   6   95.45    4.12
  -5   2   5  169.54    4.88
  -5   2   5  176.82    4.56
  -5   2   5  169.27    5.02
  -5   2   4  102.41    4.05
  -5   2   4  109.23    3.54
  -5   2   4   98.66    3.96
  -5   2   3  308.06    6.24
  -5   2   3  300.51    6.08
  -5   2   3  314.63    5.17
  -5   2   3  285.81    6.01
  -5   2   2  146.04    4.52
  -5   2   2  141.04    4.31
  -5   2   2  161.00    3.63
  -5   2   2  159.00    4.67
  -5   2   1  156.17    4.46
  -5   2   1  159.70    4.42
  -5   2   1  169.35    2.88
  -5   2   1  179.96    3.61
  -5   2   1  172.86    4.76
  -5   2   0   97.05    3.56
  -5   2   0  104.04    2.69
  -5   2  -1  252.85    4.29
  -5   2  -2  172.06    3.79
  -5   2  -3  120.92    3.37
  -5   2  -4  198.00    4.30
   5  -2   4  174.31    4.55
  -5   2  -5  203.33    4.45
   5  -2   5  177.64    4.70
  -5   2  -6  186.59    4.38
   5  -2   6  174.82    4.68
   5  -2   7  104.53    3.87
   5  -2   8  115.48    4.01
   5  -2   9  153.17    4.66
   5  -2  10  123.33    4.32
   5  -2  11   89.08    3.85
   5  -2  12   78.51    3.73
   5  -2  13   99.40    4.12
  -5   1  11   84.07    4.81
  -5   1  11   85.09    4.75
  -5   1  10   92.87    4.37
  -5   1  10   89.28    4.63
  -5   1  10   87.30    4.56
  -5   1   9   98.53    4.25
  -5   1   9   86.74    4.32
  -5   1   9   85.14    4.33
  -5   1   8  114.54    4.52
  -5   1   8  107.24    4.43
  -5   1   8  103.68    4.44
  -5   1   7  175.16    5.21
  -5   1   7  174.52    5.16
  -5   1   7  166.30    5.10
  -5   1   6  128.42    4.45
  -5   1   6  125.92    4.28
  -5   1   6  120.96    4.35
  -5   1   5  257.51    5.78
  -5   1   5  237.82    5.28
  -5   1   5  224.89    5.49
  -5   1   4  177.24    4.83
  -5   1   4  182.87    4.47
  -5   1   4  171.95    4.75
  -5   1   3  393.18    6.69
  -5   1   3  416.28    6.16
  -5   1   3  373.94    6.60
  -5   1   2  266.18    5.51
  -5   1   2  320.93    5.22
  -5   1   2  291.19    5.85
  -5   1   1  182.78    4.59
  -5   1   1  191.98    3.10
  -5   1   1  210.87    4.17
  -5   1   1  200.50    4.93
  -5   1   0  230.05    5.02
  -5   1   0  250.79    3.95
  -5   1  -1  218.99    4.85
  -5   1  -1  227.64    4.88
  -5   1  -1  228.93    4.05
  -5   1  -2  177.42    3.76
  -5   1  -3  155.36    3.68
   5  -1   3  141.47    3.99
  -5   1  -4  342.76    5.38
   5  -1   4  297.70    5.64
  -5   1  -5  253.64    4.77
   5  -1   5  213.04    4.88
  -5   1  -6  216.23    4.49
   5  -1   6  189.32    4.67
   5  -1   7  251.72    5.39
   5  -1   8   94.39    3.63
   5  -1   9  102.08    3.70
   5  -1  10   75.92    3.42
   5  -1  11   84.32    3.61
   5  -1  12   28.50    2.59
   5  -1  13   89.57    3.87
   5  -1  14   71.31    3.64
  -5   0  11   56.23    3.84
  -5   0  11   57.41    4.25
  -5   0  10   66.20    3.96
  -5   0  10   63.66    4.13
  -5   0  10   60.87    4.06
  -5   0   9  111.35    4.55
  -5   0   9   98.62    4.64
  -5   0   9   91.75    4.34
  -5   0   8  126.09    4.49
  -5   0   8  118.56    4.66
  -5   0   8  115.29    4.49
  -5   0   7  147.46    4.60
  -5   0   7  147.84    4.84
  -5   0   7  143.02    4.70
  -5   0   6  142.29    4.44
  -5   0   6  138.42    4.52
  -5   0   6  134.65    4.39
  -5   0   5  149.26    4.42
  -5   0   5  144.47    4.34
  -5   0   5  134.07    4.26
  -5   0   4  136.37    4.25
  -5   0   4  134.20    4.07
  -5   0   4  134.54    4.11
  -5   0   3  100.68    3.73
  -5   0   3  107.17    3.54
  -5   0   3  101.42    3.65
   5   0  -3   83.41    2.77
  -5   0   2  325.27    5.94
  -5   0   2  310.61    3.05
  -5   0   2  329.68    5.55
  -5   0   2  300.72    5.66
  -5   0   1  118.77    3.72
  -5   0   1  128.12    2.68
  -5   0   1  125.73    3.86
  -5   0   0  298.36    5.47
  -5   0   0  308.96    4.39
  -5   0  -1  210.58    4.61
  -5   0  -1  218.70    3.98
  -5   0  -2  433.78    5.67
   5   0   2  380.60    6.13
  -5   0  -3  197.87    4.02
   5   0   3  180.94    4.42
  -5   0  -4  224.03    4.35
   5   0   4  198.76    4.63
  -5   0  -5  260.19    4.71
   5   0   5  227.61    4.90
  -5   0  -6  259.20    4.76
   5   0   6  210.01    4.75
   5   0   7  237.23    5.08
   5   0   8   92.17    3.38
   5   0   9  180.29    4.63
   5   0  10  154.95    4.36
   5   0  11  107.56    3.82
   5   0  12   66.40    3.29
   5   0  13  115.24    4.06
   5   0  14  113.53    4.11
  -5  -1  11   89.03    4.28
  -5  -1  11   79.53    4.74
  -5  -1  10   69.79    3.85
  -5  -1  10   62.69    4.21
  -5  -1  10   66.13    3.99
  -5  -1   9  103.02    4.28
  -5  -1   9   91.22    4.50
  -5  -1   9   93.43    4.30
  -5  -1   8  105.01    4.13
  -5  -1   8   96.21    4.40
  -5  -1   8   97.38    4.13
  -5  -1   7  147.05    4.61
  -5  -1   7  145.76    4.91
  -5  -1   7  144.55    4.62
  -5  -1   6  236.47    5.50
  -5  -1   6  219.23    5.59
  -5  -1   6  211.13    5.16
  -5  -1   5  116.94    3.90
  -5  -1   5  114.91    4.07
  -5  -1   5  101.01    3.69
  -5  -1   4  164.83    4.40
  -5  -1   4  166.97    4.59
  -5  -1   4  146.60    4.15
  -5  -1   3  116.89    3.73
  -5  -1   3  118.06    3.86
  -5  -1   3  110.85    3.64
   5   1  -3   93.47    2.83
  -5  -1   2  425.19    6.58
  -5  -1   2  409.13    3.80
  -5  -1   2  379.10    6.08
   5   1  -2  327.27    4.84
  -5  -1   1   91.10    3.24
  -5  -1   1   97.10    2.48
  -5  -1   1   97.68    3.42
  -5  -1   0  344.83    5.75
  -5  -1   0  333.43    4.65
  -5  -1  -1  465.67    6.51
  -5  -1  -1  475.72    5.76
  -5  -1  -2  472.95    5.90
   5   1   2  407.05    6.29
  -5  -1  -3  268.81    4.62
   5   1   3  228.45    4.80
   5   1   4  216.42    4.69
   5   1   5  241.40    5.00
   5   1   6  114.34    3.61
   5   1   7  164.96    4.21
   5   1   8  143.75    4.04
   5   1   9  149.10    4.14
   5   1  10  261.07    5.40
   5   1  11  123.24    3.94
   5   1  12  117.88    3.89
   5   1  13   91.15    3.56
   5   1  14  108.21    3.87
   5   1  15   35.13    2.71
  -5  -2  10   74.01    3.99
  -5  -2  10   61.82    4.21
  -5  -2   9   72.75    3.90
  -5  -2   9   68.00    4.13
  -5  -2   9   67.13    3.81
  -5  -2   8   97.15    4.04
  -5  -2   8   85.50    4.26
  -5  -2   8   90.23    3.97
  -5  -2   7  110.71    4.14
  -5  -2   7   98.22    4.29
  -5  -2   7   92.43    3.77
  -5  -2   6  146.69    4.48
  -5  -2   6  135.55    4.65
  -5  -2   6  129.38    4.10
  -5  -2   5  137.98    4.27
  -5  -2   5  120.44    4.27
  -5  -2   5  118.11    3.81
  -5  -2   4  247.49    5.29
  -5  -2   4  226.85    5.39
  -5  -2   4  215.85    4.72
  -5  -2   3  242.90    5.19
  -5  -2   3  233.73    5.26
  -5  -2   3  220.97    4.67
   5   2  -3  190.76    3.83
  -5  -2   2  331.28    5.79
  -5  -2   2  332.44    3.75
  -5  -2   2  301.83    5.24
   5   2  -2  269.93    4.43
  -5  -2   1  268.67    5.20
  -5  -2   1  280.86    4.10
  -5  -2   1  253.61    4.81
   5   2  -1  224.34    3.97
  -5  -2   0  174.63    4.22
  -5  -2   0  162.94    3.45
  -5  -2  -1  405.46    6.06
  -5  -2  -1  412.72    5.48
   5   2   1  360.74    5.95
   5   2   2  172.28    4.21
   5   2   3  311.74    5.55
   5   2   4  195.94    4.45
   5   2   5  281.15    5.27
   5   2   6  214.94    4.69
   5   2   7  220.96    4.77
   5   2   8  220.40    4.79
   5   2   9  122.56    3.73
   5   2  10  261.90    5.29
   5   2  11  142.50    4.07
   5   2  12  142.46    4.10
   5   2  13   91.37    3.45
   5   2  14  106.30    3.71
   5   2  15   67.40    3.19
  -5  -3  10  122.25    4.86
  -5  -3  10  103.88    5.07
  -5  -3   9  126.96    4.71
  -5  -3   9  106.80    4.93
  -5  -3   8  162.87    5.11
  -5  -3   8  140.98    5.27
  -5  -3   8  147.45    4.65
  -5  -3   7  132.86    4.51
  -5  -3   7  113.52    4.61
  -5  -3   7  118.36    4.07
  -5  -3   6  219.09    5.39
  -5  -3   6  184.58    5.42
  -5  -3   6  195.07    4.70
  -5  -3   5  313.93    6.15
  -5  -3   5  272.15    6.21
  -5  -3   5  285.28    5.33
  -5  -3   4  244.52    5.30
  -5  -3   4  225.69    5.54
  -5  -3   4  225.60    4.62
  -5  -3   3  457.55    6.92
  -5  -3   3  403.16    5.83
   5   3  -3  369.54    5.26
  -5  -3   2  476.46    6.89
  -5  -3   2  443.39    4.64
  -5  -3   2  432.65    5.90
   5   3  -2  385.19    5.27
  -5  -3   1  655.45    7.86
  -5  -3   1  622.57    6.21
  -5  -3   1  598.62    6.80
   5   3  -1  511.37    5.91
  -5  -3   0  153.66    3.94
  -5  -3   0  152.74    3.70
   5   3   0  122.12    2.99
  -5  -3  -1  584.23    7.16
   5   3   1  504.56    7.06
   5   3   2  222.26    4.77
   5   3   3  329.50    5.70
   5   3   4  252.61    5.00
   5   3   5  368.86    5.97
   5   3   6  434.66    6.48
   5   3   7  367.84    6.00
   5   3   8  267.45    5.18
   5   3   9  128.31    3.80
   5   3  10  217.73    4.80
   5   3  11  140.50    3.99
   5   3  12   49.82    2.71
   5   3  13  120.85    3.80
   5   3  14  127.64    3.87
   5   3  15   94.93    3.50
  -5  -4  10   93.84    4.43
  -5  -4   9   55.49    3.61
  -5  -4   9   48.86    3.83
  -5  -4   8  124.68    4.64
  -5  -4   8  104.70    4.81
  -5  -4   7  139.17    4.72
  -5  -4   7  119.88    4.81
  -5  -4   6  187.04    5.15
  -5  -4   6  177.62    5.47
  -5  -4   5  200.22    5.15
  -5  -4   5  172.61    5.20
  -5  -4   5  184.48    4.29
  -5  -4   4  100.52    3.70
  -5  -4   4   94.16    3.98
  -5  -4   4   95.66    3.18
  -5  -4   3  241.28    5.23
  -5  -4   3  213.15    4.17
   5   4  -3  186.28    3.96
  -5  -4   2  230.90    5.08
  -5  -4   2  223.63    3.65
  -5  -4   2  211.16    4.04
   5   4  -2  178.02    3.77
  -5  -4   1  321.43    5.69
  -5  -4   1  294.21    4.60
   5   4  -1  247.34    4.27
  -5  -4   0  157.09    4.05
  -5  -4   0  150.74    3.48
   5   4   0  125.35    3.08
   5   4   1  347.50    4.75
   5   4   2  413.59    6.49
   5   4   3  241.19    5.00
   5   4   4  327.00    5.72
   5   4   5  297.35    5.49
   5   4   6  375.17    6.09
   5   4   7  261.40    5.14
   5   4   8  257.29    5.11
   5   4   9  232.69    4.93
   5   4  10  176.43    4.37
   5   4  11  190.51    4.53
   5   4  12   75.99    3.17
   5   4  13  168.76    4.34
   5   4  14  103.52    3.59
   5   4  15  129.80    3.88
  -5  -5   9   71.31    4.03
  -5  -5   9   59.14    4.19
  -5  -5   8  145.06    5.15
  -5  -5   8  115.08    5.03
  -5  -5   7  162.79    5.06
  -5  -5   7  144.75    5.33
  -5  -5   6  174.61    5.15
  -5  -5   6  155.82    5.29
  -5  -5   5  204.74    5.37
  -5  -5   5  185.49    5.52
  -5  -5   4  145.58    4.51
  -5  -5   4  129.07    4.64
   5   5  -4  112.97    3.43
  -5  -5   3  137.07    4.21
  -5  -5   3  128.67    2.36
   5   5  -3  106.67    3.26
  -5  -5   2  194.32    4.77
  -5  -5   2  190.25    3.63
   5   5  -2  158.76    3.72
   5   5  -1  114.14    3.16
  -5  -5   0  201.23    3.63
   5   5   0  177.63    3.70
  -5  -5  -1  180.04    3.57
   5   5   1  151.72    3.32
   5   5   2  420.76    6.71
   5   5   3  146.72    4.09
   5   5   4  319.35    5.81
   5   5   5   94.34    3.39
   5   5   6  107.76    3.49
   5   5   7  110.10    3.51
   5   5   8  104.48    3.49
   5   5   9   79.34    3.13
   5   5  10  103.64    3.52
   5   5  11  198.07    4.64
   5   5  12   61.44    2.95
   5   5  13   62.60    3.05
   5   5  14   74.20    3.19
   5   5  15   51.41    2.85
  -5  -6   9   87.13    4.48
  -5  -6   8   70.57    4.05
  -5  -6   8   56.74    4.04
  -5  -6   7   87.82    4.22
  -5  -6   7   74.59    4.27
  -5  -6   6   89.09    4.13
  -5  -6   6   84.65    4.29
  -5  -6   5  177.07    5.18
  -5  -6   5  154.50    5.26
  -5  -6   4  153.87    5.13
   5   6  -4  123.61    3.71
  -5  -6   3  133.10    2.65
   5   6  -3  103.52    3.35
   5   6  -2  284.63    5.01
   5   6  -1  191.35    4.07
   5   6   0  203.65    4.05
   5   6   1  119.35    3.09
   5   6   2  365.43    4.83
   5   6   3  198.29    4.84
   5   6   4  231.21    5.18
   5   6   5  200.17    4.76
   5   6   6  218.89    4.92
   5   6   7  231.20    5.06
   5   6   8  127.20    3.88
   5   6   9  131.35    3.93
   5   6  10  166.26    4.40
   5   6  11  163.26    4.36
   5   6  12  109.28    3.73
   5   6  13   73.41    3.20
   5   6  14  115.70    3.79
  -5  -7   7   59.69    4.06
  -5  -7   6   53.64    3.82
  -5  -7   5   82.38    4.26
  -5  -7   4   68.87    3.91
   5   7  -4   66.33    3.07
  -5  -7   3  105.97    2.60
   5   7  -3   85.49    3.22
   5   7  -2  180.70    4.28
   5   7  -1  134.84    3.64
   5   7   0   88.35    2.96
   5   7   1  104.96    3.02
   5   7   2  100.71    2.77
   5   7   3   80.76    3.45
   5   7   4   63.86    3.10
   5   7   5  185.17    4.78
   5   7   6  104.45    3.70
   5   7   7  208.41    5.03
   5   7   8  147.72    4.30
   5   7   9  106.20    3.74
   5   7  10   88.66    3.52
   5   7  11   80.54    3.39
   5   7  12   71.72    3.23
   5   7  13   40.02    2.71
   5   7  14   89.52    3.55
  -5  -8   6   78.60    4.43
  -5  -8   5   99.64    4.68
   5   8  -5   90.20    3.75
  -5  -8   4  105.80    4.68
   5   8  -4   94.15    3.66
  -5  -8   3   88.69    4.31
   5   8  -3   71.01    3.21
   5   8  -2   91.74    3.38
   5   8  -1  135.97    3.81
   5   8   0   87.80    3.08
   5   8   1  147.40    3.60
   5   8   2  103.67    2.87
   5   8   4   93.21    3.80
   5   8   5  177.48    4.99
   5   8   6  102.71    3.95
   5   8   7  186.92    5.02
   5   8   8  141.09    4.41
   5   8   9   82.64    3.54
   5   8  10   92.44    3.74
   5   8  11   93.74    3.76
   5   8  12   68.05    3.40
   5   8  13   35.71    2.77
  -5  -9   5   98.83    4.82
   5   9  -5   87.10    3.85
  -5  -9   4  110.30    4.89
   5   9  -4   89.57    3.76
  -5  -9   3   53.50    3.84
   5   9  -3   48.81    3.02
   5   9  -2   74.16    3.30
   5   9  -1  107.77    3.63
   5   9   0   58.86    2.77
   5   9   1   98.51    3.13
   5   9   2  141.61    3.30
   5   9   6  112.21    4.31
   5   9   7   84.80    3.83
   5   9   8   91.92    3.91
   5   9   9   53.01    3.18
   5   9  10  100.16    4.00
   5   9  11  113.72    4.27
   5   9  12   79.44    3.77
  -5 -10   4   81.15    4.49
  -5 -10   3   74.65    4.34
   5  10  -3   68.75    3.47
  -5 -10   2  130.92    5.22
   5  10  -2  112.65    3.98
   5  10  -1  122.00    3.94
   5  10   0  104.33    3.50
   5  10   1  109.97    3.27
   5  10   7   91.36    4.18
   5  10   8  133.46    4.82
   5  10   9   82.98    4.05
   5  10  10   89.53    4.05
   5  10  11  105.11    4.36
   5  11   0   75.64    3.14
   5  11   1   45.00    2.34
   5  11   8  111.64    4.75
   5  11   9   64.29    3.95
  -6   7   3   80.70    4.79
  -6   7   2   71.59    4.59
  -6   7   1   78.55    4.68
  -6   7   0   77.21    4.61
  -6   7  -1   75.92    4.58
  -6   7  -2   99.66    3.22
  -6   7  -2  101.03    5.13
  -6   6   5   72.39    4.68
  -6   6   4   77.61    4.72
  -6   6   3  111.07    5.19
  -6   6   2   75.52    4.52
  -6   6   1   73.90    4.46
  -6   6   0   72.14    4.50
  -6   6  -1   81.66    2.72
  -6   6  -1   83.75    4.66
  -6   6  -2   73.63    2.98
  -6   6  -2   80.23    4.70
  -6   6  -3   72.39    3.20
  -6   6  -3   74.39    4.60
  -6   6  -4   94.77    3.71
  -6   6  -5  112.16    4.12
  -6   6  -6   65.95    3.51
  -6   5   6   34.93    3.43
  -6   5   6   46.27    4.06
  -6   5   5   49.41    4.01
  -6   5   4   63.69    4.28
  -6   5   3   69.66    4.31
  -6   5   2   47.40    3.79
  -6   5   1   83.74    4.51
  -6   5   0   77.87    2.24
  -6   5   0   77.23    4.41
  -6   5  -1   63.24    2.58
  -6   5  -1   67.31    4.30
  -6   5  -2   71.82    2.95
  -6   5  -2   69.54    4.30
  -6   5  -3   88.09    3.39
  -6   5  -4   52.08    2.96
  -6   5  -5   79.67    3.52
  -6   5  -6   74.07    3.55
  -6   5  -7   58.85    3.36
  -6   5  -8   41.30    3.06
  -6   4   7   91.70    4.56
  -6   4   7   89.57    4.88
  -6   4   6   98.91    4.65
  -6   4   6  104.12    5.01
  -6   4   5   80.35    4.26
  -6   4   5   82.99    4.53
  -6   4   4   79.21    4.21
  -6   4   4   91.68    4.56
  -6   4   3   98.84    4.67
  -6   4   2  131.09    5.14
  -6   4   1  139.00    5.26
  -6   4   0  158.23    3.19
  -6   4   0  173.03    5.74
  -6   4  -1  187.94    3.98
  -6   4  -1  192.72    6.00
  -6   4  -2  193.01    4.35
  -6   4  -3  130.38    3.89
  -6   4  -4   88.52    3.45
  -6   4  -5  121.27    4.04
  -6   4  -6  102.43    3.89
  -6   4  -7   69.16    3.45
  -6   3   8   39.77    3.47
  -6   3   8   35.55    3.78
  -6   3   7   75.46    4.19
  -6   3   7   73.68    4.45
  -6   3   6   80.08    4.23
  -6   3   6   77.81    4.41
  -6   3   5   53.34    3.64
  -6   3   5   53.87    3.84
  -6   3   4  117.99    4.76
  -6   3   4  116.40    4.89
  -6   3   3  124.74    4.93
  -6   3   2  131.20    4.98
  -6   3   1   98.51    4.48
  -6   3   0  178.32    3.47
  -6   3   0  173.25    5.55
  -6   3  -1  136.38    3.48
  -6   3  -2  171.36    4.09
  -6   3  -3  145.91    4.02
  -6   3  -4  145.01    4.15
  -6   3  -5  142.66    4.25
  -6   3  -6  172.94    4.73
  -6   3  -7   95.31    3.82
   6  -3  11   86.62    4.35
   6  -3  12  100.06    4.60
  -6   2   9   83.69    4.69
  -6   2   9   82.92    4.36
  -6   2   9   72.07    4.61
  -6   2   8   69.25    4.40
  -6   2   8   68.76    4.04
  -6   2   8   68.14    4.34
  -6   2   7  106.79    4.92
  -6   2   7   97.02    4.49
  -6   2   7   90.74    4.65
  -6   2   6  118.81    5.01
  -6   2   6  118.96    4.78
  -6   2   6  109.72    4.83
  -6   2   5  125.28    5.03
  -6   2   5  116.35    4.70
  -6   2   5  117.21    4.76
  -6   2   4  200.69    5.98
  -6   2   4  191.47    5.65
  -6   2   4  181.35    5.63
  -6   2   3  196.20    5.71
  -6   2   3  192.39    5.51
  -6   2   3  197.28    5.76
  -6   2   2  208.86    5.91
  -6   2   2  198.45    5.50
  -6   2   2  202.08    5.77
  -6   2   1  165.38    2.78
  -6   2   1  172.38    5.39
  -6   2   0  167.90    3.44
  -6   2   0  167.99    5.30
  -6   2  -1  124.59    3.34
  -6   2  -2  156.28    3.91
  -6   2  -3  158.61    4.10
  -6   2  -4  162.01    4.28
  -6   2  -5  170.34    4.49
  -6   2  -6  219.07    5.09
  -6   2  -7  136.26    4.28
   6  -2   8   96.14    4.13
   6  -2   9   83.42    4.05
   6  -2  10   77.66    3.99
   6  -2  11   70.14    3.86
   6  -2  12   58.82    3.70
  -6   1   9  111.15    5.20
  -6   1   9   97.39    4.84
  -6   1   9   90.05    4.85
  -6   1   8   94.97    4.64
  -6   1   8   91.56    4.56
  -6   1   8   82.69    4.53
  -6   1   7  144.70    5.33
  -6   1   7  134.86    4.98
  -6   1   7  129.75    5.15
  -6   1   6  190.28    5.84
  -6   1   6  174.10    5.31
  -6   1   6  163.38    5.47
  -6   1   5  135.31    5.02
  -6   1   5  137.42    4.63
  -6   1   5  122.87    4.78
  -6   1   4  155.05    5.10
  -6   1   4  162.41    4.71
  -6   1   4  145.46    5.01
  -6   1   3  220.44    5.82
  -6   1   3  224.17    5.16
  -6   1   3  220.12    5.86
  -6   1   2  214.13    5.77
  -6   1   2  215.32    4.90
  -6   1   2  206.63    5.65
  -6   1   1  245.63    3.50
  -6   1   1  274.99    5.24
  -6   1   1  263.47    6.24
  -6   1   0  197.73    3.76
  -6   1   0  203.75    5.53
  -6   1  -1  277.06    4.76
  -6   1  -2  246.16    4.74
  -6   1  -3  324.11    5.58
  -6   1  -4  168.37    4.29
  -6   1  -5  278.32    5.44
  -6   1  -6  332.14    6.03
   6  -1   6  297.36    6.37
   6  -1   7  208.07    5.54
   6  -1   8  114.93    4.36
   6  -1   9  186.12    5.30
   6  -1  10  129.06    4.66
   6  -1  11   72.09    3.78
   6  -1  12   81.94    4.07
   6  -1  13   98.18    4.28
  -6   0  10   78.85    4.75
  -6   0   9   75.79    4.43
  -6   0   9   63.21    4.31
  -6   0   9   62.25    4.22
  -6   0   8  115.43    4.98
  -6   0   8  102.85    4.79
  -6   0   8  102.67    4.79
  -6   0   7  142.15    5.28
  -6   0   7  126.01    5.00
  -6   0   7  135.23    5.10
  -6   0   6  192.03    5.70
  -6   0   6  185.78    5.58
  -6   0   6  165.38    5.35
  -6   0   5  107.77    4.59
  -6   0   5  109.83    4.35
  -6   0   5   99.72    4.27
  -6   0   4  103.67    4.28
  -6   0   4  106.75    4.13
  -6   0   4   97.32    4.16
  -6   0   3  192.95    5.50
  -6   0   3  196.49    5.07
  -6   0   3  175.45    5.14
  -6   0   2  123.12    4.53
  -6   0   2  131.13    4.15
  -6   0   2  118.87    4.36
  -6   0   1  190.11    5.24
  -6   0   1  185.58    3.25
  -6   0   1  193.35    5.28
  -6   0   0  170.84    3.58
  -6   0   0  185.80    5.22
  -6   0  -1  347.65    5.30
  -6   0  -2  245.65    4.75
  -6   0  -3  280.71    5.19
  -6   0  -4  153.64    4.07
  -6   0  -5  182.96    4.44
   6   0   5  167.26    4.83
  -6   0  -6  155.38    4.24
   6   0   6  132.26    4.34
   6   0   7  117.23    4.15
   6   0   8  103.53    3.97
   6   0   9  168.09    4.99
   6   0  10  121.54    4.41
   6   0  11  111.97    4.29
   6   0  12  106.12    4.32
   6   0  13   76.28    3.88
  -6  -1  10   80.97    4.69
  -6  -1   9   42.44    3.97
  -6  -1   9   39.58    3.87
  -6  -1   9   47.24    3.85
  -6  -1   8   80.25    4.33
  -6  -1   8   79.18    4.49
  -6  -1   8   70.23    4.10
  -6  -1   7   67.57    3.89
  -6  -1   7   75.12    4.22
  -6  -1   7   72.20    3.98
  -6  -1   6  122.66    4.70
  -6  -1   6  111.41    4.62
  -6  -1   6  110.05    4.43
  -6  -1   5  101.72    4.27
  -6  -1   5   95.06    4.18
  -6  -1   5   90.84    4.01
  -6  -1   4  109.13    4.20
  -6  -1   4  116.92    4.35
  -6  -1   4  109.07    4.20
  -6  -1   3  189.61    5.27
  -6  -1   3  197.98    5.25
  -6  -1   3  179.85    5.00
  -6  -1   2  142.15    4.57
  -6  -1   2  153.70    4.62
  -6  -1   2  134.79    4.41
  -6  -1   1  180.96    4.97
  -6  -1   1  174.95    3.30
  -6  -1   1  164.06    4.77
  -6  -1   0  199.32    3.92
  -6  -1   0  205.54    5.25
  -6  -1  -1  167.00    3.88
  -6  -1  -2  222.67    4.55
  -6  -1  -3  256.08    4.97
  -6  -1  -4  188.54    4.41
   6   1   4  171.46    4.74
  -6  -1  -5  104.90    3.52
   6   1   5   94.01    3.78
  -6  -1  -6  240.08    5.03
   6   1   6  206.57    5.19
   6   1   7  133.00    4.29
   6   1   8   82.58    3.55
   6   1   9  126.09    4.23
   6   1  10  164.77    4.87
   6   1  11  120.22    4.30
   6   1  12   87.11    3.90
   6   1  13   84.42    3.90
   6   1  14   58.10    3.46
  -6  -2   9   84.09    4.50
  -6  -2   9   74.54    4.63
  -6  -2   9   78.81    4.36
  -6  -2   8   53.47    3.70
  -6  -2   8   46.40    3.82
  -6  -2   8   49.46    3.60
  -6  -2   7   76.06    4.04
  -6  -2   7   76.55    4.32
  -6  -2   7   76.04    3.97
  -6  -2   6  119.09    4.66
  -6  -2   6  102.46    4.55
  -6  -2   6  104.25    4.23
  -6  -2   5  150.58    4.96
  -6  -2   5  135.04    4.95
  -6  -2   5  132.18    4.45
  -6  -2   4  102.76    4.09
  -6  -2   4  108.85    4.36
  -6  -2   4   98.21    3.90
  -6  -2   3  222.73    5.55
  -6  -2   3  229.49    5.78
  -6  -2   3  204.20    5.08
   6   2  -3  173.23    4.17
  -6  -2   2  288.36    6.16
  -6  -2   2  281.49    5.78
   6   2  -2  219.73    4.54
  -6  -2   1  172.14    4.85
  -6  -2   1  169.22    3.39
  -6  -2   1  172.20    4.65
  -6  -2   0  187.81    3.94
  -6  -2   0  190.85    4.89
  -6  -2  -1   87.00    3.01
  -6  -2  -2  218.99    4.56
  -6  -2  -3  102.00    3.38
  -6  -2  -4  164.91    4.15
   6   2   4  137.18    4.26
   6   2   5  109.21    3.88
   6   2   6  285.59    6.01
   6   2   7  142.12    4.42
   6   2   8  104.10    3.89
   6   2   9  115.85    4.10
   6   2  10  111.17    4.07
   6   2  11   55.88    3.24
   6   2  12   68.52    3.50
   6   2  13   60.79    3.39
   6   2  14   64.87    3.47
  -6  -3   9   86.53    4.64
  -6  -3   8   40.21    3.50
  -6  -3   8   30.99    3.54
  -6  -3   7  147.72    5.23
  -6  -3   7  122.45    5.18
  -6  -3   7  128.08    4.62
  -6  -3   6  117.43    4.67
  -6  -3   6   99.07    4.62
  -6  -3   6  108.66    4.19
  -6  -3   5  138.36    4.86
  -6  -3   5  121.37    4.79
  -6  -3   5  127.51    4.29
  -6  -3   4  104.43    4.17
  -6  -3   4   98.82    4.34
  -6  -3   4   92.99    3.72
  -6  -3   3  213.45    5.47
  -6  -3   3  196.79    5.57
  -6  -3   3  187.60    4.72
   6   3  -3  156.48    4.04
  -6  -3   2  248.92    5.81
  -6  -3   2  242.35    3.40
  -6  -3   2  224.02    5.02
   6   3  -2  192.61    4.29
  -6  -3   1  149.21    3.36
  -6  -3   1  148.02    4.26
   6   3  -1  114.68    3.35
  -6  -3   0  283.58    4.84
  -6  -3   0  277.26    5.49
  -6  -3  -1  200.00    4.32
   6   3   4  216.69    5.22
   6   3   5  200.18    5.04
   6   3   6  284.11    5.91
   6   3   7  290.35    5.98
   6   3   8  166.50    4.65
   6   3   9  189.79    5.01
   6   3  10  157.84    4.70
   6   3  11   94.51    3.85
   6   3  12  110.53    4.12
   6   3  13   89.37    3.89
   6   3  14   89.47    3.81
  -6  -4   8   53.88    3.83
  -6  -4   8   50.84    4.08
  -6  -4   7  119.76    4.89
  -6  -4   7   97.13    4.84
  -6  -4   6  124.53    4.84
  -6  -4   6  107.50    4.88
  -6  -4   5  124.86    4.74
  -6  -4   5  121.84    4.95
  -6  -4   4   91.46    4.01
  -6  -4   4   83.04    4.16
  -6  -4   3   74.47    3.21
   6   4  -3   61.10    2.83
  -6  -4   2  111.82    2.66
  -6  -4   2  105.92    3.59
   6   4  -2   87.52    3.16
  -6  -4   1  100.67    2.99
  -6  -4   1  102.55    3.51
   6   4  -1   77.25    2.87
  -6  -4   0  135.84    3.63
  -6  -4   0  140.07    3.97
   6   4   0  107.45    3.20
   6   4   4  112.05    3.94
   6   4   5  143.69    4.44
   6   4   6   99.94    3.83
   6   4   7  177.97    4.79
   6   4   8   68.31    3.28
   6   4   9  109.10    3.95
   6   4  10  144.62    4.46
   6   4  11  122.96    4.18
   6   4  12  112.78    4.12
   6   4  13   72.97    3.53
   6   4  14   83.29    3.75
  -6  -5   8   94.18    4.80
  -6  -5   7   76.21    4.13
  -6  -5   7   59.44    4.19
  -6  -5   6  215.04    6.16
  -6  -5   6  185.96    6.20
  -6  -5   5  124.70    5.12
  -6  -5   4  148.09    5.35
   6   5  -3  139.54    4.00
  -6  -5   2  295.29    4.25
   6   5  -2  224.96    4.75
  -6  -5   1  253.28    4.59
   6   5  -1  195.57    4.32
   6   5   0  155.02    3.79
  -6  -5  -1  316.12    5.30
   6   5   4  185.87    5.05
   6   5   5  216.24    5.32
   6   5   6  208.43    5.27
   6   5   7  206.32    5.17
   6   5   8   97.59    3.82
   6   5   9  127.82    4.25
   6   5  10  195.03    5.11
   6   5  11  138.78    4.47
   6   5  12  116.86    4.18
   6   5  13  124.06    4.28
   6   5  14   69.92    3.52
  -6  -6   6  107.09    5.11
  -6  -6   5   55.08    3.96
  -6  -6   4  104.31    4.80
   6   6  -4   84.83    3.50
   6   6  -3  121.66    3.89
  -6  -6   2  221.69    3.95
   6   6  -2  172.80    4.36
   6   6  -1  157.28    4.05
   6   6   0  131.29    3.59
   6   6   1  158.57    3.76
   6   6   5  132.57    4.39
   6   6   7  203.39    5.30
   6   6   8  210.79    5.37
   6   6   9  122.42    4.24
   6   6  10  157.29    4.71
   6   6  11  116.06    4.20
   6   6  12  109.51    4.13
   6   6  13   97.48    3.93
   6   6  14   65.13    3.46
  -6  -7   6   83.60    4.75
  -6  -7   5  115.37    5.23
  -6  -7   4   84.17    4.58
   6   7  -4   66.99    3.33
  -6  -7   3  119.57    5.08
   6   7  -3   98.41    3.69
  -6  -7   2  121.71    3.22
   6   7  -2   97.19    3.55
   6   7  -1  138.39    3.95
   6   7   0  122.25    3.58
   6   7   1   94.41    3.09
   6   7   5   53.11    3.30
   6   7   6  186.90    5.21
   6   7   7  153.12    4.74
   6   7   8  146.41    4.71
   6   7   9   76.11    3.71
   6   7  10  107.45    4.11
   6   7  11   76.64    3.60
   6   7  12   38.88    2.97
   6   7  13   42.37    3.02
  -6  -8   5  127.98    5.56
   6   8  -5  120.00    4.38
  -6  -8   4   40.60    3.81
   6   8  -4   38.52    2.92
  -6  -8   3   84.12    4.65
   6   8  -3   70.13    3.38
  -6  -8   2   67.64    2.72
   6   8  -2   58.38    3.11
   6   8  -1   76.00    3.25
   6   8   0   59.44    2.78
   6   8   1   71.55    2.83
   6   8   6  114.20    4.38
   6   8   7   99.51    4.20
   6   8   8   61.43    3.50
   6   8   9   73.30    3.70
   6   8  10   80.56    3.89
   6   8  11   79.27    3.86
   6   8  12   60.85    3.51
  -6  -9   3   85.24    4.80
   6   9  -3   75.08    3.62
  -6  -9   2   93.66    3.02
   6   9  -2   71.90    3.42
   6   9  -1   67.95    3.19
   6   9   0   86.53    3.26
   6   9   1   85.88    3.06
   6   9   7  121.79    4.74
   6   9   8   46.85    3.36
   6   9   9   65.08    3.70
   6   9  10   52.67    3.53
   6   9  11   86.00    4.14
  -6 -10   2   82.90    2.78
   6  10  -1   61.21    3.17
   6  10   0   82.90    3.25
   6  10   8   79.18    4.19
   6  10   9   67.76    3.91
   6  10  10   73.52    4.12
  -7   6  -1   73.66    4.90
  -7   6  -2   66.28    4.84
  -7   6  -3   63.58    4.82
  -7   5   3   75.19    4.91
  -7   5   2   79.60    4.92
  -7   5   1   88.21    5.07
  -7   5   0   75.93    4.83
  -7   5  -1  122.75    2.91
  -7   5  -1  113.90    5.57
  -7   5  -2  115.87    3.50
  -7   5  -2  112.54    5.55
  -7   5  -3   58.27    3.00
  -7   5  -3   57.10    4.55
  -7   5  -4   69.07    3.38
  -7   4   4   62.34    4.55
  -7   4   3   87.49    4.97
  -7   4   2   75.10    4.71
  -7   4   1   81.41    4.76
  -7   4   0  101.15    5.18
  -7   4  -1  126.54    3.27
  -7   4  -1  129.29    5.62
  -7   4  -2  115.69    3.57
  -7   4  -2  121.58    5.55
  -7   4  -3   87.80    3.44
  -7   4  -4  103.68    3.86
  -7   4  -5   87.22    3.76
  -7   4  -6   61.94    3.40
  -7   4  -7   87.79    3.97
  -7   4  -8   65.93    3.66
  -7   3   5   56.13    4.32
  -7   3   4   69.61    4.51
  -7   3   3   60.82    4.31
  -7   3   2   94.91    4.90
  -7   3   1   69.40    4.39
  -7   3   0   49.97    1.99
  -7   3   0   54.62    4.11
  -7   3  -1   50.25    2.46
  -7   3  -1   54.24    4.15
  -7   3  -2   78.84    3.12
  -7   3  -2   77.57    4.65
  -7   3  -3   50.81    2.86
  -7   3  -4   51.65    2.99
  -7   3  -5   85.12    3.69
  -7   3  -6   62.18    3.36
  -7   3  -7   72.29    3.66
  -7   3  -8   43.02    3.16
  -7   2   6   99.67    5.31
  -7   2   6   85.78    4.69
  -7   2   6   78.23    4.73
  -7   2   5   71.07    4.47
  -7   2   4   98.73    4.94
  -7   2   3   92.24    4.78
  -7   2   2  154.82    5.72
  -7   2   1   99.80    4.84
  -7   2   0  108.25    2.80
  -7   2   0  107.08    4.97
  -7   2  -1  116.21    3.33
  -7   2  -1  119.57    5.14
  -7   2  -2  143.05    3.94
  -7   2  -3   88.64    3.44
  -7   2  -4  105.25    3.79
  -7   2  -5  160.26    4.68
  -7   2  -6  137.67    4.48
  -7   2  -7  111.53    4.24
  -7   1   7  111.14    5.58
  -7   1   7   92.80    5.07
  -7   1   6   86.56    4.96
  -7   1   6   76.67    4.58
  -7   1   5   85.28    4.82
  -7   1   5   72.87    4.39
  -7   1   4   87.50    4.62
  -7   1   3   70.19    4.22
  -7   1   2   95.94    4.62
  -7   1   1  125.35    5.09
  -7   1   0  122.49    3.07
  -7   1   0  114.20    4.92
  -7   1  -1  165.92    3.93
  -7   1  -1  162.98    5.62
  -7   1  -2  184.86    4.41
  -7   1  -3  152.94    4.25
  -7   1  -4  123.21    4.03
  -7   1  -5  138.27    4.34
  -7   1  -6  130.76    4.35
  -7   1  -7   93.60    3.92
   7  -1  11   94.18    4.53
   7  -1  12   88.64    4.46
  -7   0   7  103.46    5.21
  -7   0   7   89.24    4.88
  -7   0   6   86.53    4.84
  -7   0   6   91.23    4.57
  -7   0   6   76.41    4.47
  -7   0   5  128.47    5.26
  -7   0   5  122.63    4.91
  -7   0   5  116.57    5.07
  -7   0   4   92.23    4.28
  -7   0   4   88.09    4.50
  -7   0   3  114.25    4.48
  -7   0   3  100.85    4.64
  -7   0   2  135.15    4.63
  -7   0   2  120.74    4.91
  -7   0   1  185.25    2.96
  -7   0   1  176.59    5.67
  -7   0   0  122.68    3.19
  -7   0   0  119.10    4.89
  -7   0  -1  195.43    4.27
  -7   0  -1  181.90    5.78
  -7   0  -2  229.90    4.89
  -7   0  -3  222.67    5.00
  -7   0  -4  143.38    4.26
  -7   0  -5  157.39    4.54
  -7   0  -6  155.50    4.61
  -7   0  -7  112.00    4.12
   7   0   9   93.01    4.37
   7   0  10  140.46    5.02
   7   0  11  141.00    5.17
   7   0  12   75.64    4.11
  -7  -1   8   42.83    3.98
  -7  -1   7   85.50    4.92
  -7  -1   7   76.66    4.53
  -7  -1   7   69.65    4.35
  -7  -1   6   96.99    5.05
  -7  -1   6   93.25    4.72
  -7  -1   6   89.06    4.61
  -7  -1   5  108.36    5.14
  -7  -1   5  104.09    4.75
  -7  -1   5  100.80    4.69
  -7  -1   4  120.45    4.82
  -7  -1   4  107.61    4.69
  -7  -1   3  164.47    5.34
  -7  -1   3  143.26    5.12
  -7  -1   2  209.52    5.75
  -7  -1   2  169.01    5.42
  -7  -1   1  201.94    3.35
  -7  -1   1  192.04    5.70
  -7  -1   0  111.16    3.17
  -7  -1   0  115.16    4.69
  -7  -1  -1  138.45    3.77
  -7  -1  -1  135.26    4.99
  -7  -1  -2  175.15    4.38
  -7  -1  -3  137.52    4.07
  -7  -1  -4  107.66    3.79
  -7  -1  -5  201.45    5.02
  -7  -1  -6  183.56    4.90
  -7  -1  -7  139.20    4.45
   7   1   8  118.82    4.67
   7   1   9  132.68    4.90
   7   1  10   77.54    4.00
   7   1  11  115.34    4.65
   7   1  12   61.22    3.73
   7   1  13   76.21    4.04
  -7  -2   8   76.08    4.54
  -7  -2   7   93.15    5.15
  -7  -2   7   87.61    4.92
  -7  -2   7   72.73    4.32
  -7  -2   6  140.60    5.63
  -7  -2   6  124.22    5.37
  -7  -2   6  117.10    4.91
  -7  -2   5   92.62    4.63
  -7  -2   5   91.78    4.39
  -7  -2   4  164.03    5.61
  -7  -2   4  156.33    5.20
  -7  -2   3  153.94    5.35
  -7  -2   3  143.06    5.00
  -7  -2   2  230.68    6.20
  -7  -2   2  208.97    5.73
  -7  -2   1  218.40    3.69
  -7  -2   1  204.28    5.64
  -7  -2   0  202.43    4.17
  -7  -2   0  190.69    5.50
  -7  -2  -1  161.62    4.08
  -7  -2  -1  168.03    5.24
  -7  -2  -2  205.45    4.71
  -7  -2  -3  174.33    4.54
  -7  -2  -4  170.10    4.58
  -7  -2  -5  206.64    5.07
  -7  -2  -6  221.16    5.29
   7   2   7  217.37    5.91
   7   2   8  173.49    5.38
   7   2   9  133.40    4.82
   7   2  10   74.92    3.89
   7   2  11  124.15    4.74
   7   2  12   59.00    3.61
   7   2  13   47.74    3.52
  -7  -3   7   51.71    4.00
  -7  -3   6   94.98    4.98
  -7  -3   5   66.97    4.28
  -7  -3   5   69.36    3.86
  -7  -3   4   83.03    4.44
  -7  -3   4   80.07    3.93
  -7  -3   3   44.47    3.65
  -7  -3   3   43.46    3.30
  -7  -3   2   75.48    3.77
  -7  -3   1  115.74    3.02
  -7  -3   1  115.13    4.37
  -7  -3   0   95.98    3.19
  -7  -3   0   95.62    4.12
  -7  -3  -1   75.59    3.11
  -7  -3  -1   75.29    3.86
  -7  -3  -2  197.65    4.75
  -7  -3  -3  166.70    4.50
  -7  -3  -4  116.20    3.96
   7   3   7  103.98    4.32
   7   3   8  100.68    4.18
   7   3   9   91.23    4.12
   7   3  10  104.29    4.34
   7   3  11  106.02    4.42
   7   3  12   80.89    4.06
   7   3  13   50.80    3.53
  -7  -4   6   86.62    4.92
  -7  -4   5  109.98    5.19
  -7  -4   4   76.83    4.48
  -7  -4   3  104.28    4.88
   7   4  -3   86.04    3.50
  -7  -4   2   89.92    3.87
   7   4  -2   69.21    3.13
  -7  -4   1  147.41    3.45
  -7  -4   1  145.02    4.57
  -7  -4   0   92.10    3.22
  -7  -4   0   93.75    3.92
  -7  -4  -1  111.21    3.66
  -7  -4  -1  116.69    4.28
  -7  -4  -2  193.14    4.77
   7   4   7   52.49    3.25
   7   4   8   65.35    3.52
   7   4   9   60.62    3.55
   7   4  10   70.24    3.75
   7   4  11   79.78    3.93
   7   4  12   94.24    4.28
   7   4  13   38.87    3.26
  -7  -5   5   75.76    4.68
  -7  -5   4   64.91    4.38
  -7  -5   3  125.03    5.34
   7   5  -3  102.25    3.78
   7   5  -2   80.23    3.35
  -7  -5   1  196.28    4.02
  -7  -5   0  147.67    3.98
  -7  -5  -1  119.68    3.86
  -7  -5  -2  137.33    4.38
   7   5   7  162.49    5.11
   7   5   8  139.53    4.78
   7   5   9  134.56    4.80
   7   5  10   86.70    4.03
   7   5  11  123.83    4.65
   7   5  12  122.29    4.71
   7   5  13   63.29    3.72
  -7  -6   4   70.72    4.55
   7   6  -4   60.87    3.38
  -7  -6   3   68.14    4.42
   7   6  -3   56.22    3.09
   7   6  -2   83.00    3.46
  -7  -6   1  160.11    3.81
   7   6  -1  118.23    3.84
  -7  -6   0  138.61    3.99
   7   6   7  165.10    5.31
   7   6   8  115.40    4.57
   7   6   9  111.60    4.51
   7   6  10   79.55    3.94
   7   6  11   85.88    4.16
   7   6  12   56.65    3.52
   7   7  -4   89.93    3.93
  -7  -7   3   55.54    4.30
   7   7  -3   45.19    3.07
   7   7  -2   86.94    3.58
  -7  -7   1   85.29    3.13
   7   7  -1   65.69    3.15
  -7  -7   0  131.70    4.03
   7   7   8  109.06    4.56
   7   7   9  107.06    4.51
   7   7  10   89.60    4.29
   7   7  11   77.95    4.06
   7   7  12   92.44    4.30
   7   8  -2   59.66    3.20
  -7  -8   1   87.96    3.19
   7   8  -1   64.44    3.16
   7   8   9   53.13    3.61
   7   8  10   67.91    3.90
   7   8  11   74.72    4.02
  -7  -9   1  141.64    3.80
   7   9   9   75.03    4.19
   7   9  10   71.40    4.07
  -8   3   1   88.10    5.17
  -8   3   0   60.42    4.61
  -8   3  -1   87.30    5.17
  -8   3  -2   53.64    2.73
  -8   3  -2   58.35    4.65
  -8   3  -3   70.16    3.24
  -8   3  -3   69.68    4.91
  -8   2   2   62.67    4.58
  -8   2   1   77.86    4.83
  -8   2   0   81.94    4.92
  -8   2  -1   93.93    2.92
  -8   2  -1   86.86    5.04
  -8   2  -2   90.08    3.30
  -8   2  -2   93.62    5.19
  -8   2  -3   90.48    3.58
  -8   2  -4  102.82    3.96
  -8   2  -5   55.64    3.28
  -8   2  -6  100.27    4.19
  -8   2  -7   87.93    4.04
  -8   2  -8   60.07    3.63
  -8   1   3   44.61    4.18
  -8   1   2   72.76    4.65
  -8   1   1   53.51    4.24
  -8   1   0   73.20    4.64
  -8   1  -1   76.76    2.86
  -8   1  -1   73.14    4.67
  -8   1  -2  132.22    3.89
  -8   1  -2  138.89    5.82
  -8   1  -3   71.91    3.31
  -8   1  -4  103.33    3.94
  -8   1  -5   52.38    3.25
  -8   1  -6   70.71    3.64
  -8   1  -7   65.64    3.67
  -8   1  -8   41.48    3.24
  -8   0   4   44.22    4.06
  -8   0   3   63.80    4.44
  -8   0   2  100.37    5.05
  -8   0   1   59.12    4.24
  -8   0   0   82.44    4.69
  -8   0  -1   71.57    2.90
  -8   0  -1   73.17    4.57
  -8   0  -2   92.01    3.44
  -8   0  -2  101.30    5.14
  -8   0  -3   71.81    3.32
  -8   0  -4   94.07    3.84
  -8   0  -5   80.89    3.72
  -8   0  -6   70.75    3.69
  -8   0  -7  104.46    4.28
  -8  -1   5   85.67    4.91
  -8  -1   4   77.85    4.63
  -8  -1   3   93.92    4.92
  -8  -1   2  130.45    5.42
  -8  -1   1  136.20    5.45
  -8  -1   0  113.28    3.02
  -8  -1   0  105.09    4.99
  -8  -1  -1  112.60    3.50
  -8  -1  -1  112.14    5.10
  -8  -1  -2   84.51    3.38
  -8  -1  -2   81.57    4.72
  -8  -1  -3  129.02    4.18
  -8  -1  -4   95.15    3.84
  -8  -1  -5  126.69    4.40
  -8  -1  -6  100.01    4.09
  -8  -1  -7  186.92    5.36
  -8  -2   5   86.93    4.76
  -8  -2   4   63.91    4.36
  -8  -2   4   64.25    4.26
  -8  -2   3   72.16    4.41
  -8  -2   3   70.70    4.35
  -8  -2   2  111.04    5.04
  -8  -2   2  103.19    4.87
  -8  -2   1  134.38    5.28
  -8  -2   1  115.88    5.04
  -8  -2   0   83.97    2.87
  -8  -2   0   85.06    4.58
  -8  -2  -1  154.60    5.58
  -8  -2  -2  126.98    4.03
  -8  -2  -2  123.73    5.25
  -8  -2  -3  195.13    4.99
  -8  -2  -4  120.75    4.23
  -8  -2  -5  148.73    4.70
  -8  -2  -6  140.16    4.67
  -8  -2  -7  191.90    5.41
   8   2  11   92.95    4.62
  -8  -3   4   77.62    4.75
  -8  -3   3   58.96    4.28
  -8  -3   3   55.07    3.90
  -8  -3   2   87.18    4.76
  -8  -3   2   88.21    4.47
  -8  -3   1   82.19    4.33
  -8  -3   0   69.69    2.81
  -8  -3   0   70.47    4.15
  -8  -3  -1  124.84    3.84
  -8  -3  -1  119.06    4.92
  -8  -3  -2  120.35    4.03
  -8  -3  -2  128.69    5.10
  -8  -3  -3  125.62    4.22
  -8  -3  -4  135.92    4.50
  -8  -3  -5   93.95    3.97
  -8  -3  -6   79.43    3.80
  -8  -3  -7   69.52    3.70
   8   3  11   90.10    4.50
  -8  -4   3   84.16    4.94
  -8  -4   2  131.78    5.61
  -8  -4   0  150.70    3.80
  -8  -4   0  144.45    5.07
  -8  -4  -1  120.40    3.84
  -8  -4  -1  123.12    4.83
  -8  -4  -2  163.22    4.61
  -8  -4  -2  169.42    5.49
  -8  -4  -3  132.38    4.38
  -8  -4  -4  205.08    5.37
  -8  -4  -5   96.17    4.02
  -8  -4  -6  152.21    4.88
   8   4  10  100.77    4.67
   8   4  11  131.32    5.17
  -8  -5   2   92.98    5.10
  -8  -5   0   82.61    3.15
  -8  -5  -1   67.55    3.20
  -8  -5  -2   89.31    3.73
  -8  -5  -3   56.44    3.32
  -8  -5  -4   83.27    3.84
   8   5  10   68.14    4.09
   8   5  11   78.05    4.28
  -8  -6   0   56.59    2.86
  -8  -6  -1   91.84    3.62
  -8  -6  -2   78.61    3.63
  -8  -6  -3   88.84    3.93
   8   6  10   42.67    3.54
   8   6  11   68.46    4.09
  -8  -7   0   53.79    2.89
  -8  -7  -1   65.89    3.35
  -8  -7  -2   72.31    3.63
  -9   0  -2   49.59    4.49
  -9   0  -3   60.08    4.69
  -9  -1   0   71.21    4.76
  -9  -1  -1   66.51    4.70
  -9  -1  -2   88.84    5.19
  -9  -1  -3   67.65    4.85
  -9  -2   1   40.67    4.10
  -9  -2   0   55.14    4.36
  -9  -2  -1   38.91    2.48
  -9  -2  -1   43.08    4.09
  -9  -2  -2   65.88    3.21
  -9  -2  -2   70.23    4.68
  -9  -2  -3   70.50    3.49
  -9  -2  -3   67.25    4.69
  -9  -2  -4   81.76    3.81
  -9  -2  -5   44.42    3.27
  -9  -2  -6   58.50    3.62
  -9  -2  -7   55.46    3.65
  -9  -2  -8   35.39    3.22
  -9  -3   1   77.22    4.68
  -9  -3   0  106.58    5.26
  -9  -3   0   97.42    5.01
  -9  -3  -1   62.37    4.39
  -9  -3  -2   93.57    4.98
  -9  -3  -3  136.53    4.45
  -9  -3  -3  127.03    5.57
  -9  -3  -4   94.17    4.06
  -9  -3  -6   61.60    3.69
  -9  -3  -7  112.87    4.62
  -9  -4  -3  101.43    4.04
  -9  -4  -3  105.03    5.05
  -9  -4  -4   70.69    3.74
  -9  -4  -5   99.74    4.27
  -9  -4  -6   89.56    4.20
  -9  -4  -7  145.62    5.11
  -9  -5  -4   80.50    3.96
  -9  -5  -5   61.09    3.69
  -9  -5  -6   70.34    3.94
  -9  -5  -7   83.69    4.23
   0   0   0    0.00    0.00
;
_shelx_hkl_checksum                55250
_olex2_submission_special_instructions  'No special instructions were received'
