# Supplementary material
Source: MDPI journal article supplement (https://www.mdpi.com/2073-4352/10/12/1122)
Supplement: s1 [file s1 › Compound_5.cif]

data_Compound_5_mo_seo3_5t
_audit_creation_date               2020-10-11
_audit_creation_method
;
Olex2 1.3
(compiled 2020.07.31 svn.rc2a77460 for OlexSys, GUI svn.r6145)
;
_shelx_SHELXL_version_number       '2018/3'
_audit_contact_author_address      ?
_audit_contact_author_email        ?
_audit_contact_author_name         ''
_audit_contact_author_phone        ?
_publ_contact_author_id_orcid      ?
_publ_section_references
;
Dolomanov, O.V., Bourhis, L.J., Gildea, R.J, Howard, J.A.K. & Puschmann, H.
 (2009), J. Appl. Cryst. 42, 339-341.

Sheldrick, G.M. (2015). Acta Cryst. C71, 3-8.
;
_chemical_name_common              ?
_chemical_name_systematic          ?
_chemical_formula_moiety           'Cs2 N4 O14 U'
_chemical_formula_sum              'Cs2 N4 O14 U'
_chemical_formula_weight           783.89
_chemical_melting_point            ?
_chemical_oxdiff_formula           'O8  Cl3  Se3  Cs2  U2  '
loop_
  _atom_type_symbol
  _atom_type_description
  _atom_type_scat_dispersion_real
  _atom_type_scat_dispersion_imag
  _atom_type_scat_source
 'Cs' 'Cs' -0.3680 2.1192
 'International Tables Vol C Tables 4.2.6.8 and 6.1.1.4'
 'N' 'N' 0.0061 0.0033 'International Tables Vol C Tables 4.2.6.8 and 6.1.1.4'
 'O' 'O' 0.0106 0.0060 'International Tables Vol C Tables 4.2.6.8 and 6.1.1.4'
 'U' 'U' -9.6767 9.6646 'International Tables Vol C Tables 4.2.6.8 and 6.1.1.4'

_shelx_space_group_comment
;
The symmetry employed for this shelxl refinement is uniquely defined
by the following loop, which should always be used as a source of
symmetry information in preference to the above space-group names.
They are only intended as comments.
;
_space_group_crystal_system        'monoclinic'
_space_group_IT_number             14
_space_group_name_H-M_alt          'P 1 21/n 1'
_space_group_name_Hall             '-P 2yn'
loop_
  _space_group_symop_operation_xyz
 'x, y, z'
 '-x+1/2, y+1/2, -z+1/2'
 '-x, -y, -z'
 'x-1/2, -y-1/2, z-1/2'

_cell_length_a                     6.6866(5)
_cell_length_b                     7.9932(4)
_cell_length_c                     12.6165(10)
_cell_angle_alpha                  90
_cell_angle_beta                   99.603(7)
_cell_angle_gamma                  90
_cell_volume                       664.87(8)
_cell_formula_units_Z              2
_cell_measurement_reflns_used      3834
_cell_measurement_temperature      293(2)
_cell_measurement_theta_max        35.9110
_cell_measurement_theta_min        2.9950
_shelx_estimated_absorpt_T_max     0.126
_shelx_estimated_absorpt_T_min     0.065
_exptl_absorpt_coefficient_mu      17.686
_exptl_absorpt_correction_T_max    1.00000
_exptl_absorpt_correction_T_min    0.24110
_exptl_absorpt_correction_type     multi-scan
_exptl_absorpt_process_details
;
CrysAlisPro 1.171.39.44a (Rigaku Oxford Diffraction, 2018)
Empirical absorption correction using spherical harmonics,
 implemented in SCALE3 ABSPACK scaling algorithm.
;
_exptl_absorpt_special_details     ?
_exptl_crystal_colour              'yellow'
_exptl_crystal_density_diffrn      3.916
_exptl_crystal_density_meas        ?
_exptl_crystal_density_method      ?
_exptl_crystal_description         'prism'
_exptl_crystal_F_000               684
_exptl_crystal_size_max            0.34
_exptl_crystal_size_mid            0.27
_exptl_crystal_size_min            0.2
_exptl_transmission_factor_max     ?
_exptl_transmission_factor_min     ?
_diffrn_reflns_av_R_equivalents    0.0322
_diffrn_reflns_av_unetI/netI       0.0271
_diffrn_reflns_Laue_measured_fraction_full  0.998
_diffrn_reflns_Laue_measured_fraction_max  0.997
_diffrn_reflns_limit_h_max         8
_diffrn_reflns_limit_h_min         -7
_diffrn_reflns_limit_k_max         10
_diffrn_reflns_limit_k_min         -10
_diffrn_reflns_limit_l_max         16
_diffrn_reflns_limit_l_min         -16
_diffrn_reflns_number              5896
_diffrn_reflns_point_group_measured_fraction_full  0.998
_diffrn_reflns_point_group_measured_fraction_max  0.997
_diffrn_reflns_theta_full          25.242
_diffrn_reflns_theta_max           27.499
_diffrn_reflns_theta_min           3.029
_diffrn_ambient_temperature        293(2)
_diffrn_detector                   'CCD plate'
_diffrn_detector_area_resol_mean   ?
_diffrn_measured_fraction_theta_full  0.998
_diffrn_measured_fraction_theta_max  0.997
_diffrn_measurement_details
;
List of Runs (angles in degrees, time in seconds):

  # Type    Start    End  Width  t~exp~   \w     \q     \k     \f   Frames
--------------------------------------------------------------------------
  1  \f     33.69 322.19   0.50   40.00 -52.22 -34.00  82.00    --   577
  2  \f   -360.00   9.50   0.50   39.99 -91.24 -34.00 -88.00    --   739
  3  \w    -74.50 -12.50   0.50   40.00    --  -34.00 102.00 134.00  124
;
_diffrn_measurement_device         'Bruker Kappa Apex II DUO CCD'
_diffrn_measurement_device_type   
 'Saxi-CrysAlisPro-abstract goniometer imported SAXI images'
_diffrn_measurement_method         '\w and \f scans'
_diffrn_orient_matrix_type        
 'CrysAlisPro convention (1999,Acta A55,543-557)'
_diffrn_orient_matrix_UB_11        -0.0306275000
_diffrn_orient_matrix_UB_12        0.0395042000
_diffrn_orient_matrix_UB_13        0.0449329000
_diffrn_orient_matrix_UB_21        -0.0395932000
_diffrn_orient_matrix_UB_22        -0.0771418000
_diffrn_orient_matrix_UB_23        0.0152021000
_diffrn_orient_matrix_UB_31        0.0953212000
_diffrn_orient_matrix_UB_32        -0.0191313000
_diffrn_orient_matrix_UB_33        0.0315660000
_diffrn_radiation_monochromator    graphite
_diffrn_radiation_probe            x-ray
_diffrn_radiation_type             'Mo K\a'
_diffrn_radiation_wavelength       0.71073
_diffrn_source                     'fine-focus sealed X-ray tube'
_diffrn_source_type                'Enhance (Mo) X-ray Source'
_reflns_Friedel_coverage           0.000
_reflns_Friedel_fraction_full      .
_reflns_Friedel_fraction_max       .
_reflns_number_gt                  1238
_reflns_number_total               1529
_reflns_special_details
;
 Reflections were merged by SHELXL according to the crystal
 class for the calculation of statistics and refinement.
 
 _reflns_Friedel_fraction is defined as the number of unique
 Friedel pairs measured divided by the number that would be
 possible theoretically, ignoring centric projections and
 systematic absences.
;
_reflns_threshold_expression       'I > 2\s(I)'
_computing_cell_refinement         'CrysAlisPro 1.171.39.44a (Rigaku OD, 2018)'
_computing_data_collection         'CrysAlisPro 1.171.39.44a (Rigaku OD, 2018)'
_computing_data_reduction          'CrysAlisPro 1.171.39.44a (Rigaku OD, 2018)'
_computing_molecular_graphics      'Olex2 1.3 (Dolomanov et al., 2009)'
_computing_publication_material    'Olex2 1.3 (Dolomanov et al., 2009)'
_computing_structure_refinement    'SHELXL 2018 (Sheldrick, 2015)'
_computing_structure_solution      'SHELXT 2018 (Sheldrick, 2015)'
_refine_diff_density_max           1.789
_refine_diff_density_min           -1.153
_refine_diff_density_rms           0.200
_refine_ls_extinction_coef         .
_refine_ls_extinction_method       none
_refine_ls_goodness_of_fit_ref     1.047
_refine_ls_hydrogen_treatment      undef
_refine_ls_matrix_type             full
_refine_ls_number_parameters       97
_refine_ls_number_reflns           1529
_refine_ls_number_restraints       0
_refine_ls_R_factor_all            0.0410
_refine_ls_R_factor_gt             0.0288
_refine_ls_restrained_S_all        1.047
_refine_ls_shift/su_max            0.000
_refine_ls_shift/su_mean           0.000
_refine_ls_structure_factor_coef   Fsqd
_refine_ls_weighting_details      
 'w=1/[\s^2^(Fo^2^)+(0.0426P)^2^] where P=(Fo^2^+2Fc^2^)/3'
_refine_ls_weighting_scheme        calc
_refine_ls_wR_factor_gt            0.0723
_refine_ls_wR_factor_ref           0.0774
_refine_special_details            ?
_olex2_refinement_description
;
;
_atom_sites_solution_hydrogens     .
_atom_sites_solution_primary       ?
_atom_sites_solution_secondary     ?
loop_
  _atom_site_label
  _atom_site_type_symbol
  _atom_site_fract_x
  _atom_site_fract_y
  _atom_site_fract_z
  _atom_site_U_iso_or_equiv
  _atom_site_adp_type
  _atom_site_occupancy
  _atom_site_site_symmetry_order
  _atom_site_calc_flag
  _atom_site_refinement_flags_posn
  _atom_site_refinement_flags_adp
  _atom_site_refinement_flags_occupancy
  _atom_site_disorder_assembly
  _atom_site_disorder_group
 U1 U 0.500000 0.500000 0.500000 0.02348(12) Uani 1 2 d S . P . .
 Cs1 Cs 0.66264(5) 1.01271(4) 0.33682(3) 0.03446(14) Uani 1 1 d . . . . .
 O1 O 0.6511(6) 0.5028(4) 0.3989(4) 0.0353(10) Uani 1 1 d . . . . .
 O2 O 0.6686(6) 0.7395(5) 0.5910(4) 0.0468(11) Uani 1 1 d . . . . .
 O3 O 0.9453(7) 0.7811(5) 0.7001(4) 0.0488(11) Uani 1 1 d . . . . .
 O4 O 0.9410(7) 0.7997(7) 0.5317(4) 0.0646(15) Uani 1 1 d . . . . .
 O5 O 0.3532(6) 0.7816(4) 0.4399(3) 0.0350(9) Uani 1 1 d . . . . .
 O6 O 0.1853(5) 0.5702(5) 0.3700(3) 0.0366(9) Uani 1 1 d . . . . .
 O7 O 0.0750(7) 0.8206(5) 0.3252(3) 0.0470(12) Uani 1 1 d . . . . .
 N1 N 0.8543(8) 0.7724(5) 0.6066(4) 0.0328(11) Uani 1 1 d . . . . .
 N2 N 0.1965(7) 0.7281(6) 0.3754(4) 0.0315(11) Uani 1 1 d . . . . .

loop_
  _atom_site_aniso_label
  _atom_site_aniso_U_11
  _atom_site_aniso_U_22
  _atom_site_aniso_U_33
  _atom_site_aniso_U_23
  _atom_site_aniso_U_13
  _atom_site_aniso_U_12
 U1 0.02055(18) 0.02412(17) 0.0251(2) -0.00052(11) 0.00182(12) -0.00085(10)
 Cs1 0.0275(3) 0.0389(2) 0.0360(3) -0.00354(16) 0.0024(2) -0.00169(15)
 O1 0.031(2) 0.046(2) 0.031(3) 0.0030(16) 0.0099(18) -0.0018(16)
 O2 0.031(2) 0.041(2) 0.065(3) -0.019(2) -0.001(2) -0.0003(19)
 O3 0.050(3) 0.055(3) 0.037(3) 0.006(2) -0.005(2) -0.010(2)
 O4 0.052(3) 0.098(4) 0.046(3) -0.009(3) 0.016(3) -0.018(3)
 O5 0.033(2) 0.0308(19) 0.041(3) -0.0028(16) 0.0047(19) -0.0010(16)
 O6 0.031(2) 0.033(2) 0.042(3) -0.0024(18) -0.0044(18) -0.0065(17)
 O7 0.046(3) 0.055(3) 0.038(3) 0.007(2) 0.002(2) 0.026(2)
 N1 0.038(3) 0.024(2) 0.036(3) -0.0015(19) 0.008(2) -0.008(2)
 N2 0.028(3) 0.036(2) 0.030(3) 0.001(2) 0.005(2) 0.001(2)

_geom_special_details
;
 All esds (except the esd in the dihedral angle between two l.s. planes)
 are estimated using the full covariance matrix.  The cell esds are taken
 into account individually in the estimation of esds in distances, angles
 and torsion angles; correlations between esds in cell parameters are only
 used when they are defined by crystal symmetry.  An approximate (isotropic)
 treatment of cell esds is used for estimating esds involving l.s. planes.
;
loop_
  _geom_bond_atom_site_label_1
  _geom_bond_atom_site_label_2
  _geom_bond_distance
  _geom_bond_site_symmetry_2
  _geom_bond_publ_flag
 U1 O1 1.754(4) 3_666 ?
 U1 O1 1.754(4) . ?
 U1 O2 2.413(4) 3_666 ?
 U1 O2 2.413(4) . ?
 U1 O5 2.521(4) . ?
 U1 O5 2.521(4) 3_666 ?
 U1 O6 2.506(4) . ?
 U1 O6 2.506(4) 3_666 ?
 Cs1 O1 3.412(4) 2_655 ?
 Cs1 O2 3.214(4) 3_676 ?
 Cs1 O3 3.196(4) 3_776 ?
 Cs1 O3 3.125(5) 4_575 ?
 Cs1 O4 3.249(5) 3_776 ?
 Cs1 O4 3.298(5) . ?
 Cs1 O5 3.206(4) . ?
 Cs1 O5 3.279(4) 3_676 ?
 Cs1 O6 3.226(4) 2 ?
 Cs1 O7 3.181(4) 1_655 ?
 Cs1 O7 3.417(5) 2 ?
 Cs1 N1 3.623(5) 3_776 ?
 O2 N1 1.252(6) . ?
 O3 N1 1.236(6) . ?
 O4 N1 1.209(7) . ?
 O5 N2 1.288(6) . ?
 O6 N2 1.266(6) . ?
 O7 N2 1.198(6) . ?

loop_
  _geom_angle_atom_site_label_1
  _geom_angle_atom_site_label_2
  _geom_angle_atom_site_label_3
  _geom_angle
  _geom_angle_site_symmetry_1
  _geom_angle_site_symmetry_3
  _geom_angle_publ_flag
 O1 U1 O1 180.0 3_666 . ?
 O1 U1 O2 86.80(16) . 3_666 ?
 O1 U1 O2 93.20(17) . . ?
 O1 U1 O2 93.20(17) 3_666 3_666 ?
 O1 U1 O2 86.80(16) 3_666 . ?
 O1 U1 O5 89.28(14) 3_666 . ?
 O1 U1 O5 89.28(14) . 3_666 ?
 O1 U1 O5 90.72(14) 3_666 3_666 ?
 O1 U1 O5 90.72(14) . . ?
 O1 U1 O6 92.54(17) . . ?
 O1 U1 O6 87.46(17) . 3_666 ?
 O1 U1 O6 92.54(17) 3_666 3_666 ?
 O1 U1 O6 87.46(17) 3_666 . ?
 O2 U1 O2 180.00(11) 3_666 . ?
 O2 U1 O5 64.04(14) 3_666 3_666 ?
 O2 U1 O5 115.96(14) 3_666 . ?
 O2 U1 O5 64.04(14) . . ?
 O2 U1 O5 115.96(14) . 3_666 ?
 O2 U1 O6 114.10(13) 3_666 3_666 ?
 O2 U1 O6 65.90(13) . 3_666 ?
 O2 U1 O6 114.10(13) . . ?
 O2 U1 O6 65.90(13) 3_666 . ?
 O5 U1 O5 180.0 3_666 . ?
 O6 U1 O5 50.29(12) . . ?
 O6 U1 O5 129.71(12) . 3_666 ?
 O6 U1 O5 129.71(12) 3_666 . ?
 O6 U1 O5 50.29(12) 3_666 3_666 ?
 O6 U1 O6 180.0 3_666 . ?
 O1 Cs1 O7 72.32(10) 2_655 2 ?
 O1 Cs1 N1 74.91(11) 2_655 3_776 ?
 O2 Cs1 O1 129.08(11) 3_676 2_655 ?
 O2 Cs1 O4 96.49(12) 3_676 3_776 ?
 O2 Cs1 O4 115.90(12) 3_676 . ?
 O2 Cs1 O5 47.55(11) 3_676 3_676 ?
 O2 Cs1 O6 72.75(11) 3_676 2 ?
 O2 Cs1 O7 56.77(11) 3_676 2 ?
 O2 Cs1 N1 106.62(10) 3_676 3_776 ?
 O3 Cs1 O1 57.13(11) 3_776 2_655 ?
 O3 Cs1 O1 72.86(11) 4_575 2_655 ?
 O3 Cs1 O2 109.90(11) 4_575 3_676 ?
 O3 Cs1 O2 110.14(11) 3_776 3_676 ?
 O3 Cs1 O3 128.64(6) 4_575 3_776 ?
 O3 Cs1 O4 100.14(12) 4_575 . ?
 O3 Cs1 O4 153.28(13) 4_575 3_776 ?
 O3 Cs1 O4 38.51(12) 3_776 3_776 ?
 O3 Cs1 O4 90.02(12) 3_776 . ?
 O3 Cs1 O5 61.23(11) 4_575 . ?
 O3 Cs1 O5 163.08(12) 3_776 . ?
 O3 Cs1 O5 140.55(11) 4_575 3_676 ?
 O3 Cs1 O5 90.67(11) 3_776 3_676 ?
 O3 Cs1 O6 56.94(11) 4_575 2 ?
 O3 Cs1 O6 107.87(11) 3_776 2 ?
 O3 Cs1 O7 94.82(12) 4_575 2 ?
 O3 Cs1 O7 81.50(11) 3_776 2 ?
 O3 Cs1 O7 86.49(12) 4_575 1_655 ?
 O3 Cs1 N1 141.48(11) 4_575 3_776 ?
 O3 Cs1 N1 19.63(10) 3_776 3_776 ?
 O4 Cs1 O1 94.05(11) 3_776 2_655 ?
 O4 Cs1 O1 113.27(11) . 2_655 ?
 O4 Cs1 O4 63.05(17) 3_776 . ?
 O4 Cs1 O5 58.03(11) 3_776 3_676 ?
 O4 Cs1 O7 103.38(12) 3_776 2 ?
 O4 Cs1 O7 164.99(11) . 2 ?
 O4 Cs1 N1 73.99(12) . 3_776 ?
 O4 Cs1 N1 19.29(11) 3_776 3_776 ?
 O5 Cs1 O1 146.06(9) 3_676 2_655 ?
 O5 Cs1 O1 133.96(9) . 2_655 ?
 O5 Cs1 O2 73.64(11) . 3_676 ?
 O5 Cs1 O4 73.88(11) . . ?
 O5 Cs1 O4 73.35(11) 3_676 . ?
 O5 Cs1 O4 125.82(11) . 3_776 ?
 O5 Cs1 O5 79.91(10) . 3_676 ?
 O5 Cs1 O6 89.04(10) . 2 ?
 O5 Cs1 O7 94.27(9) 3_676 2 ?
 O5 Cs1 O7 112.98(10) . 2 ?
 O5 Cs1 N1 75.44(10) 3_676 3_776 ?
 O5 Cs1 N1 143.87(11) . 3_776 ?
 O6 Cs1 O1 67.47(10) 2 2_655 ?
 O6 Cs1 O4 139.82(12) 2 3_776 ?
 O6 Cs1 O4 156.56(11) 2 . ?
 O6 Cs1 O5 120.09(10) 2 3_676 ?
 O6 Cs1 O7 38.08(9) 2 2 ?
 O6 Cs1 N1 126.21(11) 2 3_776 ?
 O7 Cs1 O1 60.22(10) 1_655 2_655 ?
 O7 Cs1 O2 162.59(12) 1_655 3_676 ?
 O7 Cs1 O3 60.25(13) 1_655 3_776 ?
 O7 Cs1 O4 53.09(11) 1_655 . ?
 O7 Cs1 O4 66.84(13) 1_655 3_776 ?
 O7 Cs1 O5 115.73(10) 1_655 3_676 ?
 O7 Cs1 O5 111.32(11) 1_655 . ?
 O7 Cs1 O6 123.04(10) 1_655 2 ?
 O7 Cs1 O7 129.82(6) 1_655 2 ?
 O7 Cs1 N1 59.11(12) 1_655 3_776 ?
 O7 Cs1 N1 94.97(10) 2 3_776 ?
 U1 O1 Cs1 166.5(2) . 2_645 ?
 U1 O2 Cs1 109.54(14) . 3_676 ?
 N1 O2 U1 127.9(3) . . ?
 N1 O2 Cs1 122.6(3) . 3_676 ?
 Cs1 O3 Cs1 98.67(13) 4_676 3_776 ?
 N1 O3 Cs1 100.1(3) . 3_776 ?
 N1 O3 Cs1 126.4(3) . 4_676 ?
 Cs1 O4 Cs1 116.95(16) 3_776 . ?
 N1 O4 Cs1 113.1(4) . . ?
 N1 O4 Cs1 98.1(4) . 3_776 ?
 U1 O5 Cs1 104.83(13) . 3_676 ?
 U1 O5 Cs1 113.03(13) . . ?
 Cs1 O5 Cs1 100.09(10) . 3_676 ?
 N2 O5 U1 97.4(3) . . ?
 N2 O5 Cs1 116.6(3) . . ?
 N2 O5 Cs1 124.7(3) . 3_676 ?
 U1 O6 Cs1 155.62(15) . 2_545 ?
 N2 O6 U1 98.8(3) . . ?
 N2 O6 Cs1 102.3(3) . 2_545 ?
 Cs1 O7 Cs1 93.15(12) 1_455 2_545 ?
 N2 O7 Cs1 94.5(3) . 2_545 ?
 N2 O7 Cs1 142.2(3) . 1_455 ?
 O2 N1 Cs1 163.5(3) . 3_776 ?
 O3 N1 Cs1 60.3(3) . 3_776 ?
 O3 N1 O2 118.7(5) . . ?
 O4 N1 Cs1 62.6(3) . 3_776 ?
 O4 N1 O2 120.5(6) . . ?
 O4 N1 O3 120.8(5) . . ?
 U1 N2 Cs1 113.54(13) . 2_545 ?
 O5 N2 U1 57.2(2) . . ?
 O5 N2 Cs1 166.1(3) . 2_545 ?
 O6 N2 U1 56.4(3) . . ?
 O6 N2 Cs1 58.2(3) . 2_545 ?
 O6 N2 O5 113.6(4) . . ?
 O7 N2 U1 179.7(4) . . ?
 O7 N2 Cs1 66.7(3) . 2_545 ?
 O7 N2 O5 122.5(5) . . ?
 O7 N2 O6 123.9(5) . . ?

loop_
  _geom_torsion_atom_site_label_1
  _geom_torsion_atom_site_label_2
  _geom_torsion_atom_site_label_3
  _geom_torsion_atom_site_label_4
  _geom_torsion
  _geom_torsion_site_symmetry_1
  _geom_torsion_site_symmetry_2
  _geom_torsion_site_symmetry_3
  _geom_torsion_site_symmetry_4
  _geom_torsion_publ_flag
 U1 O2 N1 Cs1 160.6(11) . . . 3_776 ?
 U1 O2 N1 O3 -117.6(5) . . . . ?
 U1 O2 N1 O4 64.5(7) . . . . ?
 U1 O5 N2 Cs1 -51.1(14) . . . 2_545 ?
 U1 O5 N2 O6 -0.3(5) . . . . ?
 U1 O5 N2 O7 -179.8(4) . . . . ?
 U1 O6 N2 Cs1 167.7(2) . . . 2_545 ?
 U1 O6 N2 O5 0.3(5) . . . . ?
 U1 O6 N2 O7 179.8(5) . . . . ?
 Cs1 O2 N1 Cs1 -16.5(16) 3_676 . . 3_776 ?
 Cs1 O2 N1 O3 65.2(6) 3_676 . . . ?
 Cs1 O2 N1 O4 -112.7(5) 3_676 . . . ?
 Cs1 O3 N1 Cs1 -108.8(4) 4_676 . . 3_776 ?
 Cs1 O3 N1 O2 -161.1(4) 3_776 . . . ?
 Cs1 O3 N1 O2 90.2(5) 4_676 . . . ?
 Cs1 O3 N1 O4 16.8(5) 3_776 . . . ?
 Cs1 O3 N1 O4 -91.9(6) 4_676 . . . ?
 Cs1 O4 N1 Cs1 -123.9(3) . . . 3_776 ?
 Cs1 O4 N1 O2 161.4(4) 3_776 . . . ?
 Cs1 O4 N1 O2 37.5(6) . . . . ?
 Cs1 O4 N1 O3 -140.4(4) . . . . ?
 Cs1 O4 N1 O3 -16.4(5) 3_776 . . . ?
 Cs1 O5 N2 U1 -113.8(3) 3_676 . . . ?
 Cs1 O5 N2 U1 120.4(3) . . . . ?
 Cs1 O5 N2 Cs1 69.3(14) . . . 2_545 ?
 Cs1 O5 N2 Cs1 -164.9(11) 3_676 . . 2_545 ?
 Cs1 O5 N2 O6 -114.2(4) 3_676 . . . ?
 Cs1 O5 N2 O6 120.0(4) . . . . ?
 Cs1 O5 N2 O7 -59.4(6) . . . . ?
 Cs1 O5 N2 O7 66.4(6) 3_676 . . . ?
 Cs1 O6 N2 U1 -167.7(2) 2_545 . . . ?
 Cs1 O6 N2 O5 -167.4(3) 2_545 . . . ?
 Cs1 O6 N2 O7 12.1(6) 2_545 . . . ?
 Cs1 O7 N2 Cs1 101.0(6) 1_455 . . 2_545 ?
 Cs1 O7 N2 O5 168.2(4) 2_545 . . . ?
 Cs1 O7 N2 O5 -90.7(7) 1_455 . . . ?
 Cs1 O7 N2 O6 -11.1(5) 2_545 . . . ?
 Cs1 O7 N2 O6 89.9(7) 1_455 . . . ?
 O2 U1 O1 Cs1 55.4(7) 3_666 . . 2_645 ?
 O2 U1 O1 Cs1 -124.6(7) . . . 2_645 ?
 O5 U1 O1 Cs1 -60.6(7) . . . 2_645 ?
 O5 U1 O1 Cs1 119.4(7) 3_666 . . 2_645 ?
 O6 U1 O1 Cs1 -10.3(7) . . . 2_645 ?
 O6 U1 O1 Cs1 169.7(7) 3_666 . . 2_645 ?

_shelx_res_file
;
TITL mo_seo3_5t_a.res in P2(1)/n
    mo_seo3_5t.res
    created by SHELXL-2018/3 at 01:02:01 on 11-Oct-2020
REM Old TITL mo_SeO3_5T in P2(1)/n
REM SHELXT solution in P2(1)/n
REM R1 0.065, Rweak 0.001, Alpha 0.037, Orientation as input
REM Formula found by SHELXT: O18 Cs2 U
CELL 0.71073 6.6866 7.9932 12.6165 90 99.603 90
ZERR 2 0.0005 0.0004 0.001 0 0.007 0
LATT 1
SYMM 0.5-X,0.5+Y,0.5-Z
SFAC Cs N O U
UNIT 4 8 28 2

L.S. 20
PLAN  10
SIZE 0.34 0.27 0.2
CONF
CONN 8 U1
bond $h
htab
list 4
MORE -1
fmap 2 53
acta
OMIT -4 55
OMIT 5 2 11
OMIT 4 0 10
OMIT 0 2 0
REM <olex2.extras>
REM <HklSrc "%.\\mo_SeO3_5T.hkl">
REM </olex2.extras>

WGHT    0.042600
FVAR       0.24943
U1    4    0.500000    0.500000    0.500000    10.50000    0.02055    0.02412 =
         0.02510   -0.00052    0.00182   -0.00085
CS1   1    0.662635    1.012705    0.336816    11.00000    0.02745    0.03893 =
         0.03600   -0.00354    0.00235   -0.00169
O1    3    0.651113    0.502766    0.398941    11.00000    0.03115    0.04585 =
         0.03052    0.00302    0.00989   -0.00178
O2    3    0.668595    0.739510    0.591018    11.00000    0.03105    0.04139 =
         0.06460   -0.01903   -0.00139   -0.00033
O3    3    0.945284    0.781088    0.700143    11.00000    0.05012    0.05486 =
         0.03717    0.00572   -0.00515   -0.01041
O4    3    0.940973    0.799709    0.531678    11.00000    0.05167    0.09824 =
         0.04646   -0.00936    0.01586   -0.01778
O5    3    0.353241    0.781618    0.439883    11.00000    0.03312    0.03082 =
         0.04070   -0.00276    0.00473   -0.00100
O6    3    0.185272    0.570196    0.370043    11.00000    0.03141    0.03283 =
         0.04201   -0.00245   -0.00438   -0.00654
O7    3    0.075033    0.820610    0.325209    11.00000    0.04597    0.05501 =
         0.03828    0.00738    0.00165    0.02577
N1    2    0.854256    0.772386    0.606633    11.00000    0.03823    0.02449 =
         0.03614   -0.00149    0.00791   -0.00752
N2    2    0.196502    0.728112    0.375419    11.00000    0.02767    0.03631 =
         0.03048    0.00055    0.00473    0.00148
HKLF 4


REM  mo_seo3_5t_a.res in P2(1)/n
REM wR2 = 0.0774, GooF = S = 1.047, Restrained GooF = 1.047 for all data
REM R1 = 0.0288 for 1238 Fo > 4sig(Fo) and 0.0410 for all 1529 data
REM 97 parameters refined using 0 restraints

END

WGHT      0.0426      0.0000

REM No hydrogen bonds found for HTAB generation

REM Highest difference peak  1.789,  deepest hole -1.153,  1-sigma level  0.200
Q1    1   0.5075  0.4997  0.5719  11.00000  0.05    1.79
Q2    1   0.6141  0.5347  0.5165  11.00000  0.05    1.37
Q3    1   0.6644  1.0078  0.4047  11.00000  0.05    1.30
Q4    1   0.6481  1.0154  0.2601  11.00000  0.05    0.95
Q5    1   0.7879  1.0412  0.3546  11.00000  0.05    0.91
Q6    1   0.3175  0.5035  0.4299  11.00000  0.05    0.90
Q7    1   0.5578  0.6061  0.5923  11.00000  0.05    0.75
Q8    1   0.5297  0.4107  0.3645  11.00000  0.05    0.74
Q9    1   0.4465  0.5978  0.4036  11.00000  0.05    0.66
Q10   1   0.8580  0.9971  0.4212  11.00000  0.05    0.63
;
_shelx_res_checksum                67382
_shelx_hkl_file
;
   0   0   2  539.56    6.79
   0   0  -2  563.17    5.12
   0   0   2  545.53    5.38
   0   0  -3    0.17    0.98
   0   0  -3   -0.07    1.09
   0   0   3   -0.29    1.99
   0   0   3   -1.11    1.23
   0   0   4  119.46    3.82
   0   0  -4  115.19    3.48
   0   0  -4  119.96    3.58
   0   0   4  130.94    6.00
   0   0  -5    1.06    1.38
   0   0  -5    0.60    1.35
   0   0   5    0.01    1.39
   0   0   5   -0.80    3.23
   0   0  -6 3362.61   21.95
   0   0   6 3405.95   24.41
   0   0   7   -0.17    4.02
   0   0   7    0.23    1.97
   0   0  -7    0.62    1.67
   0   0   8  202.92   12.06
   0   0  -8  189.62    6.38
   0   0   8  176.22    7.57
   0   0  -9   -1.05    2.01
   0   0   9    3.98    5.39
   0   0   9    0.18    2.63
   0   0  10   77.29   10.25
   0   0  11    4.83    7.05
   0   0  12  850.70   32.88
   0   0  13   -4.65    8.89
   0   0  14   59.35   15.16
   0   0  15   -2.15   10.70
   0   0  16   28.50   14.47
   0   0  17   -3.71   14.33
   0   0  18  180.15   24.74
   0   0  19   14.05   16.82
   0   0  20    4.07   23.13
   0   1   0    1.06    1.15
   0  -1   0    0.31    0.46
   0  -1   0    0.13    0.50
   0  -1   0   -0.13    0.51
   0  -1   0    0.60    1.18
   0   1   1  329.07    4.01
   0  -1  -1  341.19    3.95
   0  -1  -1  347.12    3.47
   0   1  -1  324.25    4.75
   0  -1   1  359.55    3.97
   0   1   1  313.61    5.66
   0   1   1  343.73    3.51
   0  -1   1  375.45    3.89
   0  -1  -2   11.68    1.00
   0  -1   2    9.47    1.29
   0  -1   2    9.25    1.22
   0   1   2   11.87    1.09
   0  -1  -2   11.40    1.18
   0   1  -2    6.36    1.44
   0  -1   2    5.45    1.66
   0   1   2   11.41    2.02
   0   1  -2    5.26    1.27
   0   1   2   11.75    5.76
   0   1   2   11.66    1.25
   0   1  -3 5391.94   22.35
   0  -1   3 5535.94   24.09
   0   1   3 5472.86   19.07
   0  -1  -3 5488.79   19.02
   0  -1   3 5496.97   23.00
   0   1   3 5454.98   26.79
   0  -1   3 5485.93   25.88
   0  -1  -3 5434.61   20.57
   0   1   3 5494.35   21.35
   0   1  -3 5484.14   24.64
   0  -1  -4    1.04    1.12
   0   1   4    2.05    1.48
   0   1  -4    1.66    1.39
   0  -1   4    1.64    1.83
   0   1   4    3.65    1.36
   0  -1  -4    1.53    1.17
   0  -1   4    1.18    1.85
   0   1  -4    1.41    1.40
   0   1   4    0.69    1.82
   0   1   4    0.39    4.52
   0  -1  -5   37.22    2.31
   0  -1  -5   37.02    2.44
   0   1  -5   33.53    2.51
   0  -1   5   41.23    3.57
   0   1   5   33.02    2.13
   0   1   5   27.44    2.71
   0   1   5   18.59    5.23
   0   1   5   31.43    2.63
   0  -1   5   35.68    3.48
   0  -1  -6   12.84    1.85
   0  -1   6   13.38    2.94
   0   1   6   14.84    2.32
   0   1   6   10.04    5.69
   0  -1   6   24.57    3.41
   0   1   6   20.24    1.83
   0   1   6   16.66    2.06
   0   1  -6   21.38    2.47
   0  -1  -6   21.62    2.17
   0  -1   7   66.08    5.72
   0   1   7   86.80    4.41
   0  -1  -7  104.95    4.46
   0  -1   7   89.99    6.00
   0   1   7   85.01    9.80
   0   1  -7   88.13    4.38
   0  -1  -7   84.04    3.85
   0  -1   8   13.20    4.08
   0  -1   8    3.28    3.39
   0  -1  -8   11.34    2.34
   0   1  -8    9.91    2.43
   0   1   8    5.81    6.26
   0   1   8    6.53    2.50
   0  -1  -9 2315.60   22.44
   0  -1   9 2337.16   34.00
   0  -1   9 2206.96   32.67
   0   1   9 2310.47   47.88
   0   1  -9 2218.99   23.31
   0   1  10   10.13    8.26
   0  -1 -10    1.39    2.19
   0  -1  10    4.51    4.97
   0   1  11  142.69   17.91
   0  -1  11  123.70   11.81
   0   1  12    2.86    9.64
   0  -1  12    5.87    6.27
   0  -1  13    6.77    7.54
   0   1  13   13.29   13.05
   0   1  14    0.10   11.65
   0  -1  14    2.17    8.25
   0  -1  15  401.11   26.51
   0   1  15  433.23   34.45
   0   1  16   29.34   17.35
   0  -1  16  -17.43   12.93
   0   1  17   33.16   21.71
   0  -1  17   54.03   16.01
   0   1  18   18.53   21.54
   0  -1  18    4.50   12.75
   0   1  19  -33.31   22.87
   0  -1  19   -6.85   15.20
   0  -1  20   21.53   15.59
   0   1  20   -5.79   24.76
   0   2   0 2423.93   17.71
   0  -2   0 2219.04   16.41
   0  -2   1   84.86    2.45
   0  -2  -1   77.94    2.89
   0  -2   1   65.98    3.03
   0   2   1   80.35    4.06
   0  -2  -1   80.30    2.47
   0  -2   1   92.89    2.89
   0  -2   1   90.75    2.88
   0   2  -1   76.51    3.89
   0  -2   2  121.62    3.44
   0   2  -2  114.29    4.56
   0   2  -2  139.09    5.54
   0  -2   2  101.38    3.45
   0  -2   2  124.82    3.61
   0  -2  -2  111.95    3.50
   0   2   2   97.35    4.66
   0  -2  -2  119.50    3.11
   0  -2   2  116.85    3.60
   0  -2   3    9.71    1.59
   0   2   3   11.82    8.08
   0  -2  -3    9.78    1.44
   0   2  -3    9.08    2.16
   0   2   3   12.58    2.79
   0   2  -3   12.54    2.34
   0  -2   3   10.75    1.74
   0  -2  -3   13.27    1.70
   0   2   4   63.98    4.19
   0  -2   4   78.40    5.16
   0   2   4   88.27    3.22
   0   2  -4   84.08    3.92
   0  -2  -4   83.92    3.14
   0  -2   4   96.15    4.11
   0  -2  -4   80.28    3.40
   0  -2   4   93.52    4.04
   0  -2  -5   32.07    2.51
   0  -2   5   33.22    3.02
   0  -2   5   30.92    3.96
   0   2   5   14.68   11.00
   0   2  -5   28.37    2.85
   0   2   5   28.00    3.25
   0   2   5   28.45    2.28
   0  -2  -5   30.69    2.19
   0  -2   6 3498.66   31.36
   0  -2  -6 3381.03   22.75
   0   2   6 3337.91   20.86
   0  -2   6 3337.87   27.26
   0  -2  -6 3324.38   21.24
   0   2   6 3422.15   26.34
   0  -2  -7    0.37    1.64
   0   2   7    2.41    1.83
   0   2  -7   -1.90    1.96
   0   2   7   -2.78    8.99
   0   2   7    0.53    2.27
   0  -2   7   -0.51    2.60
   0  -2  -7    1.13    1.59
   0  -2   7    3.51    3.03
   0  -2  -8  362.21    8.61
   0   2   8  366.57    5.96
   0   2   8  372.89    6.40
   0  -2  -8  380.87    8.47
   0   2  -8  327.84    9.08
   0  -2   8  358.52   11.91
   0   2   8  329.33   26.99
   0  -2   8  385.72   12.26
   0   2  -9    4.62    2.54
   0  -2  -9    9.05    2.33
   0  -2   9    9.00    3.91
   0  -2   9    2.83    3.57
   0  -2  10   20.67    4.64
   0  -2 -10   22.29    3.04
   0   2  10   25.45   14.39
   0   2  11    3.18   12.34
   0  -2  11   -3.06    4.56
   0   2  12  871.57   51.29
   0  -2  12  922.59   26.50
   0   2  13  -16.41   17.83
   0  -2  13    8.04    6.79
   0   2  14   27.63   21.48
   0  -2  14  114.61   13.95
   0  -2  15   15.37    8.78
   0   2  15   20.03   19.80
   0   2  16  -15.95   25.00
   0  -2  16   -1.25   10.31
   0   2  17   42.75   28.35
   0  -2  17   -9.06   10.87
   0  -2  18  105.73   18.93
   0   2  18   37.40   34.33
   0  -2  19   -8.87   13.29
   0   2  19   94.78   38.39
   0   2  20   32.14   33.39
   0  -2  20   57.58   19.21
   0  -3   0    0.56    1.33
   0  -3   0   -0.36    1.34
   0   3   0   -0.08    2.83
   0  -3   1  707.67    9.48
   0  -3   1  704.24    8.21
   0   3   1  647.80   13.02
   0   3  -1  709.09   13.00
   0  -3  -1  641.37    9.22
   0  -3   1  738.47    9.29
   0  -3  -1  681.05    8.30
   0  -3   1  662.68   11.93
   0  -3  -2    0.67    1.17
   0  -3   2   -0.12    2.11
   0   3   2    0.93    2.88
   0  -3  -2    0.35    1.48
   0  -3   2    0.49    1.88
   0   3  -2    2.00    2.58
   0  -3   2    4.92    1.49
   0  -3   2    5.13    1.39
   0   3  -3 3646.73   28.40
   0  -3  -3 3660.64   22.67
   0  -3   3 3689.16   20.93
   0  -3   3 3586.05   20.70
   0  -3   3 3702.47   19.42
   0   3  -3 3769.62   30.93
   0  -3   3 3666.77   22.64
   0  -3  -3 3666.00   20.07
   0   3   4   33.45    4.05
   0  -3   4   49.99    3.25
   0  -3  -4   41.64    2.80
   0   3  -4   42.43    3.80
   0  -3   4   41.59    2.84
   0  -3  -4   44.14    2.72
   0   3  -4   48.22    3.82
   0  -3   5  237.83    7.19
   0  -3  -5  261.27    6.79
   0   3   5  260.50    6.12
   0   3  -5  232.43    7.58
   0  -3   5  233.14    6.91
   0   3   5  233.43    8.67
   0  -3  -5  263.45    6.14
   0  -3   6    2.34    2.34
   0  -3  -6    4.42    1.80
   0   3   6    1.59    2.95
   0   3   6    2.94    1.73
   0  -3   6    2.04    1.97
   0   3  -6    2.14    2.65
   0  -3   6    9.45    3.88
   0  -3  -6    1.89    1.45
   0   3   7   34.30    4.19
   0  -3  -7   23.85    2.72
   0  -3   7   24.45    5.22
   0   3  -7   30.22    3.60
   0  -3  -7   21.42    2.42
   0   3   7   26.26    2.83
   0  -3   7   30.70    3.84
   0   3  -8   55.27    4.57
   0  -3  -8   57.01    3.97
   0  -3  -8   63.65    3.91
   0   3   8   70.42    3.95
   0  -3   8   51.60    4.92
   0   3   8   59.02    4.69
   0   3   8   66.95   20.52
   0  -3   8   63.38    7.20
   0  -3  -9 1447.28   17.77
   0   3   9 1493.41   15.21
   0   3   9 1448.10   13.74
   0  -3  10   19.80    4.84
   0  -3 -10   21.41    3.14
   0   3  11  112.14   31.42
   0  -3  11  169.17   10.41
   0   3  12   17.49   20.10
   0  -3  12    2.08    4.62
   0  -3  13    5.71    5.59
   0   3  13   22.88   27.76
   0   3  14   -1.92   23.58
   0  -3  14   -8.17    7.31
   0  -3  15  244.71   17.46
   0   3  15  143.85   54.84
   0  -3  16    8.81    8.05
   0   3  16    7.04   30.17
   0   3  17   17.30   27.78
   0  -3  17   29.53   11.87
   0  -3  18   -4.60   10.37
   0   3  18  -27.35   29.67
   0   3  19   -8.00   36.26
   0  -3  19   -0.40   11.20
   0  -4   0 6134.52   32.51
   0   4   0 6166.65   45.37
   0  -4   0 6252.05   29.17
   0  -4   1  142.78    5.13
   0  -4  -1  141.94    4.70
   0  -4   1  149.44    4.99
   0  -4   1  129.91    6.33
   0   4   1  130.18    7.21
   0   4  -1  155.12    7.71
   0  -4  -1  134.79    5.13
   0  -4  -1  151.95    4.98
   0  -4   1  143.15    4.52
   0  -4  -2  352.36    8.08
   0  -4   2  327.69    6.76
   0  -4  -2  331.50    6.96
   0   4  -2  322.05   10.70
   0  -4   2  319.64    9.00
   0  -4   2  367.36    7.84
   0   4   2  324.26   10.97
   0  -4   2  340.14    7.76
   0  -4   3    8.56    2.33
   0  -4   3   10.05    2.16
   0  -4   3    7.52    1.86
   0  -4  -3   13.99    2.02
   0  -4   3    8.77    2.18
   0   4  -3    9.01    3.38
   0  -4  -3   11.13    2.09
   0   4   3   10.63    3.40
   0  -4  -4   13.73    2.47
   0   4  -4   21.76    3.63
   0  -4  -4   14.11    2.13
   0   4  -4   17.29    3.52
   0  -4   4   18.26    2.61
   0   4   4   17.48    3.86
   0  -4   4   21.35    2.42
   0  -4  -5  112.09    4.43
   0  -4   5   76.94    3.94
   0   4  -5   86.61    5.62
   0  -4  -5  115.57    5.22
   0   4   5   99.73    6.89
   0  -4   5   98.54    4.94
   0  -4  -6 1533.76   16.16
   0   4  -6 1476.04   22.08
   0   4   6 1544.61   16.65
   0  -4  -6 1512.05   18.17
   0  -4   6 1487.00   19.92
   0  -4   6 1423.74   18.20
   0   4   6 1483.29   23.77
   0   4   7   54.25   16.80
   0   4   7   35.83    3.26
   0  -4   7   36.29    4.05
   0  -4  -7   46.87    3.79
   0   4  -7   42.54    4.62
   0  -4   7   33.99    3.69
   0   4   7   49.14    5.37
   0  -4  -7   37.81    3.20
   0  -4   8  147.12    7.68
   0   4   8  169.28    8.04
   0  -4  -8  163.63    6.16
   0   4   8  182.80    6.59
   0   4   8  178.71   24.26
   0   4   9    1.04    2.51
   0  -4  -9   -0.05    2.01
   0   4   9    4.17    3.16
   0  -4   9   -1.30    3.62
   0   4   9   -0.80   16.41
   0   4  10   72.92    3.46
   0  -4 -10   81.74    4.96
   0   4  10   77.10    3.81
   0  -4  10   55.77    6.07
   0  -4  11   40.57    6.38
   0   4  11   38.82   24.63
   0  -4 -11   39.70    4.17
   0  -4  12  470.04   17.50
   0   4  12  424.78   51.07
   0  -4  13    6.05    6.04
   0   4  13   -7.14   25.30
   0  -4  14   55.48    8.67
   0   4  14   41.55   27.66
   0  -4  15   -2.60    6.63
   0   4  15    2.78   27.46
   0  -4  16   23.16    9.25
   0   4  16   38.96   33.11
   0  -4  17    4.27    8.40
   0  -4  18   82.68   14.90
   0  -4  19   14.28   10.50
   0  -5   0    5.77    3.54
   0  -5   0    1.36    1.98
   0   5   0    2.35    3.77
   0  -5   0    1.79    2.23
   0   5   1   50.72    5.99
   0  -5  -1   57.92    3.92
   0  -5   1   57.17    5.39
   0  -5   1   58.89    3.98
   0  -5   1   62.28    3.99
   0   5  -1   61.77    6.21
   0  -5  -1   46.81    3.71
   0  -5   1   57.24    3.41
   0  -5   2  100.20    4.98
   0  -5   2   95.07    4.31
   0  -5   2  104.46    5.26
   0  -5  -2  105.57    5.32
   0   5  -2   95.71    7.28
   0  -5   2   78.88    5.26
   0   5   2   93.57    7.52
   0  -5  -2  108.41    4.64
   0  -5   3 2428.50   21.61
   0   5   3 2236.78   32.13
   0  -5  -3 2346.37   20.29
   0  -5   3 2249.11   22.25
   0  -5   3 2332.62   23.14
   0   5  -3 2312.52   31.31
   0  -5  -3 2316.93   23.41
   0  -5   3 2376.41   20.10
   0  -5  -4   79.87    4.22
   0   5  -4   90.03    6.73
   0  -5   4   83.65    4.45
   0  -5  -4   86.52    5.02
   0  -5   4   80.23    4.90
   0   5   4   79.29    6.98
   0   5  -4   86.46    7.19
   0   5  -5   77.93    6.14
   0   5   5   75.28    7.08
   0  -5   5   73.87    4.37
   0  -5  -5   78.74    4.94
   0  -5  -5   76.12    4.25
   0  -5   5   61.90    4.51
   0  -5   6    2.86    2.73
   0   5   6   -1.41    3.91
   0  -5   6    1.33    2.21
   0   5  -6    1.03    3.57
   0  -5  -6   -0.16    2.16
   0  -5  -6    2.46    1.99
   0  -5  -7   60.93    4.24
   0  -5   7   72.40    5.09
   0  -5   7   68.27    5.43
   0   5   7   78.65    6.90
   0  -5   8   11.37    3.45
   0   5   8   12.35    4.59
   0  -5  -8   19.70    3.10
   0  -5  -9 1004.31   15.81
   0   5   9  995.07   19.14
   0   5  10   50.54    5.11
   0  -5  10   39.57    5.35
   0  -5 -10   47.10    4.34
   0   5  10   47.02    4.22
   0   5  11  117.09   26.97
   0  -5 -11  116.74    6.37
   0  -5  11  106.07    8.68
   0   5  12   -6.81   23.60
   0  -5  12    0.11    4.90
   0   5  13   36.12   29.28
   0  -5  13   24.47    7.01
   0  -5  14   13.42    6.72
   0   5  14   17.86   29.78
   0   5  15   80.83   40.74
   0  -5  15  124.55   11.61
   0  -5  16   -4.91    6.86
   0   5  16   38.32   31.22
   0  -5  17   22.33    9.32
   0  -5  18    7.22   10.77
   0  -6   0 1271.39   18.82
   0  -6   0 1383.22   17.85
   0  -6   0 1236.07   23.34
   0   6   0 1357.27   27.48
   0   6  -1  150.91    9.97
   0  -6   1  120.57    7.62
   0  -6   1  157.77    6.51
   0  -6  -1  113.70    5.37
   0  -6  -1  110.79    5.96
   0  -6   1  141.11    6.68
   0   6   1  132.12    9.25
   0  -6   1  137.86    5.59
   0  -6  -2  122.31    6.33
   0  -6   2  118.89    5.79
   0   6   2  119.60    9.28
   0  -6   2  106.69    6.88
   0  -6  -2  143.64    6.41
   0  -6   2   95.89    5.54
   0  -6  -2  136.74    6.06
   0   6  -2  136.82    9.50
   0  -6   2  114.57    5.16
   0  -6  -3   -0.03    2.30
   0  -6   3   -0.86    2.49
   0  -6   3   -0.26    2.48
   0  -6  -3   -0.89    2.13
   0  -6   3   -1.10    2.67
   0  -6   3    0.35    2.62
   0   6  -3    0.76    4.27
   0   6   3    2.59    4.49
   0  -6   4  140.42    6.86
   0  -6  -4  133.52    6.63
   0  -6   4  137.22    5.85
   0   6  -4  154.29    9.69
   0  -6  -4  131.17    5.80
   0   6   4  137.28    9.53
   0  -6  -5   91.82    4.94
   0  -6   5   80.97    4.93
   0  -6   5   81.15    5.59
   0  -6  -5   92.23    5.96
   0   6   5   77.59    7.77
   0   6  -5   94.01    8.06
   0  -6   6 1065.59   19.00
   0  -6  -6 1091.81   16.12
   0  -6   6  996.97   15.93
   0   6   6 1070.62   23.63
   0  -6   7   26.22    4.38
   0   6   7   18.11    5.01
   0  -6   7   17.51    3.28
   0  -6  -7   18.89    3.18
   0  -6   8   79.28    6.41
   0  -6   8   83.24    5.96
   0   6   8  103.96    7.92
   0  -6  -8   91.70    5.52
   0   6   9    2.72    4.12
   0  -6   9    1.13    3.23
   0  -6  -9    5.06    2.71
   0  -6 -10   26.79    3.65
   0   6  10   33.86    5.39
   0  -6  10   23.36    5.00
   0  -6 -11    2.82    2.79
   0   6  11    2.95    2.39
   0   6  11    1.44    2.07
   0  -6  11    8.40    4.88
   0  -6  12  321.02   15.20
   0  -6 -12  332.20   10.96
   0  -6  13   11.28    5.83
   0  -6  14   41.66    7.60
   0  -6  15   -2.55    6.94
   0  -6  16    2.65    6.86
   0  -6  17  -10.63    8.90
   0  -6  18   72.98   13.37
   0   7   0    2.44    5.14
   0  -7   0   -1.39    2.71
   0  -7   0    2.69    2.88
   0  -7   0   -0.35    2.28
   0  -7   1  147.37    6.30
   0  -7   1  155.86    7.11
   0  -7  -1  147.32    7.33
   0   7   1  131.72   10.14
   0  -7  -1  148.18    6.82
   0   7  -1  161.75   11.43
   0  -7   1  159.21    7.82
   0   7  -2   33.32    6.41
   0  -7   2   42.92    4.59
   0   7   2   43.08    7.54
   0  -7  -2   29.36    3.73
   0  -7   2   33.04    4.19
   0  -7   2   33.59    4.81
   0  -7   2   26.77    3.50
   0  -7  -2   39.62    4.52
   0   7  -3 1094.53   27.15
   0  -7   3  954.54   18.68
   0   7   3 1025.66   25.84
   0  -7   3 1004.27   13.05
   0  -7  -3 1101.28   17.48
   0  -7   3  975.92   14.04
   0  -7  -3 1079.38   18.06
   0  -7  -3 1040.17   18.62
   0  -7   3 1077.20   16.94
   0  -7  -4   36.86    3.82
   0  -7   4   46.53    4.97
   0  -7  -4   40.75    4.47
   0   7  -4   47.50    7.15
   0   7   4   43.97    7.42
   0  -7   4   50.94    4.24
   0  -7   5  130.25    7.54
   0  -7  -5  126.20    6.30
   0  -7   5  117.77    6.17
   0   7   5  106.89    8.90
   0   7   6    0.89    4.72
   0  -7   6   -1.60    2.19
   0  -7   6    0.87    3.26
   0  -7  -6    1.68    2.75
   0  -7  -7    8.18    3.01
   0  -7   7   11.07    4.38
   0   7   7   17.91    5.31
   0  -7   7    9.75    2.90
   0  -7   8   35.71    4.57
   0   7   8   34.58    6.26
   0  -7  -8   38.77    4.20
   0  -7   8   39.17    5.42
   0   7   9  379.37   14.45
   0  -7  -9  350.39   10.98
   0  -7   9  346.57   13.84
   0   7  10    1.49    4.44
   0  -7  10   11.76    4.62
   0  -7 -10    0.73    2.85
   0   7  11   76.04    5.33
   0  -7  11   95.62    8.79
   0  -7 -11   89.28    6.36
   0  -7  12   -2.37    4.87
   0  -7 -12   -1.52    3.41
   0  -7 -13   12.99    4.35
   0  -7  13   11.85    5.94
   0  -7  14    0.95    5.91
   0  -7  15   55.22    9.77
   0  -7  16   29.71    9.17
   0  -7  17    6.95    7.74
   0  -8   0  682.95   14.38
   0  -8   0  665.96   16.75
   0   8   0  715.83   24.07
   0  -8   1   30.01    3.86
   0  -8  -1   18.37    3.88
   0   8   1   23.21    6.52
   0  -8   1   34.05    4.93
   0  -8  -1   22.38    4.12
   0  -8   1   31.31    4.51
   0   8  -1   16.17    6.16
   0   8   2  143.02   11.52
   0  -8   2  119.09    6.50
   0  -8  -2  118.19    7.59
   0   8  -2  115.20   11.49
   0  -8   2  106.43    6.78
   0  -8   2  116.33    7.61
   0  -8  -2  116.29    6.83
   0  -8   2  121.18    6.21
   0  -8  -3    0.34    2.85
   0   8   3    9.83    6.06
   0  -8   3    1.72    3.41
   0   8  -3   -2.29    6.16
   0  -8   3   -1.01    2.67
   0  -8   4   45.82    4.47
   0   8   4   48.84    7.82
   0  -8  -4   39.66    4.89
   0  -8  -4   28.07    4.92
   0  -8   4   39.95    5.08
   0  -8   5   15.77    3.36
   0  -8  -5   13.86    3.53
   0   8   5   17.83    6.46
   0  -8   5   11.94    4.02
   0  -8  -5   15.20    3.27
   0   8   6  314.57   14.91
   0  -8   6  327.45   12.71
   0  -8  -6  301.04    9.99
   0  -8   7   32.72    4.24
   0  -8  -7   32.87    4.32
   0  -8   7   26.74    5.10
   0   8   7   25.04    6.14
   0  -8   8   65.09    7.04
   0   8   8   77.92    8.62
   0  -8  -8   86.50    5.99
   0   8   9   -4.37    5.94
   0  -8  -9    4.32    3.23
   0  -8   9   -1.57    4.79
   0  -8 -10   32.71    4.45
   0  -8  10   32.02    6.23
   0   8  10   35.75    6.18
   0  -8  11   17.52    5.35
   0   8  11   27.12    4.75
   0  -8 -11   14.49    4.05
   0  -8  12  132.00   11.00
   0  -8 -12  128.63    7.90
   0  -8 -13    7.79    4.06
   0  -8  13   14.34    6.75
   0  -8  14   12.56    6.67
   0  -8 -14   31.93    5.20
   0  -8  15   10.01    7.54
   0  -8 -15   -6.23    4.34
   0  -8  16   15.66    8.69
   0  -9   0    2.90    3.18
   0  -9   0    0.61    3.59
   0   9   0   -6.18    7.93
   0  -9   0   -1.43    3.66
   0   9   1   53.14    9.29
   0  -9   1   61.80    5.33
   0  -9   1   62.76    6.24
   0  -9   1   52.77    5.22
   0  -9  -1   59.81    5.42
   0  -9  -1   50.17    5.27
   0   9  -1   66.10   11.00
   0  -9  -2   51.13    5.24
   0   9   2   38.88    9.02
   0   9  -2   61.46   10.69
   0  -9   2   46.86    5.75
   0  -9   3  314.80   12.92
   0  -9  -3  326.45   11.15
   0   9   3  356.41   18.14
   0   9   4   13.20    6.80
   0  -9  -4   19.24    4.09
   0  -9   4   27.67    5.13
   0  -9   5   53.55    6.47
   0  -9  -5   62.32    5.81
   0  -9  -6   -0.91    3.18
   0  -9   6   -3.46    3.83
   0  -9  -6   -2.80    3.85
   0  -9   7   44.70    6.47
   0   9   7   27.99    7.22
   0  -9  -7   36.66    5.16
   0  -9  -7   37.45    4.88
   0  -9  -8   21.77    4.31
   0  -9   8    7.92    5.38
   0   9   8   12.55    6.06
   0  -9   9  147.40   11.11
   0  -9  -9  155.07    8.51
   0   9   9  157.56   10.67
   0   9  10   20.20    5.66
   0  -9  10   11.02    5.23
   0  -9 -10   21.01    4.64
   0  -9 -11   43.70    5.56
   0  -9  11   52.23    8.00
   0  -9  12   -0.21    6.11
   0  -9 -12    0.02    4.03
   0  -9 -13    3.14    4.28
   0  -9  13   13.46    6.47
   0  -9 -14   10.47    4.68
   0  -9  14   -4.73    6.76
   0  -9  15   19.94    8.32
   0  -9 -15   29.54    5.75
   0 -10   0  200.91    8.15
   0  10   0  310.40   19.79
   0 -10  -1   29.06    4.83
   0  10  -1   24.69    9.33
   0  10  -2   67.25   12.82
   0 -10  -2   49.62    5.76
   0  10   2   41.49    9.46
   0  10   3    0.51    7.10
   0 -10  -3    2.17    3.65
   0 -10  -4   37.36    5.10
   0  10   4   36.96    8.76
   0 -10   4   20.91    5.41
   0 -10  -5   25.06    4.75
   0 -10   5   19.33    6.02
   0  10   5   25.51    7.78
   0  10   6  128.08   11.88
   0 -10   6  145.88   11.06
   0 -10  -6  145.60    8.46
   0  10   7    3.54    6.35
   0 -10  -7    1.59    4.03
   0 -10  -8   43.97    5.71
   0 -10   8   43.20    7.57
   0  10   8   45.39    7.72
   0 -10  -8   31.42    5.44
   0 -10  -9   -6.23    4.08
   0 -10  -9    2.46    4.01
   0 -10   9   -2.28    5.10
   0  10   9   -2.72    5.84
   0 -10 -10   17.71    4.54
   0 -10  10   22.42    6.53
   0  10  10   10.07    5.74
   0 -10 -11    1.88    4.09
   0 -10  11    6.17    5.99
   0 -10 -12   48.30    6.18
   0 -10  12   58.01    9.54
   0 -10 -13   11.81    4.89
   0  11   0   14.67    9.66
   0  11  -1   60.05   12.25
   0  11   1   51.50   12.23
   0 -11  -1   32.23    4.43
   0  11  -2   12.67    9.86
   0 -11  -2    9.23    3.86
   0  11   2   11.85    8.65
   0  11   3  184.18   15.73
   0 -11  -3  117.60    7.52
   0 -11  -4    1.32    4.30
   0  11   4   15.32    9.00
   0 -11  -5   35.71    5.68
   0  11   5   42.62   10.36
   0 -11  -6    1.49    3.70
   0  11   6   -1.18    6.86
   0 -11  -7   15.96    4.72
   0  11   7    6.09    6.31
   0 -11  -8    6.98    3.77
   0  11   8   11.65    6.46
   0 -11  -9   63.10    7.06
   0  11   9   53.43    7.44
   0  11  10    0.13    4.80
   0 -11 -10    9.67    5.19
   0  12   0  116.83   16.40
   0  12   1   21.58   10.98
   0  12  -1  -10.77   12.47
   0  12   2   36.82    9.61
   0  12  -2   17.09   12.50
   0 -12  -3   -0.71    3.77
   0  12   3   -6.20    9.97
   0 -12  -4   10.84    4.27
   0  12   4   27.07    8.57
   0  12   5   -1.27    7.64
   0 -12  -5   -3.04    4.23
   0  12   6   40.09    8.63
   0 -12  -6   37.87    5.63
   0  12   7    0.65    6.93
   0 -12  -7    7.93    4.60
   0  13   0   -6.69   11.90
   0  13  -1   44.41   15.60
   0  13   1   14.13   11.36
   0  13  -2    5.27   12.60
  -1   0  19   18.03   18.93
  -1   0  18  -14.25   13.78
  -1   0  17  302.04   28.27
  -1   0  16   12.41   11.30
  -1   0  15    5.49   11.08
  -1   0  14   -9.58    9.63
  -1   0  13  111.44   16.68
  -1   0  12    8.25    8.28
   1   0 -12    0.19    2.85
  -1   0  11 1382.98   37.91
   1   0 -11 1368.22   20.57
   1   0 -10   -1.96    2.81
  -1   0  10    1.32    2.68
  -1   0  10   -0.32    6.39
  -1   0  10    0.10    2.25
   1   0  -9   46.55    3.96
  -1   0   9   44.39    3.88
  -1   0   9   46.92    8.36
   1   0  -9   42.72    3.68
  -1   0   9   51.80    4.06
  -1   0   8   -0.04    2.15
   1   0  -8   -0.12    2.02
  -1   0   8    6.24    5.88
   1   0  -8   -0.51    2.15
  -1   0   8    1.82    3.16
  -1   0   7  154.04   10.47
   1   0  -7  126.33    5.59
   1   0  -7  142.17    5.41
  -1   0   7  156.22    5.85
  -1   0   7  137.36    6.77
  -1   0   6    0.90    3.07
   1   0  -6   -0.78    1.81
  -1   0   6    0.69    3.59
  -1   0   6   -0.30    1.80
  -1   0   5 3002.11   26.75
   1   0  -5 3056.86   20.16
   1   0  -5 3013.71   22.27
  -1   0   5 3010.14   32.91
  -1   0   4    0.15    3.10
  -1   0   4   -1.88    2.64
   1   0  -4    2.02    1.57
   1   0  -4   -0.47    1.45
   1   0  -3 1208.74   10.03
  -1   0   3 1211.36   13.98
   1   0  -3 1206.93   11.59
  -1   0   3 1240.67   15.86
  -1   0   2    0.51    1.47
   1   0  -2    0.38    1.27
   1   0  -2   -0.05    1.71
   1   0  -2   -0.12    0.85
   1   0  -2   -0.95    1.25
  -1   0   2    0.31    2.01
  -1   0   1  788.89    9.01
   1   0  -1  809.45    7.63
   1   0  -1  780.41    8.54
   1   0   0   -0.25    0.66
   1   0   1 4071.62   15.89
   1   0   2    1.23    1.34
   1   0   3   73.46    3.08
   1   0   3   82.65    3.67
   1   0   3   89.62    2.08
   1   0   4    1.80    1.09
   1   0   4   -0.22    2.14
   1   0   5   14.52    3.28
   1   0   5   13.48    1.64
   1   0   6    1.12    1.58
   1   0   6    0.32    3.26
   1   0   7 2823.72   23.71
   1   0   7 2606.30   36.01
   1   0   8   -1.72    5.24
   1   0   8   -2.54    2.12
   1   0   9   97.34   11.29
   1   0   9  127.73    6.58
   1   0  10    2.44    6.00
   1   0  11   21.59    8.59
   1   0  12   -0.18    9.15
   1   0  13  903.53   35.79
   1   0  14  -12.60    9.70
   1   0  15   79.76   17.32
   1   0  16   -1.25   12.84
   1   0  17   12.91   13.84
   1   0  18   32.52   18.81
   1   0  19   51.70   23.11
  -1  -1  19   13.45   12.02
  -1   1  19  -16.98   25.62
  -1  -1  18   20.70   13.25
  -1   1  18   22.47   19.34
  -1   1  17  -14.87   15.45
  -1  -1  17   15.02   11.49
  -1  -1  16   54.82   15.72
  -1   1  16   72.82   18.15
  -1  -1  15   -2.45    9.28
  -1   1  15   -3.84   13.90
  -1   1  14  543.03   33.91
  -1  -1  14  433.48   26.54
  -1  -1  13   10.58    8.41
  -1   1  13   16.84   11.83
   1  -1 -12   19.23    3.69
  -1  -1  12   26.44    8.72
  -1   1  12    8.93   10.59
  -1   1  11   28.12    3.18
   1   1 -11   32.46    4.32
  -1  -1  11   21.77    7.06
  -1   1  11   20.48    9.78
  -1   1  11   30.61    3.19
   1  -1 -11   29.53    3.76
  -1   1  10  257.13    9.03
   1  -1 -10  292.42    8.84
  -1   1  10  275.67   19.32
  -1  -1  10  269.07   14.71
  -1   1  10  311.32    8.64
   1   1 -10  307.72   10.02
   1  -1  -9   17.88    2.83
   1   1  -9   18.92    3.20
  -1   1   9   20.19    3.79
   1   1  -9   17.86    2.79
  -1  -1   9   22.04    2.87
  -1   1   9    5.15    6.46
  -1   1   9   17.94    3.13
  -1  -1   9   10.69    4.98
   1  -1  -9   20.31    2.87
  -1  -1   9   17.86    2.96
  -1  -1   8 2575.20   25.41
   1   1  -8 2781.47   26.03
   1  -1  -8 2601.62   23.72
  -1  -1   8 2799.40   24.64
   1   1  -8 2634.18   25.97
  -1   1   8 2450.57   28.34
  -1   1   8 2865.54   46.72
   1  -1  -8 2583.73   22.73
  -1   1   8 2567.94   23.59
  -1  -1   8 2478.14   34.29
  -1  -1   7    4.21    2.27
   1  -1  -7    3.78    2.02
  -1   1   7    3.83    3.16
   1  -1  -7    8.18    2.16
  -1  -1   7    1.54    2.86
  -1  -1   7    7.48    3.53
   1   1  -7    3.00    1.96
  -1   1   7    6.84    2.25
   1   1  -7    4.71    2.37
  -1   1   6   18.81    3.97
  -1  -1   6   31.12    3.22
   1  -1  -6   21.63    2.27
  -1   1   6   12.76    5.31
  -1  -1   6   29.56    3.66
   1   1  -6   29.60    3.01
   1  -1  -6   20.17    2.33
  -1  -1   6   24.07    3.98
   1   1  -6   24.47    3.08
  -1   1   5   67.59    5.33
  -1  -1   5   73.32    3.89
   1   1  -5   79.21    4.10
  -1   1   5   64.22    7.45
  -1  -1   5   78.08    5.09
   1  -1  -5   70.82    3.61
   1   1  -5   72.55    4.10
   1  -1  -5   77.11    3.31
  -1  -1   5   63.82    4.51
  -1   1   4  177.33    9.63
   1  -1  -4  162.47    4.05
  -1  -1   4  161.82    6.32
  -1  -1   4  156.56    6.07
  -1   1   4  160.38    6.74
   1   1  -4  159.13    5.94
   1  -1  -4  162.64    4.74
   1   1  -4  154.08    5.18
   1   1  -3   63.66    3.80
  -1   1   3   64.33    4.54
   1  -1  -3   66.66    2.42
  -1  -1   3   64.55    3.86
  -1  -1   3   62.34    3.50
   1   1  -3   77.33    3.53
   1  -1  -3   58.37    2.89
  -1   1   3   83.15    7.18
  -1  -1   2 6618.14   27.33
   1  -1  -2 6613.15   17.76
   1   1  -2 6624.03   31.30
   1  -1  -2 6595.91   23.04
  -1  -1   2 6620.93   25.29
  -1   1   2 6717.65   30.48
   1   1  -2 6637.23   25.60
   1  -1  -1    5.52    1.01
  -1  -1   1    2.15    0.91
  -1  -1   1    2.71    1.34
   1   1  -1    2.98    0.77
  -1   1   1    4.37    1.13
   1   1  -1    2.26    1.15
   1   1  -1    1.91    1.19
   1  -1  -1    6.33    5.68
   1  -1   0  399.30    3.84
  -1  -1   0  412.37    5.12
  -1  -1   0  393.84    3.53
   1   1   0  392.81    4.81
   1   1   1    4.70    0.95
  -1  -1  -1    5.63    1.05
   1  -1   1    5.67    1.15
   1  -1   2  201.63    4.65
   1  -1   2  206.51    2.26
   1   1   2  178.88    3.38
   1  -1   3   15.22    1.23
   1  -1   3   19.36    1.54
   1   1   3   10.81    6.09
   1  -1   3   14.11    1.91
   1   1   3   20.19    1.53
   1  -1   4 5000.16   21.67
   1  -1   4 4925.20   21.15
   1   1   4 5001.84   21.68
   1  -1   4 5107.95   29.39
   1  -1   5  145.22    4.53
   1  -1   5  127.80    5.49
   1   1   5  140.93   10.21
   1  -1   5  137.30    4.74
   1   1   5  134.46    4.17
   1  -1   6  298.84    8.22
   1   1   6  276.21    6.74
   1  -1   6  265.45    7.37
   1  -1   7   26.86    3.40
   1   1   7   32.47    3.17
   1  -1   7   36.05    4.05
   1   1   7   22.14    7.69
   1   1   8   13.77    8.28
   1  -1   8   11.66    4.08
   1   1   8   16.40    2.85
   1  -1   8   20.06    3.54
   1  -1   9   25.16    5.10
   1   1   9    9.25    8.21
   1   1   9   15.75    2.94
   1  -1   9   12.18    3.75
   1   1  10 1571.31   44.06
   1  -1  10 1365.30   29.26
   1  -1  11    0.04    5.77
   1   1  11   -2.42    9.11
   1   1  12  158.95   20.38
   1  -1  12  178.90   15.05
   1  -1  13   -6.53    8.32
   1   1  13    4.53   11.97
   1   1  14   17.20   14.10
   1  -1  14    8.79    9.09
   1   1  15   -8.91   16.51
   1  -1  15   -7.56   10.42
   1  -1  16  165.01   20.66
   1   1  16  120.78   30.69
   1   1  17   -1.60   19.76
   1  -1  17   -9.83   11.80
   1  -1  18   23.86   15.28
   1   1  18  -28.33   20.53
   1   1  19  -18.26   27.92
   1  -1  19    4.87   15.86
  -1  -2  20  -10.67   14.10
  -1  -2  19   55.08   17.04
  -1   2  18   15.78   24.67
  -1  -2  18   11.88   11.73
  -1  -2  17  210.30   21.44
  -1   2  17  141.48   35.54
  -1  -2  16   -0.08    9.80
  -1   2  16   14.58   20.64
  -1   2  15    1.51   19.64
  -1  -2  15   -0.87    7.87
  -1   2  14   -4.73   16.99
  -1  -2  14   -5.72    8.68
  -1  -2  13   56.67   10.12
   1  -2 -13   54.11    4.87
  -1   2  13   39.63   20.06
  -1   2  12   22.70   14.29
   1  -2 -12   18.80    3.58
  -1  -2  12   31.07    7.42
  -1   2  11 1083.52   17.73
  -1   2  11 1122.69   16.37
  -1  -2  11 1079.91   27.09
   1   2 -11 1025.18   19.75
   1  -2 -11 1021.12   16.70
  -1   2  10   29.87    4.63
   1   2 -10   18.46    3.91
  -1   2  10   21.02   11.82
   1  -2 -10   32.68    3.36
  -1   2  10   34.81    3.78
  -1  -2  10   29.73    5.85
   1  -2  -9  121.10    5.45
  -1  -2   9  104.03    8.17
   1  -2  -9  104.64    5.34
  -1   2   9  130.49    7.77
  -1   2   9  117.57    5.88
   1   2  -9  133.36    6.90
   1   2  -8    6.84    2.46
  -1   2   8   16.04    9.01
  -1  -2   8    7.42    2.56
  -1   2   8   10.25    3.14
   1  -2  -8   10.67    2.39
  -1  -2   8    7.68    2.90
  -1   2   8    5.75    2.45
   1   2  -8    7.27    2.85
   1  -2  -8    3.84    2.10
  -1  -2   8    7.89    3.62
  -1  -2   7  381.88   12.11
   1  -2  -7  354.07    7.82
  -1  -2   7  355.08    9.09
   1   2  -7  358.90   10.01
   1   2  -7  372.59   10.10
  -1   2   7  363.75   12.05
   1  -2  -7  362.08    8.50
  -1  -2   7  344.57    9.42
   1   2  -6   13.47    2.91
   1   2  -6   11.55    2.92
   1  -2  -6    9.65    1.78
  -1   2   6    6.11    3.65
  -1   2   6    4.48    7.86
  -1  -2   6    4.74    2.83
  -1  -2   6   12.10    3.35
  -1  -2   6    9.61    2.73
   1  -2  -6    7.65    2.04
   1  -2  -5 3979.18   25.12
  -1  -2   5 3963.15   30.52
  -1   2   5 4008.98   36.59
   1  -2  -5 3987.26   21.79
  -1  -2   5 3990.97   30.51
   1   2  -5 4039.83   29.96
  -1   2   5 4054.31   68.11
  -1  -2   5 3986.05   28.80
   1   2  -5 3934.90   31.17
   1   2  -4   42.71    3.68
  -1  -2   4   30.41    3.42
  -1  -2   4   40.59    3.43
  -1  -2   4   41.22    3.44
  -1   2   4   50.99    4.84
   1  -2  -4   53.69    3.02
   1   2  -4   46.64    3.88
   1  -2  -4   53.17    2.62
   1  -2  -3  200.31    4.15
   1  -2  -3  189.72    4.85
  -1   2   3  205.23    7.94
  -1  -2   3  217.43    6.22
   1   2  -3  204.26    6.46
  -1  -2   3  210.84    6.08
   1   2  -3  199.86    7.22
  -1   2   2    5.83    6.33
  -1   2   2    7.69    2.99
   1  -2  -2    9.15    2.27
   1  -2  -2    9.14    1.19
  -1  -2   2   11.23    1.84
   1   2  -2   11.75    2.42
  -1  -2   2   14.20    1.17
  -1  -2   2   14.08    2.11
   1  -2  -2    8.42    1.39
  -1   2   1   80.26    4.09
   1  -2  -1   77.41    2.11
  -1  -2   1   60.58    2.76
  -1  -2   1   59.03    2.98
   1  -2  -1   72.12    2.74
   1  -2  -1   69.28    2.87
   1   2  -1   65.33    3.76
   1  -2  -1   69.94    7.47
   1  -2   0    3.68    1.13
   1   2   0    4.62    1.02
   1   2   0    4.28    2.02
  -1  -2   0    3.27    1.40
  -1  -2   0    5.65    1.12
  -1  -2  -1 9494.17   24.49
   1  -2   1 9060.43   24.51
   1   2   1 9474.97   22.62
   1  -2   1 9869.42   32.23
  -1  -2  -1 9999.00   32.03
   1   2   1 9730.30   33.76
   1   2   1 9389.81   29.54
   1   2   2    9.15    1.48
   1  -2   2   10.70    1.23
   1  -2   2    8.49    1.89
   1   2   2    8.02    1.02
  -1  -2  -2    8.25    1.19
   1   2   2    8.16    1.62
  -1  -2  -2    9.08    1.58
  -1  -2  -3  496.61    6.14
   1   2   3  470.14    7.12
  -1  -2  -3  529.29    7.76
   1  -2   3  546.49    9.80
   1  -2   3  483.64    6.09
   1   2   3  577.23   23.21
   1  -2   3  493.45    8.52
   1  -2   4   44.09    3.13
  -1  -2  -4   48.00    2.26
   1   2   4   45.60    2.68
   1  -2   4   54.35    3.69
   1  -2   4   51.84    2.46
   1  -2   5  285.00    6.31
   1  -2   5  284.42    7.90
   1   2   5  253.14    6.22
  -1  -2  -5  255.13    5.21
   1  -2   5  288.68    7.99
  -1  -2  -6   25.62    2.19
   1   2   6   25.03    2.49
   1   2   6    8.28   13.29
   1  -2   6   16.81    2.44
   1  -2   6   14.09    2.92
   1  -2   6   15.35    2.88
   1   2   7 2097.18   21.32
   1  -2   7 2096.21   22.12
   1  -2   7 2213.14   25.73
  -1  -2  -7 2102.23   17.32
   1  -2   8   28.37    4.80
   1   2   8   48.40    4.11
  -1  -2  -8   46.48    3.09
   1   2   8   45.80   15.68
   1  -2   8   61.21    5.30
   1  -2   9  106.27    7.90
   1   2   9  150.86   21.53
   1  -2   9  135.49    7.73
   1   2  10  -13.97   13.46
   1  -2  10   -0.44    3.73
   1  -2  11   69.36    7.39
   1   2  11   70.49   20.19
   1  -2  12   12.99    6.14
   1   2  12    6.53   15.96
   1  -2  13  514.32   22.48
   1   2  13  657.04   48.32
   1  -2  14    7.06    7.03
   1   2  14  -18.25   18.77
   1  -2  15   32.36   11.34
   1   2  15  -11.81   20.54
   1  -2  16    2.34    9.05
   1   2  16   45.26   28.06
   1  -2  17    4.02   11.43
   1   2  17  -23.35   30.75
   1   2  18   60.19   34.00
   1  -2  18   19.49   12.78
   1  -2  19   81.78   19.52
   1   2  19   -3.21   32.54
  -1  -3  19    4.69   11.25
  -1  -3  18    5.13    9.78
  -1  -3  17    1.11    8.67
  -1   3  17  -49.06   34.91
  -1  -3  16   83.07   12.75
  -1   3  16   18.94   33.10
  -1  -3  15   -3.50    7.99
  -1   3  15   -4.97   23.46
  -1   3  14   27.82   48.45
  -1  -3  14  382.17   20.33
  -1  -3  13   -2.83    5.38
  -1   3  13   -1.66   20.39
   1  -3 -13    4.19    2.90
   1  -3 -12   22.56    3.64
  -1   3  12    9.95   20.06
  -1   3  12   19.68    3.79
  -1   3  12   20.42    3.53
  -1  -3  12   10.69    5.28
  -1  -3  11   -0.53    4.45
  -1   3  11   -2.71   17.58
   1  -3 -11    0.95    2.60
  -1   3  11    8.85    4.33
  -1   3  10  143.40    8.05
   1   3 -10  131.42    7.51
   1  -3 -10  133.29    6.05
  -1  -3  10  122.02    9.07
   1  -3  -9    6.84    2.61
   1   3  -9    2.11    3.17
  -1  -3   9   -0.03    4.20
  -1   3   9    3.41    3.90
  -1   3   9   -1.53   17.51
   1  -3  -9    1.76    2.00
  -1   3   8 2200.01   22.91
   1   3  -8 2185.65   27.20
  -1  -3   8 2163.13   18.87
   1   3  -8 2161.35   27.18
  -1  -3   8 2188.02   29.82
  -1   3   8 2043.23   29.52
   1  -3  -8 2162.39   22.85
  -1  -3   8 2223.81   19.39
   1  -3  -8 2150.46   20.28
   1  -3  -7   70.41    3.84
  -1   3   7   63.68    5.91
  -1  -3   7   41.30    4.33
   1  -3  -7   70.62    4.31
   1   3  -7   57.40    5.08
  -1  -3   7   53.52    4.26
   1   3  -7   57.02    5.12
  -1  -3   7   65.12    4.68
  -1  -3   6   55.57    4.51
   1  -3  -6   43.99    3.06
   1   3  -6   43.18    4.38
  -1   3   6   60.63   16.60
   1   3  -6   42.94    4.51
  -1  -3   6   54.83    4.91
   1  -3  -6   45.21    3.43
  -1   3   6   42.29    4.65
  -1  -3   6   54.26    4.42
   1   3  -5    1.11    2.49
  -1   3   5   -0.38    3.71
   1  -3  -5    2.53    1.79
  -1  -3   5    1.41    2.89
  -1  -3   5   -1.01    2.77
  -1  -3   5    1.31    2.35
   1  -3  -5    2.03    1.49
   1   3  -5    3.40    2.63
   1   3  -4  123.20    6.75
   1  -3  -4  141.04    4.26
  -1  -3   4  144.69    6.00
  -1  -3   4  135.35    6.29
   1  -3  -4  132.58    4.94
  -1   3   4  154.12   15.74
   1   3  -4  119.62    6.11
  -1  -3   4  151.61    6.21
  -1   3   4  132.85    7.86
  -1  -3   3   88.68    4.34
  -1  -3   3   91.11    4.53
   1  -3  -3   85.70    3.83
   1  -3  -3   86.73    3.27
   1   3  -3   82.73    5.29
  -1   3   3   85.02    6.17
  -1  -3   3   83.05    2.91
   1   3  -3   94.25    6.40
   1   3  -2 5099.33   35.16
  -1   3   2 5064.71   40.49
  -1  -3   2 5109.80   28.71
   1  -3  -2 4883.34   33.36
   1  -3  -2 5146.54   21.44
  -1  -3   2 5079.43   17.07
  -1  -3   2 5125.50   28.14
   1  -3  -2 5057.57   26.60
   1  -3  -1  257.89    6.73
  -1  -3   1  278.10    3.81
  -1  -3   1  311.44    6.96
   1  -3  -1  306.56    4.96
   1   3  -1  284.29    8.48
  -1   3   1  318.34    9.68
  -1  -3   1  296.99    6.35
   1  -3  -1  271.35    5.94
  -1  -3   0   42.52    3.01
  -1  -3   0   45.92    2.60
   1  -3   0   37.05    2.36
   1   3   0   38.13    3.80
  -1   3   0   33.00    3.87
  -1  -3  -1   -0.15    1.36
   1  -3   1    1.46    1.43
   1   3   1    2.17    2.86
   1  -3   1    1.39    1.27
  -1  -3  -1   -0.01    1.12
   1   3   1    1.44    1.10
  -1  -3  -2  209.45    5.71
   1   3   2  216.33    7.18
   1   3   2  208.94    4.40
   1  -3   2  208.13    4.90
  -1  -3  -2  188.16    4.67
   1  -3   2  215.06    5.84
   1   3   3  163.59    3.96
   1   3   3  168.97    6.01
  -1  -3  -3  154.07    4.22
   1  -3   3  154.35    5.53
   1  -3   3  153.33    4.38
  -1  -3  -3  170.87    5.25
  -1  -3  -4 3365.14   19.78
   1  -3   4 3353.19   25.31
   1  -3   4 3401.74   20.68
  -1  -3  -4 3428.55   23.43
   1   3   4 3361.75   17.29
   1  -3   5    3.02    1.63
  -1  -3  -5    1.77    1.83
   1  -3   5    1.72    1.75
   1   3   5    1.38    1.12
   1   3   5    3.17    1.48
   1   3   5    6.68   10.47
  -1  -3  -5    1.38    1.41
   1   3   5    1.96    1.59
   1  -3   6   31.04    3.65
   1   3   6   26.88    2.94
   1  -3   6   35.67    3.16
   1  -3   6   23.93    4.41
  -1  -3  -6   27.34    2.45
   1   3   7   -5.04   14.20
   1   3   7    0.33    1.92
   1  -3   7    0.41    2.65
   1  -3   7    1.97    2.09
  -1  -3  -7    0.96    1.57
   1  -3   7    3.21    3.67
  -1  -3  -8   36.37    3.11
   1  -3   8   30.53    5.54
   1  -3   8   34.65    3.83
   1   3   8   27.70   19.14
   1  -3   9   -2.58    3.14
   1   3   9    0.27   19.98
   1  -3  10 1062.64   21.86
   1   3  10 1065.97   78.35
   1   3  11    5.13   20.60
   1  -3  11   13.56    4.59
   1  -3  12  123.14    9.48
   1   3  12  141.21   36.61
   1  -3  13    1.76    5.03
   1   3  13   12.26   26.57
   1  -3  14   28.32    7.90
   1   3  14   34.65   29.13
   1   3  15  -43.42   30.49
   1  -3  15   -1.29    7.33
   1   3  16  188.94   48.45
   1  -3  16  192.34   17.81
   1   3  17   14.35   30.56
   1  -3  17   10.54    9.78
   1   3  18   57.36   38.99
   1  -3  18    8.58   10.66
   1   3  19   38.95   34.02
   1  -3  19    5.54   12.89
  -1  -4  19   53.29   14.98
  -1  -4  18   -2.06    9.37
  -1  -4  17  144.95   17.04
  -1  -4  16    6.94    7.57
  -1  -4  15   13.87    6.76
  -1   4  15   34.85   29.98
   1  -4 -14    3.42    3.52
  -1  -4  14   -3.95    6.13
  -1   4  14    0.90   28.35
   1  -4 -13   98.09    6.41
  -1  -4  13   92.71    9.55
  -1   4  13   99.63   34.56
   1  -4 -12    8.45    2.90
  -1  -4  12   11.03    5.35
  -1   4  12   10.21    4.18
  -1  -4  11  730.54   21.66
  -1   4  11  797.10   65.10
  -1   4  11  820.43   19.57
   1  -4 -11  775.23   14.79
  -1  -4  10   -1.65    4.20
   1  -4 -10    2.78    2.65
  -1   4  10    3.40    4.27
   1  -4  -9   21.71    3.03
   1   4  -9   29.70    4.61
  -1   4   9   18.15    3.94
  -1  -4   9   16.89    4.58
  -1  -4   8    4.04    3.35
   1  -4  -8    0.40    2.08
  -1   4   8    6.50    4.36
  -1   4   8    0.22   14.13
   1   4  -8   -3.61    3.54
   1  -4  -8   -1.81    2.46
  -1  -4   7  155.37    6.77
   1   4  -7  150.13    8.29
   1  -4  -7  157.20    6.59
   1  -4  -7  151.03    5.44
  -1   4   7  156.64    9.57
  -1  -4   7  151.74    6.41
  -1  -4   7  151.37    7.90
   1   4  -7  153.62    8.07
  -1   4   7  164.23   23.80
   1  -4  -6   76.74    3.92
  -1  -4   6   86.05    5.87
  -1   4   6   68.09    6.62
  -1  -4   6   95.42    5.57
  -1  -4   6   79.31    5.34
  -1   4   6  105.58   18.03
   1   4  -6   88.72    6.30
   1  -4  -6   79.18    4.87
   1   4  -6   79.10    6.12
  -1   4   5 2064.71   30.13
  -1  -4   5 2231.76   24.86
   1   4  -5 2271.39   29.26
  -1   4   5 2336.17   76.31
  -1  -4   5 2150.92   19.17
  -1  -4   5 2276.48   24.48
   1   4  -5 2179.67   27.39
   1  -4  -5 2221.75   18.57
   1  -4  -5 2253.65   21.99
  -1  -4   4    5.11    2.35
   1  -4  -4    2.05    1.49
   1   4  -4    2.58    3.12
  -1  -4   4    3.74    2.91
  -1  -4   4    1.94    1.46
   1  -4  -4    2.15    1.97
  -1   4   4    1.19    3.49
  -1  -4   4   -0.26    2.65
   1   4  -4    4.67    3.18
  -1   4   3  212.95    9.44
  -1  -4   3  269.55    8.04
   1  -4  -3  235.92    5.76
  -1  -4   3  242.10    5.07
   1   4  -3  253.74    9.68
  -1  -4   3  268.69    7.94
   1  -4  -3  234.09    6.71
   1  -4  -2    5.25    1.66
  -1   4   2    1.70    3.27
   1  -4  -2    6.45    3.05
   1  -4  -2    4.66    1.59
  -1  -4   2    1.87    2.02
   1   4  -2    3.08    3.32
   1  -4  -2    4.88    1.69
  -1  -4   2    2.32    1.10
  -1  -4   2    2.80    2.14
   1  -4  -1  386.30    6.77
   1  -4  -1  332.53    7.69
  -1   4   1  360.88   11.62
  -1  -4   1  341.81    7.78
   1  -4  -1  361.14    9.29
  -1  -4   1  368.60    8.80
   1   4  -1  375.17   11.32
  -1  -4   1  350.53    5.52
  -1   4   0   21.06    3.76
   1   4   0   34.22    4.56
   1  -4   0   28.07    1.98
  -1  -4   0   34.86    2.90
  -1  -4   0   34.06    2.75
   1  -4   0   25.80    2.70
  -1  -4   0   34.09    3.15
   1  -4   0   24.70    2.36
   1  -4   1 3205.24   23.60
   1   4   1 3213.85   31.21
  -1  -4  -1 3122.26   21.35
   1  -4   1 3207.38   22.47
  -1  -4  -1 3160.48   24.30
  -1  -4  -2   98.48    4.73
   1  -4   2  108.10    4.45
   1   4   2   92.52    5.92
  -1  -4  -2   96.15    3.99
   1  -4   2  107.97    4.75
  -1   4  -2  107.49    6.20
   1  -4   3   94.69    4.16
   1   4   3  112.20    6.36
  -1  -4  -3  100.75    4.24
   1   4   3  101.84    3.86
  -1  -4  -3   97.94    4.73
   1  -4   3  126.90    5.98
   1  -4   4    1.88    1.67
  -1  -4  -4    0.81    2.02
   1   4   4   -0.88    3.01
  -1  -4  -4    4.17    1.73
   1   4   4    5.55    1.62
   1  -4   4    5.01    2.11
   1   4   5   22.27    2.20
   1   4   5   19.55    3.45
   1  -4   5   27.87    3.26
  -1  -4  -5   20.62    2.64
   1  -4   5   22.57    2.68
  -1  -4  -5   18.92    2.28
   1   4   6   10.77    2.61
  -1  -4  -6   10.60    2.52
  -1  -4  -6   14.15    2.39
   1  -4   6    9.62    2.37
   1  -4   6    7.81    2.29
   1   4   6   13.52    2.03
  -1  -4  -7 1627.29   17.77
   1  -4   7 1585.96   19.96
   1  -4   8    8.19    2.85
  -1  -4  -8   14.59    2.60
   1   4   8    6.08   16.38
   1  -4   8   11.67    3.53
   1  -4   9  114.55    6.87
   1   4   9   99.94   27.71
   1   4  10  -10.98   18.12
   1  -4  10    0.40    3.30
   1  -4  11   25.10    5.07
   1  -4  12   13.88    5.12
   1  -4  13  428.02   17.48
   1   4  13  351.28   55.99
   1  -4  14    1.97    5.25
   1   4  14   11.93   26.03
   1  -4  15   65.14   10.18
   1  -4  16    5.41    7.67
   1   4  17  -34.53   35.77
   1  -4  17    5.11    8.73
   1   4  18   65.33   33.62
   1  -4  18    0.87    9.77
   1   4  19   78.20   36.06
  -1  -5  18    3.12    9.98
  -1  -5  17  -13.15    9.72
  -1  -5  16   36.23    8.95
   1  -5 -15    3.91    3.54
  -1  -5  15    2.52    6.27
   1  -5 -14  193.03    8.92
  -1  -5  14  193.24   13.91
  -1  -5  13    3.55    4.86
  -1   5  13   15.51   20.70
   1  -5 -13   10.58    3.63
  -1   5  13    0.01    3.72
   1  -5 -12   17.94    3.48
  -1  -5  12   16.88    6.10
  -1   5  12   14.82    4.91
  -1   5  12   13.80   23.63
   1  -5 -11    7.78    2.57
  -1  -5  11    4.34    5.63
  -1   5  11    3.49    5.00
   1  -5 -10  175.06    7.11
  -1   5  10  169.78   10.38
  -1   5  10  190.70   33.53
  -1  -5  10  162.32   10.06
   1   5  -9   16.48    4.84
  -1  -5   9   17.36    4.50
  -1   5   9   20.29    5.68
   1  -5  -9   16.09    3.00
  -1  -5   8 1021.68   21.12
   1   5  -8 1046.78   22.65
   1  -5  -8 1066.52   15.60
  -1  -5   7   49.86    4.42
  -1  -5   7   41.84    4.02
  -1   5   7   54.61    6.20
   1  -5  -7   51.37    4.40
  -1  -5   7   43.26    4.96
   1   5  -7   52.12    6.03
   1  -5  -7   57.72    4.10
   1  -5  -6   59.89    4.42
  -1  -5   6   64.75    5.08
  -1   5   6   58.49    7.00
  -1  -5   6   74.04    5.60
   1   5  -6   59.02    5.95
   1  -5  -6   56.12    3.82
  -1  -5   6   64.34    5.18
  -1  -5   5   -0.54    1.84
   1   5  -5    3.85    3.58
  -1  -5   5    0.26    2.63
  -1  -5   5    0.70    3.00
   1   5  -5    0.14    3.66
   1  -5  -5    1.99    2.29
  -1  -5   5    2.78    3.30
  -1   5   5    4.94    4.91
   1  -5  -5    1.43    1.84
   1   5  -4  102.78    8.03
  -1  -5   4   93.29    5.64
  -1  -5   4   99.26    6.87
  -1  -5   4   94.69    3.82
   1  -5  -4  115.38    5.60
   1   5  -4   98.87    7.13
  -1  -5   4  114.77    6.51
  -1   5   4  124.53    9.30
   1  -5  -4  112.49    4.77
  -1  -5   3   72.56    5.21
   1  -5  -3   49.65    5.24
  -1  -5   3   58.89    4.53
   1   5  -3   57.14    6.02
  -1  -5   3   54.92    5.64
   1  -5  -3   49.30    3.26
  -1  -5   3   59.23    2.98
   1  -5  -3   61.31    4.39
  -1   5   3   61.57    7.10
  -1  -5   2 1683.71   14.38
   1  -5  -2 1735.39   20.07
   1   5  -2 1654.57   26.68
  -1  -5   2 1752.72   20.96
   1  -5  -2 1699.20   23.99
   1  -5  -2 1772.99   17.02
  -1  -5   2 1700.74   20.13
  -1  -5   1   51.61    4.14
   1  -5  -1   65.92    3.60
  -1   5   1   75.96    7.55
  -1  -5   1   54.35    3.97
   1  -5  -1   54.82    4.63
  -1  -5   1   50.81    2.69
   1  -5  -1   60.89    4.18
   1   5  -1   71.43    6.51
  -1  -5   0  361.32    9.42
  -1   5   0  385.02   14.35
  -1  -5   0  364.65    8.99
   1   5   0  336.04   12.01
   1  -5   0  349.65    6.63
   1  -5   0  320.41    8.35
   1  -5   0  310.21    7.42
  -1  -5  -1    2.68    2.07
  -1  -5  -1    2.46    1.90
   1   5   1    3.68    3.58
  -1   5  -1    7.76    4.41
   1  -5   1    3.56    2.06
   1  -5   1    3.46    1.98
  -1  -5  -2  208.50    6.60
  -1  -5  -2  214.80    7.46
   1  -5   2  213.57    6.83
   1  -5   2  219.12    7.09
   1   5   2  199.14    9.47
  -1   5  -3   75.96    5.99
   1  -5   3   82.55    4.71
  -1  -5  -3   99.28    5.35
  -1  -5  -3   86.05    4.36
   1  -5   3   80.14    5.08
   1   5   3   85.18    6.44
   1   5   3   89.49    4.13
  -1   5  -4 1943.44   28.60
  -1  -5  -4 1875.69   18.97
   1  -5   4 1926.10   22.15
   1  -5   4 1833.76   19.91
   1   5   4 1868.67   26.02
  -1  -5  -4 1950.01   21.82
   1   5   4 1869.43   17.44
   1   5   5   61.09    5.52
  -1  -5  -5   55.13    4.33
   1  -5   5   59.38    4.18
   1   5   5   64.37    3.69
   1  -5   5   58.27    4.65
  -1  -5  -5   59.25    3.90
   1  -5   6  201.78    7.45
   1   5   6  221.47    8.45
  -1  -5  -6  198.99    6.69
   1   5   6  219.13    6.36
   1   5   7   13.66    2.25
   1  -5   7   10.41    3.14
   1  -5   7   19.76    3.58
   1   5   7   17.95    3.34
  -1  -5  -7   13.97    2.66
  -1  -5  -8   32.79    3.45
   1  -5   8   36.67    4.85
   1  -5   8   28.60    4.11
  -1  -5  -9   36.50    3.82
   1  -5   9   29.37    4.68
   1  -5   9   36.25    4.67
   1  -5  10  670.56   17.15
   1   5  10   35.97   29.46
   1   5  11  -22.05   25.25
   1  -5  11    7.64    4.17
   1   5  12   46.46   32.16
   1  -5  12   80.69    8.08
   1   5  13   -5.09   24.92
   1  -5  13   -3.05    4.82
   1  -5  14   11.68    5.84
   1   5  14    9.97   24.69
   1   5  15   64.39   33.75
   1  -5  15    5.33    6.56
   1   5  16    6.02   38.31
   1  -5  16   98.55   12.08
   1   5  17   21.30   30.77
   1  -5  17    0.58    8.72
   1   5  18  -64.02   47.80
   1  -5  18   24.47   10.98
  -1  -6  18   -1.55    9.50
   1  -6 -17   78.43    6.85
  -1  -6  17   65.00   11.41
  -1  -6  16   13.65    8.04
   1  -6 -16   11.27    4.32
  -1  -6  15    7.25    6.39
   1  -6 -15   13.96    3.84
  -1  -6  14    5.62    6.16
   1  -6 -14    3.76    3.72
  -1  -6  13   54.09    8.09
  -1   6  13   61.83    6.27
   1  -6 -13   61.76    5.64
   1  -6 -12   16.82    3.72
  -1  -6  12    4.62    5.53
  -1   6  12   16.62    5.38
  -1  -6  11  311.39   14.58
  -1   6  11  317.05   13.84
   1  -6 -11  344.98   10.59
  -1   6  10   49.16    7.48
   1  -6 -10   39.67    4.21
  -1  -6  10   41.63    6.09
  -1   6   9   69.49    8.05
   1  -6  -9   51.71    4.49
  -1  -6   9   57.93    6.33
   1   6  -8    2.34    4.41
   1  -6  -8    0.94    2.49
  -1   6   8    6.61    5.18
  -1  -6   8   -0.16    3.65
   1   6  -7  246.83   12.01
   1  -6  -7  238.30    7.75
  -1  -6   7  224.68   10.36
  -1   6   7  232.00   13.10
  -1  -6   6   33.30    4.48
   1   6  -6   28.96    5.52
  -1  -6   6   20.13    3.00
  -1  -6   6   31.50    4.45
  -1   6   6   20.64    5.81
   1  -6  -6   19.66    3.62
  -1  -6   6   20.21    3.89
   1  -6  -6   18.03    2.88
   1  -6  -5 1078.75   18.07
   1  -6  -5 1068.50   15.28
  -1  -6   5  970.59   18.61
  -1  -6   5 1038.13   20.28
   1   6  -5 1061.76   24.05
  -1   6   5  901.17   22.12
  -1  -6   5 1091.50   18.72
  -1  -6   5 1000.23   14.19
   1  -6  -4   73.80    5.32
  -1  -6   4   57.67    5.41
  -1   6   4   52.28    6.67
   1   6  -4   48.21    6.39
   1  -6  -4   64.78    4.09
  -1  -6   4   56.54    3.51
  -1  -6   4   55.11    5.04
   1  -6  -3   18.59    3.25
  -1  -6   3    7.69    2.84
  -1   6   3   11.71    5.01
   1  -6  -3   14.97    3.45
  -1  -6   3    6.15    1.80
   1   6  -3   12.53    4.89
   1  -6  -3    4.74    2.77
  -1  -6   3    7.49    3.26
   1  -6  -2    0.38    3.83
   1  -6  -2    2.07    2.55
  -1  -6   2    2.12    2.94
   1  -6  -2    2.21    2.23
  -1   6   2    6.23    5.35
  -1  -6   2    2.93    1.71
   1   6  -2    3.61    4.67
  -1  -6   2    3.47    2.64
   1   6  -1   67.20    7.28
  -1  -6   1   61.33    4.86
   1  -6  -1   66.89    4.74
  -1  -6   1   61.34    4.81
   1  -6  -1   73.77    4.14
  -1   6   1   70.92    7.39
   1  -6  -1   77.01    5.83
  -1  -6   1   64.33    3.44
   1   6   0   56.48    6.74
   1  -6   0   42.98    3.67
  -1  -6   0   44.43    4.25
  -1  -6   0   44.06    3.86
   1  -6   0   35.74    3.56
   1  -6   0   44.75    3.11
  -1   6   0   35.41    5.52
   1  -6   0   44.59    4.23
   1   6   1 1922.07   30.43
  -1  -6  -1 1863.05   26.76
  -1  -6  -1 1947.08   24.20
   1  -6   1 1888.70   22.57
   1  -6   1 1952.62   22.58
  -1   6  -1 1981.83   33.70
   1  -6   2   21.35    3.09
   1  -6   2   19.32    3.01
   1   6   2   28.14    5.28
  -1   6  -2   22.66    5.78
  -1  -6  -2   18.62    3.12
  -1  -6  -2   15.03    2.81
   1  -6   3  254.00    8.70
  -1   6  -3  282.99   13.59
   1  -6   3  243.13    8.37
   1   6   3  251.70   11.52
  -1  -6  -3  273.83    8.28
  -1  -6  -3  272.20    9.43
   1  -6   4   12.87    3.03
   1  -6   4   13.93    3.19
  -1  -6  -4    4.83    2.40
   1   6   4    9.92    4.30
   1  -6   5   35.48    4.13
  -1  -6  -5   33.57    3.72
   1  -6   5   42.59    4.28
   1   6   5   32.97    5.43
  -1  -6  -6   52.39    4.21
   1   6   6   55.21    5.64
   1  -6   6   41.96    4.14
   1   6   7  661.20   14.58
   1  -6   7  621.77   14.80
  -1  -6  -7  637.30   13.27
   1  -6   7  582.39   14.06
   1   6   8   63.56    3.64
   1   6   8   68.51    4.33
   1  -6   8   61.60    5.69
   1  -6   8   71.81    6.05
  -1  -6  -8   57.89    4.64
   1  -6   9  126.98    7.81
  -1  -6  -9  130.70    6.56
   1  -6   9  119.84    7.73
   1  -6  10   -1.14    3.95
   1  -6  11   28.23    5.19
   1  -6  12   20.50    5.74
   1  -6  13  166.44   11.86
   1  -6  14    6.58    6.35
   1  -6  15   28.30    7.58
   1  -6  16    5.72    6.82
   1  -6  17    7.05    7.88
   1  -7 -17   -6.03    4.72
  -1  -7  16   46.95   10.14
   1  -7 -16   42.36    5.93
   1  -7 -15   12.38    4.01
  -1  -7  15   -0.76    6.82
   1  -7 -14  130.91    7.93
  -1  -7  14  142.39   12.49
  -1  -7  13    5.73    5.31
  -1   7  13   14.65    4.85
   1  -7 -13   15.44    4.05
  -1  -7  12    9.42    5.36
   1  -7 -12   11.17    3.52
  -1   7  12   12.73    4.94
  -1   7  11    0.09    5.49
  -1  -7  11    4.67    5.11
   1  -7 -11    2.58    3.28
   1  -7 -10   51.73    4.82
  -1   7  10   47.05    7.60
  -1  -7  10   54.08    7.35
   1  -7  -9   29.01    3.76
  -1  -7   9   16.09    4.81
  -1   7   9   21.32    6.90
  -1  -7   8  422.20   15.40
   1  -7  -8  457.19   11.34
  -1  -7   7   28.85    5.06
  -1   7   7   35.78    6.56
   1  -7  -7   42.05    4.16
  -1   7   6   75.90    8.92
  -1  -7   6   75.40    4.72
   1  -7  -6   76.19    5.13
  -1  -7   6   91.61    5.42
  -1  -7   6   72.31    5.21
  -1  -7   6   69.29    6.50
   1  -7  -5    4.68    3.18
  -1  -7   5    4.14    2.08
   1   7  -5    5.19    4.98
  -1   7   5    1.14    5.85
  -1  -7   5    7.56    3.60
  -1  -7   5    4.51    3.15
   1  -7  -5    6.20    2.63
   1   7  -4  106.51    9.28
  -1  -7   4  109.71    5.04
   1  -7  -4  123.97    7.03
   1  -7  -4  143.23    6.93
  -1  -7   4  102.36    6.92
  -1  -7   4  116.97    7.67
  -1   7   4  147.37   12.12
   1  -7  -3   66.10    4.46
  -1   7   3   63.72    8.89
   1  -7  -3   74.91    5.63
  -1  -7   3   72.14    4.05
   1   7  -3   75.83    8.22
  -1  -7   3   70.64    6.13
  -1  -7   3   76.02    5.97
   1  -7  -2  913.37   17.56
   1  -7  -2  991.69   15.10
  -1  -7   2  946.89   18.61
  -1  -7   2  973.59   18.51
   1   7  -2  990.52   25.08
  -1  -7   2  941.17   13.45
  -1  -7   1   93.75    4.55
   1   7  -1   94.94    8.96
   1  -7  -1  103.78    6.46
  -1  -7   1   94.52    6.42
  -1   7   1   97.70   10.06
  -1  -7   1   88.31    6.04
   1  -7  -1  107.33    5.19
   1  -7  -1   96.80    6.42
   1  -7   0   80.53    4.20
   1  -7   0   95.04    4.03
  -1  -7   0   91.67    4.66
  -1   7   0   98.85   10.18
  -1  -7   0   95.98    6.26
   1  -7   0   99.06    6.32
   1   7   0   84.07    8.31
   1  -7   0   96.04    6.07
  -1  -7   0   97.09    5.98
   1  -7   1    0.86    2.63
   1  -7   1   -1.26    2.53
   1   7   1   -0.46    4.49
  -1   7  -1   -0.45    5.56
  -1  -7  -1    1.27    2.63
  -1  -7  -1   -0.36    2.81
   1  -7   2  162.41    7.51
   1  -7   2  176.35    8.04
  -1  -7  -2  155.49    8.03
   1   7   2  161.28   10.60
  -1  -7  -2  153.53    7.89
   1   7   3   56.85    6.95
  -1  -7  -3   50.11    4.40
   1  -7   3   46.88    4.96
   1  -7   3   47.80    4.61
   1   7   4  667.35   18.99
   1  -7   4  752.82   16.26
   1  -7   4  790.28   17.03
  -1  -7  -4  665.07   13.97
   1  -7   5   58.81    5.33
  -1  -7  -5   41.57    4.23
   1   7   5   50.17    6.41
   1  -7   5   45.92    4.76
   1   7   6   36.85    5.60
  -1  -7  -6   37.39    4.07
   1  -7   6   30.76    4.35
   1  -7   6   48.08    5.30
   1  -7   7    1.89    3.13
  -1  -7  -7    4.05    2.62
   1   7   7    1.33    3.95
   1  -7   7   -0.49    3.40
  -1  -7  -8   33.24    4.34
   1  -7   8   38.56    5.17
   1   7   8   40.75    4.71
   1  -7   8   42.83    5.70
   1  -7   9   11.57    4.46
  -1  -7  -9   13.63    3.38
   1  -7   9   17.02    4.55
  -1  -7 -10  316.21   10.96
   1  -7  10  269.41   12.18
   1  -7  11   16.58    5.42
   1  -7  12   48.96    6.94
   1  -7  13    0.04    5.27
   1  -7  14    6.68    5.89
   1  -7  15   -0.68    6.19
   1  -7  16   46.81    9.27
   1  -8 -16    9.43    4.99
   1  -8 -15   14.99    4.49
  -1  -8  14   11.11    6.62
   1  -8 -14    2.55    3.73
  -1   8  13   31.59    5.57
   1  -8 -13   44.98    5.11
  -1  -8  13   42.40    8.64
  -1  -8  12    8.00    5.84
  -1   8  12    2.80    6.14
   1  -8 -12    7.16    3.46
   1  -8 -11  172.74    8.22
  -1  -8  11  163.30   11.83
  -1   8  11  178.52   11.77
  -1   8  10    6.82    5.54
  -1  -8  10   14.79    5.07
   1  -8 -10   11.87    3.74
   1  -8  -9   16.00    3.69
  -1  -8   9   27.21    5.72
  -1   8   9   16.90    6.71
  -1  -8   8    1.98    4.22
   1  -8  -8    0.49    3.27
  -1   8   8   10.39    6.63
  -1   8   7   83.52   10.05
   1  -8  -7   83.06    5.70
  -1  -8   7   77.49    7.54
   1   8  -6   29.99    7.29
   1  -8  -6   24.88    3.82
  -1  -8   6   37.79    6.27
  -1   8   6   38.08    8.47
   1  -8  -6   26.42    3.89
   1   8  -5  497.40   20.16
  -1  -8   5  471.60   15.23
   1  -8  -5  491.36   12.64
  -1  -8   5  511.50   12.68
  -1   8   4   74.69   10.43
   1   8  -4   48.23    7.81
   1  -8  -4   55.16    5.70
  -1  -8   4   57.67    6.05
   1  -8  -4   60.86    4.64
  -1  -8   4   37.73    5.05
  -1   8   3   35.11    7.83
   1   8  -3   57.82    8.74
  -1  -8   3   50.86    5.57
   1  -8  -3   56.00    4.74
  -1  -8   3   55.73    5.92
   1  -8  -3   52.06    5.60
   1  -8  -2    7.14    3.78
  -1  -8   2    0.99    3.75
   1   8  -2    8.88    5.37
   1  -8  -2    6.10    3.02
  -1   8   2    2.58    8.29
  -1  -8   2   -0.29    3.51
   1  -8  -1  112.10    5.33
   1  -8  -1  114.63    6.38
   1  -8  -1  104.10    6.95
  -1  -8   1  101.12    7.04
  -1   8   1  141.41   13.79
   1  -8  -1  120.47    7.45
  -1  -8   1  113.92    7.64
   1   8  -1  104.22   10.08
  -1  -8   0   58.63    4.10
  -1  -8   0   59.01    5.59
  -1   8   0   72.13   10.79
   1  -8   0   57.75    5.31
   1  -8   0   61.84    5.68
   1   8   0   60.33    7.93
   1   8   1  721.56   22.70
   1  -8   1  740.14   17.26
   1  -8   1  748.08   16.54
  -1  -8  -1  700.76   16.10
   1   8   2   99.44    9.77
   1  -8   2  120.71    7.74
   1  -8   2  112.44    6.88
   1  -8   3   68.98    6.14
   1  -8   3   89.29    7.35
   1   8   3   77.93    8.31
  -1  -8  -3   76.99    6.42
   1  -8   4    2.11    3.46
  -1  -8  -4    9.13    3.40
   1  -8   4    1.48    3.10
   1   8   4    2.18    4.68
  -1  -8  -4    3.62    2.84
   1  -8   5   47.96    5.37
   1   8   5   41.54    6.67
  -1  -8  -5   34.70    4.41
   1  -8   5   44.59    5.41
   1   8   6   31.31    6.17
   1  -8   6   28.97    4.69
  -1  -8  -6   34.74    4.37
   1  -8   6   19.23    3.95
   1   8   7  334.28   12.65
   1  -8   7  317.29   11.37
   1  -8   7  337.83   12.81
  -1  -8  -7  361.26   11.52
   1  -8   8    4.14    4.29
  -1  -8  -8    6.08    3.19
   1   8   8    2.72    4.35
   1  -8   8    6.24    4.03
  -1  -8  -9   57.34    5.40
   1  -8   9   73.46    7.11
   1  -8   9   57.82    6.74
   1  -8  10   -0.92    4.15
  -1  -8 -10    0.77    3.28
  -1  -8 -11   18.50    4.42
   1  -8  11   26.97    6.07
   1  -8  12    2.54    5.11
   1  -8  13  103.29   10.79
   1  -8  14   14.30    7.47
   1  -8  15   12.94    7.27
   1  -9 -14   44.87    5.73
   1  -9 -13    7.87    4.30
  -1   9  13   -1.83    3.97
  -1   9  12    5.73    5.93
   1  -9 -12    7.94    3.72
   1  -9 -11    1.99    3.51
  -1   9  11   -5.42    6.56
  -1  -9  10   43.19    7.55
   1  -9 -10   56.73    5.62
  -1   9  10   56.39    8.40
  -1   9   9    5.61    6.03
  -1  -9   9    8.73    5.78
   1  -9  -9    6.08    3.03
   1  -9  -8  205.43    9.25
  -1   9   8  225.78   14.83
  -1  -9   8  199.56   12.50
   1  -9  -8  193.71    8.65
  -1   9   7   17.79    7.85
   1  -9  -7   10.95    4.87
   1  -9  -7   23.47    4.24
  -1  -9   7   17.99    5.78
  -1  -9   6   30.29    5.85
   1   9  -6   37.69    8.54
  -1   9   6   35.87    9.13
   1  -9  -6   28.92    4.37
   1   9  -5    0.69    6.71
   1  -9  -5    0.19    2.94
  -1   9   5    1.72    6.98
   1   9  -4   47.50    8.76
  -1  -9   4   46.98    5.12
   1  -9  -4   49.24    5.07
  -1  -9   3   24.51    5.02
  -1   9   3   18.81    8.24
   1   9  -3   39.02    8.81
   1  -9  -3   25.42    3.94
  -1   9   2  361.36   21.07
   1  -9  -2  289.54    8.70
   1   9  -2  341.07   17.84
   1  -9  -2  301.28   12.55
  -1  -9   2  333.71   12.50
  -1  -9   1   15.46    4.21
  -1   9   1   34.82   10.54
   1   9  -1   17.96    7.41
   1  -9  -1   24.66    4.21
   1  -9  -1   26.62    4.49
   1   9   0   87.06    9.92
   1  -9   0   82.12    7.04
   1  -9   0   74.12    6.41
  -1  -9   0   72.01    6.66
   1  -9   1   -4.39    3.79
   1  -9   1   -1.45    3.69
  -1  -9  -1    0.32    3.56
   1   9   1   -9.94    6.06
   1   9   2   67.36    8.28
   1  -9   2   73.29    6.53
   1  -9   2   79.07    7.02
  -1  -9  -2   71.88    6.39
  -1  -9  -3   23.94    4.23
   1   9   3   18.02    5.98
   1  -9   3   24.67    4.79
   1  -9   3   27.64    4.88
   1  -9   4  324.45   13.11
   1  -9   4  313.71   11.74
   1   9   4  310.03   14.97
  -1  -9  -4  306.22   11.95
  -1  -9  -5   18.42    4.50
   1   9   5   16.06    5.13
  -1  -9  -5   27.84    4.88
   1  -9   5   33.44    5.05
   1  -9   5   12.35    4.50
   1   9   6   51.38    6.97
   1  -9   6   48.34    6.19
   1  -9   6   51.41    5.95
  -1  -9  -6   57.14    5.76
   1  -9   7   -8.24    4.16
   1   9   7   -2.87    4.75
   1  -9   7    0.89    3.93
  -1  -9  -7    1.45    3.16
   1  -9   8   22.34    5.85
  -1  -9  -8   29.93    4.75
   1   9   8   34.24    5.41
   1  -9   9   10.04    5.00
  -1  -9  -9   10.36    4.15
   1  -9  10  131.65   10.44
  -1  -9 -10  134.78    8.40
   1  -9  11    4.77    5.37
  -1  -9 -11    1.14    3.99
   1  -9  12   15.07    6.52
  -1  -9 -12   26.78    5.24
   1  -9  13    8.93    6.37
   1  -9  14    1.93    7.32
  -1  10  12    1.45    5.26
   1 -10 -12    5.95    4.34
   1 -10 -11   56.61    6.42
   1 -10 -11   50.44    6.28
  -1  10  11   70.92    9.03
   1 -10 -10    9.58    4.29
  -1  10  10   11.39    7.12
   1 -10 -10    8.37    3.96
  -1  10   9   24.22    8.11
   1 -10  -9   24.32    5.22
   1 -10  -8   -1.37    3.64
  -1  10   8  -10.86    8.50
   1 -10  -7   41.28    5.07
  -1  10   7   70.04   10.54
  -1  10   6    1.77    7.95
   1  10  -6    7.17    8.24
   1 -10  -6    8.65    4.11
  -1  10   5  184.50   15.88
   1  10  -5  195.48   16.04
   1 -10  -5  165.34    8.08
   1 -10  -4   21.55    4.25
  -1  10   4   28.20    9.10
   1  10  -4   21.26    8.64
  -1 -10   3   25.26    4.65
  -1  10   3   23.94   10.29
   1  10  -3   38.05    8.96
   1 -10  -3   29.93    4.22
  -1 -10   2   -7.45    5.22
  -1  10   2   -4.20    9.24
   1  10  -2    2.53    6.97
   1 -10  -2   -0.52    3.88
   1 -10  -1   43.42    5.86
   1  10  -1   54.27    9.59
  -1 -10   1   46.30    6.16
  -1  10   1   56.15   11.84
  -1 -10   0   15.26    4.83
   1 -10   0   14.62    4.64
   1  10   0   19.59    7.12
   1  10   1  246.52   15.59
   1 -10   1  240.66   11.99
  -1 -10  -1  204.63   10.28
   1 -10   1  245.97   11.26
   1 -10   2   16.86    4.93
   1  10   2   12.14    6.45
  -1 -10  -2    7.46    4.58
  -1 -10  -3   55.83    6.15
   1 -10   3   59.66    6.97
   1  10   3   48.71    7.52
  -1 -10  -4    1.42    3.97
   1  10   4   -4.61    5.80
   1 -10   4   -2.84    4.54
  -1 -10  -5   19.93    4.64
   1  10   5   21.96    6.06
   1 -10   5   22.35    5.11
   1 -10   6   14.99    5.17
  -1 -10  -6    8.72    4.57
   1  10   6   13.91    6.17
  -1 -10  -7  113.42    8.70
  -1 -10  -7   90.85    7.63
   1 -10   7  118.48    9.94
   1  10   7  105.45    8.67
  -1 -10  -8    8.41    3.72
   1  10   8   10.83    4.64
  -1 -10  -8   14.38    4.59
   1 -10   8    5.23    5.40
  -1 -10  -9   40.39    5.76
   1 -10   9   47.18    7.91
   1 -10  10    9.99    5.87
  -1 -10 -10    6.62    4.45
  -1 -10 -11   14.81    4.96
   1 -10  11    3.62    5.67
   1 -10  12   -3.07    6.13
  -1 -10 -12   11.04    4.62
  -1 -10 -13   41.41    6.11
   1 -11 -10   17.64    4.75
  -1  11  10   24.27    8.49
   1 -11  -9   13.35    4.68
  -1  11   9    8.60    7.82
  -1  11   8   61.57   10.95
   1 -11  -8   55.84    6.14
   1 -11  -7    8.09    3.77
  -1  11   7    7.56    8.46
   1 -11  -6   23.54    4.41
  -1  11   6   28.91   10.84
   1  11  -6   17.69    9.49
   1 -11  -5   -2.00    3.44
  -1  11   5   -1.20    9.65
   1  11  -5   12.80    9.68
   1  11  -4   40.76   10.43
   1 -11  -4   16.81    2.23
  -1  11   3    2.37    9.07
   1  11  -3   12.79    8.12
   1  11  -2  120.44   13.35
  -1 -11   2   82.58    5.49
  -1 -11   1    3.13    4.61
  -1  11   1   28.65   11.59
   1  11  -1   16.37    9.00
  -1 -11   0   41.12    6.35
   1  11   0   24.67    8.15
  -1 -11  -1   -1.83    4.49
   1  11   1  -10.37    7.02
   1  11   2   48.47    9.68
  -1 -11  -2   32.24    5.90
  -1 -11  -3    8.00    4.93
   1  11   3   -3.76    6.96
   1  11   4   86.32   10.06
  -1 -11  -4   92.33    7.71
   1  11   5    5.38    6.47
  -1 -11  -5   11.91    4.44
   1 -11   5    7.81    5.19
   1 -11   6   27.64    6.66
  -1 -11  -6   24.22    4.92
   1  11   6   25.46    5.72
   1  11   7   -0.27    5.18
   1 -11   7   -0.28    5.32
  -1 -11  -7   -0.88    4.08
  -1 -11  -8   17.50    5.33
   1 -11   8   18.58    7.08
   1  11   8    6.18    3.67
   1 -11   9    0.85    7.18
  -1 -11  -9    1.13    4.84
  -1 -11  -9   17.19    6.34
  -1 -11 -10   47.59    6.19
  -1 -11 -10   25.15    6.11
   1 -11  10   31.04    7.10
   1 -11  11    6.00    7.10
   1 -12  -8    0.48    4.02
   1 -12  -7   15.46    3.68
  -1  12   7   21.01    9.53
   1  12  -6    5.59    9.97
  -1  12   6   -9.31   10.86
   1  12  -5   70.88   13.57
  -1  12   5   79.93   14.46
  -1  12   4   14.56   11.52
   1  12  -4   21.23   10.10
   1  12  -3   16.93   10.00
  -1  12   3   30.63   12.91
  -1  12   2   -7.10   10.77
   1  12  -2    6.17    9.24
  -1  12   1   43.56   13.79
   1  12  -1   51.45   11.62
  -1 -12   0    8.81    4.56
   1  12   0   29.88    9.65
  -1 -12  -1   70.98    6.74
   1  12   1   71.03   11.20
   1  12   2   11.38    8.95
  -1 -12  -2   -0.61    4.79
  -1 -12  -3   15.94    4.82
   1  12   3   19.23    7.65
  -1 -12  -4   -3.66    5.44
   1  12   4    2.15    6.59
   1  12   5   17.69    7.43
  -1 -12  -5   14.27    5.46
  -1 -12  -6    6.08    4.94
   1  12   6    2.36    6.14
   1  12   7   21.34    4.99
  -1  13   2   85.03   17.79
  -1  13   1    8.65   13.21
  -1 -13  -2    2.02    3.73
  -2   0  16  260.78   24.19
  -2   0  15   16.45   11.36
  -2   0  14    4.93    9.71
   2   0 -14   15.28    4.25
  -2   0  13    4.59    9.15
  -2   0  13   -2.39    3.86
   2   0 -13   -2.38    3.19
  -2   0  13   -0.57    3.42
  -2   0  12   62.01    6.77
   2   0 -12   76.98    5.71
  -2   0  12   78.71   13.21
   2   0 -11   -0.08    2.67
  -2   0  11   -4.59    7.90
  -2   0  11   -1.77    4.38
   2   0 -10 1128.11   17.66
  -2   0  10 1053.49   32.41
  -2   0  10 1131.75   23.21
   2   0 -10 1127.86   18.63
  -2   0   9    0.17    5.65
   2   0  -9   -0.25    2.24
  -2   0   9    1.40    4.40
   2   0  -9    1.97    2.33
  -2   0   9   -1.35    2.50
  -2   0   8    0.79    5.12
   2   0  -8   10.77    2.81
  -2   0   8    9.81    4.33
   2   0  -8    9.18    2.55
  -2   0   7   -1.49    3.69
   2   0  -7    2.30    2.10
   2   0  -7   -0.82    1.86
  -2   0   7    0.27    4.83
  -2   0   6  844.64   17.20
  -2   0   6  871.42   20.85
   2   0  -6  857.12   11.74
   2   0  -6  802.25   13.32
  -2   0   5   -3.46    2.77
  -2   0   5    1.87    3.59
   2   0  -5   -0.88    1.72
   2   0  -5   -0.05    1.92
   2   0  -4 7818.71   39.55
  -2   0   4 7842.45   40.82
  -2   0   4 7909.56   52.00
   2   0  -4 7854.30   27.08
   2   0  -3   -3.62    2.04
  -2   0   3    1.91    1.76
   2   0  -3   -0.40    2.50
   2   0  -3    0.12    1.19
  -2   0   3   -0.09    3.07
   2   0  -3    0.83    0.99
  -2   0   2  164.97    3.55
   2   0  -2  158.46    5.66
  -2   0   2  157.89    6.16
   2   0  -2  158.60    5.08
   2   0  -1   -0.03    1.71
   2   0  -1   -2.68    2.21
   2   0   0  137.44    4.12
   2   0   0  109.74    3.19
   2   0   1    0.78    1.39
   2   0   2 7220.79   31.07
   2   0   3    0.43    0.53
   2   0   3   -0.37    1.78
   2   0   4  229.15    7.17
   2   0   4  252.75    3.62
   2   0   4  270.92    6.89
   2   0   5    2.11    3.04
   2   0   5    1.91    1.11
   2   0   6  100.20    3.77
   2   0   6   94.72    6.85
   2   0   7    1.47    1.62
   2   0   7    1.18    3.98
   2   0   8 1665.01   31.47
   2   0   8 1643.07   17.84
   2   0   9   -2.31    2.67
   2   0   9   -2.47    6.72
   2   0  10  201.65   16.42
   2   0  11   -5.62    8.20
   2   0  12   52.37   11.44
   2   0  13   17.75    9.49
   2   0  14  343.35   27.28
   2   0  15   25.73   12.52
   2   0  16    9.43   14.50
   2   0  17   16.34   16.94
   2   0  18  -19.42   20.65
   2   0  19  -17.75   24.61
  -2  -1  17    6.50   11.65
  -2  -1  16   22.40   12.96
  -2   1  16  -15.82   15.65
   2  -1 -15   92.97    6.98
  -2   1  15   87.73   19.00
  -2  -1  15   78.76   14.34
  -2   1  14    3.19    2.90
  -2   1  14    2.76    3.14
   2  -1 -14    4.77    3.00
  -2  -1  14   13.82    9.50
   2   1 -14    8.20    3.80
  -2   1  13  758.14   18.21
  -2  -1  13  582.47    9.53
  -2  -1  13  595.15    9.74
   2   1 -13  734.86   17.15
   2  -1 -13  702.23   15.68
  -2  -1  13  718.67   30.41
  -2   1  13  783.48   36.39
  -2  -1  12   -1.70    7.48
  -2  -1  12   -2.85    4.14
   2  -1 -12   -0.80    2.51
   2   1 -12    3.05    3.20
  -2   1  12   -0.79    8.73
  -2   1  12   -0.81    3.83
   2  -1 -11   19.40    3.44
  -2  -1  11   11.15    4.63
  -2   1  11   16.07    5.41
  -2   1  11   16.47    8.89
   2   1 -11   16.97    3.85
  -2  -1  11   15.60    7.83
   2   1 -10   11.85    3.43
  -2   1  10   11.77    7.62
   2  -1 -10   10.13    2.81
  -2  -1  10    6.11    4.37
  -2   1  10    5.55    4.37
  -2  -1  10    4.60    6.01
   2  -1 -10    6.12    2.48
   2   1  -9  175.31    7.57
  -2   1   9  172.49    9.92
  -2  -1   9  181.77    9.50
   2  -1  -9  159.00    7.26
   2   1  -9  178.27    7.50
   2  -1  -9  171.71    6.43
  -2   1   9  178.36   14.75
  -2  -1   9  191.19   12.06
  -2  -1   9  163.53    7.38
   2  -1  -8    6.38    2.17
   2   1  -8    8.56    2.70
   2  -1  -8    7.26    2.69
  -2   1   8   13.42    7.58
   2   1  -8    5.85    2.44
  -2  -1   8    9.33    4.46
  -2  -1   8    6.03    4.30
  -2   1   8    2.30    4.31
  -2   1   7 3166.56   47.12
  -2  -1   7 3190.29   34.68
   2   1  -7 3142.31   26.12
   2  -1  -7 3156.41   22.59
   2  -1  -7 3063.25   27.36
  -2  -1   7 3101.38   37.30
  -2   1   7 3116.08   35.77
   2   1  -6    2.72    2.46
   2   1  -6    4.80    2.02
   2  -1  -6    5.64    1.71
  -2   1   6    4.34    4.70
  -2   1   6    5.90    3.78
   2  -1  -6    4.24    1.92
  -2  -1   6    1.57    3.13
  -2  -1   6    3.33    3.23
  -2   1   5  105.49    6.72
   2   1  -5   75.61    5.57
  -2  -1   5   84.64    5.81
   2  -1  -5   98.50    3.56
  -2   1   5   83.55    8.07
  -2  -1   5   95.02    5.48
   2   1  -5   90.76    4.15
   2  -1  -5   71.15    3.98
   2   1  -4   63.34    3.39
   2  -1  -4   61.30    3.41
  -2   1   4   58.21    4.69
  -2  -1   4   59.34    4.07
   2   1  -4   61.64    4.38
   2  -1  -4   54.13    3.32
   2  -1  -4   55.08    2.40
  -2  -1   4   57.38    4.74
  -2   1   4   46.68    6.39
   2  -1  -3  170.41    3.96
  -2   1   3  174.28    5.71
   2  -1  -3  148.28    8.70
  -2   1   3  171.89    9.46
   2  -1  -3  165.12    3.14
  -2  -1   3  159.29    6.24
   2   1  -3  155.05    3.85
   2  -1  -3  159.72    4.98
  -2  -1   3  159.29    5.09
   2   1  -3  161.58    6.25
   2   1  -3  156.85    4.14
  -2  -1   2   49.00    2.37
  -2   1   2   63.78    7.54
   2  -1  -2   56.32    5.39
   2   1  -2   38.23    3.06
   2   1  -2   45.42    1.94
   2   1  -2   51.65    1.82
  -2   1   2   53.61    2.46
   2   1  -2   42.16    3.94
   2  -1  -2   49.19    2.73
  -2  -1   2   43.22    3.36
   2  -1  -1 4362.37   19.22
   2   1  -1 4511.46   14.50
  -2  -1   1 4270.94   14.73
   2   1  -1 4423.87   22.00
  -2  -1   1 4189.42   25.55
   2  -1   0   47.14    6.72
   2  -1   0   36.79    2.36
   2   1   0   38.45    1.83
   2   1   0   38.80    2.23
   2  -1   0   43.65    1.98
   2   1   1   89.64    3.12
   2   1   1   85.37    2.65
   2  -1   1   89.59    3.63
   2   1   2    3.50    1.68
   2  -1   2    1.97    1.75
   2   1   2    2.30    0.97
   2  -1   3  474.50    9.12
   2   1   3  424.89    5.44
   2  -1   4   18.71    1.29
   2   1   4   11.10    8.40
   2  -1   4   20.75    1.25
   2   1   4   14.29    1.41
   2  -1   4   18.87    2.58
   2  -1   5 3230.50   27.60
   2   1   5 3171.64   18.39
   2  -1   5 3215.92   18.14
   2  -1   5 3232.42   18.14
   2   1   6    6.18    6.96
   2  -1   6    1.85    1.42
   2   1   6    5.82    1.54
   2  -1   6    3.97    2.51
   2  -1   6    4.83    2.17
   2  -1   7   42.82    3.47
   2   1   7   48.39    3.34
   2   1   7   37.52   10.30
   2  -1   7   47.32    4.14
   2  -1   8   14.12    2.81
   2   1   8   12.91    2.55
   2   1   8   16.28   10.13
   2  -1   8    9.19    3.67
   2   1   9   29.75    3.99
   2  -1   9   40.61    6.12
   2   1   9   20.28   10.71
   2  -1   9   52.82    4.60
   2  -1  10   18.25    4.14
   2  -1  10   13.33    5.93
   2   1  10    4.13    9.46
   2   1  11  992.42   43.02
   2  -1  11 1026.00   28.88
   2  -1  12   -4.70    6.79
   2   1  12    7.50   12.13
   2  -1  13   63.93   12.04
   2   1  13   31.01   18.98
   2  -1  14    9.08    9.41
   2   1  14   29.40   18.68
   2   1  15   11.53   19.30
   2  -1  15   14.15    9.23
   2   1  16   -8.01   17.76
   2  -1  16   -6.59   11.02
   2   1  17   63.71   32.02
   2  -1  17  150.09   23.15
   2   1  18   16.53   23.94
   2  -1  18    0.23   14.09
   2  -1  19    4.89   17.37
   2   1  19   -6.52   30.88
  -2  -2  17    1.84   10.27
  -2  -2  16  267.69   23.59
   2  -2 -16  268.55   11.23
  -2  -2  15    0.21    8.72
  -2   2  15    2.01   17.24
   2  -2 -15    4.81    3.74
  -2  -2  14   14.62    8.69
  -2   2  14   15.75    5.09
  -2   2  14   22.71   18.72
   2  -2 -14   13.66    3.86
   2   2 -13    5.03    3.25
  -2  -2  13    6.14    6.88
   2  -2 -13   -2.39    3.13
  -2   2  13   -1.45    4.64
  -2   2  13   -6.92   13.34
  -2   2  12  142.77   21.60
  -2  -2  12  149.56   12.95
   2  -2 -12  179.72    7.71
  -2  -2  12  195.57    7.62
   2   2 -12  177.78    9.07
  -2  -2  12  166.75    7.79
  -2   2  12  181.18   10.25
  -2  -2  11    0.83    3.15
   2   2 -11    0.87    3.48
  -2  -2  11    0.85    3.97
  -2   2  11    9.09    4.65
  -2  -2  11   -3.65    5.48
   2  -2 -11    0.36    2.47
  -2   2  11   10.00   10.39
  -2   2  10 1401.47   27.56
   2  -2 -10 1385.77   20.13
   2   2 -10 1407.32   22.70
  -2  -2  10 1406.35   29.88
  -2  -2  10 1425.71   24.95
   2  -2 -10 1397.99   18.52
   2   2  -9    3.06    2.85
   2  -2  -9    8.94    2.90
   2   2  -9    1.92    2.92
  -2  -2   9   -2.56    4.21
  -2   2   9    8.26    4.65
  -2  -2   9    2.67    4.08
   2  -2  -9    2.28    2.06
  -2  -2   9   -0.89    3.52
  -2   2   9    8.07    9.46
  -2  -2   8  108.87    8.27
   2  -2  -8  104.16    4.79
  -2  -2   8  112.22    7.59
   2   2  -8   85.69    6.27
   2  -2  -8   96.36    5.50
  -2  -2   8   97.67    6.33
  -2   2   8   94.96    8.08
   2   2  -8  117.06    6.46
  -2   2   8  106.37   13.34
  -2   2   7   -3.88    8.86
  -2  -2   7    2.90    3.63
   2   2  -7    0.57    2.59
   2   2  -7    1.85    2.86
  -2  -2   7    1.80    3.64
   2  -2  -7    0.42    2.15
   2  -2  -7    6.38    1.86
  -2   2   7    3.23    4.23
   2   2  -6  172.93    7.83
   2  -2  -6  181.84    6.38
   2  -2  -6  174.19    5.00
   2   2  -6  174.38    6.98
  -2   2   6  177.31    9.10
  -2  -2   6  186.11    8.75
  -2  -2   6  171.01    7.89
  -2   2   6  190.22   16.83
   2   2  -5   31.14    3.96
  -2  -2   5   35.03    3.99
   2  -2  -5   34.47    2.32
   2   2  -5   28.36    3.35
  -2  -2   5   26.42    3.90
   2  -2  -5   31.54    3.05
  -2   2   5   32.81    4.94
  -2  -2   4 2543.96   23.70
   2  -2  -4 2510.02   21.56
   2  -2  -4 2473.83   20.28
   2   2  -4 2492.36   22.22
   2  -2  -4 2498.84   14.86
  -2  -2   4 2518.77   25.82
   2   2  -4 2372.63   25.98
   2   2  -3   26.99    3.71
  -2  -2   3   28.38    2.74
  -2   2   3   37.64    4.06
  -2   2   3   31.88    8.92
   2  -2  -3   32.11    2.62
   2  -2  -3   32.25    1.66
  -2  -2   3   27.65    3.29
   2  -2  -3   18.93    5.34
   2  -2  -3   30.86    2.21
   2   2  -3   29.00    2.92
  -2   2   2   86.69    4.40
   2   2  -2   83.72    3.70
   2  -2  -2   83.84    3.55
   2   2  -2   90.07    2.80
   2  -2  -2  105.67    9.45
  -2  -2   2   92.08    4.53
  -2  -2   2   85.75    3.43
   2  -2  -1   22.18    1.90
   2   2  -1   17.10    1.73
   2   2  -1   20.19    1.29
   2   2  -1   19.85    2.13
  -2  -2   1   18.53    2.48
  -2  -2   1   15.77    1.62
  -2  -2   0   97.41    2.76
   2  -2   0  106.41    3.05
  -2  -2   0  106.89    4.19
   2   2   0  110.29    3.81
   2  -2   0  114.31    4.42
   2  -2   1  194.04    5.67
   2   2   1  209.95    4.84
   2  -2   1  197.09    3.60
   2  -2   2 5646.43   17.29
   2  -2   2 5832.25   31.69
   2  -2   3   10.45    1.04
   2   2   3    6.25    1.47
   2  -2   3   10.40    2.19
   2  -2   3   10.39    1.88
   2  -2   4  323.17    8.46
   2   2   4  288.80    5.80
   2  -2   4  308.40    4.55
   2   2   4  327.30   22.60
   2  -2   4  351.57    6.89
   2  -2   5   51.55    3.35
   2   2   5   50.10    2.86
   2  -2   5   44.20    2.30
   2  -2   5   33.30    3.16
   2   2   6   13.88    2.24
   2   2   6   12.44   14.07
   2  -2   6   14.28    2.77
   2  -2   6   14.21    1.93
   2  -2   6   13.54    3.09
   2  -2   7    1.44    2.41
   2  -2   7   -1.25    2.97
   2  -2   7    3.75    2.03
   2   2   7    4.33    1.93
   2   2   7   -0.63   14.46
   2  -2   8 1733.02   22.91
   2   2   8 1684.62   20.04
   2  -2   8 1634.86   21.12
   2   2   8 1605.06   68.09
   2  -2   9    2.62    2.93
   2  -2   9   -3.57    3.40
   2   2   9    3.60   16.15
   2   2  10   -4.45   19.80
   2  -2  10   77.37    6.43
   2   2  11   -9.73   17.32
   2  -2  11    1.41    4.40
   2   2  12   11.00   19.00
   2  -2  12   18.17    6.30
   2   2  13   13.60   21.49
   2  -2  13    0.37    6.61
   2  -2  14  358.18   21.88
   2   2  14  224.69   44.72
   2  -2  15    9.77    8.67
   2   2  15  -29.83   28.20
   2   2  16   -6.96   26.07
   2  -2  16   32.10   12.60
   2  -2  17   19.83   12.42
   2   2  17   -4.20   29.51
   2  -2  18   -4.08   11.89
   2   2  18   42.38   32.75
   2   2  19   62.44   34.40
   2  -3 -17   20.14    4.68
  -2  -3  17   14.79    9.52
  -2  -3  16    2.56    9.61
   2  -3 -16    0.93    3.51
  -2  -3  15   60.58   10.73
   2  -3 -15   74.19    6.10
   2  -3 -14   -0.42    3.04
  -2   3  14   12.84   19.61
  -2  -3  14    1.24    7.54
  -2   3  14    3.75    4.68
   2  -3 -13  399.55   11.49
   2   3 -13  388.00   14.13
  -2  -3  13  398.72   19.35
  -2   3  12    9.21   18.56
   2  -3 -12   15.25    3.17
  -2   3  12   12.26    5.50
  -2  -3  12   16.51    6.68
   2   3 -12   13.59    4.00
   2  -3 -11   11.00    3.17
  -2   3  11   -5.11   17.14
  -2  -3  11    1.79    3.45
   2   3 -11    3.77    3.39
  -2  -3  11    4.77    4.01
  -2   3  11   11.56    4.84
  -2  -3  11   11.13    5.32
   2  -3 -10    4.53    2.40
  -2   3  10   -1.87   14.69
  -2  -3  10    0.63    4.09
  -2  -3  10   -1.92    4.63
  -2   3  10   -2.25    4.49
   2   3 -10   -0.95    3.31
   2  -3  -9  200.00    6.83
  -2   3   9  210.51   11.97
   2  -3  -9  204.66    7.97
  -2  -3   9  208.35   10.58
  -2   3   9  166.23   28.62
  -2  -3   9  175.93   10.25
   2   3  -9  214.01    9.37
  -2  -3   8   16.56    4.87
   2   3  -8   13.92    3.68
  -2  -3   8   21.37    4.38
   2  -3  -8   17.35    3.05
   2   3  -8   23.73    4.32
   2  -3  -8   16.86    2.63
  -2  -3   8   13.04    4.01
  -2   3   8   12.68    5.15
  -2   3   8   14.27   13.57
  -2  -3   7 2132.89   28.78
  -2   3   7 2046.79   33.08
   2  -3  -7 2067.33   22.63
   2   3  -7 2125.56   26.53
   2   3  -7 2075.25   28.45
  -2  -3   7 2131.48   29.89
   2  -3  -7 2076.94   18.34
  -2  -3   6    9.07    2.86
   2  -3  -6    4.92    1.59
   2   3  -6    2.41    2.86
   2  -3  -6    6.13    2.19
  -2   3   6    5.70   11.61
   2   3  -6    7.21    3.13
  -2  -3   6    3.82    2.90
  -2   3   6    2.00    4.43
  -2  -3   5  198.63    8.22
   2  -3  -5  164.52    7.39
  -2   3   5  202.19   10.64
   2   3  -5  198.24    7.92
   2  -3  -5  176.68    6.21
   2   3  -5  186.69    8.70
   2  -3  -5  180.56    4.98
  -2  -3   5  191.60    8.02
   2   3  -4    1.76    3.14
  -2   3   4   -1.88    7.60
   2  -3  -4    0.85    1.77
  -2  -3   4   -0.57    2.19
   2  -3  -4    1.73    2.15
  -2   3   4    0.86    3.73
   2   3  -4   -0.79    2.64
  -2  -3   4   -0.20    2.26
   2  -3  -4   -0.87    1.24
   2  -3  -3  119.36    4.41
  -2   3   3  129.26    7.40
   2   3  -3  107.73    5.56
   2  -3  -3  118.44    4.72
   2  -3  -3  134.36    3.31
  -2  -3   3  114.28    5.56
  -2  -3   3   99.50    4.81
   2  -3  -2   73.90   10.78
  -2  -3   2   46.22    3.11
  -2   3   2   60.47    5.28
   2  -3  -2   51.66    3.15
  -2  -3   2   60.29    4.18
   2   3  -2   62.40    4.27
   2  -3  -1 3243.60   20.39
  -2  -3   1 3333.36   21.39
   2   3  -1 3275.16   17.79
  -2  -3   1 3352.51   25.45
   2   3  -1 3325.63   24.63
  -2  -3   1 3353.62   21.95
  -2  -3   0   -0.45    1.84
  -2  -3   0    1.42    1.39
   2  -3   0    0.27    1.91
   2  -3   0    0.87    1.39
   2   3   0    1.11    1.90
   2   3   0    1.28    1.02
   2   3   1  417.71    6.15
  -2  -3  -1  393.80    6.55
   2  -3   1  389.18    6.57
  -2  -3  -1  440.41    8.83
   2   3   1  407.69    7.83
   2  -3   1  407.19    8.86
   2   3   1  404.04    4.74
   2  -3   2    7.91    1.52
  -2  -3  -2    7.60    1.45
   2   3   2    9.12    1.86
   2  -3   2    5.45    2.20
  -2  -3  -3  128.25    3.76
   2   3   3  121.20    4.61
   2  -3   3  147.68    6.18
   2  -3   3  140.52    3.78
  -2  -3  -4   39.12    2.33
   2  -3   4   36.58    2.22
   2  -3   4   33.76    3.45
   2   3   4   44.19    2.87
   2   3   5 2495.27   21.16
   2  -3   5 2480.08   17.28
  -2  -3  -5 2468.12   17.21
   2  -3   5 2539.77   25.88
  -2  -3  -6   66.70    3.22
   2  -3   6   69.05    4.82
   2  -3   6   77.25    3.65
   2  -3   6   76.28    5.79
   2   3   6   69.94    3.99
   2   3   7  125.87    5.64
   2  -3   7  119.94    5.14
   2  -3   7  127.05    7.00
   2   3   7  136.74   23.46
   2  -3   7  147.13    7.73
   2  -3   8    0.61    3.07
   2   3   8   11.49   16.06
   2  -3   8    3.91    3.37
   2  -3   8    0.05    2.49
   2  -3   9   22.35    3.58
   2   3   9   14.91   19.55
   2  -3   9   24.25    4.73
   2   3  10   20.14   19.88
   2  -3  10    2.04    3.92
   2   3  11  906.81   73.60
   2  -3  11  755.27   19.23
   2   3  12    2.79   22.29
   2  -3  12   16.33    4.72
   2   3  13   11.05   25.98
   2  -3  13   82.17    9.30
   2   3  14    9.03   25.38
   2  -3  14    2.35    6.40
   2  -3  15    0.45    7.81
   2   3  15   77.41   31.28
   2  -3  16  -11.02    9.37
   2   3  17   17.77   27.73
   2  -3  17  123.20   18.22
   2  -3  18   -3.85   12.37
   2  -4 -19    2.82    4.09
   2  -4 -18   32.01    5.23
   2  -4 -17   -1.24    3.76
   2  -4 -16  182.43    9.16
  -2  -4  16  172.94   16.84
   2  -4 -15    7.11    3.61
  -2  -4  15   10.78    8.98
  -2   4  15    6.29    3.94
   2  -4 -14   24.70    3.94
  -2   4  14   11.94    5.28
  -2  -4  14   13.47    6.65
   2  -4 -13    1.19    3.07
  -2   4  13    5.63    5.53
  -2  -4  13    3.03    5.36
   2  -4 -12   65.53    4.99
  -2  -4  12   61.70    8.51
  -2   4  12   69.28   27.80
   2   4 -12   68.59    6.77
  -2   4  12   65.44    7.25
   2  -4 -11    4.82    2.50
  -2  -4  11   11.41    3.74
  -2  -4  11    6.26    5.32
  -2  -4  11    2.35    3.35
  -2   4  11    5.79    4.90
   2   4 -11   17.74    4.71
   2  -4 -10  670.76   12.86
  -2  -4  10  715.66   21.61
  -2   4  10  646.61   19.92
  -2  -4  10  739.77   16.77
   2   4 -10  680.52   17.87
  -2   4  10  772.60   57.33
   2   4  -9   43.37    5.36
  -2  -4   9   49.07    6.55
   2  -4  -9   45.55    4.43
  -2   4   9   31.70    5.62
   2  -4  -9   50.14    3.83
  -2  -4   9   42.25    5.87
  -2  -4   8   42.71    5.77
   2  -4  -8   43.88    4.31
  -2   4   8   36.93    6.53
  -2  -4   8   41.57    5.55
   2  -4  -8   42.40    3.36
   2   4  -8   34.55    4.98
  -2  -4   7    9.69    3.95
   2  -4  -7   10.43    2.46
   2   4  -7    3.37    3.08
  -2  -4   7    4.70    3.89
   2  -4  -7    4.05    2.14
  -2   4   7   12.19    5.62
  -2   4   7   15.63   12.73
   2   4  -7   10.28    4.05
   2   4  -6  355.65   12.65
  -2  -4   6  376.94   12.37
   2  -4  -6  393.64   10.13
  -2  -4   6  418.10   12.94
  -2   4   6  466.21   28.74
  -2   4   6  459.00   17.03
   2  -4  -6  405.44    8.18
   2   4  -6  384.69   12.43
  -2  -4   5   33.83    4.41
   2  -4  -5   32.68    4.20
   2  -4  -5   31.85    3.44
   2  -4  -5   23.02    2.37
  -2   4   5   23.66    5.84
  -2  -4   5   36.02    4.01
  -2   4   5   32.12   12.12
   2   4  -5   43.04    5.34
   2   4  -5   30.01    4.34
  -2  -4   4 3050.23   29.18
   2  -4  -4 2955.12   27.49
   2  -4  -4 3030.27   18.82
  -2  -4   4 2990.61   30.63
   2   4  -4 2991.81   31.54
   2   4  -4 3001.79   37.91
   2  -4  -4 3027.35   25.28
  -2   4   3  192.97   10.48
   2  -4  -3  193.49    6.51
   2   4  -3  145.80    7.27
  -2  -4   3  163.72    7.31
  -2  -4   3  154.20    6.43
   2  -4  -3  200.21    4.93
   2  -4  -3  172.63    5.62
  -2  -4   2   27.84    3.06
   2   4  -2   25.03    3.99
  -2   4   2   36.38    5.56
   2  -4  -2   29.74    2.91
   2  -4  -2   32.89    8.14
  -2  -4   2   33.33    3.53
  -2  -4   1   15.82    0.86
   2  -4  -1   16.33    2.23
  -2  -4   1   20.84    2.81
  -2   4   1   20.51    4.18
   2  -4  -1   16.43    8.09
   2   4  -1   20.62    3.48
  -2  -4   1   15.80    2.61
  -2  -4   0   85.77    4.06
   2  -4   0  104.83    4.31
   2   4   0   96.43    3.43
  -2  -4   0   92.07    5.03
   2  -4   0  115.57    5.49
   2   4   0  102.57    5.45
   2   4   1   37.32    3.66
   2  -4   1   28.74    2.59
  -2  -4  -1   31.38    3.18
  -2  -4  -1   31.22    2.68
   2  -4   1   31.59    3.28
   2   4   1   32.34    2.12
   2  -4   2 2684.17   24.98
   2   4   2 2624.11   15.31
   2  -4   2 2551.82   19.56
  -2  -4  -2 2558.36   19.69
  -2  -4  -2 2661.84   24.69
   2   4   2 2646.14   20.62
   2   4   3   89.73    2.75
   2   4   3   89.12    2.38
  -2  -4  -3   86.35    3.82
   2  -4   3   96.44    4.08
  -2  -4  -3   98.27    4.86
   2  -4   4  170.89    7.08
   2  -4   4  194.57    5.57
   2   4   4  171.11    6.07
  -2  -4  -4  187.82    5.45
   2  -4   5    2.46    1.72
   2   4   5    7.50    2.25
  -2  -4  -5    4.38    1.90
   2  -4   5    6.02    2.62
  -2  -4  -6   55.96    3.57
   2  -4   6   55.77    4.88
   2  -4   6   62.80    3.75
   2  -4   7   52.52    3.90
   2  -4   7   44.92    4.77
   2  -4   8  827.96   18.09
   2  -4   8  866.54   14.97
   2  -4   9   17.33    4.19
   2   4   9   22.80   20.12
   2  -4   9   26.45    4.05
   2  -4  10  128.15    7.46
   2   4  10  147.20   33.17
   2  -4  11    1.83    4.11
   2   4  11  -13.50   21.63
   2  -4  12   49.27    6.25
   2   4  12   51.17   25.58
   2   4  13   39.64   26.32
   2  -4  13    3.95    5.02
   2   4  14  206.17   48.25
   2  -4  14  261.25   15.02
   2   4  15    4.21   24.15
   2  -4  15   10.78    7.46
   2   4  16    1.87   27.82
   2  -4  16   24.91    9.31
   2   4  17  -41.25   32.64
   2  -4  17    5.22    8.74
   2  -4  18  -13.91   11.80
   2   4  18    9.77   28.67
   2  -5 -19   49.53    6.48
   2  -5 -18    6.84    3.67
   2  -5 -17   12.96    4.43
   2  -5 -16   10.58    3.76
  -2   5  15   64.18    6.18
   2  -5 -15   62.98    5.81
  -2  -5  15   52.04    9.74
  -2   5  14   23.00    6.98
   2  -5 -14   14.45    3.58
  -2   5  13  346.84   15.38
   2  -5 -13  352.07   10.86
  -2  -5  13  321.44   17.26
   2  -5 -12   11.91    3.52
  -2  -5  12   11.98    4.90
  -2   5  12   11.89    5.37
  -2   5  11   22.30    6.63
   2  -5 -11   24.08    3.57
  -2  -5  11   22.59    6.26
   2   5 -11   28.71    5.59
  -2   5  10    3.20    5.85
  -2  -5  10   -2.64    3.78
  -2  -5  10    1.33    3.35
   2   5 -10    5.31    4.38
   2  -5 -10    1.52    2.77
   2   5  -9  152.56    9.55
  -2  -5   9  153.08    9.26
  -2   5   9  134.11   10.60
   2  -5  -9  150.55    6.36
  -2   5   8   29.40    6.66
   2   5  -8   44.39    5.77
   2  -5  -8   39.96    3.52
  -2  -5   8   40.61    5.52
   2  -5  -8   36.65    4.30
  -2   5   8   35.53   18.55
  -2  -5   8   57.98    6.68
   2   5  -7 1205.56   23.99
   2  -5  -7 1283.44   20.04
   2  -5  -7 1235.05   15.51
  -2  -5   7 1177.55   23.37
  -2  -5   7 1349.86   24.39
  -2   5   7 1057.02   25.67
  -2  -5   6   47.57    5.61
   2  -5  -6   60.73    4.93
   2   5  -6   56.04    5.80
   2  -5  -6   55.82    3.56
  -2  -5   6   45.09    5.13
  -2   5   6   39.12    7.24
   2   5  -6   37.15    5.19
  -2  -5   5   10.67    3.75
   2   5  -5   21.10    4.50
   2  -5  -5   26.56    3.84
   2  -5  -5   23.28    2.58
  -2  -5   5   15.41    3.92
   2  -5  -5   20.82    4.17
   2   5  -5   25.88    5.33
  -2   5   5   27.67    7.11
  -2  -5   4    0.92    2.85
   2  -5  -4    2.28    1.79
  -2  -5   4    1.36    3.11
   2  -5  -4    1.74    1.73
  -2   5   4    1.01    4.92
   2  -5  -4    0.55    2.20
   2   5  -4    6.05    3.82
   2  -5  -4    2.90    3.12
   2   5  -4   -1.41    4.51
   2  -5  -3  156.56    4.53
   2  -5  -3  158.62    5.84
   2   5  -3  175.52    8.90
  -2   5   3  173.33   11.25
   2  -5  -3  168.29    6.69
  -2  -5   3  151.54    7.12
  -2  -5   3  152.71    7.24
   2   5  -2   39.65    5.16
  -2  -5   2   43.89    4.09
   2  -5  -2   31.03    3.28
  -2  -5   2   33.97    1.51
  -2  -5   2   37.26    4.10
  -2   5   2   37.29    6.23
  -2  -5   1 1991.53   21.66
   2  -5  -1 1622.69   45.98
  -2  -5   1 2045.61   23.87
  -2  -5   1 1999.79   11.09
   2  -5  -1 2001.53   20.81
   2   5  -1 2018.22   27.06
  -2   5   1 2394.20   35.86
  -2  -5   0   72.14    4.64
   2   5   0   74.40    5.94
  -2  -5   0   74.85    4.55
   2  -5   0   79.07    4.55
   2   5   0   74.79    3.57
  -2  -5   0   78.23    5.11
   2  -5   0   70.28    4.89
  -2   5   0  102.10    8.44
  -2   5  -1   60.24    6.54
   2   5   1   55.63    5.26
   2  -5   1   48.51    4.20
   2   5   1   56.35    3.19
  -2  -5  -1   58.59    3.89
  -2  -5  -1   49.31    4.17
   2  -5   1   47.00    3.68
   2  -5   2   17.25    2.62
  -2  -5  -2   11.90    2.83
   2  -5   2   16.43    3.10
   2   5   2   13.62    1.87
   2   5   2   14.52    3.74
  -2  -5  -2   13.25    2.50
   2   5   3  187.34    6.83
   2   5   3  191.78    5.02
  -2  -5  -3  168.73    5.98
   2  -5   3  195.04    6.51
  -2  -5  -3  174.53    7.25
   2  -5   3  193.58    7.93
   2  -5   4   17.85    3.65
   2   5   4   15.52    1.72
  -2  -5  -4   16.33    2.55
   2  -5   4    9.39    2.43
   2   5   4   14.10    2.41
  -2  -5  -5 1402.83   16.92
   2  -5   5 1406.71   17.27
   2  -5   5 1373.64   21.15
  -2  -5  -6   59.57    3.94
   2  -5   6   68.98    4.37
   2  -5   6   67.98    5.73
   2  -5   7   80.36    5.55
   2  -5   7   92.52    5.12
   2  -5   8    4.71    2.71
   2  -5   8    1.88    3.28
   2  -5   9   21.53    3.56
   2  -5   9   35.86    5.52
   2  -5  10   16.07    3.88
   2  -5  11  341.54   13.12
   2  -5  12    9.78    4.71
   2   5  13    7.45   27.83
   2  -5  13   50.83    7.16
   2  -5  14    8.07    6.04
   2  -5  15    8.52    6.61
   2  -5  16   14.27    8.14
   2  -5  17   64.29   12.23
   2  -6 -18   25.49    5.36
   2  -6 -17    2.76    3.99
   2  -6 -16  111.42    7.77
   2  -6 -15   -0.23    3.38
  -2   6  15    1.97    4.88
  -2  -6  14    3.40    6.22
   2  -6 -14    9.81    3.58
  -2  -6  13    6.05    5.99
  -2   6  13   -3.22    5.89
   2  -6 -13    2.62    3.33
  -2   6  12   60.92    8.78
   2  -6 -12   65.71    5.41
  -2  -6  12   57.21    8.48
  -2  -6  11   18.63    6.09
   2  -6 -11   13.96    3.37
  -2   6  11   18.69    7.08
   2   6 -11    6.45    4.63
   2  -6 -10  482.97   11.71
  -2  -6  10  455.80   17.64
  -2   6  10  430.13   17.17
  -2  -6   9   13.50    5.06
   2  -6  -9   28.60    3.58
  -2  -6   9   18.66    5.11
  -2   6   9   28.91    7.46
   2   6  -9   27.47    5.69
  -2   6   8   51.90    8.28
   2   6  -8   50.00    6.80
   2  -6  -8   41.85    3.69
  -2  -6   8   48.95    6.16
  -2  -6   8   49.84    6.03
  -2  -6   7    0.36    3.49
   2  -6  -7    2.72    2.26
  -2  -6   7    6.19    4.55
  -2   6   7    3.04    6.39
   2  -6  -7    2.18    2.77
   2   6  -7    1.24    4.38
  -2  -6   6  118.65    8.46
  -2   6   6  102.64   10.27
   2   6  -6  100.03    8.27
   2  -6  -6  112.07    6.48
   2  -6  -6  112.20    5.20
  -2  -6   6   95.65    7.38
   2  -6  -5   39.90    3.49
  -2  -6   5   32.32    5.07
  -2   6   5   52.09    7.91
  -2  -6   5   40.98    5.22
   2  -6  -5   36.89    4.35
   2   6  -5   37.83    5.84
   2  -6  -5   40.42    3.47
   2  -6  -4  944.77   12.91
   2  -6  -4  889.59   16.89
   2   6  -4  974.89   22.29
   2  -6  -4  914.78   16.58
  -2   6   4  914.88   24.81
  -2  -6   4  949.29   19.39
  -2  -6   4  914.77   19.05
   2  -6  -3   98.31    4.07
   2  -6  -3   90.41    4.68
   2   6  -3   89.11    7.61
   2  -6  -3   97.66    5.82
  -2  -6   3   92.31    6.36
  -2  -6   3   79.95    6.08
  -2   6   3   72.08    8.05
  -2   6   2   57.05    7.45
  -2  -6   2   70.44    2.55
   2  -6  -2   68.01    5.00
   2   6  -2   68.15    6.55
  -2  -6   2   69.05    5.48
  -2  -6   2   72.84    5.54
   2  -6  -1   35.19    4.11
  -2  -6   1   27.09    1.89
  -2  -6   1   21.07    3.33
  -2  -6   1   20.61    3.56
  -2   6   1   26.89    6.22
   2   6  -1   22.04    4.88
  -2  -6   0  212.29    8.16
  -2   6   0  192.87   11.60
  -2  -6   0  195.70    8.58
   2   6   0  197.22    9.64
   2  -6   0  211.89    7.83
   2  -6   0  232.35    9.05
   2  -6   1  165.64    7.74
   2   6   1  164.46    8.73
  -2  -6  -1  157.30    6.67
   2  -6   1  148.09    6.62
  -2  -6  -1  178.57    7.96
  -2  -6  -1  167.20    7.17
   2  -6   2 1511.13   19.87
  -2  -6  -2 1433.61   19.12
   2  -6   2 1483.12   21.92
   2   6   3   61.63    5.45
   2  -6   3   74.37    4.90
   2  -6   3   67.50    5.58
  -2  -6  -3   59.31    4.48
   2   6   4   99.01    4.31
  -2  -6  -4   89.42    5.10
   2  -6   4   99.76    5.49
   2   6   4   99.80    5.69
   2  -6   4  102.59    6.80
   2   6   5   12.93    1.99
   2  -6   5   12.75    3.56
   2   6   5   12.52    2.38
  -2  -6  -5   16.10    2.86
   2  -6   5   11.60    2.89
  -2  -6  -6   88.34    5.36
   2  -6   6   78.47    6.06
   2  -6   6   74.37    5.09
   2  -6   7   13.48    3.38
   2  -6   7   10.40    3.51
   2  -6   8  581.88   16.31
   2  -6   8  599.01   14.74
   2  -6   9    8.09    3.64
   2  -6   9   13.06    5.02
   2  -6  10   40.76    5.65
   2  -6  10   44.00    5.57
   2  -6  11   -2.21    3.95
   2  -6  12   12.83    4.81
   2  -6  13    5.33    5.24
   2  -6  14  147.50   11.67
   2  -6  15    1.92    6.28
   2  -6  16   41.74    9.39
   2  -7 -17    0.35    4.03
   2  -7 -16   -0.31    3.98
   2  -7 -15   52.11    5.75
  -2   7  15   34.82    6.20
  -2   7  14    3.04    6.79
   2  -7 -14    5.84    3.69
  -2   7  13   81.74    9.27
   2  -7 -13  104.16    6.79
  -2   7  12    5.49    6.18
   2  -7 -12    7.82    3.04
   2  -7 -11    4.82    2.95
  -2   7  11    4.30    5.83
  -2  -7  11   11.39    6.23
   2  -7 -10   -0.55    2.64
  -2  -7  10    3.83    4.68
  -2   7  10    9.80    6.92
   2   7 -10    2.99    5.15
  -2  -7   9   90.50    5.16
  -2  -7   9  110.66    5.60
  -2   7   9  135.27   11.94
   2   7  -9  135.11   10.63
   2  -7  -9  119.26    6.25
  -2  -7   9  109.35    8.91
   2  -7  -8   18.36    3.11
  -2   7   8   16.18    6.86
  -2  -7   8   25.05    5.18
  -2  -7   8   24.39    5.61
   2   7  -8   20.19    5.76
  -2  -7   7  668.57   18.45
  -2   7   7  604.05   23.29
   2  -7  -7  627.15   12.33
  -2  -7   7  556.89   17.51
   2   7  -7  606.07   19.89
  -2   7   6   45.32    9.81
   2  -7  -6   39.06    5.13
   2  -7  -6   32.73    3.73
  -2  -7   6   26.28    5.33
  -2  -7   6   33.43    5.96
   2   7  -6   20.89    5.54
   2  -7  -6   31.99    3.86
   2  -7  -5   59.61    4.37
   2   7  -5   65.19    7.71
   2  -7  -5   62.64    5.64
  -2   7   5   77.62   10.50
  -2  -7   5   55.49    6.22
  -2  -7   5   63.07    6.70
  -2  -7   4   -2.78    4.04
   2  -7  -4    1.24    2.33
  -2  -7   4    3.53    3.72
  -2   7   4   -2.03    6.81
   2   7  -4    3.89    4.27
   2  -7  -4   -1.11    2.78
   2  -7  -3   84.92    3.59
  -2   7   3  106.73   11.95
   2  -7  -3   93.54    6.52
  -2  -7   3   84.54    6.51
   2   7  -3  111.46    9.18
  -2  -7   3   92.06    6.89
   2  -7  -3   86.72    4.28
  -2   7   2   47.69    9.71
   2   7  -2   46.62    6.56
   2  -7  -2   44.73    4.93
  -2  -7   2   47.80    5.18
  -2  -7   2   34.71    4.61
   2   7  -1  910.41   21.69
   2  -7  -1  968.49   18.03
  -2  -7   1  935.03   18.56
   2  -7   0   55.72    5.02
   2   7   0   46.28    6.36
   2  -7   0   57.03    5.39
  -2  -7   0   45.47    4.74
   2   7   1  117.46    8.11
   2  -7   1  121.19    7.34
   2  -7   1  134.05    7.00
  -2  -7  -1  129.47    7.29
  -2  -7  -2    0.78    2.86
   2   7   2    7.39    4.43
   2  -7   2   -2.27    2.88
   2  -7   2   -0.45    3.09
  -2  -7  -2   -2.26    2.85
   2   7   3   32.03    5.50
  -2  -7  -3   42.16    4.18
   2  -7   3   43.91    4.92
   2   7   4   52.84    5.45
   2  -7   4   46.10    4.77
  -2  -7  -4   61.94    4.99
   2  -7   4   46.16    5.53
   2   7   5  660.54   13.23
   2  -7   5  633.77   16.18
  -2  -7  -5  667.97   14.54
   2  -7   5  660.34   15.02
  -2  -7  -6   16.24    3.35
   2  -7   6   24.47    3.94
  -2  -7  -7   81.73    5.91
   2  -7   7   81.91    6.28
   2  -7   8   -2.09    3.30
   2  -7   8   -6.18    4.23
   2  -7   9   18.49    5.21
   2  -7   9   26.27    4.94
   2  -7  10   13.61    4.16
   2  -7  10    7.77    4.61
   2  -7  11  235.93   11.96
   2  -7  12    7.33    5.00
   2  -7  13   41.87    7.01
   2  -7  14   -1.70    6.07
   2  -7  15   -5.43    7.78
   2  -8 -16   62.39    6.28
   2  -8 -15    7.16    3.91
  -2   8  15    1.94    4.35
   2  -8 -14   11.22    3.76
  -2   8  14   10.18    6.27
  -2   8  13   -2.92    6.27
   2  -8 -13    3.40    3.54
   2  -8 -12   38.60    4.76
  -2   8  12   25.31    8.08
  -2   8  11   17.91    6.91
   2  -8 -11    4.59    3.30
  -2   8  10  181.35   14.53
   2   8 -10  168.74   12.92
   2  -8 -10  182.72    8.10
   2  -8  -9   16.62    3.40
  -2   8   9   16.07    7.64
   2   8  -9   16.54    6.45
   2  -8  -8   35.71    4.20
  -2  -8   8   29.59    4.68
   2   8  -8   30.47    7.26
   2  -8  -8   37.28    4.16
   2  -8  -7   -0.45    3.05
  -2  -8   7    4.80    4.89
  -2   8   7    2.64    7.40
   2   8  -7   -3.08    5.53
   2  -8  -7   -2.07    3.03
  -2  -8   6  112.72    8.69
  -2   8   6  100.17   11.33
   2   8  -6  100.12    9.72
   2  -8  -6  106.10    5.71
   2  -8  -5   28.11    3.73
  -2  -8   5   32.47    6.01
   2   8  -5   34.89    7.14
  -2   8   5   27.36    8.18
   2  -8  -5   17.94    4.60
  -2  -8   4  469.22   15.51
   2   8  -4  459.57   18.06
   2  -8  -4  496.44   14.91
  -2   8   4  475.75   21.43
   2  -8  -4  464.29    9.13
  -2  -8   3   10.02    4.18
   2  -8  -3   23.83    4.44
  -2   8   3   28.14    7.83
   2   8  -3   12.17    5.57
   2   8  -2   59.86    7.71
  -2  -8   2   55.87    6.13
   2  -8  -2   60.23    5.78
   2  -8  -1   11.23    3.76
   2  -8  -1    4.47    3.68
  -2  -8   1    6.43    4.00
   2   8  -1    7.66    4.73
  -2  -8   0   58.56    5.79
   2  -8   0   77.80    6.62
   2   8   0   69.01    7.69
   2  -8   0   70.90    5.93
   2  -8   1    8.13    3.54
  -2  -8  -1   11.07    3.51
   2   8   1   20.06    5.46
   2  -8   1    9.14    4.01
  -2  -8  -2  501.32   14.57
   2   8   2  501.84   16.41
   2  -8   2  486.61   13.96
   2  -8   2  531.31   15.30
  -2  -8  -3   30.43    4.66
  -2  -8  -3   29.56    4.57
   2  -8   3   39.23    5.24
   2   8   3   25.44    5.18
   2   8   4   80.76    6.85
  -2  -8  -4   92.12    6.36
   2  -8   4   77.94    6.26
   2  -8   4   78.44    7.25
   2  -8   5    7.00    3.70
   2  -8   5    5.39    3.62
   2   8   5    1.55    3.66
  -2  -8  -5    7.51    3.51
   2   8   6   34.82    3.21
  -2  -8  -6   34.87    4.73
   2  -8   6   36.53    5.04
   2   8   6   36.47    3.00
   2  -8   6   28.76    5.07
   2  -8   7   25.33    5.01
  -2  -8  -7   29.94    4.66
   2  -8   7   31.74    5.07
   2  -8   8  257.15   11.50
   2  -8   8  236.06   11.84
   2  -8   9   26.38    5.50
   2  -8   9   19.74    4.88
   2  -8  10   37.92    6.21
   2  -8  10   34.46    5.88
   2  -8  11    4.47    4.94
   2  -8  12    3.63    5.36
   2  -8  13    3.80    5.75
   2  -8  14   60.98    9.53
  -2   9  14    4.79    6.43
   2  -9 -14   -6.36    4.62
  -2   9  13   86.13    9.67
   2  -9 -13   69.27    6.28
   2  -9 -12    3.40    3.53
  -2   9  12   21.25    7.92
  -2   9  11   31.83    8.90
   2  -9 -11   15.19    4.01
   2  -9 -10    3.50    3.66
  -2   9  10   -4.79    7.57
   2  -9 -10   -1.04    3.37
   2   9  -9   47.25    8.55
   2  -9  -9   22.32    5.76
  -2   9   9   33.38    8.91
   2  -9  -9   45.60    5.57
   2  -9  -8    8.67    3.66
   2   9  -8    8.66    6.45
  -2  -9   7  157.86    7.71
  -2   9   7  195.97   16.72
   2   9  -7  202.25   13.98
   2  -9  -7  185.71    7.82
   2  -9  -6   27.05    3.75
  -2  -9   6   30.24    6.22
  -2   9   6   32.15   10.22
   2  -9  -5   24.55    3.44
  -2  -9   5   32.14    6.18
  -2   9   5   23.10    8.26
   2   9  -5   32.65    7.75
  -2  -9   4   -1.67    4.78
   2  -9  -4    4.12    3.97
   2   9  -4    0.73    5.82
  -2  -9   3   61.17    6.93
  -2   9   3   83.26   13.53
   2   9  -3   52.61    7.60
   2  -9  -3   73.76    7.03
  -2  -9   2   36.31    5.83
   2  -9  -2   29.55    5.31
   2  -9  -2   30.70    4.91
   2   9  -2   28.43    6.89
   2  -9  -1  355.21   13.36
  -2  -9   1  309.79   12.63
   2   9  -1  314.72   15.41
   2  -9  -1  327.17   12.80
   2  -9   0   31.59    5.50
   2  -9   0   35.72    5.34
  -2  -9   0   21.26    4.96
   2   9   0   28.95    6.56
   2   9   1   53.84    7.56
   2  -9   1   65.89    6.44
   2  -9   1   59.25    6.44
  -2  -9  -1   63.39    6.33
  -2  -9  -2    1.16    3.66
   2  -9   2    0.73    3.89
   2   9   2    0.80    4.84
   2  -9   2    5.33    4.00
   2   9   3   53.85    6.82
   2  -9   3   65.80    6.87
   2  -9   3   63.60    6.44
  -2  -9  -3   53.69    5.88
  -2  -9  -4   25.89    5.02
   2  -9   4   22.61    4.85
  -2  -9  -4   26.09    4.75
   2   9   4   25.53    5.56
   2  -9   4   11.31    4.66
  -2  -9  -5  246.20   11.19
   2   9   5  251.29   10.20
  -2  -9  -5  247.92   10.66
   2  -9   5  278.20   12.52
   2   9   6   20.10    3.47
   2  -9   6   22.51    5.47
  -2  -9  -6   17.68    4.33
   2  -9   6   28.21    5.11
   2  -9   7   54.33    6.71
  -2  -9  -7   49.78    5.65
   2  -9   7   64.01    6.79
   2  -9   8   -1.37    4.50
   2  -9   8   -5.59    4.65
  -2  -9  -8   -0.51    3.55
   2  -9   9   19.67    5.59
   2  -9   9    9.68    4.54
   2  -9  10    4.00    4.72
   2  -9  10    5.87    5.10
   2  -9  11   78.62    8.60
   2  -9  12   10.97    6.53
   2  -9  13   23.94    7.86
   2 -10 -12   32.11    5.65
  -2  10  12   16.75    7.13
   2 -10 -11    4.01    3.82
  -2  10  11   26.74    8.42
   2 -10 -10   77.51    6.19
  -2  10  10   57.97   10.53
   2 -10  -9    9.34    3.88
  -2  10   9   16.00    9.40
   2  10  -9    8.53    7.39
  -2  10   8   39.96   10.60
   2 -10  -8   23.09    4.08
   2  10  -8   22.65    8.28
   2 -10  -7    0.55    3.19
  -2  10   7   -5.16    9.29
   2  10  -7   -2.76    7.70
  -2 -10   6   34.35    4.53
   2  10  -6   80.01   11.14
  -2  10   6   59.06   12.41
   2 -10  -6   24.66    2.57
  -2 -10   5    7.35    5.24
  -2  10   5    6.46   10.31
   2  10  -5    8.43    7.23
  -2 -10   4  184.12   10.98
   2  10  -4  157.87   13.44
  -2 -10   3   18.07    5.79
   2  10  -3   18.41    7.13
   2 -10  -3   28.95    5.98
   2 -10  -2   36.88    6.12
   2  10  -2   35.93    8.10
   2 -10  -2   39.19    5.75
  -2 -10   2   41.94    6.74
  -2 -10   1    3.19    4.46
   2  10  -1   -5.16    6.64
   2 -10  -1    9.04    4.26
   2 -10  -1    3.57    4.33
  -2 -10   0   54.53    6.61
   2  10   0   55.64    8.03
   2 -10   0   70.53    7.46
  -2 -10  -1   24.91    5.28
   2 -10   1   38.73    6.27
   2 -10   1   28.41    5.07
   2  10   2  147.92   10.85
  -2 -10  -2  151.88    9.46
  -2 -10  -3   12.03    4.25
   2 -10   3   23.40    5.81
   2  10   3   17.62    5.77
   2 -10   3   25.20    5.85
  -2 -10  -4   31.73    5.53
   2 -10   4   44.61    6.33
   2  10   4   41.15    6.53
   2 -10   4   47.38    7.03
   2 -10   5    4.21    4.42
  -2 -10  -5    0.42    4.37
   2  10   5   -6.45    4.44
   2 -10   5   -4.63    4.74
  -2 -10  -6   35.06    5.91
  -2 -10  -6   18.96    5.17
   2  10   6   18.00    2.92
   2 -10   6   23.84    5.86
   2 -10   6   19.12    5.48
  -2 -10  -7    2.73    3.99
   2 -10   7    9.63    5.23
  -2 -10  -7    5.82    4.19
   2 -10   8   95.26    9.26
  -2 -10  -8   78.46    7.33
   2 -10   9    7.66    5.48
  -2 -10  -9    6.36    4.25
  -2 -10 -10   25.22    5.32
   2 -10  10   12.53    5.97
   2 -10  11   14.41    6.85
   2 -11 -10    2.93    3.62
  -2  11  10    1.59    8.45
  -2  11   9   24.04    9.27
   2 -11  -9   20.89    4.04
  -2  11   8    0.51    9.39
   2  11  -8   20.90    8.30
  -2  11   7   99.24   14.83
   2  11  -7  100.67   12.69
  -2  11   6    6.02   10.63
   2  11  -6   -4.98    8.12
  -2  11   5   10.60   11.01
   2  11  -5   18.56    8.45
  -2 -11   4    4.69    5.08
  -2  11   4    2.98   12.16
   2  11  -4   15.23    8.39
   2 -11  -4   10.99    5.49
   2 -11  -3   20.04    5.83
  -2 -11   3   22.75    5.84
   2  11  -3   18.94    7.68
   2 -11  -2    5.15    4.65
  -2 -11   2    2.71    5.35
   2  11  -2   15.55    6.86
   2  11  -1  110.85   11.33
  -2 -11   1   83.56    8.66
   2 -11  -1  116.72    9.51
  -2 -11   0    8.20    4.85
   2  11   0   12.84    7.04
  -2 -11  -1   28.38    5.96
   2 -11   1   33.51    6.57
   2  11   1   33.64    7.34
  -2 -11  -2    2.18    4.92
   2  11   2   -3.21    5.63
   2 -11   2   -1.77    4.61
   2 -11   3   30.51    6.16
  -2 -11  -3   21.23    5.97
   2  11   3   20.85    6.22
   2 -11   4   12.05    5.33
  -2 -11  -4    7.28    4.52
   2  11   4   14.11    5.54
  -2 -11  -5   69.55    7.52
   2  11   5   71.37    6.37
   2 -11   6   11.59    6.01
  -2 -11  -6    7.06    4.40
  -2 -11  -7   16.82    5.27
   2 -11   7   35.68    7.64
  -2 -11  -8    4.09    5.34
   2 -11   8    5.94    6.04
  -2 -11  -8    0.76    5.00
   2 -11   9   17.29    7.21
  -2 -11  -9    5.07    5.62
  -2 -11  -9    9.68    5.06
  -2 -11 -10    4.64    4.80
  -2 -11 -10   -2.63    4.77
   2  12  -8   17.70    9.00
  -2  12   7   21.38   11.52
   2  12  -7    7.23    8.44
  -2  12   6   29.29   13.12
   2  12  -6   12.08   10.03
  -2  12   5   -4.04   10.92
   2  12  -5    4.14    7.68
   2  12  -4   68.32   11.10
  -2  12   4   49.39   15.26
  -2 -12   3    3.11    3.72
   2  12  -3   18.85    8.29
  -2 -12   2   17.95    5.96
   2  12  -2   26.29    8.81
  -2 -12   1   -2.65    5.31
   2  12  -1    0.18    7.60
  -2 -12   0   18.67    6.07
   2  12   0    9.19    7.22
  -2 -12  -1   -1.74    5.55
   2  12   1   -3.56    6.31
   2  12   2   72.16    8.50
  -2 -12  -2   55.89    7.62
  -2 -12  -3   -0.27    5.69
   2  12   3   11.76    6.06
  -2 -12  -4   16.82    5.68
   2  12   4   19.79    5.51
   2 -12   5    4.69    6.36
  -2 -12  -5    5.82    5.38
   2  12   5   -4.32    2.79
   2 -12   6   14.65    6.42
   2 -12   7    2.40    5.89
   3   0 -19    9.94    4.72
   3   0 -18    0.48    4.29
   3   0 -17   62.02    6.20
   3   0 -16    1.88    3.93
  -3   0  15  356.50   13.64
   3   0 -15  400.85   12.96
   3   0 -14   -3.40    3.59
  -3   0  14    0.73    5.23
  -3   0  13   18.43    5.99
   3   0 -13   16.74    3.92
  -3   0  12    7.50    5.83
  -3   0  12   10.58    8.91
   3   0 -12   -3.32    3.13
  -3   0  11  114.34    9.66
   3   0 -11  106.44    6.13
  -3   0  10   -2.30    6.94
   3   0 -10    1.27    2.64
  -3   0  10   -1.90    4.73
   3   0 -10   -2.29    2.60
   3   0  -9 1805.98   24.72
  -3   0   9 1680.86   38.26
   3   0  -9 1730.30   20.00
  -3   0   9 1775.94   32.33
   3   0  -8   -2.52    2.65
   3   0  -8   -0.24    2.03
  -3   0   8   -0.24    3.96
  -3   0   8   -1.81    5.54
   3   0  -7  428.46   11.20
   3   0  -7  408.76    8.38
  -3   0   7  431.02   13.97
   3   0  -6    0.68    2.47
   3   0  -6   -0.27    1.88
  -3   0   6    1.68    3.04
   3   0  -6   -1.97    1.73
  -3   0   6    1.09    4.52
   3   0  -5  342.03    6.79
  -3   0   5  326.38   10.15
   3   0  -5  326.06    5.82
   3   0  -5  325.21    9.57
  -3   0   5  322.12   12.67
  -3   0   4   -0.39    3.51
   3   0  -4   -0.09    2.36
   3   0  -4   -0.09    1.09
  -3   0   4    0.30    1.92
   3   0  -4    0.24    0.90
   3   0  -4    0.50    1.11
   3   0  -3 3339.17   26.88
  -3   0   3 3208.36   20.34
   3   0  -3 3246.91   29.96
   3   0  -2    1.75    2.70
   3   0  -2    1.47    2.02
   3   0  -1   66.27    3.07
   3   0  -1   64.89    4.11
   3   0  -1   66.56    3.94
   3   0   0   -0.53    1.91
   3   0   0    1.36    1.43
   3   0   1   26.28    2.14
   3   0   1   15.76    2.21
   3   0   2    1.33    1.68
   3   0   2    0.15    1.01
   3   0   3 2656.21   21.37
   3   0   3 3146.64   10.07
   3   0   4   -1.58    3.01
   3   0   4    0.62    0.66
   3   0   4   -0.21    2.16
   3   0   5   55.53    2.18
   3   0   5   47.79    4.50
   3   0   6   -1.94    3.95
   3   0   6    1.26    1.30
   3   0   7   84.60    3.88
   3   0   7   38.58    8.18
   3   0   8    2.88    5.75
   3   0   8    1.34    2.07
   3   0   9 1732.06   19.92
   3   0   9 1269.18   34.32
   3   0  10    1.12    7.57
   3   0  11   29.42   11.12
   3   0  12   -8.91   10.87
   3   0  13   15.57   11.59
   3   0  14   15.60   14.01
   3   0  15  208.22   29.97
   3   0  16    6.70   18.30
   3   0  17    6.79   19.84
   3   0  18   40.98   26.41
   3  -1 -20   11.26    4.47
   3  -1 -19   -2.97    4.07
   3  -1 -18  114.58    8.07
   3   1 -18  130.62    8.95
   3   1 -17   -6.71    4.74
   3  -1 -17   -6.36    4.04
   3   1 -16   22.80    4.81
   3  -1 -16   26.42    4.67
  -3   1  16   21.26    5.21
  -3  -1  15   -1.36    4.95
  -3   1  15    1.12    5.74
   3   1 -15    4.65    4.03
   3  -1 -15    0.22    3.39
  -3   1  14  122.45   10.20
   3   1 -14  120.97    7.62
   3  -1 -14  132.14    7.53
  -3  -1  14  129.94    9.52
  -3   1  13    2.87    5.11
  -3  -1  13   -0.81    8.95
  -3  -1  13    4.23    5.48
   3  -1 -13    4.19    2.82
   3   1 -13   -2.78    3.19
  -3  -1  12  646.39   20.83
  -3   1  12  627.60   20.92
   3   1 -12  662.72   15.58
   3  -1 -12  664.68   14.34
  -3   1  12  704.53   33.30
  -3  -1  12  697.30   28.88
  -3  -1  11    9.85    7.55
  -3   1  11   -0.59    8.37
  -3  -1  11    0.50    4.74
  -3   1  11   -0.96    4.99
   3   1 -11    2.16    2.77
   3  -1 -11    0.92    2.68
   3   1 -10    6.98    2.54
   3   1 -10    5.71    3.03
   3  -1 -10    2.26    2.69
  -3   1  10   10.25    8.63
  -3  -1  10   10.70    5.62
  -3   1  10    7.60    4.85
   3  -1 -10   10.04    2.78
  -3  -1  10   -1.79    6.73
   3   1  -9   18.12    3.27
   3  -1  -9   17.02    3.41
   3   1  -9   10.05    3.21
   3  -1  -9   27.96    3.09
  -3   1   9   19.63    7.30
  -3  -1   9   24.10    7.00
  -3  -1   9   28.81    5.71
  -3   1   9   23.83    6.28
  -3  -1   8  229.38   12.87
  -3  -1   8  195.48   10.43
   3   1  -8  200.63    8.66
  -3   1   8  233.52   12.16
   3  -1  -8  185.76    7.77
   3   1  -8  210.68    7.23
   3  -1  -8  202.60    6.32
  -3   1   8  176.05   14.23
   3   1  -7    2.21    2.08
   3   1  -7    3.02    2.94
   3  -1  -7    1.42    2.13
  -3  -1   7    0.81    3.50
  -3   1   7    3.81    5.90
  -3   1   7    9.03    4.39
  -3  -1   7    1.11    4.06
   3  -1  -7   -0.71    1.64
   3   1  -6 3023.37   22.57
   3  -1  -6 3093.61   24.12
  -3  -1   6 3005.95   32.38
  -3   1   6 3088.78   35.03
   3  -1  -6 3086.87   28.01
   3  -1  -6 3048.05   19.03
  -3  -1   6 2930.10   37.12
   3   1  -6 3035.12   32.07
  -3   1   6 2884.62   43.37
   3   1  -5   21.76    2.04
   3   1  -5   22.08    3.45
  -3   1   5   23.74    4.11
   3  -1  -5   31.35    3.29
   3   1  -5   23.61    2.36
   3  -1  -5   29.39    2.39
   3  -1  -5   27.61    1.92
  -3   1   5   25.40    6.19
  -3  -1   5   23.03    3.61
  -3  -1   5   25.30    4.43
   3   1  -4   63.85    2.68
   3  -1  -4   68.48    1.98
   3   1  -4   68.54    5.03
  -3  -1   4   64.34    4.01
  -3   1   4   62.23    4.35
   3  -1  -4   64.76    4.06
   3  -1  -4   70.54    6.78
   3   1  -4   65.75    2.67
   3  -1  -4   70.45    1.77
   3   1  -4   67.42    2.63
  -3  -1   4   69.74    5.47
  -3   1   4   63.08    7.14
   3   1  -3    1.74    2.31
   3   1  -3    3.55    0.74
  -3  -1   3    3.09    1.56
   3   1  -3    4.55    2.68
  -3  -1   3    7.69    2.80
   3  -1  -3    3.93    1.95
   3   1  -3    3.41    0.73
   3  -1  -3    5.59    4.10
  -3   1   3    2.54    1.55
   3   1  -2   85.79    5.38
   3  -1  -2   68.55    3.70
   3  -1  -2   91.37    6.87
   3   1  -2   77.70    2.72
  -3  -1   2   76.07    2.86
   3   1  -2   91.55    4.70
   3  -1  -1  100.25    4.10
   3  -1  -1   93.16    4.12
   3  -1  -1  109.92    7.17
   3   1  -1  115.84    3.38
   3   1  -1  113.64    4.72
   3  -1   0 4394.80   26.75
   3   1   0 4392.68   24.64
   3   1   0 4438.78   21.70
   3  -1   0 4431.71   21.65
   3  -1   1    9.03    2.16
   3   1   1    5.46    1.38
   3  -1   1   11.43    1.44
   3   1   1    6.88    1.62
   3   1   2  195.78    4.11
   3  -1   2  210.54    6.89
   3   1   2  181.40    5.78
   3   1   3   -0.49    0.95
   3  -1   3    0.57    1.91
   3   1   3   -0.16    1.97
   3   1   4   79.99    2.74
   3  -1   4   84.94    4.78
   3   1   5   20.90   11.11
   3  -1   5   18.12    3.24
   3  -1   5   14.12    1.26
   3   1   5   22.44    1.82
   3  -1   5   12.93    1.44
   3  -1   6 2312.19   15.55
   3   1   6 2284.37   17.06
   3  -1   6 2262.50   18.35
   3  -1   6 2247.21   27.14
   3  -1   7    2.57    1.77
   3  -1   7    2.41    3.20
   3   1   7   -0.06    1.70
   3  -1   7    0.22    2.66
   3  -1   8  117.21    5.37
   3   1   8  137.34    5.66
   3  -1   8  129.78    7.96
   3   1   9    2.93   12.31
   3   1   9    6.55    2.76
   3  -1   9   -0.62    4.82
   3  -1   9    7.55    2.79
   3  -1  10   21.76    4.21
   3  -1  10   10.56    6.12
   3   1  10    0.09   13.89
   3   1  11    2.68   13.91
   3  -1  11    9.11    6.82
   3   1  12  586.47   43.27
   3  -1  12  561.04   26.44
   3   1  13   -3.30   15.58
   3  -1  13    0.72    7.96
   3   1  14  -10.52   17.39
   3  -1  14   22.84   12.56
   3   1  15   -5.55   23.09
   3  -1  15   -6.16   11.45
   3   1  16   25.18   27.04
   3  -1  16   32.80   14.98
   3  -1  17   19.31   15.03
   3   1  17  -16.41   23.58
   3  -1  18   65.35   25.24
   3   1  18   58.09   37.09
   3  -2 -20   -7.80    4.42
   3  -2 -19    7.80    4.34
   3  -2 -18    3.20    4.02
   3   2 -17   45.63    6.25
   3  -2 -17   43.21    5.51
   3   2 -16    4.20    3.88
  -3   2  16   -1.13    5.17
   3  -2 -16    5.34    3.29
  -3   2  15  334.75   15.29
   3   2 -15  325.59   12.76
   3  -2 -15  333.07   11.41
  -3  -2  14    7.06    4.92
  -3   2  14    6.40    5.47
   3   2 -14    2.14    3.44
   3  -2 -14    8.58    3.32
   3   2 -13   15.59    3.88
  -3  -2  13   20.82    5.87
  -3   2  13    9.69    5.97
   3  -2 -13   19.34    3.49
  -3  -2  13    7.55    8.44
   3   2 -12    4.46    3.62
   3  -2 -12    0.06    2.62
  -3  -2  12    3.87    6.78
  -3  -2  12    1.73    5.10
  -3   2  12    6.04    6.10
  -3  -2  11   95.99   11.07
  -3   2  11   78.83    8.55
   3   2 -11   99.99    6.85
   3  -2 -11   91.52    5.20
  -3  -2  11   93.75    8.69
   3   2 -10    4.89    3.27
   3  -2 -10    6.12    2.83
   3  -2 -10    5.47    2.49
  -3  -2  10    6.26    5.07
  -3   2  10    3.81    5.32
  -3  -2  10    5.65    5.60
  -3   2  10   -3.11    9.76
   3   2  -9 1112.17   21.37
  -3  -2   9 1081.82   23.95
  -3   2   9 1102.03   26.59
   3  -2  -9 1133.75   19.13
   3   2  -9 1188.47   19.49
   3  -2  -9 1122.84   14.94
  -3  -2   9 1130.02   27.33
   3  -2  -8   13.94    3.39
   3  -2  -8   19.46    2.62
   3   2  -8   16.01    4.13
  -3  -2   8   16.46    4.87
  -3   2   8   14.20    5.23
   3   2  -8   10.28    2.76
  -3   2   8    6.19    8.46
  -3  -2   8   17.45    4.90
  -3  -2   7   14.06    4.15
   3   2  -7    4.00    3.32
   3   2  -7   13.44    2.92
   3  -2  -7   10.94    2.02
   3  -2  -7   11.05    2.82
  -3   2   7   10.00    5.15
  -3  -2   7    9.54    4.38
   3  -2  -7   20.52    3.10
  -3   2   7   16.34    7.98
  -3   2   6   -0.90    7.90
   3  -2  -6    3.21    2.26
   3  -2  -6    4.37    2.17
  -3   2   6   -1.20    4.31
  -3  -2   6    4.82    2.88
  -3  -2   6    2.25    3.89
   3   2  -6    0.25    2.34
   3  -2  -6    1.83    1.41
   3   2  -6    0.96    2.90
  -3  -2   5  321.58    9.84
   3  -2  -5  336.71    8.84
   3   2  -5  330.89    7.81
  -3   2   5  327.25   11.68
   3  -2  -5  338.81    5.38
   3   2  -5  337.31    7.32
   3  -2  -5  341.02    6.71
  -3  -2   5  286.00   10.80
   3   2  -5  321.08   11.09
   3  -2  -4    2.19    5.23
   3   2  -4    4.36    1.33
   3  -2  -4    3.95    2.15
  -3  -2   4    4.03    2.06
  -3  -2   4    4.67    3.10
  -3   2   4    2.75    2.62
  -3   2   4   -1.55    7.82
   3   2  -4    5.27    1.73
   3   2  -4    5.98    2.83
   3   2  -3 3351.35   33.74
  -3  -2   3 3387.77   23.80
  -3   2   3 3430.57   26.61
   3  -2  -3 3376.32   24.72
   3   2  -3 3398.31   18.02
   3   2  -3 3458.22   15.86
  -3  -2   3 3455.09   32.67
   3   2  -2    2.13    0.96
   3   2  -2    4.70    2.17
   3  -2  -2    1.92    1.60
  -3  -2   2    2.55    2.37
  -3  -2   2    0.27    1.31
   3  -2  -1   35.55    2.42
  -3  -2   1   34.56    2.07
   3   2  -1   41.94    3.04
   3   2  -1   34.39    1.62
   3   2   0    5.58    1.74
   3   2   0    6.18    1.42
   3  -2   0    6.63    1.55
   3  -2   0    8.71    6.23
   3  -2   0    5.07    2.07
   3  -2   1  507.77    6.31
   3   2   1  473.79    7.82
   3  -2   1  493.97   10.08
   3  -2   2   13.52    1.20
   3   2   2    7.07    1.61
   3  -2   2   12.85    3.07
   3  -2   3 3393.02   28.34
   3  -2   3 3475.06   11.70
   3  -2   4   70.59    4.85
   3   2   4   60.99    3.14
   3  -2   4   65.38    1.80
   3  -2   4   66.08    2.83
   3   2   5  197.35    5.16
   3  -2   5  201.43    7.71
   3  -2   5  180.03    3.63
   3  -2   5  222.51    5.35
   3  -2   6   13.05    2.35
   3   2   6   15.53    2.22
   3  -2   6   12.46    1.78
   3   2   6   14.61   11.87
   3  -2   6   15.68    3.56
   3   2   7   52.93    3.63
   3  -2   7   38.81    4.13
   3  -2   7   55.56    3.49
   3  -2   7   48.88    5.32
   3   2   7   43.02   17.76
   3  -2   8    0.85    2.56
   3  -2   8    4.06    3.30
   3  -2   8    5.69    2.99
   3   2   8    4.50    2.14
   3  -2   9  833.86   17.04
   3  -2   9  823.84   16.51
   3   2   9  767.14   54.81
   3  -2  10    6.37    3.43
   3  -2  10    9.73    4.40
   3  -2  11   74.02    8.25
   3   2  11   28.31   26.55
   3   2  12   -0.94   22.95
   3  -2  12    3.26    6.47
   3  -2  13    5.66    8.70
   3   2  13   38.56   25.46
   3   2  14   14.59   24.60
   3  -2  14    0.39    8.45
   3  -2  15  193.94   20.62
   3   2  15  103.66   46.02
   3  -2  16   12.76    9.94
   3   2  16  -17.02   27.48
   3  -2  17    1.27   13.38
   3  -2  18  -27.96   16.28
   3  -3 -20   29.64    5.40
   3  -3 -19   -1.18    3.99
   3  -3 -18  116.17    8.12
   3  -3 -17   -2.13    3.75
   3  -3 -16   10.11    4.12
   3   3 -16   11.98    4.57
   3  -3 -15   -4.05    3.44
   3   3 -15   -5.62    4.88
  -3   3  15   -7.48    6.07
  -3   3  14   73.03    8.90
   3   3 -14   90.80    7.77
   3  -3 -14   81.08    6.06
  -3  -3  14   75.97    6.51
  -3  -3  13    9.45    5.46
  -3   3  13   -3.25    5.49
   3   3 -13    7.27    4.24
  -3  -3  13    3.63    7.07
   3  -3 -13    4.37    2.99
  -3  -3  12  643.60   19.97
  -3   3  12  577.26   21.27
   3   3 -12  636.28   16.67
   3  -3 -12  637.49   13.47
  -3  -3  12  571.54   22.81
   3   3 -11   12.00    4.00
   3  -3 -11   15.24    3.05
  -3  -3  11   14.36    6.15
  -3   3  11   12.69    6.15
  -3  -3  11    7.96    5.97
  -3  -3  10   33.19    6.73
   3  -3 -10   16.72    3.67
   3   3 -10   19.22    4.28
   3  -3 -10   20.13    2.90
  -3   3  10   24.59    6.84
  -3  -3  10    7.23    5.24
   3  -3  -9    0.77    1.88
   3   3  -9    1.19    3.54
   3   3  -9    7.94    3.72
  -3   3   9    0.34   14.01
   3  -3  -9   -0.08    2.48
  -3  -3   9   -3.77    4.67
  -3   3   9    3.53    5.55
  -3  -3   9   -0.10    4.64
  -3  -3   8  261.71   11.87
  -3   3   8  285.46   14.52
   3  -3  -8  264.75    9.12
   3   3  -8  288.87   10.26
   3  -3  -8  256.60    6.77
  -3  -3   8  240.43   12.00
   3   3  -8  272.45   11.79
   3   3  -7   14.14    4.29
   3  -3  -7   18.28    3.49
   3  -3  -7   23.06    3.43
   3  -3  -7   15.78    2.20
  -3  -3   7   24.44    4.59
  -3  -3   7   15.58    4.76
  -3   3   7   12.46    4.97
  -3   3   7   31.48   12.06
   3   3  -7   19.66    3.56
   3   3  -6 2297.64   31.74
   3  -3  -6 2505.57   23.16
  -3   3   6 2508.06   36.92
  -3  -3   6 2493.79   30.44
   3  -3  -6 2373.84   25.12
   3  -3  -6 2520.20   17.25
   3   3  -6 2436.95   26.24
  -3  -3   6 2551.43   34.06
   3   3  -5   44.45    5.35
  -3  -3   5   54.36    4.89
   3  -3  -5   66.68    4.50
   3  -3  -5   56.66    3.11
   3   3  -5   42.06    3.91
   3  -3  -5   64.91    2.68
  -3   3   5   61.97   11.73
  -3  -3   5   49.99    5.06
  -3   3   5   71.64    7.32
  -3  -3   4   37.88    3.72
  -3   3   4   43.61    5.21
   3  -3  -4   31.28    3.17
   3   3  -4   34.80    2.51
  -3   3   4   18.00    8.88
  -3  -3   4   35.30    4.46
   3   3  -4   33.10    3.40
   3   3  -4   30.70    5.10
   3   3  -3   10.32    2.30
  -3  -3   3    9.16    3.02
   3   3  -3   11.23    1.62
  -3  -3   3    6.74    2.21
   3  -3  -3    9.30    2.10
  -3   3   3   13.50    3.61
   3   3  -3   10.16    4.21
   3  -3  -3   12.20    6.69
  -3  -3   2  259.23    6.90
   3  -3  -2  277.42    6.94
   3   3  -2  264.04    5.74
   3   3  -2  267.39    4.68
  -3  -3   2  283.26    9.12
   3  -3  -1   18.74    2.23
   3   3  -1   22.72    1.14
   3   3  -1   22.51    1.06
  -3  -3   1   24.05    2.15
   3   3  -1   30.81    3.13
  -3  -3   1   25.15    3.17
   3  -3  -1   11.25    9.03
   3  -3   0 2407.46   41.32
   3  -3   0 2499.61   17.85
  -3  -3   0 2399.03   17.02
   3  -3   0 2439.59   23.99
   3   3   0 2516.92   20.67
   3  -3   1   76.15    3.22
   3  -3   1   70.81    4.55
  -3  -3  -1   69.15    2.93
   3   3   1   57.31    3.38
   3  -3   2   31.01    3.52
   3  -3   2   37.67    2.30
   3   3   2   30.72    2.79
   3   3   3    4.21    1.88
   3  -3   3    1.56    1.21
   3  -3   3   -1.24    2.35
   3   3   4  131.42    4.98
   3  -3   4  140.64    6.59
   3  -3   4  135.48    3.69
   3  -3   5   14.70    1.67
   3  -3   5   17.99    3.60
   3   3   5   22.32    2.46
   3  -3   6 1386.00   13.08
   3  -3   6 1322.09   20.17
   3  -3   7   14.93    3.74
   3  -3   7   21.34    2.54
   3  -3   7   20.61    4.29
   3  -3   8   96.66    7.23
   3  -3   8   92.96    4.99
   3  -3   8   80.50    6.71
   3  -3   9    3.33    3.79
   3  -3   9    5.05    3.95
   3  -3   9    3.95    3.36
   3   3   9    9.94   18.11
   3   3  10   27.67   20.25
   3  -3  10   33.49    4.70
   3   3  11   14.55   21.11
   3  -3  11    8.64    4.56
   3   3  12  276.74   46.18
   3  -3  12  418.17   16.14
   3  -3  13    5.43    6.57
   3   3  13   42.43   22.65
   3  -3  14   29.47    8.81
   3   3  14   33.64   26.49
   3  -3  15   -0.51    8.31
   3   3  15   -7.13   21.78
   3   3  16   43.22   28.78
   3  -3  16    6.45    9.31
   3  -3  17   14.00   11.33
   3  -4 -19    4.14    4.44
   3  -4 -18   -2.91    3.75
  -3   4  17   15.20    3.06
   3  -4 -17   56.25    5.80
  -3   4  16   -1.31    5.80
   3  -4 -16    2.55    3.42
   3   4 -16    6.34    4.76
  -3   4  15  179.93   11.22
   3   4 -15  190.53   11.07
   3  -4 -15  199.90    8.72
   3   4 -14    4.18    3.70
  -3   4  14   10.31    6.62
   3  -4 -14    5.95    2.96
   3   4 -13   13.54    4.71
  -3  -4  13   14.82    5.34
  -3   4  13   14.53    6.95
   3  -4 -13   14.32    3.35
   3   4 -12    3.04    3.81
  -3  -4  12    3.03    6.05
  -3   4  12   -9.64    5.69
  -3  -4  12    1.71    6.52
   3  -4 -12   -0.52    2.58
  -3  -4  11  116.11    9.87
   3   4 -11   93.97    7.82
   3  -4 -11   92.18    5.29
  -3  -4  11   95.22    9.99
  -3   4  11  114.99   11.06
   3   4 -10   30.97    5.53
   3  -4 -10   26.50    4.04
   3  -4 -10   26.57    3.13
  -3  -4  10   27.59    5.99
  -3  -4  10   17.60    5.60
  -3   4  10   17.96    6.48
  -3   4   9  923.93   27.17
   3  -4  -9  911.09   17.63
   3   4  -9  996.71   20.76
   3  -4  -9  939.90   13.87
  -3  -4   9  908.48   22.73
  -3  -4   9  895.33   24.48
   3  -4  -8   13.25    3.37
   3  -4  -8    9.42    2.36
  -3  -4   8    5.62    4.70
   3   4  -8    3.39    3.72
  -3  -4   8    8.10    4.15
  -3   4   8   13.30    5.72
   3   4  -8    8.69    3.71
  -3  -4   7  101.75    7.96
  -3   4   7   75.98    8.78
   3  -4  -7  104.31    5.88
   3  -4  -7  101.99    4.31
  -3  -4   7  105.52    8.22
   3   4  -7  100.67    6.82
   3   4  -7  100.93    7.85
   3   4  -6    1.00    3.86
  -3  -4   6    0.58    3.68
   3  -4  -6   -1.81    2.62
  -3  -4   6   -4.53    3.72
   3  -4  -6    1.43    2.34
  -3   4   6    6.64    5.52
  -3   4   6    0.15   10.24
   3   4  -6    2.64    3.07
   3  -4  -6    1.81    1.63
   3  -4  -5  286.47    5.32
   3   4  -5  268.89   12.25
   3  -4  -5  281.37    5.17
   3  -4  -5  272.20    6.28
  -3   4   5  305.37   14.19
   3  -4  -5  269.45    8.56
   3   4  -5  264.99    9.45
  -3  -4   5  257.19    9.90
  -3  -4   5  253.74   10.46
  -3  -4   4   21.72    3.51
   3  -4  -4   24.56    3.13
   3   4  -4   28.27    3.92
  -3   4   4   19.08    5.23
  -3  -4   4   25.16    4.13
   3   4  -4   31.46    5.64
   3  -4  -3 2025.01   20.91
   3   4  -3 2058.31   22.75
  -3  -4   3 2078.12   22.88
   3   4  -3 2059.57   16.54
  -3  -4   3 1979.58   25.37
  -3  -4   2   53.53    3.86
   3  -4  -2   66.04    4.04
   3   4  -2   47.02    3.68
   3   4  -2   54.74    2.81
  -3  -4   2   53.14    5.11
   3  -4  -2   62.55   11.72
  -3  -4   1   25.26    2.88
   3   4  -1   28.36    2.79
   3  -4  -1   27.61    2.88
   3   4  -1   27.08    2.00
  -3  -4   1   32.30    2.97
  -3  -4   1   20.74    3.36
  -3  -4   0    0.82    2.60
   3   4   0    2.57    0.94
   3  -4   0    4.64    1.86
   3   4   0    2.45    1.30
  -3  -4   0    0.28    1.60
   3  -4   0    1.54    7.34
   3  -4   0    3.63    2.44
   3  -4   1   56.67    3.38
   3  -4   1   43.51    4.42
  -3  -4  -1   39.51    2.87
   3   4   1   53.71    3.75
   3  -4   2   74.78    3.62
  -3  -4  -2   76.61    3.64
   3   4   2   81.74    4.43
   3  -4   2   66.63    4.99
   3   4   3 1843.17   20.31
  -3  -4  -3 1859.74   16.83
   3  -4   3 2031.28   16.80
   3  -4   3 2127.01   26.00
   3  -4   4   12.24    2.00
   3   4   4    8.51    2.25
   3  -4   4    4.08    3.00
   3  -4   5   98.30    4.08
   3  -4   5   90.49    6.32
   3  -4   6    1.40    1.87
   3  -4   6    1.31    3.18
   3  -4   7   86.24    4.37
   3  -4   7   74.55    6.05
   3  -4   8   12.60    2.91
   3  -4   8   16.91    4.52
   3  -4   9  754.01   19.53
   3  -4   9  756.78   14.81
   3  -4  10   12.18    3.75
   3  -4  11   63.54    6.36
   3  -4  12   -3.45    4.25
   3   4  13   23.88   26.12
   3  -4  13   13.58    5.59
   3   4  14   54.05   31.79
   3  -4  14    3.47    6.08
   3   4  15   -8.57   29.33
   3  -4  15  139.88   14.17
   3  -4  16   -0.12    9.14
   3  -4  17   15.98   10.41
   3  -5 -18   71.90    6.86
  -3   5  17   -0.40    3.44
   3  -5 -17    3.37    3.84
  -3   5  16   13.07    6.61
   3  -5 -16   13.05    4.17
   3   5 -15    2.36    4.87
  -3   5  15   -1.19    6.73
   3  -5 -15   -4.78    3.96
  -3   5  14   69.57    8.47
   3  -5 -14   95.29    6.37
   3   5 -14   80.62    8.07
  -3  -5  13    0.32    2.81
  -3  -5  13    1.31    2.26
  -3   5  13    9.17    6.31
   3   5 -13    3.38    4.69
   3  -5 -13   -3.15    2.97
  -3  -5  12  287.20   12.64
  -3   5  12  259.23   15.56
   3   5 -12  298.71   13.48
   3  -5 -12  278.62    9.29
   3   5 -11    1.78    4.06
  -3  -5  11    5.02    6.01
  -3   5  11   11.21    6.26
   3  -5 -11    7.83    2.73
  -3  -5  10   14.08    5.94
  -3  -5  10    2.04    5.39
  -3   5  10   16.05    6.61
   3   5 -10    4.93    4.22
   3  -5 -10   11.99    2.74
  -3  -5   9    4.89    5.30
  -3  -5   9    8.13    5.04
   3  -5  -9    4.50    3.23
  -3   5   9    3.64    6.71
   3   5  -9   -1.38    4.07
   3  -5  -9    5.81    2.35
  -3  -5   8   79.62    7.69
  -3   5   8   81.79    9.81
   3  -5  -8   88.18    6.24
   3  -5  -8   94.64    4.58
   3   5  -8   81.87    7.19
  -3  -5   8   67.65    7.33
   3   5  -7   23.48    4.74
   3  -5  -7   18.81    2.62
  -3  -5   7   23.42    5.02
  -3   5   7   21.30    7.31
   3  -5  -7   23.32    3.77
  -3  -5   7   24.54    5.04
   3   5  -6 1098.30   25.56
  -3  -5   6 1154.33   23.01
   3  -5  -6 1134.40   16.41
   3   5  -6 1082.04   21.33
   3  -5  -6 1156.12   19.11
   3  -5  -6 1155.34   12.54
  -3  -5   6 1102.86   23.21
   3   5  -5   56.24    7.61
   3  -5  -5   76.75    2.81
   3  -5  -5   73.28    3.41
  -3  -5   5   79.71    6.42
   3   5  -5   67.29    6.33
   3  -5  -5   73.55    5.09
  -3  -5   5   69.83    6.36
   3  -5  -4  116.01    5.94
  -3  -5   4  124.59    7.31
  -3   5   4  142.91   11.24
   3   5  -4  111.36    7.04
  -3  -5   4  114.24    7.30
   3   5  -4  149.01   11.18
  -3  -5   3    2.28    3.15
  -3  -5   3    3.19    2.88
  -3   5   3    4.80    5.36
   3  -5  -3   -0.21    2.39
   3   5  -3   -1.35    3.08
   3   5  -2   77.80    5.57
   3  -5  -2   87.76    5.20
   3   5  -2   73.71    3.55
  -3  -5   2   61.19    5.62
  -3   5   2   97.43    8.95
  -3  -5   2   80.25    5.16
  -3  -5   1  108.14    5.79
   3  -5  -1  134.14   13.04
   3  -5  -1  108.31    5.45
   3   5  -1  121.89    4.20
   3   5  -1  116.45    6.04
  -3  -5   1  121.51    6.93
   3   5   0 1663.06   17.88
   3  -5   0 1644.72   18.73
   3   5   0 1601.58   13.38
  -3  -5   0 1610.94   19.08
   3  -5   0 1568.37   22.73
   3   5   1   60.48    3.00
   3  -5   1   84.77    6.05
   3   5   1   57.35    2.34
   3  -5   1   84.34    4.64
  -3  -5  -1   56.31    3.95
   3  -5   2  191.16    6.53
  -3  -5  -2  164.05    6.06
   3  -5   2  176.22    8.28
  -3  -5  -3   13.51    2.52
   3  -5   3   15.01    2.68
   3  -5   3   18.48    4.17
   3  -5   4  133.82    5.42
   3  -5   4  151.85    8.33
   3  -5   5   43.68    3.40
   3  -5   5   40.12    5.03
   3  -5   6 1101.30   15.27
   3  -5   6 1122.81   21.51
   3  -5   7   18.04    2.87
   3  -5   7   12.24    3.73
   3  -5   8   50.39    4.54
   3  -5   8   37.71    5.42
   3  -5   9    0.88    2.57
   3  -5   9   -0.73    3.91
   3  -5  10   14.87    4.81
   3  -5  10   13.62    3.93
   3  -5  11    2.55    3.60
   3  -5  12  311.16   13.87
   3  -5  13   10.42    5.22
   3  -5  14   27.65    6.70
   3  -5  15   -3.54    6.70
   3  -5  16    9.27    7.61
  -3   6  17   13.29    3.93
   3  -6 -17   20.30    4.62
  -3   6  16    0.53    6.66
   3  -6 -16   10.10    4.00
  -3   6  15   98.30   10.96
   3   6 -15  116.82   10.36
   3  -6 -15  121.53    7.58
   3   6 -14    5.00    4.88
  -3   6  14    7.83    7.23
   3  -6 -14    8.77    3.32
   3   6 -13   15.20    5.33
   3  -6 -13   21.21    3.85
  -3   6  13   11.03    6.14
  -3  -6  12    2.26    4.80
  -3   6  12   12.15    7.96
   3   6 -12    6.45    5.27
   3  -6 -12   -1.05    2.97
  -3  -6  11  107.52    8.86
  -3   6  11   80.09   10.92
   3   6 -11   80.79    8.55
   3  -6 -11   77.64    5.11
  -3  -6  10   11.77    6.18
   3  -6 -10    2.10    2.45
  -3   6  10    0.79    6.25
   3   6 -10   11.35    5.35
  -3  -6   9  446.44   16.82
   3   6  -9  439.74   16.01
   3  -6  -9  414.27    9.81
  -3  -6   8   32.35    6.34
  -3   6   8   42.05    8.59
   3  -6  -8   36.05    4.65
   3  -6  -8   36.97    3.55
   3   6  -8   21.44    5.40
   3   6  -7   30.61    5.69
   3  -6  -7   22.07    4.23
   3  -6  -7   24.50    2.91
  -3  -6   7   20.97    5.40
  -3   6   7   32.84    8.51
   3  -6  -6    2.80    1.99
   3  -6  -6    0.29    2.47
  -3  -6   6   -1.31    4.77
  -3   6   6    4.20    6.78
   3  -6  -6    1.82    2.99
   3   6  -6   -1.03    3.74
   3   6  -5  142.56   10.88
   3   6  -5  150.26    9.14
   3  -6  -5  158.85    7.79
  -3  -6   5  160.51    9.40
   3   6  -4   49.77    5.85
   3  -6  -4   38.19    4.56
  -3   6   4   32.17    8.59
  -3  -6   4   40.61    5.09
  -3  -6   3 1126.59   20.66
   3   6  -3 1133.98   21.49
   3  -6  -3 1208.72   19.53
   3  -6  -2   19.58    3.46
  -3  -6   2   11.58    3.32
   3   6  -2    9.56    3.75
  -3  -6   1   58.98    4.97
   3   6  -1   60.01    5.37
   3  -6  -1   70.09    5.08
   3  -6  -1   74.26    6.16
  -3  -6   0    5.08    3.02
   3  -6   0    2.26    2.55
   3   6   0    0.69    3.31
  -3  -6   0   -0.07    2.98
   3  -6   0   -0.12    3.22
   3   6   1   72.76    4.56
   3   6   1   69.14    3.45
   3  -6   1   71.42    4.83
  -3  -6  -1   57.28    4.55
   3  -6   1   67.58    5.76
   3   6   2   11.86    2.23
   3   6   2    8.29    1.57
   3  -6   2    4.50    2.73
   3  -6   2    7.47    3.44
  -3  -6  -2   10.56    2.66
  -3  -6  -3 1067.96   17.09
   3  -6   3 1151.98   17.22
   3  -6   4  104.14    5.49
   3  -6   4  100.42    7.31
   3  -6   5  128.84    7.98
   3  -6   5  141.04    6.33
   3  -6   6    3.42    3.66
   3  -6   6    8.77    2.97
   3  -6   7   18.33    3.35
   3  -6   7   17.54    4.00
   3  -6   8   17.09    3.82
   3  -6   8   18.68    4.50
   3  -6   9  295.89   10.74
   3  -6   9  273.92   12.62
   3  -6  10   23.27    4.54
   3  -6  10   17.41    5.62
   3  -6  11   59.12    6.24
   3  -6  12    1.04    4.67
   3  -6  13    2.58    5.39
   3  -6  14    9.09    6.47
   3  -6  15   77.86    9.33
   3  -7 -16    7.38    3.82
  -3   7  16   10.75    6.41
   3  -7 -15   -1.19    3.40
   3  -7 -14   24.27    4.18
  -3   7  14   26.06    8.23
   3   7 -14   25.98    6.57
   3  -7 -13    5.91    3.34
  -3   7  13    9.45    8.11
   3   7 -13   -4.93    5.54
  -3   7  12  152.32   13.04
   3   7 -12  179.23   12.27
   3  -7 -12  186.15    8.15
   3  -7 -11   15.49    3.50
  -3  -7  11   17.24    4.95
  -3   7  11   19.13    8.13
   3   7 -11   15.61    6.14
  -3  -7  10   30.53    7.05
   3   7 -10   39.20    6.73
   3  -7 -10   33.88    3.87
  -3   7  10   32.39    9.41
  -3  -7   9   -0.45    5.63
  -3   7   9   12.09    7.86
   3   7  -9   -0.32    4.90
   3  -7  -9    0.01    2.61
   3  -7  -8   96.93    5.45
  -3  -7   8   83.22    8.69
  -3   7   8  105.07   12.08
   3   7  -8   90.11    8.93
   3  -7  -8   95.53    5.24
   3  -7  -7   22.03    3.20
   3  -7  -7   21.90    4.76
  -3   7   7   18.97    8.58
   3   7  -7   19.13    5.85
  -3  -7   7   26.63    6.34
   3  -7  -6  495.11    7.23
   3  -7  -6  489.84    8.32
  -3  -7   6  530.53   17.73
  -3   7   6  542.93   22.95
   3   7  -6  557.97   17.90
   3  -7  -6  558.75   15.17
  -3   7   5   47.07    9.26
   3  -7  -5   38.48    4.86
   3   7  -5   25.18    5.68
  -3  -7   5   42.67    6.18
  -3  -7   4   55.86    6.33
   3  -7  -4   57.01    5.36
   3   7  -4   50.39    6.51
  -3  -7   3    5.63    3.45
   3  -7  -3    4.97    2.99
   3   7  -3    0.37    4.26
  -3  -7   2  130.26    7.95
   3   7  -2  123.39    7.98
   3  -7  -2  131.83    7.50
  -3  -7   1   29.04    4.79
   3  -7  -1   23.06    4.74
   3   7  -1   24.26    4.75
   3  -7  -1   20.36    3.94
  -3  -7   0  544.24   14.49
   3   7   0  545.46   14.38
   3  -7   0  598.85   14.38
   3  -7   0  576.33   16.15
  -3  -7  -1   52.72    5.43
   3   7   1   36.74    4.64
   3  -7   1   45.60    4.86
  -3  -7  -1   43.46    5.00
   3  -7   1   43.04    5.41
   3   7   2   45.63    3.94
   3  -7   2   50.24    4.71
  -3  -7  -2   45.57    4.78
   3  -7   2   43.09    5.70
  -3  -7  -3   11.11    3.23
   3  -7   3    4.81    2.91
   3  -7   3    2.65    3.80
   3  -7   4   81.31    7.67
  -3  -7  -4   74.42    5.78
   3  -7   4   81.64    5.80
   3  -7   5   20.31    4.89
   3  -7   5   16.87    3.60
   3  -7   6  429.19   12.19
   3  -7   6  462.67   15.35
   3  -7   7   28.66    4.29
   3  -7   7   38.80    5.81
   3  -7   8   60.73    6.64
   3  -7   8   68.66    5.83
   3  -7   9   -2.99    4.48
   3  -7   9    1.24    3.75
   3  -7  10   20.18    4.60
   3  -7  10   34.50    6.43
   3  -7  11    4.23    4.09
   3  -7  12  145.30    9.97
   3  -7  13   12.67    5.69
   3  -7  14   32.08    7.76
  -3   8  15   49.39    8.95
   3  -8 -15   67.47    5.96
   3  -8 -14   -1.58    3.45
  -3   8  14    4.97    7.12
   3   8 -14   10.93    6.78
  -3   8  13    7.88    7.74
   3   8 -13   18.59    6.99
   3  -8 -13    7.33    3.50
   3   8 -12   -6.79    5.55
   3  -8 -12   -0.38    3.05
  -3   8  11   57.88   10.67
   3  -8 -11   45.47    4.71
   3   8 -11   30.62    6.09
   3  -8 -10    9.51    3.39
  -3  -8  10   13.93    5.81
  -3   8  10   14.14    6.93
   3   8 -10    5.97    5.31
   3  -8 -10   12.24    3.42
   3  -8  -9  194.25    7.32
  -3   8   9  192.48   15.47
   3   8  -9  200.13   12.78
  -3  -8   9  207.90   12.11
   3  -8  -8   17.18    2.91
  -3  -8   8   19.64    6.77
  -3   8   8    6.19    8.85
   3   8  -8   11.89    5.86
   3  -8  -7   20.99    2.48
  -3  -8   7   23.43    5.91
  -3   8   7   19.29   10.34
   3   8  -7   21.48    5.74
  -3  -8   6   -1.64    5.73
  -3   8   6    6.34    9.05
   3  -8  -6    0.34    3.90
   3   8  -6    8.99    5.32
  -3  -8   5   91.70    7.94
   3   8  -5  101.61    9.07
   3  -8  -5  116.19    8.09
  -3  -8   4   18.57    4.60
   3   8  -4    9.99    5.27
   3  -8  -4    6.54    3.94
  -3  -8   3  433.25   15.03
   3   8  -3  428.30   15.77
  -3  -8   2   81.73    7.19
   3  -8  -2  115.09    8.48
   3   8  -2   77.69    7.12
   3  -8  -2  102.12    7.32
  -3  -8   1   44.24    5.95
   3   8  -1   35.13    5.61
   3  -8  -1   39.25    5.08
   3  -8  -1   30.16    5.22
   3  -8   0    0.96    3.22
   3  -8   0   -1.19    3.97
  -3  -8   0    1.42    3.29
   3   8   0    3.99    4.30
   3   8   1   59.18    6.18
   3  -8   1   58.48    5.56
  -3  -8  -1   63.50    6.24
   3  -8   1   50.22    5.71
   3   8   2   57.67    5.05
  -3  -8  -2   62.74    6.97
   3  -8   2   50.15    5.46
  -3  -8  -2   52.39    6.34
   3  -8   2   47.06    6.29
  -3  -8  -3  407.56   13.40
   3   8   3  389.48    7.85
   3   8   3  370.34    6.64
   3  -8   3  437.44   13.25
  -3  -8  -3  387.11   12.72
   3  -8   4   22.10    4.23
   3  -8   4   20.37    5.38
  -3  -8  -4    8.86    3.44
   3  -8   5   92.04    6.95
   3  -8   5   75.04    7.36
   3  -8   6   -1.22    3.48
   3  -8   6    4.83    4.49
   3  -8   7   47.08    5.54
   3  -8   7   33.74    5.84
   3  -8   8   10.39    4.31
   3  -8   8    4.51    4.30
   3  -8   9  146.29    9.33
   3  -8   9  162.94   11.09
   3  -8  10    4.40    5.16
   3  -8  10    1.19    4.21
   3  -8  11   38.85    6.60
   3  -8  12   10.99    6.22
   3  -8  13    8.73    5.89
   3  -9 -14   25.06    4.66
   3   9 -14   34.99    8.26
  -3   9  14   35.42    9.37
   3  -9 -14   21.24    4.43
   3  -9 -13    3.13    4.20
  -3   9  13   13.44    8.00
   3   9 -13    9.17    6.80
   3  -9 -13   11.51    4.21
   3  -9 -12   75.16    5.93
   3   9 -12   79.32   10.11
   3  -9 -11   12.20    3.61
  -3   9  11   13.60    8.05
   3   9 -11    4.17    6.24
   3  -9 -10    6.68    3.32
  -3   9  10   11.13    7.89
   3   9 -10   -3.47    5.93
   3  -9  -9   -2.55    3.03
  -3  -9   9    0.65    5.17
  -3   9   9    1.24    8.41
   3   9  -9   -4.35    5.32
  -3  -9   8   45.15    7.54
  -3   9   8   65.33   12.24
   3   9  -8   51.38    8.22
  -3  -9   7    2.90    6.07
  -3   9   7   18.84    8.59
   3   9  -7   17.22    6.90
  -3  -9   6  221.54   12.83
  -3   9   6  263.87   20.03
   3   9  -6  227.07   13.45
   3  -9  -5   30.07    5.36
  -3  -9   5   11.20    5.90
   3   9  -5   17.13    6.50
  -3  -9   4   47.64    6.57
   3   9  -4   49.13    7.13
   3  -9  -4   50.04    6.32
   3  -9  -3    4.29    5.08
  -3  -9   3    0.77    4.38
   3   9  -3   -5.28    5.27
   3  -9  -3    4.90    4.38
  -3  -9   2   56.63    7.23
   3   9  -2   47.38    7.20
   3  -9  -2   60.82    6.63
   3  -9  -2   61.81    6.97
   3  -9  -1   20.00    5.22
   3  -9  -1   34.79    5.56
  -3  -9   1   17.27    5.05
   3   9  -1   23.08    5.52
   3   9   0  240.58   11.16
   3  -9   0  288.13   13.00
   3  -9   0  310.11   12.86
  -3  -9   0  238.62   11.62
  -3  -9  -1   21.60    5.19
   3   9   1   35.35    5.85
   3  -9   1   40.70    6.15
   3  -9   1   41.87    5.76
  -3  -9  -2   44.44    5.59
   3   9   2   56.79    5.64
   3  -9   2   68.57    6.83
   3  -9   2   55.40    7.13
  -3  -9  -3    4.74    4.01
   3  -9   3    8.60    4.27
   3   9   3    2.67    3.06
   3  -9   3    3.43    4.52
  -3  -9  -4   46.19    6.06
  -3  -9  -4   57.49    6.37
   3  -9   4   55.13    7.21
   3  -9   4   61.29    6.46
   3  -9   5   16.10    4.80
   3  -9   5    4.21    4.60
  -3  -9  -5    7.48    3.92
   3  -9   6  196.97   10.27
   3  -9   6  192.76   11.62
   3  -9   7   16.79    4.86
   3  -9   7   22.96    5.58
   3  -9   8   27.61    5.68
   3  -9   8   26.95    6.20
   3  -9   9   -0.25    4.56
   3  -9   9    5.21    5.48
   3  -9  10   10.91    5.17
   3  -9  10   17.15    5.91
   3  -9  11    0.55    5.39
   3  -9  12   48.21    7.91
   3  10 -13   -1.18    7.08
   3 -10 -12   -0.29    3.16
  -3  10  12    4.95    8.54
   3  10 -12    7.03    7.24
   3 -10 -11   13.20    2.30
  -3  10  11   -0.96    9.20
  -3  10  10   14.62    9.47
   3  10 -10   13.51    7.31
  -3  10   9  122.06   16.68
   3  10  -9   88.53   10.61
  -3 -10   8   10.17    5.42
  -3  10   8   13.29   12.61
   3  10  -8   11.15    5.99
  -3 -10   7   19.38    6.39
  -3  10   7    9.10   11.58
   3  10  -7   16.69    7.09
  -3 -10   6   -6.16    5.62
  -3  10   6   12.54   12.34
   3  10  -6    0.32    5.85
   3  10  -5   45.41    7.73
  -3 -10   5   43.57    7.28
   3 -10  -4   22.18    5.71
  -3 -10   4   10.59    5.41
   3  10  -4   11.71    6.17
  -3 -10   3  167.41   11.23
   3 -10  -3  180.36   11.37
   3  10  -3  145.83   11.17
   3 -10  -3  176.59   10.71
  -3 -10   2   10.70    5.08
   3  10  -2    1.73    5.04
   3 -10  -2   10.18    4.57
   3 -10  -2    9.69    5.24
   3 -10  -1   34.09    6.44
   3 -10  -1   33.71    5.99
  -3 -10   1   25.03    5.91
   3  10  -1   23.59    5.81
   3 -10   0    3.31    4.57
  -3 -10   0   -1.23    4.32
   3  10   0    7.16    4.83
   3 -10   0    1.38    4.70
  -3 -10  -1   31.66    5.98
   3  10   1   25.89    5.84
   3 -10   1   35.73    5.89
   3 -10   1   33.10    6.27
  -3 -10  -2   16.87    5.06
   3  10   2    7.76    3.84
   3 -10   2    2.55    5.77
   3 -10   2   13.46    4.81
   3 -10   3  171.98   11.86
   3 -10   3  192.66   11.08
   3 -10   4   19.59    6.18
  -3 -10  -4    9.06    4.67
   3 -10   4   21.59    5.27
  -3 -10  -5   52.32    7.57
   3 -10   5   35.83    6.27
   3 -10   5   39.62    6.75
   3 -10   6    6.39    4.54
  -3 -10  -6   -0.71    4.20
   3 -10   6   -9.85    6.30
  -3 -10  -6    1.12    4.11
   3 -10   7   27.07    6.05
   3 -10   7   23.23    6.08
   3 -10   8    6.84    5.24
   3 -10   8    7.27    5.77
   3 -10   9   60.51    8.57
   3 -10   9   56.68    8.19
   3 -10  10   17.06    6.60
  -3  11  10   24.87   10.47
   3  11 -10   24.16    9.06
  -3  11   9   37.53   12.57
   3  11  -9   -1.28    6.90
  -3  11   8   31.38   12.30
   3  11  -8   36.96    8.95
  -3  11   7   20.19   13.39
   3  11  -7   -1.92    7.06
  -3 -11   6   51.82    7.86
   3  11  -6   87.89   10.74
  -3  11   6   76.39   15.24
   3 -11  -5    1.34    5.36
  -3 -11   5   11.03    6.13
   3  11  -5    5.02    6.33
   3 -11  -4   11.87    5.52
  -3 -11   4   19.18    6.36
   3  11  -4   16.62    6.89
  -3 -11   3   -1.45    5.25
   3 -11  -3    0.69    5.04
   3  11  -3   -6.91    6.00
   3  11  -2   33.90    7.43
   3 -11  -2   33.47    6.94
  -3 -11   2   27.54    6.87
  -3 -11   1    2.12    4.84
   3  11  -1    8.79    6.13
   3 -11  -1    1.28    4.80
   3 -11  -1    2.99    5.30
  -3 -11   0   91.83    9.22
   3  11   0   79.65    7.97
   3 -11   0   88.28    8.68
   3 -11   1    5.33    6.17
  -3 -11  -1    4.20    5.29
   3  11   1    2.03    4.71
   3 -11   1    5.55    4.93
  -3 -11  -2   24.33    6.22
   3 -11   2   24.81    6.52
   3  11   2   24.58    4.51
   3 -11   2   23.76    6.73
  -3 -11  -3    1.93    5.25
   3 -11   3   -1.32    5.01
   3 -11   3    1.84    4.94
  -3 -11  -4   22.55    6.39
   3 -11   4   19.59    6.66
   3 -11   4   28.43    7.01
   3 -11   5    3.75    5.71
  -3 -11  -5    7.72    4.44
   3 -11   5    5.21    5.68
  -3 -11  -6   67.39    7.85
   3 -11   6   61.34    8.45
   3 -11   7    0.56    5.13
  -3 -11  -7    0.74    5.22
  -3 -11  -8   31.86    6.64
  -3 -11  -8   15.45    5.94
   3 -11   8   34.15    8.21
  -3  12   7   11.65   14.02
   3 -12  -7   13.56    6.49
   3 -12  -6   -0.20    5.89
  -3  12   6   -4.86   16.38
  -3 -12   5   18.07    5.56
   3  12  -5   29.11    8.37
   3 -12  -5   32.41    6.97
  -3 -12   4   -3.80    6.28
   3  12  -4   12.26    6.98
   3 -12  -4   -0.04    5.94
  -3 -12   3   46.81    7.99
   3  12  -3   43.12    7.78
   3 -12  -3   51.20    8.72
  -3 -12   2    7.12    6.46
   3  12  -2    6.01    5.92
  -3 -12   1    8.73    6.32
   3  12  -1   17.31    6.36
  -3 -12   0   -6.62    6.14
   3  12   0   -2.99    4.92
  -3 -12  -1   17.24    6.16
   3  12   1   11.30    4.81
  -3 -12  -2    5.31    6.33
   3  12   2    6.17    3.29
   3 -12   2    6.31    5.90
  -3 -12  -3   52.92    8.04
   3 -12   3   69.99    9.15
   3 -12   4   -4.13    5.90
  -3 -12  -4   -1.49    5.42
   3 -12   5   26.54    7.00
   4   0 -20   45.87    6.16
   4   0 -19    3.61    3.96
   4   0 -18    2.37    3.85
  -4   0  17    8.71    6.17
   4   0 -17   -0.54    3.61
  -4   0  16   41.07    8.49
   4   0 -16   47.37    5.62
   4   0 -15    0.22    3.52
  -4   0  15   -1.20    6.24
  -4   0  14  332.49   17.28
   4   0 -14  380.72   11.99
  -4   0  13   -0.54    5.95
   4   0 -13    3.51    3.18
  -4   0  12   10.20    5.95
   4   0 -12    8.41    3.20
  -4   0  11    4.86    6.54
   4   0 -11   -2.06    2.65
  -4   0  10  180.80   11.79
   4   0 -10  183.32    9.30
   4   0 -10  189.51    7.02
   4   0  -9   -0.75    2.77
  -4   0   9    0.10    5.20
   4   0  -9    1.03    2.26
   4   0  -8 1299.41   21.60
   4   0  -8 1345.91   14.91
  -4   0   8 1372.54   27.23
  -4   0   7    5.38    5.64
   4   0  -7    1.55    2.67
   4   0  -7   -0.74    1.69
   4   0  -7   -2.87    1.70
  -4   0   7   -0.60    3.93
   4   0  -6   12.66    1.69
   4   0  -6    9.20    3.08
  -4   0   6    7.90    5.49
   4   0  -6   10.43    1.46
   4   0  -6   19.11    1.96
  -4   0   6    9.13    3.51
   4   0  -5   -1.89    2.60
  -4   0   5    5.72    4.40
  -4   0   5   -0.81    2.34
  -4   0   4  379.07    8.77
   4   0  -4  397.06   11.24
   4   0  -4  418.48   12.80
   4   0  -3    1.51    2.43
   4   0  -3    3.15    3.46
   4   0  -2 2598.05   25.43
   4   0  -2 2673.74   20.69
   4   0  -1   -1.31    1.54
   4   0  -1   -1.12    2.46
   4   0  -1    2.28    2.29
   4   0   0   14.20    2.67
   4   0   0   17.74    2.71
   4   0   0   15.05    2.86
   4   0   1    1.48    1.85
   4   0   1    0.38    2.03
   4   0   2   67.43    4.34
   4   0   2   72.97    2.87
   4   0   3    1.90    1.03
   4   0   3    2.39    2.23
   4   0   4 2445.02   11.16
   4   0   4 2450.46   27.03
   4   0   5    0.56    0.96
   4   0   5    3.05    2.95
   4   0   6  430.79    6.28
   4   0   6  385.36   12.26
   4   0   6  409.97   22.94
   4   0   7    2.09    1.58
   4   0   7   15.71    8.75
   4   0   8   10.27   11.09
   4   0   8   66.61    3.96
   4   0   9    1.41    2.44
   4   0   9    8.10    9.13
   4   0  10  168.26   29.84
   4   0  11    9.47   11.55
   4   0  12   54.60   19.50
   4   0  13   -3.24   15.04
   4   0  14   19.52   18.64
   4   0  15   -8.57   18.37
   4   0  16  -13.15   25.75
   4   0  17  -27.83   26.18
   4   1 -20   -2.83    4.72
   4  -1 -20   -3.06    4.41
   4  -1 -19   28.78    5.67
   4   1 -19   23.22    5.14
   4  -1 -18   -0.28    3.81
   4   1 -18   -0.64    4.05
  -4   1  17  143.98   10.99
   4   1 -17  159.20    9.10
   4  -1 -17  163.83    8.86
  -4  -1  16   10.18    6.45
  -4   1  16   -4.39    6.04
   4   1 -16    2.69    3.81
   4  -1 -16    0.59    3.38
   4   1 -15   15.35    4.71
  -4  -1  15   11.66    6.46
  -4   1  15    8.68    6.71
   4  -1 -15   14.50    3.78
  -4  -1  14   -7.19    6.39
  -4   1  14    1.65    6.28
   4   1 -14    0.14    3.29
   4  -1 -14   -0.17    2.91
  -4  -1  13  121.25   10.94
  -4   1  13  125.39   11.94
   4   1 -13  106.91    6.69
   4  -1 -13  105.13    6.22
   4   1 -12   23.95    3.92
   4  -1 -12   21.15    3.62
  -4  -1  12   20.86    6.34
  -4   1  12   12.26    6.02
  -4  -1  11  839.64   25.32
  -4   1  11  746.78   24.12
   4  -1 -11  750.21   18.24
   4   1 -11  808.78   15.43
   4  -1 -11  770.93   13.76
   4   1 -10    2.63    3.57
   4  -1 -10   -1.32    3.33
  -4  -1  10    8.97    5.62
  -4   1  10    3.64    5.92
   4   1 -10   -0.05    2.58
   4  -1 -10    2.13    2.32
   4   1  -9   13.97    3.83
   4  -1  -9   14.67    2.56
   4   1  -9    9.95    2.84
   4  -1  -9    6.90    2.92
  -4  -1   9   15.00    5.26
  -4  -1   8    1.90    6.45
   4  -1  -8   11.28    3.54
   4   1  -8   13.15    3.66
   4   1  -8   15.93    2.60
   4  -1  -8   15.87    2.27
  -4  -1   8   13.00    4.52
  -4   1   8   13.96    5.12
   4   1  -7  184.07    5.79
   4  -1  -7  206.98    5.72
  -4   1   7  199.76   14.39
  -4  -1   7  174.12    9.18
   4   1  -7  177.69    9.01
  -4   1   7  216.97   11.13
   4   1  -7  185.81    5.59
   4  -1  -7  183.32    4.63
  -4  -1   7  180.41   11.91
   4  -1  -7  182.45    8.07
   4   1  -6    2.52    3.27
   4  -1  -6    7.63    2.69
   4  -1  -6    6.57    1.49
   4   1  -6    2.57    1.58
   4  -1  -6    7.01    1.42
  -4  -1   6    2.00    3.30
  -4   1   6    7.15    3.62
  -4   1   6    9.89    7.14
   4   1  -6    1.95    1.64
   4  -1  -6    2.67    1.06
  -4  -1   6   -0.62    4.67
   4   1  -6    2.25    1.45
   4   1  -5 2353.36   29.09
  -4  -1   5 2358.09   25.74
  -4   1   5 2356.71   27.77
   4  -1  -5 2347.47   25.04
   4   1  -5 2387.56   11.88
   4   1  -5 2418.43   12.09
  -4  -1   5 2314.74   33.82
   4   1  -4   -0.88    2.80
   4  -1  -4   -1.02    2.44
   4   1  -4   -1.82    3.14
  -4  -1   4   -0.74    1.99
  -4   1   4   -0.27    2.00
   4  -1  -4    2.14    4.87
  -4  -1   3  101.97    3.97
   4  -1  -3  103.29    5.15
   4  -1  -3  127.48    8.75
   4   1  -3  110.75    6.09
   4   1  -3  105.27    3.82
   4   1  -3  103.10    6.17
   4   1  -2   -0.22    2.91
   4  -1  -2    0.08    2.27
   4   1  -2    0.85    2.29
   4  -1  -2   -1.89    2.13
   4   1  -2   -0.15    1.36
   4  -1  -2   -0.91    4.17
   4  -1  -1  304.32    7.79
   4   1  -1  320.31    7.17
   4   1  -1  306.38    8.07
   4  -1  -1  292.05    7.80
   4  -1  -1  332.94   11.95
   4   1  -1  306.64   10.60
   4  -1   0   32.48    2.91
   4  -1   0   26.64    4.60
   4   1   0   18.68    2.30
   4   1   0   14.37    2.36
   4  -1   0   23.56    3.05
   4  -1   1 2282.85   16.81
   4   1   1 2297.58   18.39
   4   1   1 2237.72   20.45
   4   1   2   11.76    1.70
   4  -1   2   16.23    2.84
   4   1   2   14.85    2.56
   4  -1   2   19.11    3.51
   4   1   3   34.12    2.26
   4   1   3   37.18    3.91
   4  -1   3   44.22    4.06
   4   1   4    0.06    2.66
   4   1   4   -0.47    1.09
   4  -1   4    1.95    2.71
   4  -1   5  147.35    7.37
   4   1   5  127.30    3.92
   4  -1   6   20.02    1.75
   4  -1   6   20.83    3.27
   4  -1   6   27.59    4.29
   4  -1   7 1359.24   13.03
   4   1   7 1406.29   15.06
   4  -1   7 1267.97   22.98
   4  -1   7 1192.10   21.26
   4  -1   8   -0.13    4.76
   4  -1   8    2.89    1.97
   4   1   8    0.61    1.95
   4  -1   9   48.13    4.11
   4   1   9    6.51   17.84
   4  -1   9   26.84    7.68
   4  -1  10    3.24    3.40
   4  -1  10    2.44    6.27
   4   1  10  -11.68   16.35
   4  -1  11   -0.13    7.67
   4   1  11   -0.46   18.08
   4   1  12   -1.02   17.78
   4  -1  12    0.16    8.58
   4   1  13  328.36   44.62
   4  -1  13  279.30   25.83
   4  -1  14   29.79   13.43
   4   1  14    9.77   20.18
   4   1  15   14.59   24.27
   4  -1  15   13.76   17.37
   4  -1  16   10.89   15.10
   4  -1  17   -3.49   18.69
   4   1  17   12.64   24.51
   4   2 -20   55.37    7.11
   4   2 -19   -5.02    4.62
   4  -2 -19    4.90    4.44
  -4   2  18   -0.19    5.68
   4   2 -18    8.63    4.59
   4  -2 -18    3.05    3.87
  -4   2  17   -1.26    6.72
   4   2 -17    2.53    4.19
   4  -2 -17    4.62    3.75
  -4  -2  16   76.66    8.28
   4   2 -16   68.78    6.72
   4  -2 -16   61.39    5.69
  -4  -2  15   -4.45    6.63
  -4   2  15    2.34    6.59
   4   2 -15    4.27    3.94
   4  -2 -15    8.57    3.71
  -4  -2  14  398.91   18.53
   4  -2 -14  372.30   11.20
   4   2 -14  379.78   12.98
   4  -2 -13    4.52    2.82
  -4  -2  13   -0.78    6.15
  -4   2  13   13.74    7.00
   4   2 -13   -0.98    3.39
   4   2 -12   35.37    5.08
   4  -2 -12   21.76    3.54
  -4  -2  12   28.50    7.77
   4  -2 -11    4.20    3.63
  -4  -2  11    1.35    6.12
  -4   2  11   -5.06    6.30
   4   2 -11   -1.44    3.12
   4  -2 -11   -0.93    2.34
   4   2 -10   94.31    7.37
  -4  -2  10   92.19    8.90
  -4   2  10   94.67   10.04
   4  -2 -10   96.26    6.74
   4   2 -10   92.54    5.97
   4  -2 -10  101.55    4.98
   4   2  -9    3.28    3.38
   4  -2  -9    1.74    2.94
  -4  -2   9   10.81    5.20
  -4   2   9    1.15    5.67
   4   2  -9    4.49    2.76
   4  -2  -9    2.20    2.05
   4  -2  -8 1218.03   15.78
   4   2  -8 1231.11   24.36
  -4   2   8 1256.55   29.08
   4  -2  -8 1171.44   20.43
   4   2  -8 1207.77   16.88
   4  -2  -8 1181.85   12.70
  -4  -2   8 1206.76   29.35
   4  -2  -7   20.09    2.32
   4  -2  -7   13.75    3.57
   4   2  -7    6.60    3.95
   4  -2  -7   14.38    1.80
  -4  -2   7    6.23    3.86
  -4   2   7   15.58    4.81
  -4  -2   7    3.16    4.66
   4   2  -7    8.50    2.46
   4   2  -6   52.82    5.73
  -4  -2   6   55.71    5.34
  -4   2   6   51.28    5.93
   4  -2  -6   55.67    4.70
   4   2  -6   63.54    3.61
   4   2  -6   63.30    3.11
  -4  -2   6   44.58    6.22
   4  -2  -5    7.43    4.91
  -4  -2   5   14.42    3.35
   4   2  -5   12.30    3.80
   4   2  -5   13.21    1.78
   4  -2  -5   12.85    2.75
   4   2  -5   10.83    1.53
  -4   2   5   13.96    3.37
  -4  -2   5   12.65    4.47
   4   2  -4  218.38    9.68
  -4  -2   4  216.41    7.17
  -4   2   4  230.81    8.34
   4  -2  -4  208.65    7.22
  -4  -2   4  188.65    9.34
   4   2  -3   62.67    5.99
  -4  -2   3   59.27    3.53
   4  -2  -3   45.86    3.64
   4  -2  -3   79.06    9.11
   4   2  -3   72.25    4.95
   4   2  -3   62.92    2.50
  -4  -2   2 3764.16   23.96
   4   2  -2 3904.05   20.10
   4  -2  -2 3664.04   26.63
   4   2  -2 3926.31   31.65
   4  -2  -2 3966.58   48.62
   4   2  -2 3702.74   40.41
   4  -2  -1   47.19    3.25
   4   2  -1   32.58    2.35
   4  -2  -1   45.99    7.65
   4  -2  -1   45.85    3.98
   4   2   0   91.75    4.41
   4  -2   0  107.96    5.59
   4   2   0   96.14    3.95
   4  -2   0  101.79   10.06
   4  -2   0  103.49    3.90
   4  -2   1    8.42    8.06
   4  -2   1    6.26    1.55
   4   2   1    5.70    1.75
   4   2   1    5.53    2.17
   4  -2   1    2.05    2.43
   4  -2   2   48.72    2.18
   4   2   2   55.93    3.13
   4  -2   2   52.46    6.73
   4  -2   2   56.13    4.67
   4  -2   3   39.64    1.58
   4   2   3   47.71    2.93
   4  -2   3   29.38    3.87
   4   2   4 1765.09   15.58
   4  -2   4 1780.37   24.11
   4  -2   5    1.45    1.26
   4   2   5    1.13    1.51
   4  -2   5    1.58    0.68
   4  -2   5    1.14    2.84
   4  -2   6   21.93    2.47
   4   2   6   32.70    2.84
   4  -2   6   22.38    1.75
   4  -2   6   20.93    4.30
   4  -2   7    3.87    2.08
   4  -2   7    4.28    2.12
   4   2   7    7.68    2.23
   4  -2   7    0.76    3.47
   4  -2   8   48.44    5.91
   4  -2   8   41.76    3.99
   4  -2   9    4.49    2.88
   4   2   9    7.43   15.67
   4  -2   9    6.17    3.76
   4  -2  10  631.36   19.20
   4  -2  10  581.31   16.43
   4   2  11  -10.89   17.76
   4  -2  11    6.78    5.65
   4  -2  12   24.80    9.23
   4   2  12    0.39   18.94
   4  -2  13   -5.90    8.52
   4   2  13  -10.68   21.42
   4  -2  14    3.17    8.61
   4   2  14   32.97   19.38
   4   2  15  -21.91   21.47
   4  -2  15   12.16   11.03
   4   2  16    5.23   26.71
   4  -2  16   24.52   15.91
   4  -2  17   -9.13   14.61
   4   2  17  -10.26   22.53
   4   3 -19   13.07    5.32
   4  -3 -19   18.97    4.64
  -4   3  18    2.44    5.67
   4   3 -18    3.30    4.38
   4  -3 -18   -4.88    3.96
  -4   3  17  100.00   10.22
   4   3 -17  102.95    8.29
   4  -3 -17  115.15    7.59
  -4  -3  16   10.47    5.42
  -4   3  16   -0.71    6.70
   4   3 -16   -5.21    4.66
   4  -3 -16    4.60    3.64
  -4  -3  15    4.30    6.20
  -4   3  15   14.47    6.46
   4   3 -15   14.15    4.27
   4  -3 -15    7.45    3.49
   4  -3 -14    1.11    2.93
  -4  -3  14   -1.38    6.44
  -4   3  14   -0.19    7.23
   4   3 -14   -0.52    3.87
  -4  -3  13  104.84   10.56
  -4   3  13  115.14   11.54
   4   3 -13  107.40    7.63
   4  -3 -13   88.83    5.59
  -4  -3  12    2.29    6.18
  -4   3  12   -3.37    7.00
   4   3 -12    3.28    3.37
   4  -3 -12   -0.72    2.61
  -4  -3  11  569.26   20.53
  -4   3  11  600.15   23.65
   4   3 -11  566.96   14.83
   4  -3 -11  563.25   11.24
   4  -3 -10    7.02    3.55
  -4  -3  10    4.16    5.01
  -4   3  10   12.19    6.00
   4   3 -10   -0.13    3.04
   4  -3 -10    9.90    2.47
   4   3  -9   12.52    4.73
   4  -3  -9   13.27    2.39
   4  -3  -9   13.95    3.38
  -4  -3   9   14.53    5.46
  -4   3   9    8.35    5.36
   4   3  -9   11.06    3.38
   4   3  -8    3.55    3.94
   4  -3  -8    6.00    2.48
   4  -3  -8    6.10    3.06
  -4  -3   8   -1.31    4.90
  -4   3   8   -0.63    5.37
   4   3  -8    3.54    2.89
   4  -3  -8    5.99    1.88
   4  -3  -7   99.39    3.68
   4   3  -7   81.44    7.27
  -4  -3   7  103.81    7.92
  -4   3   7  114.85   10.32
   4  -3  -7   98.89    6.26
   4   3  -7   90.70    5.30
   4  -3  -7   93.62    3.10
   4   3  -6   34.59    5.52
  -4  -3   6   39.45    4.93
  -4   3   6   47.54    6.82
   4  -3  -6   34.48    4.24
   4   3  -6   44.08    3.62
  -4  -3   6   45.48    6.65
   4   3  -5 1740.70   28.97
  -4  -3   5 1739.44   23.84
  -4   3   5 1954.28   30.71
   4  -3  -5 1919.97   22.98
   4   3  -5 1872.38   17.51
   4   3  -5 1887.28   15.17
  -4  -3   5 1773.05   29.51
   4   3  -4    9.00    4.26
   4  -3  -4   19.96    3.17
   4   3  -4   13.12    1.89
   4   3  -4   13.54    1.54
   4  -3  -4    7.97    5.67
  -4  -3   4   15.25    2.85
  -4  -3   4    5.65    3.99
  -4   3   4   11.52    3.86
  -4  -3   3   85.51    4.75
   4  -3  -3   85.45    4.86
  -4  -3   3   73.21    6.43
   4  -3  -3  100.76   10.92
   4   3  -3   84.09    7.73
   4   3  -2    0.34    2.31
  -4  -3   2   -0.60    1.80
   4  -3  -2   -0.06    2.01
   4  -3  -2   -2.94    7.38
   4  -3  -1   60.40    3.65
  -4  -3   1   41.93    2.82
   4  -3  -1   63.06   10.00
   4   3  -1   52.22    3.84
   4  -3  -1   55.28    4.63
   4  -3   0   30.78    3.81
   4  -3   0   33.94    2.87
  -4  -3   0   39.24    2.59
   4   3   0   44.36    3.48
   4  -3   0   42.86   11.00
   4  -3   1 2001.31   24.27
   4  -3   1 2100.46   16.17
   4   3   1 2035.96   19.80
   4  -3   2   19.12    1.99
   4   3   2    8.34    2.14
   4  -3   2   16.04    3.51
   4  -3   3   79.23    2.97
   4   3   3   69.83    3.80
   4  -3   3   87.87    6.22
   4   3   4   -0.18    1.69
   4  -3   4    2.88    1.26
   4  -3   4    0.14    3.07
   4  -3   5  102.14    6.79
   4   3   5   93.48    4.58
   4  -3   5  100.53    3.05
   4  -3   6   -1.35    1.39
   4  -3   6    0.53    3.16
   4  -3   7 1233.36   13.21
   4  -3   7 1198.87   23.06
   4  -3   8   24.95    4.73
   4  -3   8   34.45    3.37
   4  -3   9   59.79    6.77
   4  -3   9   65.50    5.31
   4  -3   9   67.84    6.59
   4  -3  10    8.87    3.72
   4  -3  11   18.85    5.48
   4  -3  12    1.76    5.76
   4  -3  13  235.24   16.27
   4  -3  14    1.19    7.71
   4  -3  15    6.56    9.30
   4  -3  16   15.49    9.22
   4   4 -19   -1.10    4.77
  -4   4  18    2.57    6.37
   4   4 -18   10.67    5.56
   4  -4 -18    1.03    3.77
  -4   4  17    2.80    6.01
   4   4 -17    2.77    4.48
   4  -4 -17    3.92    3.81
   4   4 -16   29.62    6.13
   4  -4 -16   41.07    4.92
  -4   4  16   27.14    8.43
  -4  -4  15    0.44    5.56
  -4   4  15    2.78    6.48
   4  -4 -15   -1.33    3.34
   4   4 -15    3.87    4.69
  -4  -4  14  254.39   14.48
   4   4 -14  259.04   12.07
   4  -4 -14  244.56    8.81
  -4  -4  13    3.63    5.86
  -4   4  13   -6.22    8.02
   4   4 -13    3.05    4.03
   4  -4 -13    0.16    2.75
   4  -4 -12   18.91    3.47
  -4  -4  12   17.74    6.54
  -4   4  12   19.41    7.40
   4   4 -12   17.54    4.35
  -4  -4  11    5.74    5.40
  -4   4  11    2.63    6.79
   4   4 -11    3.60    3.96
   4  -4 -11   12.95    2.83
  -4  -4  10  118.39    9.92
  -4   4  10  126.28   12.34
   4  -4 -10  103.95    7.33
   4   4 -10  117.81    7.39
   4  -4 -10  113.76    5.05
  -4  -4   9    5.16    5.53
   4  -4  -9    1.71    2.96
  -4   4   9   16.07    8.37
   4   4  -9    6.31    3.43
   4  -4  -9    3.65    1.93
   4  -4  -8  886.49   12.76
  -4  -4   8  835.67   22.22
  -4   4   8  833.06   26.84
   4  -4  -8  823.62   17.40
   4   4  -8  817.64   16.80
   4  -4  -8  878.22   10.58
   4   4  -8  795.99   21.67
   4  -4  -7   39.62    1.81
  -4  -4   7   39.75    5.81
  -4   4   7   40.46    7.71
   4  -4  -7   49.22    4.83
   4   4  -7   28.41    3.96
   4  -4  -7   41.19    1.84
   4   4  -7   35.85    5.79
   4   4  -6   31.88    5.68
  -4  -4   6   24.56    4.55
  -4   4   6   42.06    7.25
   4  -4  -6   37.56    4.34
   4   4  -6   31.25    3.83
   4   4  -5    3.09    4.99
  -4  -4   5    1.09    2.91
   4  -4  -5    1.55    2.69
  -4   4   5   -0.99    5.91
   4   4  -5    0.45    2.58
  -4  -4   4  205.42    8.29
   4  -4  -4  217.47    7.86
   4   4  -4  205.35    6.29
   4   4  -4  230.21    5.48
   4   4  -4  189.16   11.36
   4   4  -3   14.88    2.07
   4   4  -3   13.24    1.62
  -4  -4   3   13.69    2.58
   4  -4  -3    6.11    2.46
   4  -4  -3    7.71    7.84
  -4  -4   2 1444.77   18.89
   4  -4  -2 1477.25   18.20
  -4  -4   1   55.51    3.93
   4  -4  -1   62.81    3.96
  -4  -4   1   46.41    3.66
   4  -4  -1   73.56    5.80
   4  -4  -1   71.89   14.58
   4  -4   0   21.88   10.66
   4  -4   0   31.31    3.04
  -4  -4   0   28.32    2.70
   4  -4   0   36.95    4.56
   4  -4   1    1.61    2.78
   4  -4   1    0.11    2.07
   4  -4   2   75.61    3.75
   4  -4   2   81.38    6.15
   4  -4   3   20.63    4.13
   4  -4   3   21.56    2.29
   4  -4   4 1536.73   14.25
   4  -4   4 1493.45   24.02
   4  -4   5   30.13    4.62
   4  -4   5   40.97    2.77
   4  -4   6  180.82    5.33
   4  -4   6  157.97    8.89
   4  -4   7    0.47    1.92
   4  -4   7    0.04    3.13
   4  -4   8   32.59    3.43
   4  -4   8   30.28    5.75
   4  -4   9    0.36    2.75
   4  -4   9   11.25    5.15
   4  -4  10  337.75   14.39
   4  -4  10  362.36   11.61
   4  -4  11    8.35    4.40
   4  -4  12   43.23    6.43
   4  -4  13   -1.18    5.76
   4  -4  14   12.91    7.60
   4  -4  15    4.86    7.39
   4  -4  16   51.86   14.36
  -4   5  18    0.91    6.13
   4   5 -18    2.76    4.81
   4  -5 -18   -1.12    4.20
  -4   5  17   94.11   10.87
   4   5 -17   77.05    8.16
   4  -5 -17   93.16    6.92
   4   5 -16    2.80    4.90
   4  -5 -16   10.54    4.08
   4   5 -15    9.63    4.99
   4  -5 -15    8.70    3.12
   4   5 -14    0.59    4.79
  -4  -5  14   -1.10    6.35
  -4   5  14   -4.75    6.89
   4  -5 -14    3.70    2.83
  -4  -5  13   64.09    8.66
  -4   5  13   61.74    9.48
   4   5 -13   78.49    7.52
   4  -5 -13   63.36    4.90
   4  -5 -12   11.13    3.15
  -4  -5  12    9.32    6.11
  -4   5  12    7.62    7.30
   4   5 -12    7.08    4.47
  -4  -5  11  378.23   17.18
  -4   5  11  356.35   19.92
   4   5 -11  343.76   13.13
   4  -5 -11  335.66    8.71
   4  -5 -10   21.06    2.93
   4  -5 -10   16.46    4.07
  -4   5  10   24.35    7.18
   4   5 -10   12.21    4.24
   4   5  -9   18.48    4.67
  -4  -5   9   18.33    5.59
   4  -5  -9   14.52    3.45
  -4   5   9    7.45    6.88
   4  -5  -9   11.27    2.29
   4  -5  -8   -0.73    1.62
   4   5  -8   -1.73    3.57
   4  -5  -8   -1.62    1.72
   4  -5  -8    0.98    2.08
  -4  -5   8   -2.79    4.52
   4  -5  -8   -1.92    3.06
  -4   5   8    1.19    6.51
   4   5  -7  143.35   10.56
  -4  -5   7  149.86    9.71
   4  -5  -7  160.71    8.25
   4   5  -7  163.47    8.40
   4   5  -6    3.57    4.69
   4   5  -6   14.00    3.93
  -4  -5   6   14.41    4.49
   4  -5  -6    1.96    2.93
  -4  -5   5 1001.12   20.82
   4  -5  -5 1043.01   18.68
   4   5  -5 1039.98   17.57
   4   5  -5 1040.51   26.89
  -4  -5   4   19.26    3.91
   4  -5  -4   18.67    3.57
   4   5  -4   10.85    2.84
   4   5  -4    9.47    5.93
  -4  -5   3   60.74    5.14
   4  -5  -3   57.77    4.66
   4   5  -3   59.06    3.97
   4   5  -3   54.60    2.93
   4   5  -2   10.49    2.01
   4   5  -2   11.28    1.52
  -4  -5   2    7.84    2.91
   4  -5  -2   11.77    2.83
  -4  -5   1  206.33    8.30
   4  -5  -1  223.26    7.79
   4  -5  -1  200.29    9.28
   4  -5   0    0.40    2.23
   4  -5   0    2.61    3.46
  -4  -5   0    4.81    2.45
   4  -5   1 1146.80   21.13
   4  -5   1 1122.56   15.47
   4  -5   2   60.50    3.99
   4  -5   2   52.44    5.87
   4  -5   3   79.14    6.76
   4  -5   3   83.91    4.54
   4  -5   4   14.44    2.66
   4  -5   4    5.46    3.62
   4  -5   5   49.38    5.77
   4  -5   5   50.87    3.67
   4  -5   6   28.68    5.16
   4  -5   6   29.45    3.21
   4  -5   7  500.46   10.48
   4  -5   7  455.04   14.68
   4  -5   8   30.02    3.84
   4  -5   8   22.86    5.42
   4  -5   9   53.47    4.45
   4  -5   9   44.71    6.49
   4  -5  10   -0.79    3.35
   4  -5  10    1.09    4.49
   4  -5  11    9.50    4.19
   4  -5  12   -0.86    4.50
   4  -5  13  156.31   10.85
   4  -5  14   -1.86    6.42
   4  -5  15   28.56    9.19
  -4   6  17   -8.40    8.09
   4  -6 -17   -1.34    3.48
   4   6 -17    0.88    4.89
   4  -6 -16   33.71    4.96
  -4   6  16   23.14    8.92
   4   6 -16   16.81    5.87
  -4   6  15    7.50    7.91
   4   6 -15    5.83    5.32
   4  -6 -15   -2.29    3.59
  -4   6  14  133.27   13.74
   4   6 -14  145.75   10.28
   4  -6 -14  148.29    7.13
   4   6 -13   15.69    5.91
   4  -6 -13   15.00    3.46
  -4  -6  13    8.99    6.28
  -4   6  13    6.99    7.63
  -4  -6  12    9.95    7.05
  -4   6  12    8.90    7.11
   4   6 -12   15.85    5.52
   4  -6 -12   15.16    3.13
   4   6 -11   -0.66    4.53
  -4  -6  11   -0.23    6.12
  -4   6  11   -4.20    7.63
   4  -6 -11   -2.41    2.57
  -4  -6  10   52.88    8.90
  -4   6  10   76.96   11.84
   4   6 -10   48.74    6.47
   4  -6 -10   69.35    4.10
   4  -6  -9    6.53    2.44
  -4  -6   9   12.39    5.62
  -4   6   9    3.57    7.88
   4  -6  -9    6.78    4.11
   4   6  -9   15.83    4.38
  -4  -6   8  392.75   16.76
   4  -6  -8  413.20   13.55
   4   6  -8  413.84   14.18
   4   6  -7   26.67    4.90
   4  -6  -7   34.54    4.72
  -4  -6   7   26.68    5.85
  -4   6   7   32.05    9.33
  -4  -6   6   43.21    6.09
   4   6  -6   39.88    5.51
   4  -6  -6   39.42    4.83
   4   6  -5   28.13    7.35
  -4  -6   5   30.90    5.32
   4   6  -5   24.92    4.67
   4  -6  -5   26.89    4.20
  -4  -6   4  139.87    8.58
   4   6  -4  153.33    7.63
   4  -6  -4  157.08    8.06
   4   6  -4  167.98   13.21
  -4  -6   3   44.72    5.25
   4   6  -3   52.88    4.76
   4  -6  -3   56.59    5.11
  -4  -6   2  770.86   16.98
   4  -6  -2  916.57   20.64
   4   6  -2  805.09   12.77
   4  -6  -2  912.35   16.98
  -4  -6   1   74.42    5.82
   4   6  -1   56.84    2.86
   4   6  -1   56.73    2.51
   4  -6  -1   76.58    5.46
   4  -6  -1   90.01    7.11
  -4  -6   0   49.35    4.92
   4  -6   0   58.38    4.82
  -4  -6   0   56.49    4.94
   4  -6   0   54.11    5.77
   4  -6   1    0.71    3.48
   4  -6   1    4.26    2.79
   4  -6   2  106.37    5.86
   4  -6   2  130.90    8.88
   4  -6   3   34.22    3.81
   4  -6   3   42.41    5.75
   4  -6   4  630.34   12.68
   4  -6   4  638.24   18.06
   4  -6   5   20.76    3.24
   4  -6   5   15.23    4.48
   4  -6   6   38.15    3.89
   4  -6   6   46.49    6.33
   4  -6   7   -0.76    2.62
   4  -6   7    5.13    4.20
   4  -6   8   50.32    4.65
   4  -6   8   55.66    7.04
   4  -6   9   17.13    4.11
   4  -6   9    6.85    4.61
   4  -6  10  263.39   14.13
   4  -6  10  269.21   10.81
   4  -6  11    8.25    5.30
   4  -6  11    8.30    4.02
   4  -6  12   26.44    5.99
   4  -6  13   13.98    5.74
   4  -6  14   18.96    6.19
   4   7 -16    6.50    6.13
  -4   7  16   11.48    8.02
   4  -7 -16    4.71    3.78
  -4   7  15   23.44    9.16
   4   7 -15   21.08    6.21
   4  -7 -15    9.27    3.60
   4  -7 -14    5.16    3.39
  -4   7  14   -4.57    6.68
   4   7 -14    4.72    5.53
  -4  -7  13   52.39    7.31
   4   7 -13   67.81    7.86
   4  -7 -13   59.82    4.75
  -4   7  13   47.52   10.59
   4  -7 -12    9.56    3.10
   4   7 -12    3.17    4.94
  -4  -7  12    1.05    6.72
  -4   7  12    2.26    8.73
   4  -7 -11  170.53    6.55
  -4  -7  11  170.99   12.96
  -4   7  11  203.21   17.11
   4   7 -11  172.93   10.93
   4  -7 -11  164.26    6.22
   4  -7 -10   13.79    2.48
  -4  -7  10   14.75    6.08
  -4   7  10   14.32    8.17
   4   7 -10    9.85    4.93
  -4  -7   9    3.88    6.12
   4   7  -9    7.33    4.47
  -4  -7   8    1.29    5.78
  -4   7   8    3.51    9.32
   4  -7  -8   -0.10    3.74
   4   7  -8    5.48    4.62
  -4  -7   7   61.74    7.90
   4   7  -7   76.12    7.30
   4  -7  -7   67.13    6.12
  -4  -7   6   29.39    6.27
   4  -7  -6   17.77    4.38
   4   7  -6   30.54    5.07
  -4  -7   5  572.26   17.95
   4   7  -5  532.37   15.42
   4  -7  -5  566.46   15.64
  -4  -7   4   43.12    5.74
   4   7  -4   41.53    5.24
   4  -7  -4   50.36    5.51
  -4  -7   3   36.92    5.20
   4   7  -3   32.11    4.79
   4  -7  -3   43.25    4.98
  -4  -7   2   -2.66    3.84
   4  -7  -2    3.94    3.33
   4   7  -2    0.69    3.04
   4  -7  -2    1.80    4.10
  -4  -7   1   36.94    4.92
   4   7  -1   41.31    3.56
   4  -7  -1   41.12    4.77
   4  -7  -1   35.29    5.31
  -4  -7   0   34.54    4.58
   4  -7   0   41.99    5.22
   4  -7   0   42.42    6.20
  -4  -7  -1  564.29   15.54
   4  -7   1  611.05   17.80
   4  -7   1  640.62   14.99
  -4  -7  -1  539.17   14.83
   4  -7   2   34.38    4.64
   4  -7   2   45.77    6.39
   4  -7   3   58.93    5.04
   4  -7   3   66.05    7.55
   4  -7   4   -1.63    4.31
   4  -7   4    0.61    2.91
   4  -7   5   55.13    4.96
   4  -7   5   75.36    7.67
   4  -7   6   14.83    5.30
   4  -7   6   15.23    3.63
   4  -7   7  348.13   11.12
   4  -7   7  362.80   15.14
   4  -7   8   25.70    4.28
   4  -7   8   29.30    5.95
   4  -7   9   54.56    6.06
   4  -7   9   35.43    7.06
   4  -7  10    8.57    4.16
   4  -7  10    0.15    5.69
   4  -7  11   23.00    6.01
   4  -7  11   15.06    4.42
   4  -7  12    1.22    4.88
   4  -7  13   78.44    8.98
   4  -8 -15   -0.07    3.47
  -4   8  15  -10.64    7.58
   4   8 -15    0.11    6.03
   4  -8 -15    1.24    3.32
   4  -8 -14   63.87    5.47
  -4   8  14   63.25   11.59
   4   8 -14   71.33    8.70
   4  -8 -14   54.21    4.80
   4  -8 -13    8.32    3.46
  -4   8  13   13.56    7.23
   4  -8 -12   10.75    2.68
  -4  -8  12   10.31    5.48
   4   8 -12    7.88    6.31
  -4  -8  11   -6.33    6.44
  -4   8  11    6.59    9.51
   4   8 -11    1.81    5.67
   4   8 -10   42.68    7.12
  -4  -8  10   44.00    8.02
  -4   8  10   29.04    9.77
  -4  -8   9    3.07    6.57
  -4   8   9   15.38   10.38
   4   8  -9   19.03    5.78
  -4  -8   8  181.84   12.48
  -4   8   8  196.44   18.13
   4   8  -8  173.90   11.29
  -4  -8   7   16.87    6.75
   4  -8  -7   20.37    4.73
   4   8  -7   15.19    5.56
   4   8  -6   42.79    6.54
   4  -8  -6   43.10    5.82
  -4  -8   6   26.68    6.04
  -4  -8   5   -0.10    4.86
   4  -8  -5    1.11    3.99
   4   8  -5    2.89    4.25
  -4  -8   4   58.11    7.45
   4   8  -4   65.85    6.65
   4  -8  -3   15.21    5.59
  -4  -8   3   11.87    4.81
   4  -8  -3    6.42    4.25
   4   8  -3   16.10    4.18
  -4  -8   2  315.52   13.51
   4   8  -2  319.32   10.62
   4   8  -1   10.15    3.35
  -4  -8   1    8.28    3.99
   4  -8  -1   21.32    4.37
   4  -8  -1   22.29    5.39
   4   8   0   36.04    2.52
   4   8   0   27.41    2.18
   4  -8   0   36.63    5.16
  -4  -8   0   22.97    4.47
   4  -8   0   36.92    6.03
  -4  -8  -1   -4.16    3.91
   4  -8   1    5.03    3.54
   4  -8   1    2.28    4.28
   4  -8   2   50.65    5.39
   4  -8   2   51.76    7.33
   4  -8   3   11.72    4.09
   4  -8   3   19.24    5.89
   4  -8   4  336.79   12.00
   4  -8   4  374.85   15.68
   4  -8   5   41.57    5.26
   4  -8   5   20.36    5.61
   4  -8   6   50.79    5.53
   4  -8   6   46.48    6.95
   4  -8   7   -2.05    3.69
   4  -8   7    0.13    4.82
   4  -8   8   21.08    5.10
   4  -8   8   29.17    6.45
   4  -8   9    9.32    4.82
   4  -8   9    1.78    5.48
   4  -8  10  117.62    8.55
   4  -8  10  105.32   10.33
   4  -8  11    6.51    5.47
   4  -8  11   13.59    5.23
   4  -8  12   19.13    5.44
   4   9 -14    7.08    7.07
   4   9 -13   26.27    7.25
  -4   9  13    5.79    8.63
  -4   9  12    0.89    9.93
   4   9 -12   -3.23    6.58
  -4   9  11   68.08   12.19
   4   9 -11   68.25    8.79
  -4  -9  11   53.73    7.02
  -4  -9  10    3.46    6.80
  -4   9  10   13.45   10.04
   4   9 -10   -5.11    5.48
  -4  -9   9    5.89    6.81
  -4   9   9   21.31   10.90
   4   9  -9    0.28    6.20
  -4  -9   8   -5.30    6.56
   4   9  -8    5.29    5.66
   4   9  -7   51.47    7.30
  -4  -9   7   33.03    7.44
  -4  -9   6    7.12    6.38
   4  -9  -6    4.24    4.75
   4   9  -6    6.85    4.96
  -4  -9   5  179.89   12.04
   4   9  -5  155.15   10.13
  -4  -9   4   11.54    5.24
   4  -9  -4   22.56    5.37
   4   9  -4   13.08    4.97
   4  -9  -4   21.45    6.14
  -4  -9   3   36.49    6.30
   4  -9  -3   34.68    6.28
   4  -9  -3   43.79    6.19
   4   9  -3   22.87    5.25
   4  -9  -2    1.84    4.82
  -4  -9   2    0.96    4.85
   4   9  -2   -2.02    3.70
   4  -9  -2    8.68    4.05
  -4  -9   1   45.61    6.59
   4   9  -1   54.73    5.00
   4  -9  -1   60.18    6.78
   4  -9  -1   52.84    7.56
   4  -9   0    5.04    4.77
   4  -9   0    4.62    4.41
  -4  -9   0   12.53    4.81
   4   9   0   13.23    2.36
   4  -9   1  267.82   11.99
   4  -9   1  277.67   14.37
   4  -9   2   43.97    7.48
   4  -9   2   38.30    5.59
   4  -9   3   51.95    7.85
   4  -9   3   50.63    6.22
   4  -9   4    0.73    5.11
   4  -9   4    0.75    4.02
   4  -9   5   14.64    5.48
   4  -9   5   20.92    4.84
   4  -9   6    8.92    4.38
   4  -9   6   10.57    5.14
   4  -9   7  127.13    8.78
   4  -9   7  115.15    9.90
   4  -9   8   12.73    5.02
   4  -9   8    7.13    5.99
   4  -9   9   31.04    6.37
   4  -9   9   33.35    7.17
   4  -9  10   14.44    5.63
   4  -9  10    2.04    7.30
   4  -9  11   11.05    6.70
   4  10 -11    5.62    6.42
  -4  10  11  -20.47   11.42
  -4 -10  10    9.09    5.16
  -4  10  10   -0.66   13.13
   4  10 -10   28.85    7.37
   4  10  -9    7.25    5.74
  -4 -10   9   -0.65    6.92
  -4  10   9    4.86   11.65
  -4 -10   8   70.46    9.45
   4  10  -8   74.16    8.46
  -4 -10   7    0.66    7.01
   4  10  -7    5.73    5.46
  -4 -10   6   15.65    6.86
   4  10  -6    8.32    5.38
  -4 -10   5   10.02    6.51
   4  10  -5    7.40    5.14
   4 -10  -5   -0.15    5.12
   4 -10  -4   38.55    6.51
  -4 -10   4   22.87    6.58
   4  10  -4   34.15    5.86
   4 -10  -4   48.15    7.45
   4 -10  -3   11.49    6.09
  -4 -10   3   10.39    5.32
   4  10  -3    7.33    4.84
   4 -10  -3    3.77    4.45
  -4 -10   2  133.17   10.23
   4  10  -2  112.48    7.65
   4 -10  -2  142.00    9.79
   4 -10  -2  143.71   11.11
  -4 -10   1   16.29    5.96
   4  10  -1   12.67    3.65
   4 -10  -1   22.85    5.60
   4 -10  -1   16.50    5.98
  -4 -10   0   22.74    6.19
   4  10   0   13.08    2.07
   4 -10   0   21.80    6.47
  -4 -10  -1    6.88    5.19
   4 -10   1   -0.21    4.23
   4 -10   1   -4.58    4.97
  -4 -10  -2   14.25    5.04
   4 -10   2   29.48    6.05
  -4 -10  -3    7.20    4.72
   4 -10   3   -2.43    5.81
   4 -10   3    7.52    4.69
   4 -10   4  114.06    8.79
   4 -10   4  112.55   10.41
   4 -10   5    8.05    4.88
   4 -10   5    5.52    5.84
   4 -10   6   32.57    6.40
   4 -10   6   25.69    6.75
   4 -10   7    7.62    5.36
   4 -10   7    5.07    5.44
   4 -10   8    9.75    5.85
   4 -10   8    1.34    6.14
   4 -10   9    4.44    5.12
   4 -10   9    4.30    6.98
  -4  11   9   -7.45   13.57
  -4 -11   8   -4.91    6.27
   4  11  -8   -8.63    6.60
  -4 -11   7   13.99    7.70
   4  11  -7   18.65    6.11
   4 -11  -6   -5.31    6.39
  -4 -11   6    4.60    6.80
   4  11  -6    6.14    5.92
  -4 -11   5   82.85   10.14
   4  11  -5   63.92    7.51
   4 -11  -5   72.36    8.79
   4 -11  -4   18.68    6.92
  -4 -11   4    7.94    6.00
   4  11  -4   16.78    5.75
  -4 -11   3    9.68    6.08
   4  11  -3   19.37    5.10
   4 -11  -3    8.39    5.49
  -4 -11   2   -4.03    5.73
   4 -11  -2   -1.99    4.71
   4 -11  -2   -6.36    6.25
   4  11  -2   -0.13    4.18
  -4 -11   1   27.66    7.02
   4  11  -1   15.64    3.60
   4 -11  -1   20.65    6.47
   4 -11  -1   21.53    6.68
  -4 -11   0   17.23    6.32
   4 -11   0    0.48    5.24
   4 -11   0   14.90    6.75
   4 -11   1   84.81    8.89
   4 -11   1   85.81   11.04
  -4 -11  -2   19.25    6.58
   4 -11   2   13.18    8.09
   4 -11   2   15.01    5.62
  -4 -11  -3   11.98    5.27
   4 -11   3   20.70    6.44
  -4 -11  -4   10.10    6.20
   4 -11   4    1.54    5.80
   4 -11   4    3.38    4.87
  -4 -11  -5    9.87    5.41
   4 -11   5   30.23    6.77
   4 -11   5   33.62    7.75
   4 -11   6    6.03    5.62
   4 -11   6    4.54    5.96
   4 -11   7   52.81    8.17
   4 -12  -5   -4.17    6.11
   4 -12  -4   13.28    6.24
   4 -12  -3   -4.00    6.45
   4  12  -2   31.80    4.65
   4 -12  -2   66.03    9.31
   4 -12  -1   14.81    7.05
   4 -12   0   37.54    7.15
   4 -12   0   11.94    7.32
   4 -12   1  -14.03    7.38
   4 -12   1   -4.57    5.93
   4 -12   2   16.59    7.74
   4 -12   2   20.03    6.69
   5   0 -19   62.19    6.11
  -5   0  19   18.76    4.01
  -5   0  18   -3.22    6.53
   5   0 -18   -2.83    4.01
  -5   0  17   16.39    8.46
   5   0 -17    0.72    3.83
  -5   0  16    8.97    7.61
   5   0 -16   -4.90    3.49
   5   0 -15   60.26    5.42
  -5   0  15   33.39    8.63
   5   0 -14    2.86    3.08
  -5   0  14    6.27    7.21
  -5   0  13  389.55   19.35
   5   0 -13  440.33   11.39
  -5   0  12   -8.78    7.11
   5   0 -12    1.98    2.49
  -5   0  11   45.23    8.24
   5   0 -11   43.58    5.74
   5   0 -11   45.49    3.86
   5   0 -10    0.26    3.62
  -5   0  10    6.45    6.38
   5   0 -10   -0.30    2.20
  -5   0   9  101.11    9.45
   5   0  -9   93.54    6.96
   5   0  -9  113.28    4.26
   5   0  -8    3.06    3.64
  -5   0   8   -0.18    4.07
   5   0  -8    0.53    1.34
   5   0  -8    0.32    1.33
  -5   0   7 1262.82   24.64
   5   0  -7 1271.37   22.83
   5   0  -6    2.20    3.26
  -5   0   6    1.51    3.30
   5   0  -5   39.47    4.82
   5   0  -4   -1.69    2.93
   5   0  -4    1.48    3.79
   5   0  -3  105.59    6.51
   5   0  -3  106.82    5.07
   5   0  -2   -0.24    2.86
   5   0  -2   -0.97    3.27
   5   0  -2   -1.40    2.13
   5   0  -1 2169.11   25.06
   5   0  -1 2143.29   22.37
   5   0   0    1.74    3.07
   5   0   0    1.07    2.47
   5   0   0    1.81    2.51
   5   0   1   34.29    3.51
   5   0   1   43.14    4.39
   5   0   1   36.82    3.25
   5   0   2    0.57    1.56
   5   0   2   -0.95    2.62
   5   0   3  195.71    4.45
   5   0   3  187.96    7.56
   5   0   4   -0.03    1.05
   5   0   4    1.46    3.40
   5   0   5 1457.88   10.28
   5   0   5 1432.14   24.00
   5   0   6   -1.08    3.47
   5   0   6   -0.41    1.19
   5   0   7   14.63    2.08
   5   0   8    2.88    9.10
   5   0   8   -1.88    2.05
   5   0   9   34.34    3.75
   5   0   9    5.27   11.28
   5   0  10    3.55   13.14
   5   0  14   -6.12   16.56
   5   0  16   -1.83   18.47
  -5   1  19   -2.58    5.36
   5   1 -19    1.87    4.00
   5  -1 -19   -0.24    3.96
  -5  -1  18   23.03    6.91
  -5   1  18   25.06    8.01
   5   1 -18   26.45    4.84
   5  -1 -18   19.96    4.43
  -5  -1  17   -6.92    7.86
  -5   1  17    9.56    8.45
   5   1 -17    0.20    4.01
   5  -1 -17    0.84    3.54
  -5  -1  16  127.47   12.69
  -5   1  16  130.07   12.64
   5   1 -16  131.40    7.88
   5  -1 -16  144.64    7.73
   5  -1 -15   -0.57    3.18
  -5  -1  15   -1.08    8.03
  -5   1  15    5.47    7.78
   5   1 -15   -0.31    3.54
   5  -1 -14   13.32    3.59
  -5  -1  14    2.05    7.13
  -5   1  14   21.32    8.34
   5   1 -14   12.11    3.57
  -5  -1  13    2.50    6.84
  -5   1  13    5.04    5.99
   5   1 -13   -0.40    3.12
   5  -1 -13   -1.93    2.68
  -5   1  12  123.77   11.94
   5   1 -12  114.64    6.17
   5  -1 -12  120.92    5.72
   5  -1 -11   14.04    2.82
   5  -1 -11   13.25    4.32
  -5  -1  11   12.77    6.18
  -5   1  11   14.53    7.34
   5   1 -11    1.81    2.59
  -5  -1  10  644.56   21.80
  -5   1  10  710.69   24.21
   5   1 -10  635.62   17.72
   5  -1 -10  696.49   17.51
   5   1 -10  732.03   12.41
   5  -1 -10  720.11   10.59
   5  -1  -9   15.62    2.18
   5   1  -9    7.88    4.08
   5  -1  -9   17.00    3.78
   5  -1  -9   18.66    2.06
  -5  -1   9   19.39    5.65
  -5   1   9   11.32    5.08
   5   1  -9   10.64    2.30
   5   1  -8   10.22    4.38
   5  -1  -8    5.51    3.26
  -5  -1   8    4.77    3.98
  -5   1   8    5.75    5.04
   5   1  -8    5.77    1.72
   5   1  -8    6.65    1.63
   5   1  -7    1.05    0.80
   5   1  -7    1.14    3.58
   5  -1  -7    0.43    2.89
  -5  -1   7    1.89    3.48
  -5   1   7    0.44    4.05
   5   1  -7    1.77    0.78
  -5  -1   6  111.99    7.04
   5   1  -6  131.45    8.52
   5  -1  -6  132.41    7.29
  -5  -1   5   21.81    3.47
   5   1  -5   23.92    4.36
   5  -1  -5   20.43    3.91
   5   1  -4 2106.91   28.85
   5  -1  -4 2081.26   25.22
   5   1  -4 2035.48   18.86
   5   1  -3    6.20    3.86
   5  -1  -3   12.39    3.24
   5   1  -3    5.99    3.49
   5   1  -3    2.21    1.73
   5  -1  -3    2.70    4.08
   5  -1  -3    8.35    2.27
   5   1  -2   50.15    5.23
   5  -1  -2   54.81    4.63
   5   1  -2   54.52    4.83
   5  -1  -2   64.42    6.39
   5  -1  -2   57.90    4.40
   5   1  -2   49.59    3.49
   5  -1  -1    1.29    2.29
   5   1  -1    1.91    3.84
   5  -1  -1    3.42    2.65
   5   1  -1   -1.54    2.32
   5  -1  -1    3.46    3.75
   5   1  -1    0.01    2.21
   5  -1   0   96.21    4.97
   5   1   0   90.24    4.79
   5  -1   0  110.70    6.79
   5  -1   0   92.09    5.62
   5   1   0   78.49    4.48
   5  -1   1   12.75    2.45
   5   1   1   26.39    2.70
   5  -1   1   11.98    3.47
   5  -1   1   11.97    3.39
   5   1   1   22.27    3.36
   5  -1   2 1835.66   16.63
   5   1   2 1746.72   15.82
   5  -1   2 1849.57   18.36
   5  -1   2 1741.43   23.04
   5   1   2 1667.26   21.21
   5   1   3   15.43    1.96
   5  -1   3    9.88    2.02
   5  -1   3    5.88    2.76
   5   1   3   10.03    3.18
   5   1   4   53.77    2.84
   5  -1   4   52.65    1.77
   5  -1   4   51.33    4.88
   5   1   4   47.17    4.97
   5   1   5   11.99    1.88
   5  -1   5    3.10    3.23
   5  -1   6   58.42    2.06
   5   1   6   53.66    3.09
   5  -1   6   42.30    5.68
   5  -1   7    5.75    3.90
   5  -1   7    0.82    6.76
   5  -1   7    6.68    1.53
   5   1   7    0.80    1.89
   5  -1   8  866.64   11.44
   5   1   8  798.28   13.17
   5  -1   9   -2.39    7.89
   5  -1   9    5.31    2.75
   5  -1  10   32.63   13.24
   5   1  10    6.66   15.99
   5  -1  11    6.47   10.54
   5   1  11   -9.41   16.41
   5  -1  12  -11.42   12.95
   5   1  12   -0.95   17.42
   5  -1  13  -12.89   16.45
   5   1  13   -5.73   17.03
   5   1  14   30.87   23.22
   5  -1  14   52.06   26.46
   5   1  15   13.54   20.21
   5  -1  15   32.35   21.54
   5   1  16  -18.58   24.52
   5  -1  16   23.64   19.97
   5   2 -19   73.51    7.55
   5  -2 -19   55.66    6.01
  -5  -2  18    1.28    5.24
  -5   2  18   16.44    7.98
   5  -2 -18    4.53    3.69
  -5  -2  17    1.50    7.13
  -5   2  17   -0.31    6.78
   5   2 -17    8.25    4.21
   5  -2 -17    5.29    3.26
  -5  -2  16    0.92    7.20
  -5   2  16   -4.80    8.00
   5   2 -16    1.88    3.72
   5  -2 -16    2.46    3.07
  -5  -2  15   62.24    9.65
  -5   2  15   57.31   10.15
   5   2 -15   57.18    5.76
   5  -2 -15   56.19    4.97
  -5  -2  14    2.96    6.92
  -5   2  14   -1.94    7.21
   5   2 -14    1.98    3.60
   5  -2 -14    2.08    2.74
  -5  -2  13  342.33   18.93
  -5   2  13  345.76   19.49
   5   2 -13  372.34   11.54
   5  -2 -13  340.58    9.24
  -5   2  12   -3.88    6.31
   5   2 -12   -1.24    3.29
   5  -2 -12    4.45    2.68
   5  -2 -11   11.25    2.53
   5  -2 -11    5.07    3.90
  -5  -2  11    9.01    6.07
  -5   2  11    4.95    6.04
   5   2 -11    8.65    3.11
   5   2 -10   -0.29    3.73
   5  -2 -10   -0.42    3.33
  -5  -2  10    2.06    5.30
  -5   2  10   -2.12    7.31
   5   2 -10    2.93    2.58
   5  -2 -10   -1.70    1.83
   5  -2  -9  100.38    3.45
   5   2  -9  100.27    8.21
  -5  -2   9   80.58    8.23
  -5   2   9   97.57   10.73
   5  -2  -9  110.22    7.50
   5   2  -9  109.54    5.19
   5  -2  -9   98.71    2.98
   5   2  -8    3.63    4.14
   5  -2  -8    3.21    3.10
  -5  -2   8    5.19    4.30
  -5   2   8    5.65    5.02
   5   2  -8    7.07    2.05
   5   2  -7  821.67   21.04
  -5  -2   7  799.54   19.45
   5  -2  -7  842.87   17.73
   5   2  -7  841.22    9.09
   5   2  -7  816.63    8.74
   5   2  -6   -1.21    3.53
   5  -2  -6    2.87    2.95
  -5  -2   6   -0.66    3.29
   5   2  -5   34.33    5.31
  -5  -2   5   25.27    3.45
   5  -2  -5   38.34    4.44
   5   2  -5   34.21    2.54
   5   2  -4    1.88    3.66
   5  -2  -4   -0.83    2.69
   5   2  -4    0.66    1.46
   5   2  -3  362.60   13.51
   5   2  -3  486.64    9.11
   5  -2  -3  388.99   10.28
   5  -2  -3  441.19   17.96
   5   2  -2    0.02    4.26
   5  -2  -2    7.90    5.81
   5   2  -2   -0.13    2.55
   5  -2  -2    3.50    2.54
   5  -2  -2    1.26    2.78
   5   2  -2    1.06    1.62
   5  -2  -1 1807.10   18.99
   5   2  -1 1881.94   21.74
   5  -2  -1 1873.32   24.25
   5   2  -1 1843.26   17.53
   5   2   0   10.48    2.47
   5  -2   0   22.77    2.73
   5  -2   0   21.32    6.28
   5  -2   0   21.96    3.70
   5   2   0   12.51    2.45
   5  -2   1   28.54    2.55
   5   2   1   34.11    3.09
   5  -2   1   29.42    4.55
   5   2   1   24.94    3.25
   5   2   2    5.31    2.61
   5  -2   2    5.61    1.62
   5  -2   2   -0.70    5.10
   5  -2   2    2.23    3.04
   5   2   2    2.88    1.75
   5  -2   3   25.54    1.82
   5   2   3   21.21    2.38
   5  -2   3   23.17    4.10
   5  -2   3   20.03    6.33
   5  -2   4    0.64    0.68
   5  -2   4    5.96    4.90
   5   2   4    0.90    1.54
   5  -2   4    1.30    3.56
   5   2   5  965.01   13.42
   5  -2   5  979.09   19.49
   5  -2   6    9.87    1.27
   5   2   6    6.51    2.06
   5  -2   6    5.90    1.69
   5  -2   7  129.48    4.71
   5  -2   7  112.28    4.64
   5  -2   7  113.61    8.19
   5  -2   8    3.28    2.60
   5  -2   8    5.18    4.47
   5  -2   8   -0.70    3.38
   5  -2   9   53.88    4.79
   5  -2   9   24.34    5.86
   5  -2  10    7.77    3.75
   5  -2  10   -7.98    5.70
   5  -2  11  114.74   16.21
   5  -2  12   -5.05    7.66
   5  -2  13    8.10    9.73
   5  -2  14   -0.07   10.41
   5  -2  15   15.92   13.58
   5  -3 -18   26.88    4.82
  -5   3  18   20.99    8.37
   5   3 -18   23.67    4.98
  -5  -3  17    0.03    6.37
  -5   3  17   -3.99    6.55
   5   3 -17    0.67    4.30
   5  -3 -17    1.34    3.39
  -5  -3  16  140.73   12.40
  -5   3  16  108.46   13.00
   5   3 -16  116.33    8.17
   5  -3 -16  115.41    6.68
  -5  -3  15    6.14    7.27
  -5   3  15    1.07    7.06
   5   3 -15    1.34    3.91
   5  -3 -15    4.80    3.26
  -5  -3  14   13.80    7.48
  -5   3  14   15.61    7.45
   5   3 -14   11.94    3.96
   5  -3 -14   12.39    3.34
  -5  -3  13    8.54    7.74
  -5   3  13   -1.85    7.50
   5   3 -13    1.35    3.62
   5  -3 -13    1.48    2.61
  -5  -3  12  120.52   11.31
  -5   3  12  113.80   12.70
   5   3 -12  106.26    6.69
   5  -3 -12  114.75    5.29
   5  -3 -11    2.41    3.46
  -5  -3  11   20.55    7.36
  -5   3  11    4.26    6.98
   5   3 -11   15.33    3.68
   5  -3 -11    8.56    2.39
  -5  -3  10  543.90   20.47
  -5   3  10  559.51   23.02
   5  -3 -10  583.45   16.43
   5   3 -10  560.08   12.62
   5  -3 -10  556.59    7.88
   5   3  -9    0.09    3.93
   5  -3  -9    3.89    3.22
  -5  -3   9    3.76    4.60
  -5   3   9    5.99    6.41
   5   3  -9    0.12    2.51
   5   3  -8   13.01    5.08
   5  -3  -8   10.59    3.80
   5   3  -8   14.94    2.78
  -5  -3   8   14.10    4.82
  -5   3   8   17.44    7.55
   5   3  -7    6.62    5.07
   5   3  -7    1.29    1.86
   5  -3  -7    0.61    2.95
  -5  -3   7   -3.33    4.08
   5   3  -6  157.15   10.00
  -5  -3   6  166.16    8.79
   5  -3  -6  184.54    8.46
   5   3  -6  164.16    3.71
   5   3  -6  170.77    3.62
   5   3  -5   -1.57    4.44
   5  -3  -5   -2.36    2.73
  -5  -3   5   -0.72    2.73
   5   3  -4 1120.16   25.28
  -5  -3   4 1156.41   18.54
   5   3  -3   12.73    4.53
   5  -3  -3   31.33    3.76
   5  -3  -2   62.12    4.43
   5  -3  -2   72.71    8.99
   5  -3  -2   60.37    5.56
   5   3  -2   56.79    7.43
   5  -3  -1    5.44    2.34
   5  -3  -1    2.78    6.21
   5  -3  -1    4.15    2.86
   5  -3   0  183.76    6.06
   5  -3   0  152.65    7.87
   5  -3   0  181.56   13.94
   5  -3   1    5.22    7.25
   5  -3   1    8.73    2.21
   5  -3   1    9.23    3.79
   5  -3   2 1280.65   12.64
   5  -3   2 1298.50   22.64
   5  -3   3   67.22    2.94
   5  -3   3   57.42    5.86
   5  -3   4   78.62    2.69
   5  -3   4   77.92    6.56
   5  -3   5    7.49    1.31
   5  -3   5    8.07    3.77
   5  -3   6   53.83    2.37
   5  -3   6   53.37    5.66
   5  -3   7   16.39    2.17
   5  -3   7   13.84    4.65
   5  -3   8  598.99   10.79
   5  -3   8  570.81   18.22
   5  -3   9    1.17    4.96
   5  -3   9    3.97    2.95
   5  -3  10   39.95    5.92
   5  -3  11    0.05    5.33
   5  -3  12   -1.49    5.65
   5  -3  13   -5.24    7.46
   5  -3  14   41.83   13.57
   5  -3  15    9.14   10.00
   5   4 -18    0.97    4.66
  -5   4  18   12.15    7.69
   5  -4 -18    2.22    3.76
  -5  -4  17    6.21    5.02
  -5   4  17    4.46    7.76
   5  -4 -17    5.98    3.78
   5   4 -17   10.89    4.62
  -5  -4  16    1.23    7.61
  -5   4  16    7.10    6.33
   5  -4 -16   -0.38    3.21
   5   4 -16    0.03    4.13
  -5   4  15   48.68   11.05
   5   4 -15   38.28    5.24
   5  -4 -15   35.77    4.20
  -5  -4  15   50.57    9.24
  -5  -4  14    1.40    7.35
  -5   4  14    0.73    7.51
   5   4 -14    4.19    4.29
   5  -4 -14   -1.04    2.83
  -5  -4  13  258.89   16.43
  -5   4  13  244.78   17.78
   5   4 -13  248.48   10.76
   5  -4 -13  250.03    7.60
  -5  -4  12    2.99    7.49
  -5   4  12    5.34    7.06
   5   4 -12    6.24    3.79
   5  -4 -12   11.78    2.52
  -5  -4  11   32.82    7.85
   5   4 -11   29.67    4.38
   5  -4 -11   25.26    2.64
  -5   4  11   25.23    7.09
  -5  -4  10   -0.08    5.40
   5  -4 -10   -1.60    3.10
  -5   4  10   -6.00    7.03
   5   4 -10    1.66    3.21
  -5  -4   9  107.09    9.79
  -5   4   9  118.60   12.35
   5  -4  -9  111.16    7.61
   5   4  -9  104.16    5.95
   5   4  -8    4.48    4.35
  -5  -4   8   12.27    5.32
   5  -4  -8    5.66    3.69
   5   4  -8   10.58    2.73
   5   4  -7  745.67   21.83
  -5  -4   7  700.19   19.55
   5   4  -7  730.17   12.15
   5   4  -6   12.54    4.88
   5  -4  -6   31.27    4.32
   5   4  -6   23.44    2.50
   5   4  -6   25.32    2.28
  -5  -4   6   12.54    3.96
   5   4  -5   12.94    5.61
  -5  -4   5   15.14    4.22
   5  -4  -5   20.50    4.01
   5   4  -4    4.58    5.30
  -5  -4   4    3.70    2.87
   5  -4  -4    2.19    2.76
   5  -4  -3  112.64    6.00
   5   4  -3  116.79   10.08
   5  -4  -2   25.52    3.66
   5  -4  -2   25.40    4.77
   5  -4  -1 1265.70   17.17
   5  -4  -1 1284.50   22.87
   5  -4   0   17.74    4.41
   5  -4   0   23.00    2.98
   5  -4   1   45.26    3.56
   5  -4   1   46.60    5.39
   5  -4   1   36.14   13.99
   5  -4   2    4.85    9.63
   5  -4   2    6.95    2.28
   5  -4   2    6.36    4.53
   5  -4   3  119.10    4.44
   5  -4   3  130.42    8.79
   5  -4   4   18.41    2.34
   5  -4   4   13.51    4.07
   5  -4   5  814.19   10.11
   5  -4   5  831.32   20.39
   5  -4   6   25.94    2.35
   5  -4   6   20.79    4.99
   5  -4   7   38.70    3.01
   5  -4   7   37.57    5.58
   5  -4   8    1.67    2.38
   5  -4   8    0.65    4.54
   5  -4   9   31.74    3.88
   5  -4   9   29.93    6.03
   5  -4  10    1.43    5.04
   5  -4  10    2.96    3.38
   5  -4  11  209.29   10.05
   5  -4  12    3.76    5.32
   5  -4  13   34.50    8.20
   5  -4  14   -2.58    7.65
   5  -4  15   14.87    9.75
  -5   5  17   -0.86    8.35
   5   5 -17   -6.58    4.61
   5  -5 -17    1.43    3.26
  -5  -5  16   64.79    7.69
   5   5 -16   80.95    7.94
   5  -5 -16   69.44    5.24
  -5  -5  15    7.06    7.70
  -5   5  15    9.33    6.44
   5   5 -15    3.11    4.76
   5  -5 -15    3.35    2.85
  -5  -5  14    8.15    7.69
  -5   5  14   13.09    9.02
   5   5 -14    5.99    3.95
   5  -5 -14   11.12    2.95
  -5  -5  13   -1.95    6.88
  -5   5  13   10.24    8.75
   5   5 -13   -3.92    3.66
   5  -5 -13    1.84    2.39
  -5  -5  12   57.31    9.46
  -5   5  12   64.92   11.92
   5   5 -12   53.85    6.25
   5  -5 -12   52.10    3.23
  -5  -5  11    0.09    5.63
   5   5 -11   -2.24    3.38
  -5   5  10  355.55   21.21
   5  -5 -10  329.92   12.78
   5   5 -10  316.73   11.17
   5  -5  -9   24.12    4.57
   5   5  -9   23.43    4.16
  -5  -5   9   25.73    5.95
  -5  -5   8    7.76    5.08
   5  -5  -8   13.97    4.01
   5   5  -8    6.37    2.95
   5   5  -7    2.76    4.95
  -5  -5   7    7.35    4.57
   5  -5  -7    3.70    3.39
   5   5  -7    8.77    3.18
   5   5  -6   65.96    8.12
  -5  -5   6   51.68    6.32
   5  -5  -6   77.88    6.14
   5   5  -6   64.91    4.11
   5   5  -5   62.78    8.07
  -5  -5   5   47.65    5.82
   5  -5  -5   52.74    5.13
   5   5  -5   55.14    3.06
   5   5  -5   58.59    2.73
   5   5  -4  902.91   26.95
  -5  -5   4  881.19   18.89
   5  -5  -3   68.11    5.24
   5  -5  -3   62.42    6.55
   5   5  -3   53.51    9.46
   5  -5  -2   63.11    4.89
   5  -5  -2   70.66    6.91
   5  -5  -1   -1.61    2.45
   5  -5  -1   -2.93    4.05
   5  -5   0   92.18    5.31
   5  -5   0  103.24    7.72
   5  -5   1   30.39    3.46
   5  -5   1   32.80    5.01
   5  -5   2  836.96   13.39
   5  -5   2  894.60   21.95
   5  -5   3   21.42    3.02
   5  -5   3   22.60    5.33
   5  -5   4   30.82    3.12
   5  -5   4   19.55    4.90
   5  -5   5    6.86    2.31
   5  -5   5    8.21    4.46
   5  -5   6   55.74    3.83
   5  -5   6   63.70    7.16
   5  -5   7    2.56    2.43
   5  -5   7    0.64    4.17
   5  -5   8  386.71    9.80
   5  -5   8  426.93   16.79
   5  -5   9   11.94    3.20
   5  -5   9   14.73    5.45
   5  -5  10   42.98    5.01
   5  -5  10   29.95    6.66
   5  -5  11    0.78    3.73
   5  -5  12   17.17    5.01
   5  -5  13    2.15    5.99
   5  -5  14   78.43   10.67
   5   6 -16    2.43    4.98
   5  -6 -16    1.88    2.96
   5   6 -15   27.75    6.03
   5  -6 -15   22.82    3.37
  -5  -6  15   33.68    7.91
  -5  -6  14   -8.92    8.78
  -5   6  14   -2.14    7.94
   5   6 -14   -2.69    4.79
   5  -6 -14    0.16    2.61
  -5  -6  13  127.16   12.86
  -5   6  13  143.64   14.73
   5   6 -13  132.71    9.22
  -5  -6  12   17.71    7.82
  -5   6  12    0.40    9.02
   5   6 -12    4.16    4.28
  -5  -6  11   23.47    6.60
  -5   6  11   28.55   10.18
   5   6 -11   11.60    4.71
  -5  -6  10   -2.73    5.98
   5   6 -10   -3.12    3.82
   5  -6  -9   70.99    6.88
   5   6  -9   69.74    6.11
  -5  -6   8   22.20    6.59
   5  -6  -8   12.17    4.39
   5   6  -8   20.28    3.96
  -5  -6   7  378.17   16.07
   5  -6  -7  412.29   13.80
   5   6  -7  360.84   10.79
   5   6  -6   11.10    6.05
  -5  -6   6   11.45    5.22
   5   6  -6    6.50    2.89
   5   6  -5   14.77    7.38
  -5  -6   5   27.63    5.05
   5  -6  -5   30.66    4.76
   5   6  -5   25.44    3.06
  -5  -6   4    3.83    3.77
   5  -6  -4    2.89    3.36
   5   6  -4   -0.25    1.37
   5   6  -4    0.14    1.25
   5  -6  -3  138.72    7.60
   5  -6  -3  143.26    9.62
   5  -6  -2    5.46    3.41
   5  -6  -2    0.85    4.26
   5  -6  -1  844.98   16.51
   5  -6  -1  899.14   21.88
   5  -6   0   54.02    4.68
   5  -6   0   61.90    6.88
   5  -6   1   43.08    4.42
   5  -6   1   41.94    5.98
   5  -6   2    3.80    3.15
   5  -6   2    4.37    4.75
   5  -6   3   18.19    3.24
   5  -6   3   20.20    5.76
   5  -6   4    5.74    2.72
   5  -6   4   -0.47    4.73
   5  -6   5  464.07   10.88
   5  -6   5  475.26   17.26
   5  -6   6   30.92    3.72
   5  -6   6   31.65    6.41
   5  -6   7   75.77    5.13
   5  -6   7   67.60    7.84
   5  -6   8   -0.93    3.07
   5  -6   8    5.38    4.86
   5  -6   9   27.16    4.05
   5  -6   9   23.20    6.42
   5  -6  10    8.37    3.89
   5  -6  10    6.15    5.39
   5  -6  11  138.14    9.03
   5  -6  11  125.00   11.29
   5  -6  12    7.73    4.84
   5  -6  13    9.61    5.49
  -5   7  15   -3.00    9.36
   5   7 -15    0.42    4.87
  -5  -7  14    0.96    6.57
  -5   7  14   12.62    9.42
   5   7 -14    6.18    5.12
   5   7 -13    6.00    4.62
  -5  -7  13    4.26    7.87
  -5   7  13   16.21    8.99
   5   7 -12   46.19    6.60
  -5  -7  12   43.39    8.90
  -5   7  12   42.99   10.51
  -5  -7  11    4.56    7.08
  -5   7  11   -6.95    9.77
   5   7 -11   -0.05    4.96
  -5  -7  10  161.78   12.93
   5   7 -10  174.19    9.87
  -5  -7   9   15.28    6.70
   5  -7  -9    4.74    4.32
   5   7  -9    8.62    4.04
   5  -7  -8   29.92    5.52
  -5  -7   8   19.77    6.37
   5   7  -8   21.36    4.55
  -5  -7   7   -1.18    5.11
   5  -7  -7    3.97    4.44
   5   7  -7    0.95    3.42
  -5  -7   6   46.14    6.95
   5   7  -6   53.91    4.91
  -5  -7   5    3.19    4.14
   5  -7  -5   -0.94    3.83
   5   7  -5    3.24    2.76
  -5  -7   4  303.69   13.25
   5   7  -4  280.95    6.53
   5  -7  -4  329.86   12.19
   5   7  -4  314.34   19.53
  -5  -7   3   15.97    4.87
   5  -7  -3   16.53    3.97
   5  -7  -3   20.12    5.57
  -5  -7   2   29.51    5.24
   5  -7  -2   43.24    5.06
   5  -7  -2   43.25    6.20
   5  -7  -1    3.33    3.18
   5  -7  -1    3.69    4.65
   5  -7   0   86.71    6.29
   5  -7   0   63.58    7.26
   5  -7   1   15.66    3.83
   5  -7   1   18.63    5.52
   5  -7   2  380.65   11.61
   5  -7   2  416.92   17.27
   5  -7   3   36.08    4.55
   5  -7   3   36.79    6.94
   5  -7   4   48.03    4.87
   5  -7   4   40.57    6.97
   5  -7   5   -1.30    3.00
   5  -7   5    7.28    4.94
   5  -7   6   31.05    4.33
   5  -7   6   28.97    6.42
   5  -7   7    4.04    3.08
   5  -7   7    1.06    4.65
   5  -7   8  233.49    9.54
   5  -7   8  229.14   13.01
   5  -7   9   17.05    4.64
   5  -7   9    9.72    6.09
   5  -7  10   15.06    4.46
   5  -7  10   32.27    7.69
   5  -7  11    3.25    5.82
   5  -7  11   -1.53    4.57
   5  -7  12   -0.39    5.56
  -5   8  14    2.04    8.68
   5   8 -14   13.05    5.78
  -5  -8  13   61.94    9.37
   5   8 -13   54.65    7.28
  -5   8  13   68.17   12.99
  -5  -8  12    6.11    7.51
  -5   8  12   -3.48   10.60
   5   8 -12    4.03    4.86
  -5  -8  11    6.97    6.41
  -5   8  11   18.89   11.55
   5   8 -11   12.01    4.60
  -5  -8  10   -1.88    7.07
   5   8 -10    1.62    4.42
   5   8  -9   50.13    6.32
  -5  -8   9   33.64    8.02
  -5  -8   8    0.62    6.29
   5  -8  -8   -3.35    4.72
   5   8  -8    9.25    4.10
  -5  -8   7  130.49   11.94
   5   8  -7  156.44    8.68
   5  -8  -6   31.59    5.57
  -5  -8   6   29.24    6.61
   5   8  -6   19.97    4.34
   5  -8  -5   25.92    5.07
  -5  -8   5   12.56    5.75
   5   8  -5   14.98    3.31
  -5  -8   4    8.87    5.20
   5  -8  -4    2.30    3.74
   5   8  -4    2.64    2.47
   5  -8  -4    5.83    5.48
  -5  -8   3   50.69    7.15
   5  -8  -3   62.89    6.51
  -5  -8   2   24.44    5.59
   5  -8  -2   11.20    4.49
   5  -8  -2   18.41    5.46
   5  -8  -1  336.33   12.94
   5  -8  -1  316.93   14.92
   5  -8   0   18.06    4.18
   5  -8   0   21.54    5.75
   5  -8   1   51.65    5.81
   5  -8   1   42.59    7.76
   5  -8   2    5.87    3.67
   5  -8   2   -6.21    6.88
   5  -8   3   28.07    4.79
   5  -8   3   42.16    7.57
   5  -8   4    5.73    3.40
   5  -8   4   13.73    5.75
   5  -8   5  187.63    9.11
   5  -8   5  209.43   12.99
   5  -8   6   16.07    4.23
   5  -8   6    7.40    5.41
   5  -8   7   32.51    5.02
   5  -8   7   53.83    7.83
   5  -8   8    0.51    3.87
   5  -8   8    5.38    6.20
   5  -8   9   14.46    4.62
   5  -8   9   15.50    7.28
   5  -8  10    1.03    4.50
   5  -8  10   -2.06    6.60
   5  -8  11   79.17    8.27
   5  -8  11   52.55    8.84
  -5  -9  12   33.43    8.60
  -5   9  12   39.02   11.41
   5   9 -12   24.59    5.76
  -5  -9  11    7.82    8.44
  -5   9  11    2.84   11.82
   5   9 -11    8.76    5.24
   5   9 -10   72.69    7.95
  -5  -9  10   55.07    9.12
  -5  -9   9   12.53    7.46
   5   9  -9    9.27    4.67
  -5  -9   8    7.28    6.97
   5   9  -8    5.37    4.35
  -5  -9   7   -4.36    7.10
   5  -9  -7    5.69    5.38
   5   9  -7    0.25    4.31
  -5  -9   6   47.40    8.14
   5   9  -6   42.25    5.25
   5  -9  -6   46.70    6.57
   5   9  -5   10.81    4.15
  -5  -9   5    8.12    5.82
   5  -9  -5   16.49    5.30
   5  -9  -5    7.03    5.31
  -5  -9   4  159.06   11.82
   5   9  -4  141.39    5.72
   5  -9  -4  192.51   11.29
   5  -9  -4  210.71   13.35
  -5  -9   3   13.31    5.13
   5  -9  -3   21.02    4.90
   5  -9  -3   17.56    5.91
  -5  -9   2   27.13    5.99
   5  -9  -2   25.72    6.99
  -5  -9   1   -4.87    5.11
   5  -9  -1    1.99    3.95
   5  -9  -1   -0.15    5.21
   5  -9   0   40.13    5.98
   5  -9   0   58.83    8.43
   5  -9   1    7.10    4.39
   5  -9   1    0.04    5.47
   5  -9   2  146.12    9.28
   5  -9   2  166.96   12.56
   5  -9   3   22.19    5.16
   5  -9   3   24.90    7.59
   5  -9   4   29.67    7.99
   5  -9   4   25.48    4.95
   5  -9   5    5.14    6.05
   5  -9   5    2.05    4.33
   5  -9   6   20.10    4.77
   5  -9   6   39.28    8.53
   5  -9   7    6.81    4.39
   5  -9   7    5.60    5.94
   5  -9   8   75.89    7.53
   5  -9   8   83.76   10.76
   5  -9   9   -1.05    5.24
   5  -9   9   21.40    7.95
  -5  10  11    7.60   10.13
  -5 -10  10  -10.27    8.23
   5  10 -10    5.38    5.02
  -5 -10   9   18.79    9.11
   5  10  -9   16.09    5.57
  -5 -10   8    8.04    8.15
   5  10  -8    7.64    4.89
  -5 -10   7   67.72   10.20
   5  10  -7   71.08    6.69
  -5 -10   6   22.58    8.14
   5  10  -6    8.16    4.22
   5 -10  -6    9.44    6.48
   5 -10  -5   11.83    6.14
  -5 -10   5   -4.56    6.54
   5 -10  -5   14.06    5.77
   5  10  -5   10.31    3.63
  -5 -10   4   -0.84    5.88
   5 -10  -4   -2.37    4.99
   5  10  -4    0.11    2.43
   5 -10  -4   13.15    6.32
   5 -10  -3   38.56    6.65
  -5 -10   3   25.82    6.46
   5 -10  -3   36.72    7.85
  -5 -10   2    9.96    5.94
   5 -10  -2    1.85    4.71
   5 -10  -2   13.42    6.52
  -5 -10   1  100.16    9.61
   5 -10  -1  131.71   10.09
   5 -10  -1  132.29   11.46
   5 -10   0   13.99    6.45
   5 -10   0   32.70    6.39
  -5 -10   0   26.81    6.90
   5 -10   1   34.50    6.18
   5 -10   1   17.54    7.44
   5 -10   2    8.64    5.40
   5 -10   2    6.73    7.30
   5 -10   3   29.86    6.40
   5 -10   3   26.31    7.76
   5 -10   4    0.51    5.96
   5 -10   4    5.87    4.77
   5 -10   5  116.37   11.42
   5 -10   5   72.72    7.89
   5 -10   6   17.98    5.62
   5 -10   6   30.08    7.91
   5 -10   7   31.34    6.53
   5 -10   7   26.04    7.62
   5 -11  -7    1.44    6.73
  -5 -11   6   10.38    7.87
   5  11  -6   17.70    4.21
   5 -11  -6   16.22    7.10
  -5 -11   5    1.68    7.39
   5  11  -5    5.77    3.26
   5 -11  -5   -5.56    6.72
   5 -11  -4   55.94    7.97
  -5 -11   4   38.83    7.97
   5 -11  -4   65.92    9.88
   5 -11  -3   22.80    7.07
  -5 -11   3   13.10    6.73
   5 -11  -3    9.18    6.61
  -5 -11   2    8.25    5.79
   5 -11  -2    8.13    5.53
   5 -11  -2   18.87    7.30
  -5 -11   1   12.55    7.18
   5 -11  -1   -5.08    5.51
   5 -11  -1   -6.21    6.94
  -5 -11   0    8.32    6.10
   5 -11   0   11.89    5.72
   5 -11   0   23.39    8.40
  -5 -11  -1    6.69    6.23
   5 -11   1    6.03    5.14
   5 -11   1    3.93    6.65
  -5 -11  -2   48.33    7.60
   5 -11   2   74.19    8.40
   5 -11   2   55.71    9.67
   5 -11   3   10.53    7.13
   5 -11   3    5.88    5.80
   5 -11   4   16.84    7.56
   6   0 -18   76.85    6.14
  -6   0  18   55.18   10.58
  -6   0  17   16.19    9.30
   6   0 -17   -2.94    3.52
  -6   0  16    4.54    8.00
   6   0 -16    3.31    3.46
  -6   0  15   -5.84    8.33
   6   0 -15    2.47    3.14
   6   0 -14   66.32    4.55
  -6   0  14   35.02    8.40
  -6   0  13    4.02    7.08
   6   0 -13   -1.13    2.36
  -6   0  12  373.85   20.22
   6   0 -12  351.16    7.27
   6   0 -11    0.53    4.04
  -6   0  11    6.27    5.89
   6   0 -11   -0.34    1.42
   6   0 -11   -1.25    1.50
   6   0 -10    8.77    3.99
  -6   0  10   14.87    5.88
   6   0  -9   -0.63    3.36
   6   0  -8  103.01    7.89
   6   0  -7   -2.60    3.50
   6   0  -6  654.60   17.32
   6   0  -5    1.53    3.51
   6   0  -5   -1.73    2.69
   6   0  -4    7.81    3.93
   6   0  -4    9.04    2.60
   6   0  -3    0.22    3.44
   6   0  -3    4.42    2.27
   6   0  -2  152.66    8.28
   6   0  -2  142.05    7.94
   6   0  -2  129.92    6.49
   6   0  -1   -3.17    3.61
   6   0  -1    8.17    3.74
   6   0  -1    0.35    2.83
   6   0   0 1729.20   24.05
   6   0   0 1672.82   22.04
   6   0   0 1628.53   22.32
   6   0   1   -2.63    3.35
   6   0   1    1.87    2.39
   6   0   1    2.89    3.14
   6   0   2  121.54    6.85
   6   0   2  108.62    4.55
   6   0   2  111.52    6.77
   6   0   3   -0.08    1.56
   6   0   3   -0.46    3.01
   6   0   4   19.46    1.83
   6   0   4   14.02    4.28
   6   0   5   -0.01    1.34
   6   0   5   -2.14    3.83
   6   0   6  648.69    8.23
   6   0   6  614.54   17.78
   6   0   7   -1.29    1.71
   6   0   8   87.59    4.21
   6   0   9    2.08    2.43
  -6  -1  18    7.68    8.02
  -6   1  18   -5.38    9.15
   6   1 -18   -2.25    3.95
   6  -1 -18   -0.48    3.50
   6   1 -17   29.85    4.87
  -6  -1  17   24.08    9.56
  -6   1  17   36.63    9.94
   6  -1 -17   19.59    3.92
  -6  -1  16   11.42    7.62
  -6   1  16   -3.82    8.32
   6   1 -16    5.39    3.75
   6  -1 -16    4.61    3.29
  -6  -1  15  128.93   13.35
  -6   1  15  152.36   14.77
   6   1 -15  146.68    7.31
   6  -1 -15  153.54    6.44
   6   1 -14    1.73    2.85
  -6  -1  14   -0.48    7.14
  -6   1  14   -7.77    7.33
   6  -1 -14    1.40    2.59
  -6  -1  13    1.49    6.93
  -6   1  13    7.84    6.85
   6   1 -13    8.62    2.99
   6  -1 -13   11.58    2.59
  -6  -1  12    5.03    6.37
  -6   1  12   -3.12    7.77
   6   1 -12    0.46    2.33
   6  -1 -12    2.46    1.70
  -6  -1  11   87.28   10.33
  -6   1  11   87.11   11.33
   6   1 -11   84.83    8.05
   6  -1 -11   94.22    7.89
   6   1 -11   97.77    3.89
   6   1 -10   12.26    4.97
   6  -1 -10    0.03    3.75
  -6  -1  10    1.24    5.93
  -6   1  10    6.73    6.32
  -6  -1   9  544.54   19.30
   6   1  -9  577.17   17.93
   6  -1  -9  607.62   17.47
   6   1  -8    0.57    4.04
   6  -1  -8   -1.17    3.44
   6   1  -7   18.36    5.18
   6  -1  -7   10.77    3.93
   6   1  -6    1.18    3.91
   6  -1  -6    0.58    3.26
   6   1  -5  125.77    8.73
   6  -1  -5  133.39    7.86
   6   1  -5  133.92    5.71
   6   1  -4    4.44    3.85
   6  -1  -4    3.79    3.30
   6  -1  -4    7.07    3.16
   6   1  -4    0.40    2.26
   6   1  -3 1130.13   22.72
   6  -1  -3 1147.52   19.56
   6  -1  -3 1196.31   19.48
   6   1  -3 1222.62   17.03
   6   1  -2    0.87    3.95
   6  -1  -2    1.67    3.12
   6  -1  -2    3.34    3.99
   6  -1  -2    1.78    2.79
   6   1  -2    1.49    2.33
   6   1  -1   50.62    5.87
   6  -1  -1   48.00    4.64
   6   1  -1   58.76    5.02
   6  -1  -1   62.20    6.19
   6  -1  -1   61.19    5.28
   6   1  -1   54.19    4.34
   6   1   0    8.64    4.33
   6   1   0    4.94    2.64
   6  -1   0    3.17    2.97
   6  -1   0    0.88    3.15
   6  -1   0    1.20    3.16
   6   1   0    5.82    2.61
   6  -1   1  144.86    6.32
   6   1   1  150.25    5.90
   6  -1   1  166.96    7.34
   6  -1   1  133.81    7.41
   6   1   1  138.93    6.80
   6   1   1  168.03    9.80
   6  -1   2    4.71    2.54
   6  -1   2    8.45    2.73
   6   1   2   14.67    2.47
   6  -1   2    3.57    3.16
   6   1   2    7.41    2.86
   6  -1   3 1032.25   13.72
   6   1   3  958.00   12.47
   6  -1   3  988.04   11.28
   6  -1   3  956.73   19.88
   6   1   3  968.37   19.45
   6   1   4   15.30    4.44
   6   1   4   15.38    2.04
   6  -1   4   24.13    1.73
   6  -1   4   17.09    3.81
   6   1   5   22.75    2.49
   6  -1   5   19.79    1.19
   6  -1   5   20.36    4.63
   6  -1   6    1.71    0.85
   6   1   6    2.63    1.83
   6  -1   6    2.89    4.44
   6  -1   7   46.30    2.13
   6   1   7   49.40    3.55
   6  -1   7   50.36    6.80
   6  -1   8   -2.42    2.05
   6  -1   9  460.35   10.28
   6  -1  10    5.54    3.15
   6   2 -18   54.19    6.01
   6  -2 -18   67.30    5.47
  -6  -2  18   38.98    9.92
  -6   2  18   43.55   10.06
  -6  -2  17    2.51    7.81
  -6   2  17    5.14    7.47
   6   2 -17    6.62    3.73
   6  -2 -17    3.42    3.42
  -6  -2  16   -3.46    8.08
  -6   2  16   -0.90    8.50
   6   2 -16    4.28    3.59
   6  -2 -16    2.35    3.07
  -6  -2  15    2.34    7.92
  -6   2  15    5.80    7.62
   6   2 -15   -1.45    3.43
   6  -2 -15    3.26    2.73
  -6  -2  14   45.96   10.98
   6   2 -14   42.51    4.63
   6  -2 -14   36.18    3.20
  -6   2  14   34.88    9.87
  -6  -2  13   -1.13    6.77
  -6   2  13   -5.38    8.63
   6   2 -13   -4.59    2.99
   6  -2 -13   -0.48    1.86
  -6  -2  12  263.56   16.42
  -6   2  12  289.83   18.38
   6   2 -12  296.14    8.23
   6  -2 -11   -1.67    3.87
  -6  -2  11   11.62    7.05
  -6   2  11    1.89    7.01
   6   2 -11    0.42    2.34
   6   2 -10    8.22    4.36
   6   2 -10   12.62    2.10
   6  -2 -10   14.45    4.07
  -6  -2  10   16.93    6.73
   6   2  -9   -2.63    4.47
   6  -2  -9    0.18    3.57
  -6  -2   9    2.82    4.51
   6   2  -8  128.31    9.78
   6  -2  -8  120.17    8.22
   6   2  -7    3.05    4.48
   6  -2  -7    4.29    3.36
   6   2  -6 1011.71   24.20
   6  -2  -6 1017.02   19.66
   6   2  -5   16.56    5.03
   6  -2  -5   20.83    4.03
   6   2  -4   28.06    5.68
   6  -2  -4   26.81    4.10
   6  -2  -4   26.12    4.17
   6   2  -4   31.22    3.16
   6   2  -3   -0.70    4.53
   6  -2  -3   -1.16    2.80
   6  -2  -3    0.60    3.04
   6   2  -3    3.08    2.03
   6   2  -2  143.50    9.67
   6  -2  -2  145.14    6.83
   6  -2  -2  151.58    7.95
   6   2  -2  141.14    5.67
   6  -2  -1   10.44    2.89
   6   2  -1   16.39    2.69
   6  -2  -1   15.94    6.13
   6  -2  -1    7.59    3.25
   6   2  -1   12.49    4.83
   6  -2   0 1150.38   15.76
   6  -2   0 1224.35   21.82
   6   2   0 1146.69   17.55
   6  -2   1   12.56    2.56
   6  -2   1   10.90    4.07
   6   2   1    1.29    2.87
   6   2   2   16.74    3.49
   6  -2   2   13.03    2.26
   6  -2   2   19.71    4.29
   6  -2   3    1.95    1.61
   6  -2   3   -1.77    3.12
   6  -2   3   -0.98    3.36
   6  -2   4   67.57    2.30
   6  -2   4   61.02    3.19
   6  -2   4   67.67    6.67
   6  -2   5    5.60    3.58
   6  -2   6  614.51   18.60
   6  -2   7    1.43    4.42
   6  -2   8   52.13    6.96
   6  -2  10   15.97    6.96
   6  -2  13   -3.78   11.12
   6  -2  14   -2.20   12.10
  -6  -3  18    0.62    7.61
   6  -3 -18    1.83    3.31
  -6  -3  17   33.40   10.44
   6   3 -17   31.66    5.22
  -6   3  17   25.54    9.62
   6  -3 -17   17.34    3.29
  -6  -3  16   -3.78    7.57
  -6   3  16    6.34    7.81
   6   3 -16   -2.76    3.64
   6  -3 -16    1.54    2.61
  -6  -3  15  130.57   13.33
  -6   3  15  106.35   13.96
   6   3 -15  118.88    7.29
   6  -3 -15  100.80    4.43
  -6  -3  14   -2.54    7.58
   6   3 -14    0.88    3.38
   6  -3 -14   -0.61    1.58
  -6  -3  13    6.25    7.11
  -6   3  13    5.71    8.04
   6   3 -13   12.36    3.80
  -6  -3  12    2.63    7.08
  -6   3  12   -4.58    7.11
   6   3 -12   -2.14    2.92
  -6  -3  11   68.60    9.23
   6  -3 -11   92.61    7.81
   6   3 -11   85.20    4.73
   6  -3 -10    2.07    3.62
  -6  -3  10   11.46    6.12
   6   3 -10    3.89    2.17
   6   3  -9  494.13   19.15
  -6  -3   9  449.49   18.04
   6  -3  -9  519.74   15.97
   6   3  -9  440.64    5.57
   6   3  -9  410.72    5.42
   6   3  -8   11.38    5.13
   6  -3  -8   27.31    4.76
  -6  -3   8   17.57    5.44
   6   3  -7   -1.88    4.43
   6  -3  -7   11.06    3.78
   6   3  -6   -5.72    4.60
   6  -3  -6    3.41    3.39
   6   3  -5   55.97    7.09
   6  -3  -5   72.44    6.04
   6  -3  -4   12.70    3.42
   6  -3  -4   18.56    4.50
   6   3  -3 1044.27   26.35
   6  -3  -3 1096.51   18.75
   6  -3  -3 1049.13   20.94
   6  -3  -2   10.96    3.11
   6  -3  -2   14.36    4.13
   6  -3  -1   33.53    3.59
   6  -3  -1   33.84    5.08
   6   3  -1   44.08    7.45
   6  -3   0   -0.39    6.63
   6  -3   0   -0.42    2.33
   6  -3   0   -0.81    3.61
   6  -3   1   96.97    4.73
   6  -3   1   92.37   10.04
   6  -3   2   -1.76    5.29
   6  -3   2   -1.49    1.91
   6  -3   2   -1.66    4.58
   6  -3   3  900.87   10.38
   6  -3   3  814.66   19.71
   6  -3   4    0.86    5.23
   6  -3   4    6.84    1.49
   6  -3   4    8.38    4.37
   6  -3   5   29.47    1.72
   6  -3   5    8.53    6.45
   6  -3   5   18.89    5.03
   6  -3   6    5.42    0.99
   6  -3   6    1.68    5.77
   6  -3   6    3.96    3.75
   6  -3   7   45.35    2.23
   6  -3   7   45.85    6.37
   6  -3   8    1.91    2.17
   6  -3   8    2.73    5.02
   6  -3   9   63.60    7.96
   6  -3   9  340.70   15.83
   6  -3  10    3.22    4.57
   6  -3  11   -2.25    6.48
   6  -3  12   -8.21    7.74
   6  -3  13    2.90   10.40
   6  -3  14   -5.76   12.94
   6  -4 -18   16.81    2.98
  -6  -4  17    3.85    8.16
  -6   4  17   -5.46    8.15
   6   4 -17   -2.19    4.29
   6  -4 -17   -0.63    2.23
  -6  -4  16  -10.60    9.45
  -6   4  16    4.03    7.98
   6   4 -16    5.43    4.07
   6  -4 -16    0.61    1.44
  -6  -4  15   -1.14    7.20
  -6   4  15   13.82    8.72
   6   4 -15    0.63    3.59
  -6   4  14   45.85   11.32
   6   4 -14   35.12    4.76
  -6  -4  14   24.34    9.46
  -6  -4  13   -5.40    6.97
  -6   4  13    4.08    8.18
   6   4 -13    8.93    3.62
  -6  -4  12  256.67   16.68
   6   4 -12  241.85    8.61
  -6  -4  11   12.89    6.50
   6  -4 -11    3.77    4.24
   6   4 -11    3.37    2.95
   6   4 -10   18.56    3.08
  -6  -4  10   18.66    6.47
   6  -4 -10   17.57    4.60
  -6  -4   9   -1.05    5.40
   6  -4  -9   -1.72    3.94
   6   4  -9    0.73    2.02
   6   4  -8   71.11    8.92
  -6  -4   8   63.93    8.01
   6  -4  -8   83.64    6.94
   6   4  -7   11.41    4.62
  -6  -4   7    7.52    4.74
   6  -4  -7    2.93    3.36
   6   4  -6  433.86   17.93
   6  -4  -6  487.17   14.42
   6   4  -5   23.74    6.48
   6  -4  -5   15.31    3.83
   6   4  -4    7.58    5.35
   6  -4  -4   17.15    3.86
   6  -4  -4   14.92    4.42
   6   4  -3   -1.07    5.83
   6  -4  -3    3.93    3.19
   6  -4  -3    7.95    3.76
   6  -4  -2  110.31    6.12
   6  -4  -2  101.74    7.85
   6   4  -2  103.55   10.94
   6  -4  -1    9.71    2.84
   6  -4  -1    5.88    4.09
   6  -4   0 1045.11   15.75
   6  -4   0 1075.00   23.19
   6  -4   1   32.10    3.52
   6  -4   1   27.48    5.88
   6  -4   2   72.15    4.11
   6  -4   2   70.06    7.41
   6  -4   3   -0.64    1.92
   6  -4   3   -4.63    4.68
   6  -4   4    0.11   11.16
   6  -4   4   15.93    5.32
   6  -4   5    8.86    9.53
   6  -4   5   -1.07    1.62
   6  -4   5    0.03    4.38
   6  -4   6  417.92    7.04
   6  -4   6  422.47   15.92
   6  -4   7    9.57    2.07
   6  -4   7    4.01    4.59
   6  -4   8   40.93    3.58
   6  -4   8   40.23    6.98
   6  -4   9    0.79    2.94
   6  -4   9    4.71    6.07
   6  -4  10   22.30    6.27
   6  -4  10   10.97    4.00
   6  -4  11    2.57    4.67
   6  -4  12   21.05    9.26
   6  -4  13   16.30    7.97
  -6   5  16   -8.68    9.17
   6   5 -16   -2.97    4.14
  -6  -5  15   64.08   10.43
   6   5 -15   74.11    6.16
  -6  -5  14   -2.18    7.83
   6   5 -14   10.41    4.02
  -6  -5  13    7.92    7.34
  -6   5  13   -9.26   10.42
   6   5 -13    5.14    3.59
  -6  -5  12   -6.08    7.44
  -6   5  12   -4.70    9.87
   6   5 -12   -1.60    3.55
  -6  -5  11   53.68    9.24
   6   5 -11   63.97    5.10
  -6  -5  10   14.64    6.55
   6  -5 -10    4.33    4.16
   6   5 -10    3.48    2.88
  -6  -5   9  285.54   15.74
   6  -5  -9  314.35   13.15
   6   5  -9  293.85    7.23
  -6  -5   8    1.25    5.88
   6  -5  -8   -0.98    3.90
   6   5  -8    2.15    1.44
   6   5  -7   25.16    6.63
   6  -5  -7   36.13    5.47
  -6  -5   7   22.56    5.34
   6   5  -6   -4.42    5.43
   6  -5  -6   -3.61    3.72
   6   5  -5   97.53   10.25
   6  -5  -5  111.82    7.32
   6   5  -4    2.60    6.26
   6  -5  -4    3.78    3.29
   6  -5  -4    1.14    4.58
   6   5  -3  587.42   23.80
   6  -5  -3  590.27   14.35
   6  -5  -3  646.92   19.13
   6  -5  -2   30.15    4.19
   6  -5  -2   18.96    5.47
   6  -5  -1   50.47    4.67
   6  -5  -1   41.76    5.88
   6  -5   0    3.60    2.66
   6  -5   0   10.59    5.12
   6  -5   1   61.59    4.43
   6  -5   1   67.53    7.42
   6  -5   2    7.00    2.92
   6  -5   2    7.71    5.03
   6  -5   3  523.49   10.72
   6  -5   3  523.53   18.24
   6  -5   4   24.44    2.94
   6  -5   4   23.69    5.91
   6  -5   5   36.99    3.10
   6  -5   5   31.33    6.57
   6  -5   6    3.28    5.31
   6  -5   6    0.21    2.06
   6  -5   7   22.06    2.88
   6  -5   7    4.05    4.38
   6  -5   8    7.51    2.80
   6  -5   8    2.74    5.38
   6  -5   9  249.69    8.43
   6  -5   9  237.63   14.46
   6  -5  10   11.31    5.57
   6  -5  10    6.54    3.61
   6  -5  11   20.17    5.11
   6  -5  12   -3.86    5.67
   6  -5  13    3.72    6.20
  -6  -6  15    5.91    8.78
  -6   6  15   13.20    8.39
   6   6 -15   -2.37    3.94
  -6  -6  14   20.74    9.34
  -6   6  14   34.59   12.68
   6   6 -14   21.65    4.63
  -6  -6  13   -8.77    8.28
  -6   6  13   10.02   11.29
   6   6 -13    3.37    3.87
  -6  -6  12  117.39   11.97
   6   6 -12  123.97    7.22
  -6  -6  11   16.65    8.02
   6   6 -11    6.94    3.21
  -6  -6  10    8.87    6.04
   6  -6 -10   17.15    4.90
   6   6 -10   12.94    3.35
  -6  -6   9   -2.56    6.15
   6  -6  -9    2.09    4.02
   6   6  -9    8.87    2.90
   6  -6  -8   63.38    6.65
   6   6  -8   57.76    3.19
  -6  -6   7    8.20    5.83
   6  -6  -7    0.08    3.80
   6   6  -6  302.15   18.13
  -6  -6   6  296.15   14.36
   6  -6  -6  337.85   12.92
   6   6  -5   36.59    8.83
   6  -6  -5   31.88    5.15
   6   6  -4   31.15    8.61
   6  -6  -4   37.41    4.90
   6  -6  -4   20.79    5.54
   6  -6  -3    0.18    3.29
   6  -6  -3    2.36    4.89
   6   6  -3   -4.69    7.13
   6  -6  -2   98.14    6.78
   6  -6  -2   94.54    8.91
   6  -6  -1    7.92    3.61
   6  -6  -1    3.41    4.81
   6  -6   0  387.41   11.44
   6  -6   0  417.31   16.54
   6  -6   1   33.18    4.22
   6  -6   1   31.34    6.67
   6  -6   2   30.62    3.94
   6  -6   2   34.61    6.88
   6  -6   3   -3.12    3.00
   6  -6   3   -5.66    5.48
   6  -6   4   58.51    4.60
   6  -6   4   52.62    7.54
   6  -6   5   12.28    3.08
   6  -6   5   18.59    5.93
   6  -6   6  267.54    8.34
   6  -6   6  271.08   14.59
   6  -6   7   10.85    3.00
   6  -6   7   20.46    6.19
   6  -6   8   37.95    4.19
   6  -6   8   28.21    7.13
   6  -6   9   -2.63    3.21
   6  -6   9    2.34    5.99
   6  -6  10   17.39    4.66
   6  -6  10   13.03    7.15
   6  -6  11   -9.22    5.00
   6  -6  12   67.90    7.64
  -6  -7  14    7.40    9.26
  -6   7  14   -1.24    9.29
   6   7 -14    1.42    4.37
  -6  -7  13   16.34    9.26
  -6   7  13   -1.24    9.90
   6   7 -13    4.98    4.39
  -6  -7  12    3.62    7.00
   6   7 -12    3.22    3.97
   6   7 -11   43.64    5.19
  -6  -7  11   36.90    8.90
  -6  -7  10    6.00    6.94
   6   7 -10   11.89    3.43
  -6  -7   9  148.59   13.10
   6  -7  -9  168.34   10.65
   6   7  -9  136.85    6.03
  -6  -7   8   13.24    7.27
   6   7  -8    9.02    2.51
  -6  -7   7   -0.48    5.42
   6  -7  -7    3.72    4.64
  -6  -7   6   -1.16    5.37
   6  -7  -6    7.30    4.37
  -6  -7   5   38.29    6.58
   6  -7  -5   37.39    5.34
   6  -7  -5   41.91    7.83
   6  -7  -4   18.46    4.86
   6  -7  -4   15.97    5.95
   6  -7  -3  364.62   13.29
   6  -7  -3  374.73   16.54
   6   7  -3  367.14   22.96
   6  -7  -2   29.70    4.92
   6  -7  -2   33.18    6.56
   6  -7  -1   35.36    5.18
   6  -7  -1   26.22    6.07
   6  -7   0    3.03    3.47
   6  -7   0   -0.43    5.53
   6  -7   1   54.45    5.68
   6  -7   1   42.83    7.25
   6  -7   2    6.04    3.42
   6  -7   2    4.66    4.89
   6  -7   3  284.06   10.07
   6  -7   3  281.91   15.27
   6  -7   4   30.68    4.21
   6  -7   4   10.62    5.57
   6  -7   5   35.70    4.50
   6  -7   5   40.57    7.48
   6  -7   6    1.20    5.53
   6  -7   6    2.90    3.24
   6  -7   7   22.79    4.13
   6  -7   7   18.33    5.64
   6  -7   8    4.79    3.64
   6  -7   8   -6.55    6.34
   6  -7   9   99.54    7.11
   6  -7   9   90.96   11.01
   6  -7  10   13.43    4.62
   6  -7  10   25.42    8.51
  -6   8  13   16.34   11.87
   6   8 -12   55.79    6.08
  -6  -8  12   67.50   10.39
  -6  -8  11   12.33    8.70
   6   8 -11    3.89    3.79
  -6  -8  10   18.11    7.99
   6   8 -10   11.04    3.67
  -6  -8   9    4.48    6.78
   6   8  -9   -1.50    3.26
   6  -8  -8   33.87    6.19
   6   8  -8   21.00    3.00
  -6  -8   7   11.35    6.58
   6  -8  -7    7.50    4.76
  -6  -8   6  131.62   11.66
   6  -8  -6  160.19   10.24
   6  -8  -6  159.64   12.64
  -6  -8   5   11.39    5.65
   6  -8  -5   16.17    5.38
   6  -8  -5   14.40    6.68
  -6  -8   4   10.69    5.47
   6  -8  -4   13.64    4.68
   6  -8  -4   22.71    6.72
   6  -8  -3    6.84    3.89
   6  -8  -3    2.93    5.75
   6  -8  -2   51.29    6.14
   6  -8  -2   51.31    8.57
   6  -8  -1   13.86    4.69
   6  -8  -1   17.06    6.94
   6  -8   0  233.54   10.97
   6  -8   0  298.05   16.05
   6  -8   1   13.80    4.20
   6  -8   1   21.02    7.50
   6  -8   2   25.94    4.97
   6  -8   2   31.65    7.41
   6  -8   3    3.20    3.88
   6  -8   3    2.26    6.11
   6  -8   4   22.67    4.74
   6  -8   4   18.93    6.52
   6  -8   5    2.08    3.33
   6  -8   5   -1.42    6.56
   6  -8   6  140.91    8.24
   6  -8   6  120.26   11.80
   6  -8   7   17.96    4.49
   6  -8   7    7.69    6.46
   6  -8   8   20.72    5.65
   6  -8   8    5.11    6.79
   6  -8   9   -0.24    4.23
   6  -8   9    6.39    7.58
   6   9 -11   20.76    4.64
  -6  -9  10    4.65    8.01
   6   9 -10    2.88    3.50
  -6  -9   9   93.93   11.84
   6   9  -9   43.57    4.04
  -6  -9   8   -3.60    8.35
   6   9  -8    1.66    1.82
  -6  -9   7   13.37    7.89
   6  -9  -7   15.51    5.11
   6  -9  -7   21.21    6.95
  -6  -9   6    2.45    6.02
   6  -9  -6   -0.42    4.64
   6  -9  -6   -1.29    5.75
  -6  -9   5   11.22    6.09
   6  -9  -5   22.32    5.49
   6  -9  -5   22.22    5.90
  -6  -9   4   21.97    7.17
   6  -9  -4    6.52    4.56
   6  -9  -4    8.37    6.05
  -6  -9   3  120.90   10.80
   6  -9  -3  144.77   10.43
   6  -9  -2   31.67    6.06
   6  -9  -2   13.26    6.09
   6  -9  -1    8.26    4.75
   6  -9  -1   27.86    7.53
   6  -9   0    4.08    4.62
   6  -9   0   -1.53    5.48
   6  -9   1   16.71    5.09
   6  -9   1   23.29    8.71
   6  -9   2    5.10    4.13
   6  -9   2    8.20    6.64
   6  -9   3  115.01    8.40
   6  -9   3  122.21   11.35
   6  -9   4    2.56    4.15
   6  -9   4    5.31    6.30
   6  -9   5    9.86    6.48
   6  -9   5   11.20    4.67
   6  -9   6    1.48    4.20
   6  -9   6    2.80    6.83
   6  -9   7    8.66    4.93
   6  -9   7    1.93    5.85
   6  10  -9    3.95    2.26
   6 -10  -8   -1.59    7.41
  -6 -10   7    5.60    7.97
   6 -10  -7    8.12    6.71
   6 -10  -6   56.80    8.02
  -6 -10   6   52.62    8.99
   6 -10  -6   66.98    9.74
  -6 -10   5    2.33    6.71
   6 -10  -5    4.22    5.29
   6 -10  -5    0.83    6.78
  -6 -10   4   11.32    7.73
   6 -10  -4   13.61    6.32
   6 -10  -4   17.77    7.04
  -6 -10   3   -4.11    6.19
   6 -10  -3    3.46    5.13
   6 -10  -3    0.46    6.10
  -6 -10   2   24.98    7.29
   6 -10  -2   19.41    6.00
   6 -10  -2   23.66    7.80
   6 -10  -1    2.60    4.68
   6 -10  -1   -1.07    6.52
   6 -10   0   77.57    8.03
   6 -10   0   93.91   11.76
   6 -10   1    6.67    5.59
   6 -10   1   11.23    7.37
   6 -10   2   24.41    5.84
   6 -10   2   16.16    8.03
   6 -10   3    8.30    5.14
   6 -10   3   -4.74    6.68
   6 -10   4   22.39    8.09
   6 -10   4   15.13    5.55
   6 -11  -4   15.11    6.69
   6 -11  -3   32.28    6.73
  -6 -11   2    5.12    6.90
   6 -11  -2    7.88    6.22
  -6 -11   1    0.64    7.61
  -7   0  17   65.31   12.30
  -7   0  16    3.25    8.70
  -7   0  15    9.73    8.53
  -7   0  14   10.00    8.72
  -7   0  13   25.42    7.97
   7   0 -11  309.85   14.65
   7   0 -10    0.06    4.06
   7   0  -9   17.60    5.32
   7   0  -8   -8.25    4.59
   7   0  -7   71.77    6.97
   7   0  -7   76.34    5.71
   7   0  -6    0.08    4.01
   7   0  -6    0.34    2.81
   7   0  -5  719.39   19.46
   7   0  -5  678.25   15.16
   7   0  -4   -0.61    4.05
   7   0  -4    0.47    2.82
   7   0  -3   26.17    5.08
   7   0  -3   27.12    4.06
   7   0  -2   -1.89    4.52
   7   0  -2    4.27    3.40
   7   0  -1  248.12   10.91
   7   0  -1  244.28    9.81
   7   0   0   -1.47    4.13
   7   0   0    3.62    3.58
   7   0   1  889.04   18.58
   7   0   1  914.17   15.34
   7   0   1  889.88   19.06
   7   0   2   -0.84    3.69
   7   0   2    3.07    2.11
   7   0   2    0.28    3.16
   7   0   3    6.53    2.22
   7   0   3   12.43    3.98
   7   0   3   10.23    4.22
   7   0   4    0.61    1.75
   7   0   4    1.76    3.91
   7   0   4   -1.92    3.83
   7   0   5   53.64    2.88
   7   0   5   51.07    6.40
   7   0   6    0.83    1.67
   7   0   7  432.11    7.59
   7   0   8    0.96    2.13
   7   0   9   15.47    2.93
  -7  -1  17    7.59    9.06
  -7   1  17    1.08    9.29
   7   1 -17   -0.01    2.32
  -7  -1  16   13.37    8.88
  -7   1  16   18.85   10.57
   7   1 -16    9.12    1.70
  -7  -1  15   -4.46    7.65
  -7   1  15   16.64    9.82
  -7  -1  14  101.41   13.22
  -7   1  14   96.56   12.53
  -7  -1  13    4.72    6.93
  -7   1  13    6.10    8.60
  -7  -1  12    9.14    7.24
   7   1 -11    3.90    4.64
   7  -1 -11    3.58    4.73
   7   1 -10   80.23    8.29
   7  -1 -10   94.13    8.20
   7   1  -9   -4.62    4.04
   7  -1  -9    8.02    4.42
   7   1  -8  503.55   17.39
   7  -1  -8  519.51   16.87
   7   1  -7    6.49    5.00
   7  -1  -7   17.26    4.57
   7   1  -6    8.06    4.92
   7  -1  -6   10.03    4.19
   7  -1  -6    4.33    3.31
   7   1  -5    1.28    4.32
   7  -1  -5   -3.29    3.59
   7  -1  -5    2.65    3.28
   7   1  -5   -2.04    2.56
   7   1  -4   69.58    7.45
   7  -1  -4   63.68    6.07
   7  -1  -4   70.06    6.10
   7   1  -4   73.37    5.37
   7   1  -3   11.83    4.81
   7  -1  -3    3.25    3.52
   7  -1  -3    7.08    3.55
   7   1  -3    8.49    3.04
   7   1  -2  913.26   22.03
   7  -1  -2  923.07   18.52
   7  -1  -2  943.84   19.59
   7   1  -2  892.20   16.57
   7   1  -1   -3.50    4.61
   7  -1  -1    0.06    3.35
   7  -1  -1    1.73    3.57
   7   1  -1    0.12    3.06
   7   1   0   37.09    5.95
   7  -1   0   21.48    4.40
   7  -1   0   30.50    4.74
   7   1   0   33.33    4.26
   7   1   1    1.58    4.72
   7  -1   1   -0.11    2.99
   7  -1   1   -1.87    2.90
   7  -1   1   -2.72    3.77
   7   1   1    4.95    3.18
   7   1   2   67.13    7.48
   7  -1   2   62.05    4.90
   7  -1   2   59.41    4.01
   7  -1   2   67.86    6.64
   7   1   2   68.72    6.41
   7  -1   3    2.62    2.03
   7  -1   3    3.17    2.68
   7  -1   3   -2.59    3.52
   7   1   3   -0.42    3.56
   7  -1   4  558.59    7.37
   7  -1   4  504.73   16.50
   7   1   4  559.40   17.03
   7  -1   5   -2.52    1.96
   7  -1   5    0.45    1.03
   7  -1   5   -5.91    4.87
   7  -1   6   28.08    5.70
   7  -1   7    2.10    4.72
   7  -1  11    1.35    2.56
   7   2 -17   40.92    3.90
  -7   2  17   37.39   11.17
  -7  -2  16    2.31    8.72
  -7   2  16   -8.41    9.33
   7   2 -16   -1.12    2.47
  -7  -2  15   -3.58    9.07
  -7   2  15   12.89   10.23
   7   2 -15   -0.06    1.73
  -7  -2  14    3.09    8.01
  -7   2  14    9.91    8.29
  -7  -2  13   32.86    8.73
  -7   2  13   40.20   10.26
  -7  -2  12   -3.25    7.17
  -7  -2  11  210.43   14.73
   7  -2 -11  236.96   12.95
   7   2 -10    2.52    4.44
   7  -2 -10    1.44    3.95
   7  -2  -9   19.04    5.47
   7   2  -9   26.36    5.98
   7   2  -8    1.95    4.57
   7  -2  -8   -1.03    3.92
   7   2  -7  108.21    9.76
   7  -2  -7  102.36    7.62
   7   2  -6    1.76    5.70
   7  -2  -6    2.31    3.87
   7  -2  -6    1.64    3.63
   7   2  -5  531.77   18.98
   7  -2  -5  558.88   15.45
   7  -2  -5  568.30   15.99
   7   2  -4    3.95    4.40
   7  -2  -4   10.48    4.06
   7  -2  -4    3.22    3.62
   7   2  -3   11.51    5.46
   7  -2  -3   17.67    4.23
   7  -2  -3    8.18    4.00
   7   2  -2   -0.45    4.86
   7  -2  -2   -1.32    3.19
   7  -2  -2    1.97    3.35
   7   2  -1   71.38    8.01
   7  -2  -1   58.43    5.04
   7  -2  -1   60.39    6.32
   7  -2   0    1.09    2.86
   7  -2   0   -3.12    4.10
   7  -2   1  789.06   13.74
   7  -2   1  772.41   16.99
   7  -2   1  797.28   19.44
   7   2   1  735.50   22.67
   7  -2   2    6.30    2.43
   7  -2   2    7.24    3.36
   7  -2   3   41.23    2.98
   7  -2   3   38.58    3.31
   7  -2   3   41.01    5.98
   7  -2   4    2.73    1.52
   7  -2   4    2.24    1.48
   7  -2   4    6.31    4.36
   7  -2   5   37.22    6.19
   7  -2   6   -1.71    4.73
   7  -2   7  367.58   16.38
   7  -2   8   11.75    5.91
   7   3 -17    4.67    2.97
  -7  -3  16   16.82    9.05
  -7   3  16   28.28   10.72
   7   3 -16   14.88    3.04
  -7  -3  15    6.88    8.78
  -7   3  15   11.18    9.67
   7   3 -15   -0.12    2.44
  -7  -3  14  116.94   14.26
  -7   3  14  113.53   14.79
  -7  -3  13   -4.15    7.05
  -7  -3  12    9.80    7.09
   7  -3 -11    3.11    4.13
  -7  -3  11   -1.16    7.03
   7  -3 -10   62.02    6.99
   7   3  -9   -3.57    5.20
   7  -3  -9    3.42    3.85
   7   3  -8  344.33   17.32
   7  -3  -8  387.13   14.42
   7   3  -7   10.15    4.86
   7  -3  -7    4.20    4.29
   7   3  -6   13.52    5.18
   7  -3  -6   28.49    4.82
   7  -3  -6   28.75    5.67
   7   3  -5   10.27    4.88
   7  -3  -5    0.20    3.50
   7  -3  -5    4.00    4.47
   7   3  -4  102.48    9.91
   7  -3  -4   97.48    6.81
   7   3  -3   -1.25    5.68
   7  -3  -3   -0.61    3.20
   7  -3  -3   -4.81    4.92
   7   3  -2  636.49   22.16
   7  -3  -2  616.94   14.43
   7  -3  -1   28.68    4.05
   7  -3  -1   30.70    5.67
   7  -3   0   54.42    4.49
   7  -3   0   54.46    7.26
   7   3   0   36.73    7.73
   7  -3   1    0.85    2.53
   7  -3   1   -4.95    5.10
   7  -3   2   71.26    4.02
   7  -3   2   55.05    6.31
   7  -3   2   69.98    7.29
   7  -3   3    4.64    2.03
   7  -3   3   13.05    4.00
   7  -3   3   10.64    4.65
   7  -3   4  530.17    7.00
   7  -3   4  488.09   10.30
   7  -3   4  476.85   17.33
   7  -3   5    8.02    1.44
   7  -3   5    1.20    4.56
   7  -3   6   25.07    6.14
   7  -3   7   -4.30    5.13
   7  -3   8    8.32    5.57
   7  -3   9   -3.99    5.73
  -7  -4  16  -13.99    8.67
  -7   4  16   -3.62    9.82
   7   4 -16    0.59    3.02
  -7  -4  15   11.29    9.02
  -7   4  15   15.20    8.83
   7   4 -15    4.69    2.79
  -7  -4  14  -13.54    8.50
   7   4 -14   -1.50    2.10
  -7  -4  13   42.86    8.33
  -7  -4  12    3.61    6.81
  -7  -4  11  111.54   11.63
   7  -4 -11  176.74   11.00
  -7  -4  10    2.01    6.59
   7  -4 -10   12.09    4.54
   7  -4  -9    8.89    4.24
   7   4  -8   -1.85    5.25
   7  -4  -8    6.04    4.01
   7   4  -7   58.94    8.47
   7  -4  -7   75.58    7.02
   7   4  -6    8.50    5.68
   7  -4  -6    6.63    3.76
   7  -4  -6    4.96    5.22
   7   4  -5  391.05   18.59
   7  -4  -5  414.11   13.61
   7  -4  -5  416.31   15.95
   7   4  -4    5.79    6.96
   7  -4  -4   14.89    4.08
   7  -4  -4    6.05    5.11
   7   4  -3   17.82    6.91
   7  -4  -3   14.71    3.75
   7  -4  -3   30.20    5.99
   7  -4  -2   -1.19    3.20
   7  -4  -2    3.94    4.49
   7  -4  -1  120.80    6.43
   7  -4  -1  121.29    9.37
   7   4  -1  146.45   13.18
   7  -4   0    2.41    2.84
   7  -4   0    5.18    5.69
   7  -4   1  557.55   11.53
   7  -4   1  554.28   19.30
   7  -4   2   25.66    3.12
   7  -4   2   24.13    6.02
   7  -4   3   17.25    2.49
   7  -4   3   23.38    6.19
   7  -4   4    0.98    1.96
   7  -4   4    5.42    4.86
   7  -4   5   33.60    2.41
   7  -4   5   22.50    5.85
   7  -4   5   37.69    6.44
   7  -4   6    0.70    1.28
   7  -4   6   -3.37    3.29
   7  -4   6    1.99    4.69
   7  -4   7  234.66   14.17
   7  -4   8   17.63    6.88
   7  -4   9   30.65    7.64
  -7  -5  15    8.17    9.34
  -7   5  15   -2.84    9.73
   7   5 -15   -0.21    2.76
   7   5 -14   38.07    3.04
  -7  -5  14   40.26    9.70
  -7   5  14   51.09   12.47
  -7  -5  13    2.43    7.99
  -7  -5  12    7.41    7.37
  -7  -5  11    5.88    7.18
   7  -5 -11    0.35    4.46
  -7  -5  10   57.23    9.26
   7  -5 -10   68.11    7.29
  -7  -5   9    7.67    6.52
   7  -5  -9    6.85    4.96
   7  -5  -8  305.00   13.14
   7   5  -7   18.44    7.31
   7  -5  -7   24.21    5.17
   7   5  -6    5.07    5.84
   7  -5  -6   12.15    4.17
   7  -5  -6    8.89    5.37
   7   5  -5   -6.16    7.36
   7  -5  -5    3.14    3.58
   7  -5  -5    4.08    5.05
   7   5  -4   37.20    8.42
   7  -5  -4   39.49    5.17
   7  -5  -4   42.46    7.05
   7   5  -3   26.99    8.77
   7  -5  -3   13.08    3.87
   7  -5  -3   18.28    5.80
   7   5  -2  380.64   20.06
   7  -5  -2  428.18   12.46
   7  -5  -2  418.52   16.77
   7  -5  -1   24.96    4.07
   7  -5  -1   11.39    5.09
   7   5  -1    5.66    8.48
   7  -5   0   24.35    3.92
   7  -5   0   15.47    5.07
   7  -5   1   -1.10    3.03
   7  -5   1    6.74    5.22
   7  -5   2   56.48    4.37
   7  -5   2   61.00    8.36
   7  -5   3    5.18    2.53
   7  -5   3   -0.50    5.18
   7  -5   4  273.15    7.35
   7  -5   4  281.37   14.80
   7  -5   5   13.47    2.43
   7  -5   5   16.80    6.03
   7  -5   6   26.32    2.75
   7  -5   6   20.97    5.69
   7  -5   7    1.11    2.19
   7  -5   7   -0.82    6.20
   7  -5   8   33.91    3.22
   7  -5   8   32.23    7.59
   7  -5   9   -2.07    2.37
   7  -5   9    6.14    4.87
   7  -5  10  136.04   13.09
  -7   6  15    6.98   11.63
  -7  -6  14    4.60    9.27
   7   6 -14   -0.81    2.27
  -7  -6  13   19.57    9.74
  -7  -6  12    4.55    7.43
  -7  -6  11   85.70   11.23
  -7  -6  10   16.57    8.13
   7  -6 -10   10.23    5.93
   7  -6  -9   23.32    5.95
  -7  -6   9    2.22    5.91
   7  -6  -8    0.03    4.23
   7  -6  -7   65.02    7.32
   7   6  -6    6.70    9.05
   7  -6  -6    1.80    4.21
   7  -6  -6    0.46    5.79
   7  -6  -5  306.74   12.54
   7  -6  -5  336.78   16.25
   7   6  -4    5.80    7.59
   7  -6  -4   25.35    4.89
   7  -6  -4   15.36    6.23
   7  -6  -3   18.68    4.27
   7  -6  -3   17.76    5.76
   7  -6  -2    6.65    3.83
   7  -6  -2    0.40    5.12
   7   6  -2   -3.87    7.90
   7  -6  -1   30.47    4.30
   7  -6  -1   51.24    8.06
   7   6  -1   46.84   11.27
   7  -6   0    1.18    3.18
   7  -6   0    0.61    6.06
   7  -6   1  322.38   10.48
   7  -6   1  342.52   17.44
   7  -6   2   13.67    3.79
   7  -6   2    5.99    6.30
   7  -6   3   40.29    4.45
   7  -6   3   38.37    7.85
   7  -6   4    2.95    2.85
   7  -6   4   -2.73    6.09
   7  -6   5   23.22    3.47
   7  -6   5   21.88    6.84
   7  -6   6   -0.24    2.55
   7  -6   6    3.11    6.09
   7  -6   7  159.66    6.55
   7  -6   7  157.53   12.71
   7  -6   8   11.89    3.06
   7  -6   8    7.24    6.81
   7  -6   9   23.86    4.28
   7  -6   9    4.56    6.69
   7  -6  10    1.45    3.54
  -7  -7  12   -1.51    8.56
  -7  -7  11   -8.81    7.78
  -7  -7  10    6.95    6.92
  -7  -7   9   -2.16    7.63
   7  -7  -9    5.38    5.30
  -7  -7   8   85.32   10.99
   7  -7  -8  109.09    9.45
   7  -7  -7    6.08    4.45
   7  -7  -7    6.14    6.80
   7  -7  -6   40.65    6.17
   7  -7  -6   30.16    7.28
   7  -7  -5    5.53    4.47
   7  -7  -5   -1.11    5.73
   7   7  -4   36.89    9.64
   7  -7  -4   49.41    6.15
   7  -7  -4   59.39    9.11
   7   7  -3    5.09    8.60
   7  -7  -3   -1.25    3.95
   7  -7  -3    3.59    6.16
   7  -7  -2  201.12    9.92
   7  -7  -2  225.99   14.30
   7   7  -2  207.39   19.40
   7  -7  -1   23.85    4.59
   7  -7  -1   33.63    6.98
   7  -7   0   26.81    4.89
   7  -7   0   26.90    7.36
   7  -7   1    4.19    4.37
   7  -7   1   -2.49    6.25
   7  -7   2   41.90    5.08
   7  -7   2   57.24    9.05
   7  -7   3    3.34    3.61
   7  -7   3    2.06    6.13
   7  -7   4  209.20    8.60
   7  -7   4  208.34   14.20
   7  -7   5   10.53    3.66
   7  -7   5   12.56    6.19
   7  -7   6   14.05    3.51
   7  -7   6   14.80    7.01
   7  -7   7    8.59    3.67
   7  -7   7    4.71    6.56
   7  -7   8    2.77    3.57
   7  -7   8    6.88    8.11
  -7  -8  11   36.03    9.82
  -7  -8  10    1.20    7.81
  -7  -8   9    2.11    7.73
   7  -8  -9   15.44    6.09
  -7  -8   8   15.50    8.39
   7  -8  -8    4.09    4.82
   7  -8  -8   -0.57    6.76
   7  -8  -7   38.18    6.71
  -7  -8   7   20.24    7.02
   7  -8  -7   32.41    8.15
   7  -8  -6    2.42    4.76
   7  -8  -6    4.99    6.63
   7  -8  -5  125.29    9.47
   7  -8  -5  120.50   11.86
   7  -8  -4    6.30    4.65
   7  -8  -4    2.46    6.45
   7  -8  -3   11.19    4.94
   7  -8  -3   16.32    6.95
   7  -8  -2   -5.22    4.62
   7  -8  -2   -1.87    5.99
   7  -8  -1   41.41    6.04
   7  -8  -1   37.65    8.48
   7   8  -1   47.69   14.07
   7  -8   0    2.21    3.98
   7  -8   0    6.71    8.09
   7  -8   1  141.08    8.62
   7  -8   1  180.38   14.28
   7  -8   2   18.84    4.69
   7  -8   2   26.98    8.59
   7  -8   3   27.06    5.06
   7  -8   3   24.04    7.70
   7  -8   4   -5.65    4.36
   7  -8   4   -0.73    6.93
   7  -8   5    3.69    7.60
   7  -8   5    3.46    4.09
   7  -8   6    7.35    4.19
   7  -8   6    1.38    7.20
   7  -9  -8   70.41    8.38
  -7  -9   8   43.60    9.80
   7  -9  -8   67.19   11.52
  -7  -9   7    0.21    7.38
   7  -9  -7    3.66    5.19
   7  -9  -7   19.47    7.83
  -7  -9   6   18.94    7.48
   7  -9  -6   -0.03    4.89
   7  -9  -6    7.43    6.52
   7  -9  -5    7.98    5.68
   7  -9  -5   -0.83    7.09
   7  -9  -4   22.94    6.35
   7  -9  -4   19.52    7.51
   7  -9  -3   -1.55    5.12
   7  -9  -3   -6.03    6.92
   7  -9  -2   88.74    8.46
   7  -9  -2   95.30   11.86
   7  -9  -1   12.90    5.34
   7  -9  -1   14.42    6.98
   7  -9   0   17.37    5.53
   7  -9   0   15.71    8.66
   7  -9   1   -3.28    4.43
   7  -9   1   -6.71    7.15
   7  -9   2    6.75    4.41
   7  -9   2   23.69    8.04
   7  -9   3   -1.97    4.30
   7  -9   3   13.54    7.63
   7 -10  -6  -10.10    6.85
   7 -10  -5   42.95    8.01
  -7 -10   5   44.02   10.14
   7 -10  -4   10.77    5.75
   7 -10  -3   16.67    6.78
   7 -10  -2    8.62    5.34
  -8   0  16   69.64   12.46
  -8   0  15   17.94    9.23
   8   0 -11   -4.82    4.83
   8   0 -10  210.52   12.55
   8   0  -9   -4.38    5.07
   8   0  -8    9.65    4.96
   8   0  -7    3.30    4.50
   8   0  -6   53.40    7.09
   8   0  -5   -0.30    4.35
   8   0  -4  551.72   18.00
   8   0  -4  602.37   16.53
   8   0  -3    4.12    4.94
   8   0  -3   -0.43    3.64
   8   0  -2   16.50    4.98
   8   0  -2    9.90    3.76
   8   0  -1   -0.16    4.21
   8   0  -1    2.39    4.08
   8   0   0   65.97    7.19
   8   0   0   34.87    5.52
   8   0   1    0.84    4.04
   8   0   1   -3.14    4.05
   8   0   2  513.34   14.95
   8   0   2  464.11   15.83
   8   0   3    2.18    3.95
   8   0   3   -6.98    5.20
   8   0   4   24.50    4.70
   8   0   4   28.72    6.19
   8   0   5    1.24    5.06
   8   0   5    0.67    3.74
   8   0   5   -1.45    1.94
   8   0   6   30.86    4.47
   8   0   6   15.31    2.27
   8   0   7    4.93    3.17
   8   0   7   -1.26    1.90
   8   0   8  172.76    6.13
   8   0   8  167.36    4.14
  -8  -1  16    7.82    8.79
  -8   1  16   -7.93   10.82
  -8  -1  15   32.50   10.93
  -8   1  15   27.94   10.34
  -8  -1  14   16.34    9.17
   8   1 -11    6.53    5.50
   8  -1 -11   10.94    5.29
   8   1 -10    0.36    5.67
   8  -1 -10    6.74    5.01
   8   1  -9   68.75    8.14
   8  -1  -9   56.94    7.37
   8   1  -8   -1.28    4.77
   8  -1  -8   -0.50    4.56
   8  -1  -8    1.43    4.29
   8   1  -7  358.26   16.11
   8  -1  -7  360.92   14.79
   8  -1  -7  350.22   13.07
   8   1  -6   -3.71    4.85
   8  -1  -6    3.50    4.17
   8  -1  -6    3.87    4.05
   8   1  -5   14.53    5.47
   8  -1  -5   11.02    4.16
   8  -1  -5   15.71    4.60
   8   1  -4    9.06    5.93
   8  -1  -4    0.10    3.93
   8  -1  -4   -1.23    3.94
   8   1  -3   67.18    8.01
   8  -1  -3   75.42    7.01
   8  -1  -3   75.01    7.29
   8   1  -2    5.18    5.29
   8  -1  -2   -0.58    3.62
   8  -1  -2    1.99    4.38
   8   1  -1  499.58   17.49
   8  -1  -1  475.85   13.84
   8  -1  -1  500.83   15.73
   8   1   0    2.36    4.88
   8  -1   0   10.91    3.83
   8  -1   0    4.25    4.06
   8   1   1   17.59    6.16
   8  -1   1   27.12    4.64
   8  -1   1    7.76    4.52
   8   1   2   -0.48    5.32
   8  -1   2    0.28    3.17
   8  -1   2    4.21    5.08
   8   1   3   61.97    7.57
   8  -1   3   65.77    4.61
   8  -1   3   48.20    3.53
   8   1   3   62.55    7.06
   8   1   4    8.63    5.39
   8  -1   4   -2.69    2.35
   8  -1   4    0.27    1.77
   8  -1   4   -0.82    5.22
   8  -1   5  355.07    6.07
   8  -1   5  351.10    5.00
   8  -1   5  329.98   15.60
   8  -1   6   18.23    5.81
   8   1   6   -2.78    6.33
  -8   2  16   39.34   11.84
  -8  -2  15   19.74   10.56
  -8   2  15  -13.06   11.40
  -8  -2  14   18.70    9.85
   8  -2 -11   -0.77    4.73
   8   2 -10  218.23   13.63
   8  -2 -10  209.11   12.49
   8   2  -9   -0.04    4.92
   8  -2  -9    7.96    5.09
   8   2  -8   23.75    6.77
   8  -2  -8   11.59    4.60
   8  -2  -8   19.12    5.64
   8   2  -7   -1.84    5.41
   8  -2  -7   -4.09    5.14
   8  -2  -7    6.79    4.87
   8   2  -6   71.40    8.64
   8  -2  -6   81.16    7.22
   8  -2  -6   84.25    7.63
   8   2  -5    1.03    5.83
   8  -2  -5   -3.21    3.90
   8  -2  -5   -1.35    4.24
   8   2  -4  387.65   17.41
   8  -2  -4  380.13   13.13
   8  -2  -4  395.68   14.69
   8   2  -3   17.18    7.04
   8  -2  -3   11.13    4.25
   8  -2  -3   10.50    4.51
   8   2  -2    7.39    5.19
   8  -2  -2    5.03    3.47
   8  -2  -2    2.89    5.05
   8   2  -1   -3.48    5.41
   8  -2  -1    1.18    3.60
   8  -2  -1    1.73    5.06
   8   2   0   80.71    9.28
   8  -2   0   65.05    5.11
   8  -2   0   83.08    7.72
   8   2   1    7.28    6.02
   8  -2   1   -0.45    3.06
   8  -2   1    3.72    4.82
   8   2   2  476.74   19.44
   8  -2   2  481.95   10.47
   8  -2   2  444.45   16.58
   8  -2   3    3.72    2.28
   8  -2   3    1.64    2.33
   8  -2   3    7.05    5.37
   8   2   3   -1.26    6.31
   8  -2   4   30.96    2.15
   8  -2   4   30.62    2.06
   8  -2   5    2.66    5.01
   8  -2   6   33.87    7.43
   8  -2   7   -3.96    6.09
  -8  -3  15  -18.01   12.02
  -8  -3  14   -7.08    7.94
  -8  -3  13   72.73   10.84
   8  -3 -11   -0.21    4.50
   8  -3 -10    1.77    4.52
   8   3  -9   76.64    9.35
   8  -3  -9   60.90    7.66
   8   3  -8    7.10    5.78
   8  -3  -8   -3.73    4.58
   8  -3  -8   -2.24    5.00
   8   3  -7  319.79   17.46
   8  -3  -7  343.38   14.02
   8  -3  -7  370.70   15.63
   8   3  -6    7.70    5.66
   8  -3  -6   13.44    4.50
   8  -3  -6   10.02    5.23
   8   3  -5   -4.64    7.13
   8  -3  -5    7.51    4.20
   8  -3  -5    7.62    4.40
   8   3  -4    1.03    5.56
   8  -3  -4    1.25    3.46
   8  -3  -4    6.37    4.78
   8   3  -3   44.57    8.05
   8  -3  -3   49.28    5.33
   8  -3  -3   56.59    7.11
   8   3  -2   -1.76    6.57
   8  -3  -2    5.18    3.55
   8  -3  -2    1.99    5.27
   8   3  -1  396.35   18.95
   8  -3  -1  371.90   11.47
   8   3   0   13.63    7.08
   8  -3   0    2.08    3.00
   8  -3   0    7.48    5.75
   8   3   1   25.38    7.85
   8  -3   1   16.44    3.38
   8  -3   1   29.47    5.94
   8  -3   2   -3.33    2.52
   8  -3   2   -3.08    5.59
   8   3   2    3.77    7.02
   8  -3   3   53.79    3.34
   8  -3   3   55.09    4.46
   8  -3   3   48.92    7.04
   8  -3   4    1.15    1.57
   8  -3   4    1.33    1.43
   8  -3   4   -0.17    4.58
   8  -3   5  239.96   14.10
   8  -3   6    8.46    6.41
   8  -3   7   13.32    6.31
   8  -3   8   -4.28    6.34
  -8  -4  14    0.32    8.28
  -8  -4  13   -6.43    8.42
  -8  -4  12   15.68    8.32
   8  -4 -11   -0.92    5.41
   8  -4 -10  131.88    9.87
   8  -4  -9   -1.80    4.52
   8   4  -8    2.44    6.31
   8  -4  -8    0.80    4.64
   8  -4  -8    9.99    5.68
   8   4  -7    3.67    6.11
   8  -4  -7    0.81    4.08
   8  -4  -7   -0.04    5.42
   8   4  -6   39.72    8.24
   8  -4  -6   42.83    6.01
   8   4  -5   17.05    7.35
   8  -4  -5    2.64    4.18
   8  -4  -5    9.37    5.60
   8  -4  -4  355.55   12.76
   8  -4  -4  330.96   15.54
   8   4  -3    8.44    6.95
   8  -4  -3   10.79    3.93
   8  -4  -3    4.60    4.87
   8   4  -2   19.48    7.96
   8  -4  -2    9.35    3.28
   8  -4  -2   18.38    6.39
   8   4  -1   -9.03    6.92
   8  -4  -1    1.99    3.48
   8  -4  -1    2.38    5.93
   8   4   0   37.90    9.14
   8  -4   0   52.32    4.72
   8  -4   0   48.71    7.27
   8  -4   1    2.73    2.85
   8  -4   1   -0.36    4.97
   8   4   1   -7.83    7.67
   8  -4   2  347.05    8.89
   8  -4   2  309.32   15.50
   8  -4   3   11.81    2.62
   8  -4   3    4.14    5.94
   8  -4   4   16.88    2.22
   8  -4   4   10.38    3.25
   8  -4   4   15.53    6.39
   8  -4   5   -2.62    5.19
   8  -4   6    4.97    6.39
   8  -4   7   12.45    6.96
   8  -4   8  125.74   12.30
   8  -4   9   11.24    6.91
  -8  -5  13   65.81   11.83
  -8  -5  12  -10.10    9.57
   8  -5 -11   10.18    5.49
   8  -5 -10   -3.95    5.55
   8  -5  -9   34.87    6.49
   8  -5  -8    4.30    4.24
   8  -5  -8    0.90    6.14
   8  -5  -7  209.44   11.39
   8  -5  -7  186.23   13.22
   8   5  -6    4.50    6.25
   8  -5  -6    0.79    4.33
   8  -5  -6    9.98    5.37
   8   5  -5    9.68    7.96
   8  -5  -5   17.59    4.59
   8  -5  -5   10.23    6.33
   8   5  -4    3.82    7.04
   8  -5  -4    3.67    3.95
   8  -5  -4    6.51    6.29
   8   5  -3   26.74    8.68
   8  -5  -3   30.87    4.45
   8   5  -2    2.98    8.33
   8  -5  -2    2.78    3.50
   8  -5  -2    1.96    5.69
   8   5  -1  285.49   19.73
   8  -5  -1  264.03   10.11
   8  -5  -1  300.20   16.61
   8  -5   0    9.17    3.61
   8  -5   0   19.79    7.30
   8   5   0    9.65    9.90
   8  -5   1   20.38    3.91
   8  -5   1   33.85    8.24
   8  -5   2    2.90    2.72
   8  -5   2   14.22    6.73
   8  -5   3   34.00    3.99
   8  -5   3   45.00    7.92
   8  -5   4    0.97    2.60
   8  -5   4    1.94    5.86
   8  -5   5  204.02    5.48
   8  -5   5  199.29   13.56
   8  -5   6   14.79    6.77
   8  -5   7   14.24    7.67
   8  -5   8   -3.21    7.20
  -8  -6  12  -10.11   10.56
  -8  -6  11   -3.99    7.67
   8  -6 -10   72.36    8.44
   8  -6  -9   16.79    5.89
   8  -6  -9   11.90    6.84
   8  -6  -8   14.11    5.58
   8  -6  -8    4.10    6.82
   8  -6  -7    0.18    4.62
   8  -6  -7  -10.82    6.72
   8   6  -6   56.02   10.60
   8  -6  -6   50.14    6.64
   8  -6  -6   52.53    8.97
   8   6  -5   -1.78    8.79
   8  -6  -5   -0.27    4.11
   8  -6  -5    5.30    6.69
   8   6  -4  129.01   14.49
   8  -6  -4  141.14    9.26
   8   6  -3    6.26    9.22
   8  -6  -3   16.91    4.64
   8  -6  -3   19.81    7.34
   8   6  -2   16.66    9.97
   8  -6  -2    9.79    4.15
   8  -6  -2   13.32    6.77
   8  -6  -1   -1.52    3.92
   8  -6  -1   10.13    6.50
   8   6  -1    5.41    9.19
   8  -6   0   36.90    4.73
   8  -6   0   34.61    8.25
   8   6   0   28.83   11.79
   8  -6   1   15.09    4.05
   8  -6   1    7.39    6.77
   8  -6   2  214.30    8.84
   8  -6   2  223.23   14.68
   8  -6   3    7.60    3.22
   8  -6   3   12.78    6.69
   8  -6   4   17.36    3.26
   8  -6   4   24.51    7.70
   8  -6   5    0.39    2.39
   8  -6   5   -7.92    7.33
   8  -6   6   13.15    2.80
   8  -6   6   16.18    6.57
   8  -6   7   -2.59    1.87
   8  -6   7   -4.42    6.98
  -8  -7  11   -5.93   10.07
  -8  -7  10   -4.74    7.30
   8  -7 -10    1.32    5.24
   8  -7  -9   31.58    6.92
   8  -7  -9   26.86    8.53
   8  -7  -8    2.14    5.07
   8  -7  -8   -1.66    6.87
   8  -7  -7  136.70   10.34
   8  -7  -7  106.56   11.34
   8  -7  -6   19.00    5.60
   8  -7  -6    6.41    6.94
   8  -7  -5    5.40    4.63
   8  -7  -5   14.60    8.42
   8   7  -4    5.74    9.09
   8  -7  -4   -2.34    4.36
   8  -7  -4   -7.11    7.63
   8   7  -3    7.35    9.36
   8  -7  -3   27.38    5.69
   8  -7  -3   19.72    7.41
   8   7  -2   17.47   10.73
   8  -7  -2   10.12    4.78
   8  -7  -2    1.67    7.23
   8   7  -1  187.13   19.46
   8  -7  -1  134.66    8.51
   8  -7  -1  165.70   14.77
   8  -7   0   14.56    4.12
   8  -7   0   22.10    7.95
   8  -7   1   42.15    5.77
   8  -7   1   25.21    9.13
   8  -7   2    1.61    3.67
   8  -7   2   -3.79    7.39
   8  -7   3   20.37    4.34
   8  -7   3   27.66    8.74
   8  -7   4    2.81    3.45
   8  -7   4   -8.95    7.23
   8  -7   5   68.15    5.20
   8  -7   5   39.88    8.92
  -8  -8   9   -3.34    8.19
   8  -8  -9   17.76    6.69
   8  -8  -8   11.58    5.72
   8  -8  -7   -0.14    5.15
   8  -8  -7  -16.11    8.46
   8  -8  -6   17.24    5.60
   8  -8  -6   29.59    8.08
   8  -8  -5    3.66    5.12
   8  -8  -5    3.26    8.13
   8  -8  -4   79.50    8.00
   8  -8  -4  119.55   12.25
   8  -8  -3   21.37    5.69
   8  -8  -3    2.38    7.44
   8  -8  -2   11.28    4.70
   8  -8  -2   11.85    8.84
   8  -8  -1    0.95    4.77
   8  -8  -1  -17.33    9.87
   8   8  -1   -9.89   12.37
   8  -8   0   28.01    5.58
   8  -8   0   34.29   10.00
   8  -8   1    0.85    4.39
   8  -8   1    8.76    8.05
   8  -8   2   86.96    7.38
   8  -8   2   97.72   12.89
   9   0 -11   20.45    6.18
   9   0 -10   -2.40    5.27
   9   0  -9  172.18   12.20
   9   0  -8    1.88    4.95
   9   0  -7   10.22    5.39
   9   0  -6    4.81    5.36
   9   0  -5  100.15    9.18
   9   0  -4   -1.29    5.30
   9   0  -3  293.80   13.78
   9   0  -2    0.57    4.72
   9   0  -1    5.73    5.21
   9   0   0    0.93    4.84
   9   0   1   44.25    6.38
   9   0   2    0.30    4.52
   9   0   3  236.58   10.67
   9   0   4   -2.55    3.84
   9   0   5   13.25    3.67
   9   0   6   -0.21    2.31
   9  -1 -11    4.23    5.32
   9   1 -10    8.12    6.07
   9  -1 -10    8.99    5.51
   9   1  -9   -1.77    5.23
   9  -1  -9   -2.28    5.05
   9   1  -8   50.60    7.61
   9  -1  -8   34.28    6.74
   9   1  -7    4.44    5.67
   9  -1  -7   -1.84    5.25
   9   1  -6  244.09   13.79
   9  -1  -6  266.38   13.78
   9   1  -5    8.59    5.85
   9  -1  -5    8.87    5.24
   9   1  -4    9.04    6.21
   9  -1  -4    4.60    4.32
   9   1  -3   -4.45    5.39
   9  -1  -3    1.24    4.11
   9   1  -2   43.35    7.87
   9  -1  -2   39.96    5.48
   9   1  -1   -1.56    6.04
   9  -1  -1   -0.16    3.90
   9  -1  -1    0.84    5.00
   9  -1   0  276.32   10.90
   9  -1   0  279.06   13.64
   9   1   1   -5.28    5.91
   9  -1   1    2.89    3.52
   9  -1   1   -0.57    4.75
   9   1   2   20.41    6.33
   9  -1   2   18.66    3.85
   9  -1   2   31.86    6.28
   9   1   3   -1.91    5.26
   9  -1   3    8.61    3.45
   9  -1   3   10.31    6.12
   9   1   4   35.22    6.10
   9  -1   4   34.66    3.19
   9  -1   4   28.12    7.59
   9  -1   5    1.21    5.79
   9   1   5    4.61    5.00
   9   1   6  177.30   10.48
   9   1   7    8.20    4.78
   9   1   8   17.10    4.85
   9  -2 -11   37.72    7.31
   9   2 -10   -8.15    6.33
   9  -2 -10    1.97    5.34
   9   2  -9  155.81   12.82
   9  -2  -9  164.37   11.31
   9   2  -8   -9.00    6.39
   9  -2  -8    2.53    4.92
   9  -2  -8   -0.54    5.21
   9   2  -7   20.16    7.02
   9  -2  -7   11.32    5.33
   9  -2  -7   13.24    5.62
   9   2  -6    9.19    6.51
   9  -2  -6   -9.81    5.44
   9  -2  -6    1.34    4.73
   9  -2  -5   32.53    6.05
   9  -2  -5   40.18    6.69
   9   2  -4   -0.46    6.46
   9  -2  -4   11.33    5.33
   9  -2  -4    6.34    5.04
   9   2  -3  262.59   15.45
   9  -2  -3  255.56   11.51
   9  -2  -3  285.57   13.87
   9   2  -2   -3.67    6.53
   9  -2  -2    3.14    4.23
   9  -2  -2    0.45    5.17
   9   2  -1    4.72    6.01
   9  -2  -1   15.12    4.70
   9  -2  -1   12.35    5.73
   9   2   0   -1.21    5.96
   9  -2   0    5.19    3.76
   9  -2   0   -0.54    4.95
   9   2   1   47.32    8.70
   9  -2   1   50.02    5.03
   9  -2   1   56.98    7.69
   9   2   2    0.74    6.93
   9  -2   2    0.46    2.66
   9  -2   2    2.09    4.69
   9  -2   3  246.43    6.70
   9  -2   3  237.06   13.23
   9   2   4   -0.57    6.49
   9  -2   4    5.18    1.19
   9  -2   4    3.52    1.08
   9  -2   4   -2.72    6.10
   9   2   5   11.92    7.46
   9  -2   5   10.82    7.94
   9   2   6   -3.69    7.02
   9  -2   6   11.07    6.86
   9   2   7   12.49    7.61
   9  -3 -11   -4.46    5.44
   9  -3 -11    0.27    5.59
   9  -3 -10    0.07    5.30
   9  -3 -10    4.05    5.89
   9   3  -9    6.71    6.85
   9  -3  -9   -4.08    6.00
   9  -3  -9    5.94    5.07
   9   3  -8   31.09    7.69
   9  -3  -8   24.70    5.78
   9  -3  -8   46.84    7.79
   9   3  -7    4.45    6.60
   9  -3  -7    2.40    5.34
   9  -3  -7    0.18    5.17
   9   3  -6  220.43   15.86
   9  -3  -6  200.82   11.41
   9  -3  -6  215.29   12.96
   9   3  -5   -2.07    6.88
   9  -3  -5    3.00    5.08
   9  -3  -5   11.84    5.97
   9   3  -4   16.72    7.61
   9  -3  -4   10.03    4.23
   9  -3  -4   25.43    6.77
   9   3  -3    2.16    6.05
   9  -3  -3   -4.14    3.73
   9  -3  -3   -0.35    5.87
   9   3  -2   32.39    8.49
   9  -3  -2   43.87    5.59
   9  -3  -2   55.07    8.39
   9   3  -1    6.52    7.28
   9  -3  -1    7.70    3.90
   9  -3  -1   -9.17    6.50
   9   3   0  226.63   15.39
   9  -3   0  265.66    9.57
   9  -3   0  249.25   13.89
   9   3   1    5.38    7.45
   9  -3   1    3.35    2.88
   9  -3   1    5.99    6.35
   9   3   2   19.85    8.41
   9  -3   2   13.48    2.95
   9  -3   2   23.98    6.91
   9   3   3   10.66    7.20
   9  -3   3    3.53    2.31
   9  -3   3   -3.07    5.43
   9   3   4   37.35    9.64
   9  -3   4   19.24    6.62
   9  -3   5    4.05    6.87
   9   3   5   12.90    8.61
   9  -3   6  156.13   13.37
   9   3   6  157.84   15.80
   9  -3   7   13.82    8.16
   9  -4 -11   20.27    6.07
   9  -4 -11   24.64    7.03
   9  -4 -10    2.47    5.64
   9  -4 -10    0.68    6.86
   9  -4  -9  108.27    9.67
   9  -4  -9  121.88   11.01
   9  -4  -8   -4.15    4.94
   9  -4  -8    4.50    5.77
   9   4  -7   15.70    8.96
   9  -4  -7   14.24    5.51
   9  -4  -7   17.61    6.38
   9   4  -6   -1.34    7.04
   9  -4  -6    5.64    4.81
   9  -4  -6   -0.20    5.93
   9   4  -5   52.03   10.17
   9  -4  -5   60.74    6.91
   9  -4  -5   58.22    8.59
   9   4  -4   -4.27    7.63
   9  -4  -4   -0.63    4.24
   9  -4  -4   -0.08    5.92
   9   4  -3  195.59   15.60
   9  -4  -3  181.67    9.40
   9  -4  -3  218.13   14.30
   9   4  -2    4.29    7.72
   9  -4  -2   14.49    4.53
   9  -4  -2   12.99    6.88
   9   4  -1   12.07    8.30
   9  -4  -1    7.29    3.88
   9  -4  -1   16.56    7.43
   9   4   0   -5.09    7.37
   9  -4   0    3.76    3.31
   9  -4   0   -1.17    6.22
   9   4   1   24.36    9.20
   9  -4   1   26.51    3.61
   9  -4   1   23.00    7.14
   9   4   2    9.24    8.19
   9  -4   2    2.73    3.02
   9  -4   2   -5.19    6.98
   9   4   3  158.88   15.91
   9  -4   3  190.36    5.90
   9  -4   3  142.46   12.43
   9  -4   4   13.31    6.27
   9   4   4   11.53   10.21
   9   4   5    2.44   11.11
   9  -4   5   22.37    6.81
   9  -4   6    0.05    7.18
   9  -5 -11   14.93    6.39
   9  -5 -11    0.61    6.51
   9  -5 -10   -3.17    5.56
   9  -5 -10   18.32    8.39
   9  -5  -9    1.30    5.13
   9  -5  -9    3.96    6.66
   9  -5  -8   38.06    6.92
   9  -5  -8   25.69    8.22
   9   5  -7   -1.12    7.49
   9  -5  -7   -5.37    5.58
   9  -5  -7    9.90    6.67
   9   5  -6  137.33   14.41
   9  -5  -6  128.03    9.47
   9  -5  -6  145.12   12.83
   9  -5  -5    9.87    4.84
   9  -5  -5   13.76    7.14
   9   5  -4    7.30    7.86
   9  -5  -4   11.58    4.68
   9  -5  -4    8.58    6.41
   9   5  -3  -11.09    8.82
   9  -5  -3   -5.63    4.18
   9  -5  -3   -7.72    6.66
   9   5  -2   14.29    8.69
   9  -5  -2   26.19    5.12
   9   5  -1    3.86    9.58
   9  -5  -1    1.47    3.78
   9  -5  -1   -5.61    6.81
   9   5   0  129.17   15.33
   9  -5   0  147.75    7.97
   9  -5   0  139.23   12.28
   9   5   1   12.46    8.76
   9  -5   1    2.47    3.17
   9  -5   1    4.83    6.48
   9  -5   2   19.61    3.50
   9  -5   2   23.99    7.77
   9   5   2   28.83   11.96
   9  -5   3   -0.16    2.74
   9  -5   3   -7.93    6.74
   9   5   3    2.13   10.95
   9  -5   4   24.36    2.60
   9  -5   4   29.12    8.22
   9  -5   5   10.84    7.15
   9  -6 -10    4.80    5.91
   9  -6  -9   69.22    8.57
   9  -6  -9   85.95   11.25
   9  -6  -8    2.49    5.66
   9  -6  -8    4.93    7.60
   9  -6  -7   -0.98    5.57
   9  -6  -7   10.51    7.60
   9   6  -6   -6.32    9.03
   9  -6  -6    8.75    5.38
   9  -6  -6    7.49    7.10
   9   6  -5   35.89    9.49
   9  -6  -5   25.73    5.42
   9  -6  -5   30.96    8.46
   9   6  -4   -1.67    8.58
   9  -6  -4    3.47    4.71
   9  -6  -4   -2.49    7.48
   9   6  -3  107.04   13.73
   9  -6  -3  129.29    8.98
   9  -6  -3  138.44   13.41
   9   6  -2   -2.88   10.98
   9  -6  -2    8.56    4.56
   9   6  -1   13.10   10.16
   9  -6  -1   11.26    4.31
   9  -6  -1   19.20    8.29
   9   6   0   12.56   10.22
   9  -6   0   10.48    4.41
   9  -6   0   -5.15    8.30
   9  -6   1   24.57    4.44
   9  -6   1   13.74    7.90
   9  -6   2    1.34    3.56
   9  -6   2    4.14    6.95
   9   6   2   17.06   12.13
   9  -6   3  112.92    6.07
   9  -6   3  139.52   14.17
   9  -7  -6   70.11    8.46
   9  -7  -5    6.87    4.96
   9  -7  -5    6.02    8.17
   9   7  -4   20.70   12.02
   9  -7  -4   16.76    5.27
   9  -7  -4   17.93    8.17
   9   7  -3   -2.12   10.21
   9  -7  -3    9.37    5.20
   9  -7  -3   -5.08    8.33
   9  -7  -2   33.23    5.50
   9  -7  -2   53.47   13.18
   9   7  -1  -16.71   12.66
   9  -7  -1    9.21    8.07
   9   7   0  119.40   18.11
  10   0 -11   -5.44    6.43
  10   0 -10   21.14    6.96
  10   0  -9   13.75    7.19
  10   0  -8  150.21   12.15
  10   0  -7   -2.49    5.64
  10   0  -6   11.33    6.34
  10   0  -5    7.82    5.69
  10   0  -4   29.55    6.98
  10   0  -3   -0.51    5.22
  10   0  -2  160.15   11.00
  10   0  -1   -0.96    4.99
  10   0   0   -2.34    4.96
  10   0   2   22.20    4.77
  10   0   3   -1.07    3.97
  10   0   4  150.25    6.64
  10   0   5    2.38    2.12
  10  -1 -11   78.44   10.22
  10   1 -10   18.69    7.70
  10  -1 -10    7.39    6.40
  10   1  -9    5.50    5.97
  10  -1  -9   -1.74    6.65
  10   1  -8    0.35    6.30
  10  -1  -8    7.32    6.48
  10  -1  -7   33.09    7.38
  10   1  -7   11.51    6.80
  10   1  -6   14.86    7.76
  10  -1  -6   -1.04    5.17
  10   1  -5  174.85   12.71
  10  -1  -5  147.39   10.69
  10   1  -4   -0.81    6.42
  10  -1  -4    1.05    5.12
  10   1  -3    3.67    6.30
  10  -1  -3    7.82    5.03
  10   1  -2    0.68    6.92
  10  -1  -2   -0.14    4.60
  10  -1  -1   45.39    6.32
  10   1  -1   26.30    7.32
  10   1   0   -5.96    6.83
  10  -1   0    5.98    4.26
  10   1   1  159.77   11.59
  10  -1   1  181.18    8.61
  10   1   2   -2.33    5.99
  10  -1   2    2.22    3.51
  10   1   3    1.15    5.69
  10  -1   3    7.24    3.13
  10   1   4    1.71    5.10
  10  -1   4    0.65    1.40
  10  -2 -11   -7.54    6.67
  10   2 -10   24.67    6.76
  10  -2 -10   14.50    6.44
  10   2  -9   -3.10    7.28
  10  -2  -9   -0.72    6.00
  10   2  -8   82.37   10.73
  10  -2  -8   82.61    9.31
  10   2  -7   -7.98    7.11
  10  -2  -7   -0.15    5.28
  10   2  -6   12.17    7.61
  10  -2  -6    2.98    5.02
  10   2  -5    1.02    7.03
  10  -2  -5   -6.79    5.06
  10  -2  -4   51.78    7.12
  10   2  -4   38.90    8.37
  10   2  -3    1.68    6.70
  10  -2  -3    3.36    4.83
  10   2  -2  190.32   14.63
  10  -2  -2  178.72   10.12
  10   2  -1    6.52    7.49
  10  -2  -1    4.43    3.87
  10   2   0    7.50    7.02
  10  -2   0   10.08    4.09
  10   2   1    8.88    6.96
  10  -2   1   -0.08    3.36
  10   2   2   29.13    8.24
  10  -2   2   16.79    3.19
  10  -2   2   19.69    6.78
  10   2   3    8.60    6.86
  10  -2   3   -0.34    2.25
  10  -2   3    5.37    6.50
  10  -2   4  115.02   11.68
  10  -2   5   13.66    7.52
  10  -3 -10   -2.59    6.02
  10   3  -9  -10.28    8.19
  10  -3  -9   11.09    6.59
  10   3  -8   16.42    7.62
  10  -3  -8    0.22    5.29
  10  -3  -7   36.98    7.27
  10   3  -7   35.58    9.61
  10   3  -6   -6.93    7.11
  10  -3  -6    0.83    5.51
  10   3  -5  161.79   14.35
  10  -3  -5  132.09   10.12
  10  -3  -5  170.69   13.32
  10   3  -4    0.67    7.75
  10  -3  -4    5.18    4.26
  10  -3  -4   -7.57    6.26
  10   3  -3    4.52    8.17
  10  -3  -3   10.53    4.53
  10  -3  -3   21.03    7.20
  10   3  -2    1.22    7.72
  10  -3  -2    4.96    4.01
  10  -3  -2   -9.59    6.71
  10   3  -1   18.72    8.28
  10  -3  -1   14.91    4.33
  10  -3  -1   30.04    7.71
  10   3   0   -1.12    7.28
  10  -3   0    4.72    3.92
  10  -3   0   -8.99    7.08
  10  -3   1  126.78    6.55
  10  -3   1  139.85   12.19
  10   3   2   12.35    8.32
  10  -3   2    2.54    2.77
  10  -3   2    5.76    6.44
  10  -3   3   -1.23    7.38
  10  -3   4   -9.28    7.53
  10  -4  -9   -1.91    6.24
  10   4  -8   94.08   12.12
  10  -4  -8   65.84    8.59
  10  -4  -8   94.72   10.60
  10   4  -7   -0.36    7.48
  10  -4  -7    0.37    5.65
  10  -4  -7    8.48    7.01
  10   4  -6    2.27    7.77
  10  -4  -6   11.83    5.96
  10  -4  -6    4.80    7.00
  10   4  -5   15.12    9.82
  10  -4  -5    1.33    4.67
  10  -4  -5    4.71    7.10
  10   4  -4   25.12    9.06
  10  -4  -4   33.70    5.82
  10   4  -3    5.65    8.86
  10  -4  -3   -0.10    4.38
  10  -4  -3    3.15    7.23
  10   4  -2  116.44   14.56
  10  -4  -2  101.16    7.46
  10  -4  -2  130.58   12.11
  10   4  -1    1.90    7.92
  10  -4  -1    7.04    3.81
  10  -4  -1   -1.81    6.66
  10   4   0    0.90    8.48
  10  -4   0    7.76    3.95
  10  -4   0   14.88    7.61
  10  -4   1    5.70    3.56
  10  -4   1    7.50    7.04
  10  -4   2   48.24    9.41
  10   5  -7    8.69    8.81
  10  -5  -7   23.62    8.37
  10   5  -6    6.98    9.27
  10  -5  -6  -12.36    8.37
  10   5  -5  103.17   13.67
  10  -5  -5  107.79   12.33
  10   5  -4    3.14    8.85
  10  -5  -4   -0.55    9.14
  10   5  -3    3.27    9.24
  10  -5  -3    3.65    8.14
  10   5  -2   -1.82    9.42
  10  -5  -2    3.42    7.43
  10  -5  -1    7.60    7.15
   0   0   0    0.00    0.00


TITL mo_SeO3_5T in P2(1)/n
REM P2(1)/n (#14 in standard setting)
CELL 0.71073   6.686607   7.993174  12.616500  90.0000  99.6026  90.0000
ZERR    2.00   0.000463   0.000440   0.000976   0.0000   0.0072   0.0000
LATT  1
SYMM -x+1/2, y+1/2,-z+1/2
SFAC O Cl Se Cs U
UNIT 16.00 6.00 6.00 4.00 4.00
TREF
HKLF 4
END
_computing_structure_solution     'SHELXT 2014/5 (Sheldrick, 2014)'
;
_shelx_hkl_checksum                51618
_olex2_submission_special_instructions  'No special instructions were received'
_oxdiff_exptl_absorpt_empirical_details
;
Empirical correction (ABSPACK) includes:
- Absorption correction using spherical harmonics
- Frame scaling
- Detector area scaling
;
_oxdiff_exptl_absorpt_empirical_full_max  5.285
_oxdiff_exptl_absorpt_empirical_full_min  0.447
