# Supplementary material
Source: MDPI journal article supplement (https://www.mdpi.com/2073-4352/10/12/1122)
Supplement: s1 [file s1 › Compound_6.cif]

data_Compound_6_mo_uco3_4_yel
_audit_creation_date               2020-10-11
_audit_creation_method
;
Olex2 1.3
(compiled 2020.07.31 svn.rc2a77460 for OlexSys, GUI svn.r6145)
;
_shelx_SHELXL_version_number       '2018/3'
_audit_contact_author_address      ?
_audit_contact_author_email        ?
_audit_contact_author_name         ''
_audit_contact_author_phone        ?
_publ_contact_author_id_orcid      ?
_publ_section_references
;
Dolomanov, O.V., Bourhis, L.J., Gildea, R.J, Howard, J.A.K. & Puschmann, H.
 (2009), J. Appl. Cryst. 42, 339-341.

Sheldrick, G.M. (2015). Acta Cryst. C71, 3-8.
;
_chemical_name_common              ?
_chemical_name_systematic          ?
_chemical_formula_moiety           'H8 N2 O15 U2, H2 O'
_chemical_formula_sum              'H10 N2 O16 U2'
_chemical_formula_weight           770.16
_chemical_melting_point            ?
loop_
  _atom_type_symbol
  _atom_type_description
  _atom_type_scat_dispersion_real
  _atom_type_scat_dispersion_imag
  _atom_type_scat_source
 'H' 'H' 0.0000 0.0000 'International Tables Vol C Tables 4.2.6.8 and 6.1.1.4'
 'N' 'N' 0.0061 0.0033 'International Tables Vol C Tables 4.2.6.8 and 6.1.1.4'
 'O' 'O' 0.0106 0.0060 'International Tables Vol C Tables 4.2.6.8 and 6.1.1.4'
 'U' 'U' -9.6767 9.6646 'International Tables Vol C Tables 4.2.6.8 and 6.1.1.4'

_shelx_space_group_comment
;
The symmetry employed for this shelxl refinement is uniquely defined
by the following loop, which should always be used as a source of
symmetry information in preference to the above space-group names.
They are only intended as comments.
;
_space_group_crystal_system        'triclinic'
_space_group_IT_number             2
_space_group_name_H-M_alt          'P -1'
_space_group_name_Hall             '-P 1'
loop_
  _space_group_symop_operation_xyz
 'x, y, z'
 '-x, -y, -z'

_cell_length_a                     10.9048(2)
_cell_length_b                     10.9944(2)
_cell_length_c                     17.0902(3)
_cell_angle_alpha                  73.445(2)
_cell_angle_beta                   89.4210(10)
_cell_angle_gamma                  86.3820(10)
_cell_volume                       1960.06(6)
_cell_formula_units_Z              6
_cell_measurement_reflns_used      18442
_cell_measurement_temperature      100(2)
_cell_measurement_theta_max        36.8950
_cell_measurement_theta_min        1.9930
_shelx_estimated_absorpt_T_max     0.190
_shelx_estimated_absorpt_T_min     0.063
_exptl_absorpt_coefficient_mu      24.846
_exptl_absorpt_correction_T_max    1.00000
_exptl_absorpt_correction_T_min    0.78283
_exptl_absorpt_correction_type     multi-scan
_exptl_absorpt_process_details
;
CrysAlisPro 1.171.39.44a (Rigaku Oxford Diffraction, 2018)
Empirical absorption correction using spherical harmonics,
 implemented in SCALE3 ABSPACK scaling algorithm.
;
_exptl_absorpt_special_details     ?
_exptl_crystal_colour              'yellow'
_exptl_crystal_colour_lustre       'clear'
_exptl_crystal_colour_primary      'yellow'
_exptl_crystal_density_diffrn      3.915
_exptl_crystal_density_meas        ?
_exptl_crystal_density_method      ?
_exptl_crystal_description         'prism'
_exptl_crystal_F_000               2016
_exptl_crystal_size_max            0.25
_exptl_crystal_size_mid            0.13
_exptl_crystal_size_min            0.10
_exptl_transmission_factor_max     ?
_exptl_transmission_factor_min     ?
_diffrn_reflns_av_R_equivalents    0.0331
_diffrn_reflns_av_unetI/netI       0.0362
_diffrn_reflns_Laue_measured_fraction_full  1.000
_diffrn_reflns_Laue_measured_fraction_max  1.000
_diffrn_reflns_limit_h_max         14
_diffrn_reflns_limit_h_min         -14
_diffrn_reflns_limit_k_max         14
_diffrn_reflns_limit_k_min         -14
_diffrn_reflns_limit_l_max         21
_diffrn_reflns_limit_l_min         -22
_diffrn_reflns_number              23202
_diffrn_reflns_point_group_measured_fraction_full  1.000
_diffrn_reflns_point_group_measured_fraction_max  1.000
_diffrn_reflns_theta_full          25.242
_diffrn_reflns_theta_max           27.500
_diffrn_reflns_theta_min           1.936
_diffrn_ambient_temperature        100(2)
_diffrn_detector_area_resol_mean   ?
_diffrn_measured_fraction_theta_full  1.000
_diffrn_measured_fraction_theta_max  1.000
_diffrn_measurement_details
;
List of Runs (angles in degrees, time in seconds):

  # Type    Start    End  Width  t~exp~   \w     \q     \k     \f   Frames
--------------------------------------------------------------------------
  1  \f   -360.00   9.50   0.50   39.99 -98.65 -34.00 -40.00    --   739
  2  \f     50.72 321.72   0.50   39.99 -52.22 -34.00  82.00    --   542
  3  \w    -96.36 -28.86   0.50   40.00    --  -36.00 144.00-112.00  135
;
_diffrn_measurement_device         'abstract diffractometer'
_diffrn_measurement_device_type    'Bruker Kappa APEX-II DUO CCD'
_diffrn_measurement_method         '\w and \f scans'
_diffrn_radiation_type             MoK\a
_diffrn_radiation_wavelength       0.71073
_diffrn_source                     ?
_reflns_Friedel_coverage           0.000
_reflns_Friedel_fraction_full      .
_reflns_Friedel_fraction_max       .
_reflns_number_gt                  6988
_reflns_number_total               9006
_reflns_special_details
;
 Reflections were merged by SHELXL according to the crystal
 class for the calculation of statistics and refinement.
 
 _reflns_Friedel_fraction is defined as the number of unique
 Friedel pairs measured divided by the number that would be
 possible theoretically, ignoring centric projections and
 systematic absences.
;
_reflns_threshold_expression       'I > 2\s(I)'
_computing_cell_refinement         'CrysAlisPro 1.171.39.44a (Rigaku OD, 2018)'
_computing_data_collection         'CrysAlisPro 1.171.39.44a (Rigaku OD, 2018)'
_computing_data_reduction          'CrysAlisPro 1.171.39.44a (Rigaku OD, 2018)'
_computing_molecular_graphics      'Olex2 1.3 (Dolomanov et al., 2009)'
_computing_publication_material    'Olex2 1.3 (Dolomanov et al., 2009)'
_computing_structure_refinement    'SHELXL (Sheldrick, 2015)'
_computing_structure_solution      'ShelXT (Sheldrick, 2015)'
_refine_diff_density_max           1.279
_refine_diff_density_min           -1.364
_refine_diff_density_rms           0.266
_refine_ls_extinction_coef         .
_refine_ls_extinction_method       none
_refine_ls_goodness_of_fit_ref     1.018
_refine_ls_hydrogen_treatment      mixed
_refine_ls_matrix_type             full
_refine_ls_number_parameters       626
_refine_ls_number_reflns           9006
_refine_ls_number_restraints       31
_refine_ls_R_factor_all            0.0439
_refine_ls_R_factor_gt             0.0287
_refine_ls_restrained_S_all        1.017
_refine_ls_shift/su_max            0.000
_refine_ls_shift/su_mean           0.000
_refine_ls_structure_factor_coef   Fsqd
_refine_ls_weighting_details      
 'w=1/[\s^2^(Fo^2^)+(0.0238P)^2^] where P=(Fo^2^+2Fc^2^)/3'
_refine_ls_weighting_scheme        calc
_refine_ls_wR_factor_gt            0.0560
_refine_ls_wR_factor_ref           0.0608
_refine_special_details            ?
_olex2_refinement_description
;
1. Fixed Uiso
 At 1.5 times of:
  All O(H,H) groups
2. Restrained distances
 H34A-O34
 0.98 with sigma of 0.02
 H47A-O47
 0.98 with sigma of 0.02
 H47B-O47
 0.98 with sigma of 0.02
 H38B-O38
 0.98 with sigma of 0.02
 O38-H38A
 0.98 with sigma of 0.02
 O33-H33A
 0.98 with sigma of 0.02
 H45A_$1-O45_$1
 0.98 with sigma of 0.02
 H33B-O33
 0.98 with sigma of 0.02
 O31-H31
 0.98 with sigma of 0.02
 H32-O32
 0.98 with sigma of 0.02
 H36-O36
 0.98 with sigma of 0.02
 O37-H37
 0.98 with sigma of 0.04
 H48A-O48
 0.98 with sigma of 0.02
 O48-H48B
 0.98 with sigma of 0.02
 H40A-O40
 0.98 with sigma of 0.02
 O40-H40B
 0.98 with sigma of 0.02
 O39-H39B
 0.98 with sigma of 0.02
 O39-H39A
 0.98 with sigma of 0.02
 H35A-O35
 0.98 with sigma of 0.02
 O35-H35B
 0.98 with sigma of 0.02
 O41-H41
 0.98 with sigma of 0.02
 H42-O42
 0.98 with sigma of 0.02
 H45B-O45
 0.98 with sigma of 0.02
 H34B-O34
 0.98 with sigma of 0.02
 H46A-O46
 0.98 with sigma of 0.02
 O46-H46B
 0.98 with sigma of 0.02
 O43-H43A
 0.98 with sigma of 0.02
 O43-H43B
 0.98 with sigma of 0.02
 H40B-H48A_$3
 2.2 with sigma of 0.02
 H34B-H46A_$2
 2.2 with sigma of 0.02
 H39B-H48A
 2.2 with sigma of 0.02
3. Restrained angles
 H43B-O43-H43A
 fixed at 104 with sigma of 0.02
4. Uiso/Uaniso restraints and constraints
Uiso(H34B) = Uiso(H34A)
Uanis(O40) = Uanis(O39)
Uanis(O1) = Uanis(O2)
Uanis(O20) = Uanis(O19)
5. Others
 Fixed X: O43(0.75078) H43A(0.673901) H43B(0.80699)
 Fixed Y: O43(1.422729) H43A(1.39799) H43B(1.34911)
 Fixed Z: O43(0.739659) H43A(0.722569) H43B(0.74521)
6.a Rotating group:
 O44(H44A,H44B)
;
_atom_sites_solution_hydrogens     difmap
_atom_sites_solution_primary       ?
_atom_sites_solution_secondary     ?
loop_
  _atom_site_label
  _atom_site_type_symbol
  _atom_site_fract_x
  _atom_site_fract_y
  _atom_site_fract_z
  _atom_site_U_iso_or_equiv
  _atom_site_adp_type
  _atom_site_occupancy
  _atom_site_site_symmetry_order
  _atom_site_calc_flag
  _atom_site_refinement_flags_posn
  _atom_site_refinement_flags_adp
  _atom_site_refinement_flags_occupancy
  _atom_site_disorder_assembly
  _atom_site_disorder_group
 U1 U 0.49144(2) 1.26216(2) 0.46054(2) 0.00576(6) Uani 1 1 d . . . . .
 U2 U 0.41578(2) 1.16074(2) 0.69489(2) 0.00553(6) Uani 1 1 d . . . . .
 U3 U 0.82391(2) 1.06002(2) 0.88183(2) 0.00574(6) Uani 1 1 d . . . . .
 U4 U 0.91393(2) 1.15931(2) 0.64925(2) 0.00556(6) Uani 1 1 d . . . . .
 U5 U 0.83409(2) 1.58541(2) 0.78712(2) 0.00561(6) Uani 1 1 d . . . . .
 U6 U 0.75967(2) 1.51501(2) 1.02104(2) 0.00527(6) Uani 1 1 d . . . . .
 O1 O 0.6384(4) 1.1804(4) 0.4746(3) 0.0105(7) Uani 1 1 d . . . . .
 O2 O 0.3421(4) 1.3394(4) 0.4447(3) 0.0105(7) Uani 1 1 d . . . . .
 O3 O 0.5543(4) 1.0653(4) 0.7228(3) 0.0106(10) Uani 1 1 d . . . . .
 O4 O 0.2805(4) 1.2581(4) 0.6654(3) 0.0100(10) Uani 1 1 d . . . . .
 O5 O 0.9636(4) 0.9693(4) 0.9114(3) 0.0118(10) Uani 1 1 d . . . . .
 O6 O 0.6836(4) 1.1513(4) 0.8570(3) 0.0100(10) Uani 1 1 d . . . . .
 O7 O 1.0504(4) 1.0643(4) 0.6811(3) 0.0111(10) Uani 1 1 d . . . . .
 O8 O 0.7741(4) 1.2521(4) 0.6193(3) 0.0090(10) Uani 1 1 d . . . . .
 O9 O 0.9734(4) 1.4920(4) 0.8079(3) 0.0091(10) Uani 1 1 d . . . . .
 O10 O 0.6937(4) 1.6777(5) 0.7623(3) 0.0135(11) Uani 1 1 d . . . . .
 O11 O 0.8960(4) 1.4158(4) 1.0515(3) 0.0091(10) Uani 1 1 d . . . . .
 O12 O 0.6249(4) 1.6123(4) 0.9901(3) 0.0107(10) Uani 1 1 d . . . . .
 O13 O 0.3040(4) 0.9613(4) 0.7043(3) 0.0090(10) Uani 1 1 d . . . . .
 O14 O 0.1997(4) 0.8627(5) 0.8101(3) 0.0125(10) Uani 1 1 d . . . . .
 O15 O 0.2988(4) 1.0277(5) 0.8115(3) 0.0121(10) Uani 1 1 d . . . . .
 O16 O 0.4196(4) 1.2089(4) 0.8332(3) 0.0110(10) Uani 1 1 d . . . . .
 O17 O 0.5122(4) 1.3641(4) 0.8579(3) 0.0113(10) Uani 1 1 d . . . . .
 O18 O 0.5110(4) 1.3400(4) 0.7358(3) 0.0104(10) Uani 1 1 d . . . . .
 O19 O 0.8120(4) 0.9828(5) 0.6064(3) 0.0101(7) Uani 1 1 d . . . . .
 O20 O 0.8168(4) 0.9606(4) 0.4831(3) 0.0101(7) Uani 1 1 d . . . . .
 O21 O 0.9155(4) 1.1079(4) 0.5126(3) 0.0096(10) Uani 1 1 d . . . . .
 O22 O 1.0445(4) 1.2863(4) 0.5371(3) 0.0125(10) Uani 1 1 d . . . . .
 O23 O 1.1226(4) 1.4649(4) 0.5348(3) 0.0147(11) Uani 1 1 d . . . . .
 O24 O 1.0096(4) 1.3669(4) 0.6373(3) 0.0093(10) Uani 1 1 d . . . . .
 O25 O 0.6380(4) 1.3222(4) 1.0458(3) 0.0110(10) Uani 1 1 d . . . . .
 O26 O 0.5379(4) 1.2402(5) 1.1577(3) 0.0118(10) Uani 1 1 d . . . . .
 O27 O 0.6510(4) 1.4009(5) 1.1466(3) 0.0135(11) Uani 1 1 d . . . . .
 O28 O 0.7655(4) 1.5935(4) 1.1463(3) 0.0096(10) Uani 1 1 d . . . . .
 O29 O 0.8600(4) 1.7565(5) 1.1584(3) 0.0139(10) Uani 1 1 d . . . . .
 O30 O 0.8689(4) 1.7002(5) 1.0459(3) 0.0117(10) Uani 1 1 d . . . . .
 O31 O 0.4174(4) 1.1010(4) 0.5720(3) 0.0072(9) Uani 1 1 d D . . . .
 H31 H 0.335(4) 1.075(9) 0.564(5) 0.05(3) Uiso 1 1 d D . . . .
 O32 O 0.5159(4) 1.3047(4) 0.5871(2) 0.0052(9) Uani 1 1 d D . . . .
 H32 H 0.604(2) 1.308(7) 0.597(4) 0.02(2) Uiso 1 1 d D . . . .
 O33 O 0.4267(4) 1.1040(4) 0.4001(3) 0.0088(10) Uani 1 1 d D . . . .
 H33A H 0.346(5) 1.079(10) 0.391(6) 0.08(4) Uiso 1 1 d D . . . .
 H33B H 0.488(6) 1.038(6) 0.395(5) 0.04(3) Uiso 1 1 d D . . . .
 O34 O 0.5335(4) 1.3338(5) 0.3145(3) 0.0156(11) Uani 1 1 d D . . . .
 H34A H 0.493(5) 1.316(6) 0.270(3) 0.004(12) Uiso 1 1 d D . . . .
 H34B H 0.606(3) 1.378(5) 0.299(4) 0.004(12) Uiso 1 1 d D . . . .
 O35 O 0.5925(4) 1.4591(5) 0.4312(3) 0.0119(10) Uani 1 1 d D . . . .
 H35A H 0.648(15) 1.47(2) 0.384(8) 0.25(11) Uiso 1 1 d D . . . .
 H35B H 0.550(7) 1.540(4) 0.428(5) 0.04(3) Uiso 1 1 d D . . . .
 O36 O 0.9083(4) 1.2165(5) 0.7723(3) 0.0110(10) Uani 1 1 d D . . . .
 H36 H 0.991(3) 1.225(8) 0.789(5) 0.03(2) Uiso 1 1 d D . . . .
 O37 O 0.8189(4) 1.0095(5) 0.7558(3) 0.0098(10) Uani 1 1 d D . . . .
 H37 H 0.735(4) 1.000(7) 0.746(4) 0.013(19) Uiso 1 1 d D . . . .
 O38 O 0.8870(4) 1.2199(5) 0.9409(3) 0.0102(10) Uani 1 1 d D . . . .
 H38A H 0.830(5) 1.296(4) 0.928(4) 0.011(19) Uiso 1 1 d D . . . .
 H38B H 0.967(3) 1.223(7) 0.965(4) 0.013(19) Uiso 1 1 d D . . . .
 O39 O 0.7365(5) 1.0051(5) 1.0189(3) 0.0128(7) Uani 1 1 d D . . . .
 H39A H 0.786(6) 1.000(7) 1.066(3) 0.03(2) Uiso 1 1 d D . . . .
 H39B H 0.664(5) 1.063(7) 1.012(5) 0.05(3) Uiso 1 1 d D . . . .
 O40 O 0.7107(5) 0.8742(5) 0.8967(3) 0.0128(7) Uani 1 1 d D . . . .
 H40A H 0.750(8) 0.793(5) 0.895(6) 0.05(3) Uiso 1 1 d D . . . .
 H40B H 0.655(10) 0.875(17) 0.942(7) 0.23(10) Uiso 1 1 d D . . . .
 O41 O 0.7497(4) 1.4406(4) 0.9041(3) 0.0099(10) Uani 1 1 d D . . . .
 H41 H 0.666(3) 1.430(8) 0.888(5) 0.03(2) Uiso 1 1 d D . . . .
 O42 O 0.8505(4) 1.6504(4) 0.9055(3) 0.0072(9) Uani 1 1 d D . . . .
 H42 H 0.937(2) 1.663(6) 0.907(4) 0.002(16) Uiso 1 1 d D . . . .
 O43 O 0.750780 1.422729 0.739659 0.0121(10) Uani 1 1 d D . . . .
 H43A H 0.673901 1.397991 0.722569 0.02(2) Uiso 1 1 d D . . . .
 H43B H 0.806990 1.349110 0.745210 0.05(3) Uiso 1 1 d D . . . .
 O44 O 0.9032(4) 1.6157(5) 0.6447(3) 0.0138(11) Uani 1 1 d . . . . .
 H44A H 0.840518 1.636759 0.610128 0.021 Uiso 1 1 d R U . . .
 H44B H 0.933168 1.543178 0.637868 0.021 Uiso 1 1 d R U . . .
 O45 O 0.9363(4) 1.7798(5) 0.7515(3) 0.0109(10) Uani 1 1 d D . . . .
 H45A H 0.912(6) 1.864(3) 0.758(4) 0.009(19) Uiso 1 1 d . . . . .
 H45B H 1.002(6) 1.798(9) 0.712(4) 0.05(3) Uiso 1 1 d D . . . .
 O46 O 1.2505(4) 1.5553(5) 0.6877(3) 0.0161(11) Uani 1 1 d D . . . .
 H46A H 1.195(3) 1.631(4) 0.683(5) 0.03(2) Uiso 1 1 d D . . . .
 H46B H 1.219(7) 1.506(7) 0.740(3) 0.03(2) Uiso 1 1 d D . . . .
 O47 O 1.1310(4) 0.7920(5) 0.6580(3) 0.0146(11) Uani 1 1 d D . . . .
 H47A H 1.188(11) 0.840(12) 0.680(8) 0.14(6) Uiso 1 1 d D . . . .
 H47B H 1.099(6) 0.810(6) 0.6031(19) 0.008(18) Uiso 1 1 d D . . . .
 O48 O 0.5046(4) 1.1284(5) 1.0124(3) 0.0138(10) Uani 1 1 d D . . . .
 H48A H 0.521(4) 1.208(4) 1.022(5) 0.05(3) Uiso 1 1 d D . . . .
 H48B H 0.485(7) 1.138(8) 0.9558(18) 0.03(2) Uiso 1 1 d D . . . .
 N1 N 0.2641(5) 0.9462(5) 0.7770(3) 0.0097(12) Uani 1 1 d . . . . .
 N2 N 0.4823(5) 1.3067(5) 0.8111(3) 0.0072(11) Uani 1 1 d . . . . .
 N3 N 0.8458(5) 1.0143(6) 0.5322(3) 0.0100(12) Uani 1 1 d . . . . .
 N4 N 1.0620(5) 1.3762(6) 0.5681(3) 0.0109(12) Uani 1 1 d . . . . .
 N5 N 0.6053(5) 1.3176(5) 1.1191(3) 0.0084(11) Uani 1 1 d . . . . .
 N6 N 0.8336(5) 1.6855(5) 1.1197(3) 0.0080(11) Uani 1 1 d . . . . .

loop_
  _atom_site_aniso_label
  _atom_site_aniso_U_11
  _atom_site_aniso_U_22
  _atom_site_aniso_U_33
  _atom_site_aniso_U_23
  _atom_site_aniso_U_13
  _atom_site_aniso_U_12
 U1 0.00640(12) 0.00525(12) 0.00558(11) -0.00151(9) 0.00006(9) -0.00003(9)
 U2 0.00597(12) 0.00545(12) 0.00537(11) -0.00185(9) 0.00021(9) -0.00057(9)
 U3 0.00679(12) 0.00515(12) 0.00532(11) -0.00169(9) -0.00012(9) 0.00020(9)
 U4 0.00556(12) 0.00564(13) 0.00571(12) -0.00201(9) 0.00023(9) -0.00038(9)
 U5 0.00604(12) 0.00542(12) 0.00548(12) -0.00185(9) -0.00019(9) 0.00030(9)
 U6 0.00549(11) 0.00525(12) 0.00526(11) -0.00175(9) 0.00034(9) -0.00062(9)
 O1 0.0073(16) 0.0098(18) 0.0147(17) -0.0049(14) -0.0002(13) 0.0039(13)
 O2 0.0073(16) 0.0098(18) 0.0147(17) -0.0049(14) -0.0002(13) 0.0039(13)
 O3 0.011(2) 0.009(2) 0.010(2) -0.0017(19) -0.0033(18) 0.0024(19)
 O4 0.006(2) 0.011(3) 0.013(2) -0.002(2) -0.0006(18) 0.0021(18)
 O5 0.012(2) 0.010(3) 0.012(2) -0.001(2) -0.0024(19) 0.002(2)
 O6 0.010(2) 0.009(2) 0.008(2) 0.0006(19) 0.0008(18) -0.0004(19)
 O7 0.009(2) 0.009(2) 0.016(2) -0.004(2) 0.0002(19) -0.0010(19)
 O8 0.008(2) 0.012(3) 0.007(2) -0.0023(19) -0.0023(18) 0.0006(19)
 O9 0.008(2) 0.009(2) 0.010(2) -0.0015(19) 0.0023(18) -0.0006(18)
 O10 0.012(2) 0.018(3) 0.011(2) -0.008(2) -0.0017(19) 0.003(2)
 O11 0.005(2) 0.006(2) 0.014(2) -0.0002(19) -0.0036(18) 0.0007(18)
 O12 0.011(2) 0.007(2) 0.013(2) -0.0021(19) -0.0012(19) -0.0022(19)
 O13 0.010(2) 0.009(2) 0.010(2) -0.0046(19) 0.0014(18) -0.0026(19)
 O14 0.012(2) 0.011(3) 0.012(2) 0.002(2) 0.0028(19) -0.005(2)
 O15 0.016(2) 0.011(3) 0.012(2) -0.006(2) 0.002(2) -0.009(2)
 O16 0.006(2) 0.009(2) 0.016(2) -0.001(2) -0.0010(19) -0.0053(19)
 O17 0.010(2) 0.013(3) 0.015(2) -0.010(2) -0.0020(19) -0.0001(19)
 O18 0.015(2) 0.008(2) 0.007(2) 0.0005(19) -0.0026(18) -0.0021(19)
 O19 0.0109(16) 0.0154(19) 0.0071(16) -0.0081(14) 0.0008(13) -0.0010(14)
 O20 0.0109(16) 0.0154(19) 0.0071(16) -0.0081(14) 0.0008(13) -0.0010(14)
 O21 0.010(2) 0.014(3) 0.007(2) -0.0036(19) 0.0024(18) -0.006(2)
 O22 0.016(2) 0.008(2) 0.014(2) -0.003(2) 0.008(2) -0.001(2)
 O23 0.015(3) 0.005(2) 0.021(3) 0.003(2) 0.004(2) -0.003(2)
 O24 0.010(2) 0.010(2) 0.010(2) -0.0061(19) 0.0020(18) -0.0016(19)
 O25 0.013(2) 0.010(3) 0.011(2) -0.005(2) 0.0031(19) 0.000(2)
 O26 0.011(2) 0.014(3) 0.009(2) -0.001(2) 0.0019(19) -0.005(2)
 O27 0.017(3) 0.014(3) 0.011(2) -0.005(2) -0.001(2) -0.005(2)
 O28 0.012(2) 0.008(2) 0.009(2) -0.0018(19) 0.0035(19) -0.0052(19)
 O29 0.017(3) 0.015(3) 0.014(2) -0.012(2) -0.002(2) 0.001(2)
 O30 0.017(3) 0.015(3) 0.003(2) -0.0025(19) 0.0009(19) -0.007(2)
 O31 0.007(2) 0.007(2) 0.009(2) -0.0025(19) -0.0006(18) -0.0031(18)
 O32 0.007(2) 0.005(2) 0.003(2) -0.0010(18) 0.0017(17) -0.0029(18)
 O33 0.012(2) 0.007(2) 0.009(2) -0.0040(19) 0.0009(19) -0.0030(19)
 O34 0.019(3) 0.020(3) 0.010(2) -0.004(2) 0.002(2) -0.011(2)
 O35 0.015(3) 0.009(3) 0.010(2) -0.001(2) 0.001(2) -0.001(2)
 O36 0.010(2) 0.011(3) 0.014(2) -0.006(2) -0.0025(19) 0.000(2)
 O37 0.007(2) 0.014(3) 0.009(2) -0.005(2) -0.0027(18) -0.001(2)
 O38 0.007(2) 0.010(3) 0.015(2) -0.004(2) -0.0032(19) 0.0020(19)
 O39 0.0208(19) 0.0074(18) 0.0095(17) -0.0009(14) 0.0032(14) -0.0034(15)
 O40 0.0208(19) 0.0074(18) 0.0095(17) -0.0009(14) 0.0032(14) -0.0034(15)
 O41 0.012(2) 0.008(2) 0.010(2) -0.0043(19) -0.0009(19) -0.0041(19)
 O42 0.005(2) 0.007(2) 0.012(2) -0.0063(19) -0.0013(18) -0.0004(18)
 O43 0.015(3) 0.011(3) 0.013(2) -0.007(2) -0.003(2) -0.006(2)
 O44 0.022(3) 0.010(3) 0.011(2) -0.004(2) -0.002(2) -0.004(2)
 O45 0.015(2) 0.012(3) 0.008(2) -0.005(2) 0.0052(19) -0.005(2)
 O46 0.016(3) 0.016(3) 0.014(3) -0.001(2) 0.003(2) 0.003(2)
 O47 0.018(3) 0.013(3) 0.015(3) -0.006(2) 0.004(2) -0.009(2)
 O48 0.016(3) 0.014(3) 0.013(2) -0.007(2) 0.004(2) -0.005(2)
 N1 0.005(3) 0.011(3) 0.011(3) 0.000(2) 0.000(2) 0.000(2)
 N2 0.010(3) 0.008(3) 0.004(3) -0.001(2) -0.003(2) 0.002(2)
 N3 0.006(3) 0.014(3) 0.014(3) -0.011(2) -0.001(2) -0.001(2)
 N4 0.012(3) 0.012(3) 0.011(3) -0.007(2) 0.003(2) -0.001(2)
 N5 0.008(3) 0.006(3) 0.009(3) 0.001(2) 0.006(2) 0.001(2)
 N6 0.009(3) 0.008(3) 0.008(3) -0.003(2) 0.002(2) -0.001(2)

_geom_special_details
;
 All esds (except the esd in the dihedral angle between two l.s. planes)
 are estimated using the full covariance matrix.  The cell esds are taken
 into account individually in the estimation of esds in distances, angles
 and torsion angles; correlations between esds in cell parameters are only
 used when they are defined by crystal symmetry.  An approximate (isotropic)
 treatment of cell esds is used for estimating esds involving l.s. planes.
;
loop_
  _geom_bond_atom_site_label_1
  _geom_bond_atom_site_label_2
  _geom_bond_distance
  _geom_bond_site_symmetry_2
  _geom_bond_publ_flag
 U1 U2 3.9331(3) . ?
 U1 O1 1.771(4) . ?
 U1 O2 1.775(4) . ?
 U1 O31 2.376(4) . ?
 U1 O32 2.361(4) . ?
 U1 O33 2.404(5) . ?
 U1 O34 2.441(5) . ?
 U1 O35 2.414(5) . ?
 U2 O3 1.772(4) . ?
 U2 O4 1.756(4) . ?
 U2 O13 2.540(4) . ?
 U2 O15 2.502(4) . ?
 U2 O16 2.567(5) . ?
 U2 O18 2.552(5) . ?
 U2 O31 2.372(4) . ?
 U2 O32 2.368(4) . ?
 U3 U4 3.9419(3) . ?
 U3 O5 1.762(4) . ?
 U3 O6 1.762(5) . ?
 U3 O36 2.374(5) . ?
 U3 O37 2.375(4) . ?
 U3 O38 2.400(5) . ?
 U3 O39 2.445(5) . ?
 U3 O40 2.404(5) . ?
 U4 O7 1.761(5) . ?
 U4 O8 1.774(4) . ?
 U4 O19 2.576(4) . ?
 U4 O21 2.554(4) . ?
 U4 O22 2.514(4) . ?
 U4 O24 2.524(5) . ?
 U4 O36 2.360(5) . ?
 U4 O37 2.360(5) . ?
 U5 U6 3.9358(3) . ?
 U5 O9 1.759(4) . ?
 U5 O10 1.768(5) . ?
 U5 O41 2.391(5) . ?
 U5 O42 2.342(4) . ?
 U5 O43 2.3935(2) . ?
 U5 O44 2.478(4) . ?
 U5 O45 2.393(5) . ?
 U6 O11 1.777(4) . ?
 U6 O12 1.754(5) . ?
 U6 O25 2.503(5) . ?
 U6 O27 2.487(5) . ?
 U6 O28 2.528(5) . ?
 U6 O30 2.561(5) . ?
 U6 O41 2.370(4) . ?
 U6 O42 2.360(4) . ?
 O13 N1 1.281(7) . ?
 O14 N1 1.197(7) . ?
 O15 N1 1.281(7) . ?
 O16 N2 1.273(7) . ?
 O17 N2 1.209(7) . ?
 O18 N2 1.275(6) . ?
 O19 N3 1.272(7) . ?
 O20 N3 1.211(7) . ?
 O21 N3 1.282(7) . ?
 O22 N4 1.273(7) . ?
 O23 N4 1.212(7) . ?
 O24 N4 1.289(7) . ?
 O25 N5 1.287(7) . ?
 O26 N5 1.204(7) . ?
 O27 N5 1.271(7) . ?
 O28 N6 1.268(7) . ?
 O29 N6 1.207(7) . ?
 O30 N6 1.283(7) . ?
 O31 H31 0.98(2) . ?
 O32 H32 0.98(2) . ?
 O33 H33A 0.97(2) . ?
 O33 H33B 0.97(2) . ?
 O34 H34A 0.96(2) . ?
 O34 H34B 0.95(2) . ?
 O35 H35A 0.98(2) . ?
 O35 H35B 0.97(2) . ?
 O36 H36 0.97(2) . ?
 O37 H37 0.95(4) . ?
 O38 H38A 0.99(2) . ?
 O38 H38B 0.97(2) . ?
 O39 H39A 0.97(2) . ?
 O39 H39B 0.97(2) . ?
 O40 H40A 0.97(2) . ?
 O40 H40B 0.97(2) . ?
 O41 H41 0.97(2) . ?
 O42 H42 0.97(2) . ?
 O43 H43A 0.97011(3) . ?
 O43 H43B 0.96678(3) . ?
 O44 H44A 0.8830 . ?
 O44 H44B 0.8808 . ?
 O45 H45A 0.98(2) . ?
 O45 H45B 0.98(2) . ?
 O46 H46A 0.98(2) . ?
 O46 H46B 0.97(2) . ?
 O47 H47A 0.98(2) . ?
 O47 H47B 0.96(2) . ?
 O48 H48A 0.97(2) . ?
 O48 H48B 0.97(2) . ?

loop_
  _geom_angle_atom_site_label_1
  _geom_angle_atom_site_label_2
  _geom_angle_atom_site_label_3
  _geom_angle
  _geom_angle_site_symmetry_1
  _geom_angle_site_symmetry_3
  _geom_angle_publ_flag
 O1 U1 U2 93.80(14) . . ?
 O1 U1 O2 177.7(2) . . ?
 O1 U1 O31 89.40(18) . . ?
 O1 U1 O32 89.00(18) . . ?
 O1 U1 O33 87.66(19) . . ?
 O1 U1 O34 88.22(19) . . ?
 O1 U1 O35 88.32(19) . . ?
 O2 U1 U2 86.93(14) . . ?
 O2 U1 O31 89.99(18) . . ?
 O2 U1 O32 92.81(18) . . ?
 O2 U1 O33 90.04(19) . . ?
 O2 U1 O34 91.11(19) . . ?
 O2 U1 O35 93.55(19) . . ?
 O31 U1 U2 34.03(11) . . ?
 O31 U1 O33 75.57(15) . . ?
 O31 U1 O34 147.55(16) . . ?
 O31 U1 O35 141.06(15) . . ?
 O32 U1 U2 33.77(10) . . ?
 O32 U1 O31 67.21(15) . . ?
 O32 U1 O33 142.66(15) . . ?
 O32 U1 O34 145.04(15) . . ?
 O32 U1 O35 73.88(15) . . ?
 O33 U1 U2 109.45(11) . . ?
 O33 U1 O34 72.00(16) . . ?
 O33 U1 O35 143.09(16) . . ?
 O34 U1 U2 177.54(13) . . ?
 O35 U1 U2 107.43(11) . . ?
 O35 U1 O34 71.20(16) . . ?
 O3 U2 O13 89.26(18) . . ?
 O3 U2 O15 93.43(18) . . ?
 O3 U2 O16 88.92(18) . . ?
 O3 U2 O18 89.63(18) . . ?
 O3 U2 O31 87.87(18) . . ?
 O3 U2 O32 90.96(18) . . ?
 O4 U2 O3 178.6(2) . . ?
 O4 U2 O13 91.80(18) . . ?
 O4 U2 O15 87.95(18) . . ?
 O4 U2 O16 91.55(18) . . ?
 O4 U2 O18 89.67(18) . . ?
 O4 U2 O31 91.72(18) . . ?
 O4 U2 O32 87.64(18) . . ?
 O13 U2 O16 111.22(14) . . ?
 O13 U2 O18 160.87(14) . . ?
 O15 U2 O13 50.59(14) . . ?
 O15 U2 O16 60.94(14) . . ?
 O15 U2 O18 110.44(14) . . ?
 O18 U2 O16 49.66(14) . . ?
 O31 U2 O13 66.15(15) . . ?
 O31 U2 O15 116.68(15) . . ?
 O31 U2 O16 175.88(15) . . ?
 O31 U2 O18 132.88(15) . . ?
 O32 U2 O13 133.29(14) . . ?
 O32 U2 O15 174.24(16) . . ?
 O32 U2 O16 115.48(15) . . ?
 O32 U2 O18 65.83(14) . . ?
 O32 U2 O31 67.18(15) . . ?
 O5 U3 U4 92.73(15) . . ?
 O5 U3 O36 95.46(19) . . ?
 O5 U3 O37 92.33(18) . . ?
 O5 U3 O38 91.12(19) . . ?
 O5 U3 O39 95.11(19) . . ?
 O5 U3 O40 92.7(2) . . ?
 O6 U3 U4 89.77(14) . . ?
 O6 U3 O5 177.3(2) . . ?
 O6 U3 O36 86.04(18) . . ?
 O6 U3 O37 90.33(18) . . ?
 O6 U3 O38 87.10(19) . . ?
 O6 U3 O39 82.46(18) . . ?
 O6 U3 O40 87.71(19) . . ?
 O36 U3 U4 33.52(11) . . ?
 O36 U3 O37 66.93(16) . . ?
 O36 U3 O38 74.77(16) . . ?
 O36 U3 O39 148.05(16) . . ?
 O36 U3 O40 136.47(16) . . ?
 O37 U3 U4 33.52(11) . . ?
 O37 U3 O38 141.71(16) . . ?
 O37 U3 O39 142.44(16) . . ?
 O37 U3 O40 70.07(16) . . ?
 O38 U3 U4 108.23(11) . . ?
 O38 U3 O39 74.95(16) . . ?
 O38 U3 O40 147.77(16) . . ?
 O39 U3 U4 171.50(12) . . ?
 O40 U3 U4 103.53(11) . . ?
 O40 U3 O39 72.84(16) . . ?
 O7 U4 O8 178.4(2) . . ?
 O7 U4 O19 92.96(18) . . ?
 O7 U4 O21 91.75(18) . . ?
 O7 U4 O22 84.55(18) . . ?
 O7 U4 O24 94.90(18) . . ?
 O7 U4 O36 90.52(19) . . ?
 O7 U4 O37 85.76(18) . . ?
 O8 U4 O19 86.34(18) . . ?
 O8 U4 O21 88.91(17) . . ?
 O8 U4 O22 97.05(18) . . ?
 O8 U4 O24 86.22(18) . . ?
 O8 U4 O36 88.87(18) . . ?
 O8 U4 O37 92.64(18) . . ?
 O21 U4 O19 49.62(14) . . ?
 O22 U4 O19 111.54(15) . . ?
 O22 U4 O21 62.06(15) . . ?
 O22 U4 O24 50.83(15) . . ?
 O24 U4 O19 159.64(14) . . ?
 O24 U4 O21 111.30(14) . . ?
 O36 U4 O19 131.73(15) . . ?
 O36 U4 O21 177.29(15) . . ?
 O36 U4 O22 116.72(16) . . ?
 O36 U4 O24 67.01(15) . . ?
 O37 U4 O19 64.90(15) . . ?
 O37 U4 O21 114.25(15) . . ?
 O37 U4 O22 169.48(16) . . ?
 O37 U4 O24 134.40(15) . . ?
 O37 U4 O36 67.40(16) . . ?
 O9 U5 U6 91.89(14) . . ?
 O9 U5 O10 177.6(2) . . ?
 O9 U5 O41 88.16(18) . . ?
 O9 U5 O42 92.42(18) . . ?
 O9 U5 O43 88.69(15) . . ?
 O9 U5 O44 81.66(18) . . ?
 O9 U5 O45 92.67(19) . . ?
 O10 U5 U6 90.19(15) . . ?
 O10 U5 O41 92.92(19) . . ?
 O10 U5 O42 89.96(18) . . ?
 O10 U5 O43 89.57(16) . . ?
 O10 U5 O44 96.26(19) . . ?
 O10 U5 O45 87.9(2) . . ?
 O41 U5 U6 34.08(11) . . ?
 O41 U5 O43 73.82(11) . . ?
 O41 U5 O44 145.09(15) . . ?
 O41 U5 O45 139.64(15) . . ?
 O42 U5 U6 33.31(11) . . ?
 O42 U5 O41 67.32(15) . . ?
 O42 U5 O43 141.06(11) . . ?
 O42 U5 O44 145.94(15) . . ?
 O42 U5 O45 72.33(15) . . ?
 O43 U5 U6 107.759(8) . . ?
 O43 U5 O44 72.65(11) . . ?
 O44 U5 U6 173.54(12) . . ?
 O45 U5 U6 105.62(11) . . ?
 O45 U5 O43 146.52(11) . . ?
 O45 U5 O44 74.47(15) . . ?
 O11 U6 O25 89.91(18) . . ?
 O11 U6 O27 91.82(18) . . ?
 O11 U6 O28 92.07(18) . . ?
 O11 U6 O30 89.21(18) . . ?
 O11 U6 O41 88.77(18) . . ?
 O11 U6 O42 94.06(18) . . ?
 O12 U6 O11 179.4(2) . . ?
 O12 U6 O25 89.81(18) . . ?
 O12 U6 O27 88.45(19) . . ?
 O12 U6 O28 88.57(18) . . ?
 O12 U6 O30 91.23(18) . . ?
 O12 U6 O41 90.59(19) . . ?
 O12 U6 O42 85.73(18) . . ?
 O25 U6 O28 111.37(15) . . ?
 O25 U6 O30 160.98(14) . . ?
 O27 U6 O25 50.95(15) . . ?
 O27 U6 O28 60.42(15) . . ?
 O27 U6 O30 110.09(14) . . ?
 O28 U6 O30 49.69(14) . . ?
 O41 U6 O25 67.70(15) . . ?
 O41 U6 O27 118.64(15) . . ?
 O41 U6 O28 178.75(15) . . ?
 O41 U6 O30 131.27(15) . . ?
 O42 U6 O25 134.77(15) . . ?
 O42 U6 O27 171.72(16) . . ?
 O42 U6 O28 113.47(15) . . ?
 O42 U6 O30 64.23(14) . . ?
 O42 U6 O41 67.37(15) . . ?
 N1 O13 U2 96.5(3) . . ?
 N1 O15 U2 98.3(3) . . ?
 N2 O16 U2 97.3(3) . . ?
 N2 O18 U2 98.0(3) . . ?
 N3 O19 U4 97.3(3) . . ?
 N3 O21 U4 98.1(3) . . ?
 N4 O22 U4 97.5(3) . . ?
 N4 O24 U4 96.5(4) . . ?
 N5 O25 U6 96.8(3) . . ?
 N5 O27 U6 98.0(3) . . ?
 N6 O28 U6 99.3(3) . . ?
 N6 O30 U6 97.2(3) . . ?
 U1 O31 H31 115(5) . . ?
 U2 O31 U1 111.87(18) . . ?
 U2 O31 H31 108(5) . . ?
 U1 O32 U2 112.56(17) . . ?
 U1 O32 H32 109(4) . . ?
 U2 O32 H32 113(4) . . ?
 U1 O33 H33A 131(7) . . ?
 U1 O33 H33B 117(5) . . ?
 H33A O33 H33B 110(8) . . ?
 U1 O34 H34A 130(4) . . ?
 U1 O34 H34B 116(4) . . ?
 H34A O34 H34B 114(5) . . ?
 U1 O35 H35A 114(10) . . ?
 U1 O35 H35B 123(5) . . ?
 H35A O35 H35B 106(10) . . ?
 U3 O36 H36 106(5) . . ?
 U4 O36 U3 112.74(19) . . ?
 U4 O36 H36 109(5) . . ?
 U3 O37 H37 106(4) . . ?
 U4 O37 U3 112.73(19) . . ?
 U4 O37 H37 114(4) . . ?
 U3 O38 H38A 113(4) . . ?
 U3 O38 H38B 127(4) . . ?
 H38A O38 H38B 119(6) . . ?
 U3 O39 H39A 121(5) . . ?
 U3 O39 H39B 102(5) . . ?
 H39A O39 H39B 115(7) . . ?
 U3 O40 H40A 122(6) . . ?
 U3 O40 H40B 103(6) . . ?
 H40A O40 H40B 118(10) . . ?
 U5 O41 H41 105(5) . . ?
 U6 O41 U5 111.52(18) . . ?
 U6 O41 H41 114(5) . . ?
 U5 O42 U6 113.67(18) . . ?
 U5 O42 H42 102(4) . . ?
 U6 O42 H42 119(4) . . ?
 U5 O43 H43A 141.471(6) . . ?
 U5 O43 H43B 113.533(6) . . ?
 H43A O43 H43B 104.305(3) . . ?
 U5 O44 H44A 111.2 . . ?
 U5 O44 H44B 110.5 . . ?
 H44A O44 H44B 103.0 . . ?
 U5 O45 H45A 131(4) . . ?
 U5 O45 H45B 124(6) . . ?
 H45A O45 H45B 102(7) . . ?
 H46A O46 H46B 95(6) . . ?
 H47A O47 H47B 128(9) . . ?
 H48A O48 H48B 112(7) . . ?
 O13 N1 U2 58.1(3) . . ?
 O14 N1 U2 177.8(5) . . ?
 O14 N1 O13 122.8(6) . . ?
 O14 N1 O15 122.7(6) . . ?
 O15 N1 U2 56.4(3) . . ?
 O15 N1 O13 114.5(5) . . ?
 O16 N2 O18 115.0(5) . . ?
 O17 N2 O16 122.7(5) . . ?
 O17 N2 O18 122.3(5) . . ?
 O19 N3 O21 114.9(5) . . ?
 O20 N3 O19 123.6(5) . . ?
 O20 N3 O21 121.5(5) . . ?
 O22 N4 U4 57.3(3) . . ?
 O22 N4 O24 115.1(5) . . ?
 O23 N4 U4 179.9(6) . . ?
 O23 N4 O22 122.6(6) . . ?
 O23 N4 O24 122.2(6) . . ?
 O24 N4 U4 57.8(3) . . ?
 O25 N5 U6 57.5(3) . . ?
 O26 N5 U6 177.2(4) . . ?
 O26 N5 O25 122.3(6) . . ?
 O26 N5 O27 123.5(5) . . ?
 O27 N5 U6 56.7(3) . . ?
 O27 N5 O25 114.1(5) . . ?
 O28 N6 O30 113.8(5) . . ?
 O29 N6 O28 123.8(5) . . ?
 O29 N6 O30 122.3(5) . . ?

loop_
  _geom_torsion_atom_site_label_1
  _geom_torsion_atom_site_label_2
  _geom_torsion_atom_site_label_3
  _geom_torsion_atom_site_label_4
  _geom_torsion
  _geom_torsion_site_symmetry_1
  _geom_torsion_site_symmetry_2
  _geom_torsion_site_symmetry_3
  _geom_torsion_site_symmetry_4
  _geom_torsion_publ_flag
 U2 O13 N1 O14 177.6(5) . . . . ?
 U2 O13 N1 O15 -2.5(5) . . . . ?
 U2 O15 N1 O13 2.5(5) . . . . ?
 U2 O15 N1 O14 -177.6(5) . . . . ?
 U2 O16 N2 O17 -178.1(5) . . . . ?
 U2 O16 N2 O18 2.2(5) . . . . ?
 U2 O18 N2 O16 -2.2(5) . . . . ?
 U2 O18 N2 O17 178.1(5) . . . . ?
 U4 O19 N3 O20 -177.6(5) . . . . ?
 U4 O19 N3 O21 3.3(5) . . . . ?
 U4 O21 N3 O19 -3.3(5) . . . . ?
 U4 O21 N3 O20 177.5(5) . . . . ?
 U4 O22 N4 O23 180.0(5) . . . . ?
 U4 O22 N4 O24 -0.6(5) . . . . ?
 U4 O24 N4 O22 0.6(5) . . . . ?
 U4 O24 N4 O23 -180.0(5) . . . . ?
 U6 O25 N5 O26 176.7(5) . . . . ?
 U6 O25 N5 O27 -3.7(5) . . . . ?
 U6 O27 N5 O25 3.7(5) . . . . ?
 U6 O27 N5 O26 -176.7(5) . . . . ?
 U6 O28 N6 O29 177.5(5) . . . . ?
 U6 O28 N6 O30 0.1(5) . . . . ?
 U6 O30 N6 O28 -0.1(5) . . . . ?
 U6 O30 N6 O29 -177.5(5) . . . . ?

_shelx_res_file
;
TITL mo_uco3_4_yel_a.res in P-1
    mo_uco3_4_yel.res
    created by SHELXL-2018/3 at 01:29:47 on 11-Oct-2020
CELL 0.71073 10.9048 10.9944 17.0902 73.445 89.421 86.382
ZERR 6 0.0002 0.0002 0.0003 0.002 0.001 0.001
LATT 1
SFAC H N O U
UNIT 60 12 96 12
EQIV $1 1-X,1-Y,1-Z
EQIV $2 2-X,3-Y,1-Z
EQIV $3 1-X,2-Y,2-Z
DFIX 0.98 H34a O34
DFIX 0.98 H47a O47
DFIX 0.98 H47b O47
DFIX 0.98 H38b O38
DFIX 0.98 O38 H38a
DFIX 0.98 O33 H33a
DFIX 0.98 H45a_$1 O45_$1
DFIX 0.98 H33b O33
DFIX 0.98 O31 H31
DFIX 0.98 H32 O32
DFIX 0.98 H36 O36
DFIX 0.98 0.04 O37 H37
DFIX 0.98 H48a O48
DFIX 0.98 O48 H48b
DFIX 0.98 H40a O40
DFIX 0.98 O40 H40b
DFIX 0.98 O39 H39b
DFIX 0.98 O39 H39a
DFIX 0.98 H35a O35
DFIX 0.98 O35 H35b
DFIX 0.98 O41 H41
DFIX 0.98 H42 O42
DFIX 0.98 H45b O45
DFIX 0.98 H34b O34
DFIX 0.98 H46a O46
DFIX 0.98 O46 H46b
DFIX 0.98 O43 H43a
DFIX 0.98 O43 H43b
EADP H34b H34a
EADP O40 O39
EADP O1 O2
DFIX 2.2 H40b H48a_$3
DFIX 2.2 H34b H46a_$2
EADP O20 O19
DFIX 2.2 H39b H48a

L.S. 20
PLAN  5
SIZE 0.25 0.13 0.1
TEMP -173(2)
CONF
CONN 8 $U
FREE U4 H37
HTAB
bond $h
fmap 2 53
acta
MORE -1
OMIT -4 55
REM <olex2.extras>
REM <restraints
REM  <item "olex2.restraint.angle 104 H43b O43 H43a">
REM >
REM <HklSrc "%.\\mo_UCO3_4_yel.hkl">
REM </olex2.extras>

WGHT    0.023800
FVAR       0.12875
U1    4    0.491440    1.262159    0.460541    11.00000    0.00640    0.00525 =
         0.00558   -0.00151    0.00006   -0.00003
U2    4    0.415782    1.160737    0.694890    11.00000    0.00597    0.00545 =
         0.00537   -0.00185    0.00021   -0.00057
U3    4    0.823910    1.060017    0.881833    11.00000    0.00679    0.00515 =
         0.00532   -0.00169   -0.00012    0.00020
U4    4    0.913926    1.159307    0.649253    11.00000    0.00556    0.00564 =
         0.00571   -0.00201    0.00023   -0.00038
U5    4    0.834093    1.585413    0.787117    11.00000    0.00604    0.00542 =
         0.00548   -0.00185   -0.00019    0.00030
U6    4    0.759673    1.515009    1.021040    11.00000    0.00549    0.00525 =
         0.00526   -0.00175    0.00034   -0.00062
O1    3    0.638379    1.180390    0.474616    11.00000    0.00728    0.00982 =
         0.01466   -0.00492   -0.00019    0.00393
O2    3    0.342068    1.339443    0.444690    11.00000    0.00728    0.00982 =
         0.01466   -0.00492   -0.00019    0.00393
O3    3    0.554337    1.065263    0.722848    11.00000    0.01127    0.00901 =
         0.01039   -0.00169   -0.00330    0.00245
O4    3    0.280527    1.258072    0.665429    11.00000    0.00553    0.01057 =
         0.01272   -0.00180   -0.00059    0.00213
O5    3    0.963565    0.969318    0.911427    11.00000    0.01168    0.01046 =
         0.01156   -0.00075   -0.00244    0.00246
O6    3    0.683619    1.151341    0.856967    11.00000    0.01009    0.00941 =
         0.00849    0.00064    0.00078   -0.00038
O7    3    1.050450    1.064258    0.681112    11.00000    0.00867    0.00917 =
         0.01579   -0.00414    0.00017   -0.00100
O8    3    0.774130    1.252066    0.619339    11.00000    0.00751    0.01165 =
         0.00749   -0.00232   -0.00232    0.00056
O9    3    0.973370    1.492022    0.807903    11.00000    0.00803    0.00858 =
         0.00994   -0.00153    0.00232   -0.00058
O10   3    0.693704    1.677736    0.762320    11.00000    0.01249    0.01826 =
         0.01134   -0.00773   -0.00174    0.00303
O11   3    0.895976    1.415797    1.051488    11.00000    0.00550    0.00563 =
         0.01440   -0.00019   -0.00362    0.00066
O12   3    0.624941    1.612280    0.990053    11.00000    0.01132    0.00734 =
         0.01326   -0.00214   -0.00124   -0.00221
O13   3    0.303994    0.961333    0.704309    11.00000    0.01001    0.00853 =
         0.00982   -0.00462    0.00143   -0.00258
O14   3    0.199731    0.862675    0.810148    11.00000    0.01175    0.01117 =
         0.01163    0.00227    0.00282   -0.00501
O15   3    0.298809    1.027659    0.811461    11.00000    0.01591    0.01106 =
         0.01218   -0.00604    0.00249   -0.00900
O16   3    0.419610    1.208938    0.833203    11.00000    0.00608    0.00948 =
         0.01624   -0.00060   -0.00095   -0.00533
O17   3    0.512212    1.364115    0.857854    11.00000    0.01024    0.01297 =
         0.01451   -0.01035   -0.00199   -0.00011
O18   3    0.511032    1.339969    0.735845    11.00000    0.01491    0.00768 =
         0.00712    0.00049   -0.00258   -0.00214
O19   3    0.812021    0.982806    0.606357    11.00000    0.01092    0.01544 =
         0.00706   -0.00805    0.00076   -0.00103
O20   3    0.816760    0.960566    0.483052    11.00000    0.01092    0.01544 =
         0.00706   -0.00805    0.00076   -0.00103
O21   3    0.915481    1.107890    0.512621    11.00000    0.00974    0.01357 =
         0.00652   -0.00361    0.00235   -0.00620
O22   3    1.044475    1.286265    0.537080    11.00000    0.01578    0.00801 =
         0.01355   -0.00308    0.00756   -0.00114
O23   3    1.122624    1.464867    0.534838    11.00000    0.01464    0.00511 =
         0.02068    0.00280    0.00402   -0.00346
O24   3    1.009599    1.366891    0.637320    11.00000    0.00957    0.01030 =
         0.01025   -0.00612    0.00196   -0.00160
O25   3    0.638005    1.322174    1.045774    11.00000    0.01332    0.01030 =
         0.01068   -0.00522    0.00306    0.00019
O26   3    0.537914    1.240200    1.157687    11.00000    0.01127    0.01366 =
         0.00936   -0.00052    0.00192   -0.00500
O27   3    0.650952    1.400896    1.146600    11.00000    0.01693    0.01397 =
         0.01115   -0.00529   -0.00100   -0.00497
O28   3    0.765453    1.593476    1.146253    11.00000    0.01174    0.00803 =
         0.00906   -0.00182    0.00349   -0.00520
O29   3    0.860043    1.756473    1.158448    11.00000    0.01682    0.01483 =
         0.01437   -0.01156   -0.00222    0.00148
O30   3    0.868921    1.700214    1.045928    11.00000    0.01740    0.01527 =
         0.00316   -0.00248    0.00094   -0.00665
O31   3    0.417446    1.101000    0.572013    11.00000    0.00690    0.00666 =
         0.00859   -0.00254   -0.00057   -0.00312
H31   1    0.334970    1.075041    0.563838    11.00000    0.04891
O32   3    0.515889    1.304726    0.587131    11.00000    0.00720    0.00514 =
         0.00330   -0.00097    0.00167   -0.00286
H32   1    0.603785    1.308128    0.597459    11.00000    0.02343
O33   3    0.426664    1.103996    0.400138    11.00000    0.01216    0.00656 =
         0.00911   -0.00401    0.00090   -0.00296
H33A  1    0.345513    1.079170    0.390729    11.00000    0.07656
H33B  1    0.488407    1.038460    0.395375    11.00000    0.04193
O34   3    0.533527    1.333828    0.314545    11.00000    0.01865    0.01984 =
         0.00973   -0.00435    0.00230   -0.01113
H34A  1    0.493060    1.315519    0.269770    11.00000    0.00353
H34B  1    0.605719    1.378346    0.299209    11.00000    0.00353
O35   3    0.592452    1.459138    0.431197    11.00000    0.01501    0.00926 =
         0.01026   -0.00110    0.00081   -0.00099
H35A  1    0.647869    1.473537    0.384363    11.00000    0.25442
H35B  1    0.549818    1.540354    0.427704    11.00000    0.03857
O36   3    0.908250    1.216457    0.772347    11.00000    0.00977    0.01061 =
         0.01384   -0.00575   -0.00255    0.00039
H36   1    0.991358    1.225255    0.788625    11.00000    0.03313
O37   3    0.818922    1.009520    0.755790    11.00000    0.00668    0.01442 =
         0.00931   -0.00476   -0.00267   -0.00111
H37   1    0.735205    1.000034    0.745945    11.00000    0.01333
O38   3    0.887003    1.219868    0.940943    11.00000    0.00656    0.00978 =
         0.01454   -0.00423   -0.00323    0.00202
H38A  1    0.829617    1.295931    0.928417    11.00000    0.01148
H38B  1    0.966643    1.223235    0.965071    11.00000    0.01274
O39   3    0.736530    1.005128    1.018871    11.00000    0.02078    0.00735 =
         0.00947   -0.00086    0.00324   -0.00341
H39A  1    0.786465    1.000470    1.066476    11.00000    0.02517
H39B  1    0.663734    1.063323    1.011531    11.00000    0.05080
O40   3    0.710723    0.874151    0.896689    11.00000    0.02078    0.00735 =
         0.00947   -0.00086    0.00324   -0.00341
H40A  1    0.750464    0.792987    0.895009    11.00000    0.05261
H40B  1    0.655329    0.875098    0.941595    11.00000    0.22924
O41   3    0.749659    1.440622    0.904149    11.00000    0.01213    0.00846 =
         0.01046   -0.00429   -0.00088   -0.00408
H41   1    0.666418    1.430044    0.887998    11.00000    0.03103
O42   3    0.850544    1.650425    0.905515    11.00000    0.00491    0.00667 =
         0.01236   -0.00630   -0.00134   -0.00036
H42   1    0.937389    1.663008    0.906731    11.00000    0.00177
O43   3   10.750780   11.422729   10.739659    11.00000    0.01543    0.01128 =
         0.01261   -0.00714   -0.00300   -0.00613
H43A  1   10.673901   11.397990   10.722569    11.00000    0.02344
H43B  1   10.806990   11.349110   10.745210    11.00000    0.04781
O44   3    0.903218    1.615748    0.644658    11.00000    0.02169    0.00989 =
         0.01057   -0.00365   -0.00176   -0.00401
AFIX   7
H44A  1    0.840518    1.636759    0.610128    11.00000   -1.50000
H44B  1    0.933168    1.543178    0.637868    11.00000   -1.50000
AFIX   0
O45   3    0.936297    1.779773    0.751518    11.00000    0.01473    0.01176 =
         0.00785   -0.00492    0.00518   -0.00498
H45A  1    0.911873    1.863565    0.757783    11.00000    0.00932
H45B  1    1.002451    1.798453    0.711780    11.00000    0.04655

O46   3    1.250481    1.555278    0.687710    11.00000    0.01551    0.01586 =
         0.01412   -0.00067    0.00336    0.00341
H46A  1    1.194711    1.630776    0.683426    11.00000    0.02830
H46B  1    1.219243    1.505994    0.739550    11.00000    0.02969
O47   3    1.131027    0.792014    0.658016    11.00000    0.01837    0.01315 =
         0.01457   -0.00615    0.00435   -0.00853
H47A  1    1.187917    0.839725    0.679592    11.00000    0.14188
H47B  1    1.099375    0.810227    0.603103    11.00000    0.00779
O48   3    0.504570    1.128412    1.012406    11.00000    0.01631    0.01445 =
         0.01298   -0.00674    0.00441   -0.00547
H48A  1    0.521442    1.208380    1.021996    11.00000    0.05175
H48B  1    0.484624    1.138450    0.955761    11.00000    0.03016
N1    2    0.264087    0.946194    0.777017    11.00000    0.00512    0.01113 =
         0.01110   -0.00038    0.00034   -0.00034
N2    2    0.482343    1.306668    0.811144    11.00000    0.00954    0.00770 =
         0.00356   -0.00051   -0.00345    0.00193
N3    2    0.845817    1.014347    0.532195    11.00000    0.00599    0.01440 =
         0.01412   -0.01147   -0.00061   -0.00056
N4    2    1.061988    1.376204    0.568094    11.00000    0.01160    0.01207 =
         0.01146   -0.00742    0.00280   -0.00136
N5    2    0.605316    1.317595    1.119055    11.00000    0.00780    0.00592 =
         0.00931    0.00099    0.00614    0.00124
N6    2    0.833632    1.685504    1.119733    11.00000    0.00877    0.00756 =
         0.00795   -0.00254    0.00169   -0.00062
HKLF 4


REM  mo_uco3_4_yel_a.res in P-1
REM wR2 = 0.0608, GooF = S = 1.018, Restrained GooF = 1.017 for all data
REM R1 = 0.0287 for 6988 Fo > 4sig(Fo) and 0.0439 for all 9006 data
REM 626 parameters refined using 31 restraints

END

WGHT      0.0238      0.0000

REM Instructions for potential hydrogen bonds
EQIV $4 -x+1, -y+2, -z+1
HTAB O31 O20_$4
HTAB O32 O8
HTAB O33 O19_$4
HTAB O33 N3_$4
HTAB O33 O3_$4
HTAB O33 O31_$4
EQIV $5 -x+1, -y+3, -z+1
HTAB O34 O10_$5
EQIV $6 x, y, z-1
HTAB O34 O26_$6
HTAB O34 O46_$2
HTAB O35 O46_$2
HTAB O35 O32_$5
EQIV $7 -x+2, -y+3, -z+2
HTAB O36 O29_$7
HTAB O37 O3
HTAB O38 O41
EQIV $8 -x+2, -y+2, -z+2
HTAB O38 O5_$8
HTAB O38 O30_$7
HTAB O38 N6_$7
HTAB O39 O15_$3
HTAB O39 O48
EQIV $9 x, y-1, z
HTAB O40 O42_$9
HTAB O40 O48_$3
HTAB O41 O17
HTAB O42 O11_$7
HTAB O43 O18
HTAB O43 N2
HTAB O43 O36
HTAB O44 O2_$5
HTAB O44 O24
EQIV $10 x, y+1, z
HTAB O45 O37_$10
HTAB O45 O47_$10
HTAB O46 O47_$10
HTAB O46 O28_$7
EQIV $11 x+1, y, z
HTAB O47 O13_$11
HTAB O47 O14_$11
HTAB O47 N1_$11
EQIV $12 -x+2, -y+2, -z+1
HTAB O47 O21_$12
HTAB O47 N3_$12
EQIV $13 -x+1, -y+3, -z+2
HTAB O48 O12_$13
HTAB O48 O25
HTAB O48 O26
HTAB O48 N5
HTAB O48 O16
HTAB O48 O17
HTAB O48 N2

REM Highest difference peak  1.279,  deepest hole -1.364,  1-sigma level  0.266
Q1    1   0.5766  1.2210  0.4593  11.00000  0.05    1.28
Q2    1   0.8463  1.1990  0.6552  11.00000  0.05    1.19
Q3    1   0.7466  1.1131  0.8745  11.00000  0.05    1.12
Q4    1   0.9936  1.0566  0.6607  11.00000  0.05    1.10
Q5    1   0.4978  1.1048  0.6843  11.00000  0.05    1.09
;
_shelx_res_checksum                18398
_shelx_hkl_file
;
   0   0  -2-0.38033 1.72689   3
   0   0  -3 63.9571 4.35066   3
   0   0  -3 74.6121 2.96096   2
   0   0   3 73.3281 3.55883   1
   0   0   3 65.4531 2.69047   2
   0   0  -3 61.5867 4.08809   2
   0   0  -4 39.6756 4.26618   2
   0   0  -4 37.5284 2.76435   2
   0   0   4 52.1998 3.81415   1
   0   0  -4 41.8092 4.71439   3
   0   0  -4 43.3443 2.93770   1
   0   0  -4 45.4280 3.45209   1
   0   0  -5 65.9697 4.05851   1
   0   0  -5 49.5931 5.29584   2
   0   0   5 64.2747 4.77648   1
   0   0  -5 57.2499 3.43026   1
   0   0  -5 65.9636 3.81551   2
   0   0  -5 78.1507 6.52923   3
   0   0  -6 964.397 13.4239   2
   0   0  -6 954.074 12.6444   1
   0   0  -6 948.387 19.7516   3
   0   0  -6 853.993 17.7275   2
   0   0   6 970.806 16.3558   1
   0   0  -6 933.210 11.5580   1
   0   0  -7 11.4430 2.73287   1
   0   0  -7 15.6236 5.44895   2
   0   0  -7 15.6512 5.59882   3
   0   0  -7 16.0738 3.04668   2
   0   0   7 20.3432 4.36155   1
   0   0  -8 9.14362 5.33866   3
   0   0  -8 9.80791 3.04149   2
   0   0  -8 12.5469 5.38638   2
   0   0  -8 14.1500 2.38870   1
   0   0   8 12.9438 4.39947   1
   0   0  -9 2615.48 40.1108   3
   0   0  -9 2535.65 16.8637   1
   0   0  -9 2519.22 16.4935   1
   0   0  -9 2604.77 27.6527   2
   0   0   9 2562.27 34.0025   1
   0   0  -9 2530.06 37.5062   2
   0   0 -10 13.1567 3.74997   2
   0   0 -10 6.92627 5.08895   2
   0   0 -10 13.0236 6.17169   3
   0   0  10 15.2059 5.40012   1
   0   0 -11 3.86886 3.48653   2
   0   0 -11 1.45543 6.79111   3
   0   0  11 9.20860 5.01487   1
   0   0 -11 2.20310 5.77914   2
   0   0 -12 1538.00 25.5270   2
   0   0 -12 1443.05 33.9219   2
   0   0  12 1493.94 31.8490   1
   0   0 -12 1500.19 36.6601   3
   0   0  13 6.04860 6.35147   1
   0   0 -13 5.60628 3.68831   2
   0   0 -13 9.10144 7.48350   2
   0   0 -13 7.42799 8.05752   3
   0   0 -14 20.3954 5.05246   2
   0   0 -14 25.8248 10.3511   3
   0   0  14 20.3158 8.02760   1
   0   0 -14 22.1506 8.54932   2
   0   0  15 7.23794 6.96081   1
   0   0 -15 5.75102 8.90746   2
   0   0 -15-4.65260 9.12683   3
   0   0 -16 203.494 18.1712   3
   0   0  16 212.297 16.3069   1
   0   0 -16 168.485 16.3562   2
   0   0 -17 221.185 18.1606   2
   0   0  17 243.038 18.3414   1
   0   0 -17 270.885 21.7720   3
   0   0 -18 199.720 18.4819   2
   0   0 -19-1.86565 10.9901   2
   0   0 -20 25.2200 12.3202   2
   0   0 -21 1627.38 52.1033   2
   0   0 -22 252.426 24.2288   2
   0   0 -23 27.6048 14.6300   2
   0   0 -24 22.9581 13.6651   2
   0   0 -25 159.480 21.3300   2
   0   0 -26 161.533 23.0496   2
   0   1 -26 349.798 29.0391   2
   0   1 -25 739.306 40.1219   2
   0   1 -24 15.1524 12.7183   2
   0   1 -23 8.79090 13.1461   2
   0   1 -22 315.793 25.6606   2
   0   1 -21 166.440 19.6053   2
   0   1 -20 171.529 19.3526   2
   0   1 -19 14.8575 11.3754   2
   0   1 -18 8.05298 10.0171   2
   0   1 -17 137.180 16.1586   2
   0  -1  16 1893.25 46.7619   1
   0   1 -16 1896.78 47.3004   2
   0  -1  15 43.1039 9.42205   1
   0   1 -15 51.1475 11.2843   2
   0  -1  14 28.6025 8.62220   1
   0   1 -14 37.5413 9.53935   2
   0   1 -13 69.5415 10.5042   2
   0   1 -13 85.3119 7.51711   2
   0  -1  13 53.3803 8.97061   1
   0  -1  12 36.9991 7.75343   1
   0   1 -12 28.6554 8.33062   2
   0   1 -12 47.4756 5.64734   2
   0   1 -11 55.4248 8.76413   2
   0   1 -11 43.5502 5.30849   2
   0   1 -11 30.0825 8.62949   3
   0  -1  11 40.3658 7.06241   1
   0   1 -10 75.3254 8.82424   2
   0  -1  10 59.8092 7.61050   1
   0   1 -10 64.2325 9.51602   3
   0   1 -10 66.5296 5.82084   2
   0   1 -10 68.4448 3.29400   1
   0   1  -9 4.66072 2.23633   1
   0  -1   9 17.7294 5.42864   1
   0   1  -9 1.20229 6.52568   3
   0   1  -9 3.26183 5.37664   2
   0   1  -9 6.17939 3.48217   2
   0   1  -8 95.9584 8.31382   2
   0   1  -8 97.2557 9.62069   3
   0   1  -8 97.1438 4.94635   1
   0   1  -8 101.816 6.28468   2
   0  -1   8 115.880 8.47386   1
   0   1  -8 98.5469 4.83984   1
   0   1  -8 86.7415 4.76562   1
   0  -1   7 114.906 8.01341   1
   0   1  -7 114.904 6.21414   2
   0   1  -7 120.053 5.51227   1
   0   1  -7 121.545 8.62883   2
   0   1  -7 119.623 5.61986   1
   0   1  -7 125.288 9.76171   3
   0  -1   6-0.45607 4.07721   1
   0   1  -6 1.68557 2.48205   2
   0   1  -6 3.51966 2.72240   1
   0   1  -6 2.40821 2.90068   1
   0   1  -6 2.66140 4.99507   3
   0   1  -6 2.45913 4.49219   2
   0   1  -5 52.9452 3.96560   2
   0   1  -5 47.3576 6.46586   3
   0   1  -5 43.0916 5.28770   2
   0   1  -5 53.6639 4.23697   1
   0  -1   5 44.4688 5.26829   1
   0   1  -4 7241.75 36.6670   1
   0   1  -4 7322.04 44.4900   2
   0   1  -4 7098.56 34.4383   2
   0  -1   4 7175.69 43.1179   1
   0  -1   3-0.40837 2.87362   1
   0   1  -3 3.02442 2.57894   1
   0  -1   3 1.89402 1.59541   2
   0   1  -3-1.45679 3.06545   2
   0  -1   2 4.78455 2.68473   1
   0  -1   2-1.87099 1.36804   2
   0   1  -2-0.71228 2.38831   2
   0   1  -2-0.47781 2.37840   1
   0   1  -1 2313.25 16.3304   1
   0   1  -1 2306.06 16.6880   1
   0   1  -1 2164.66 17.0362   2
   0  -1   1 2327.51 18.4807   1
   0   1   0 4.75816 1.40218   1
   0  -1   0 2.97669 1.46028   2
   0   1   0 0.52460 0.92712   2
   0  -1   0 0.48500 1.53676   1
   0   1   1-0.43486 1.15173   1
   0  -1  -1-1.18516 1.54981   1
   0   1   1 3.15470 0.87354   2
   0  -1  -1 5.44670 2.35252   1
   0  -1  -2 907.736 12.9956   1
   0  -1  -2 892.596 9.38410   1
   0   1   2 908.505 9.46237   1
   0   1   2 859.533 7.98908   2
   0  -1  -3-0.77240 1.84549   1
   0  -1  -3 1.41370 1.51410   2
   0  -1  -3-0.39065 3.20002   1
   0  -1  -3 0.95137 2.62648   3
   0   1   3-0.77574 1.78035   1
   0   1   3 2.83416 1.45584   2
   0  -1  -4 2.50705 3.39715   3
   0  -1  -4-0.70736 1.93826   1
   0   1   4 0.22835 2.19471   1
   0  -1  -4 3.82268 3.18540   1
   0  -1  -4 3.71527 1.93634   2
   0  -1  -5 9322.70 41.7437   1
   0  -1  -5 9281.52 36.9380   2
   0  -1  -5 9193.98 53.5349   3
   0  -1  -5 9302.84 34.4251   1
   0   1   5 9157.32 41.1921   1
   0   1   6 2.50454 2.67651   1
   0  -1  -6 6.55996 2.28443   2
   0  -1  -6 3.11638 2.09739   1
   0  -1  -6 1.86835 4.27436   3
   0  -1  -6 4.12659 3.02593   1
   0  -1  -7 2.11253 2.47834   2
   0   1   7 8.41926 3.37992   1
   0  -1  -7-0.06591 4.53301   3
   0  -1  -7 3.11909 2.60841   1
   0  -1  -8 796.184 14.1375   2
   0  -1  -8 777.421 20.6742   3
   0  -1  -8 768.128 19.0165   2
   0   1   8 774.865 16.3578   1
   0  -1  -8 773.361 11.2783   1
   0  -1  -9 70.3026 7.94109   2
   0  -1  -9 57.9813 7.57828   3
   0  -1  -9 69.8109 3.42400   1
   0  -1  -9 73.9395 5.26547   2
   0   1   9 70.5260 6.19256   1
   0  -1 -10 124.798 10.6456   3
   0  -1 -10 151.128 7.47778   2
   0   1  10 139.394 8.91146   1
   0  -1 -10 128.198 9.89936   2
   0  -1 -11 86.7150 9.73792   2
   0  -1 -11 59.9782 8.83368   3
   0   1  11 91.9500 7.94439   1
   0  -1 -12 63.4480 9.58100   3
   0  -1 -12 78.7508 6.69307   2
   0   1  12 74.8877 8.15616   1
   0  -1 -12 71.3264 9.66497   2
   0   1  13 113.485 10.0699   1
   0  -1 -13 126.787 12.4034   2
   0  -1 -13 133.420 8.56953   2
   0  -1 -13 124.622 13.0387   3
   0  -1 -14 190.587 10.3998   2
   0   1  14 186.423 13.2417   1
   0  -1 -14 190.977 15.7494   3
   0  -1 -14 204.988 15.5566   2
   0  -1 -15-0.32307 8.49196   3
   0   1  15 6.28532 6.68706   1
   0  -1 -15 8.96978 8.37330   2
   0  -1 -16 36.3745 10.6059   3
   0   1  16 19.7056 8.46332   1
   0  -1 -16 27.7434 9.44630   2
   0   1  17 2617.40 52.9758   1
   0  -1 -17 2553.08 58.4149   3
   0  -1 -18 56.6750 13.7675   3
   0  -1 -18 62.0979 13.2505   2
   0  -1 -19 31.6305 12.2113   2
   0  -1 -19 33.4029 13.1434   3
   0  -1 -20 27.1436 13.5375   3
   0  -1 -20 15.8748 11.6759   2
   0  -1 -21 287.525 23.8879   2
   0  -1 -22 271.767 24.1352   2
   0  -1 -23 300.087 25.7558   2
   0  -1 -24 0.27800 13.0940   2
   0  -1 -25-4.36453 13.8421   2
   0  -1 -26 654.242 38.7696   2
   0   2 -25 104.638 20.2907   2
   0   2 -24 266.398 27.0995   2
   0   2 -23 5.22222 12.2744   2
   0   2 -22 41.1483 14.4990   2
   0   2 -21 260.208 23.2791   2
   0   2 -20 1418.81 48.3891   2
   0   2 -19 45.2886 13.6215   2
   0   2 -18-7.90911 11.0298   2
   0   2 -17 160.651 16.7664   2
   0  -2  16 313.957 21.4971   1
   0   2 -16 311.474 20.8382   2
   0   2 -15 67.3367 11.5634   2
   0  -2  15 92.1824 12.4624   1
   0   2 -14 85.5877 12.3169   2
   0  -2  14 51.0156 9.83365   1
   0  -2  13 5.54389 7.23688   1
   0   2 -13 4.51181 7.06781   2
   0   2 -12 19.6806 5.26570   2
   0   2 -12 10.2216 6.51271   2
   0  -2  12 5.07982 6.31839   1
   0  -2  11 774.544 25.0641   1
   0   2 -11 719.012 9.80855   1
   0   2 -11 825.502 26.0836   2
   0   2 -11 839.802 20.0691   2
   0   2 -11 721.643 10.2557   1
   0   2 -10 116.841 7.98802   2
   0   2 -10 106.920 5.31350   1
   0  -2  10 115.687 10.2421   1
   0   2 -10 119.952 11.1325   2
   0   2  -9 238.771 10.2697   2
   0  -2   9 265.591 13.8647   1
   0   2  -9 243.369 13.4285   2
   0   2  -9 266.785 8.69585   1
   0   2  -8 2690.98 30.9190   2
   0   2  -8 2832.36 27.4966   1
   0   2  -8 2694.50 39.7603   2
   0  -2   8 2759.89 39.6822   1
   0   2  -7 23.0908 5.46786   2
   0   2  -7 25.8113 4.14059   2
   0  -2   7 16.2741 5.10704   1
   0   2  -7 28.1426 4.08214   1
   0   2  -6 3.04589 3.10400   1
   0   2  -6 7.75522 3.39802   2
   0  -2   6 1.83676 4.18234   1
   0   2  -6-1.29794 3.03614   1
   0   2  -6 1.85914 4.62812   2
   0  -2   5 1425.59 24.3118   1
   0   2  -5 1509.38 19.6775   2
   0   2  -5 1490.02 20.0992   1
   0   2  -5 1396.38 24.3517   2
   0   2  -5 1466.92 20.4962   1
   0   2  -4 28.9476 5.12778   2
   0  -2   4 38.4101 5.47046   1
   0   2  -4 28.7818 4.18662   1
   0   2  -4 36.0778 4.56589   1
   0   2  -3 76.5972 5.54959   1
   0  -2   3 90.9669 6.63696   1
   0   2  -3 74.9965 5.32706   1
   0   2  -3 81.8281 6.26209   2
   0   2  -2 266.949 8.46076   1
   0   2  -2 259.588 8.57977   1
   0  -2   2 286.990 10.1511   1
   0   2  -2 264.811 8.86375   2
   0   2  -1 1.52402 3.35891   1
   0   2  -1 4.58482 3.19151   1
   0  -2   1 2.14813 4.12591   1
   0   2  -1 3.99875 2.74250   2
   0   2   0 34.0073 3.84456   1
   0  -2   0 36.0700 4.96715   1
   0   2   0 40.0586 3.46800   2
   0  -2  -1 12353.5 60.8831   1
   0   2   1 12137.1 48.5330   1
   0   2   2 24.3686 2.41579   2
   0  -2  -2 22.2086 5.05552   1
   0   2   2 23.0065 3.35178   1
   0   2   3 3.48577 2.74583   1
   0   2   3 1.31376 1.94870   2
   0  -2  -3 4.88634 5.20132   1
   0   2   4 787.439 12.8221   1
   0  -2  -4 764.046 17.1316   1
   0   2   4 749.921 10.4447   2
   0   2   5 21.1595 3.51277   1
   0  -2  -5 10.3409 2.65238   2
   0  -2  -5 16.2131 5.29824   1
   0  -2  -6 199.598 9.90969   3
   0   2   6 186.700 7.39173   1
   0  -2  -6 198.891 6.62760   2
   0  -2  -6 204.781 9.12387   1
   0  -2  -7 557.204 11.3187   2
   0  -2  -7 600.874 13.7212   1
   0   2   7 582.359 13.2288   1
   0  -2  -7 574.469 16.6897   3
   0  -2  -8 28.5250 3.72902   2
   0   2   8 24.9670 4.22125   1
   0  -2  -8 25.4594 3.19895   1
   0  -2  -8 34.1436 6.25667   3
   0  -2  -8 24.7859 4.13603   1
   0  -2  -9 19.2345 6.36220   3
   0  -2  -9 15.0524 3.33338   2
   0   2   9 17.9678 4.41811   1
   0  -2  -9 20.3838 3.56453   1
   0  -2 -10 3174.42 31.6364   2
   0   2  10 3040.32 36.5014   1
   0  -2 -10 3175.35 46.4497   3
   0  -2 -10 3088.31 21.5609   1
   0   2  11 1.74412 4.34983   1
   0  -2 -11 2.56859 3.34868   2
   0  -2 -11 2.31296 6.14855   3
   0   2  12 30.3200 5.93732   1
   0  -2 -12 20.4545 7.06892   2
   0  -2 -12 23.6073 7.61781   3
   0  -2 -12 24.0444 4.78463   2
   0  -2 -13 2455.14 47.1983   3
   0  -2 -13 2544.40 33.2394   2
   0   2  13 2350.40 39.1138   1
   0  -2 -13 2350.41 44.0702   2
   0  -2 -14 15.8699 8.65626   3
   0  -2 -14 11.2918 8.08084   2
   0   2  14 16.9665 6.42580   1
   0  -2 -14 7.94569 4.30714   2
   0  -2 -15 15.8220 9.38563   3
   0   2  15-0.77932 6.77681   1
   0  -2 -15 0.44692 7.98439   2
   0   2  16 122.533 12.2253   1
   0  -2 -16 107.022 14.0417   3
   0  -2 -16 122.578 14.4482   2
   0   2  17 273.186 18.1167   1
   0  -2 -17 260.444 19.9515   2
   0  -2 -17 264.418 20.4478   3
   0  -2 -18 98.8247 14.3422   2
   0  -2 -18 108.747 15.3166   3
   0  -2 -19 115.731 15.9760   2
   0  -2 -19 118.464 17.0128   3
   0  -2 -20 29.1580 12.2413   2
   0  -2 -20 10.4921 13.0520   3
   0  -2 -21-1.05663 10.6040   2
   0  -2 -22 1949.22 58.5208   2
   0  -2 -23 143.801 20.7888   2
   0  -2 -24-3.87278 13.1114   2
   0  -2 -25-4.50812 13.2884   2
   0  -2 -26 227.660 26.0480   2
   0  -2 -27 104.042 21.3670   2
   0   3 -24 667.463 39.0991   2
   0   3 -23 8.07974 13.5074   2
   0   3 -22 20.5531 12.9558   2
   0   3 -21 446.317 30.4268   2
   0   3 -20 243.751 22.7208   2
   0   3 -19 151.291 18.0103   2
   0   3 -18 0.10751 10.2799   2
   0   3 -17 36.4810 11.5591   2
   0  -3  16 80.7681 13.3981   1
   0   3 -16 83.6289 13.7078   2
   0  -3  15 1273.48 40.7508   1
   0   3 -15 1388.15 41.2088   2
   0  -3  14 99.2559 13.3665   1
   0   3 -14 78.0864 12.0940   2
   0  -3  13 154.935 15.4014   1
   0   3 -13 136.765 13.7446   2
   0  -3  12 345.648 19.6625   1
   0   3 -12 412.286 20.5433   2
   0   3 -11 47.5401 8.67690   2
   0   3 -11 57.3052 4.64039   1
   0  -3  11 52.3177 9.11423   1
   0   3 -11 47.1357 6.10012   2
   0   3 -10 2.45528 4.45647   2
   0   3 -10 1.19472 3.29446   1
   0   3 -10 6.70810 6.04531   2
   0  -3  10 6.56875 7.16554   1
   0   3  -9 1116.06 22.7288   2
   0  -3   9 1152.89 29.9427   1
   0   3  -9 1136.73 19.6540   1
   0   3  -9 1128.22 29.2757   2
   0  -3   8 138.938 11.4893   1
   0   3  -8 131.828 7.62012   1
   0   3  -8 128.678 10.7495   2
   0   3  -8 103.180 7.31841   2
   0  -3   7 20.4800 6.64491   1
   0   3  -7 12.5779 5.51505   2
   0   3  -7 21.2677 4.12123   1
   0   3  -7 28.5735 4.63432   2
   0   3  -6 216.903 9.38532   1
   0  -3   6 207.337 12.4125   1
   0   3  -6 224.521 11.7193   2
   0   3  -5 30.8897 6.34578   2
   0   3  -5 43.2704 5.20368   1
   0  -3   5 55.3359 7.21139   1
   0   3  -4 133.264 8.51498   2
   0  -3   4 132.514 9.54612   1
   0   3  -4 171.211 8.41642   1
   0   3  -3 6496.95 46.9608   1
   0  -3   3 6523.10 56.3024   1
   0   3  -3 6522.92 49.3981   2
   0   3  -2 75.2899 6.18720   2
   0  -3   2 81.2882 7.62452   1
   0   3  -2 87.6973 6.67180   1
   0   3  -2 103.471 5.43696   2
   0   3  -1 6.24546 4.21118   1
   0  -3   1 0.26480 5.04331   1
   0   3  -1 9.12783 3.56407   2
   0  -3   0 625.689 17.3850   1
   0   3   0 640.189 14.4594   1
   0   3   0 627.118 13.0203   2
   0   3   1 2.63515 3.61329   1
   0   3   1 3.70183 2.82486   2
   0  -3  -1-0.84601 5.92067   1
   0   3   2 5.67945 3.58340   1
   0  -3  -2 10.2139 6.04334   1
   0   3   2 5.61279 2.68623   2
   0  -3  -3 344.943 9.01362   2
   0   3   3 378.398 8.80313   2
   0   3   3 358.830 10.6308   1
   0  -3  -3 355.072 14.8330   1
   0   3   4 4.24226 2.47996   2
   0   3   4 4.27133 3.35586   1
   0  -3  -4 13.2633 6.91155   1
   0  -3  -5 6.41452 5.98817   1
   0   3   5 9.21140 3.71718   1
   0   3   5 6.92425 2.43668   2
   0  -3  -6 10137.0 70.9365   1
   0   3   6 10065.8 55.8119   1
   0  -3  -7 37.8844 6.21737   3
   0  -3  -7 33.2755 6.38452   1
   0  -3  -7 22.6436 3.67347   2
   0   3   7 29.1747 4.49430   1
   0  -3  -8 41.9710 5.94966   1
   0  -3  -8 31.6370 4.02802   2
   0   3   8 35.7344 4.87958   1
   0  -3  -8 22.2324 6.29693   3
   0  -3  -9 951.632 17.1751   2
   0  -3  -9 904.361 18.8157   1
   0  -3  -9 912.851 24.3856   3
   0   3   9 948.436 20.0156   1
   0   3  10 74.0800 6.74831   1
   0  -3 -10 73.1466 5.73416   2
   0  -3 -10 76.4264 5.14977   1
   0  -3 -10 96.8367 10.0583   3
   0  -3 -10 71.3451 4.80621   1
   0  -3 -10 83.8629 6.13347   1
   0   3  11 22.6164 5.37694   1
   0  -3 -11 25.8966 4.41741   2
   0  -3 -11 16.2675 3.29222   1
   0  -3 -11 23.5960 7.45703   3
   0  -3 -12 63.3745 6.12693   2
   0   3  12 67.3378 7.51983   1
   0  -3 -12 53.6580 9.50394   3
   0  -3 -13 133.092 8.33267   2
   0   3  13 132.694 10.3791   1
   0  -3 -13 155.710 13.6359   3
   0  -3 -14 220.725 10.9655   2
   0  -3 -14 197.915 16.1455   3
   0   3  14 227.503 13.5928   1
   0  -3 -14 224.494 15.5898   2
   0   3  15 23.1290 6.95204   1
   0  -3 -15 18.0807 8.62079   2
   0  -3 -15 26.4335 10.2116   3
   0  -3 -16 30.0136 10.5886   3
   0   3  16 43.7710 9.38511   1
   0  -3 -16 22.7589 9.72896   2
   0  -3 -17 14.4812 8.84221   2
   0  -3 -17 25.5528 10.8961   3
   0   3  17-1.42647 6.73111   1
   0  -3 -18 2316.38 55.2592   2
   0  -3 -18 2345.23 56.9491   3
   0  -3 -19 26.3938 12.0738   3
   0  -3 -19 21.4270 11.5282   2
   0  -3 -20 32.6916 13.0805   2
   0  -3 -20 20.1473 11.6167   3
   0  -3 -21 56.6182 14.8019   2
   0  -3 -21 96.0800 17.6179   3
   0  -3 -22 362.324 26.5499   2
   0  -3 -23 295.964 25.6169   2
   0  -3 -24 197.362 23.3946   2
   0  -3 -25-5.61458 14.6980   2
   0  -3 -26 20.7901 14.7329   2
   0  -3 -27 566.278 37.9080   2
   0   4 -24 174.492 22.8527   2
   0   4 -23 158.041 21.5746   2
   0   4 -22-8.50865 14.2518   2
   0   4 -21 48.0929 16.4688   2
   0   4 -20 389.133 28.0600   2
   0   4 -19 1289.82 47.1438   2
   0   4 -18 92.5347 15.3621   2
   0   4 -17-4.78157 10.9713   2
   0  -4  16 81.3226 14.9887   1
   0   4 -16 85.8321 14.0827   2
   0   4 -15 274.060 20.5012   2
   0  -4  15 243.842 20.6355   1
   0   4 -14 9.40381 8.91379   2
   0  -4  14 8.74658 9.09187   1
   0   4 -13 371.434 21.9267   2
   0  -4  13 437.259 24.5578   1
   0   4 -12 16.8524 8.89263   2
   0   4 -12 6.13094 3.21788   1
   0  -4  12 16.1997 9.41374   1
   0   4 -11-1.00116 6.67578   2
   0  -4  11 5.28889 8.29911   1
   0   4 -11-1.11822 3.66128   1
   0   4 -10 600.662 15.6094   1
   0  -4  10 595.071 25.2698   1
   0   4 -10 586.710 23.5693   2
   0   4  -9 26.1558 5.40785   2
   0   4  -9 18.4966 4.68113   1
   0  -4   9 30.2251 8.34294   1
   0   4  -9 35.7997 8.38051   2
   0   4  -8 221.098 10.5862   1
   0  -4   8 227.726 15.7916   1
   0   4  -8 223.993 14.1503   2
   0   4  -7 1913.80 36.1835   2
   0  -4   7 1738.07 37.6388   1
   0   4  -7 1840.41 29.1754   1
   0   4  -6 1.05609 4.14622   1
   0   4  -6-4.51189 5.52036   2
   0  -4   6 10.6242 6.87179   1
   0   4  -5 43.0944 6.01370   1
   0   4  -5 52.6289 7.14180   2
   0  -4   5 55.9143 8.26309   1
   0   4  -4 3121.01 32.7179   2
   0   4  -4 2895.07 38.3349   2
   0   4  -4 2973.79 36.4033   1
   0  -4   4 2906.84 44.7992   1
   0   4  -3 135.786 9.12665   2
   0  -4   3 140.168 10.7807   1
   0   4  -3 146.232 9.08481   1
   0   4  -2 76.8299 7.11692   2
   0  -4   2 60.0752 8.01019   1
   0   4  -2 71.7207 7.09862   1
   0   4  -1 21.8309 5.16824   1
   0  -4   1 28.1905 7.00064   1
   0   4  -1 27.2483 4.76886   2
   0  -4   0 0.22475 6.40928   1
   0   4   0-1.92258 4.30756   1
   0   4   0 5.55135 3.36586   2
   0   4   1 54.6589 6.14524   1
   0   4   1 60.4882 5.27500   2
   0  -4  -1 53.7166 8.47231   1
   0   4   2 7126.10 44.1247   2
   0   4   2 7061.49 52.1298   1
   0  -4  -2 7095.24 67.4617   1
   0   4   3 225.882 8.12686   2
   0   4   3 210.170 9.87756   1
   0  -4  -3 231.045 13.8338   1
   0  -4  -4 6.29080 7.12305   1
   0   4   4 0.74540 2.60767   2
   0   4   4 0.86176 3.99511   1
   0   4   5 195.278 7.57041   2
   0  -4  -5 170.360 12.3628   1
   0  -4  -5 183.163 7.99349   2
   0   4   5 180.960 9.07499   1
   0   4   6-2.26946 3.68520   1
   0   4   6 0.53823 2.61491   2
   0  -4  -6 1.04595 6.33360   1
   0   4   7 92.7968 7.06986   1
   0  -4  -7 111.029 10.4002   1
   0  -4  -8 33.6365 7.64241   1
   0   4   8 29.8301 5.33972   1
   0  -4  -9 27.2823 6.93942   3
   0   4   9 32.1211 5.22047   1
   0  -4  -9 36.5239 7.04251   1
   0  -4  -9 36.3016 4.83465   2
   0  -4 -10 5.79560 6.59552   3
   0  -4 -10 12.3211 5.32965   1
   0   4  10 10.6486 4.53360   1
   0  -4 -10 8.35246 4.01990   2
   0   4  11 1147.77 25.1728   1
   0  -4 -11 1156.31 22.5254   1
   0  -4 -11 1006.55 29.1731   3
   0  -4 -11 1175.06 21.7488   2
   0  -4 -12 9.50087 3.99404   2
   0  -4 -12 27.2932 4.83505   1
   0   4  12 21.5374 5.74168   1
   0  -4 -12 23.7991 8.45672   3
   0  -4 -13-0.31248 3.92123   2
   0  -4 -13 12.3076 8.72764   3
   0   4  13 8.37766 5.66040   1
   0   4  14 3900.68 52.4521   1
   0  -4 -14 3817.05 62.9640   3
   0  -4 -14 3830.32 43.7203   2
   0   4  15 4.49287 5.60767   1
   0  -4 -15 11.2668 9.56429   3
   0  -4 -16 35.9346 10.6013   2
   0  -4 -16 18.3105 10.1855   3
   0   4  16 23.3581 7.65199   1
   0  -4 -17 175.731 17.4631   3
   0   4  17 121.518 12.5251   1
   0  -4 -17 156.155 16.3559   2
   0  -4 -18 238.491 20.7413   3
   0   4  18 244.629 17.7284   1
   0  -4 -18 230.845 19.4396   2
   0  -4 -19 196.771 20.2566   3
   0  -4 -19 217.994 20.0631   2
   0  -4 -20 172.781 19.2341   2
   0  -4 -20 174.434 19.8322   3
   0  -4 -21 16.9357 12.4006   2
   0  -4 -21 20.6108 14.1272   3
   0  -4 -22 8.81448 13.0476   2
   0  -4 -23 1854.17 58.8219   2
   0  -4 -24 47.1793 15.6657   2
   0  -4 -25 20.4598 13.9906   2
   0  -4 -26 6.78741 14.5731   2
   0  -4 -27 185.669 24.2923   2
   0   5 -23 396.481 31.3411   2
   0   5 -22 57.5498 18.1103   2
   0   5 -21 24.4665 14.7474   2
   0   5 -20 397.073 29.0237   2
   0   5 -19 352.745 27.0774   2
   0   5 -18 55.9928 14.6360   2
   0   5 -17 79.5629 14.9115   2
   0   5 -16 26.2427 11.7426   2
   0  -5  16 2.82875 11.7881   1
   0   5 -15 138.084 17.0518   2
   0  -5  15 112.901 16.9299   1
   0   5 -14 1028.38 37.0695   2
   0  -5  14 1077.13 41.5030   1
   0  -5  13 116.408 15.9197   1
   0   5 -13 147.753 16.1490   2
   0  -5  12 251.403 19.9505   1
   0   5 -12 218.547 17.4202   2
   0   5 -12 205.977 9.08102   1
   0  -5  11 366.505 22.8301   1
   0   5 -11 329.490 12.4087   1
   0   5 -11 378.415 20.9400   2
   0   5 -10 147.063 13.5192   2
   0   5 -10 127.241 9.01170   1
   0  -5  10 153.729 15.9613   1
   0   5  -9 49.6731 6.85853   1
   0   5  -9 41.9852 9.24893   2
   0  -5   9 44.0882 9.90787   1
   0  -5   8 831.457 30.1931   1
   0   5  -8 874.487 27.3581   2
   0   5  -8 886.123 22.0152   1
   0   5  -7 33.9361 6.28135   1
   0  -5   7 32.6822 9.12652   1
   0   5  -7 13.0620 6.36676   2
   0   5  -6 10.6628 5.26907   1
   0  -5   6 3.57427 6.89668   1
   0   5  -6 5.18976 5.41767   2
   0   5  -6 8.57686 4.37556   2
   0  -5   5 11.4629 7.59555   1
   0   5  -5 8.59113 4.96664   1
   0   5  -5 8.43915 5.74057   2
   0  -5   4 41.4033 8.84927   1
   0   5  -4 43.0742 6.48848   1
   0   5  -4 34.3938 6.40901   2
   0   5  -3 344.074 14.4986   1
   0  -5   3 338.439 17.8929   1
   0   5  -3 335.041 14.2412   2
   0  -5   2 7054.36 75.8418   1
   0   5  -2 7163.73 61.4193   1
   0   5  -2 7450.48 60.4156   2
   0  -5   1 157.184 12.6642   1
   0   5  -1 186.688 10.0149   2
   0   5  -1 152.607 9.98312   1
   0  -5   0 2.50272 6.88930   1
   0   5   0 8.69955 4.44224   1
   0   5   1 906.523 21.6345   1
   0  -5  -1 976.332 28.3828   1
   0   5   1 951.966 19.3593   2
   0   5   2 22.4521 4.03952   2
   0   5   2 22.7633 5.42679   1
   0  -5  -2 18.6768 8.60107   1
   0   5   3 115.419 8.46344   1
   0   5   3 123.495 7.22828   2
   0  -5  -3 152.874 13.1598   1
   0  -5  -4 20.6537 8.16348   1
   0   5   4 14.0563 5.24153   1
   0   5   4 11.7777 3.57271   2
   0   5   5 14.1573 3.45641   2
   0  -5  -5 19.3196 8.12575   1
   0   5   5 15.7719 5.22139   1
   0  -5  -6 4.99225 7.84549   1
   0   5   6 4.68505 3.21896   2
   0   5   6 7.80791 4.73397   1
   0   5   7 3546.14 42.0842   1
   0  -5  -7 3513.47 36.8265   2
   0  -5  -7 3573.22 55.1049   1
   0   5   7 3480.06 33.4953   2
   0   5   8 112.780 8.94324   1
   0  -5  -8 145.603 12.9155   1
   0   5   9 29.7472 5.50495   1
   0  -5  -9 25.2313 8.54123   1
   0  -5 -10 258.762 14.9191   1
   0  -5 -10 306.623 11.8935   2
   0   5  10 286.544 13.3513   1
   0  -5 -11 5.14330 7.14211   3
   0  -5 -11 7.25422 5.89274   1
   0  -5 -11 2.35781 3.77762   2
   0   5  11-0.53508 4.84753   1
   0  -5 -12 242.108 12.5863   1
   0  -5 -12 242.834 16.5761   3
   0  -5 -12 240.804 11.3434   2
   0   5  12 227.597 13.1090   1
   0  -5 -13 947.852 22.3322   2
   0  -5 -13 888.650 19.6663   1
   0   5  13 964.238 26.4375   1
   0  -5 -13 837.167 29.9491   3
   0  -5 -14 141.222 14.9665   3
   0   5  14 158.759 11.9237   1
   0  -5 -14 139.599 5.94292   1
   0   5  15 209.662 14.0469   1
   0  -5 -15 189.854 17.1662   3
   0  -5 -16 13.6106 10.4083   3
   0   5  16 10.0305 7.05745   1
   0   5  17 32.3891 8.64695   1
   0  -5 -17 32.3754 11.6101   3
   0   5  18 1.32423 7.63172   1
   0  -5 -18 11.1209 11.1187   3
   0  -5 -18-1.46011 10.0907   2
   0  -5 -19 2807.44 63.9594   2
   0  -5 -19 2818.14 66.1151   3
   0  -5 -20 24.5658 12.6317   2
   0  -5 -20 41.9195 14.3362   3
   0  -5 -21 1.25646 12.0697   3
   0  -5 -21 6.29942 12.4888   2
   0  -5 -22 148.585 20.3176   3
   0  -5 -22 193.443 22.2963   2
   0  -5 -23 344.314 28.3218   2
   0  -5 -24 247.941 25.6655   2
   0  -5 -25 96.0071 21.0785   2
   0  -5 -26 10.1930 15.6535   2
   0  -5 -27-6.34405 16.6789   2
   0   6 -22 77.2206 18.5443   2
   0   6 -21 17.0689 14.6312   2
   0   6 -20 17.6647 13.5958   2
   0   6 -19 526.708 32.8030   2
   0   6 -18 670.474 35.7055   2
   0   6 -17 99.3850 16.5437   2
   0   6 -16 90.5490 15.6446   2
   0  -6  16 95.7954 18.8392   1
   0   6 -15 6.39431 10.0981   2
   0  -6  15 8.87475 12.1466   1
   0   6 -14 179.273 18.0182   2
   0  -6  14 206.735 22.0714   1
   0  -6  13-9.71314 12.8161   1
   0   6 -13 5.11287 9.38023   2
   0   6 -12 487.399 25.3092   2
   0  -6  12 502.369 29.9627   1
   0   6 -12 463.541 14.3471   1
   0   6 -11 9.26879 8.60324   2
   0   6 -11 2.03584 4.73709   1
   0  -6  11 12.6618 10.3437   1
   0   6 -10 7.18549 8.37695   2
   0   6 -10-5.59754 5.55274   1
   0   6  -9 171.132 14.4287   2
   0  -6   9 154.225 16.3270   1
   0   6  -9 171.922 11.0997   1
   0   6  -8 31.4179 8.09042   2
   0   6  -8 46.7324 7.72746   1
   0  -6   8 41.7547 10.8988   1
   0   6  -7 389.915 16.3921   1
   0  -6   7 436.256 24.2031   1
   0   6  -7 422.958 19.8392   2
   0   6  -6 1979.89 39.7164   2
   0   6  -6 2116.40 37.0374   1
   0  -6   6 2017.72 48.6347   1
   0   6  -5 10.2125 6.02390   2
   0  -6   5-3.98360 8.38210   1
   0   6  -5 2.15271 5.68036   1
   0   6  -4 127.115 10.8026   2
   0  -6   4 131.579 14.0786   1
   0   6  -4 138.885 10.7330   1
   0   6  -3 2390.40 38.9036   2
   0   6  -3 2530.79 40.4764   1
   0  -6   3 2425.82 50.1343   1
   0   6  -2 191.946 12.1417   1
   0  -6   2 204.687 16.4299   1
   0   6  -2 170.417 10.8991   2
   0   6  -1 0.16270 4.46657   2
   0  -6   1-5.14096 7.80464   1
   0   6  -1 0.51045 5.57764   1
   0   6   0 41.3545 7.19415   1
   0  -6   0 40.0893 9.96903   1
   0   6   0 39.5704 5.86771   2
   0   6   1 23.9134 5.85052   1
   0   6   1 16.6828 4.45907   2
   0  -6  -1 24.5428 9.02026   1
   0   6   2 180.126 9.57647   2
   0  -6  -2 234.239 16.8094   1
   0   6   2 183.979 11.6309   1
   0  -6  -3 4842.85 69.3098   1
   0   6   3 4975.12 54.5173   1
   0   6   3 5001.51 45.5402   2
   0   6   4 272.273 10.8882   2
   0  -6  -4 258.274 18.1770   1
   0   6   4 237.610 12.9360   1
   0   6   5 53.9558 7.50468   1
   0  -6  -5 47.5292 10.8413   1
   0   6   5 51.8629 5.65010   2
   0  -6  -6 51.0342 11.3380   1
   0   6   6 37.3821 6.48048   1
   0   6   6 34.1114 5.09347   2
   0   6   7 8.12459 3.55510   2
   0   6   7 11.0573 4.67339   1
   0  -6  -7 7.59976 8.71226   1
   0  -6  -8 117.423 8.44020   2
   0  -6  -8 138.119 14.2069   1
   0   6   8 108.416 9.35370   1
   0   6   8 135.057 7.81310   2
   0  -6  -9 160.590 14.7888   1
   0   6   9 138.355 10.4051   1
   0  -6 -10-4.55967 7.64902   1
   0   6  10 0.09584 5.25573   1
   0  -6 -11 35.5370 9.02423   1
   0   6  11 26.3850 6.22697   1
   0  -6 -12 407.170 18.8902   1
   0   6  12 429.028 18.1826   1
   0  -6 -12 347.535 20.2503   3
   0  -6 -13 254.416 18.3393   3
   0  -6 -13 253.425 14.2152   1
   0   6  13 227.755 14.3048   1
   0  -6 -14 53.6812 11.9329   3
   0   6  14 88.0350 10.1109   1
   0  -6 -14 62.2022 7.50096   1
   0   6  15 2480.94 46.4548   1
   0  -6 -15 2386.76 54.9061   3
   0  -6 -16 15.4702 11.1537   3
   0   6  16-4.07317 7.30491   1
   0   6  17 9.47947 7.90128   1
   0  -6 -17 12.6554 10.6785   3
   0  -6 -18 710.618 34.2616   3
   0   6  18 710.041 28.6570   1
   0  -6 -19 241.528 23.1772   3
   0   6  19 209.471 17.5696   1
   0  -6 -20 317.399 24.2891   2
   0  -6 -20 253.269 23.6455   3
   0  -6 -21 72.6280 16.7749   3
   0  -6 -21 55.7942 14.7200   2
   0  -6 -22 54.1281 16.5135   3
   0  -6 -22 12.8027 12.8447   2
   0  -6 -23 0.98585 13.7811   2
   0  -6 -24 1711.76 60.2111   2
   0  -6 -25 32.3492 15.4654   2
   0  -6 -26 22.8349 15.1917   2
   0  -6 -27 17.2310 15.6964   2
   0   7 -21 52.2411 16.8233   2
   0   7 -20 7.68742 13.7975   2
   0   7 -19 376.737 28.8970   2
   0   7 -18 459.586 30.6298   2
   0   7 -17 8.72827 11.6096   2
   0  -7  16 191.018 24.0985   1
   0   7 -16 218.630 21.5295   2
   0   7 -15 16.3135 11.2569   2
   0  -7  15 16.9640 15.0357   1
   0   7 -14 38.4227 12.3815   2
   0  -7  14 39.6742 14.7020   1
   0  -7  13 308.627 26.3292   1
   0   7 -13 315.716 22.4528   2
   0   7 -12 183.312 17.3063   2
   0  -7  12 252.879 23.9282   1
   0  -7  11 349.132 26.9635   1
   0   7 -11 339.566 14.8990   1
   0   7 -11 342.818 22.0162   2
   0  -7  10 221.633 21.7632   1
   0   7 -10 204.185 12.8990   1
   0   7 -10 169.684 15.6902   2
   0   7  -9 85.6043 9.30298   1
   0   7  -9 86.0672 11.6128   2
   0  -7   9 60.0945 14.1530   1
   0  -7   8 58.9392 13.4867   1
   0   7  -8 71.8088 11.2964   2
   0   7  -8 67.2287 8.98885   1
   0   7  -7 1706.68 40.7048   2
   0   7  -7 1733.55 35.8362   1
   0  -7   7 1724.69 50.2563   1
   0   7  -6 128.500 11.1341   1
   0  -7   6 118.458 15.9589   1
   0   7  -6 123.080 12.0760   2
   0  -7   5 16.0146 10.3667   1
   0   7  -5 11.8374 6.60341   2
   0   7  -5 19.9731 6.96548   1
   0   7  -4 25.3172 7.26112   2
   0   7  -4 26.9172 7.40200   1
   0  -7   4 17.8085 10.3867   1
   0   7  -3 40.3286 8.07850   1
   0   7  -3 33.1645 6.82042   2
   0  -7   3 27.9668 10.5623   1
   0   7  -2 277.208 14.2834   2
   0   7  -2 287.763 15.5836   1
   0  -7   2 283.497 20.1536   1
   0   7  -1 3961.74 53.7021   1
   0  -7   1 3710.31 67.0899   1
   0   7  -1 3941.43 50.1446   2
   0   7   0 246.849 12.9512   2
   0   7   0 238.706 14.5975   1
   0  -7   0 238.540 18.6650   1
   0   7   1 0.10723 5.38092   1
   0   7   1-2.96330 4.85450   2
   0  -7  -1 6.49276 8.88366   1
   0  -7  -2 640.664 28.6941   1
   0   7   2 644.319 22.1549   1
   0   7   2 661.834 18.9504   2
   0  -7  -3 83.9429 12.7555   1
   0   7   3 86.6559 9.42515   1
   0   7   3 92.7376 7.72518   2
   0   7   4 79.3278 7.17772   2
   0   7   4 69.5420 8.50885   1
   0  -7  -5 39.2096 10.8082   1
   0   7   5 38.4016 7.32188   1
   0   7   5 19.8230 4.53994   2
   0   7   6 7.22898 6.11460   1
   0   7   6-0.75745 3.90363   2
   0  -7  -6 0.79954 9.38189   1
   0   7   7 1.71111 3.77088   2
   0   7   7-0.62936 5.66021   1
   0  -7  -7 7.90184 9.17400   1
   0   7   8 1846.84 29.2696   2
   0   7   8 1879.26 36.9646   1
   0  -7  -8 1873.42 47.8490   1
   0   7   9 360.534 12.9955   2
   0  -7  -9 357.755 22.4337   1
   0   7   9 340.483 16.6002   1
   0   7  10 54.8956 8.23648   1
   0  -7 -10 84.6217 13.2352   1
   0  -7 -11 921.319 32.4875   1
   0   7  11 790.890 25.0768   1
   0  -7 -12 14.3857 8.61985   1
   0   7  12 9.03939 6.83427   1
   0   7  13 219.056 14.8283   1
   0  -7 -13 244.145 16.3019   1
   0  -7 -13 239.551 18.9362   3
   0  -7 -14 400.436 18.4994   1
   0  -7 -14 384.667 23.7495   3
   0   7  14 393.835 19.8489   1
   0   7  15 106.542 11.5052   1
   0  -7 -15 107.707 15.5403   3
   0  -7 -15 101.819 9.18400   1
   0  -7 -16 141.121 17.0559   3
   0   7  16 142.276 13.6885   1
   0  -7 -17 5.29328 11.0049   3
   0   7  17 10.5775 8.58102   1
   0  -7 -18 124.423 17.3768   3
   0   7  18 124.163 14.7057   1
   0  -7 -19-8.32630 12.6979   3
   0   7  19 6.78805 9.03440   1
   0  -7 -20 2804.95 71.1763   3
   0  -7 -21-2.17273 11.8989   2
   0  -7 -21-3.99806 13.5463   3
   0  -7 -22-3.87074 13.4163   2
   0  -7 -22 21.0524 14.8669   3
   0  -7 -23 186.749 23.3589   3
   0  -7 -23 241.101 25.4597   2
   0  -7 -24 185.205 24.6621   2
   0  -7 -25 361.381 30.9135   2
   0  -7 -26 36.5008 18.4073   2
   0  -7 -27-5.48851 18.2574   2
   0   8 -20 64.8905 18.7583   2
   0   8 -19-4.69087 15.6358   2
   0   8 -18 236.026 24.8303   2
   0   8 -17 264.991 25.0388   2
   0   8 -16 110.515 17.1206   2
   0  -8  16 91.7223 22.2924   1
   0   8 -15 78.7814 15.7622   2
   0  -8  15 133.544 24.5009   1
   0  -8  14 15.8156 16.3562   1
   0   8 -14 27.8759 12.5564   2
   0  -8  13 230.679 26.2646   1
   0   8 -13 280.285 22.6983   2
   0  -8  12 66.0767 18.6746   1
   0   8 -12 71.0734 13.3918   2
   0   8 -11 1056.74 38.4695   2
   0   8 -11 1039.50 26.6280   1
   0  -8  11 1090.45 48.0516   1
   0  -8  10 74.6538 16.7043   1
   0   8 -10 58.3632 8.84236   1
   0   8 -10 54.0217 11.1784   2
   0  -8   9 0.26760 12.0155   1
   0   8  -9 7.20179 7.04141   1
   0   8  -9 10.1425 9.00308   2
   0   8  -8 29.6425 7.96905   1
   0   8  -8 33.0282 10.2081   2
   0  -8   8 14.1797 11.8372   1
   0  -8   7 71.9709 14.9666   1
   0   8  -7 77.1174 10.1070   1
   0   8  -7 60.9095 10.7079   2
   0   8  -6 700.703 26.9880   2
   0  -8   6 773.773 36.7216   1
   0   8  -6 688.985 24.9091   1
   0   8  -5 2150.81 43.1080   1
   0  -8   5 2152.48 58.4910   1
   0   8  -5 2127.33 44.5088   2
   0  -8   4 41.1909 13.2281   1
   0   8  -4 61.7873 9.26978   2
   0   8  -4 62.3962 9.96073   1
   0   8  -3 43.0727 9.15160   1
   0  -8   3 53.2972 13.6970   1
   0   8  -3 57.0170 9.10759   2
   0   8  -2 2447.42 43.4502   2
   0  -8   2 2398.57 59.2479   1
   0   8  -2 2562.28 46.8133   1
   0  -8   1 306.259 22.7837   1
   0   8  -1 380.632 18.9590   1
   0   8  -1 332.626 16.2747   2
   0   8   0 2.67765 5.21356   2
   0   8   0 2.56493 6.96530   1
   0  -8   0 11.3722 10.2189   1
   0   8   1 0.24933 6.29597   1
   0  -8  -1-14.8177 11.6468   1
   0   8   1-4.19833 5.06432   2
   0   8   2-3.02553 6.71591   1
   0   8   2 8.76139 5.14963   2
   0   8   3 48.0763 6.76133   2
   0  -8  -3 75.8814 14.0447   1
   0   8   3 46.9369 8.31966   1
   0   8   4 2653.31 46.7073   1
   0   8   4 2735.80 39.1941   2
   0  -8  -4 2825.94 63.4347   1
   0   8   5 219.050 11.5819   2
   0  -8  -5 225.511 20.3197   1
   0   8   5 180.928 13.7649   1
   0  -8  -6 11.4757 10.5495   1
   0   8   6 28.5470 5.87475   2
   0   8   6 37.3354 7.88254   1
   0   8   7 22.3562 5.40986   2
   0   8   7 19.4550 7.41734   1
   0  -8  -7 3.42397 9.81013   1
   0  -8  -8 11.8641 11.1559   1
   0   8   8-2.71195 7.02155   1
   0  -8  -9 242.454 20.4810   1
   0   8   9 288.042 16.5356   1
   0   8  10 434.442 19.9931   1
   0  -8 -10 449.414 26.4729   1
   0   8  11 1.55332 6.82023   1
   0  -8 -11 4.84690 9.76335   1
   0   8  12 47.6863 8.96238   1
   0  -8 -12 45.9221 11.7215   1
   0   8  13 352.972 19.4172   1
   0  -8 -13 355.741 21.8641   1
   0   8  14 168.942 14.9455   1
   0  -8 -14 163.086 15.2404   1
   0  -8 -14 125.815 15.8605   3
   0  -8 -15 70.0887 11.1593   1
   0  -8 -15 63.6279 13.7685   3
   0   8  15 45.2195 9.87627   1
   0   8  16 1811.59 44.8474   1
   0  -8 -16 2026.47 55.8873   3
   0   8  17 6.25798 8.49031   1
   0  -8 -17 3.50331 11.3074   3
   0   8  18 34.3510 10.2525   1
   0  -8 -18 36.1053 14.8540   3
   0   8  19 850.435 33.9828   1
   0  -8 -19 876.411 41.1908   3
   0  -8 -20 78.6535 17.6328   3
   0  -8 -21 312.270 27.9813   3
   0  -8 -22 93.6644 18.8279   3
   0  -8 -22 83.5332 17.6683   2
   0  -8 -23 47.4947 17.3267   3
   0  -8 -23 69.7547 17.7572   2
   0  -8 -24 14.0075 15.2316   2
   0  -8 -25 1086.63 51.3363   2
   0  -8 -26-17.6882 17.5176   2
   0  -8 -27 2.99500 17.8487   2
   0   9 -19-4.50515 15.5311   2
   0   9 -18 267.557 26.2108   2
   0   9 -17 385.777 30.0468   2
   0  -9  16 8.78049 19.0818   1
   0   9 -16 1.49392 12.5308   2
   0  -9  15 306.563 32.4213   1
   0   9 -15 250.973 23.8243   2
   0  -9  14-10.1146 16.9429   1
   0   9 -14 0.62116 11.8518   2
   0  -9  13 48.0459 17.6707   1
   0   9 -13 19.0959 11.9479   2
   0   9 -12 270.153 22.7205   2
   0  -9  12 301.966 30.9148   1
   0  -9  11 149.529 23.1656   1
   0   9 -11 153.941 17.4987   2
   0   9 -10 320.907 22.2813   2
   0  -9  10 274.501 27.7689   1
   0   9 -10 315.052 17.0857   1
   0   9  -9 371.118 19.0861   1
   0   9  -9 338.658 22.2017   2
   0  -9   9 380.486 30.9604   1
   0   9  -8 4.20178 7.08639   1
   0   9  -8 21.4716 9.37165   2
   0  -9   8 28.3039 15.5200   1
   0   9  -7 133.603 12.8562   1
   0  -9   7 148.526 21.0033   1
   0   9  -7 131.408 14.1523   2
   0   9  -6 2130.38 48.3550   2
   0   9  -6 2119.22 44.6529   1
   0  -9   6 2137.67 64.1162   1
   0  -9   5 251.147 24.1542   1
   0   9  -5 280.250 18.4367   2
   0   9  -5 308.559 18.1566   1
   0   9  -4 10.1061 7.84143   1
   0  -9   4 10.2715 12.6002   1
   0   9  -4 2.24121 6.85150   2
   0  -9   3 8.58431 12.0562   1
   0   9  -3 6.31713 7.29254   2
   0   9  -3 1.79364 7.03471   1
   0   9  -2-4.22563 7.83329   1
   0   9  -2-5.41438 6.38272   2
   0  -9   2-0.50460 11.7210   1
   0   9  -1 161.183 12.8379   2
   0   9  -1 155.897 13.8753   1
   0   9   0 2106.30 45.1250   1
   0  -9   0 2086.75 59.5284   1
   0   9   0 2108.51 41.0463   2
   0   9   1 321.145 16.3602   2
   0  -9  -1 252.123 23.0148   1
   0   9   1 316.990 18.8257   1
   0   9   2 5.14287 7.87187   1
   0  -9  -2 13.6566 12.6205   1
   0   9   2-0.52957 5.46528   2
   0  -9  -3 916.287 40.0298   1
   0   9   3 890.064 29.6961   1
   0   9   3 940.696 25.6938   2
   0   9   4 239.354 13.3923   2
   0   9   4 242.794 16.5587   1
   0  -9  -4 231.497 22.1448   1
   0  -9  -5 144.184 19.4665   1
   0   9   5 120.222 9.83080   2
   0   9   5 145.319 13.4236   1
   0   9   6 68.1638 9.97132   1
   0  -9  -6 68.3881 15.4072   1
   0  -9  -7 4.30182 12.7245   1
   0   9   7 0.56035 6.89466   1
   0   9   8 3.96285 7.06410   1
   0  -9  -8 8.27729 12.2176   1
   0   9   9 581.203 24.4114   1
   0  -9  -9 593.629 32.3186   1
   0  -9 -10 264.772 22.7695   1
   0   9  10 295.520 18.2407   1
   0  -9 -11 37.1628 13.1909   1
   0   9  11 48.3410 9.53296   1
   0  -9 -12 715.903 33.8028   1
   0   9  12 730.150 28.0208   1
   0  -9 -13 10.3238 10.7236   1
   0   9  13 0.78125 8.16220   1
   0  -9 -14 40.9235 12.0414   1
   0   9  14 58.9203 11.4296   1
   0  -9 -15 819.469 37.3099   3
   0   9  15 805.947 31.1474   1
   0  -9 -15 781.648 30.2339   1
   0  -9 -16 34.6535 13.0431   3
   0   9  16 21.5592 9.42381   1
   0   9  17 142.179 15.7681   1
   0  -9 -17 140.691 18.7762   3
   0   9  18 12.9878 9.50577   1
   0  -9 -18 58.4712 16.5588   3
   0   9  19 115.693 15.1132   1
   0  -9 -19 118.511 19.3890   3
   0   9  20 17.7488 12.1540   1
   0  -9 -20-5.45734 13.9222   3
   0  -9 -21 1567.24 58.4729   3
   0  -9 -22 25.1853 17.2741   3
   0  -9 -23 14.9946 16.7174   3
   0  -9 -24 138.512 23.9274   3
   0  -9 -24 179.255 24.4332   2
   0  -9 -25 70.2954 20.0027   2
   0  -9 -26 291.842 30.4167   2
   0  -9 -27-12.8335 20.0379   2
   0  10 -18 1.81598 13.8446   2
   0  10 -17 123.536 19.7490   2
   0  10 -16 98.6736 17.5250   2
   0 -10  15 173.025 30.0505   1
   0  10 -15 122.003 19.1306   2
   0  10 -14 113.205 18.4659   2
   0 -10  14 123.326 25.5638   1
   0 -10  13 4.56609 18.3170   1
   0  10 -13 32.8005 12.7395   2
   0 -10  12 220.575 30.1189   1
   0  10 -12 268.408 23.1823   2
   0 -10  11 79.2599 21.7991   1
   0  10 -11 73.0335 14.6277   2
   0  10 -10 828.828 27.6639   1
   0 -10  10 882.407 48.2511   1
   0  10  -9 136.147 16.9326   2
   0  10  -9 108.408 12.5514   1
   0 -10   9 135.139 24.0236   1
   0 -10   8 17.4172 16.0389   1
   0  10  -8 6.00770 9.52320   2
   0  10  -8 16.3526 8.71334   1
   0  10  -7 7.70447 8.67168   2
   0 -10   7-0.82416 15.0222   1
   0  10  -7 18.6014 9.49915   1
   0  10  -6 35.6082 9.77129   1
   0  10  -6 32.9038 9.86008   2
   0 -10   6 51.6028 17.9182   1
   0  10  -5 438.264 22.7765   1
   0 -10   5 447.763 33.0958   1
   0  10  -5 482.941 24.5847   2
   0  10  -4 1349.88 38.9941   2
   0  10  -4 1256.53 37.0001   1
   0 -10   4 1258.01 52.4759   1
   0  10  -3 44.3203 9.74071   2
   0 -10   3 36.1434 15.3324   1
   0  10  -3 56.0566 11.2746   1
   0 -10   2 76.8702 18.9538   1
   0  10  -2 65.1069 11.2239   1
   0  10  -2 68.3995 10.7425   2
   0  10  -1 1900.02 42.5916   2
   0  10  -1 1896.34 45.2082   1
   0 -10   1 1969.49 62.7862   1
   0  10   0 460.820 23.3539   1
   0  10   0 422.481 20.4180   2
   0 -10   0 441.931 31.9422   1
   0  10   1 51.3245 9.20314   2
   0  10   1 40.1271 10.0937   1
   0 -10  -1 64.4206 17.2990   1
   0  10   2-6.88654 7.98900   1
   0  10   2 2.10025 5.67644   2
   0 -10  -2 0.41839 13.1747   1
   0  10   3 8.54210 8.52700   1
   0 -10  -3 3.44776 12.8614   1
   0  10   3 0.52132 5.59805   2
   0  10   4 18.1934 8.49991   1
   0 -10  -4 28.7196 15.3928   1
   0  10   5 1887.60 45.2493   1
   0 -10  -5 2074.84 62.9388   1
   0 -10  -6 443.716 31.5715   1
   0  10   6 451.490 23.1506   1
   0  10   7 73.8597 11.9104   1
   0 -10  -7 42.2617 14.7203   1
   0 -10  -8-13.8397 13.3836   1
   0  10   8 11.2181 8.16130   1
   0  10   9 45.1067 10.4032   1
   0 -10  -9 92.2523 18.1343   1
   0 -10 -10 507.475 32.0179   1
   0  10  10 427.470 22.5962   1
   0  10  11 929.084 32.8314   1
   0 -10 -11 814.707 38.9119   1
   0  10  12-2.94995 7.92614   1
   0 -10 -12-3.32860 11.7776   1
   0 -10 -13 17.8493 12.8916   1
   0  10  13 6.00039 8.38086   1
   0 -10 -14 37.3987 13.5364   1
   0  10  14 19.5290 9.26859   1
   0 -10 -15 143.161 17.2294   1
   0  10  15 107.968 13.8748   1
   0 -10 -15 97.5039 16.6690   3
   0 -10 -16 27.1816 10.2628   1
   0 -10 -16 25.5917 14.1074   3
   0  10  16 41.3847 11.5795   1
   0 -10 -17 1112.58 46.7791   3
   0  10  17 1270.35 42.5605   1
   0 -10 -18-2.70872 13.6333   3
   0  10  18-1.88077 10.5320   1
   0  10  19 31.2747 12.5917   1
   0 -10 -19 26.1842 14.1235   3
   0  10  20 560.098 31.0502   1
   0 -10 -20 560.989 36.7989   3
   0 -10 -21 38.8147 18.8550   3
   0 -10 -22 240.670 28.6522   3
   0 -10 -23 57.5143 21.3514   3
   0 -10 -24 42.6273 19.7096   3
   0 -10 -25-27.5361 18.7022   2
   0 -10 -26 773.640 47.5713   2
   0  11 -16 349.050 29.0845   2
   0 -11  15 6.02274 20.5343   1
   0  11 -15 40.9847 16.6230   2
   0 -11  14 324.108 37.6926   1
   0  11 -14 304.104 27.5441   2
   0  11 -13 1.86416 11.9210   2
   0 -11  13 36.7418 21.0572   1
   0 -11  12 19.9251 18.2405   1
   0  11 -12 23.8366 13.7297   2
   0 -11  11 21.0932 18.8987   1
   0  11 -11 53.0475 14.1776   2
   0  11 -10 74.3758 15.0301   2
   0 -11  10 84.3047 23.7165   1
   0 -11   9 192.355 29.2329   1
   0  11  -9 184.047 19.3182   2
   0  11  -9 187.116 15.7070   1
   0  11  -8 130.237 14.0622   1
   0 -11   8 177.949 27.5536   1
   0  11  -8 173.208 18.2428   2
   0  11  -7 70.4004 11.6026   1
   0 -11   7 55.2966 18.2656   1
   0  11  -7 59.1403 12.5387   2
   0  11  -6 196.475 17.1490   1
   0 -11   6 185.196 26.3324   1
   0  11  -6 182.146 17.8276   2
   0 -11   5 1653.58 64.9439   1
   0  11  -5 1699.40 45.0386   1
   0  11  -5 1709.83 46.4574   2
   0  11  -4 542.159 26.4639   2
   0  11  -4 518.236 25.9874   1
   0 -11   4 481.243 36.1205   1
   0 -11   3 8.67868 14.9718   1
   0  11  -3-0.68113 8.48515   2
   0  11  -3-7.11382 8.88837   1
   0 -11   2 3.52296 15.7415   1
   0  11  -2 24.9994 10.2837   2
   0  11  -2 14.8378 8.57682   1
   0 -11   1 21.8389 14.2206   1
   0  11  -1 36.1656 9.55482   2
   0  11  -1 46.6774 11.2769   1
   0 -11   0 164.695 22.9297   1
   0  11   0 232.651 16.6047   2
   0  11   0 219.718 18.0232   1
   0 -11  -1 1994.44 67.6287   1
   0  11   1 2076.06 50.0734   1
   0  11   2 489.842 25.5514   1
   0 -11  -2 515.036 35.5518   1
   0  11   3 11.5811 9.80475   1
   0 -11  -3 15.6005 14.6615   1
   0 -11  -4 873.857 45.0653   1
   0  11   4 773.164 31.2474   1
   0  11   5 498.000 25.5924   1
   0 -11  -5 528.935 35.8587   1
   0 -11  -6 211.281 25.2043   1
   0  11   6 232.874 18.6536   1
   0 -11  -7 489.581 34.4552   1
   0  11   7 522.902 26.3204   1
   0  11   8 27.6739 10.1775   1
   0 -11  -8 12.4887 15.0683   1
   0  11   9 14.4410 10.1901   1
   0 -11  -9 34.2389 16.0965   1
   0  11  10 338.750 22.1695   1
   0 -11 -10 435.253 31.7734   1
   0 -11 -11 436.918 32.4990   1
   0  11  11 487.697 25.8764   1
   0  11  12 6.94359 9.19181   1
   0 -11 -12 0.42057 13.1078   1
   0  11  13 639.036 30.1748   1
   0 -11 -13 665.005 36.8888   1
   0 -11 -14 2.59322 12.7627   1
   0  11  14-4.73790 8.66652   1
   0  11  15 126.268 15.9814   1
   0 -11 -15 108.463 16.7396   1
   0  11  16 705.781 32.8545   1
   0 -11 -16 704.599 38.6623   3
   0 -11 -16 682.416 32.6262   1
   0  11  17-1.87186 10.1668   1
   0 -11 -17 14.1231 14.3785   3
   0  11  18 197.118 20.1731   1
   0 -11 -18 216.304 25.2476   3
   0  11  19 22.9376 12.8261   1
   0 -11 -19 8.11043 15.5881   3
   0 -11 -20 66.3587 18.6479   3
   0  11  20 42.7978 13.0674   1
   0  11  21 13.8758 12.1099   1
   0 -11 -21 3.61005 16.8735   3
   0 -11 -22 1167.99 55.4642   3
   0 -11 -23 10.4512 18.3257   3
   0 -11 -24 2.50441 18.8661   3
   0 -11 -25 108.263 23.6372   2
   0 -11 -26 22.5919 18.2892   2
   0 -12  15 66.4542 26.3129   1
   0 -12  14 110.581 29.2716   1
   0 -12  13 107.921 30.1819   1
   0 -12  12 25.9557 23.2823   1
   0 -12  11 187.926 30.9118   1
   0 -12  10 115.513 25.9243   1
   0 -12   9 692.938 49.6983   1
   0  12  -9 530.750 31.0639   2
   0 -12   8 98.2201 25.3382   1
   0  12  -8 151.992 15.7489   1
   0  12  -7 14.1068 9.68626   1
   0 -12   7-4.10519 19.3570   1
   0 -12   6 8.81617 18.4308   1
   0  12  -6-6.77778 9.44733   1
   0  12  -5 32.5055 11.0048   1
   0 -12   5 13.8617 18.4404   1
   0  12  -4 271.569 20.7632   1
   0 -12   4 221.480 29.2517   1
   0  12  -3 753.279 32.5469   1
   0 -12   3 719.616 46.1833   1
   0 -12   2 112.722 24.6165   1
   0  12  -2 84.9058 13.7886   1
   0 -12   1 59.8075 19.3499   1
   0  12  -1 66.0528 13.4621   1
   0 -12   0 923.002 50.3245   1
   0  12   0 1157.31 39.8158   1
   0 -12  -1 582.967 40.9831   1
   0  12   1 547.923 28.2464   1
   0  12   2 97.6035 14.9833   1
   0 -12  -2 116.000 22.5395   1
   0  12   3 79.0000 14.0282   1
   0 -12  -3 65.6894 20.3931   1
   0  12   4-2.87297 10.0896   1
   0 -12  -4 6.45393 16.6659   1
   0  12   5 22.0227 10.4689   1
   0 -12  -5 5.64227 15.2271   1
   0 -12  -6 735.212 43.8444   1
   0  12   6 707.602 31.8808   1
   0  12   7 340.510 23.2484   1
   0 -12  -7 369.396 32.0936   1
   0 -12  -8 3.76370 16.1378   1
   0  12   8 21.8049 11.0113   1
   0 -12  -9-16.1933 17.2814   1
   0  12   9 4.98521 9.23567   1
   0 -12 -10 173.636 25.7226   1
   0  12  10 143.270 16.4711   1
   0 -12 -11 490.540 35.3764   1
   0  12  11 401.618 25.2566   1
   0  12  12 724.990 32.9289   1
   0 -12 -12 741.790 41.9030   1
   0 -12 -13 17.4802 14.7604   1
   0  12  13 1.92945 9.69252   1
   0  12  14 8.40109 11.1359   1
   0 -12 -14 2.64934 13.7317   1
   0  12  15 14.7867 11.4939   1
   0 -12 -15 13.9864 15.0641   1
   0  12  16 229.874 21.8987   1
   0 -12 -16 215.626 22.4063   1
   0 -12 -16 242.452 26.6624   3
   0 -12 -17 15.1489 14.4598   3
   0  12  17 11.7616 11.8679   1
   0 -12 -18 1065.84 51.3697   3
   0  12  18 1150.32 45.2614   1
   0  12  19 25.5824 12.1672   1
   0 -12 -19 26.9278 17.8924   3
   0 -12 -20 11.1703 16.4219   3
   0  12  20 27.3560 13.1277   1
   0  12  21 589.463 35.1549   1
   0 -12 -21 482.067 38.0041   3
   0 -12 -22-1.14262 16.8309   3
   0 -12 -23 213.173 29.3142   3
   0 -12 -24-4.87901 19.7463   3
   0 -13  13 392.807 44.9190   1
   0 -13  12-24.8686 25.1407   1
   0 -13  11-1.09039 24.6423   1
   0 -13  10-39.3489 27.0756   1
   0 -13   9 24.4327 22.6675   1
   0 -13   8 187.168 32.7960   1
   0  13  -7 82.3343 14.0832   1
   0 -13   7 64.9196 24.4314   1
   0  13  -6 7.05973 10.2021   1
   0 -13   6 21.5759 21.7019   1
   0 -13   5 62.1273 22.7077   1
   0  13  -5 68.2369 14.2957   1
   0 -13   4 1027.79 59.3037   1
   0  13  -4 1008.64 38.8080   1
   0  13  -3 590.123 30.6169   1
   0 -13   3 655.638 47.8326   1
   0  13  -2 35.3653 13.1473   1
   0 -13   2-6.72947 19.1448   1
   0  13  -1-2.26390 10.5436   1
   0 -13   1 17.6449 20.6944   1
   0 -13   0-6.50039 17.3777   1
   0  13   0 9.41594 11.3178   1
   0 -13  -1 19.0889 17.5007   1
   0  13   1 80.1396 14.8321   1
   0  13   2 641.943 32.0987   1
   0 -13  -2 708.717 46.9247   1
   0  13   3 180.485 19.2889   1
   0 -13  -3 205.900 29.0354   1
   0  13   4 11.6340 11.3609   1
   0 -13  -4-0.40140 16.7890   1
   0 -13  -5 244.756 29.5978   1
   0  13   5 210.762 19.9774   1
   0 -13  -6 527.848 41.0170   1
   0  13   6 446.331 27.1094   1
   0  13   7 298.132 23.0589   1
   0 -13  -7 326.237 33.2767   1
   0 -13  -8 340.627 33.0052   1
   0  13   8 346.407 24.7661   1
   0 -13  -9-7.71420 17.6872   1
   0  13   9 28.4896 12.0795   1
   0 -13 -10 0.55625 16.4060   1
   0  13  10 1.34606 11.1098   1
   0 -13 -11 128.445 23.8180   1
   0  13  11 120.351 16.9180   1
   0  13  12 388.426 26.0952   1
   0 -13 -12 365.938 32.6545   1
   0 -13 -13 22.0963 17.7110   1
   0  13  13 49.1916 13.1978   1
   0  13  14 557.184 31.5372   1
   0 -13 -14 565.311 38.2639   1
   0 -13 -15 16.7329 15.5903   1
   0  13  15 4.21952 11.1984   1
   0  13  16 153.915 19.4088   1
   0 -13 -17 1124.43 53.5805   3
   0  13  17 1189.49 46.9187   1
   0 -13 -18 5.22793 18.3397   3
   0  13  18 1.35227 12.5594   1
   0  13  19 122.916 20.0059   1
   0 -13 -19 108.376 22.8784   3
   0  13  20 16.6656 13.4553   1
   0 -13 -20 14.6647 17.2732   3
   0  13  21 106.111 19.6041   1
   0 -13 -21 45.4642 22.4735   3
   0 -13 -22 9.64518 18.7290   3
   0 -13 -23 499.715 42.0729   3
   0 -13 -24 77.3702 24.9551   3
   0 -13 -25 4.39775 21.2485   3
   0 -14  10 127.864 31.7394   1
   0 -14   9 176.644 33.5576   1
   0 -14   8 594.574 52.5347   1
   0 -14   7 180.963 34.0243   1
   0 -14   6-16.8173 24.8310   1
   0  14  -6-5.79908 11.1556   1
   0 -14   5 18.7126 23.4806   1
   0  14  -5 11.8563 11.7555   1
   0  14  -4 3.92164 11.0393   1
   0 -14   4-30.0833 23.3867   1
   0 -14   3 75.2764 24.5624   1
   0  14  -3 125.451 17.6855   1
   0  14  -2 171.505 19.3465   1
   0 -14   2 177.578 31.4367   1
   0 -14   1 85.4935 25.4616   1
   0  14  -1 48.9483 13.6942   1
   0 -14   0 32.5432 20.7628   1
   0  14   0 30.3485 12.8042   1
   0 -14  -1 865.186 55.5705   1
   0  14   1 878.761 38.5684   1
   0 -14  -2 852.473 54.5743   1
   0  14   2 734.115 35.8751   1
   0  14   3 46.1675 14.3401   1
   0 -14  -3 101.779 27.1508   1
   0  14   4 72.6808 14.7091   1
   0 -14  -4 77.7096 26.1049   1
   0 -14  -5 64.3825 25.6510   1
   0  14   5 6.45556 11.5875   1
   0  14   6 10.4347 12.3267   1
   0 -14  -6-1.31214 18.3404   1
   0 -14  -7 299.206 34.2826   1
   0  14   7 198.836 20.9736   1
   0 -14  -8 479.771 41.3317   1
   0  14   8 376.789 27.6113   1
   0  14   9 12.8926 11.3309   1
   0 -14  -9 38.3923 21.8748   1
   0  14  10 26.4113 12.4339   1
   0 -14 -10 37.5845 19.4012   1
   0 -14 -11 74.0962 22.1962   1
   0  14  11 129.578 18.7066   1
   0 -14 -12 313.222 33.4605   1
   0  14  12 287.550 25.3276   1
   0  14  13 799.740 38.7438   1
   0 -14 -13 881.920 50.6002   1
   0 -14 -14 55.9054 21.9314   1
   0  14  14 34.6769 13.6360   1
   0 -14 -15 41.4477 18.7757   1
   0  14  15 26.0528 14.2494   1
   0  14  16 52.6717 15.8006   1
   0 -14 -17 127.523 24.1077   3
   0  14  17 178.371 22.4429   1
   0  14  18-7.43444 13.8664   1
   0 -14 -18 16.6751 17.8659   3
   0 -14 -19 791.408 49.7087   3
   0  14  19 832.794 42.8950   1
   0  14  20 34.6661 16.0097   1
   0 -14 -20 40.6397 21.9929   3
   0 -14 -21-10.8813 20.8584   3
   0  14  21 32.2191 16.6881   1
   0 -14 -22 362.292 37.9779   3
   0  14  22 301.961 28.4853   1
   0 -14 -23 50.9419 22.4879   3
   0 -14 -24 287.306 35.8421   3
   0 -15   7 94.3686 29.9112   1
   0 -15   6-2.95765 23.6094   1
   0  15  -5-4.58652 12.5008   1
   0 -15   5-34.3000 27.1260   1
   0  15  -4 55.6764 13.7591   1
   0 -15   4 67.1524 28.6303   1
   0  15  -3 606.312 34.1939   1
   0 -15   3 640.471 53.1381   1
   0  15  -2 521.525 31.4115   1
   0 -15   2 527.735 49.9750   1
   0  15  -1-4.15983 13.1085   1
   0 -15   1-3.99563 21.7354   1
   0 -15   0 12.5943 21.4794   1
   0  15   0 2.29088 12.0944   1
   0 -15  -1 34.8010 25.3022   1
   0  15   1 17.9464 13.4161   1
   0  15   2 24.0013 13.8855   1
   0 -15  -2-18.5265 21.7042   1
   0 -15  -3 273.925 36.1606   1
   0  15   3 225.246 23.4031   1
   0  15   4 260.547 24.5568   1
   0 -15  -4 289.792 36.9851   1
   0 -15  -5 2.96389 21.5038   1
   0  15   5 4.86267 12.6014   1
   0  15   6 115.660 18.0562   1
   0 -15  -6 220.327 34.0795   1
   0 -15  -7 495.097 45.0391   1
   0  15   7 558.791 33.6009   1
   0  15   8 234.809 23.5155   1
   0 -15  -8 247.311 33.7135   1
   0 -15  -9 596.739 46.5304   1
   0  15   9 558.528 33.7827   1
   0  15  10 43.9686 15.2933   1
   0 -15 -10 46.1198 22.2060   1
   0 -15 -11 1.32939 18.9272   1
   0  15  11 12.4906 13.7199   1
   0  15  12 14.4372 13.9919   1
   0 -15 -12-4.94115 19.9152   1
   0  15  13 122.127 19.7488   1
   0 -15 -13 188.206 28.4488   1
   0 -15 -14 6.34841 18.7557   1
   0  15  14-8.48480 14.0865   1
   0  15  15 366.926 29.7923   1
   0 -15 -15 439.939 37.1690   1
   0  15  16 14.4305 14.7035   1
   0 -15 -17 103.259 23.8406   3
   0  15  17 126.874 21.2356   1
   0 -15 -18 822.053 51.5530   3
   0  15  18 820.569 44.0946   1
   0 -15 -19 125.930 27.1980   3
   0  15  19 135.903 22.0718   1
   0  15  20 152.419 23.7979   1
   0 -15 -20 112.012 25.9640   3
   0 -15 -21 20.9314 22.8870   3
   0  15  21 10.1892 15.8926   1
   0 -15 -22 54.0162 23.5578   3
   0  15  22 47.7750 19.3285   1
   0  16  -4 8.06530 13.4760   1
   0 -16   4 9.64415 26.2238   1
   0  16  -3 18.2000 13.2186   1
   0 -16   2 52.1156 26.7716   1
   0  16  -2 66.7759 16.1677   1
   0 -16   1 207.563 36.6753   1
   0  16  -1 166.935 21.8148   1
   0  16   0 78.3482 17.7458   1
   0 -16   0 52.2107 28.8670   1
   0 -16  -1 47.3918 27.6000   1
   0  16   1 8.64335 13.3609   1
   0 -16  -2 402.232 46.0659   1
   0  16   2 368.298 29.1159   1
   0 -16  -3 876.881 60.7020   1
   0  16   3 733.915 39.5908   1
   0 -16  -4 122.946 33.3992   1
   0  16   4 116.253 18.8200   1
   0 -16  -5 45.0151 26.6854   1
   0  16   5 94.6513 18.4020   1
   0 -16  -6-26.2407 24.3871   1
   0  16   6-5.80705 13.6004   1
   0 -16  -7-25.9375 26.1070   1
   0  16   7 54.2477 16.4326   1
   0  16   8 68.9974 17.9988   1
   0 -16  -8 83.6321 26.5034   1
   0 -16  -9 309.250 38.1628   1
   0  16   9 200.808 23.2268   1
   0  16  10 10.6263 14.9083   1
   0 -16 -10 23.6665 24.0580   1
   0  16  11 49.8766 18.3832   1
   0 -16 -11 6.53212 23.0384   1
   0  16  12 143.482 21.2133   1
   0 -16 -12 182.589 30.7733   1
   0 -16 -13 270.898 34.5535   1
   0  16  13 302.540 28.2809   1
   0 -16 -14 733.123 49.3837   1
   0  16  14 628.817 39.2400   1
   0  16  15 92.8434 19.5552   1
   0  16  16 32.6702 16.7800   1
   0 -16 -17 13.1449 20.4063   3
   0  16  17 58.8177 19.0433   1
   0 -16 -18 56.4915 24.2668   3
   0  16  18 66.6013 18.9805   1
   0 -16 -19 48.9201 25.0145   3
   0  16  19 14.5034 15.8567   1
   0 -16 -20 516.227 46.6934   3
   0  17  -1 574.434 35.8883   1
   0  17   0-1.77039 15.0730   1
   0 -17  -1 10.1060 29.6837   1
   0  17   1 26.9543 15.6165   1
   0  17   2 7.69575 16.1674   1
   0 -17  -2-28.8708 30.2822   1
   0 -17  -3 23.2945 26.3351   1
   0  17   3-7.47759 15.7878   1
   0  17   4 51.1964 17.4276   1
   0 -17  -4 51.5681 26.2499   1
   0 -17  -5 128.980 33.8721   1
   0  17   5 85.5477 18.8259   1
   0  17   6-1.41261 15.3382   1
   0 -17  -6 11.0306 25.2591   1
   0 -17  -7 34.9519 25.8203   1
   0  17   7 44.0255 18.1416   1
   0 -17  -8 643.263 54.4085   1
   0  17   8 442.184 33.6386   1
   0  17   9 136.358 22.0309   1
   0 -17  -9 176.151 33.1873   1
   0  17  10 319.863 30.5463   1
   0 -17 -10 326.341 39.9813   1
   0  17  11 69.4221 19.2016   1
   0 -17 -11 68.3832 28.2861   1
   0 -17 -12-1.76636 24.1491   1
   0  17  12 20.9921 16.9589   1
   0 -17 -13-12.0763 21.6413   1
   0  17  13 2.20770 15.2853   1
   0  17  14 118.028 22.8552   1
   0  17  15-11.2039 16.0757   1
   0 -17 -17-20.0697 24.7004   3
   0 -18 -11 30.6647 27.9811   1
   0 -18 -12 59.2621 28.1247   1
  -1  17  14 11.6408 15.5075   1
   1 -17 -14-2.72411 21.8322   1
  -1  17  13 7.58932 15.6040   1
   1 -17 -13 58.9568 28.4073   1
   1 -17 -12 343.560 41.4917   1
  -1  17  12 335.030 31.4805   1
   1 -17 -11 615.156 52.3852   1
  -1  17  11 559.709 37.5956   1
  -1  17  10 33.5996 16.7227   1
   1 -17 -10 62.2398 28.0162   1
   1 -17  -9 36.6661 26.7563   1
  -1  17   9 4.74167 14.8833   1
   1 -17  -8 22.5753 29.1009   1
  -1  17   8 14.2209 16.3390   1
   1 -17  -7-6.71495 27.5732   1
  -1  17   7-4.78886 15.2326   1
   1 -17  -6 73.0594 31.3500   1
  -1  17   6 70.8520 18.6149   1
   1 -17  -5 131.970 35.9791   1
  -1  17   5 173.264 23.6121   1
   1 -17  -4 53.6539 29.2703   1
  -1  17   4 78.7014 19.1658   1
   1 -17  -3 34.3967 28.8043   1
  -1  17   3 49.9836 18.6586   1
   1 -17  -2 339.164 46.8098   1
  -1  17   2 352.144 31.2897   1
   1 -17  -1 243.954 41.5421   1
  -1  17   1 186.011 23.8089   1
  -1  17   0 341.805 29.0463   1
  -1  17  -1 35.2905 15.6510   1
  -1  17  -2 18.5433 16.0948   1
   1 -16 -20 147.045 29.1297   3
   1 -16 -19 22.6942 21.9820   3
   1 -16 -18 118.442 27.6275   3
  -1  16  18 101.551 22.2374   1
  -1  16  17 125.310 22.7874   1
  -1  16  16 423.522 34.7972   1
  -1  16  15 515.544 36.2822   1
   1 -16 -15 598.421 46.0079   1
   1 -16 -14 31.8243 24.6358   1
  -1  16  14 3.08696 14.1543   1
   1 -16 -13-13.1391 23.4817   1
  -1  16  13 4.63114 14.1307   1
   1 -16 -12 67.0734 28.1805   1
  -1  16  12 71.8994 17.8312   1
   1 -16 -11 104.576 27.5553   1
  -1  16  11 118.960 21.5279   1
   1 -16 -10 77.1957 27.0548   1
  -1  16  10 75.1002 18.7691   1
   1 -16  -9 189.006 35.1944   1
  -1  16   9 142.216 21.5902   1
   1 -16  -8-24.6562 26.1277   1
  -1  16   8-1.63869 14.1055   1
   1 -16  -7 415.200 45.6358   1
  -1  16   7 309.876 28.0049   1
  -1  16   6 955.775 44.8322   1
   1 -16  -6 1028.28 64.7178   1
   1 -16  -5 162.481 33.5203   1
  -1  16   5 90.2767 18.2484   1
  -1  16   4 196.719 23.3663   1
   1 -16  -4 228.808 38.5702   1
  -1  16   3 4.92309 13.4847   1
   1 -16  -3 8.83963 23.3102   1
   1 -16  -2-10.3761 27.1475   1
  -1  16   2 3.62561 14.0910   1
   1 -16  -1 14.0579 24.8607   1
  -1  16   1 1.65025 13.3977   1
   1 -16   0 167.521 35.9839   1
  -1  16   0 174.339 21.1153   1
   1 -16   1 104.393 31.7595   1
  -1  16  -1 89.1133 18.0405   1
   1 -16   2 65.4650 30.3768   1
  -1  16  -2 76.3752 17.6124   1
   1 -16   3 65.7308 31.4529   1
  -1  16  -3 56.8434 16.4257   1
   1 -16   4 90.7739 31.6386   1
   1 -15 -22 328.143 36.2709   3
   1 -15 -21 173.125 29.2109   3
  -1  15  21 253.756 30.0571   1
  -1  15  20 199.559 25.6305   1
   1 -15 -20 208.803 31.3039   3
   1 -15 -19 93.9766 25.0686   3
  -1  15  19 61.5889 18.0628   1
  -1  15  18 0.48480 14.4091   1
   1 -15 -18 30.0320 19.0809   3
  -1  15  17 33.1140 17.4109   1
  -1  15  16-4.80299 13.4276   1
   1 -15 -16 0.19440 19.3302   1
  -1  15  15 233.681 25.1399   1
   1 -15 -15 200.703 30.9564   1
  -1  15  14 7.63495 14.4114   1
   1 -15 -14 5.35698 19.8229   1
  -1  15  13 32.6790 14.3906   1
   1 -15 -13 14.7710 21.9371   1
  -1  15  12 70.5750 17.8940   1
   1 -15 -12 55.8762 22.2358   1
   1 -15 -11 517.197 45.0564   1
  -1  15  11 368.660 29.1253   1
   1 -15 -10 1440.22 70.3431   1
  -1  15  10 1327.01 51.1735   1
   1 -15  -9 54.2243 24.4615   1
  -1  15   9 57.5900 15.5692   1
  -1  15   8 18.7572 14.1507   1
   1 -15  -8-10.3861 21.3549   1
  -1  15   7 78.0519 17.3106   1
   1 -15  -7 48.2317 22.2514   1
   1 -15  -6-4.46019 21.4719   1
  -1  15   6-18.7524 14.2183   1
  -1  15   5 11.4583 13.0389   1
   1 -15  -5-6.05880 20.5500   1
   1 -15  -4 144.736 30.5473   1
  -1  15   4 171.964 20.8823   1
   1 -15  -3 36.8296 24.0294   1
  -1  15   3 23.0064 13.5092   1
  -1  15   2 38.9067 14.7961   1
   1 -15  -2 48.3715 24.7310   1
   1 -15  -1 411.512 43.0626   1
  -1  15   1 403.572 28.7797   1
   1 -15   0 225.607 36.6759   1
  -1  15   0 165.662 19.7933   1
   1 -15   1 416.696 43.8661   1
  -1  15  -1 499.525 30.3333   1
   1 -15   2 89.2794 28.4130   1
  -1  15  -2 88.7126 16.9495   1
   1 -15   3 40.1259 25.2337   1
  -1  15  -3-6.19552 12.0390   1
   1 -15   4-37.6642 30.2665   1
  -1  15  -4 4.86731 11.5799   1
   1 -15   5 24.3177 25.2492   1
   1 -15   6 40.7989 27.1313   1
   1 -15   7 165.565 35.7152   1
   1 -14 -24 161.653 30.5922   3
  -1  14  23 10.5755 16.1402   1
   1 -14 -23 1.69354 20.6063   3
  -1  14  22 35.8062 17.0824   1
   1 -14 -22 50.7456 23.6289   3
  -1  14  21 74.1046 20.1382   1
   1 -14 -21 81.8663 24.0587   3
   1 -14 -20 33.7856 22.3634   3
  -1  14  20 6.37705 15.7360   1
   1 -14 -19 122.081 25.1950   3
  -1  14  19 90.4106 19.1943   1
  -1  14  18-0.60026 14.3265   1
   1 -14 -18 2.65116 17.1231   3
  -1  14  17 83.9228 18.6896   1
  -1  14  16 144.196 21.2989   1
   1 -14 -16 140.130 23.7560   1
   1 -14 -15 360.985 34.2355   1
  -1  14  15 358.593 28.6141   1
  -1  14  14 1069.47 45.7164   1
   1 -14 -14 1243.13 59.5765   1
   1 -14 -13 74.6859 23.9739   1
  -1  14  13 94.7075 17.5313   1
  -1  14  12-12.6488 13.1779   1
   1 -14 -12-18.2538 19.7368   1
   1 -14 -11 275.238 33.5116   1
  -1  14  11 269.929 24.5430   1
  -1  14  10 16.9933 11.7724   1
   1 -14 -10 84.2488 23.4622   1
  -1  14   9 10.3316 11.8450   1
   1 -14  -9 31.6574 22.3206   1
  -1  14   8 206.990 21.4901   1
   1 -14  -8 219.678 31.2532   1
  -1  14   7 37.9324 13.8523   1
   1 -14  -7-10.2344 18.9642   1
   1 -14  -6 104.863 26.0958   1
  -1  14   6 138.212 18.6051   1
  -1  14   5 962.402 40.9444   1
   1 -14  -5 1101.77 61.3788   1
  -1  14   4 229.844 21.9436   1
   1 -14  -4 285.864 35.1015   1
   1 -14  -3 235.735 33.1319   1
  -1  14   3 220.650 21.5643   1
  -1  14   2 7.94484 11.3652   1
   1 -14  -2 23.7477 21.0706   1
   1 -14  -1-12.5464 21.0659   1
  -1  14   1 16.3302 11.6250   1
  -1  14   0 8.37118 11.6652   1
   1 -14   0-24.6897 21.9063   1
  -1  14  -1 107.465 16.9480   1
   1 -14   1 133.335 27.2056   1
  -1  14  -2 16.8045 12.0143   1
   1 -14   2 47.3056 23.2978   1
  -1  14  -3 37.6283 12.6825   1
   1 -14   3 74.1240 25.4490   1
  -1  14  -4 82.5543 15.1663   1
   1 -14   4 126.764 28.3095   1
  -1  14  -5 76.1226 14.8035   1
   1 -14   5 11.5094 22.5486   1
   1 -14   6 578.663 50.1684   1
   1 -14   7 389.274 43.3594   1
   1 -14   8 84.1564 25.9121   1
   1 -14   9-28.0533 28.9625   1
   1 -14  10-15.1912 24.2150   1
  -1  13  23 20.0294 15.7617   1
   1 -13 -23 28.7462 20.5066   3
  -1  13  22 20.2160 15.1434   1
   1 -13 -22 28.5019 20.1882   3
  -1  13  21 366.659 31.3482   1
   1 -13 -21 417.371 36.7473   3
   1 -13 -20 215.398 28.6775   3
  -1  13  20 257.910 26.9793   1
  -1  13  19 194.122 23.0689   1
   1 -13 -19 184.170 26.0553   3
   1 -13 -18 412.952 34.6876   3
  -1  13  18 367.884 28.9124   1
  -1  13  17 38.3965 15.4886   1
  -1  13  16 38.4325 15.6498   1
   1 -13 -16 30.7172 17.2948   1
  -1  13  15 282.059 24.7471   1
   1 -13 -15 233.484 28.0521   1
  -1  13  14 157.728 19.3797   1
   1 -13 -14 123.268 23.4023   1
  -1  13  13 2.93884 12.2620   1
   1 -13 -13 5.14031 16.9603   1
  -1  13  12 33.5112 13.0132   1
   1 -13 -12-6.60474 17.3021   1
  -1  13  11 37.5686 12.7167   1
   1 -13 -11 89.1703 23.4472   1
   1 -13 -10 507.430 40.6964   1
  -1  13  10 548.111 30.9409   1
   1 -13  -9 2358.46 80.7537   1
  -1  13   9 2273.60 59.5415   1
   1 -13  -8 201.254 28.6042   1
  -1  13   8 154.944 18.8814   1
  -1  13   7 68.9380 14.3764   1
   1 -13  -7 95.9448 23.0463   1
   1 -13  -6 40.1315 19.5365   1
  -1  13   6 62.6124 13.6989   1
   1 -13  -5 11.2564 19.5893   1
  -1  13   5 0.32505 10.3438   1
  -1  13   4 11.3856 10.8225   1
   1 -13  -4-3.90547 16.8540   1
  -1  13   3 158.678 18.2633   1
   1 -13  -3 117.485 24.6847   1
   1 -13  -2 0.20849 17.8385   1
  -1  13   2 56.8729 13.2502   1
   1 -13  -1 25.8027 21.8088   1
  -1  13   1 11.2269 11.2511   1
  -1  13   0 805.759 35.0968   1
   1 -13   0 750.395 49.3034   1
   1 -13   1 141.214 25.7695   1
  -1  13  -1 155.691 17.7860   1
  -1  13  -2 505.310 27.9139   1
   1 -13   2 413.802 39.9141   1
   1 -13   3 176.309 28.9278   1
  -1  13  -3 206.558 19.4572   1
   1 -13   4-13.8871 19.5469   1
  -1  13  -4-2.18475 9.31169   1
  -1  13  -5 13.7428 10.5722   1
   1 -13   5 14.9257 22.7139   1
  -1  13  -6-2.99708 10.2895   1
   1 -13   6 53.6553 25.4290   1
   1 -13   7 7.76891 20.1327   1
   1 -13   8 126.715 28.5851   1
   1 -13   9 21.1792 21.8881   1
   1 -13  10-7.35140 21.0459   1
   1 -13  11 467.993 46.0722   1
   1 -13  12 474.186 47.0113   1
   1 -13  13 208.406 38.2990   1
   1 -12 -25 705.710 47.3736   2
   1 -12 -23 42.1677 19.6434   3
  -1  12  22 2.72546 13.8887   1
   1 -12 -22 16.7169 16.8807   3
  -1  12  21 17.4157 13.8372   1
   1 -12 -21 28.9643 17.9708   3
   1 -12 -20 70.8313 19.5509   3
  -1  12  20 92.3572 18.5420   1
  -1  12  19 139.093 19.7473   1
   1 -12 -19 143.460 23.8490   3
   1 -12 -18 181.336 25.0602   3
  -1  12  18 177.640 20.5867   1
   1 -12 -17 29.4415 16.9897   3
   1 -12 -17 3.44282 14.5034   1
  -1  12  17 23.4693 13.2833   1
   1 -12 -16 41.3807 17.9503   1
  -1  12  16 35.6551 13.3555   1
  -1  12  15 210.367 21.2566   1
   1 -12 -15 205.960 25.2060   1
  -1  12  14 269.920 22.6112   1
   1 -12 -14 290.046 29.2069   1
  -1  12  13 1681.03 51.1618   1
   1 -12 -13 1744.80 63.6212   1
   1 -12 -12 72.5126 20.2414   1
  -1  12  12 54.5742 13.0463   1
   1 -12 -11 6.95782 15.5700   1
  -1  12  11 2.10958 9.53411   1
   1 -12 -10 468.653 37.1235   1
  -1  12  10 430.003 26.0081   1
  -1  12   9 15.1135 10.4244   1
   1 -12  -9 19.4036 16.5455   1
   1 -12  -8 8.02400 17.4714   1
  -1  12   8 10.6371 10.5081   1
   1 -12  -7 148.331 25.2539   1
  -1  12   7 120.734 15.6967   1
  -1  12   6 11.0992 10.2512   1
   1 -12  -6-5.08636 16.1819   1
   1 -12  -5 361.781 34.2040   1
  -1  12   5 417.846 24.8193   1
   1 -12  -4 2597.86 81.5984   1
  -1  12   4 2547.55 57.8799   1
  -1  12   3 463.832 26.0997   1
   1 -12  -3 476.085 38.0758   1
  -1  12   2 495.890 26.3838   1
   1 -12  -2 499.569 37.7280   1
   1 -12  -1 145.282 25.7723   1
  -1  12   1 101.634 14.7344   1
   1 -12   0 23.9152 17.3977   1
  -1  12   0 22.4317 10.4415   1
  -1  12  -1 14.3763 10.0589   1
   1 -12   1-6.74803 16.7980   1
  -1  12  -2 8.41725 9.56376   1
   1 -12   2 11.0604 16.8773   1
   1 -12   3 18.7494 18.9399   1
  -1  12  -3 0.91291 8.56025   1
  -1  12  -3-7.10587 9.26629   2
   1 -12   4 51.2951 21.1716   1
  -1  12  -4 34.9996 10.5225   2
  -1  12  -4 40.1547 11.3850   1
   1 -12   5 52.6494 21.9758   1
  -1  12  -5 56.4510 11.6252   1
  -1  12  -5 42.3925 12.8249   2
  -1  12  -6 77.4746 12.2109   1
  -1  12  -6 74.9177 12.9784   2
   1 -12   6 61.4805 22.1213   1
  -1  12  -7 695.869 32.9445   2
  -1  12  -7 647.855 28.2045   1
   1 -12   7 692.079 48.2722   1
   1 -12   8 766.540 51.0471   1
  -1  12  -8 787.558 35.9633   2
   1 -12   9 70.7843 24.1291   1
  -1  12  -9 91.3613 15.4325   2
   1 -12  10-7.27621 21.9768   1
  -1  12 -10 0.48327 12.0717   2
   1 -12  11 11.1483 22.2488   1
  -1  12 -11-9.19947 13.2202   2
   1 -12  12 101.238 26.6889   1
  -1  12 -12 81.8099 16.6188   2
  -1  12 -13 191.446 22.3032   2
   1 -12  13 102.147 28.3621   1
  -1  12 -14 150.412 21.7305   2
   1 -12  14 96.1252 24.5001   1
  -1  12 -15 14.6204 13.3799   2
   1 -11 -26 156.434 27.8992   2
   1 -11 -25 57.9961 20.1581   2
   1 -11 -23 52.4140 19.2702   3
  -1  11  22 0.14302 13.9691   1
   1 -11 -22-1.38409 16.9898   3
  -1  11  21-9.83377 12.3649   1
   1 -11 -21-3.60697 15.5384   3
  -1  11  20 370.876 27.8098   1
   1 -11 -20 379.640 32.3893   3
   1 -11 -19 206.359 24.9984   3
  -1  11  19 185.272 20.8282   1
   1 -11 -18 116.985 21.6815   3
  -1  11  18 117.999 17.4000   1
  -1  11  17 525.379 30.2536   1
   1 -11 -17 542.300 31.0643   1
   1 -11 -17 526.242 34.8689   3
   1 -11 -16 38.4450 15.6706   1
  -1  11  16 10.3181 10.9951   1
  -1  11  15 50.0908 12.5738   1
   1 -11 -15 71.7008 18.7588   1
  -1  11  14 330.643 23.7138   1
   1 -11 -14 327.237 28.4091   1
  -1  11  13 144.635 16.6405   1
   1 -11 -13 153.560 22.2568   1
  -1  11  12 3.43290 9.70079   1
   1 -11 -12-4.73617 13.9970   1
  -1  11  11 177.819 17.1843   1
   1 -11 -11 180.021 24.5998   1
  -1  11  10 23.1563 9.86425   1
   1 -11 -10 23.4889 16.8099   1
  -1  11   9 250.337 19.5576   1
   1 -11  -9 228.965 26.7681   1
   1 -11  -8 3234.24 84.1589   1
  -1  11   8 3296.09 63.6687   1
   1 -11  -7 224.243 26.7970   1
  -1  11   7 231.291 18.7237   1
  -1  11   6 29.1265 9.38249   1
   1 -11  -6 71.4749 18.5587   1
  -1  11   5 199.194 17.1920   1
   1 -11  -5 155.430 22.5372   1
   1 -11  -4 7.16798 15.5328   1
  -1  11   4 2.43086 8.23997   1
   1 -11  -3 23.3995 15.3635   1
  -1  11   3 21.1130 9.22762   1
   1 -11  -2 122.463 21.6989   1
  -1  11   2 140.357 14.8050   1
   1 -11  -1 35.8041 18.0782   1
  -1  11   1 31.7313 8.02271   2
  -1  11   1 50.9077 11.0377   1
   1 -11   0 7.85014 15.1193   1
  -1  11   0-2.76907 6.74354   2
  -1  11   0 2.30793 8.53268   1
  -1  11  -1 830.694 29.7843   2
   1 -11   1 829.164 45.2656   1
  -1  11  -1 883.456 32.6803   1
  -1  11  -2 195.386 16.8506   1
   1 -11   2 206.455 26.1582   1
  -1  11  -2 173.983 15.0921   2
  -1  11  -3 633.711 27.4662   2
   1 -11   3 655.410 41.2043   1
  -1  11  -3 644.112 28.0518   1
   1 -11   4 737.867 44.4802   1
  -1  11  -4 717.765 28.8467   1
  -1  11  -4 683.794 29.1105   2
   1 -11   5 24.4446 18.3670   1
  -1  11  -5 20.4275 9.44960   2
  -1  11  -5 20.9172 9.76062   1
  -1  11  -6 34.0867 9.64008   2
   1 -11   6 42.9567 18.3664   1
  -1  11  -6 34.9760 10.5025   1
   1 -11   7 21.7321 17.0734   1
  -1  11  -7 3.24874 8.52466   1
  -1  11  -7 9.92447 9.41264   2
  -1  11  -8 72.8753 13.4074   2
  -1  11  -8 45.4741 10.0766   1
   1 -11   8 24.6520 18.0246   1
   1 -11   9 57.7734 19.4618   1
  -1  11  -9 81.3494 13.7654   2
  -1  11 -10 22.5627 12.0452   2
   1 -11  10 0.61770 17.7494   1
  -1  11 -11 0.94354 11.5799   2
   1 -11  11 12.7588 19.0639   1
   1 -11  12 361.914 36.5932   1
  -1  11 -12 379.812 27.1183   2
  -1  11 -13 798.217 38.5957   2
   1 -11  13 801.199 53.1692   1
  -1  11 -14 268.558 24.3880   2
   1 -11  14 211.748 33.8246   1
  -1  11 -15-16.1999 14.8580   2
  -1  11 -16 0.70923 13.0890   2
   1 -10 -26 16.9683 19.2056   2
   1 -10 -25-19.7024 18.9505   2
   1 -10 -24 472.696 36.9667   2
   1 -10 -23 211.366 26.2693   3
  -1  10  22 2.44325 12.8507   1
   1 -10 -22 9.91374 15.7795   3
   1 -10 -21-8.05722 15.4862   3
  -1  10  21 1.54495 13.0812   1
   1 -10 -20 21.9740 15.2663   3
  -1  10  20 16.8810 12.2716   1
  -1  10  19 100.037 16.3902   1
   1 -10 -19 112.624 20.0615   3
   1 -10 -18 265.864 25.9897   3
  -1  10  18 230.504 20.5731   1
   1 -10 -17 53.4720 13.3551   1
   1 -10 -17 55.3509 15.1330   3
  -1  10  17 53.1875 12.9188   1
   1 -10 -16 63.0621 15.7417   3
  -1  10  16 55.9586 12.5430   1
   1 -10 -16 54.7968 14.2607   1
  -1  10  15 43.8148 11.6212   1
   1 -10 -15 56.5914 14.9617   1
   1 -10 -14 217.827 23.0176   1
  -1  10  14 195.868 18.0072   1
   1 -10 -13 181.684 23.1146   1
  -1  10  13 155.241 16.6264   1
  -1  10  12 3075.80 60.7419   1
   1 -10 -12 3199.98 77.1573   1
   1 -10 -11 75.1861 17.1180   1
  -1  10  11 62.3753 11.9300   1
   1 -10 -10 10.7688 13.3893   1
  -1  10  10 9.82939 8.44873   1
   1 -10  -9 714.129 38.9777   1
  -1  10   9 657.719 27.9224   1
   1 -10  -8 24.8015 14.1443   1
  -1  10   8 7.24560 8.30747   1
  -1  10   7 44.0351 10.0405   1
   1 -10  -7-12.5966 15.5645   1
   1 -10  -6 115.845 19.9837   1
  -1  10   6 146.980 14.5781   1
   1 -10  -5 2.43714 13.8831   1
  -1  10   5 0.93280 8.10807   1
  -1  10   4 183.784 15.6933   1
  -1  10   4 156.081 12.4244   2
  -1  10   3 3442.53 51.7508   2
  -1  10   3 3244.21 58.4833   1
   1 -10  -3 3246.38 79.6097   1
  -1  10   2 497.383 24.1149   1
   1 -10  -2 416.400 30.7087   1
  -1  10   2 464.180 20.1074   2
   1 -10  -1 352.868 28.9693   1
  -1  10   1 309.881 17.0974   2
  -1  10   1 345.174 20.2630   1
   1 -10   0 100.111 18.4495   1
  -1  10   0 129.870 12.6475   2
  -1  10   0 111.122 13.1923   1
   1 -10   1 5.54784 12.8356   1
  -1  10  -1 19.4488 7.84013   2
  -1  10  -1-3.45301 8.36441   1
   1 -10   2 20.8119 13.1401   1
  -1  10  -2 50.9013 9.77637   2
  -1  10  -2 15.3166 8.54405   1
  -1  10  -3 9.25159 7.77543   1
   1 -10   3 8.81380 13.3707   1
  -1  10  -3 14.3778 7.35152   2
  -1  10  -4 4.93515 7.68560   1
   1 -10   4 12.8093 13.7641   1
  -1  10  -4-10.1809 8.15890   2
  -1  10  -5 59.0376 10.8943   2
  -1  10  -5 62.4699 10.0840   1
   1 -10   5 35.6004 17.2950   1
  -1  10  -6 82.2727 12.5079   2
   1 -10   6 82.7766 19.1122   1
  -1  10  -6 89.5354 11.2274   1
   1 -10   7 84.2862 19.9210   1
  -1  10  -7 46.9155 11.0149   2
  -1  10  -7 64.6210 10.3266   1
  -1  10  -8 560.816 28.2701   2
  -1  10  -8 631.821 24.4714   1
   1 -10   8 571.613 38.6095   1
  -1  10  -9 1388.20 33.8298   1
   1 -10   9 1455.67 60.0249   1
  -1  10  -9 1412.97 44.3806   2
  -1  10 -10 108.989 14.8826   2
   1 -10  10 80.1073 19.7258   1
  -1  10 -11-10.4313 11.5983   2
   1 -10  11-7.17913 17.0324   1
  -1  10 -12 59.0640 13.6883   2
   1 -10  12 48.9239 21.0778   1
   1 -10  13 197.693 28.9308   1
  -1  10 -13 242.788 22.1704   2
   1 -10  14 47.0413 19.9054   1
  -1  10 -14 98.8728 17.0313   2
  -1  10 -15 90.9845 17.6342   2
  -1  10 -16 47.5209 15.1237   2
  -1  10 -17 56.3660 16.4217   2
   1  -9 -27 75.6227 23.3761   2
   1  -9 -26 4.38427 17.7749   2
   1  -9 -25 151.954 24.8878   2
   1  -9 -24 55.6185 18.9865   2
   1  -9 -23 178.937 24.6803   2
   1  -9 -22 106.486 20.9601   3
  -1   9  21-1.95920 11.3658   1
   1  -9 -21-5.71263 14.3025   3
   1  -9 -20 9.59620 14.7759   3
  -1   9  20 26.0270 12.3648   1
   1  -9 -19 357.729 27.7359   3
  -1   9  19 311.003 23.5098   1
   1  -9 -18 221.443 22.7741   3
  -1   9  18 283.932 22.3463   1
  -1   9  17 9.44704 8.80615   1
   1  -9 -17 35.1408 11.6591   1
   1  -9 -17 1.59764 12.5810   3
  -1   9  16 645.569 29.8870   1
   1  -9 -16 663.411 33.8478   3
   1  -9 -16 694.867 31.3720   1
   1  -9 -15 51.7035 13.4137   3
  -1   9  15 50.9679 11.2409   1
   1  -9 -15 48.2064 13.6047   1
   1  -9 -14 23.5601 12.9655   1
  -1   9  14 32.0309 9.97258   1
  -1   9  13 1152.43 36.4315   1
   1  -9 -13 1231.75 45.3360   1
   1  -9 -12 60.1527 15.2087   1
  -1   9  12 37.8985 10.0802   1
  -1   9  11 46.9693 10.0175   1
   1  -9 -11 59.4096 15.0316   1
  -1   9  10 12.5259 8.35153   1
   1  -9 -10 37.1802 14.3713   1
  -1   9   9 52.0095 10.2454   1
   1  -9  -9 54.0823 15.4964   1
  -1   9   8 93.1804 11.6242   1
   1  -9  -8 133.178 19.7107   1
  -1   9   7 3480.55 57.5149   1
   1  -9  -7 3407.51 76.7356   1
  -1   9   6 219.317 12.7739   2
  -1   9   6 245.093 16.5954   1
  -1   9   5 48.4603 9.59316   1
  -1   9   5 51.5867 7.72967   2
   1  -9  -5 43.4479 13.5539   1
  -1   9   4 153.875 13.7362   1
  -1   9   4 110.483 9.96105   2
   1  -9  -4 120.007 17.7316   1
  -1   9   3 3.71658 5.09648   2
  -1   9   3 9.56795 7.07846   1
   1  -9  -3 1.12370 12.0145   1
  -1   9   2 33.6136 6.91557   2
   1  -9  -2 40.6184 13.0967   1
  -1   9   2 47.1943 9.51430   1
  -1   9   1 15.0788 8.39097   1
  -1   9   1 19.8800 6.59382   2
   1  -9   0 15.0191 12.4949   1
  -1   9   0 14.1772 8.07942   1
  -1   9   0 0.81231 5.70297   2
  -1   9  -1 13.2525 6.23794   2
  -1   9  -1 13.8318 7.17044   1
   1  -9   1 19.2295 12.4547   1
  -1   9  -2 1030.32 31.0804   1
   1  -9   2 1123.89 45.1738   1
  -1   9  -2 1130.13 31.3837   2
  -1   9  -3 217.260 15.6139   1
   1  -9   3 199.508 21.1947   1
  -1   9  -3 225.415 15.2856   2
  -1   9  -4 885.456 29.2973   2
   1  -9   4 930.111 41.9159   1
  -1   9  -4 980.731 30.0789   1
  -1   9  -5 1725.94 41.6743   2
  -1   9  -5 1713.72 39.0957   1
   1  -9   6 27.8670 13.2445   1
  -1   9  -6 31.7361 9.16702   2
  -1   9  -6 14.5660 7.61504   1
   1  -9   7 27.5455 13.9434   1
  -1   9  -7 31.0851 8.84030   2
  -1   9  -7 29.3317 8.24470   1
   1  -9   8 78.1016 17.3313   1
  -1   9  -8 51.1975 10.8545   2
  -1   9  -8 68.7374 9.64208   1
  -1   9  -9 128.360 14.8031   2
  -1   9  -9 128.996 11.5871   1
  -1   9 -10 150.899 16.5483   2
   1  -9  10 107.328 19.3262   1
   1  -9  11 52.9927 18.6321   1
  -1   9 -11 17.3289 10.3720   2
  -1   9 -12 35.9390 11.8296   2
   1  -9  12 22.8498 15.9561   1
   1  -9  13 244.313 28.8333   1
  -1   9 -13 311.120 23.8211   2
   1  -9  14 1320.46 59.8767   1
  -1   9 -14 1278.52 45.4531   2
  -1   9 -15 270.792 23.4323   2
  -1   9 -16 28.2131 13.0652   2
  -1   9 -17-1.05460 12.0164   2
  -1   9 -18 139.102 19.7317   2
  -1   9 -19 6.77818 13.6430   2
   1  -8 -27 89.1564 23.0216   2
   1  -8 -26 21.9395 18.5277   2
   1  -8 -25 19.3112 15.6595   2
   1  -8 -24-2.01632 14.5353   2
   1  -8 -23 475.757 34.7243   2
   1  -8 -22 170.608 23.0553   2
   1  -8 -22 218.002 24.5580   3
  -1   8  21 6.07100 10.8346   1
   1  -8 -21-0.13707 12.7113   3
   1  -8 -20 82.1229 17.5541   3
  -1   8  20 108.736 16.3357   1
   1  -8 -19 15.7640 12.0107   3
  -1   8  19 44.6658 12.9264   1
   1  -8 -18 57.0374 14.1557   3
  -1   8  18 79.3015 13.3704   1
  -1   8  17 678.399 30.0778   1
   1  -8 -17 699.391 33.9578   3
   1  -8 -16 92.2998 15.8463   3
  -1   8  16 78.0534 12.4647   1
   1  -8 -16 80.0886 12.2372   1
  -1   8  15 95.4136 12.6600   1
   1  -8 -15 89.1625 13.5992   1
   1  -8 -15 73.1688 13.7947   3
   1  -8 -14 13.5887 9.57239   1
  -1   8  14 13.3881 7.81631   1
  -1   8  13 97.7873 11.7982   1
   1  -8 -13 103.854 15.3379   1
  -1   8  12 19.2533 7.82436   1
   1  -8 -12 29.0737 12.5678   1
   1  -8 -11 2976.46 66.8129   1
  -1   8  11 3077.56 53.8583   1
  -1   8  10 100.830 11.8358   1
   1  -8 -10 82.7756 15.6699   1
  -1   8   9 26.2323 8.29622   1
   1  -8  -9 23.7559 12.0279   1
  -1   8   8 1263.18 33.2639   1
  -1   8   8 1270.48 26.9822   2
   1  -8  -8 1408.31 46.9676   1
   1  -8  -7 31.1741 12.7111   1
  -1   8   7 10.9138 6.92780   1
  -1   8   7 21.8265 5.42430   2
   1  -8  -6 151.119 17.6797   1
  -1   8   6 155.964 10.2967   2
  -1   8   6 172.278 13.4434   1
  -1   8   5 14.2080 6.84426   1
  -1   8   5 6.82060 4.34426   2
   1  -8  -4 3.84133 10.3749   1
  -1   8   4-1.88679 6.63814   1
  -1   8   4-1.76019 4.49721   2
  -1   8   3 66.8090 9.20799   1
  -1   8   3 84.0798 8.44138   2
   1  -8  -3 90.2853 15.7732   1
  -1   8   2 3206.53 44.3066   2
   1  -8  -2 3263.46 68.9095   1
  -1   8   2 3292.42 51.4878   1
  -1   8   1 390.156 18.6631   1
  -1   8   1 386.884 16.2877   2
   1  -8  -1 440.702 26.7990   1
  -1   8   0 238.743 15.2181   1
  -1   8   0 215.923 12.9839   2
   1  -8   0 208.457 19.7525   1
  -1   8  -1 172.775 12.1496   2
  -1   8  -1 166.578 12.9085   1
   1  -8   1 156.500 17.8940   1
  -1   8  -2 13.1073 7.02745   1
   1  -8   2 0.86744 9.54007   1
  -1   8  -2 14.4309 6.46355   2
  -1   8  -3 96.6306 10.1169   2
  -1   8  -3 122.145 11.2848   1
   1  -8   3 89.8680 15.6986   1
  -1   8  -4 164.724 13.1931   2
  -1   8  -4 154.328 12.6316   1
   1  -8   4 172.878 18.4357   1
  -1   8  -5 45.2604 9.05026   2
   1  -8   5 40.4861 13.0605   1
  -1   8  -5 32.3300 7.34916   1
  -1   8  -6 21.2272 7.03749   1
  -1   8  -6 18.3787 7.78596   2
   1  -8   6 19.7813 11.2431   1
   1  -8   7 121.211 17.7490   1
  -1   8  -7 76.9168 11.1950   2
  -1   8  -7 105.454 10.4431   1
  -1   8  -8 20.6045 6.92648   1
   1  -8   8 24.2668 13.2644   1
  -1   8  -8 34.0419 9.37218   2
  -1   8  -9 753.276 29.9730   2
   1  -8   9 776.068 38.8195   1
  -1   8  -9 774.830 22.8081   1
  -1   8 -10 2321.17 52.6294   2
  -1   8 -10 2184.27 35.0454   1
   1  -8  10 2413.58 67.1942   1
   1  -8  11 113.246 18.6936   1
  -1   8 -11 125.687 15.6313   2
  -1   8 -12-2.59931 9.71365   2
   1  -8  12-7.15285 13.7195   1
  -1   8 -13 26.0476 11.3097   2
   1  -8  13 25.9083 13.9763   1
  -1   8 -14 380.532 25.8094   2
   1  -8  14 366.396 31.9017   1
  -1   8 -15 48.1395 13.5229   2
  -1   8 -16 97.9043 17.7945   2
  -1   8 -17 34.7259 14.4286   2
  -1   8 -18 33.2339 14.1425   2
  -1   8 -19 618.308 35.7295   2
  -1   8 -20 160.348 21.8416   2
   1  -7 -27 757.178 46.7702   2
   1  -7 -26 44.1901 18.0126   2
   1  -7 -25-0.70082 16.2105   2
   1  -7 -24 70.6085 19.3938   2
   1  -7 -23 11.8815 14.3273   2
   1  -7 -22 98.7694 18.9198   2
   1  -7 -22 119.406 18.8550   3
   1  -7 -21 240.371 24.3183   2
   1  -7 -21 256.155 25.0663   3
  -1   7  21 250.458 22.4385   1
   1  -7 -20 10.7281 12.5020   3
  -1   7  20 21.6081 11.3690   1
   1  -7 -20 9.16617 11.9176   2
   1  -7 -19 23.4735 13.1121   3
  -1   7  19 15.1436 10.4450   1
   1  -7 -18 171.379 19.0665   3
  -1   7  18 216.718 18.2581   1
   1  -7 -17 310.238 22.9309   3
  -1   7  17 322.089 20.8773   1
   1  -7 -16 0.49216 9.51976   3
   1  -7 -16 1.10393 7.99662   1
  -1   7  16 1.14107 7.58996   1
  -1   7  15 1473.64 39.4456   1
   1  -7 -15 1441.78 43.5381   3
   1  -7 -15 1385.25 37.3291   1
   1  -7 -14 7.58655 9.08395   3
   1  -7 -14-5.64092 9.08416   1
  -1   7  14-3.70340 7.10154   1
   1  -7 -13 5.35265 9.79557   1
  -1   7  13 13.6852 7.21330   1
   1  -7 -12 1586.17 45.1375   1
  -1   7  12 1539.77 37.4575   1
   1  -7 -11 35.0825 11.9627   1
  -1   7  11 22.2759 7.41803   1
  -1   7  10 101.570 10.8523   1
   1  -7 -10 115.862 15.2251   1
   1  -7  -9 4.39391 9.28546   1
  -1   7   9 6.21996 5.75870   1
  -1   7   9-1.13481 3.76142   2
  -1   7   8 83.2887 7.73493   2
  -1   7   8 95.7973 9.83652   1
   1  -7  -8 68.6366 12.8065   1
  -1   7   7 73.7379 7.12141   2
  -1   7   7 60.7509 8.59555   1
   1  -7  -7 76.4170 13.9297   1
   1  -7  -6 4067.93 73.1149   1
  -1   7   6 4094.85 44.8829   2
  -1   7   6 4140.31 54.4193   1
  -1   7   5 270.829 12.1257   2
  -1   7   5 259.637 14.5074   1
   1  -7  -5 305.707 21.8363   1
  -1   7   4 94.9063 9.63595   1
   1  -7  -4 115.836 14.9962   1
  -1   7   4 95.1248 7.86849   2
  -1   7   3 35.9876 5.74543   2
   1  -7  -3 38.7885 11.1582   1
  -1   7   3 44.3565 7.82021   1
  -1   7   2 12.6277 4.56957   2
  -1   7   2 10.3053 6.05964   1
   1  -7  -2 3.73593 9.11452   1
  -1   7   1 67.6294 8.91960   1
   1  -7  -1 86.5991 13.1770   1
  -1   7   1 89.4659 8.24122   2
  -1   7   0 245.506 13.9980   1
  -1   7   0 262.412 13.0526   2
   1  -7   0 254.669 19.2081   1
   1  -7   1 1.08197 8.44130   1
  -1   7  -1 2.28341 4.94660   2
  -1   7  -1-2.25303 5.64789   1
   1  -7   2 12.8587 9.25448   1
  -1   7  -2 21.9606 5.87877   2
  -1   7  -2 17.8935 6.02731   1
   1  -7   3 613.131 28.5128   1
  -1   7  -3 587.917 20.7215   1
  -1   7  -3 644.400 21.5630   2
   1  -7   4 142.766 15.4473   1
  -1   7  -4 153.543 11.5002   1
  -1   7  -4 160.982 11.9453   2
  -1   7  -5 462.776 18.3623   1
  -1   7  -5 470.537 20.0458   2
   1  -7   5 449.791 25.6985   1
  -1   7  -6 1796.68 38.8828   2
  -1   7  -6 1839.19 34.7362   1
   1  -7   6 1714.69 48.6654   1
   1  -7   7 21.8392 10.8985   1
  -1   7  -7 19.5601 7.42165   2
  -1   7  -7 12.4033 5.42651   1
  -1   7  -8 141.662 14.0029   2
   1  -7   8 124.716 16.6411   1
  -1   7  -8 133.635 10.3441   1
  -1   7  -9 808.103 21.2955   1
   1  -7   9 735.644 34.7577   1
  -1   7  -9 785.341 29.1488   2
   1  -7  10 373.763 26.3055   1
  -1   7 -10 373.716 21.4340   2
  -1   7 -10 363.062 13.6511   1
   1  -7  11 81.1648 15.6144   1
  -1   7 -11 134.568 14.8592   2
  -1   7 -12 39.7356 10.5747   2
   1  -7  12 68.3990 15.5870   1
   1  -7  13-15.6067 12.7058   1
  -1   7 -13 1.23356 8.65669   2
   1  -7  14 158.929 22.0943   1
  -1   7 -14 159.131 17.3406   2
  -1   7 -15 1588.05 48.1221   2
  -1   7 -16 233.632 21.4582   2
  -1   7 -17 62.5845 14.2562   2
  -1   7 -18 16.6226 12.4951   2
  -1   7 -19 204.881 22.4172   2
  -1   7 -20 3.10100 13.3323   2
  -1   7 -21 17.1963 14.4250   2
   1  -6 -27 68.2944 20.1902   2
   1  -6 -26 59.6056 18.3189   2
   1  -6 -25 55.8400 18.3100   2
   1  -6 -24 45.9669 18.9999   2
   1  -6 -23 34.6464 16.0681   2
   1  -6 -22 502.764 33.1233   2
   1  -6 -21 211.579 21.9833   3
   1  -6 -21 231.039 23.5511   2
  -1   6  20 21.6732 10.0742   1
   1  -6 -20 11.9026 10.9145   3
   1  -6 -20 28.0483 13.8698   2
   1  -6 -19 165.978 19.1122   3
   1  -6 -19 220.979 21.7548   2
  -1   6  19 190.671 17.8479   1
  -1   6  18 67.8281 12.4291   1
   1  -6 -18 30.6675 12.5429   3
   1  -6 -17 33.7978 12.1943   3
  -1   6  17 8.30827 7.69380   1
   1  -6 -16 1538.27 30.9186   1
  -1   6  16 1525.78 40.4138   1
   1  -6 -16 1622.68 45.4178   3
  -1   6  15 84.6522 11.4432   1
   1  -6 -15 82.3771 12.5427   3
   1  -6 -15 75.4558 9.99881   1
   1  -6 -14 26.9896 7.77012   1
   1  -6 -14 13.3420 8.44922   3
  -1   6  14 23.4209 8.33090   1
   1  -6 -13 6.07623 8.61696   1
  -1   6  13 10.9012 7.24637   1
   1  -6 -13 1.22130 8.52395   3
  -1   6  12 146.792 12.3779   1
   1  -6 -12 120.070 13.4233   1
   1  -6 -11-8.72394 9.84582   1
  -1   6  11 1.35992 5.65387   1
  -1   6  10 3218.83 37.6597   2
  -1   6  10 3091.77 47.2381   1
   1  -6 -10 3111.09 59.8608   1
  -1   6   9 194.199 12.7479   1
   1  -6  -9 171.529 16.1434   1
  -1   6   9 201.456 9.95826   2
  -1   6   8 4.99075 3.46716   2
  -1   6   8 5.80788 5.33958   1
   1  -6  -8-1.69652 8.94768   1
  -1   6   7 1459.78 30.6851   1
  -1   6   7 1614.71 26.0809   2
   1  -6  -7 1620.75 43.4823   1
  -1   6   6 1.23096 4.73812   1
   1  -6  -6 0.41442 8.70969   1
  -1   6   6 1.63451 3.71528   2
   1  -6  -5 116.487 14.1939   1
  -1   6   5 97.5234 7.27651   2
  -1   6   5 99.4826 9.31265   1
  -1   6   4 45.3278 7.04354   1
  -1   6   4 35.3713 5.18037   2
   1  -6  -4 29.2760 10.6403   1
   1  -6  -3 46.1237 10.4909   1
  -1   6   3 44.5633 5.70874   2
  -1   6   3 48.6213 7.07137   1
  -1   6   2 22.8006 4.65727   2
   1  -6  -2 20.2692 8.65200   1
  -1   6   2 21.1869 5.72000   1
  -1   6   1 3012.30 41.9040   1
   1  -6  -1 2925.71 54.8514   1
  -1   6   1 3042.83 37.5160   2
  -1   6   0 295.127 13.9573   1
  -1   6   0 267.096 12.1769   2
   1  -6   0 257.081 17.5468   1
  -1   6  -1 275.967 12.5612   2
  -1   6  -1 258.203 13.0206   1
   1  -6   1 265.257 17.7274   1
  -1   6  -2 717.015 20.3780   2
   1  -6   2 734.000 27.9279   1
  -1   6  -2 691.887 20.4473   1
  -1   6  -3 15.7086 5.32528   1
   1  -6   3 14.4179 8.51144   1
  -1   6  -3 10.4484 4.98807   2
   1  -6   4 117.532 13.2561   1
  -1   6  -4 115.557 9.15253   1
  -1   6  -4 95.1864 9.00986   2
  -1   6  -5 1179.30 28.7632   2
   1  -6   5 1266.71 37.4152   1
  -1   6  -5 1210.33 26.2103   1
  -1   6  -5 1213.22 25.2754   2
  -1   6  -6 106.471 10.4034   2
  -1   6  -6 122.401 9.44062   1
  -1   6  -7 47.7890 6.83227   1
  -1   6  -7 74.0144 9.62997   2
  -1   6  -8 21.8433 7.28527   2
  -1   6  -8 33.8785 5.99427   1
   1  -6   9 2.64391 9.19489   1
  -1   6  -9 4.30587 6.72685   2
  -1   6  -9-0.49911 4.44990   1
   1  -6  10 470.082 26.7431   1
  -1   6 -10 421.766 13.2047   1
  -1   6 -10 419.933 21.1778   2
   1  -6  11 3647.23 72.2334   1
  -1   6 -11 3678.97 61.8585   2
  -1   6 -12 373.282 21.5787   2
   1  -6  12 358.932 24.6612   1
  -1   6 -13 1.84889 8.92785   2
   1  -6  13-1.41745 10.7519   1
  -1   6 -14 200.255 17.9849   2
   1  -6  14 160.835 20.4460   1
  -1   6 -15 306.583 22.1699   2
  -1   6 -16 12.1664 10.6461   2
  -1   6 -17 16.7525 12.2714   2
  -1   6 -18 9.06966 11.2574   2
  -1   6 -19 17.0289 11.8421   2
  -1   6 -20 729.386 37.1381   2
  -1   6 -21 120.208 18.5915   2
  -1   6 -22 73.2557 16.6651   2
   1  -5 -27 150.256 26.0023   2
   1  -5 -26 499.946 36.8886   2
   1  -5 -25 53.8780 17.0263   2
   1  -5 -24 34.8028 15.6510   2
   1  -5 -23 139.899 21.5069   2
   1  -5 -22 32.6907 15.3306   2
   1  -5 -21 56.0712 14.6584   2
   1  -5 -21 51.1725 13.6909   3
  -1   5  20 714.511 32.7427   1
   1  -5 -20 682.530 33.6997   3
   1  -5 -20 715.690 35.9106   2
   1  -5 -19 19.3371 11.8337   3
   1  -5 -19 38.2698 13.4966   2
  -1   5  19 42.1654 11.6941   1
  -1   5  18 6.77269 9.32572   1
   1  -5 -18 0.97604 10.1897   2
   1  -5 -18 6.41541 10.3277   3
   1  -5 -17 90.4828 13.9875   2
   1  -5 -17 107.536 14.5854   3
  -1   5  17 83.3418 12.2085   1
   1  -5 -16 244.127 18.9775   3
  -1   5  16 231.416 16.6619   1
   1  -5 -16 196.194 9.75994   1
   1  -5 -15 83.5933 8.56475   1
   1  -5 -15 74.2133 11.9104   3
  -1   5  15 90.6747 11.0058   1
   1  -5 -14 1753.09 42.2015   3
   1  -5 -14 1666.86 34.3865   1
  -1   5  14 1755.82 38.9959   1
  -1   5  13 12.3974 6.79130   1
   1  -5 -13 0.75766 6.83713   1
   1  -5 -13 1.11689 6.99126   3
  -1   5  12 5.58073 5.50752   1
   1  -5 -12 22.0362 8.24842   3
   1  -5 -12 12.7128 8.03691   1
  -1   5  11 2530.68 42.0860   1
   1  -5 -11 2545.33 48.7749   1
   1  -5 -11 2665.39 47.0950   3
  -1   5  10 97.7201 9.47748   1
   1  -5 -10 84.0533 11.5962   1
   1  -5  -9 91.1302 12.3356   1
   1  -5  -9 103.392 7.95422   2
  -1   5   9 112.233 9.36210   1
  -1   5   9 104.168 6.88314   2
  -1   5   8 1.70920 3.23044   2
   1  -5  -8-4.86740 8.53587   1
  -1   5   8 4.18168 4.84739   1
  -1   5   7 71.2254 7.69332   1
   1  -5  -7 55.1432 10.0581   1
  -1   5   7 70.1805 5.85487   2
  -1   5   6 24.1823 5.34371   1
   1  -5  -6 21.2962 9.25706   1
  -1   5   6 7.86842 3.60730   2
  -1   5   5 6942.50 49.5530   2
  -1   5   5 7111.06 59.8114   1
   1  -5  -5 7112.25 81.5445   1
  -1   5   4 63.4397 5.58185   2
   1  -5  -4 95.1173 12.0864   1
  -1   5   4 67.8483 7.14219   1
  -1   5   3 33.3970 4.54213   2
  -1   5   3 30.1191 5.93800   1
   1  -5  -3 50.5209 10.5038   1
  -1   5   2 155.132 8.04261   2
  -1   5   2 152.405 9.71151   1
   1  -5  -2 173.525 13.8069   1
  -1   5   1 13.4565 3.97617   2
  -1   5   1 14.2478 5.25403   1
   1  -5  -1 19.5883 7.41952   1
  -1   5   0 203.254 10.7763   1
   1  -5   0 219.522 14.7569   1
  -1   5   0 218.948 10.0516   2
  -1   5  -1 1192.02 24.0209   1
  -1   5  -1 1212.62 23.1254   2
   1  -5   1 1130.75 30.6870   1
   1  -5   2 11.2578 7.08547   1
  -1   5  -2 5.94992 4.63451   1
  -1   5  -2 16.0332 4.65851   2
  -1   5  -3 5.93116 4.46574   1
  -1   5  -3 2.85183 4.54145   2
   1  -5   3 11.4714 7.17139   1
   1  -5   4 619.912 23.4613   1
  -1   5  -4 694.591 18.4177   1
  -1   5  -4 626.154 19.3653   2
  -1   5  -5 42.5551 7.40851   2
   1  -5   5 52.9618 9.12100   1
  -1   5  -5 65.2658 6.96408   1
   1  -5   6 405.105 20.1433   1
  -1   5  -6 402.216 16.6337   2
  -1   5  -6 392.374 13.8007   1
  -1   5  -7 2819.19 34.6125   1
   1  -5   7 2791.29 51.3579   1
  -1   5  -7 2851.81 44.4823   2
   1  -5   8 37.3957 9.40822   1
  -1   5  -8 32.6583 6.02305   2
  -1   5  -8 31.5119 5.11903   1
  -1   5  -8 41.1277 8.16550   2
  -1   5  -9 5.92403 6.17559   2
  -1   5  -9 17.9112 4.15701   1
   1  -5   9 19.6967 8.12200   1
   1  -5  10 1112.14 36.0917   1
  -1   5 -10 1049.62 16.8841   1
  -1   5 -10 1176.64 32.7463   2
   1  -5  11 406.525 23.3413   1
  -1   5 -11 434.733 21.4088   2
   1  -5  12 129.112 15.2865   1
  -1   5 -12 124.912 13.4615   2
  -1   5 -13 42.8744 10.4238   2
   1  -5  13 62.8304 12.7235   1
   1  -5  14 20.6175 10.3808   1
  -1   5 -14 2.85966 9.17400   2
  -1   5 -15 254.523 19.9458   2
  -1   5 -16 1812.60 49.3445   2
  -1   5 -17 168.772 17.8105   2
  -1   5 -18 22.4282 11.6029   2
  -1   5 -19 0.11643 12.1017   2
  -1   5 -20 268.960 23.8473   2
  -1   5 -21 9.85448 13.3604   2
  -1   5 -22-9.99585 13.0982   2
  -1   5 -23 84.1903 18.0490   2
   1  -4 -27 352.976 32.8778   2
   1  -4 -26 13.7466 16.0894   2
   1  -4 -25 29.5651 16.1128   2
   1  -4 -24 253.634 26.1487   2
   1  -4 -23 33.9737 16.1547   2
   1  -4 -22 2.74638 12.4493   2
   1  -4 -21 361.170 27.6719   2
   1  -4 -20 162.421 19.7867   2
   1  -4 -20 138.957 17.6012   3
   1  -4 -19 142.661 17.7452   2
  -1   4  19 157.054 16.7306   1
   1  -4 -19 146.665 17.3511   3
  -1   4  18 290.276 20.2412   1
   1  -4 -18 300.150 22.7863   2
   1  -4 -18 223.020 19.0271   3
   1  -4 -17 35.2598 11.6674   3
  -1   4  17 18.0385 8.98978   1
   1  -4 -17 0.68771 9.49679   2
   1  -4 -16 3.20282 8.17070   3
  -1   4  16 5.70889 7.58436   1
   1  -4 -16-0.63747 8.87376   2
   1  -4 -15 2928.40 57.1930   2
   1  -4 -15 2723.84 32.6292   1
   1  -4 -15 2901.99 54.9344   3
  -1   4  15 3010.58 52.2584   1
   1  -4 -14 2.05539 8.39066   3
   1  -4 -14 11.8937 5.58867   1
  -1   4  14 8.61511 6.65035   1
   1  -4 -13 115.003 8.36138   2
   1  -4 -13 88.6151 11.2177   3
  -1   4  13 89.0629 10.0787   1
   1  -4 -13 85.0154 8.90645   1
   1  -4 -12 28.7242 6.55494   1
  -1   4  12 31.7548 6.83649   1
   1  -4 -12 37.8093 8.26156   3
   1  -4 -12 39.2260 5.76482   2
  -1   4  11 116.465 9.93230   1
   1  -4 -11 114.436 10.6614   3
   1  -4 -11 136.578 11.8152   1
  -1   4  10 31.3682 6.47238   1
   1  -4 -10 24.4150 7.26097   3
   1  -4 -10 37.0572 8.63999   1
  -1   4   9 3964.52 46.7804   1
   1  -4  -9 3955.82 56.8438   1
   1  -4  -8 43.3420 9.12169   1
  -1   4   8 43.0658 6.44952   1
  -1   4   8 35.8362 4.55845   2
  -1   4   7 11.9029 3.38440   2
  -1   4   7 23.2483 5.13842   1
   1  -4  -7 10.5951 3.91928   2
   1  -4  -7 15.6148 8.16924   1
  -1   4   6 2581.07 27.5434   2
   1  -4  -6 2494.40 45.5540   1
  -1   4   6 2388.02 33.0537   1
  -1   4   5 0.10901 2.87041   2
   1  -4  -5-0.52454 7.06963   1
  -1   4   5 3.03279 3.98891   1
  -1   4   4 21.3168 4.97970   1
  -1   4   4 24.2351 3.97457   2
   1  -4  -4 12.5525 7.66000   1
   1  -4  -3 204.237 14.0075   1
  -1   4   3 190.483 7.76475   2
  -1   4   3 203.623 9.93984   1
  -1   4   2-1.89929 4.36277   1
  -1   4   2 1.24335 3.04494   2
   1  -4  -2-2.29671 6.95001   1
  -1   4   1 24.8575 4.08600   2
   1  -4  -1 22.3488 7.47592   1
  -1   4   1 18.3374 4.76741   1
  -1   4   0 1121.59 20.9276   1
  -1   4   0 1076.48 18.7126   2
   1  -4   0 1064.96 26.7495   1
   1  -4   1 49.2052 7.56637   1
  -1   4  -1 46.5130 5.18526   2
  -1   4  -1 40.7709 5.51072   1
  -1   4  -2 49.0685 5.67307   2
  -1   4  -2 55.2766 5.98532   1
   1  -4   2 69.8771 8.51855   1
  -1   4  -3 1060.59 20.1117   1
  -1   4  -3 1061.46 21.5319   2
   1  -4   3 1118.09 26.9520   1
  -1   4  -4 5.66184 3.84806   1
   1  -4   4 8.77874 6.06939   1
  -1   4  -4-2.18274 3.98639   2
  -1   4  -5 55.9374 5.68554   1
   1  -4   5 79.1262 8.82879   1
  -1   4  -5 71.6285 7.19199   2
   1  -4   6 1411.87 32.1137   1
  -1   4  -6 1387.07 22.6873   2
  -1   4  -6 1382.55 28.1794   2
  -1   4  -6 1409.80 22.2334   1
  -1   4  -7 174.682 8.97949   2
  -1   4  -7 178.038 8.15274   1
   1  -4   7 210.181 13.7735   1
  -1   4  -7 192.780 11.8675   2
  -1   4  -8 53.2118 5.04766   1
   1  -4   8 37.7567 7.96386   1
  -1   4  -8 39.4841 7.64604   2
  -1   4  -8 40.9625 5.67377   2
   1  -4   9 11.6393 6.92019   1
  -1   4  -9 6.99727 2.88922   1
  -1   4  -9 2.56580 3.95606   2
  -1   4  -9 8.21769 3.40173   1
  -1   4 -10 5.86748 1.84404   1
  -1   4 -10 5.64045 4.54052   2
  -1   4 -10 4.80526 6.22733   2
   1  -4  10 7.81907 7.39520   1
   1  -4  11 314.042 18.9696   1
  -1   4 -11 370.102 19.0149   2
   1  -4  12 4039.67 65.9386   1
  -1   4 -12 4264.46 63.3438   2
   1  -4  13 228.053 18.0131   1
  -1   4 -13 208.362 16.1354   2
  -1   4 -14 14.8275 9.57856   2
   1  -4  14 19.2118 9.36508   1
  -1   4 -15 759.801 30.8933   2
   1  -4  15 743.326 32.6637   1
  -1   4 -16 491.689 26.4941   2
  -1   4 -17 64.5947 13.7859   2
  -1   4 -18 1.37449 10.1559   2
  -1   4 -19 11.8846 11.3766   2
  -1   4 -20 22.4631 13.6361   2
  -1   4 -21 725.141 36.3155   2
  -1   4 -22 75.1436 17.1666   2
  -1   4 -23 164.714 21.8042   2
  -1   4 -24 149.083 21.6620   2
   1  -3 -27 78.5513 20.9343   2
   1  -3 -26 196.198 26.2978   2
   1  -3 -25 274.754 28.2405   2
   1  -3 -24 47.0228 15.4486   2
   1  -3 -23 43.4388 15.8245   2
   1  -3 -22 87.9807 17.0369   2
   1  -3 -21 62.9742 15.7741   2
   1  -3 -20 7.32424 11.8175   2
  -1   3  19 1188.11 40.2579   1
   1  -3 -19 1229.26 44.3787   2
   1  -3 -19 1187.63 40.3577   3
  -1   3  18 4.72452 8.42952   1
   1  -3 -18-4.15785 10.1409   2
   1  -3 -18-5.68284 10.2883   3
   1  -3 -17 39.7831 10.6152   2
   1  -3 -17 43.3595 11.2485   3
  -1   3  17 44.5742 10.0299   1
   1  -3 -16 33.8334 9.47964   3
   1  -3 -16 31.1135 9.78753   2
  -1   3  16 21.2871 8.65583   1
   1  -3 -15 264.460 18.5236   2
   1  -3 -15 282.765 18.4262   3
  -1   3  15 273.620 16.7114   1
   1  -3 -15 253.629 7.97018   1
   1  -3 -14 356.960 19.2755   3
   1  -3 -14 299.798 11.3594   1
  -1   3  14 291.823 16.5844   1
   1  -3 -14 318.514 19.6749   2
   1  -3 -13 3116.27 53.8488   2
   1  -3 -13 3058.97 50.8313   3
   1  -3 -13 3041.07 38.7527   2
   1  -3 -13 3141.10 38.4395   1
  -1   3  13 2982.93 47.5235   1
   1  -3 -12 12.8314 4.35815   2
   1  -3 -12 9.57226 5.00653   1
   1  -3 -12 6.35438 6.64483   3
  -1   3  12 18.7717 6.17023   1
  -1   3  11 11.6817 5.59488   1
   1  -3 -11 5.26359 3.56496   2
   1  -3 -11 8.34519 5.77448   1
   1  -3 -11 9.71810 6.31027   3
   1  -3 -10 4260.97 51.4685   1
   1  -3 -10 4306.88 51.6879   3
  -1   3   9 31.7457 6.19911   1
   1  -3  -9 55.7833 7.39247   3
   1  -3  -9 39.2228 7.85501   1
   1  -3  -8 81.6521 9.89256   1
  -1   3   8 87.3269 7.60392   1
  -1   3   7 105.497 7.75867   1
  -1   3   7 93.5260 6.02646   2
   1  -3  -7 118.084 10.7291   1
  -1   3   6 57.0567 4.89727   2
  -1   3   6 66.6700 6.27161   1
   1  -3  -6 67.4601 9.80040   1
   1  -3  -6 50.3813 4.92721   2
  -1   3   5 35.2849 4.04577   2
   1  -3  -5 32.7670 4.28276   2
  -1   3   5 46.3066 5.44152   1
   1  -3  -5 32.4797 8.13887   1
   1  -3  -4 2922.74 42.9805   1
  -1   3   4 2840.35 30.9673   1
  -1   3   4 2814.43 25.6747   2
  -1   3   3 69.9026 5.85606   1
   1  -3  -3 60.1954 9.30846   1
  -1   3   3 73.4960 4.72634   2
  -1   3   2 8.41782 2.92331   2
  -1   3   2 4.78056 3.86291   1
   1  -3  -2-1.62487 6.36480   1
   1  -3  -1 9.89749 6.21874   1
  -1   3   1 8.29455 3.82638   1
  -1   3   1 5.45798 2.92446   2
  -1   3   0 1.44938 3.82754   1
   1  -3   0-0.38650 5.48742   1
  -1   3   0 8.10874 3.12944   2
  -1   3  -1 9.98164 3.60007   1
  -1   3  -1 9.03375 3.20468   2
   1  -3   1 7.37235 5.28140   1
   1  -3   2 191.038 10.6357   1
  -1   3  -2 185.529 7.79495   1
  -1   3  -2 220.847 8.52662   2
   1  -3   3-4.21452 4.65336   1
  -1   3  -3 3.31178 3.65112   2
  -1   3  -3-2.20166 3.09250   1
  -1   3  -4 1.58891 3.57471   2
  -1   3  -4 0.47382 3.01655   1
   1  -3   4-2.51689 4.60621   1
  -1   3  -5 530.949 11.8922   1
  -1   3  -5 525.146 12.1011   2
   1  -3   5 573.273 17.5041   1
  -1   3  -5 498.253 15.1854   2
   1  -3   6-2.89457 4.86300   1
  -1   3  -6 0.50392 2.83066   2
  -1   3  -6-2.12260 2.73384   1
  -1   3  -6 3.58458 4.39172   2
  -1   3  -7 199.445 11.1819   2
   1  -3   7 196.987 11.6262   1
  -1   3  -7 205.103 8.94422   2
  -1   3  -7 208.172 7.03634   1
  -1   3  -8 2765.47 32.8361   2
  -1   3  -8 2816.52 40.5211   2
  -1   3  -8 2786.13 21.1277   1
   1  -3   8 2734.06 41.5199   1
   1  -3   9 4.73333 6.54793   1
  -1   3  -9 5.22655 3.66019   2
  -1   3  -9 6.94192 6.35953   2
  -1   3 -10 22.3872 6.87881   2
   1  -3  10 39.9864 7.72003   1
  -1   3 -10 42.6203 5.69919   2
   1  -3  11 1368.82 34.1877   1
  -1   3 -11 1322.50 25.8786   2
  -1   3 -11 1378.68 33.0825   2
  -1   3 -12 454.672 16.1905   2
   1  -3  12 428.951 20.6182   1
  -1   3 -12 456.293 20.5534   2
  -1   3 -13 48.9469 9.86933   2
   1  -3  13 36.7633 9.57481   1
   1  -3  14 9.16663 8.09328   1
  -1   3 -14 2.52057 7.37817   2
  -1   3 -15 44.8588 10.7149   2
   1  -3  15 55.3340 10.8248   1
  -1   3 -16 33.5114 10.1124   2
  -1   3 -17 2107.33 51.7035   2
  -1   3 -18 161.218 17.9181   2
  -1   3 -19 28.8800 11.7632   2
  -1   3 -20-7.26098 11.4865   2
  -1   3 -21 156.950 19.9138   2
  -1   3 -22-9.37949 14.1901   2
  -1   3 -23 41.4757 14.4285   2
  -1   3 -24 72.6432 17.2016   2
   1  -2 -27-9.40699 15.6715   2
   1  -2 -26 350.553 31.4121   2
   1  -2 -25 33.6185 15.8313   2
   1  -2 -24 13.2409 14.5907   2
   1  -2 -23 288.038 26.6083   2
   1  -2 -22 6.38917 12.6192   2
   1  -2 -21 6.89899 11.7079   2
   1  -2 -20 86.7857 15.1364   2
   1  -2 -19 132.541 15.8737   3
   1  -2 -19 153.818 18.7693   2
  -1   2  19 139.883 16.3404   1
   1  -2 -18 301.582 22.5708   2
  -1   2  18 315.689 21.5073   1
   1  -2 -17 496.394 24.8146   3
  -1   2  17 591.262 26.6613   1
   1  -2 -17 539.415 28.2375   2
  -1   2  16 5.55074 7.63510   1
   1  -2 -16 4.59296 7.94095   3
   1  -2 -16-1.83723 8.78692   2
  -1   2  15-3.71502 7.16747   1
   1  -2 -15 9.88820 7.54117   3
   1  -2 -15 4.84108 9.00939   2
   1  -2 -14 4893.53 35.9682   1
   1  -2 -14 4991.81 72.3415   2
  -1   2  14 4993.54 64.8606   1
   1  -2 -14 5020.18 66.0252   3
   1  -2 -13 197.142 9.52739   1
   1  -2 -13 214.808 15.6985   2
  -1   2  13 214.469 13.9118   1
   1  -2 -13 179.019 13.3490   3
   1  -2 -13 231.662 11.3073   2
   1  -2 -12 46.9228 8.55858   3
   1  -2 -12 50.0866 8.99927   2
   1  -2 -12 44.4710 6.10120   1
   1  -2 -12 58.3294 6.20021   2
  -1   2  12 47.5804 7.55089   1
   1  -2 -11 4.05551 3.47376   2
   1  -2 -11-2.65034 5.49507   3
   1  -2 -11-0.29122 6.24809   2
   1  -2 -11 4.89191 5.07690   1
  -1   2  11 7.51526 4.71068   1
   1  -2 -10 162.039 10.7903   3
   1  -2 -10 175.781 8.62121   2
   1  -2 -10 181.008 10.8309   1
  -1   2  10 181.564 10.7555   1
   1  -2 -10 149.845 11.6099   2
  -1   2   9 175.921 10.2341   1
   1  -2  -9 199.437 11.3857   1
   1  -2  -9 164.568 10.1886   3
   1  -2  -9 185.114 8.40065   2
   1  -2  -8 5408.14 48.6123   3
   1  -2  -8 5278.09 52.9949   1
  -1   2   8 5262.72 48.1461   1
   1  -2  -7 59.3010 6.48276   3
   1  -2  -7 68.9643 8.41319   1
  -1   2   7 61.4057 6.44358   1
  -1   2   7 40.6795 4.17846   2
   1  -2  -6 17.8760 6.80952   1
  -1   2   6 26.6370 4.93436   1
  -1   2   6 22.8619 3.28640   2
  -1   2   5 4058.89 29.2280   2
   1  -2  -5 4006.16 46.3959   1
  -1   2   5 3991.77 35.4384   1
  -1   2   4 3.65725 2.52268   2
  -1   2   4 1.10759 3.48508   1
   1  -2  -4-0.56163 6.37768   1
   1  -2  -4 3.44479 2.77457   2
  -1   2   3 53.5246 3.71927   2
  -1   2   3 53.0934 4.82076   1
   1  -2  -3 65.3242 8.19999   1
   1  -2  -2 1495.48 25.3441   1
  -1   2   2 1492.47 15.5744   2
  -1   2   2 1490.17 18.4918   1
  -1   2   1-0.61922 2.92043   1
   1  -2  -1 7.92137 5.12677   1
  -1   2   1 2.17294 2.03691   2
  -1   2   0 5.10579 2.29026   2
  -1   2   0-1.23150 2.57306   1
   1  -2   0 0.21510 4.73149   1
  -1   2  -1 1790.43 18.4480   2
   1  -2   1 1907.06 23.7734   1
  -1   2  -1 1968.02 18.9628   1
   1  -2   2 31.4862 4.78195   1
  -1   2  -2 43.9449 4.24199   2
  -1   2  -2 42.5671 3.71469   1
  -1   2  -3 100.654 6.00455   2
  -1   2  -3 116.771 4.98963   1
   1  -2   3 121.968 6.82398   1
  -1   2  -4 974.781 12.4032   1
  -1   2  -4 968.572 14.2116   1
   1  -2   4 973.404 17.6756   1
  -1   2  -4 975.745 17.1617   2
  -1   2  -5 0.01278 2.43788   1
   1  -2   5 5.31780 3.80957   1
  -1   2  -5 0.05148 1.92039   1
  -1   2  -5-1.31087 2.23154   2
  -1   2  -5-0.42339 3.38938   2
  -1   2  -6 53.3814 4.08349   2
   1  -2   6 52.5496 5.92375   1
  -1   2  -6 50.4060 2.83580   1
  -1   2  -6 41.4353 5.32276   2
  -1   2  -7 4013.55 33.5026   2
  -1   2  -7 4085.98 42.4349   2
   1  -2   7 4096.03 41.7575   1
  -1   2  -8 128.157 9.14950   2
   1  -2   8 132.963 9.08387   1
  -1   2  -8 142.350 7.38082   2
  -1   2  -9 170.340 8.31531   2
   1  -2   9 155.213 10.2542   1
  -1   2  -9 141.125 10.2032   2
  -1   2 -10 40.9718 7.03674   2
   1  -2  10 41.9377 7.27368   1
  -1   2 -10 33.9976 4.84728   2
  -1   2 -11 40.3581 7.52646   2
  -1   2 -11 35.9439 5.45481   2
   1  -2  11 38.5642 7.48229   1
  -1   2 -12 94.9106 9.97332   2
  -1   2 -12 93.5959 7.61932   2
   1  -2  12 101.933 10.4133   1
   1  -2  13 2645.53 47.1512   1
  -1   2 -13 2746.97 37.5961   2
  -1   2 -13 2579.76 46.5532   2
   1  -2  14 71.0129 10.4991   1
  -1   2 -14 65.0859 10.2373   2
  -1   2 -15 2.22398 7.69587   2
   1  -2  15-0.59941 7.20943   1
  -1   2 -16 426.135 23.0966   2
  -1   2 -17 451.509 24.5736   2
  -1   2 -18 50.8679 11.7284   2
  -1   2 -19 2.91996 10.2629   2
  -1   2 -20 6.47532 10.4677   2
  -1   2 -21-2.49087 10.5542   2
  -1   2 -22 637.807 34.4172   2
  -1   2 -23-6.99860 12.7922   2
  -1   2 -24 114.578 18.6908   2
  -1   2 -25 207.150 23.5565   2
   1  -1 -26 138.161 23.0085   2
   1  -1 -25 212.450 25.5814   2
   1  -1 -24 156.164 21.6714   2
   1  -1 -23 32.6037 15.1409   2
   1  -1 -22 57.4203 15.4024   2
   1  -1 -21 23.6113 13.1280   2
   1  -1 -20 71.2297 15.4899   2
  -1   1  19 10.1104 10.8611   1
   1  -1 -19 13.8461 11.6303   2
   1  -1 -18 1733.48 50.0096   2
  -1   1  18 1750.85 47.6695   1
   1  -1 -18 1652.95 46.6565   3
   1  -1 -17 80.4511 12.4698   3
   1  -1 -17 93.3046 13.9858   2
  -1   1  17 46.9827 10.8970   1
   1  -1 -16 11.1103 8.72031   3
  -1   1  16 8.35602 8.32235   1
   1  -1 -16-0.63595 8.78798   2
   1  -1 -15 20.5637 9.71583   2
   1  -1 -15 15.1714 8.36054   3
  -1   1  15 16.6425 7.76775   1
   1  -1 -14 179.033 15.4712   2
  -1   1  14 213.219 15.2879   1
   1  -1 -14 186.622 14.3901   3
   1  -1 -14 172.554 6.21448   1
   1  -1 -13 319.359 18.6727   2
   1  -1 -13 330.367 17.2260   3
   1  -1 -13 313.873 10.3932   1
  -1   1  13 328.395 17.3381   1
   1  -1 -13 363.638 13.9353   2
  -1   1  12 1548.61 33.7052   1
   1  -1 -12 1749.29 28.3579   2
   1  -1 -12 1557.86 37.8072   2
   1  -1 -12 1597.12 33.9059   3
   1  -1 -12 1649.52 25.1028   1
   1  -1 -11-1.15405 3.34041   2
   1  -1 -11-1.82718 5.28829   3
   1  -1 -11 1.59253 3.95002   1
   1  -1 -11 0.17874 6.39373   2
  -1   1  11-2.22196 5.54941   1
   1  -1 -10 16.3694 5.18860   1
   1  -1 -10 17.3952 4.10354   2
   1  -1 -10 14.6213 6.63594   2
   1  -1 -10 15.4950 5.46156   3
  -1   1  10 9.48696 5.34417   1
  -1   1   9 7077.82 60.6916   1
   1  -1  -9 7351.02 57.2086   1
   1  -1  -9 7378.26 68.2314   2
   1  -1  -9 7228.88 59.7709   3
   1  -1  -9 7046.89 48.7086   2
   1  -1  -8 66.0435 5.17843   2
   1  -1  -8 42.5141 7.59164   2
   1  -1  -8 57.4672 6.39052   3
  -1   1   8 58.8975 6.72670   1
   1  -1  -8 49.2109 6.46691   1
   1  -1  -7 184.108 10.4957   1
   1  -1  -7 193.413 9.07743   3
  -1   1   7 189.791 9.65186   1
   1  -1  -7 180.260 10.6037   2
   1  -1  -6 403.662 14.1748   1
   1  -1  -6 416.687 11.4945   3
  -1   1   6 416.130 12.5958   1
  -1   1   6 374.313 9.63499   2
   1  -1  -6 399.357 13.8403   2
  -1   1   5 60.8538 5.57221   1
   1  -1  -5 74.4062 7.53901   1
   1  -1  -5 50.1068 4.53536   3
  -1   1   5 51.1962 4.10816   2
   1  -1  -4 24.2783 5.93958   1
  -1   1   4 16.5824 2.69374   2
  -1   1   4 22.5271 3.88335   1
  -1   1   3 5623.09 28.4628   2
   1  -1  -3 5652.47 28.2898   2
  -1   1   3 5816.86 35.2314   1
   1  -1  -3 5682.28 46.0688   1
   1  -1  -2 12.9944 2.20532   2
  -1   1   2 15.8781 2.86473   1
   1  -1  -2 29.9981 5.27179   1
  -1   1   2 19.0958 2.15362   2
  -1   1   1 3.64881 1.36689   2
   1  -1  -1 0.01917 3.55925   1
  -1   1   1 0.24205 2.05346   1
  -1   1   0 33.4740 2.70789   1
   1  -1   0 37.5659 3.86266   1
  -1   1   0 29.8387 1.91823   2
   1  -1   1 1.31140 2.08429   1
  -1   1  -1 1.88002 2.19829   1
  -1   1  -1-0.68740 1.57696   1
  -1   1  -1-1.15973 1.48803   2
  -1   1  -2 9.62337 2.14941   2
   1  -1   2 10.3722 2.20020   1
  -1   1  -3 7208.12 33.2069   2
   1  -1   3 7405.79 30.7748   1
  -1   1  -4 31.5090 3.68672   2
  -1   1  -4 27.6124 6.46388   3
   1  -1   4 32.9059 3.33207   1
   1  -1   5 13.8541 3.15698   1
  -1   1  -5 10.7036 5.79368   3
  -1   1  -5 15.4466 2.25385   2
  -1   1  -5 13.3040 3.46213   2
   1  -1   6 277.590 8.83949   1
  -1   1  -6 290.887 9.94282   2
  -1   1  -6 269.898 7.31716   2
  -1   1  -6 292.132 14.2780   3
  -1   1  -7 47.1602 8.37729   3
   1  -1   7 36.0120 4.68082   1
  -1   1  -7 41.7569 3.81288   2
  -1   1  -7 40.1749 5.45691   2
   1  -1   8 162.812 8.34656   1
  -1   1  -8 147.302 6.55233   2
  -1   1  -8 147.709 12.0792   3
  -1   1  -8 129.818 8.62823   2
  -1   1  -9 3935.50 33.6781   2
  -1   1  -9 3834.02 56.7513   3
   1  -1   9 4035.26 41.7778   1
  -1   1  -9 3935.81 44.4934   2
  -1   1 -10 51.7644 10.0290   3
  -1   1 -10 56.2449 7.11814   2
   1  -1  10 53.4117 6.56729   1
  -1   1 -10 52.8770 5.34904   2
  -1   1 -11 0.07391 7.77260   3
  -1   1 -11 5.54184 3.41299   2
  -1   1 -11 2.28628 5.95361   2
   1  -1  11 0.12947 4.64454   1
   1  -1  12 1058.43 26.8202   1
  -1   1 -12 914.779 26.2428   2
  -1   1 -12 1011.51 34.0855   3
  -1   1 -12 1034.18 20.7392   2
  -1   1 -13 192.717 10.0720   2
  -1   1 -13 259.210 19.4115   3
  -1   1 -13 212.938 14.2399   2
   1  -1  13 224.922 14.2176   1
   1  -1  14 39.9349 8.38846   1
  -1   1 -14 32.2105 8.96689   2
  -1   1 -14 39.3444 6.25798   2
  -1   1 -15 16.3222 8.46279   2
   1  -1  15 17.0011 7.85437   1
  -1   1 -16 39.0647 9.94855   2
  -1   1 -17 66.3667 12.1269   2
  -1   1 -18 1421.47 41.9597   2
  -1   1 -19 27.7124 11.4366   2
  -1   1 -20 39.9174 11.5042   2
  -1   1 -21-11.7233 11.7887   2
  -1   1 -22 141.555 18.7459   2
  -1   1 -23 1.35859 10.6300   2
  -1   1 -24 238.302 22.9697   2
  -1   1 -25 254.408 24.3091   2
   1   0 -26-4.26257 14.7679   2
   1   0 -25 402.732 31.5511   2
   1   0 -24 54.6561 16.4848   2
   1   0 -23 16.6261 12.7246   2
   1   0 -22 539.133 34.0403   2
   1   0 -21 2.97047 12.2044   2
   1   0 -20 24.9110 12.9090   2
   1   0 -19-10.7727 11.7416   2
  -1   0  18 76.0998 13.7388   1
   1   0 -18 83.2705 14.6077   2
  -1   0  17 368.943 23.1645   1
   1   0 -17 383.984 24.3538   2
   1   0 -16 249.651 19.4396   2
   1   0 -16 259.694 18.8104   3
  -1   0  16 247.232 18.6300   1
   1   0 -15 12.9610 8.84569   3
  -1   0  15 26.0593 9.49478   1
   1   0 -15 6.32196 8.57962   2
  -1   0  14 27.2409 8.63903   1
   1   0 -14 29.7208 3.05182   1
   1   0 -14 24.7023 9.90419   2
   1   0 -14 38.0646 9.69010   3
   1   0 -13 3792.05 32.9095   1
   1   0 -13 3639.07 59.5841   2
   1   0 -13 3971.48 45.3235   2
  -1   0  13 3896.51 58.2697   1
   1   0 -13 3803.37 56.6256   3
   1   0 -12 128.058 11.5839   3
   1   0 -12 127.250 12.6820   2
   1   0 -12 111.664 8.34808   2
  -1   0  12 116.363 11.4401   1
   1   0 -12 112.326 7.42921   1
   1   0 -11 19.0807 6.42830   3
  -1   0  11 19.5478 6.54144   1
   1   0 -11 25.9539 7.25151   2
   1   0 -11 24.0564 4.89396   1
   1   0 -11 28.8815 4.67870   2
   1   0 -10 70.2773 9.08696   2
   1   0 -10 72.4174 6.32750   2
   1   0 -10 83.7282 6.96104   1
   1   0 -10 63.4195 8.05204   3
  -1   0  10 84.9432 8.83149   1
   1   0  -9 195.279 11.0236   3
  -1   0   9 194.544 11.5172   1
   1   0  -9 205.950 10.1925   1
   1   0  -9 164.016 11.8507   2
   1   0  -9 210.022 9.05284   2
   1   0  -8 365.729 10.9979   2
  -1   0   8 318.773 13.3960   1
   1   0  -8 339.719 15.1456   2
   1   0  -8 354.636 12.7891   1
   1   0  -8 346.534 12.9538   3
  -1   0   7 10492.6 68.1655   1
   1   0  -7 10430.4 61.0114   3
   1   0  -7 10437.1 73.6494   2
   1   0  -7 10503.6 65.1311   1
   1   0  -6 8.71340 3.81301   3
  -1   0   6 3.66701 4.21805   1
  -1   0   6 0.29826 2.46999   2
   1   0  -6 4.50544 5.19214   2
   1   0  -6 5.96139 5.23967   1
   1   0  -5 21.8466 5.83168   2
   1   0  -5 20.4780 3.80312   3
  -1   0   5 16.6500 4.35820   1
  -1   0   5 21.8330 3.30758   2
   1   0  -5 23.9934 5.46615   1
   1   0  -4 2477.04 19.9831   3
  -1   0   4 2507.84 20.9619   2
  -1   0   4 2401.00 26.4157   1
   1   0  -4 2588.07 29.9101   1
   1   0  -4 2441.41 29.2326   2
   1   0  -3 73.4199 6.07664   1
  -1   0   3 66.0247 4.88636   1
   1   0  -3 52.6945 5.51390   2
  -1   0   3 67.9234 3.64557   2
  -1   0   2 0.58825 2.68434   1
   1   0  -2 1.11117 2.84622   2
   1   0  -2 3.75850 3.73637   1
   1   0  -2 0.54288 1.65443   2
  -1   0   2 0.40366 1.67600   2
   1   0  -1 1839.12 12.6015   2
   1   0  -1 1978.17 17.3750   2
  -1   0   1 1759.88 17.6701   2
  -1   0   1 1987.28 16.8120   1
  -1   0   1 1810.01 12.5560   2
   1   0  -1 1993.34 20.1971   1
  -1   0  -1 0.49989 2.10657   3
  -1   0  -2 835.195 13.8713   3
  -1   0  -3 20.0671 4.39702   3
  -1   0  -4 8.83654 4.67181   3
  -1   0  -5 930.539 9.45343   2
  -1   0  -5 889.757 19.7449   3
  -1   0  -5 938.378 12.6816   2
  -1   0  -6 12.2585 3.64323   2
  -1   0  -6 10.6236 2.16377   2
  -1   0  -6 21.8327 6.16909   3
   1   0   6 8.08434 1.98974   1
  -1   0  -7-0.54439 5.81299   3
  -1   0  -7 5.66798 3.73166   2
  -1   0  -7-0.01265 1.94528   2
   1   0   7 3.51948 2.51920   1
  -1   0  -8 5660.52 59.9566   3
  -1   0  -8 5613.62 46.6171   2
  -1   0  -8 5785.25 34.1979   2
   1   0   8 5891.08 39.0503   1
   1   0   9 157.497 7.84915   1
  -1   0  -9 143.524 9.31824   2
  -1   0  -9 150.214 6.45701   2
  -1   0  -9 159.650 12.3365   3
  -1   0 -10 50.7694 6.80996   2
  -1   0 -10 53.7816 4.52730   2
   1   0  10 56.9041 6.07640   1
  -1   0 -10 53.8803 8.53579   3
  -1   0 -11-2.26450 7.28250   3
   1   0  11 7.01813 4.23538   1
  -1   0 -11 5.62561 5.76077   2
  -1   0 -11 0.04765 2.92635   2
  -1   0 -12 32.1360 4.62245   2
   1   0  12 32.7224 5.87048   1
  -1   0 -12 38.3223 10.3707   3
  -1   0 -12 26.0950 6.80590   2
  -1   0 -13 163.826 12.4293   2
   1   0  13 183.314 11.7967   1
  -1   0 -13 212.454 9.88120   2
  -1   0 -14 2498.24 33.8265   2
  -1   0 -14 2495.13 55.1380   3
   1   0  14 2515.08 42.7828   1
  -1   0 -14 2577.75 46.7178   2
  -1   0 -15 25.5312 10.9797   3
  -1   0 -15 16.3207 5.34080   2
   1   0  15 15.5681 6.97644   1
  -1   0 -15 12.0368 7.67364   2
  -1   0 -16 3.29331 7.74210   2
  -1   0 -16-1.88363 11.0310   3
  -1   0 -17 483.708 29.3414   3
  -1   0 -17 504.530 24.4771   2
  -1   0 -18 210.117 18.0706   2
  -1   0 -18 224.054 22.1241   3
  -1   0 -19 60.2227 12.8887   2
  -1   0 -20 149.476 17.5790   2
  -1   0 -21 1.39807 11.1186   2
  -1   0 -22-11.6768 12.8585   2
  -1   0 -23 340.145 25.3336   2
  -1   0 -24 11.2056 12.9282   2
  -1   0 -25 85.5233 17.2131   2
  -1   0 -26 314.285 27.2070   2
   1   1 -26 112.624 20.8581   2
   1   1 -25 102.962 20.7042   2
   1   1 -24 99.2138 19.4932   2
   1   1 -23 16.7140 13.1842   2
   1   1 -22 19.2088 13.5694   2
   1   1 -21 166.921 20.4325   2
   1   1 -20 31.7124 13.4587   2
   1   1 -19 4.99708 10.3624   2
   1   1 -18 53.4547 13.3846   2
  -1  -1  18 46.6428 12.1435   1
   1   1 -17 1918.30 51.6977   2
  -1  -1  17 1815.12 49.8891   1
  -1  -1  16 1.47707 8.77303   1
   1   1 -16 10.9957 9.61136   2
  -1  -1  15 22.7600 8.73707   1
   1   1 -15 9.68241 8.74749   2
  -1  -1  14 4.37655 7.42955   1
   1   1 -14 16.6513 8.93501   2
   1   1 -14 3.37227 2.70745   1
  -1  -1  13 114.721 12.5160   1
   1   1 -13 105.939 6.43972   1
   1   1 -13 114.171 6.48292   1
   1   1 -13 119.775 13.3595   2
   1   1 -12 353.261 19.1436   2
  -1  -1  12 443.951 20.7116   1
   1   1 -12 426.279 15.1175   2
   1   1 -12 417.210 12.8179   1
   1   1 -11 811.739 26.6987   2
   1   1 -11 824.004 18.7216   1
  -1  -1  11 825.707 26.3308   1
   1   1 -11 881.777 20.3498   2
  -1  -1  10 0.27039 5.79895   1
   1   1 -10 8.10592 4.55438   1
   1   1 -10 2.54300 6.50928   2
   1   1 -10 1.69181 3.54413   2
   1   1  -9 3.88914 4.38551   1
   1   1  -9 1.88481 3.34962   2
  -1  -1   9-1.17283 5.16730   1
   1   1  -9 4.75068 5.87142   2
   1   1  -8 6242.78 51.7168   1
   1   1  -8 6288.53 46.3027   2
   1   1  -8 6054.35 61.6159   2
  -1  -1   8 5971.74 59.4629   1
  -1  -1   7 673.170 19.3469   1
   1   1  -7 611.238 19.1755   2
   1   1  -7 627.797 16.8826   1
   1   1  -6 0.66087 4.64134   1
  -1  -1   6 1.59769 2.76505   2
   1   1  -6 2.68663 4.82512   2
  -1  -1   6-7.01233 5.11491   1
   1   1  -5 1112.89 22.0448   2
  -1  -1   5 1134.51 16.6594   2
   1   1  -5 1062.88 20.2227   1
  -1  -1   5 1034.36 21.0154   1
   1   1  -4 8.57102 4.58549   1
  -1  -1   4 2.00772 4.29938   1
  -1  -1   4 5.90570 2.85126   2
   1   1  -4 0.43689 4.55746   2
  -1  -1   3 27.4681 3.27953   2
   1   1  -3 15.4475 4.42241   2
   1   1  -3 21.7288 5.22032   1
  -1  -1   3 19.3576 4.76122   1
   1   1  -2 1989.15 23.2385   1
  -1  -1   2 1825.31 16.9790   2
   1   1  -2 1874.90 21.9187   2
   1   1  -2 1917.61 17.2763   2
  -1  -1   2 1900.23 21.7491   1
   1   1  -1 13.5266 2.95619   2
  -1  -1   1 23.5948 3.64215   1
  -1  -1   1 15.1609 2.20349   2
   1   1  -1 14.2944 3.69184   1
   1   1   0 20.5207 2.34101   2
  -1  -1   0 20.0595 1.90818   2
   1   1   0 17.6009 3.05428   1
  -1  -1   0 21.9480 3.03913   1
  -1  -1  -1 1.06932 1.19984   2
   1   1   1-2.06623 1.17552   2
  -1  -1  -2 31.8713 3.79125   3
  -1  -1  -3 14.3973 4.13157   3
  -1  -1  -4 6282.54 45.4941   3
  -1  -1  -5 7.40428 4.82487   3
  -1  -1  -5 3.81015 1.52167   2
  -1  -1  -6 62.5729 7.16453   3
  -1  -1  -6 65.5825 3.27581   2
   1   1   6 72.8014 3.12978   1
  -1  -1  -7 140.113 5.01392   2
   1   1   7 148.917 5.05548   1
  -1  -1  -7 170.642 10.9598   3
  -1  -1  -8 174.985 6.04972   2
   1   1   8 183.322 6.45674   1
  -1  -1  -8 164.453 11.5519   3
  -1  -1  -9 53.6504 4.07498   2
   1   1   9 48.6868 4.45072   1
  -1  -1  -9 55.5545 8.56499   3
   1   1  10 3452.96 33.8822   1
  -1  -1 -10 3419.79 29.7550   2
  -1  -1 -10 3322.88 40.0691   2
  -1  -1 -10 3436.50 51.6227   3
  -1  -1 -11 3.67894 5.37703   2
   1   1  11 4.49416 3.63504   1
  -1  -1 -11 2.55621 6.43548   3
  -1  -1 -11 13.2218 3.45215   2
  -1  -1 -12 9.39328 3.54998   2
  -1  -1 -12 4.63477 5.55325   2
  -1  -1 -12 5.43249 7.61356   3
   1   1  12 8.84350 4.50058   1
  -1  -1 -13 2418.84 30.6635   2
  -1  -1 -13 2342.43 41.7543   2
   1   1  13 2235.94 35.4567   1
  -1  -1 -13 2274.04 48.4627   3
   1   1  14 103.442 9.60765   1
  -1  -1 -14 119.242 11.6981   2
  -1  -1 -14 113.440 13.3997   3
  -1  -1 -14 140.882 8.85028   2
  -1  -1 -15 192.887 14.8525   2
   1   1  15 212.223 13.4264   1
  -1  -1 -15 224.960 11.2172   2
  -1  -1 -15 221.951 18.6854   3
  -1  -1 -16 47.7794 10.3647   2
  -1  -1 -16 40.0099 12.1183   3
  -1  -1 -17 40.5767 12.7222   3
  -1  -1 -17 36.8529 10.2472   2
  -1  -1 -18 7.40886 11.5956   3
  -1  -1 -18 15.1444 9.24535   2
  -1  -1 -19 912.026 34.9751   2
  -1  -1 -19 952.362 41.4516   3
  -1  -1 -20-7.17138 12.6776   3
  -1  -1 -20 10.5812 10.5774   2
  -1  -1 -21 10.5247 15.0355   3
  -1  -1 -21 17.0864 11.1522   2
  -1  -1 -22 3.50695 11.6289   2
  -1  -1 -23 44.3580 14.3860   2
  -1  -1 -24 33.5505 14.0507   2
  -1  -1 -25 320.999 27.0552   2
  -1  -1 -26 140.854 21.3535   2
   1   2 -25 15.3045 15.1849   2
   1   2 -24 183.790 23.1778   2
   1   2 -23 153.489 21.2456   2
   1   2 -22 76.9910 16.6965   2
   1   2 -21 574.613 34.3934   2
   1   2 -20-10.7007 14.0955   2
   1   2 -19 24.7783 13.4069   2
  -1  -2  18 40.3769 12.5576   1
   1   2 -18 22.7838 11.7397   2
  -1  -2  17 42.8071 13.0166   1
   1   2 -17 52.4213 12.7347   2
   1   2 -16 559.460 28.3143   2
  -1  -2  16 596.841 29.3931   1
  -1  -2  15 313.006 21.1560   1
   1   2 -15 291.434 20.5514   2
   1   2 -14 4.76237 3.04654   1
  -1  -2  14-4.02446 8.50101   1
   1   2 -14-4.50599 8.64839   2
   1   2 -13 112.896 13.6430   2
  -1  -2  13 82.5936 11.3943   1
   1   2 -13 100.889 6.53832   1
   1   2 -12 3954.28 40.0223   1
  -1  -2  12 3679.77 59.2101   1
   1   2 -12 3993.86 39.2408   1
   1   2 -12 3794.05 61.2520   2
   1   2 -11 162.216 9.84366   2
  -1  -2  11 142.182 13.0591   1
   1   2 -11 149.984 8.87829   1
   1   2 -11 146.447 9.05583   1
   1   2 -11 161.988 13.8661   2
   1   2 -10-0.12266 6.44823   2
   1   2 -10 11.4396 4.35560   2
  -1  -2  10 2.66419 6.18532   1
   1   2 -10 0.85751 4.65159   1
   1   2  -9 2.72318 4.31856   1
  -1  -2   9-1.45692 5.65526   1
   1   2  -8 96.2666 9.77014   2
  -1  -2   8 92.4936 9.34164   1
   1   2  -8 103.494 8.20547   1
  -1  -2   7 223.841 12.6427   1
   1   2  -7 228.925 11.1577   1
   1   2  -7 252.150 13.4765   2
   1   2  -6 1508.99 28.8039   2
   1   2  -6 1612.26 27.1071   1
  -1  -2   6 1468.83 20.8739   2
  -1  -2   6 1516.59 28.9719   1
   1   2  -5 3.69064 4.82003   2
  -1  -2   5 0.61692 4.53143   1
   1   2  -5-0.91811 4.69742   1
  -1  -2   5 4.27083 2.84625   2
   1   2  -4 28.3570 5.50722   1
   1   2  -4 25.4870 3.93492   2
  -1  -2   4 31.5774 3.96348   2
  -1  -2   4 27.3413 5.56548   1
   1   2  -4 21.1168 5.24528   2
   1   2  -3 2631.99 25.2082   2
  -1  -2   3 2476.99 23.9692   2
   1   2  -3 2645.86 31.7993   1
   1   2  -3 2817.82 31.7489   2
  -1  -2   3 2800.88 33.3668   1
  -1  -2   2 177.039 9.16233   1
  -1  -2   2 186.251 6.55036   2
   1   2  -2 178.793 8.15310   2
   1   2  -2 171.553 9.10886   1
  -1  -2   1 56.7710 6.07104   1
  -1  -2   1 57.5687 3.98083   2
   1   2  -1 59.4131 5.03899   2
   1   2  -1 67.7332 5.90667   1
  -1  -2   0 5270.09 27.9435   2
   1   2   0 5433.64 38.2858   1
   1   2   0 5511.68 32.8111   2
  -1  -2   0 5323.19 39.7817   1
  -1  -2  -1 23.5951 4.84438   1
   1   2   1 18.5832 2.78795   2
   1   2   1 17.0016 3.79263   1
  -1  -2  -1 13.6865 2.12128   2
  -1  -2  -2-1.43548 4.04681   1
   1   2   2 1.42513 1.96206   2
   1   2   2 0.04516 2.94083   1
  -1  -2  -3 872.621 10.3075   2
  -1  -2  -3 903.765 14.5955   1
  -1  -2  -3 902.946 12.1285   1
   1   2   3 846.605 12.4674   1
  -1  -2  -4 75.7339 6.55859   3
  -1  -2  -4 81.3395 3.68215   2
   1   2   4 87.1269 4.29788   1
   1   2   4 83.3442 4.32331   1
  -1  -2  -5 22.3384 2.48888   2
   1   2   5 22.8982 2.92174   1
  -1  -2  -5 26.4526 5.63779   3
   1   2   6 3670.83 25.1278   1
  -1  -2  -6 3444.17 22.4443   2
  -1  -2  -6 3593.96 41.2070   3
   1   2   7 1.66751 2.22042   1
  -1  -2  -7 4.27735 5.41454   3
  -1  -2  -7 2.17712 2.12942   2
   1   2   8 7.20824 2.64878   1
  -1  -2  -8 10.4775 2.62510   2
  -1  -2  -8 20.2204 6.08494   3
  -1  -2  -9 5701.01 62.5742   3
  -1  -2  -9 5907.31 36.4605   2
   1   2   9 5959.52 39.9035   1
  -1  -2 -10 51.3714 4.39809   2
   1   2  10 59.7099 5.28486   1
  -1  -2 -10 50.1637 8.46172   3
   1   2  11 15.7493 4.23092   1
  -1  -2 -11 14.6071 7.80521   3
  -1  -2 -11 14.5874 3.35966   2
  -1  -2 -12 22.5081 7.89466   3
  -1  -2 -12 25.3062 4.37374   2
   1   2  12 17.5281 4.54610   1
  -1  -2 -13 183.985 8.97129   2
  -1  -2 -13 168.808 14.5783   3
  -1  -2 -13 166.670 12.2437   2
   1   2  13 166.621 10.3002   1
  -1  -2 -14 63.2728 6.25099   2
  -1  -2 -14 71.8197 9.98014   2
  -1  -2 -14 100.325 13.3758   3
   1   2  14 74.5214 8.18334   1
  -1  -2 -15 2764.98 35.8153   2
  -1  -2 -15 2743.65 49.1416   2
  -1  -2 -15 2745.02 57.1253   3
   1   2  15 2685.96 42.7740   1
  -1  -2 -16 7.73593 8.08150   2
  -1  -2 -16-3.89728 10.1974   3
   1   2  16-6.55523 6.50891   1
  -1  -2 -17 32.6084 10.0969   2
  -1  -2 -17 18.7056 10.8045   3
  -1  -2 -18 283.281 19.9505   2
  -1  -2 -18 313.641 24.0026   3
  -1  -2 -19 127.498 17.7549   3
  -1  -2 -19 95.1038 13.7522   2
  -1  -2 -20 70.3151 12.8299   2
  -1  -2 -20 86.2713 17.0088   3
  -1  -2 -21 283.089 22.6204   2
  -1  -2 -21 312.077 27.8848   3
  -1  -2 -22 14.8700 11.1366   2
  -1  -2 -22-9.79397 16.6525   3
  -1  -2 -23 44.4582 13.5225   2
  -1  -2 -24 194.626 21.3565   2
  -1  -2 -25 40.7916 15.9755   2
  -1  -2 -26 16.5013 13.8352   2
  -1  -2 -27 256.623 25.2253   2
   1   3 -24 102.025 21.7832   2
   1   3 -23 59.6579 17.1042   2
   1   3 -22 2.34980 13.6951   2
   1   3 -21 9.04507 12.5744   2
   1   3 -20 234.145 23.3289   2
   1   3 -19 9.26134 10.4757   2
   1   3 -18 40.2634 13.2620   2
  -1  -3  18 10.0065 11.1605   1
  -1  -3  17 117.883 17.3054   1
   1   3 -17 127.773 17.0560   2
   1   3 -16 2114.54 54.8870   2
  -1  -3  16 2096.58 56.2647   1
   1   3 -15 139.877 16.3452   2
  -1  -3  15 138.215 16.1111   1
  -1  -3  14-3.01050 9.17629   1
   1   3 -14 13.0461 3.95094   1
   1   3 -14 8.39582 8.70547   2
  -1  -3  13 89.0875 12.7225   1
   1   3 -13 53.2061 11.3442   2
   1   3 -13 77.5570 6.55734   1
   1   3 -12 141.209 8.84698   1
  -1  -3  12 144.509 14.6813   1
   1   3 -12 129.306 13.5923   2
   1   3 -11 307.495 18.4306   2
  -1  -3  11 359.369 19.9849   1
   1   3 -11 342.445 13.5448   1
   1   3 -11 356.754 14.2359   1
   1   3 -10 649.783 18.2978   1
   1   3 -10 540.386 17.2394   1
   1   3 -10 610.170 24.0615   2
  -1  -3  10 559.757 23.6360   1
   1   3  -9 10.4150 4.85901   1
   1   3  -9 2.47420 4.34545   1
   1   3  -9 5.76826 6.29892   2
  -1  -3   9 1.33606 6.85820   1
   1   3  -8 2.84132 5.76160   2
  -1  -3   8-1.40604 5.77774   1
   1   3  -8 5.93308 4.63341   1
   1   3  -7 4329.37 47.1624   1
   1   3  -7 4319.98 53.6588   2
  -1  -3   7 4210.09 55.4480   1
   1   3  -6 383.018 14.6791   1
  -1  -3   6 367.308 16.5515   1
  -1  -3   6 417.057 11.8983   2
   1   3  -6 381.706 16.3021   2
   1   3  -5 50.7760 6.68336   1
   1   3  -5 58.2150 5.78469   2
  -1  -3   5 50.6748 7.47164   1
  -1  -3   5 48.6832 4.66702   2
   1   3  -5 52.2181 7.16279   2
   1   3  -4 919.934 21.8011   2
  -1  -3   4 967.569 24.1649   1
   1   3  -4 935.408 21.5428   1
  -1  -3   4 993.788 16.9099   2
   1   3  -3 9.07301 4.87671   1
   1   3  -3 19.5941 5.42552   2
  -1  -3   3 13.4104 3.10624   2
  -1  -3   2 17.9315 3.60759   2
   1   3  -2 10.9882 5.20559   1
  -1  -3   2 14.4921 5.73968   1
   1   3  -2 18.5708 5.00919   2
   1   3  -1 900.423 17.5512   2
  -1  -3   1 875.038 21.0311   1
   1   3  -1 874.135 18.9808   1
   1   3   0 46.0186 5.90108   1
   1   3   0 42.5251 4.82384   2
  -1  -3   0 47.5456 6.92567   1
   1   3   1 30.7960 5.26777   1
   1   3   1 23.2392 3.52135   2
  -1  -3  -1 27.6203 6.30968   1
  -1  -3  -2-2.70641 5.36475   1
   1   3   2 2.16082 2.60117   2
   1   3   3 44.9567 4.91789   1
   1   3   3 41.0710 3.43414   2
   1   3   3 34.6184 4.52135   1
  -1  -3  -3 51.8647 7.50312   1
   1   3   4 43.4551 4.73620   1
  -1  -3  -4 40.6897 3.58234   2
   1   3   4 33.0033 4.12948   1
  -1  -3  -4 38.1315 6.49484   1
  -1  -3  -5 9774.17 43.0459   2
   1   3   5 9819.17 50.3034   1
  -1  -3  -5 9802.14 58.7973   1
  -1  -3  -6 2.31967 2.52255   2
  -1  -3  -6-0.77275 2.59140   1
  -1  -3  -6 5.24911 5.67292   3
  -1  -3  -6 3.58314 4.08129   1
   1   3   6-2.22913 2.94861   1
   1   3   7 79.1070 5.33004   1
  -1  -3  -7 60.6326 4.30451   2
  -1  -3  -7 73.7194 8.47756   3
  -1  -3  -7 71.1933 4.29339   1
  -1  -3  -8 1.29314 2.47322   2
  -1  -3  -8 6.28401 6.46537   3
   1   3   8 1.15536 2.88311   1
  -1  -3  -9 132.713 11.0708   3
   1   3   9 120.494 6.76800   1
  -1  -3  -9 137.529 6.45024   2
   1   3  10 118.772 7.13634   1
  -1  -3 -10 141.258 12.1887   3
  -1  -3 -10 119.478 6.39123   2
  -1  -3 -11 2271.28 26.8096   2
  -1  -3 -11 2224.87 43.9866   3
   1   3  11 2268.85 30.2118   1
   1   3  12 7.48801 4.53908   1
  -1  -3 -12 3.84384 3.20743   2
  -1  -3 -13 1.76315 3.51222   2
   1   3  13 2.60821 4.54017   1
  -1  -3 -13 8.92610 8.49063   3
  -1  -3 -14 2715.49 33.7522   2
   1   3  14 2661.59 39.4168   1
  -1  -3 -14 2686.06 54.8586   3
  -1  -3 -15 142.209 13.0847   2
  -1  -3 -15 150.155 9.06747   2
  -1  -3 -15 142.759 15.8158   3
   1   3  15 135.702 10.8829   1
   1   3  16 100.125 10.0904   1
  -1  -3 -16 77.5713 12.7533   3
  -1  -3 -16 90.0611 12.0704   2
  -1  -3 -17 215.967 19.8510   3
  -1  -3 -17 228.787 17.3995   2
  -1  -3 -18 38.1743 13.7246   3
  -1  -3 -18 8.18830 9.43403   2
  -1  -3 -19 32.0425 12.1161   2
  -1  -3 -19 42.3329 12.5034   3
  -1  -3 -20 682.344 35.3083   3
  -1  -3 -20 629.634 30.9861   2
  -1  -3 -21 31.4167 12.4446   2
  -1  -3 -21 27.4243 13.9409   3
  -1  -3 -22 50.5380 16.1701   3
  -1  -3 -22 46.2945 13.8856   2
  -1  -3 -23 42.2179 13.6935   2
  -1  -3 -24 33.6969 15.3846   2
  -1  -3 -25 56.4633 16.8597   2
  -1  -3 -26 389.696 30.4786   2
  -1  -3 -27 131.728 20.3131   2
   1   4 -24 25.3395 17.3541   2
   1   4 -23 107.837 21.0158   2
   1   4 -22 67.0330 17.1244   2
   1   4 -21 197.910 24.2334   2
   1   4 -20 919.905 43.4584   2
   1   4 -19 18.8248 12.7340   2
   1   4 -18-0.99018 11.1764   2
  -1  -4  18-21.5843 13.8034   1
  -1  -4  17 64.7885 15.6214   1
   1   4 -17 53.7220 14.5698   2
  -1  -4  16 69.4289 14.2147   1
   1   4 -16 96.2695 15.2146   2
   1   4 -15 329.355 23.4480   2
  -1  -4  15 280.452 22.9392   1
  -1  -4  14 198.952 18.9225   1
   1   4 -14 190.798 17.8129   2
   1   4 -13-6.16614 9.64814   2
   1   4 -13 2.14112 4.45267   1
  -1  -4  13-11.7678 10.5015   1
   1   4 -12 221.180 17.7024   2
   1   4 -12 228.813 11.8426   1
  -1  -4  12 246.581 19.4259   1
  -1  -4  11 4031.02 68.3107   1
   1   4 -11 4017.76 64.6585   2
   1   4 -11 4145.29 47.3535   1
   1   4 -10 288.693 13.6844   1
  -1  -4  10 314.524 19.1581   1
   1   4 -10 312.551 18.4484   2
  -1  -4   9 7.94161 7.57025   1
   1   4  -9 0.72728 4.80761   1
   1   4  -9 3.67118 4.80866   1
   1   4  -9 3.52593 6.47938   2
  -1  -4   8 61.1355 9.87891   1
   1   4  -8 56.8863 7.69483   1
   1   4  -8 70.1423 7.94808   1
   1   4  -8 58.0777 6.99564   2
   1   4  -8 72.8727 9.66027   2
   1   4  -7 79.6103 7.42462   2
   1   4  -7 81.8262 9.87268   2
   1   4  -7 71.0600 8.43696   1
  -1  -4   7 90.6706 10.9483   1
   1   4  -7 93.5541 8.62545   1
   1   4  -6 72.2982 8.12916   1
   1   4  -6 74.1570 8.99406   2
  -1  -4   6 78.3381 10.0809   1
   1   4  -6 97.9047 9.20175   1
   1   4  -5 440.550 16.0633   1
   1   4  -5 461.289 16.8962   1
   1   4  -5 509.291 18.5204   2
  -1  -4   5 436.708 19.3076   1
  -1  -4   4-1.89418 6.60247   1
   1   4  -4 11.8708 5.25645   2
   1   4  -4 15.6981 5.96459   1
   1   4  -3 7.98666 4.68907   2
  -1  -4   3 10.3306 6.37813   1
   1   4  -3 20.0478 5.75451   1
   1   4  -2 1315.76 26.3532   1
   1   4  -2 1319.21 24.7368   2
  -1  -4   2 1245.66 29.1914   1
   1   4  -1 366.257 14.0925   1
   1   4  -1 369.064 13.0720   2
  -1  -4   1 388.297 16.5876   1
  -1  -4   0 192.894 12.5131   1
   1   4   0 163.653 9.81208   1
   1   4   0 146.423 8.99794   1
   1   4   0 174.680 8.57413   2
   1   4   1 5643.65 42.7843   2
   1   4   1 5553.75 49.4797   1
  -1  -4  -1 5723.36 58.6204   1
   1   4   1 5580.83 48.1645   1
   1   4   2 27.8845 5.67837   1
   1   4   2 32.8363 5.68069   1
  -1  -4  -2 21.3224 7.17939   1
   1   4   2 26.9442 4.07001   2
   1   4   3 13.0043 4.55170   1
  -1  -4  -3-1.84059 3.23626   2
  -1  -4  -3 4.65832 6.69058   1
   1   4   3 1.36908 2.61248   2
   1   4   3 7.40615 4.57335   1
   1   4   4 269.951 10.7029   1
   1   4   4 266.383 8.26071   2
  -1  -4  -4 279.931 14.1943   1
  -1  -4  -5 58.2843 8.55989   1
   1   4   5 61.3556 5.97504   1
  -1  -4  -6 12.9979 3.03543   2
  -1  -4  -6 10.5265 5.86464   1
   1   4   6 12.5723 4.34641   1
  -1  -4  -7 3155.58 29.5337   2
   1   4   7 3181.64 34.4137   1
  -1  -4  -7 3199.04 38.9206   1
   1   4   8 2.46075 3.43753   1
  -1  -4  -8 12.1281 4.86812   1
  -1  -4  -8 6.91053 3.20340   2
  -1  -4  -8 1.00435 5.97832   3
  -1  -4  -9 91.3487 10.7863   3
  -1  -4  -9 103.987 5.86807   1
   1   4   9 92.6764 6.73808   1
  -1  -4  -9 102.494 6.21291   2
  -1  -4 -10 6120.20 70.3870   3
  -1  -4 -10 6339.65 45.6684   2
   1   4  10 6271.63 51.5172   1
  -1  -4 -11 8.22347 3.65155   2
  -1  -4 -11 2.28025 6.86079   3
   1   4  11 3.36371 4.15162   1
  -1  -4 -12 169.789 8.58146   2
  -1  -4 -12 209.386 15.8691   3
   1   4  12 167.879 10.0608   1
  -1  -4 -13 49.5345 10.9111   3
   1   4  13 32.4638 5.79879   1
  -1  -4 -13 35.0359 4.99324   2
  -1  -4 -14 111.530 8.04556   2
   1   4  14 144.939 10.3433   1
  -1  -4 -14 128.085 14.6101   3
  -1  -4 -15 21.0064 10.3495   3
  -1  -4 -15 49.3731 6.44355   2
   1   4  15 45.3476 7.47225   1
  -1  -4 -16 1155.95 39.9927   3
   1   4  16 1137.22 29.6438   1
  -1  -4 -17 35.7761 12.3526   3
  -1  -4 -17 28.9839 9.58677   2
  -1  -4 -18 24.3499 9.93132   2
  -1  -4 -18 24.5292 12.6957   3
  -1  -4 -19 275.162 23.5309   3
  -1  -4 -19 247.084 20.1763   2
  -1  -4 -20 42.5403 14.5950   3
  -1  -4 -20 66.8063 13.9437   2
  -1  -4 -21 77.7633 17.1314   3
  -1  -4 -21 77.1803 15.5532   2
  -1  -4 -22 645.915 33.8700   2
  -1  -4 -22 701.736 38.9792   3
  -1  -4 -23-0.24845 11.7008   2
  -1  -4 -23 12.0163 14.9777   3
  -1  -4 -24 21.2348 13.4201   2
  -1  -4 -25 56.2342 16.2647   2
  -1  -4 -26 76.8669 18.3999   2
  -1  -4 -27 55.8359 17.5059   2
   1   5 -23 67.8307 19.1421   2
   1   5 -22 41.8474 16.5142   2
   1   5 -21 56.8980 17.2870   2
   1   5 -20 14.1813 13.1640   2
   1   5 -19 241.960 24.6177   2
   1   5 -18 8.31564 12.8061   2
  -1  -5  17 59.1721 16.7654   1
   1   5 -17 39.4779 13.6296   2
   1   5 -16 249.386 22.5233   2
  -1  -5  16 291.820 26.1021   1
  -1  -5  15 1578.74 53.2777   1
   1   5 -15 1560.39 48.8072   2
  -1  -5  14 149.648 18.3849   1
   1   5 -14 120.419 15.7801   2
  -1  -5  13-3.05515 10.2744   1
   1   5 -13 2.91356 5.10224   1
   1   5 -13 4.35676 8.89731   2
   1   5 -12 212.203 11.9904   1
   1   5 -12 216.446 18.2342   2
   1   5 -11 156.188 15.2628   2
   1   5 -11 151.562 10.8980   1
  -1  -5  11 140.596 16.4935   1
   1   5 -10 439.911 22.8667   2
  -1  -5  10 418.695 24.4326   1
   1   5 -10 411.611 17.2689   1
  -1  -5   9 630.698 28.2541   1
   1   5  -9 595.307 25.1553   2
   1   5  -9 573.103 20.0422   1
  -1  -5   8 50.5387 10.4678   1
   1   5  -8 34.4581 8.55140   2
   1   5  -8 47.5071 7.81375   1
  -1  -5   7 2.73675 7.40415   1
   1   5  -7 4.45070 6.74625   2
   1   5  -7 0.92514 5.31385   1
   1   5  -7 1.06055 5.81808   1
   1   5  -6 2037.50 37.1718   1
   1   5  -6 1973.98 35.8411   1
   1   5  -6 2050.33 39.9112   2
  -1  -5   6 2095.03 45.8925   1
   1   5  -5 285.067 15.3849   2
  -1  -5   5 279.547 17.3139   1
   1   5  -5 275.256 13.9707   1
   1   5  -5 293.583 14.7418   1
   1   5  -4 47.7590 7.66378   1
   1   5  -4 73.9358 8.91428   1
   1   5  -4 46.6857 7.31372   2
  -1  -5   4 71.0815 10.4280   1
   1   5  -3 422.160 16.9797   1
   1   5  -3 406.486 16.5285   1
   1   5  -3 394.837 15.8721   2
  -1  -5   3 428.436 20.3363   1
   1   5  -2 74.2804 8.19308   1
  -1  -5   2 59.2635 9.97394   1
   1   5  -2 91.9292 9.19707   1
   1   5  -2 80.8120 8.10139   2
   1   5  -1 15.1488 5.90355   1
   1   5  -1 8.46604 5.33652   1
  -1  -5   1 10.5840 7.54657   1
   1   5  -1 14.1761 4.85177   2
   1   5   0 457.565 16.3977   1
   1   5   0 433.920 14.4179   2
   1   5   0 479.621 17.1245   1
  -1  -5   0 486.957 20.5891   1
   1   5   1 63.6393 6.04236   2
   1   5   1 36.8478 6.37101   1
  -1  -5  -1 58.9780 9.21249   1
   1   5   1 51.6579 7.16117   1
   1   5   2 19.9200 6.12717   1
  -1  -5  -2 5.08162 7.27813   1
   1   5   2 19.3021 4.22245   2
   1   5   2 20.3841 5.77369   1
   1   5   3 49.7474 5.06217   2
  -1  -5  -3 42.9773 8.91607   1
   1   5   3 45.2246 6.41100   1
  -1  -5  -4 346.021 17.5158   1
   1   5   4 354.855 13.7128   1
   1   5   4 356.778 10.7841   2
  -1  -5  -5 400.537 12.7303   2
   1   5   5 400.030 11.1814   2
  -1  -5  -5 422.269 19.0584   1
   1   5   5 370.368 14.2403   1
   1   5   6 12012.6 75.7073   1
  -1  -5  -6 11894.2 92.9690   1
  -1  -5  -7 82.9227 9.85252   1
   1   5   7 116.741 8.50366   1
   1   5   8 99.8306 7.95782   1
  -1  -5  -8 119.699 10.6204   1
  -1  -5  -8 76.9294 5.98289   2
  -1  -5  -9 3.93448 5.23513   1
  -1  -5  -9-0.70138 3.42414   2
   1   5   9 6.26625 4.17731   1
  -1  -5  -9 0.73085 6.40045   3
   1   5  10 134.730 9.08142   1
  -1  -5 -10 136.942 8.18516   2
  -1  -5 -10 140.154 13.2197   3
  -1  -5 -10 173.581 9.71148   1
  -1  -5 -11 55.5872 5.01863   1
  -1  -5 -11 53.3652 5.99291   2
  -1  -5 -11 48.5955 9.64698   3
   1   5  11 56.9771 6.88350   1
  -1  -5 -12 2164.46 30.7947   2
   1   5  12 2158.04 34.8468   1
  -1  -5 -12 2113.65 46.6014   3
   1   5  13-1.07764 4.78528   1
  -1  -5 -13 11.2593 8.20662   3
  -1  -5 -13-0.31663 3.86158   2
  -1  -5 -14 6.02306 5.07960   2
  -1  -5 -14 0.35287 9.00685   3
   1   5  14 1.76828 4.82683   1
   1   5  15 2140.47 39.1562   1
  -1  -5 -15 2081.21 52.1545   3
  -1  -5 -16-9.94896 10.3751   3
   1   5  16 7.03015 6.13819   1
   1   5  17 200.419 14.3981   1
  -1  -5 -17 252.530 21.9251   3
  -1  -5 -18 234.500 21.9772   3
  -1  -5 -19 29.1748 10.7408   2
  -1  -5 -19 18.7134 12.6457   3
  -1  -5 -20 28.6386 14.2614   3
  -1  -5 -20 32.2001 11.8238   2
  -1  -5 -21 218.156 20.5854   2
  -1  -5 -21 303.042 26.5388   3
  -1  -5 -22 117.188 17.2559   2
  -1  -5 -22 159.240 22.0047   3
  -1  -5 -23 38.9852 17.1027   3
  -1  -5 -23 38.2477 14.9730   2
  -1  -5 -24 18.0157 13.4113   2
  -1  -5 -25 21.5414 14.4502   2
  -1  -5 -26 1.47636 12.9165   2
  -1  -5 -27 592.673 37.7809   2
   1   6 -22 26.2249 16.4597   2
   1   6 -21 78.6826 18.8019   2
   1   6 -20 320.023 28.7035   2
   1   6 -19 866.687 42.2663   2
   1   6 -18 16.6821 13.0484   2
  -1  -6  17-7.99751 16.8138   1
   1   6 -17-7.01080 11.6721   2
  -1  -6  16 237.005 26.3113   1
   1   6 -16 209.096 21.6383   2
  -1  -6  15 167.162 21.3719   1
   1   6 -15 120.633 17.2026   2
   1   6 -14 271.953 21.9477   2
  -1  -6  14 354.196 27.6532   1
   1   6 -13 42.3847 7.04160   1
   1   6 -13 50.2340 11.6271   2
  -1  -6  13 57.7090 16.1002   1
  -1  -6  12 11.8483 11.5231   1
   1   6 -12 6.99156 9.01861   2
   1   6 -12 8.12442 5.87224   1
   1   6 -11 263.404 19.5943   2
  -1  -6  11 295.514 23.4039   1
   1   6 -11 330.700 16.0432   1
   1   6 -10 3179.28 60.0090   2
   1   6 -10 2956.35 46.1879   1
  -1  -6  10 3128.56 67.8156   1
  -1  -6   9 705.688 32.6541   1
   1   6  -9 711.205 23.6141   1
   1   6  -9 719.398 28.2237   2
  -1  -6   8 29.2434 10.4113   1
   1   6  -8 40.4293 8.70048   1
   1   6  -8 25.2572 8.65660   2
  -1  -6   7 12.0391 8.46051   1
   1   6  -7 14.7590 6.70927   1
   1   6  -7 5.16669 6.91227   2
   1   6  -6 12.6874 6.50123   2
  -1  -6   6 14.4937 9.30108   1
   1   6  -6 17.6245 6.53712   1
   1   6  -5 69.7025 9.35914   2
  -1  -6   5 46.6362 10.5706   1
  -1  -6   4 219.335 16.9465   1
   1   6  -4 199.196 12.8961   2
   1   6  -4 195.261 12.9798   1
   1   6  -3 70.3547 8.48193   1
   1   6  -3 63.7084 8.44807   2
  -1  -6   3 59.1583 11.1130   1
   1   6  -2 57.2945 7.44597   2
   1   6  -2 56.3593 8.29256   1
  -1  -6   2 44.1783 9.46970   1
  -1  -6   1 488.032 23.0392   1
   1   6  -1 522.173 17.6077   2
   1   6  -1 530.835 19.4938   1
   1   6   0 236.733 11.9241   2
   1   6   0 221.588 12.9160   1
  -1  -6   0 257.903 17.5295   1
  -1  -6  -1 207.629 16.0436   1
   1   6   1 168.098 11.3137   1
   1   6   1 181.563 10.1841   2
  -1  -6  -2 3809.02 60.4091   1
   1   6   2 3887.34 48.7970   1
   1   6   2 3753.19 41.4028   2
   1   6   3 68.3314 6.36710   2
  -1  -6  -3 62.1022 10.9803   1
   1   6   3 79.5333 8.21035   1
  -1  -6  -4 3.21316 8.02751   1
   1   6   4 5.49760 3.46572   2
   1   6   4 7.77806 5.50885   1
   1   6   5 153.296 7.96846   2
   1   6   5 157.369 10.7525   1
  -1  -6  -5 154.231 14.3220   1
   1   6   6 75.3527 6.10413   2
  -1  -6  -6 87.9300 11.5612   1
   1   6   6 86.9412 8.43312   1
   1   6   7-3.18081 4.95067   1
  -1  -6  -7-1.99957 7.62730   1
  -1  -6  -8 1272.70 33.5092   1
   1   6   8 1226.17 27.0978   1
  -1  -6  -9-1.44187 7.30733   1
   1   6   9 1.49507 4.58788   1
   1   6  10 42.1461 6.79924   1
  -1  -6 -10 32.7755 5.56630   2
  -1  -6 -10 33.2969 7.71053   1
  -1  -6 -11 5746.76 57.7384   1
   1   6  11 5587.34 59.3886   1
  -1  -6 -11 5890.36 53.0352   2
  -1  -6 -11 5451.00 74.2549   3
  -1  -6 -12 26.3201 9.90133   3
  -1  -6 -12 13.5787 4.49365   2
   1   6  12 23.6487 6.02042   1
  -1  -6 -12 26.4262 5.28899   1
  -1  -6 -13 157.635 15.9458   3
   1   6  13 181.544 12.2287   1
   1   6  14 34.8083 7.42353   1
  -1  -6 -14 31.2153 10.9240   3
   1   6  15 67.9788 9.52633   1
  -1  -6 -15 66.0091 13.2868   3
   1   6  16 274.589 16.3087   1
  -1  -6 -16 250.827 21.3286   3
  -1  -6 -17 1066.32 41.3676   3
   1   6  17 1027.43 30.8649   1
  -1  -6 -18 45.3970 14.4329   3
  -1  -6 -19 19.4872 12.4128   3
  -1  -6 -20 199.749 22.4411   3
  -1  -6 -21 4.76510 13.5567   3
  -1  -6 -21 14.0793 11.0113   2
  -1  -6 -22 184.859 20.9190   2
  -1  -6 -22 170.283 22.1908   3
  -1  -6 -23 751.048 38.2563   2
  -1  -6 -23 802.500 43.3056   3
  -1  -6 -24 3.40291 15.0638   3
  -1  -6 -24-10.8198 14.5870   2
  -1  -6 -25-4.61101 14.2829   2
  -1  -6 -26 25.4033 15.9624   2
  -1  -6 -27 110.031 22.2990   2
   1   7 -21 3.76808 14.0534   2
   1   7 -20 156.081 22.3237   2
   1   7 -19 15.5282 13.9823   2
   1   7 -18 201.550 23.2474   2
  -1  -7  17 16.7986 16.5220   1
   1   7 -17-2.14266 11.7932   2
   1   7 -16 2.28904 12.4350   2
  -1  -7  16-6.57634 16.1063   1
  -1  -7  15 480.172 35.1566   1
   1   7 -15 485.257 29.9221   2
   1   7 -14 1920.90 54.9077   2
  -1  -7  14 1970.83 64.8983   1
  -1  -7  13 165.068 22.3578   1
   1   7 -13 108.092 15.9172   2
  -1  -7  12 16.1459 12.9757   1
   1   7 -12 15.6471 9.51723   2
   1   7 -12-2.55164 6.13456   1
  -1  -7  11 80.9234 16.5521   1
   1   7 -11 63.7517 12.2078   2
   1   7 -10 375.181 18.3235   1
   1   7 -10 353.685 22.3725   2
  -1  -7  10 368.129 27.6140   1
  -1  -7   9 181.625 20.5586   1
   1   7  -9 179.133 13.3580   1
   1   7  -9 127.980 14.5047   2
   1   7  -8 119.444 13.4577   2
   1   7  -8 146.394 12.7331   1
  -1  -7   8 107.002 16.6826   1
   1   7  -7 41.3614 8.66771   1
   1   7  -7 40.1105 9.27176   2
  -1  -7   7 23.4980 12.2340   1
   1   7  -6 34.0519 8.38050   2
   1   7  -6 35.1983 8.82790   1
  -1  -7   6 20.0324 9.84519   1
   1   7  -5 1420.08 35.8888   2
  -1  -7   5 1450.45 44.7682   1
   1   7  -5 1443.54 35.3264   1
   1   7  -4 765.519 25.9275   2
   1   7  -4 814.546 26.5990   1
  -1  -7   4 760.850 32.5777   1
   1   7  -3 213.079 13.9676   2
  -1  -7   3 191.418 17.5694   1
   1   7  -3 223.303 14.5912   1
  -1  -7   2 1011.01 35.9524   1
   1   7  -2 1043.34 27.6199   2
   1   7  -2 1118.19 30.2922   1
   1   7  -1 1.40328 6.36370   1
   1   7  -1 0.14827 4.71756   2
  -1  -7   1 5.27738 8.62919   1
   1   7   0 5.91079 6.77551   1
  -1  -7   0 3.23018 8.50064   1
   1   7   0 0.45974 4.55101   2
   1   7   1 24.2295 7.26348   1
   1   7   1 24.2057 5.65942   2
  -1  -7  -1 38.2489 11.2170   1
   1   7   2 23.2682 6.78037   1
  -1  -7  -2 23.1137 10.2982   1
   1   7   2 38.8939 6.51496   2
  -1  -7  -3-2.98364 9.76469   1
   1   7   3 16.8542 5.34061   2
   1   7   3 2.98741 6.13420   1
   1   7   4 17.9272 6.32979   1
   1   7   4 24.5104 4.95258   2
  -1  -7  -4 19.5893 8.95609   1
   1   7   5 85.9639 9.58929   1
   1   7   5 104.950 7.88327   2
  -1  -7  -5 121.326 14.5643   1
   1   7   6 192.189 9.57878   2
   1   7   6 187.514 12.5123   1
  -1  -7  -6 220.302 17.6231   1
   1   7   7 3840.20 40.2702   2
   1   7   7 3661.59 50.8440   1
  -1  -7  -7 3848.96 64.9424   1
   1   7   8 61.4906 8.55992   1
  -1  -7  -8 56.6201 6.99519   2
  -1  -7  -8 34.7789 10.2524   1
   1   7   9 34.5025 6.80332   1
  -1  -7  -9 37.7542 10.2648   1
   1   7  10 84.4668 9.24914   1
  -1  -7 -10 66.6463 10.9004   1
   1   7  11 44.6098 7.50529   1
  -1  -7 -11 57.1871 10.2373   1
  -1  -7 -12 76.4284 12.5292   3
   1   7  12 80.5714 9.52870   1
  -1  -7 -12 79.3783 9.65695   1
  -1  -7 -13 1235.21 26.0195   1
  -1  -7 -13 1232.94 40.2523   3
   1   7  13 1329.14 32.2259   1
   1   7  14 6.29408 6.30281   1
  -1  -7 -14 11.0329 10.0141   3
  -1  -7 -15 50.2769 12.9240   3
   1   7  15 77.6352 10.1808   1
   1   7  16 1994.78 43.0590   1
  -1  -7 -16 1935.33 53.9743   3
   1   7  17 22.3995 8.47500   1
  -1  -7 -17 40.6154 14.9055   3
  -1  -7 -18 281.107 24.1617   3
   1   7  18 308.445 19.2032   1
  -1  -7 -19 477.405 31.8390   3
  -1  -7 -20 11.8283 14.5916   3
  -1  -7 -21 33.0413 15.7535   3
  -1  -7 -22 66.1589 15.9788   2
  -1  -7 -22 53.2451 15.7281   3
  -1  -7 -23 112.739 19.2792   2
  -1  -7 -23 141.738 23.3002   3
  -1  -7 -24 20.8280 12.8670   2
  -1  -7 -24 51.9868 17.8336   3
  -1  -7 -25 40.1582 16.2267   2
  -1  -7 -26 25.2650 18.1851   2
  -1  -7 -27 53.7264 18.8260   2
   1   8 -20 119.626 21.2916   2
   1   8 -19 311.789 28.5920   2
   1   8 -18 807.326 41.8279   2
  -1  -8  17 9.16657 19.0063   1
   1   8 -17 1.11410 13.5842   2
   1   8 -16 14.6104 13.7028   2
  -1  -8  16 18.0364 18.1857   1
   1   8 -15 335.782 27.0910   2
  -1  -8  15 248.717 28.8001   1
   1   8 -14 136.012 18.1239   2
  -1  -8  14 173.586 24.4623   1
   1   8 -13 364.870 25.9276   2
  -1  -8  13 361.903 32.5151   1
   1   8 -12 73.3949 9.79230   1
   1   8 -12 58.3956 13.4371   2
  -1  -8  12 71.9547 18.1286   1
   1   8 -11 25.9112 11.4137   2
  -1  -8  11 35.7326 16.5893   1
   1   8 -11 32.3774 8.49591   1
   1   8 -10 170.541 17.1017   2
   1   8 -10 199.145 14.9699   1
  -1  -8  10 171.609 22.2359   1
   1   8  -9 2286.50 53.8393   2
  -1  -8   9 2194.96 64.8503   1
   1   8  -9 2248.61 45.5545   1
   1   8  -8 607.059 24.5402   1
  -1  -8   8 593.648 34.2424   1
   1   8  -8 537.322 26.4163   2
   1   8  -7 111.095 12.3225   1
  -1  -8   7 105.108 17.3629   1
   1   8  -7 111.536 13.3396   2
   1   8  -6 31.9875 8.67213   1
   1   8  -6-4.21317 7.64664   2
  -1  -8   6 18.5871 11.4793   1
   1   8  -5 139.061 13.0828   1
   1   8  -5 143.748 13.4426   2
  -1  -8   5 165.761 20.3226   1
   1   8  -4 2.69973 6.98567   1
   1   8  -4-3.19121 7.02573   2
  -1  -8   4-1.24651 11.2656   1
   1   8  -3-0.25671 6.86342   2
  -1  -8   3 6.95461 10.7590   1
   1   8  -3 9.85742 8.24165   1
  -1  -8   2 8.34424 9.48577   1
   1   8  -2-5.94334 6.85151   1
   1   8  -2 16.3846 6.81697   2
   1   8  -1 13.6240 7.71740   1
   1   8  -1 12.5972 6.44730   2
  -1  -8   1 26.4927 12.2603   1
   1   8   0 152.961 13.2788   1
  -1  -8   0 172.271 18.1420   1
   1   8   0 184.127 12.5790   2
   1   8   1 204.966 12.6497   2
  -1  -8  -1 176.547 17.8153   1
   1   8   1 216.058 14.9098   1
  -1  -8  -2 272.585 21.4248   1
   1   8   2 330.757 17.8129   1
   1   8   2 314.291 14.7284   2
   1   8   3 2520.94 46.3616   1
  -1  -8  -3 2489.07 58.4792   1
   1   8   3 2585.71 38.8959   2
  -1  -8  -4 99.7661 14.2841   1
   1   8   4 100.951 8.61314   2
   1   8   4 94.5308 10.6681   1
  -1  -8  -5 0.79517 10.6433   1
   1   8   5 5.77749 7.14866   1
   1   8   5 3.82503 4.61975   2
   1   8   6 51.5108 8.51515   1
   1   8   6 58.7428 6.67357   2
  -1  -8  -6 77.1757 13.3067   1
   1   8   7 27.7414 5.39477   2
  -1  -8  -7 17.4642 10.8777   1
   1   8   7 23.1643 7.47599   1
   1   8   8 3.54821 6.42238   1
  -1  -8  -8-4.16686 10.1423   1
  -1  -8  -9 688.538 30.1572   1
   1   8   9 660.498 23.8817   1
  -1  -8 -10-4.35113 8.86760   1
   1   8  10-6.15433 5.62624   1
   1   8  11 46.1528 8.82713   1
  -1  -8 -11 27.8339 9.68290   1
  -1  -8 -12 4173.00 64.3679   1
   1   8  12 4157.69 59.9383   1
   1   8  13 114.273 11.7481   1
  -1  -8 -13 85.8475 11.0892   1
  -1  -8 -13 96.1751 14.8472   3
  -1  -8 -14 159.821 11.7785   1
  -1  -8 -14 176.861 18.4438   3
   1   8  14 176.010 14.0873   1
   1   8  15 30.7445 8.39346   1
  -1  -8 -15 4.81934 11.2771   3
  -1  -8 -16 129.203 18.1933   3
   1   8  16 72.4128 11.0864   1
  -1  -8 -17 102.274 17.8183   3
   1   8  17 85.4379 12.1526   1
  -1  -8 -18 126.202 18.9226   3
   1   8  18 190.264 16.9563   1
  -1  -8 -19 99.2174 18.5289   3
  -1  -8 -20 42.5354 16.0771   3
  -1  -8 -21 57.8446 16.7887   3
  -1  -8 -22 0.80402 17.5530   3
  -1  -8 -23 211.642 23.3132   2
  -1  -8 -23 247.677 28.6578   3
  -1  -8 -24 578.276 40.1540   3
  -1  -8 -24 831.155 42.9009   2
  -1  -8 -25-0.36077 16.2070   3
  -1  -8 -25 17.5246 15.3608   2
  -1  -8 -26 4.76269 15.3072   2
  -1  -8 -27 25.7704 17.1642   2
   1   9 -19 115.960 22.0110   2
   1   9 -18 73.7340 17.9003   2
   1   9 -17 130.301 21.6252   2
  -1  -9  17 104.220 26.2112   1
   1   9 -16 7.96286 13.0281   2
  -1  -9  16-13.1055 18.8470   1
   1   9 -15 34.6166 15.1453   2
  -1  -9  15 5.13061 17.7695   1
   1   9 -14 471.580 31.0446   2
  -1  -9  14 473.442 39.1676   1
   1   9 -13 1445.49 50.7633   2
  -1  -9  13 1437.40 61.5961   1
  -1  -9  12 511.971 37.9813   1
   1   9 -12 526.756 30.7777   2
   1   9 -11 5.48587 10.2169   2
   1   9 -11 11.7617 8.64416   1
  -1  -9  11-1.71212 15.3129   1
   1   9 -10 108.356 15.9032   2
   1   9 -10 84.0527 12.1042   1
  -1  -9  10 86.5323 20.3274   1
   1   9  -9 261.894 18.0788   1
  -1  -9   9 291.370 27.8195   1
   1   9  -9 263.931 20.7068   2
   1   9  -8 33.1525 11.1271   2
   1   9  -8 60.5228 10.4660   1
  -1  -9   8 19.9429 14.3422   1
   1   9  -7 19.7887 9.39007   2
   1   9  -7 8.44563 7.87156   1
  -1  -9   7 3.65754 14.7559   1
   1   9  -6 23.3367 8.77754   1
   1   9  -6 30.4933 10.1723   2
  -1  -9   6 25.3001 14.0591   1
  -1  -9   5 36.5652 14.9560   1
   1   9  -5 30.7402 9.30248   2
   1   9  -5 38.3697 10.0040   1
   1   9  -4 1306.11 37.3638   1
  -1  -9   4 1248.79 48.5562   1
   1   9  -4 1359.99 37.6000   2
   1   9  -3 764.982 29.0569   1
  -1  -9   3 839.452 39.6014   1
   1   9  -3 796.870 28.1753   2
  -1  -9   2 248.835 22.7782   1
   1   9  -2 263.953 17.9850   1
   1   9  -2 275.541 16.7382   2
   1   9  -1 824.094 27.0188   2
  -1  -9   1 883.501 39.8499   1
   1   9  -1 816.212 29.5172   1
  -1  -9   0 8.01135 12.8845   1
   1   9   0 7.25507 6.50641   2
   1   9   0 6.25940 7.74888   1
   1   9   1 16.0015 7.93345   1
   1   9   1 13.4337 5.78744   2
   1   9   2 374.492 20.4602   1
  -1  -9  -2 417.288 28.0326   1
   1   9   2 433.515 18.4116   2
   1   9   3 6.56710 7.54324   1
   1   9   3 2.23256 5.17369   2
  -1  -9  -3 14.4386 11.5378   1
   1   9   4 4.51248 7.31561   1
   1   9   4 0.82492 4.88089   2
  -1  -9  -4 4.75079 11.2259   1
   1   9   5 128.575 12.7739   1
  -1  -9  -5 139.702 18.5234   1
  -1  -9  -6 61.5913 14.5986   1
   1   9   6 63.5631 10.1031   1
   1   9   7 76.6574 10.8500   1
  -1  -9  -7 94.5073 16.2253   1
   1   9   8 3138.92 54.8744   1
  -1  -9  -8 3290.38 70.4241   1
   1   9   9 145.126 12.9524   1
  -1  -9  -9 138.598 17.2228   1
   1   9  10 52.4636 9.97462   1
  -1  -9 -10 43.7562 13.1058   1
  -1  -9 -11 211.195 19.3339   1
   1   9  11 155.852 13.9295   1
   1   9  12 9.15287 7.79630   1
  -1  -9 -12 21.5331 11.1025   1
   1   9  13 170.359 14.7806   1
  -1  -9 -13 173.967 16.0211   1
  -1  -9 -14 363.758 19.7555   1
  -1  -9 -14 356.441 25.4339   3
   1   9  14 373.229 20.7608   1
  -1  -9 -15 47.4078 15.0984   3
   1   9  15 31.8655 9.37088   1
   1   9  16 23.8505 8.89353   1
  -1  -9 -16 21.4020 12.6570   3
  -1  -9 -17 706.270 37.5921   3
   1   9  17 722.097 30.0499   1
   1   9  18 105.384 14.5662   1
  -1  -9 -18 109.184 18.6961   3
  -1  -9 -19 211.352 23.9914   3
  -1  -9 -20 619.327 38.4237   3
  -1  -9 -21-14.7053 16.7528   3
  -1  -9 -22 21.1066 15.4290   3
  -1  -9 -23 32.9349 17.5102   3
  -1  -9 -24 152.505 25.3528   3
  -1  -9 -24 172.057 23.0912   2
  -1  -9 -25 84.7659 20.2447   2
  -1  -9 -25 65.3875 20.2130   3
  -1  -9 -26 104.917 21.7922   2
   1  10 -18 278.597 28.5737   2
  -1 -10  17 331.928 38.4061   1
   1  10 -17 315.939 28.9840   2
   1  10 -16 69.0864 18.2163   2
  -1 -10  16 95.4174 27.5449   1
  -1 -10  15 28.6821 21.2278   1
   1  10 -15 23.8776 14.6150   2
  -1 -10  14 169.541 29.8805   1
   1  10 -14 205.191 22.6043   2
   1  10 -13 297.875 25.4076   2
  -1 -10  13 225.617 30.8494   1
   1  10 -12 165.899 19.5951   2
  -1 -10  12 224.253 29.7960   1
   1  10 -11-4.04495 10.8020   2
  -1 -10  11-17.5818 18.3671   1
   1  10 -11-1.89564 9.00874   1
   1  10 -10 11.7243 10.3958   2
  -1 -10  10 1.50037 16.5023   1
   1  10 -10 4.47190 8.59587   1
   1  10  -9 209.252 19.6731   2
  -1 -10   9 219.775 27.1395   1
   1  10  -9 198.348 16.7033   1
   1  10  -8 1518.87 46.5775   2
  -1 -10   8 1434.86 59.4055   1
   1  10  -8 1365.82 39.5557   1
   1  10  -7 749.723 32.2793   2
  -1 -10   7 721.723 42.2232   1
   1  10  -7 754.448 30.3988   1
  -1 -10   6 155.404 24.0685   1
   1  10  -6 172.976 16.3716   1
   1  10  -6 165.083 16.3789   2
   1  10  -5 42.1584 10.2920   2
  -1 -10   5 57.0755 17.7581   1
   1  10  -5 51.1995 11.2077   1
   1  10  -4 166.313 16.0423   1
   1  10  -4 165.257 15.5445   2
  -1 -10   4 158.041 22.9314   1
  -1 -10   3 11.6426 15.1256   1
   1  10  -3 7.53062 8.86454   1
   1  10  -3 3.16588 7.40223   2
   1  10  -2 26.0232 10.0775   1
   1  10  -2 15.6279 7.44058   2
  -1 -10   2 14.6973 14.4741   1
   1  10  -1 9.07968 6.87819   2
  -1 -10   1 1.56473 12.6336   1
   1  10  -1 1.35180 8.55124   1
   1  10   0 31.8162 7.85525   2
   1  10   0 36.3504 10.1961   1
  -1 -10   0 31.6799 13.4010   1
   1  10   1 116.403 11.7095   2
  -1 -10  -1 145.232 21.1955   1
   1  10   1 127.336 14.1010   1
   1  10   2 608.821 27.0557   1
   1  10   2 520.618 21.3864   2
   1  10   3 693.385 28.5386   1
  -1 -10  -3 711.928 37.7873   1
   1  10   4 3570.71 62.3317   1
  -1 -10  -4 3515.19 80.1565   1
  -1 -10  -5 300.136 26.6162   1
   1  10   5 267.197 18.6493   1
   1  10   6 8.76170 8.28065   1
  -1 -10  -6 21.4499 12.7082   1
   1  10   7 236.727 17.4757   1
  -1 -10  -7 222.577 22.3765   1
   1  10   8 10.4902 8.53559   1
  -1 -10  -8 0.12723 12.6280   1
   1  10   9 7.16878 8.09256   1
  -1 -10  -9 27.4138 14.5125   1
   1  10  10 253.304 17.9647   1
  -1 -10 -10 194.983 20.4869   1
   1  10  11-10.9239 8.85067   1
  -1 -10 -11 15.8689 12.6910   1
   1  10  12 13.8533 8.70075   1
  -1 -10 -12 21.4343 13.0283   1
   1  10  13 1906.38 46.5665   1
  -1 -10 -13 2107.66 54.4642   1
  -1 -10 -14 201.605 17.6681   1
   1  10  14 215.623 17.8432   1
  -1 -10 -14 164.648 20.8183   3
  -1 -10 -15 126.451 18.9582   3
   1  10  15 92.6651 13.2654   1
  -1 -10 -16 47.5398 15.9097   3
   1  10  16 48.6008 11.7067   1
   1  10  17-10.1116 9.77815   1
  -1 -10 -17 4.54778 12.6213   3
   1  10  18 120.305 15.7351   1
  -1 -10 -18 125.318 20.6083   3
   1  10  19 50.5751 13.0867   1
  -1 -10 -19 61.1516 17.6333   3
  -1 -10 -20 60.5338 18.6362   3
  -1 -10 -21 56.3067 18.4444   3
  -1 -10 -22 39.4163 18.5460   3
  -1 -10 -23 44.6255 18.0575   3
  -1 -10 -24 118.580 24.8641   3
  -1 -10 -25 915.505 47.7804   2
  -1 -10 -25 895.418 52.5206   3
  -1 -10 -26 2.15919 16.3876   2
  -1 -11  17 138.885 33.7367   1
  -1 -11  16 39.6232 25.7641   1
  -1 -11  15 0.76411 22.0726   1
   1  11 -15 2.11346 14.3248   2
   1  11 -14-2.47306 12.9753   2
  -1 -11  14-1.96163 21.9909   1
   1  11 -13 296.362 26.6934   2
  -1 -11  13 293.559 35.8628   1
  -1 -11  12 747.940 51.0244   1
   1  11 -12 629.190 35.0367   2
  -1 -11  11 332.760 35.6250   1
   1  11 -11 422.033 28.9087   2
   1  11 -10 42.1748 12.0165   1
   1  11 -10 18.5120 10.9872   2
  -1 -11  10 34.7098 19.1487   1
   1  11  -9 55.1938 13.2396   2
   1  11  -9 72.2908 12.8759   1
   1  11  -8 293.556 20.8756   1
  -1 -11   8 300.205 31.6339   1
   1  11  -7 26.2696 11.7901   2
   1  11  -7 44.0283 11.2114   1
   1  11  -6 10.7561 9.65475   2
  -1 -11   6 30.2617 16.5330   1
   1  11  -6 6.62298 9.18940   1
   1  11  -5 67.3336 13.1964   1
   1  11  -5 58.2903 12.0933   2
  -1 -11   5 39.6350 17.4206   1
   1  11  -4 6.20717 8.61901   2
  -1 -11   4 19.9367 16.6493   1
   1  11  -4 11.3956 10.1921   1
   1  11  -3 561.740 26.4918   2
  -1 -11   3 594.941 39.7334   1
   1  11  -3 563.302 28.2463   1
   1  11  -2 566.634 28.0564   1
  -1 -11   2 656.051 40.5338   1
  -1 -11   1 329.106 30.5428   1
   1  11  -1 303.312 21.1399   1
   1  11   0 1015.71 36.6890   1
  -1 -11   0 1051.30 49.4342   1
  -1 -11  -1-14.7100 15.9407   1
   1  11   1-13.4774 10.6097   1
   1  11   2 60.8406 12.4123   1
  -1 -11  -2 102.745 20.3347   1
  -1 -11  -3 349.641 30.1350   1
   1  11   3 354.459 22.6473   1
   1  11   4 6.02511 9.60878   1
  -1 -11  -4 27.1161 16.9399   1
   1  11   5 8.50189 9.36675   1
  -1 -11  -5 23.0897 16.3206   1
  -1 -11  -6 24.5760 14.0800   1
   1  11   6 39.0328 10.6736   1
  -1 -11  -7 93.5731 18.7876   1
   1  11   7 91.7260 13.3756   1
  -1 -11  -8 207.324 23.9449   1
   1  11   8 194.407 17.5436   1
  -1 -11  -9 2532.78 71.2338   1
   1  11   9 2465.03 55.2247   1
   1  11  10 352.202 22.5365   1
  -1 -11 -10 378.427 29.3050   1
  -1 -11 -11 99.5466 18.2712   1
   1  11  11 71.2466 12.7123   1
  -1 -11 -12 51.9242 14.6296   1
   1  11  12 81.1545 12.8603   1
   1  11  13 10.3041 10.1053   1
  -1 -11 -13 2.42099 13.2475   1
   1  11  14 174.571 17.0528   1
  -1 -11 -14 142.913 18.3680   1
  -1 -11 -15 141.215 20.6881   3
  -1 -11 -15 148.100 16.3794   1
   1  11  15 130.767 16.0400   1
  -1 -11 -16 9.97822 13.8192   3
   1  11  16 28.9407 11.2880   1
  -1 -11 -17-11.3790 14.4382   3
   1  11  17-3.87481 9.96157   1
  -1 -11 -18 523.161 36.7385   3
   1  11  18 547.426 29.9254   1
  -1 -11 -19 173.042 24.2481   3
   1  11  19 226.186 21.0265   1
  -1 -11 -20 132.233 22.0382   3
  -1 -11 -21 354.712 33.7390   3
  -1 -11 -22-15.6411 19.9846   3
  -1 -11 -23 28.6556 18.6749   3
  -1 -11 -24 24.1901 19.0810   3
  -1 -11 -25 64.6491 23.8629   3
  -1 -12  15-5.59366 23.3197   1
  -1 -12  14 24.3545 22.5637   1
  -1 -12  13 201.694 33.0471   1
  -1 -12  12 350.294 41.3102   1
  -1 -12  11 0.48900 23.8050   1
  -1 -12  10 53.2719 24.8326   1
  -1 -12   9-9.14248 22.2703   1
   1  12  -9 23.5394 11.5176   1
  -1 -12   8 76.8071 22.7015   1
   1  12  -8 96.5699 14.5359   1
   1  12  -7 539.035 28.1806   1
  -1 -12   7 560.668 43.8599   1
   1  12  -6 681.327 31.4548   1
  -1 -12   6 771.217 49.7102   1
   1  12  -5 186.134 18.8099   1
  -1 -12   5 196.221 28.8026   1
  -1 -12   4 50.2969 19.9461   1
   1  12  -4 75.5678 13.7680   1
   1  12  -3 82.3568 14.1366   1
  -1 -12   3 148.992 25.5895   1
   1  12  -2 35.1864 11.6535   1
  -1 -12   2 42.0488 18.8508   1
  -1 -12   1 376.536 34.4391   1
   1  12  -1 317.611 22.7382   1
  -1 -12   0 60.6410 19.4888   1
   1  12   0 27.8942 12.3082   1
   1  12   1 27.4219 12.0751   1
  -1 -12  -1 27.8653 18.6797   1
  -1 -12  -2 29.4355 17.4492   1
   1  12   2 36.8876 11.6032   1
   1  12   3 398.643 24.8962   1
  -1 -12  -3 336.416 31.9532   1
  -1 -12  -4 395.766 33.9474   1
   1  12   4 367.349 24.1136   1
   1  12   5 1825.66 50.1626   1
  -1 -12  -5 1986.12 69.4390   1
   1  12   6 126.730 15.7711   1
  -1 -12  -6 148.475 23.3767   1
   1  12   7 8.41098 9.66431   1
  -1 -12  -7 12.1709 14.2752   1
  -1 -12  -8 411.119 33.3868   1
   1  12   8 407.168 24.9977   1
  -1 -12  -9 6.39025 15.6735   1
   1  12   9 7.96523 9.71481   1
   1  12  10 43.3471 11.9596   1
  -1 -12 -10 55.5515 18.5586   1
  -1 -12 -11 169.312 22.5121   1
   1  12  11 174.554 17.7581   1
  -1 -12 -12-14.3291 15.4580   1
   1  12  12 11.5274 10.4511   1
   1  12  13 71.1111 14.5012   1
  -1 -12 -13 71.0506 16.6852   1
   1  12  14 1321.68 44.2702   1
  -1 -12 -14 1344.25 48.8616   1
   1  12  15 290.975 22.5460   1
   1  12  16 141.436 17.9426   1
  -1 -12 -16 189.741 25.0938   3
  -1 -12 -17 83.3681 20.6111   3
   1  12  17 90.4463 15.7732   1
   1  12  18 32.1684 13.9634   1
  -1 -12 -18 13.7901 16.4826   3
   1  12  19 188.247 20.7930   1
  -1 -12 -19 155.437 24.6240   3
   1  12  20-2.66997 12.4156   1
  -1 -12 -20 32.3098 17.2505   3
  -1 -12 -21 27.6154 21.0612   3
  -1 -12 -22 10.9995 19.9265   3
  -1 -12 -23 56.2421 24.2426   3
  -1 -12 -24 136.517 28.0295   3
  -1 -12 -25 107.224 24.4005   3
  -1 -12 -26 779.732 52.9887   3
  -1 -13  13 6.09816 22.7166   1
  -1 -13  12 213.703 36.2022   1
  -1 -13  11 378.614 43.4486   1
  -1 -13  10 448.143 45.1536   1
  -1 -13   9 5.67749 22.9884   1
   1  13  -8 40.7213 12.8244   1
  -1 -13   8 1.50639 22.0692   1
   1  13  -7 259.973 22.0505   1
  -1 -13   7 298.241 35.7348   1
  -1 -13   6 0.23695 19.7786   1
   1  13  -6-4.76308 10.5659   1
  -1 -13   5 85.3413 24.6935   1
   1  13  -5 69.3361 14.4270   1
   1  13  -4 18.4529 11.7176   1
  -1 -13   4 47.5906 23.5200   1
  -1 -13   3 2.88121 19.7131   1
   1  13  -3 6.11740 11.1241   1
   1  13  -2 150.548 18.4493   1
  -1 -13   2 251.027 33.1317   1
   1  13  -1 634.341 32.5968   1
  -1 -13   1 662.678 47.0268   1
  -1 -13   0 321.052 34.8719   1
   1  13   0 359.084 25.2145   1
   1  13   1 707.856 34.1658   1
  -1 -13  -1 682.699 46.7511   1
  -1 -13  -2 56.1523 21.0949   1
   1  13   2 35.2829 12.6891   1
  -1 -13  -3 34.0158 21.0162   1
   1  13   3 13.5022 10.9469   1
   1  13   4 430.176 27.2828   1
  -1 -13  -4 524.620 40.4408   1
  -1 -13  -5 15.0476 16.5445   1
   1  13   5 22.1235 11.8232   1
   1  13   6-8.33459 11.2285   1
  -1 -13  -6-12.7654 17.9634   1
   1  13   7 59.1161 13.5879   1
  -1 -13  -7 52.2581 18.9200   1
  -1 -13  -8 51.2414 18.9761   1
   1  13   8 32.3606 12.4596   1
  -1 -13  -9 114.458 21.8178   1
   1  13   9 107.965 16.1808   1
  -1 -13 -10 2182.46 72.7423   1
   1  13  10 2125.15 57.1145   1
  -1 -13 -11 449.050 36.0517   1
   1  13  11 456.853 28.1198   1
  -1 -13 -12 61.7682 19.0749   1
   1  13  12 46.1734 13.4042   1
  -1 -13 -13 50.8813 17.1966   1
   1  13  13 16.3527 11.4337   1
  -1 -13 -14 18.6413 16.5183   1
   1  13  14-8.20142 11.4925   1
   1  13  15 158.870 18.9084   1
   1  13  16-4.77309 11.2005   1
  -1 -13 -16 7.93078 16.6716   3
   1  13  17 6.96103 11.0831   1
  -1 -13 -17-5.16526 16.7229   3
  -1 -13 -18 34.3119 18.6037   3
   1  13  18 38.0659 14.0680   1
  -1 -13 -19 232.207 29.0784   3
   1  13  19 208.291 22.0953   1
   1  13  20 261.392 25.2134   1
  -1 -13 -20 247.971 31.0034   3
  -1 -13 -21 144.063 27.1601   3
  -1 -13 -22 330.840 35.6159   3
  -1 -13 -23 43.1547 21.7284   3
  -1 -13 -24 62.8018 25.0314   3
  -1 -13 -25 61.3858 25.1033   3
  -1 -14  10 4.70889 27.5202   1
  -1 -14   9 23.7750 24.3352   1
  -1 -14   8 24.0351 26.5911   1
   1  14  -7 52.0884 14.2959   1
  -1 -14   7-1.08941 24.4706   1
  -1 -14   6 337.638 40.7971   1
   1  14  -6 343.723 25.6418   1
   1  14  -5 561.853 31.7836   1
  -1 -14   5 421.756 44.8398   1
  -1 -14   4 160.685 32.7589   1
   1  14  -4 113.380 17.6608   1
  -1 -14   3 0.24877 20.7814   1
   1  14  -3 75.3793 16.1137   1
  -1 -14   2 87.5210 25.0468   1
   1  14  -2 142.214 18.8230   1
   1  14  -1 74.7175 16.0276   1
  -1 -14   1 100.597 26.6837   1
   1  14   0 374.643 26.6240   1
  -1 -14   0 407.797 39.9837   1
   1  14   1 26.0013 13.2046   1
  -1 -14  -1 48.6110 21.1444   1
  -1 -14  -2 14.1365 19.7280   1
   1  14   2 25.0434 13.7023   1
   1  14   3-9.70899 12.4023   1
  -1 -14  -3 0.44560 19.2984   1
   1  14   4 281.564 24.3583   1
  -1 -14  -4 280.811 33.5159   1
  -1 -14  -5 109.695 26.1785   1
   1  14   5 211.619 22.1311   1
  -1 -14  -6 1685.60 71.5431   1
   1  14   6 1349.32 48.2201   1
   1  14   7 227.019 22.8140   1
  -1 -14  -7 271.386 31.5800   1
  -1 -14  -8 43.1568 22.0996   1
   1  14   8 10.0471 11.8916   1
   1  14   9 465.444 29.7949   1
  -1 -14  -9 446.408 38.2572   1
   1  14  10 101.620 16.8701   1
  -1 -14 -10 76.2015 22.4542   1
  -1 -14 -11 69.6570 20.0902   1
   1  14  11 158.402 20.4565   1
   1  14  12 74.1171 15.7372   1
  -1 -14 -12 100.513 22.8150   1
  -1 -14 -13 24.7883 19.6439   1
   1  14  13 1.27406 11.7993   1
   1  14  14-0.12986 10.7844   1
  -1 -14 -14 2.62827 16.4886   1
   1  14  15 677.252 36.5764   1
  -1 -14 -16 404.251 36.7111   3
   1  14  16 434.831 29.8620   1
   1  14  17 173.229 21.7340   1
  -1 -14 -17 163.258 26.8477   3
  -1 -14 -18 82.5833 23.9946   3
   1  14  18 95.2643 18.8086   1
   1  14  19-11.2577 14.6867   1
  -1 -14 -19 17.2502 17.6199   3
  -1 -14 -20 126.161 26.4655   3
   1  14  20 155.768 21.5926   1
  -1 -14 -21 16.3298 20.9289   3
  -1 -14 -22 12.5703 20.2114   3
  -1 -14 -23 13.7866 20.0473   3
  -1 -14 -24-3.30097 22.8272   3
  -1 -15   7 19.9976 28.4475   1
   1  15  -6 362.531 26.3581   1
  -1 -15   6 412.782 47.6171   1
  -1 -15   5 6.36809 22.7509   1
   1  15  -5 18.5274 13.1729   1
  -1 -15   4 177.435 33.7301   1
   1  15  -4 153.872 19.9284   1
   1  15  -3-0.12753 12.5843   1
  -1 -15   3-22.0390 26.5089   1
   1  15  -2-2.44883 12.6845   1
  -1 -15   2 18.7686 24.5965   1
  -1 -15   1 66.5929 27.1178   1
   1  15  -1 57.1033 15.2978   1
   1  15   0 452.131 30.2974   1
  -1 -15   0 456.037 45.1245   1
  -1 -15  -1 258.150 35.8994   1
   1  15   1 259.159 25.2843   1
  -1 -15  -2 603.978 49.4347   1
   1  15   2 478.969 31.7347   1
   1  15   3-3.46330 12.8959   1
  -1 -15  -3-4.98733 22.5160   1
   1  15   4 85.5028 17.3493   1
  -1 -15  -4 69.7444 24.8252   1
   1  15   5 465.457 31.5048   1
  -1 -15  -5 471.371 43.3484   1
   1  15   6 192.663 22.1043   1
  -1 -15  -6 169.216 29.6931   1
   1  15   7 14.9409 12.8030   1
  -1 -15  -7-5.53619 18.9387   1
   1  15   8-3.48372 12.3991   1
  -1 -15  -8 40.0374 22.7457   1
  -1 -15  -9 27.6153 20.0105   1
   1  15   9 21.8092 14.1256   1
  -1 -15 -10 30.8865 18.5058   1
   1  15  10 37.0133 15.2894   1
   1  15  11 1250.13 49.5977   1
  -1 -15 -11 1346.04 64.0555   1
  -1 -15 -12 543.175 41.6829   1
   1  15  12 492.287 32.3262   1
  -1 -15 -13 32.9351 20.2377   1
   1  15  13 29.6878 14.8629   1
   1  15  14 0.99981 12.7554   1
  -1 -15 -14 19.6820 17.0587   1
   1  15  15 52.3308 17.3131   1
  -1 -15 -16 280.843 33.9834   3
   1  15  16 275.730 26.0016   1
  -1 -15 -17-24.8288 18.9144   3
   1  15  17 33.3079 15.7803   1
   1  15  18-10.2111 14.8255   1
  -1 -15 -18 47.2883 22.3030   3
  -1 -15 -19-5.52040 21.8511   3
   1  15  19 43.6105 17.4466   1
  -1 -15 -20 102.674 26.7952   3
   1  15  20 80.3256 19.0532   1
  -1 -15 -21 194.852 31.7722   3
   1  15  21 167.012 24.3441   1
  -1 -15 -22 117.614 29.3662   3
   1  16  -5 71.5535 16.7884   1
   1  16  -4 450.616 31.2042   1
  -1 -16   4 408.591 48.4733   1
  -1 -16   3 119.794 31.9924   1
   1  16  -3 130.027 20.6868   1
   1  16  -2 76.3377 18.2210   1
  -1 -16   2 0.29727 23.9435   1
   1  16  -1 51.5079 16.1846   1
  -1 -16   1 53.1218 27.4107   1
  -1 -16   0 122.910 34.6685   1
   1  16   0 66.1432 17.5406   1
  -1 -16  -1 293.866 39.3511   1
   1  16   1 212.181 23.8969   1
   1  16   2 108.778 20.1986   1
  -1 -16  -2 63.1694 27.2982   1
   1  16   3 19.8506 14.9450   1
  -1 -16  -3 9.32360 24.6427   1
  -1 -16  -4 24.5674 22.1722   1
   1  16   4-2.45685 13.1625   1
   1  16   5 144.331 21.1333   1
  -1 -16  -5 163.634 31.6577   1
   1  16   6 81.9292 17.7786   1
  -1 -16  -6 78.2121 26.6167   1
  -1 -16  -7 887.148 58.3285   1
   1  16   7 800.724 41.8177   1
  -1 -16  -8 378.779 42.3987   1
   1  16   8 344.887 29.4644   1
   1  16   9 18.9285 15.5147   1
  -1 -16  -9-0.72948 19.9912   1
  -1 -16 -10 306.124 37.3354   1
   1  16  10 274.823 27.2543   1
  -1 -16 -11 176.470 32.4491   1
   1  16  11 155.142 21.6642   1
   1  16  12 130.124 21.3024   1
  -1 -16 -12 170.445 27.8496   1
   1  16  13 1.54054 13.2502   1
  -1 -16 -13 7.73137 20.4510   1
   1  16  14 1.71086 14.0661   1
   1  16  15 6.20222 13.5848   1
  -1 -16 -16 413.698 40.1166   3
   1  16  16 443.807 34.5424   1
   1  16  17 525.411 36.4763   1
  -1 -16 -17 390.399 39.6507   3
   1  16  18 166.744 24.4027   1
  -1 -16 -18 90.9545 28.9948   3
   1  16  19 52.6569 18.7925   1
  -1 -16 -19 64.4394 26.0609   3
  -1 -16 -20 3.34468 22.9370   3
   1  16  20 16.2538 16.6929   1
   1  17  -1-11.0391 15.6488   1
   1  17   0 30.8789 16.8242   1
   1  17   1 239.316 26.3697   1
  -1 -17  -1 324.540 45.1799   1
   1  17   2 103.164 19.7120   1
  -1 -17  -2 112.276 32.3982   1
   1  17   3 300.889 28.8593   1
  -1 -17  -3 260.942 39.2611   1
  -1 -17  -4 44.4762 26.4594   1
   1  17   4 41.0951 16.2808   1
  -1 -17  -5 53.1339 28.7041   1
   1  17   5 28.1516 15.9127   1
   1  17   6 308.958 29.3423   1
  -1 -17  -6 421.389 46.3475   1
   1  17   7 262.754 27.6416   1
  -1 -17  -7 256.745 39.5816   1
   1  17   8 12.4723 16.5053   1
  -1 -17  -8 39.6466 25.1478   1
   1  17   9-24.2221 17.4937   1
  -1 -17  -9 30.3811 24.1328   1
   1  17  10 6.68567 13.8391   1
  -1 -17 -10 18.7142 26.3140   1
  -1 -17 -11-4.72145 22.4205   1
   1  17  11-6.56508 14.3969   1
  -1 -17 -12 535.052 46.2315   1
   1  17  12 513.222 36.8308   1
   1  17  13 447.572 35.4890   1
   1  17  14 34.5369 16.2084   1
   1  17  15 17.9579 17.8619   1
   1  17  16 65.9177 20.1072   1
  -1 -17 -16 61.9864 25.9173   3
  -1 -17 -17 203.566 33.6731   3
  -1 -18  -8 530.634 52.2542   1
  -1 -18  -9 171.655 34.9390   1
  -1 -18 -10 17.1124 25.9399   1
  -1 -18 -11 59.7171 26.5147   1
   2 -17 -15 166.126 32.8310   1
   2 -17 -14 37.0905 25.6619   1
  -2  17  13 148.363 24.1662   1
   2 -17 -13 94.5404 30.4576   1
  -2  17  12 23.3202 17.6022   1
   2 -17 -12-4.15999 24.1581   1
  -2  17  11 22.2325 16.7459   1
   2 -17 -11-4.82768 24.7453   1
   2 -17 -10 15.9656 28.8839   1
  -2  17  10 36.7057 17.7597   1
  -2  17   9 300.831 30.0144   1
   2 -17  -9 269.823 41.0283   1
   2 -17  -8 224.106 37.8390   1
  -2  17   8 351.686 31.0124   1
   2 -17  -7 376.793 46.8254   1
  -2  17   7 335.299 31.6264   1
   2 -17  -6 38.4237 27.6816   1
  -2  17   6 59.2388 18.5671   1
   2 -17  -5-39.4090 30.0247   1
  -2  17   5-5.13469 14.9080   1
  -2  17   4 275.532 27.8584   1
   2 -17  -4 321.788 44.5371   1
   2 -17  -3 237.598 39.6570   1
  -2  17   3 247.885 26.2987   1
   2 -17  -2 51.0689 31.1292   1
  -2  17   2 11.2875 15.0977   1
  -2  17   1-16.3464 14.9144   1
  -2  17   0 11.8239 13.8231   1
  -2  17  -1 3.36586 13.4905   1
   2 -16 -20 3.14101 22.0190   3
   2 -16 -19 616.403 47.5584   3
  -2  16  18 21.3907 18.4910   1
  -2  16  17 71.1960 20.4097   1
   2 -16 -16 15.1390 20.2710   1
  -2  16  16 25.9683 17.3730   1
   2 -16 -15 6.98796 21.4825   1
  -2  16  15 21.7238 16.1525   1
  -2  16  14 55.5468 18.0291   1
   2 -16 -14 5.42555 22.5088   1
   2 -16 -13 458.709 44.5014   1
  -2  16  13 392.940 31.6392   1
  -2  16  12 208.299 24.7822   1
   2 -16 -12 186.363 31.9720   1
  -2  16  11 42.1006 16.5786   1
   2 -16 -11 90.5877 28.0816   1
   2 -16 -10 29.8609 24.5763   1
  -2  16  10 29.8180 16.7209   1
   2 -16  -9-7.07889 24.8569   1
  -2  16   9 24.4715 16.3348   1
  -2  16   8 269.337 26.9557   1
   2 -16  -8 311.612 41.2290   1
   2 -16  -7 151.713 33.0888   1
  -2  16   7 143.358 22.1514   1
  -2  16   6 3.95321 14.9510   1
   2 -16  -6-2.81608 23.7017   1
  -2  16   5-16.4649 15.2565   1
   2 -16  -5-31.8279 25.7634   1
   2 -16  -4 63.6797 26.9016   1
  -2  16   4 22.4980 14.8482   1
  -2  16   3 85.6804 18.6692   1
   2 -16  -3 65.5385 27.4039   1
   2 -16  -2 390.058 46.5507   1
  -2  16   2 415.002 30.1834   1
  -2  16   1 466.418 32.0538   1
   2 -16  -1 550.733 51.8089   1
   2 -16   0 117.996 33.0454   1
  -2  16   0 45.8040 15.5256   1
  -2  16  -1 117.301 18.6544   1
   2 -16   1 150.658 33.9637   1
  -2  16  -2 257.879 24.9280   1
   2 -16   2 224.749 38.4127   1
   2 -16   3 113.141 32.8505   1
   2 -15 -22-9.45222 21.4620   3
   2 -15 -21 53.7490 22.1350   3
   2 -15 -20 16.1262 19.7318   3
  -2  15  20 3.18224 15.1161   1
   2 -15 -19 231.396 30.9447   3
  -2  15  19 245.809 28.4737   1
  -2  15  18 41.9521 18.4429   1
  -2  15  17 687.931 40.9907   1
  -2  15  16 93.7745 19.8681   1
   2 -15 -16 124.857 28.0307   1
   2 -15 -15 4.26687 21.9005   1
  -2  15  15-6.04660 13.9138   1
   2 -15 -14 556.445 45.4468   1
  -2  15  14 429.473 32.0959   1
   2 -15 -13 34.1133 24.5487   1
  -2  15  13 0.59759 14.1410   1
   2 -15 -12 207.230 33.5735   1
  -2  15  12 263.147 26.4257   1
  -2  15  11 51.2893 16.0925   1
   2 -15 -11 138.587 30.3344   1
   2 -15 -10-20.9571 21.1789   1
  -2  15  10 10.2851 13.0938   1
   2 -15  -9 29.4123 24.0704   1
  -2  15   9 38.6294 15.0589   1
   2 -15  -8 204.384 33.6480   1
  -2  15   8 222.851 23.6137   1
  -2  15   7 228.953 23.6589   1
   2 -15  -7 224.983 34.4974   1
  -2  15   6 286.088 26.3320   1
   2 -15  -6 262.414 37.4788   1
  -2  15   5 52.2356 14.5401   1
   2 -15  -5 39.8266 23.4683   1
   2 -15  -4 39.8932 24.8609   1
  -2  15   4 12.8583 13.9204   1
   2 -15  -3 160.888 30.2607   1
  -2  15   3 208.960 22.7315   1
  -2  15   2 453.688 30.1400   1
   2 -15  -2 461.329 45.9315   1
  -2  15   1 30.2873 13.6982   1
   2 -15  -1 9.45285 22.9269   1
   2 -15   0-22.1901 22.8995   1
  -2  15   0 12.8429 12.3156   1
   2 -15   1-7.44847 23.8882   1
  -2  15  -1-4.24060 13.3246   1
  -2  15  -2-6.27431 13.7338   1
   2 -15   2-4.72780 24.1105   1
  -2  15  -3 396.458 27.4290   1
   2 -15   3 331.896 42.0159   1
   2 -15   4 734.553 56.9200   1
   2 -15   5 138.994 34.0012   1
   2 -15   6 15.8565 25.0383   1
   2 -15   7 144.116 34.3887   1
  -2  14  23 322.646 32.3039   1
   2 -14 -22 12.1032 21.2202   3
  -2  14  22 7.10043 16.9237   1
  -2  14  21 403.836 33.8246   1
   2 -14 -21 354.363 35.4314   3
  -2  14  20 52.3541 18.2487   1
   2 -14 -20 63.8637 22.4922   3
  -2  14  19 8.80609 15.8530   1
   2 -14 -19 30.6173 18.7920   3
  -2  14  18 1201.11 52.0343   1
   2 -14 -17 31.3138 20.6713   1
  -2  14  17 33.4654 15.6221   1
   2 -14 -16 212.344 29.6174   1
  -2  14  16 176.104 22.4179   1
   2 -14 -15 16.7940 19.9437   1
  -2  14  15-6.59941 14.3698   1
  -2  14  14 13.9143 13.3550   1
   2 -14 -14 39.0882 21.2139   1
   2 -14 -13 5.58850 18.4950   1
  -2  14  13 4.40247 12.4671   1
   2 -14 -12 300.944 34.1125   1
  -2  14  12 354.575 28.1351   1
  -2  14  11 296.435 25.4015   1
   2 -14 -11 244.845 32.7693   1
  -2  14  10 41.0655 14.2829   1
   2 -14 -10 22.0887 21.2383   1
  -2  14   9 19.7503 12.1479   1
   2 -14  -9 92.9778 25.7570   1
  -2  14   8 32.1123 14.5940   1
   2 -14  -8 27.1872 21.0283   1
   2 -14  -7 459.733 43.5396   1
  -2  14   7 392.282 28.5253   1
  -2  14   6 384.859 27.6358   1
   2 -14  -6 300.580 36.1033   1
  -2  14   5 5.09414 11.9889   1
   2 -14  -5-19.0023 22.3732   1
   2 -14  -4-3.07335 18.8489   1
  -2  14   4 35.9451 14.6639   1
   2 -14  -3-4.75184 20.6705   1
  -2  14   3 22.3717 12.3867   1
   2 -14  -2 40.3247 21.3506   1
  -2  14   2 31.3219 13.1210   1
   2 -14  -1 374.358 39.4198   1
  -2  14   1 393.762 26.9095   1
  -2  14   0 533.451 30.3527   1
   2 -14   0 532.312 46.5399   1
  -2  14  -1 21.5779 12.0051   1
   2 -14   1 22.6617 20.6215   1
   2 -14   2 107.030 27.8560   1
  -2  14  -2 130.732 18.1893   1
  -2  14  -3 473.345 27.7118   1
   2 -14   3 545.873 47.5594   1
  -2  14  -4 173.298 18.2330   1
   2 -14   4 169.279 30.7671   1
   2 -14   5 62.6232 27.3199   1
   2 -14   6-11.6296 23.5161   1
   2 -14   7 2.20085 22.9934   1
   2 -14   8 111.545 31.1039   1
   2 -14   9 636.304 54.6408   1
   2 -14  10 114.731 32.8504   1
  -2  13  24-3.80617 16.1938   1
  -2  13  23 49.3619 18.7575   1
  -2  13  22 1192.23 53.7793   1
   2 -13 -22 1149.56 56.7408   3
  -2  13  21-12.6301 17.0427   1
   2 -13 -21 11.2520 19.6863   3
   2 -13 -20 49.6810 20.7414   3
  -2  13  20 66.1157 16.9768   1
   2 -13 -19 25.8206 17.4334   3
  -2  13  19 49.9855 17.6881   1
  -2  13  18 222.541 24.8008   1
   2 -13 -18 172.525 25.3622   3
   2 -13 -17-4.10881 17.1405   1
  -2  13  17-0.28246 13.0639   1
   2 -13 -16 734.932 45.4241   1
  -2  13  16 723.532 37.9922   1
   2 -13 -15 150.225 24.8674   1
  -2  13  15 189.254 22.6604   1
   2 -13 -14 1.56704 17.3343   1
  -2  13  14 9.05297 11.6266   1
   2 -13 -13 558.937 41.9228   1
  -2  13  13 622.190 34.4781   1
   2 -13 -12 48.7259 21.4869   1
  -2  13  12 41.4583 13.4262   1
   2 -13 -11 478.736 40.4923   1
  -2  13  11 371.343 27.3762   1
   2 -13 -10 264.277 33.4092   1
  -2  13  10 276.073 23.3586   1
   2 -13  -9 15.9011 18.2368   1
  -2  13   9 28.9933 12.5847   1
  -2  13   8-4.70798 11.2233   1
   2 -13  -8 27.1306 20.0330   1
   2 -13  -7 177.928 28.1283   1
  -2  13   7 179.727 19.7949   1
  -2  13   6 160.704 18.6275   1
   2 -13  -6 153.328 27.4864   1
   2 -13  -5 127.750 26.7530   1
  -2  13   5 200.838 19.9765   1
  -2  13   4 224.607 21.1307   1
   2 -13  -4 130.831 26.3737   1
  -2  13   3-9.82213 11.3722   1
   2 -13  -3-11.9178 18.3768   1
  -2  13   2 392.273 25.6285   1
   2 -13  -2 522.074 42.0982   1
  -2  13   1 957.856 37.8998   1
   2 -13  -1 974.439 55.6756   1
   2 -13   0 123.094 25.9328   1
  -2  13   0 104.529 15.5588   1
  -2  13  -1 23.9897 11.0765   1
   2 -13   1 20.9694 20.9832   1
  -2  13  -2 12.1235 10.8929   1
   2 -13   2 15.1504 20.9107   1
  -2  13  -3 3.34221 9.92412   1
   2 -13   3 4.33813 19.9500   1
   2 -13   4 391.455 39.1041   1
  -2  13  -4 409.566 25.0520   1
  -2  13  -5 745.246 31.6357   1
   2 -13   5 714.740 50.8618   1
   2 -13   6 93.3672 25.2213   1
   2 -13   7 6.64648 19.5311   1
   2 -13   8 72.4166 24.7162   1
   2 -13   9 108.486 28.1844   1
   2 -13  10 18.7006 20.6131   1
   2 -13  11 55.3190 26.4372   1
   2 -13  12 30.8184 26.6007   1
   2 -12 -25 37.2167 20.4054   2
   2 -12 -24 43.7799 20.5606   2
  -2  12  24 23.4133 17.7895   1
  -2  12  23 63.0840 18.9715   1
  -2  12  22 242.036 26.3045   1
   2 -12 -22 219.916 27.7550   3
  -2  12  21 24.3111 15.0273   1
   2 -12 -21 55.4475 20.0496   3
  -2  12  20 411.368 30.6587   1
   2 -12 -20 392.867 33.5733   3
  -2  12  19 26.1778 14.9034   1
   2 -12 -19 45.3363 18.2277   3
  -2  12  18 30.2971 14.1186   1
   2 -12 -18 42.0642 16.8521   3
   2 -12 -17 1642.79 59.6954   1
  -2  12  17 1511.45 52.7714   1
  -2  12  16 61.3862 15.2082   1
   2 -12 -16 16.4605 15.6422   1
  -2  12  15 205.013 21.5407   1
   2 -12 -15 176.169 24.8817   1
  -2  12  14 13.4271 10.9052   1
   2 -12 -14 30.1423 17.7952   1
   2 -12 -13 8.60043 15.4054   1
  -2  12  13 35.2845 12.6424   1
   2 -12 -12 0.18212 18.0548   1
  -2  12  12-0.33944 10.6396   1
   2 -12 -11 533.455 39.4278   1
  -2  12  11 448.589 27.6002   1
  -2  12  10 488.164 28.7500   1
   2 -12 -10 570.626 41.0138   1
   2 -12  -9 94.9598 22.0633   1
  -2  12   9 60.7131 13.5009   1
  -2  12   8 11.7619 10.9198   1
   2 -12  -8 6.54673 18.8939   1
  -2  12   7 15.5295 11.3985   1
   2 -12  -7 16.3731 16.9004   1
  -2  12   6 306.918 22.1668   1
   2 -12  -6 335.541 33.5253   1
  -2  12   5 1289.19 42.2605   1
   2 -12  -5 1479.77 63.8806   1
  -2  12   4 11.3737 9.76806   1
   2 -12  -4 34.2184 18.3570   1
   2 -12  -3 11.5966 16.7252   1
  -2  12   3 0.96878 9.52911   1
   2 -12  -2-16.0181 18.4967   1
  -2  12   2-6.90687 8.78528   1
  -2  12   1 21.2342 10.0922   1
   2 -12  -1 7.60408 17.2094   1
   2 -12   0 128.014 24.7276   1
  -2  12   0 202.009 18.1357   1
   2 -12   1 660.529 44.0627   1
  -2  12  -1 620.425 29.3261   1
  -2  12  -1 646.400 27.7335   2
   2 -12   2 53.9009 20.5910   1
  -2  12  -2 56.9389 11.0814   2
  -2  12  -2 80.9309 13.4940   1
  -2  12  -3 86.5148 13.1152   2
  -2  12  -3 61.0156 12.0483   1
   2 -12   3 79.4451 22.4698   1
  -2  12  -4 899.341 34.5290   2
   2 -12   4 880.596 51.9226   1
  -2  12  -4 816.272 31.8255   1
  -2  12  -5 234.941 20.0020   2
   2 -12   5 304.444 34.5777   1
  -2  12  -5 288.220 20.0657   1
   2 -12   6 62.6215 20.3145   1
  -2  12  -6 45.8312 11.5930   2
  -2  12  -6 63.2482 12.4801   1
   2 -12   7-5.20375 19.1425   1
  -2  12  -7 7.29587 9.92793   2
  -2  12  -8 13.3291 11.1805   2
   2 -12   8 31.8575 20.9670   1
   2 -12   9-9.79688 21.1538   1
  -2  12  -9 8.47948 11.1904   2
   2 -12  10 456.414 42.3177   1
  -2  12 -10 392.322 27.0441   2
   2 -12  11 132.028 28.3815   1
  -2  12 -11 64.3430 15.3168   2
   2 -12  12 89.0325 25.2221   1
  -2  12 -12 182.953 20.3330   2
  -2  12 -13-10.3522 12.8238   2
  -2  12 -14 70.6930 16.5091   2
   2 -11 -26 271.078 32.7419   2
   2 -11 -25 109.359 23.8094   2
   2 -11 -24 78.2845 21.2990   2
  -2  11  23-0.15869 14.6421   1
  -2  11  22 22.7069 15.1643   1
   2 -11 -22 11.8761 17.0343   3
  -2  11  21 1494.08 55.3716   1
   2 -11 -21 1256.03 53.1722   3
  -2  11  20 11.6151 14.3775   1
   2 -11 -20 2.30542 14.2703   3
   2 -11 -19 71.0508 18.2914   3
  -2  11  19 99.2433 17.5006   1
  -2  11  18 83.7394 16.3286   1
   2 -11 -18 69.8122 17.8336   3
   2 -11 -18 32.2565 15.2237   1
   2 -11 -17 243.923 25.6596   1
  -2  11  17 191.123 21.3973   1
   2 -11 -17 185.022 23.5093   3
   2 -11 -16 21.1435 14.7619   1
  -2  11  16 14.1451 11.8392   1
   2 -11 -15 607.155 38.3798   1
  -2  11  15 572.787 30.8278   1
   2 -11 -14 151.409 22.9150   1
  -2  11  14 124.717 17.1234   1
   2 -11 -13 10.8622 15.0530   1
  -2  11  13 5.00908 10.4451   1
  -2  11  12 910.885 36.7080   1
   2 -11 -12 846.349 45.6133   1
  -2  11  11 105.210 15.3100   1
   2 -11 -11 58.9879 17.7711   1
   2 -11 -10 552.820 38.4172   1
  -2  11  10 554.932 28.3708   1
   2 -11  -9 666.406 41.1685   1
  -2  11   9 570.687 28.5926   1
  -2  11   8 22.3898 9.85254   1
   2 -11  -8 31.0575 18.5386   1
  -2  11   7-1.74139 9.21172   1
   2 -11  -7-8.27711 16.2199   1
   2 -11  -6 129.045 21.9780   1
  -2  11   6 95.5085 13.5910   1
   2 -11  -5 228.174 26.7005   1
  -2  11   5 183.425 17.1929   1
  -2  11   4 257.946 19.5474   1
   2 -11  -4 263.619 28.6844   1
  -2  11   3 455.839 24.5213   1
   2 -11  -3 443.167 34.7514   1
  -2  11   2 19.0918 9.53214   1
  -2  11   2 11.8811 7.52488   2
  -2  11   1 431.059 20.9447   2
  -2  11   1 499.758 25.0513   1
   2 -11  -1 440.991 34.6050   1
   2 -11   0 1815.08 65.6941   1
  -2  11   0 1849.56 46.1149   1
  -2  11   0 1706.95 41.0357   2
  -2  11  -1 94.5550 11.9412   2
  -2  11  -1 87.5698 12.5508   1
   2 -11   1 121.936 22.3513   1
  -2  11  -2 49.5380 10.8995   1
   2 -11   2 40.8570 17.6221   1
  -2  11  -2 40.0772 10.3353   2
   2 -11   3 28.1052 17.4144   1
  -2  11  -3 25.7741 9.31408   2
  -2  11  -3 21.0481 8.55779   1
  -2  11  -4 1.37332 7.77388   2
   2 -11   4 17.8706 17.5057   1
  -2  11  -4 14.8218 8.87167   1
  -2  11  -5 204.840 17.7224   2
   2 -11   5 198.344 26.9342   1
  -2  11  -5 180.813 15.5191   1
  -2  11  -6 933.341 31.2277   1
  -2  11  -6 901.433 34.6378   2
   2 -11   6 1003.79 51.8801   1
  -2  11  -7 88.5842 13.3693   2
  -2  11  -7 103.591 12.1037   1
  -2  11  -8 23.0075 10.1483   2
   2 -11   8 15.4410 17.4424   1
  -2  11  -9 253.030 21.2535   2
   2 -11   9 292.039 32.8634   1
  -2  11 -10 124.938 16.6433   2
   2 -11  10 220.938 29.1897   1
   2 -11  11 150.248 26.5032   1
  -2  11 -11 159.601 18.8027   2
   2 -11  12 156.530 26.3567   1
  -2  11 -12 186.579 20.1040   2
  -2  11 -13 49.8802 14.4309   2
   2 -11  13 59.3588 22.4450   1
  -2  11 -14 10.2194 12.3582   2
  -2  11 -15 113.139 18.7075   2
  -2  11 -16 5.51034 13.4605   2
   2 -10 -26 19.4835 18.9516   2
   2 -10 -25 866.316 50.8302   2
   2 -10 -24 0.57860 18.3762   2
  -2  10  23 20.8588 15.3273   1
   2 -10 -23-9.67966 15.5102   2
   2 -10 -22 82.5919 19.7511   3
  -2  10  22 87.3849 17.5235   1
  -2  10  21 305.676 26.8791   1
   2 -10 -21 246.321 26.5590   3
  -2  10  20 100.313 18.3320   1
   2 -10 -20 60.0020 15.8501   3
  -2  10  19 434.512 28.8626   1
   2 -10 -19 422.832 30.6583   3
   2 -10 -18 34.5423 12.6195   1
  -2  10  18 47.2075 14.2887   1
   2 -10 -18 27.8724 14.7323   3
   2 -10 -17 8.32198 13.3430   1
   2 -10 -17 49.4241 15.2855   3
  -2  10  17 37.1479 12.5832   1
   2 -10 -16 1673.21 55.9009   1
  -2  10  16 1665.08 50.5925   1
  -2  10  15 33.5653 11.4659   1
   2 -10 -15 50.0130 15.7211   1
   2 -10 -14 140.194 20.8871   1
  -2  10  14 130.599 15.8769   1
   2 -10 -13 159.959 23.5722   1
  -2  10  13 102.241 14.4802   1
   2 -10 -12 95.6172 20.3289   1
  -2  10  12 73.2269 12.6946   1
  -2  10  11 7.94450 8.92372   1
   2 -10 -11 14.3032 14.2069   1
   2 -10 -10 453.408 32.7825   1
  -2  10  10 424.222 23.8866   1
   2 -10  -9 292.089 28.2617   1
  -2  10   9 296.856 20.1274   1
   2 -10  -8 3.19150 13.6795   1
  -2  10   8 7.84553 8.76689   1
   2 -10  -7 3.47613 14.4939   1
  -2  10   7 6.69227 8.13971   1
   2 -10  -6 61.8421 17.5242   1
  -2  10   6 48.7496 10.9706   1
  -2  10   5 461.201 19.8997   2
   2 -10  -5 509.259 34.3185   1
  -2  10   5 518.212 24.5809   1
  -2  10   4 2795.23 47.1828   2
   2 -10  -4 2946.03 77.6078   1
  -2  10   4 2837.86 55.2150   1
  -2  10   3 75.9736 9.95902   2
   2 -10  -3 84.3936 19.0391   1
  -2  10   3 102.057 12.9210   1
   2 -10  -2 7.49244 12.8355   1
  -2  10   2 1.60756 8.10038   1
  -2  10   2-0.48344 5.77054   2
  -2  10   1-0.81281 6.20802   2
   2 -10  -1 14.5386 14.6401   1
  -2  10   1-1.58780 7.95019   1
  -2  10   0 7.09502 7.73821   1
   2 -10   0 8.05653 13.6890   1
  -2  10   0 15.3758 6.71442   2
  -2  10  -1 252.159 16.3217   2
  -2  10  -1 238.807 16.9577   1
   2 -10   1 248.376 25.5157   1
   2 -10   2 1173.77 50.5252   1
  -2  10  -2 1197.03 34.2009   2
  -2  10  -2 1097.47 33.3319   1
  -2  10  -3 48.4879 9.62525   2
  -2  10  -3 47.0522 10.0202   1
   2 -10   3 24.6478 14.5400   1
   2 -10   4 96.4081 18.9883   1
  -2  10  -4 107.780 12.6134   1
  -2  10  -4 76.5889 11.3949   2
  -2  10  -5 1327.20 38.2460   2
  -2  10  -5 1332.43 35.4747   1
   2 -10   5 1452.66 56.7903   1
  -2  10  -6 330.935 20.5418   2
  -2  10  -6 301.437 17.6065   1
   2 -10   6 366.651 31.2863   1
   2 -10   7 126.404 22.7805   1
  -2  10  -7 146.571 12.9457   1
  -2  10  -7 128.427 14.5957   2
   2 -10   8 52.8970 15.9128   1
  -2  10  -8 56.6229 9.48478   1
  -2  10  -8 56.6177 11.5403   2
  -2  10  -9 16.6493 10.0701   2
   2 -10   9 14.7874 15.4841   1
   2 -10  10 105.162 22.0839   1
  -2  10 -10 111.187 15.0606   2
   2 -10  11 634.145 43.1793   1
  -2  10 -11 507.732 28.2637   2
  -2  10 -12 35.3649 12.6139   2
   2 -10  12 34.5060 21.4829   1
   2 -10  13 173.156 27.1969   1
  -2  10 -13 176.795 19.5694   2
  -2  10 -14 3.18390 11.3977   2
  -2  10 -15 44.6868 14.2493   2
  -2  10 -16 163.851 19.9976   2
  -2  10 -17 231.469 24.3068   2
   2  -9 -27-39.7282 23.4695   2
   2  -9 -26 50.2009 18.1159   2
   2  -9 -25 240.672 29.6248   2
   2  -9 -24 119.156 23.8549   2
   2  -9 -23 80.7008 19.8646   2
  -2   9  23 72.0980 17.9289   1
   2  -9 -22-13.2051 15.2458   2
  -2   9  22-0.84025 12.7122   1
   2  -9 -21 29.9451 15.4971   3
  -2   9  21 24.8147 12.8657   1
  -2   9  20 2033.24 59.2504   1
   2  -9 -20 1918.46 59.7276   3
   2  -9 -19 2.26439 12.1610   3
  -2   9  19-7.06173 11.4814   1
  -2   9  18 67.2490 14.2600   1
   2  -9 -18 72.2071 14.3035   1
   2  -9 -18 68.5842 16.2460   3
   2  -9 -17 16.8111 11.3499   1
   2  -9 -17-1.87933 11.3214   3
  -2   9  17 9.85792 10.0171   1
   2  -9 -16 101.071 17.1418   1
  -2   9  16 97.4300 14.6519   1
   2  -9 -16 90.8152 16.4251   3
  -2   9  15 143.073 16.2049   1
   2  -9 -15 153.627 20.1925   1
   2  -9 -14 236.211 23.2718   1
  -2   9  14 286.331 20.7243   1
   2  -9 -13 137.118 19.0857   1
  -2   9  13 130.761 14.8650   1
   2  -9 -12 48.4033 15.0929   1
  -2   9  12 52.6974 11.7500   1
  -2   9  11 959.664 33.6681   1
   2  -9 -11 861.844 41.2395   1
  -2   9  10 86.3404 12.1974   1
   2  -9 -10 98.8162 17.7361   1
  -2   9   9 405.926 22.0050   1
   2  -9  -9 354.951 28.0529   1
   2  -9  -8 1731.80 57.3641   1
  -2   9   8 1677.64 41.9568   1
   2  -9  -7 24.0351 13.6984   1
  -2   9   7 12.4238 6.25805   2
  -2   9   7 16.0538 8.13281   1
  -2   9   6-4.17473 5.13609   2
   2  -9  -6-8.43253 13.6234   1
  -2   9   6-3.92407 7.71257   1
  -2   9   5 25.8667 8.78981   1
  -2   9   5 19.7652 5.95753   2
   2  -9  -5 44.2014 14.9951   1
  -2   9   4 92.0217 9.60756   2
   2  -9  -4 77.7081 17.3565   1
  -2   9   4 83.9076 11.2506   1
  -2   9   3 73.8979 10.5159   1
   2  -9  -3 86.5221 16.6499   1
  -2   9   3 113.852 10.1905   2
  -2   9   2 682.463 22.4764   2
   2  -9  -2 676.073 36.0910   1
  -2   9   2 613.028 24.3492   1
  -2   9   1 3.56397 5.57566   2
   2  -9  -1 13.7273 12.8093   1
  -2   9   1 3.95805 6.61481   1
  -2   9   0 278.672 15.6048   2
   2  -9   0 298.257 25.4358   1
  -2   9   0 295.145 17.5115   1
  -2   9  -1 3047.67 51.9237   1
  -2   9  -1 3106.58 50.0272   2
  -2   9  -2 175.220 13.2785   2
  -2   9  -2 161.102 13.4958   1
  -2   9  -3 18.6697 6.85506   2
   2  -9   3 11.3737 11.9573   1
  -2   9  -3 23.8944 8.02849   1
  -2   9  -4 12.6948 7.83096   2
  -2   9  -4 19.8999 8.02434   1
   2  -9   4 15.1205 13.2984   1
  -2   9  -5 13.0050 7.09436   1
   2  -9   5 5.43537 13.0117   1
  -2   9  -5 4.62550 7.20343   2
   2  -9   6 92.8878 17.3673   1
  -2   9  -6 75.2028 11.0444   2
  -2   9  -6 115.562 11.1900   1
   2  -9   7 1095.44 46.8314   1
  -2   9  -7 1169.75 29.7421   1
  -2   9  -7 1086.39 34.4443   2
   2  -9   8 36.6204 13.8195   1
  -2   9  -8 46.2650 9.98525   2
  -2   9  -8 59.2129 8.55068   1
  -2   9  -9-1.21579 7.88578   2
   2  -9   9-12.8470 14.2833   1
   2  -9  10 203.237 25.4832   1
  -2   9 -10 232.571 19.0726   2
   2  -9  11 134.557 22.2577   1
  -2   9 -11 124.846 15.8539   2
   2  -9  12 257.952 28.1330   1
  -2   9 -12 228.303 20.1021   2
  -2   9 -13 261.216 21.9551   2
   2  -9  13 220.007 27.8630   1
  -2   9 -14 19.9870 11.4536   2
  -2   9 -15-8.68490 12.6160   2
  -2   9 -16 102.677 16.5072   2
  -2   9 -17 25.0898 13.8028   2
  -2   9 -18 387.932 28.7323   2
   2  -8 -27 2.25624 18.6015   2
   2  -8 -26 19.2978 17.5619   2
   2  -8 -25 18.7676 15.3294   2
   2  -8 -24 1169.85 55.0202   2
   2  -8 -23 14.0909 16.3752   2
   2  -8 -22 19.3527 16.2788   2
  -2   8  22 5.64859 12.2497   1
  -2   8  21 112.288 16.8734   1
   2  -8 -21 135.164 20.6092   2
  -2   8  20 270.773 23.3594   1
   2  -8 -20 210.393 22.2535   3
   2  -8 -19 101.040 17.5821   3
  -2   8  19 155.673 18.7441   1
   2  -8 -18 411.489 22.7490   1
  -2   8  18 416.482 25.9140   1
   2  -8 -18 442.860 27.5956   3
   2  -8 -17 3.99380 10.1759   1
   2  -8 -17-2.58982 11.6704   3
  -2   8  17 12.4223 9.54253   1
  -2   8  16 27.1075 10.5421   1
   2  -8 -16 41.2773 13.2663   1
   2  -8 -16 12.7848 10.3635   3
  -2   8  15 1766.09 46.8757   1
   2  -8 -15 1703.55 48.6285   3
   2  -8 -15 1825.29 52.8171   1
  -2   8  14 158.380 15.7980   1
   2  -8 -14 182.090 19.7340   1
  -2   8  13 198.896 16.6294   1
   2  -8 -13 180.743 20.7466   1
   2  -8 -12 360.962 27.3542   1
  -2   8  12 409.137 21.7436   1
   2  -8 -11 57.4296 15.2739   1
  -2   8  11 60.0192 10.5415   1
  -2   8  10 19.7411 8.49117   1
   2  -8 -10 23.9005 12.3222   1
   2  -8  -9 15.1635 11.9600   1
  -2   8   9 48.6027 9.12088   1
   2  -8  -8 253.796 23.0952   1
  -2   8   8 242.861 16.2151   1
  -2   8   8 238.628 12.7376   2
  -2   8   7-0.32868 6.69477   1
  -2   8   7-2.23335 4.70633   2
   2  -8  -7 2.51911 11.3416   1
  -2   8   6 9.01960 5.86733   2
   2  -8  -6 9.03020 12.7552   1
  -2   8   6 7.48366 6.64326   1
  -2   8   5 24.8219 5.85288   2
  -2   8   5 43.9291 8.86727   1
   2  -8  -5 47.6023 13.6384   1
   2  -8  -4 384.399 26.2409   1
  -2   8   4 421.021 19.6181   1
  -2   8   4 419.421 16.3128   2
  -2   8   3 4696.26 53.1290   2
  -2   8   3 4575.90 61.3371   1
   2  -8  -3 4688.27 85.0853   1
   2  -8  -2 225.850 21.4486   1
  -2   8   2 213.490 14.3311   1
  -2   8   2 221.537 12.4161   2
   2  -8  -1 13.6585 10.7751   1
  -2   8   1 14.3893 5.55236   2
  -2   8   1 2.11618 6.29525   1
  -2   8   0-3.24359 6.67593   1
  -2   8   0 4.31298 4.92085   2
   2  -8   0 13.7049 10.3379   1
  -2   8  -1 3.86082 5.13211   2
   2  -8   1-8.21477 10.4443   1
  -2   8  -1-5.70683 6.25719   1
  -2   8  -2 272.556 15.5580   1
   2  -8   2 243.594 20.9593   1
  -2   8  -2 257.162 14.7541   2
  -2   8  -3 1347.04 32.3282   2
  -2   8  -3 1379.91 32.3511   1
   2  -8   3 1416.89 47.1015   1
  -2   8  -4 107.770 10.5758   1
  -2   8  -4 94.7893 10.4586   2
   2  -8   4 80.5760 14.8690   1
  -2   8  -5 42.2411 8.60238   2
   2  -8   5 57.6092 12.6604   1
  -2   8  -5 48.8473 8.25423   1
  -2   8  -6 2000.83 42.6120   2
  -2   8  -6 2006.75 36.9687   1
  -2   8  -7 334.836 15.4027   1
   2  -8   7 399.494 27.8037   1
  -2   8  -7 345.864 19.2231   2
  -2   8  -8 92.7430 11.7827   2
  -2   8  -8 98.5855 9.20853   1
   2  -8   8 68.4004 15.7420   1
   2  -8   9 172.871 21.0549   1
  -2   8  -9 190.016 15.4976   2
   2  -8  10 33.7152 15.1231   1
  -2   8 -10 10.3562 8.38056   2
  -2   8 -11 12.0473 8.40788   2
   2  -8  11-10.9480 13.2831   1
  -2   8 -12 345.269 22.2902   2
   2  -8  12 324.501 28.5441   1
   2  -8  13-23.2661 15.9957   1
  -2   8 -13 11.7713 10.4436   2
  -2   8 -14 91.9497 14.6580   2
  -2   8 -15 11.3004 11.2181   2
  -2   8 -16 33.7152 12.1874   2
  -2   8 -17 127.134 17.5441   2
  -2   8 -18 498.667 30.5688   2
  -2   8 -19 250.106 23.0085   2
   2  -7 -27-7.12318 19.5368   2
   2  -7 -26 18.8408 19.4352   2
   2  -7 -25 158.632 25.4549   2
   2  -7 -24 358.338 32.2361   2
   2  -7 -23 136.075 23.4385   2
   2  -7 -22 102.885 19.4089   2
  -2   7  22 124.180 19.5228   1
   2  -7 -21 15.0177 12.9908   2
  -2   7  21 44.7056 14.5534   1
  -2   7  20 7.89635 10.7858   1
   2  -7 -20 16.6732 13.1706   2
   2  -7 -20 4.15954 11.4687   3
   2  -7 -19 2340.86 59.5270   3
  -2   7  19 2330.92 58.9130   1
   2  -7 -19 2270.46 63.5627   2
  -2   7  18 8.22458 10.5105   1
   2  -7 -18-0.51847 10.7523   3
   2  -7 -17 8.54690 8.94151   1
  -2   7  17 9.54332 9.51409   1
   2  -7 -17 9.09046 9.44486   3
   2  -7 -16-9.60369 10.2257   1
   2  -7 -16-0.47160 9.58396   3
  -2   7  16 4.84524 8.98318   1
  -2   7  15 206.412 17.2730   1
   2  -7 -15 235.979 18.9757   3
   2  -7 -15 186.793 18.5541   1
   2  -7 -14 99.3160 15.3743   1
  -2   7  14 115.020 13.6514   1
   2  -7 -14 138.209 15.2192   3
   2  -7 -13 202.570 19.8791   1
  -2   7  13 178.113 15.3149   1
  -2   7  12 228.065 15.9454   1
   2  -7 -12 255.097 21.8081   1
  -2   7  11-0.54920 6.66223   1
   2  -7 -11 1.76064 10.7712   1
   2  -7 -10 431.733 27.2119   1
  -2   7  10 483.972 21.5563   1
  -2   7   9 21.1915 7.44172   1
   2  -7  -9 45.5598 12.6018   1
  -2   7   9 47.9350 6.48111   2
  -2   7   8 122.667 9.07080   2
  -2   7   8 135.588 12.2109   1
   2  -7  -8 165.870 18.4263   1
  -2   7   7 2523.71 36.7440   2
  -2   7   7 2493.47 44.3936   1
  -2   7   6 9.31670 6.18536   1
   2  -7  -6 24.7502 12.3334   1
  -2   7   6 15.1670 5.07749   2
   2  -7  -5 42.2141 11.4028   1
  -2   7   5 33.9333 7.74894   1
  -2   7   5 39.5646 5.97414   2
  -2   7   4 129.632 9.04924   2
  -2   7   4 108.251 10.3799   1
   2  -7  -4 105.514 15.3566   1
  -2   7   3 120.045 10.6729   1
   2  -7  -3 79.0568 13.6445   1
  -2   7   3 99.7551 8.18117   2
  -2   7   2 7.77887 6.24063   1
  -2   7   2 5.52980 4.27808   2
   2  -7  -2-1.14399 9.00203   1
  -2   7   1 727.332 22.7480   1
  -2   7   1 693.293 19.8616   2
   2  -7  -1 696.198 31.0116   1
  -2   7   0-0.10000 5.42377   1
   2  -7   0-9.53253 9.68992   1
  -2   7   0 7.88297 4.72830   2
   2  -7   1 422.901 24.8826   1
  -2   7  -1 432.675 16.8621   2
  -2   7  -1 437.053 17.7630   1
  -2   7  -2 8227.53 72.0896   2
  -2   7  -2 8324.06 73.2515   1
  -2   7  -3 518.195 19.0909   2
   2  -7   3 468.811 25.3948   1
  -2   7  -3 481.241 18.3271   1
  -2   7  -4 81.1191 8.78313   2
   2  -7   4 99.5370 14.0077   1
  -2   7  -4 104.002 9.68809   1
  -2   7  -5 8.86967 5.67998   1
   2  -7   5 2.12481 9.01937   1
  -2   7  -5 6.13332 6.08140   2
  -2   7  -6 11.8731 5.47483   1
  -2   7  -6 11.1976 5.91282   2
   2  -7   6 11.0920 10.5921   1
  -2   7  -7 90.3563 8.45355   1
   2  -7   7 91.9007 14.7405   1
  -2   7  -7 89.0625 10.6378   2
   2  -7   8 640.798 31.5593   1
  -2   7  -8 682.898 18.4794   1
  -2   7  -8 600.274 23.8203   2
  -2   7  -9 20.4963 8.19164   2
  -2   7  -9 46.3268 5.77589   1
   2  -7   9 29.1505 11.9344   1
  -2   7 -10 84.6062 11.9781   2
   2  -7  10 51.5660 12.7664   1
   2  -7  11 371.594 26.4085   1
  -2   7 -11 311.223 19.8511   2
  -2   7 -12 155.909 15.9385   2
   2  -7  12 114.750 17.8674   1
  -2   7 -13 161.860 16.3802   2
   2  -7  13 176.720 22.3390   1
  -2   7 -14 750.016 32.4033   2
  -2   7 -15 58.6160 12.9754   2
  -2   7 -16 19.6410 12.2282   2
  -2   7 -17 110.423 16.3921   2
  -2   7 -18 75.2416 15.4357   2
  -2   7 -19 280.040 24.8235   2
  -2   7 -20 196.784 21.8042   2
  -2   7 -21-3.77055 12.3353   2
   2  -6 -27 172.260 26.8917   2
   2  -6 -26-5.21127 16.8969   2
   2  -6 -25 21.1571 16.8933   2
   2  -6 -24 74.7494 19.8750   2
   2  -6 -23 1689.42 62.1430   2
   2  -6 -22 5.67095 13.3837   2
  -2   6  22 0.25735 12.1484   1
   2  -6 -21 9.79634 12.3776   2
  -2   6  21-0.96935 11.6754   1
   2  -6 -20 369.634 25.6883   3
   2  -6 -20 277.818 25.2872   2
  -2   6  20 332.588 24.7468   1
   2  -6 -19 190.559 21.3019   2
   2  -6 -19 155.454 17.3092   3
  -2   6  19 188.331 18.8914   1
   2  -6 -18 186.452 18.4524   3
   2  -6 -18 174.052 19.1610   2
  -2   6  18 143.196 16.3875   1
  -2   6  17 68.4088 12.4926   1
   2  -6 -17 80.0652 13.4575   3
   2  -6 -17 35.8166 9.22955   1
  -2   6  16 19.2848 9.34852   1
   2  -6 -16 20.5682 10.0033   1
   2  -6 -16 25.6570 9.76561   3
   2  -6 -15 5.36159 7.84987   3
   2  -6 -15 15.8465 9.17056   1
  -2   6  15-2.33672 7.70817   1
   2  -6 -14 2656.81 56.2516   1
  -2   6  14 2660.90 52.2462   1
   2  -6 -14 2619.80 52.5125   3
  -2   6  13 41.5835 9.21794   1
   2  -6 -13 37.6340 9.61741   3
   2  -6 -13 51.7679 11.2810   1
   2  -6 -12 80.1070 14.0035   1
  -2   6  12 68.2940 10.2015   1
  -2   6  11 470.892 20.8142   1
   2  -6 -11 453.348 25.8514   1
  -2   6  10 1.52941 3.99621   2
  -2   6  10 3.34353 6.07359   1
   2  -6 -10-0.58716 10.0609   1
  -2   6   9 36.2255 5.64533   2
   2  -6  -9 43.0963 11.9416   1
  -2   6   9 37.2423 7.54097   1
  -2   6   8 6.16682 3.99690   2
   2  -6  -8 12.9341 10.4653   1
  -2   6   8 9.32182 5.98744   1
  -2   6   7 116.280 8.17247   2
   2  -6  -7 110.594 15.3678   1
  -2   6   7 111.525 10.6748   1
   2  -6  -6 0.36712 9.33553   1
  -2   6   6 2.81935 3.75867   2
  -2   6   6 1.70297 5.48510   1
   2  -6  -5 86.4500 13.7722   1
  -2   6   5 79.9634 9.01068   1
  -2   6   5 77.2581 6.99547   2
   2  -6  -4 42.5415 11.7287   1
  -2   6   4 27.3574 4.98105   2
  -2   6   4 30.5815 6.71139   1
  -2   6   3 316.730 12.4690   2
   2  -6  -3 325.079 21.0403   1
  -2   6   3 332.276 15.0200   1
  -2   6   2 7838.14 68.1070   1
   2  -6  -2 7747.39 91.8541   1
  -2   6   2 7655.46 58.7644   2
  -2   6   1 173.705 11.1454   1
   2  -6  -1 191.181 16.2376   1
  -2   6   1 176.448 9.76074   2
  -2   6   0 0.59548 5.25128   1
   2  -6   0-10.7905 8.53110   1
  -2   6   0-3.38526 4.16677   2
  -2   6  -1 257.847 12.2915   2
  -2   6  -1 232.869 12.0848   1
   2  -6   1 242.165 17.5541   1
   2  -6   2 77.5314 11.9282   1
  -2   6  -2 64.6659 7.18080   2
  -2   6  -2 82.4156 8.02702   1
  -2   6  -3 45.0940 6.57507   1
   2  -6   3 38.3293 9.64290   1
  -2   6  -3 54.5284 7.02244   2
  -2   6  -4 1880.76 33.9956   2
   2  -6   4 1784.15 43.7811   1
  -2   6  -4 1862.96 31.1990   1
  -2   6  -5 105.724 8.29894   1
   2  -6   5 126.197 13.6193   1
  -2   6  -5 93.2545 9.28842   2
   2  -6   6 17.7279 8.92832   1
  -2   6  -6 15.5853 4.58706   1
  -2   6  -7 2323.51 31.5999   1
   2  -6   7 2320.69 52.0947   1
  -2   6  -7 2508.06 43.2005   2
  -2   6  -8 335.774 11.6859   1
  -2   6  -8 323.881 17.5156   2
   2  -6   8 345.934 21.5309   1
   2  -6   9 179.140 16.7281   1
  -2   6  -9 153.133 6.78519   1
  -2   6  -9 148.168 12.7612   2
  -2   6 -10 581.321 23.7579   2
   2  -6  10 572.978 28.6470   1
   2  -6  11 14.3071 10.0799   1
  -2   6 -11 1.58166 7.21547   2
  -2   6 -12 24.5581 8.61426   2
   2  -6  12 13.7758 10.6543   1
  -2   6 -13 197.998 16.7660   2
   2  -6  13 196.353 20.2298   1
  -2   6 -14 13.6773 8.88165   2
  -2   6 -15 217.090 18.1850   2
  -2   6 -16-2.02427 9.85751   2
  -2   6 -17 23.8406 10.4799   2
  -2   6 -18 148.681 17.4092   2
  -2   6 -19 850.299 37.3343   2
  -2   6 -20 248.533 22.8535   2
  -2   6 -21 1.97420 11.7583   2
  -2   6 -22 16.7719 13.8076   2
   2  -5 -27 710.741 46.1600   2
   2  -5 -26 6.88781 16.1851   2
   2  -5 -25 3.14318 14.9969   2
   2  -5 -24 322.740 30.7677   2
   2  -5 -23 233.474 25.7830   2
   2  -5 -22 335.845 29.5506   2
  -2   5  21 117.493 17.9176   1
   2  -5 -21 115.569 19.4296   2
   2  -5 -20 69.9444 16.4518   2
  -2   5  20 67.6496 14.3678   1
   2  -5 -19 48.9145 13.9388   2
  -2   5  19 48.4811 13.3641   1
   2  -5 -19 68.0813 13.1024   3
  -2   5  18 1997.43 51.8376   1
   2  -5 -18 1961.84 56.1389   2
   2  -5 -18 2004.75 50.1580   3
   2  -5 -17 60.6687 14.1323   2
   2  -5 -17 45.4378 11.6184   3
   2  -5 -17 33.1591 7.68092   1
  -2   5  17 47.9192 11.5655   1
   2  -5 -16-5.37339 9.76510   2
   2  -5 -16 3.54822 9.13733   3
   2  -5 -16 13.2419 7.67544   1
  -2   5  16 11.4603 8.43000   1
   2  -5 -15 36.8991 9.53232   1
   2  -5 -15 36.7788 9.68355   3
  -2   5  15 59.0755 10.9759   1
   2  -5 -14 261.939 17.7197   1
   2  -5 -14 251.338 17.0215   3
  -2   5  14 276.888 17.6101   1
  -2   5  13 104.417 11.2549   1
   2  -5 -13 81.1337 10.5885   3
   2  -5 -13 98.9542 13.0586   1
   2  -5 -12 98.1036 10.9321   3
  -2   5  12 120.939 11.3673   1
   2  -5 -12 106.199 13.2622   1
  -2   5  11 19.6221 6.72454   1
  -2   5  11 7.10105 3.80696   2
   2  -5 -11 11.7471 9.11136   1
  -2   5  10 17.7902 7.45551   1
   2  -5 -10 18.7913 10.0681   1
  -2   5  10 20.6029 4.59828   2
  -2   5   9 537.690 15.6890   2
   2  -5  -9 494.124 25.2348   1
   2  -5  -8 33.8061 10.7829   1
  -2   5   8 45.9917 7.66138   1
  -2   5   8 51.6898 5.61207   2
  -2   5   7 47.7026 7.00480   1
   2  -5  -7 61.6813 12.4624   1
  -2   5   7 48.3343 5.46818   2
  -2   5   6 4385.34 51.2092   1
  -2   5   6 4271.09 40.9198   2
   2  -5  -6 4271.73 68.2330   1
  -2   5   5 45.9499 6.99346   1
  -2   5   5 40.2807 4.89754   2
   2  -5  -5 59.6865 11.6103   1
  -2   5   4 3.37054 4.76267   1
  -2   5   4-1.48139 3.39602   2
   2  -5  -4-0.44578 8.04704   1
  -2   5   3 133.371 7.74028   2
  -2   5   3 136.951 9.58289   1
   2  -5  -3 153.258 14.1508   1
  -2   5   2 78.9016 6.25581   2
   2  -5  -2 66.9814 10.9329   1
  -2   5   2 77.4385 7.82906   1
   2  -5  -1 4.76355 8.40434   1
  -2   5   1 2.93306 4.41177   1
  -2   5   1 5.20163 3.53583   2
  -2   5   0 474.202 14.0658   2
  -2   5   0 468.162 15.4276   1
   2  -5   0 448.639 20.6290   1
  -2   5  -1 0.85846 3.66434   2
   2  -5   1 2.55885 7.00945   1
  -2   5  -1-0.03450 4.07977   1
  -2   5  -2 120.418 8.20394   1
  -2   5  -2 137.184 8.68383   2
   2  -5   2 117.161 11.6288   1
   2  -5   3 6949.25 76.0402   1
  -2   5  -3 7170.42 57.9351   2
  -2   5  -3 7203.64 55.7904   1
  -2   5  -4 202.847 11.0715   2
   2  -5   4 247.829 15.6399   1
  -2   5  -4 233.690 10.5109   1
   2  -5   5 9.62912 6.97937   1
  -2   5  -5 5.48300 3.59005   1
  -2   5  -5 8.71050 5.08962   2
  -2   5  -6 35.7750 6.98547   2
  -2   5  -6 29.4300 4.63791   1
   2  -5   6 36.4617 8.40624   1
   2  -5   7 20.0705 7.31319   1
  -2   5  -7 32.6129 4.64781   1
  -2   5  -7 25.5567 6.59915   2
  -2   5  -7 33.6090 5.48018   2
  -2   5  -8 42.0085 6.04553   2
  -2   5  -8 38.7619 3.87745   1
   2  -5   8 46.8760 9.53607   1
  -2   5  -8 29.0242 7.01536   2
   2  -5   9 582.948 25.1214   1
  -2   5  -9 512.388 20.3537   2
   2  -5  10 1.44325 7.22465   1
  -2   5 -10 7.43592 6.67773   2
   2  -5  11 24.0876 9.91855   1
  -2   5 -11 14.8049 7.16450   2
   2  -5  12 580.405 27.4361   1
  -2   5 -12 549.600 23.5390   2
  -2   5 -13 170.109 15.0608   2
   2  -5  13 181.712 17.4007   1
  -2   5 -14 118.266 13.4885   2
  -2   5 -15 1323.05 39.5778   2
  -2   5 -16 133.697 15.8070   2
  -2   5 -17 31.5020 10.9648   2
  -2   5 -18-13.4107 10.3859   2
  -2   5 -19 146.222 18.1062   2
  -2   5 -20 206.528 20.3775   2
  -2   5 -21 195.127 20.9086   2
  -2   5 -22 4.36171 11.2626   2
   2  -4 -27 146.565 25.4310   2
   2  -4 -26 187.037 26.3715   2
   2  -4 -25-6.91118 17.4893   2
   2  -4 -24 35.0067 17.6317   2
   2  -4 -23 226.144 25.7077   2
   2  -4 -22 2103.17 65.3337   2
   2  -4 -21-12.5245 14.9953   2
  -2   4  21 1.22195 12.4150   1
   2  -4 -20-5.93953 12.5845   2
  -2   4  20-4.60268 10.1949   1
   2  -4 -19 235.468 22.7656   2
  -2   4  19 217.504 19.7867   1
  -2   4  18 128.979 16.2153   1
   2  -4 -18 138.990 15.2317   3
   2  -4 -18 152.471 18.2373   2
   2  -4 -17 290.163 13.7188   1
  -2   4  17 342.920 21.9029   1
   2  -4 -17 265.622 21.9880   2
   2  -4 -17 323.243 20.1178   3
   2  -4 -16 44.3516 7.84088   1
   2  -4 -16 78.7761 14.0273   2
  -2   4  16 77.3040 11.6297   1
   2  -4 -16 65.4148 10.5807   3
  -2   4  15 7.08220 8.03779   1
   2  -4 -15-10.3673 10.0087   2
   2  -4 -15 5.95929 6.88966   1
   2  -4 -15 8.89794 8.05303   3
   2  -4 -14 17.4411 8.55657   1
   2  -4 -14 18.2769 8.33599   3
   2  -4 -14-9.19120 9.24658   2
  -2   4  14 9.99806 7.39588   1
   2  -4 -13 1829.04 41.1627   1
  -2   4  13 1899.10 41.0404   1
   2  -4 -13 1891.03 38.9157   3
   2  -4 -12 45.3816 10.0651   1
   2  -4 -12 22.8247 5.21290   2
   2  -4 -12 21.1476 7.40767   3
  -2   4  12 32.8941 7.48393   1
   2  -4 -11 3.33019 5.98692   3
   2  -4 -11-0.80826 9.02016   1
  -2   4  11 7.71996 6.44909   1
   2  -4 -11 4.31469 3.87725   2
  -2   4  10 1162.76 22.2915   2
   2  -4 -10 1066.11 33.5560   1
  -2   4  10 1169.95 28.8853   1
   2  -4  -9 85.0654 11.9590   1
  -2   4   9 82.8852 8.54992   1
  -2   4   9 49.8292 5.87674   2
   2  -4  -8 38.0317 10.7334   1
  -2   4   8 39.4742 6.61941   1
  -2   4   8 38.3246 5.14045   2
  -2   4   7 893.340 22.7164   1
  -2   4   7 850.032 17.7421   2
   2  -4  -7 814.747 29.3701   1
   2  -4  -6 87.8136 11.7365   1
  -2   4   6 95.1936 8.68406   1
  -2   4   6 89.7187 6.61904   2
   2  -4  -5-1.82616 7.77277   1
  -2   4   5 3.96888 3.12111   2
  -2   4   5 14.0177 5.03478   1
   2  -4  -4 170.671 14.4302   1
  -2   4   4 212.403 10.7841   1
  -2   4   4 198.917 8.45407   2
  -2   4   3 10.0141 4.67821   1
  -2   4   3 7.88588 3.11333   2
   2  -4  -3 7.96013 8.05701   1
  -2   4   2 36.5254 4.52091   2
   2  -4  -2 53.2730 9.36282   1
  -2   4   2 39.9861 5.76954   1
   2  -4  -1 5034.66 60.3682   1
  -2   4   1 4974.46 44.7144   1
  -2   4   1 4785.29 38.1558   2
  -2   4   0 88.0489 6.21364   2
  -2   4   0 112.281 7.58793   1
   2  -4   0 86.1926 9.82996   1
  -2   4  -1 6.49097 3.34688   2
  -2   4  -1 8.10013 4.30543   1
   2  -4   1-2.31181 5.61098   1
   2  -4   2 386.182 16.7040   1
  -2   4  -2 374.276 11.9578   2
  -2   4  -2 361.637 11.8537   1
   2  -4   3 35.6520 7.30088   1
  -2   4  -3 30.3956 4.60493   1
  -2   4  -3 36.6344 5.16756   2
  -2   4  -4 32.6993 4.98455   2
   2  -4   4 53.8224 7.71239   1
  -2   4  -4 37.6069 4.62431   1
  -2   4  -5 1725.29 28.5476   2
   2  -4   5 1640.29 33.7990   1
  -2   4  -5 1741.82 22.4605   1
  -2   4  -6 62.1791 4.64165   1
  -2   4  -6 49.4390 6.07898   2
   2  -4   6 61.8626 8.38330   1
  -2   4  -7 30.9896 3.11821   1
   2  -4   7 28.1966 7.16409   1
  -2   4  -7 33.1670 4.58710   2
  -2   4  -7 30.2870 5.93966   2
  -2   4  -8 3576.98 46.5327   2
  -2   4  -8 3808.93 38.8908   2
   2  -4   8 3624.06 52.7242   1
   2  -4   9 261.600 15.6354   1
  -2   4  -9 222.457 13.0647   2
  -2   4  -9 252.990 11.3031   2
   2  -4  10 90.8607 10.5803   1
  -2   4 -10 78.4203 7.54193   2
  -2   4 -10 81.6803 9.69423   2
   2  -4  11 876.027 29.1137   1
  -2   4 -11 864.960 26.5368   2
  -2   4 -12 6.33350 7.21286   2
   2  -4  12 4.92487 7.39004   1
  -2   4 -13 2.92289 7.03427   2
   2  -4  13 0.80282 8.60502   1
  -2   4 -14 83.1668 11.7238   2
  -2   4 -15 82.6875 11.6437   2
  -2   4 -16 257.413 18.8074   2
  -2   4 -17 46.2076 12.5211   2
  -2   4 -18 5.71436 9.05939   2
  -2   4 -19 77.9386 14.1153   2
  -2   4 -20 1498.97 47.2715   2
  -2   4 -21 264.773 22.9447   2
  -2   4 -22 20.4635 12.3670   2
  -2   4 -23-1.22604 12.4662   2
   2  -3 -27 197.687 27.3492   2
   2  -3 -26 741.342 44.4406   2
   2  -3 -25 8.37410 16.3244   2
   2  -3 -24 8.19847 15.0414   2
   2  -3 -23 438.097 32.9899   2
   2  -3 -22 383.998 30.3163   2
   2  -3 -21 312.905 26.7262   2
  -2   3  21 372.693 26.9871   1
   2  -3 -20 31.4743 14.1282   2
  -2   3  20 53.1100 13.8175   1
  -2   3  19 32.0751 12.5622   1
   2  -3 -19 18.5423 13.7456   2
  -2   3  18 115.863 15.4123   1
   2  -3 -18 135.777 14.8878   3
   2  -3 -18 126.979 18.1024   2
   2  -3 -17 2939.90 66.0330   2
   2  -3 -17 3069.80 56.0209   3
  -2   3  17 3127.78 61.9000   1
   2  -3 -16 18.5973 8.32792   3
   2  -3 -16 9.36341 5.93088   1
  -2   3  16-2.24586 8.96527   1
   2  -3 -16 9.57720 9.95647   2
   2  -3 -15 2.67488 6.09446   1
  -2   3  15 8.26156 8.84471   1
   2  -3 -15 5.90790 8.55851   2
   2  -3 -15 1.43101 6.68058   3
   2  -3 -14 66.5431 9.11388   1
   2  -3 -14 99.1319 11.0572   3
  -2   3  14 66.7210 10.6066   1
   2  -3 -14 84.4385 12.7388   2
   2  -3 -13 133.554 11.9977   1
   2  -3 -13 114.991 13.6320   2
   2  -3 -13 126.533 11.5777   3
  -2   3  13 144.842 12.9302   1
   2  -3 -12 138.816 12.5297   1
  -2   3  12 166.110 12.9167   1
   2  -3 -12 161.719 11.9110   3
   2  -3 -12 139.854 13.8830   2
   2  -3 -11 229.445 12.9085   3
  -2   3  11 229.137 13.9033   1
   2  -3 -11 200.746 14.4882   1
   2  -3 -10 92.0997 11.7913   1
  -2   3  10 83.6571 8.75109   1
   2  -3 -10 86.2962 8.50312   3
   2  -3 -10 99.0755 7.36500   2
  -2   3   9 49.9377 7.21504   1
   2  -3  -9 39.4603 5.43567   2
  -2   3   9 46.2410 5.41284   2
   2  -3  -9 62.4290 10.3482   1
   2  -3  -9 43.1262 6.72649   3
   2  -3  -8 694.529 25.4786   1
  -2   3   8 706.742 16.0360   2
  -2   3   8 677.550 19.9973   1
  -2   3   7 30.3195 4.75873   2
   2  -3  -7 46.3786 9.91360   1
  -2   3   7 48.8220 6.79038   1
  -2   3   6 0.88108 2.76530   2
   2  -3  -6-6.13580 7.76954   1
  -2   3   6 0.10702 4.63447   1
   2  -3  -5 3392.75 52.1492   1
  -2   3   5 3398.08 38.8230   1
  -2   3   5 3416.98 32.1686   2
  -2   3   4 0.30385 3.13362   2
   2  -3  -4 2.71317 7.39554   1
  -2   3   4 1.73399 4.31058   1
  -2   3   3 1.41920 4.36126   1
  -2   3   3 2.69406 2.89760   2
   2  -3  -2 476.966 18.5327   1
  -2   3   2 481.937 11.2360   2
  -2   3   2 496.490 13.8646   1
   2  -3  -1-0.43077 6.98273   1
  -2   3   1 3.49686 2.87165   2
  -2   3   1-5.75002 4.30139   1
  -2   3   0 1.47298 3.44114   1
  -2   3   0 4.83264 3.04196   2
   2  -3   0-3.01155 5.80054   1
   2  -3   1 194.766 11.1971   1
  -2   3  -1 167.389 7.22369   2
  -2   3  -1 194.254 8.12578   1
  -2   3  -2 4.37824 3.24740   1
  -2   3  -2 5.71705 3.21454   2
   2  -3   2 8.62498 5.01874   1
   2  -3   3 1.18424 4.18170   1
  -2   3  -3 14.1588 3.85727   2
  -2   3  -3 14.8540 3.23293   1
  -2   3  -4 5114.09 32.0479   1
  -2   3  -4 4908.83 40.6847   2
   2  -3   4 5031.33 48.3484   1
   2  -3   5 173.225 10.0714   1
  -2   3  -5 184.494 5.66190   1
  -2   3  -5 149.883 8.24092   2
   2  -3   6 13.1601 5.02402   1
  -2   3  -6 21.9264 4.80340   2
  -2   3  -7 77.7105 7.22379   2
   2  -3   7 96.6442 8.48357   1
  -2   3  -7 88.0108 5.72202   2
   2  -3   8 39.4021 6.25421   1
  -2   3  -8 28.2087 5.66354   2
  -2   3  -8 24.9897 4.02867   2
  -2   3  -9 0.78033 3.48160   2
   2  -3   9-4.97275 5.08732   1
  -2   3  -9 6.31421 4.82832   2
  -2   3 -10 107.470 7.66655   2
  -2   3 -10 134.549 10.7064   2
   2  -3  10 125.772 10.6669   1
  -2   3 -11 2.00112 6.21588   2
   2  -3  11 2.44637 5.90423   1
  -2   3 -11 5.48842 4.05807   2
   2  -3  12 45.7854 9.03874   1
  -2   3 -12 68.7871 7.33654   2
  -2   3 -12 43.0111 8.31642   2
  -2   3 -13 310.135 17.3046   2
   2  -3  13 288.483 17.7227   1
  -2   3 -14 52.4568 10.1586   2
  -2   3 -15 135.093 13.5213   2
  -2   3 -16 1953.37 45.7771   2
  -2   3 -17 89.5667 13.0435   2
  -2   3 -18-4.11962 9.43439   2
  -2   3 -19-4.09743 10.1467   2
  -2   3 -20 239.512 20.8673   2
  -2   3 -21 217.459 21.0264   2
  -2   3 -22 120.413 17.6369   2
  -2   3 -23 2.60841 11.5374   2
  -2   3 -24 9.08996 12.3102   2
   2  -2 -27 401.796 34.8763   2
   2  -2 -26 102.041 21.8856   2
   2  -2 -25 155.294 23.8906   2
   2  -2 -24 10.8385 14.8360   2
   2  -2 -23 139.961 22.9531   2
   2  -2 -22 286.731 26.7040   2
   2  -2 -21 2066.40 63.0282   2
   2  -2 -20 19.6566 13.7079   2
  -2   2  20 31.7234 12.6611   1
   2  -2 -19 3.16243 12.0904   2
  -2   2  19 1.43184 10.1750   1
  -2   2  18 302.460 21.9102   1
   2  -2 -18 320.214 24.4378   2
   2  -2 -17 395.242 20.8033   3
   2  -2 -17 332.813 23.9822   2
  -2   2  17 422.440 24.3169   1
   2  -2 -16 227.688 16.3383   3
   2  -2 -16 238.175 12.0230   1
   2  -2 -16 233.998 19.7813   2
  -2   2  16 239.936 18.5596   1
   2  -2 -15 8.42026 7.45935   3
   2  -2 -15 1.48841 5.51147   1
  -2   2  15 6.75933 8.15811   1
   2  -2 -15 12.6297 10.6196   2
   2  -2 -14 13.5649 6.45274   1
   2  -2 -14-0.60801 8.69034   2
   2  -2 -14 6.91841 6.70689   3
  -2   2  14 8.20291 7.26012   1
   2  -2 -13 2.22006 7.67972   2
   2  -2 -13 7.60118 6.32670   3
  -2   2  13 8.52122 7.52792   1
   2  -2 -13-2.11138 5.89787   1
  -2   2  12 1999.62 40.5903   1
   2  -2 -12 1908.96 34.7605   3
   2  -2 -12 1953.63 43.7700   2
   2  -2 -12 1961.09 38.3274   1
  -2   2  11 33.3351 7.87409   1
   2  -2 -11 31.4765 6.60240   3
   2  -2 -11 22.6515 7.81555   2
   2  -2 -11 31.2673 7.46125   1
  -2   2  10 32.6437 6.63790   1
   2  -2 -10 11.0125 6.66938   2
   2  -2 -10 20.5381 5.27088   3
   2  -2 -10 20.5911 7.49098   1
   2  -2  -9 2335.58 41.9991   2
  -2   2   9 2441.47 29.9796   2
   2  -2  -9 2335.36 42.2372   1
  -2   2   9 2296.78 37.8438   1
   2  -2  -9 2399.86 30.5863   2
   2  -2  -9 2288.83 31.6385   3
   2  -2  -8 70.9091 9.72597   1
  -2   2   8 64.3589 7.78401   1
  -2   2   8 67.4630 5.57030   2
   2  -2  -8 67.8348 6.29737   3
   2  -2  -8 43.2837 7.72025   2
   2  -2  -8 67.8574 5.89261   2
  -2   2   7 2.64206 4.54450   1
  -2   2   7 5.74399 3.25324   2
  -2   2   6 1359.65 19.8435   2
  -2   2   6 1285.59 24.5397   1
   2  -2  -6 1333.02 31.9845   1
  -2   2   5 30.5584 3.75488   2
  -2   2   5 26.2936 5.42704   1
   2  -2  -5 37.5413 8.87543   1
  -2   2   4 17.0421 4.67767   1
  -2   2   4 17.4524 3.36450   2
   2  -2  -4 10.6973 7.58108   1
  -2   2   3 10.3077 3.01406   2
  -2   2   3 8.11298 4.42189   1
  -2   2   2 2.38416 2.49350   2
   2  -2  -2-1.91658 6.41718   1
  -2   2   2 4.08534 4.20681   1
  -2   2   1 33.7518 4.68751   1
   2  -2  -1 45.7574 7.11087   1
  -2   2   1 31.0679 3.47620   2
  -2   2   0 17603.1 63.9423   1
  -2   2   0 17639.8 54.7176   2
   2  -2   0 17449.9 82.8828   1
   2  -2   1 97.6882 6.99219   1
  -2   2  -1 97.9881 5.29770   1
  -2   2  -1 83.8397 4.60684   2
  -2   2  -2 5.20653 2.53329   2
   2  -2   2 6.32921 4.03484   1
  -2   2  -2 9.36103 2.66136   1
  -2   2  -2 9.94118 3.14542   1
  -2   2  -3 151.889 4.40095   1
   2  -2   3 149.389 7.26956   1
  -2   2  -3 139.785 6.08709   2
   2  -2   4 10.0123 3.74855   1
  -2   2  -4 10.7308 3.17255   2
   2  -2   5 40.6782 4.61138   1
  -2   2  -5 33.0761 4.20786   2
  -2   2  -6 229.564 9.42524   2
   2  -2   6 241.865 9.32969   1
   2  -2   7 12.4705 3.78261   1
  -2   2  -7 15.9236 4.49847   2
  -2   2  -7 14.0639 2.74475   2
  -2   2  -8 9.31990 2.87096   2
   2  -2   8-1.18479 3.81505   1
  -2   2  -8-1.19672 3.90691   2
  -2   2  -9 2045.43 31.8309   2
   2  -2   9 2079.30 31.0984   1
  -2   2  -9 2028.27 25.1925   2
   2  -2  10 87.9637 7.89570   1
  -2   2 -10 89.1625 6.41115   2
  -2   2 -10 97.8483 8.76308   2
   2  -2  11 16.9219 5.94699   1
  -2   2 -11 25.4039 6.32506   2
  -2   2 -11 33.5523 4.88656   2
  -2   2 -12 1088.63 27.6930   2
  -2   2 -12 1110.38 22.0505   2
   2  -2  12 1036.26 26.8545   1
  -2   2 -13 2.92440 6.39481   2
  -2   2 -13-1.81633 4.07442   2
   2  -2  13 4.62495 5.97763   1
  -2   2 -14 11.9401 4.75963   2
  -2   2 -14 3.15678 6.60035   2
  -2   2 -15 38.4989 8.58140   2
  -2   2 -16 230.170 16.5057   2
  -2   2 -17 169.008 15.4945   2
  -2   2 -18 84.4482 13.0848   2
  -2   2 -19 15.4709 10.6158   2
  -2   2 -20 50.3625 11.9717   2
  -2   2 -21 1677.51 49.0309   2
  -2   2 -22 257.137 22.1051   2
  -2   2 -23-16.7066 12.1968   2
  -2   2 -24-8.52307 11.7173   2
  -2   2 -25 242.950 23.2101   2
   2  -1 -26 377.147 33.5369   2
   2  -1 -25 586.191 40.2192   2
   2  -1 -24-0.64835 14.3270   2
   2  -1 -23 2.30332 14.7506   2
   2  -1 -22 492.256 33.3488   2
   2  -1 -21 191.879 22.7952   2
   2  -1 -20 188.082 21.2986   2
  -2   1  20 145.595 19.1381   1
   2  -1 -19-0.73905 10.6220   2
  -2   1  19-10.4238 11.2964   1
  -2   1  18 50.0565 12.4649   1
   2  -1 -18 40.2391 13.4369   2
  -2   1  17 202.652 18.3265   1
   2  -1 -17 155.865 17.5050   2
   2  -1 -16 2726.82 50.3770   3
  -2   1  16 2786.22 58.3563   1
   2  -1 -16 2766.50 61.2394   2
   2  -1 -16 2616.01 33.5582   1
   2  -1 -15-3.83990 6.98143   3
  -2   1  15-8.79393 8.52224   1
   2  -1 -15-0.88179 5.25113   1
   2  -1 -15-2.98200 9.65575   2
   2  -1 -14 34.1535 9.93090   2
   2  -1 -14 37.8248 8.38654   3
  -2   1  14 63.0645 11.4602   1
   2  -1 -14 54.7386 8.21924   1
  -2   1  13 70.2802 10.4369   1
   2  -1 -13 86.7294 12.1408   2
   2  -1 -13 83.4123 9.04704   3
   2  -1 -13 74.6572 8.56855   1
   2  -1 -12 172.148 14.6402   2
   2  -1 -12 176.658 11.8474   1
   2  -1 -12 152.145 10.7991   3
  -2   1  12 147.956 12.7407   1
  -2   1  11 41.9819 7.89808   1
   2  -1 -11 57.1583 9.64640   2
   2  -1 -11 68.2504 8.86504   1
   2  -1 -11 41.5477 6.56209   3
   2  -1 -10 375.894 17.4043   1
   2  -1 -10 389.532 19.0884   2
   2  -1 -10 349.223 13.3209   3
  -2   1  10 369.683 17.0316   1
   2  -1  -9 87.5527 6.93220   3
   2  -1  -9 84.1940 9.74006   1
  -2   1   9 72.8062 5.88681   2
   2  -1  -9 60.7633 9.07075   2
  -2   1   9 73.8624 8.49534   1
  -2   1   8 97.8083 9.09577   1
   2  -1  -8 66.2377 8.73236   1
   2  -1  -8 65.0597 5.91008   3
  -2   1   8 78.1939 6.02330   2
   2  -1  -8 78.0292 9.26111   2
   2  -1  -8 84.9718 6.24177   2
   2  -1  -7 32.7631 6.76179   2
   2  -1  -7 36.9492 4.62308   2
  -2   1   7 41.7812 4.84858   2
   2  -1  -7 50.9021 8.67547   1
  -2   1   7 49.2735 6.99456   1
   2  -1  -7 35.3507 4.55794   3
   2  -1  -6 24.3383 3.55070   3
  -2   1   6 26.0417 5.84962   1
   2  -1  -6 20.3020 7.06048   1
   2  -1  -6 19.4917 6.05977   2
  -2   1   6 21.0974 3.60640   2
  -2   1   5 74.4263 5.13886   2
  -2   1   5 68.0041 7.04209   1
   2  -1  -5 77.6495 7.92677   2
   2  -1  -5 80.0619 9.56330   1
  -2   1   4 6612.04 38.4192   2
   2  -1  -4 6185.64 51.7427   2
  -2   1   4 6331.30 48.5366   1
   2  -1  -4 6351.30 60.2147   1
   2  -1  -3 10.6239 4.68840   2
   2  -1  -3 5.74092 6.46066   1
  -2   1   3 9.08047 4.61675   1
  -2   1   3 7.23824 2.61517   2
  -2   1   2 3.93992 2.35415   2
   2  -1  -2 0.47027 5.98098   1
  -2   1   2 2.11804 3.65047   1
   2  -1  -2 5.10726 4.11960   2
   2  -1  -1 3021.57 34.2108   1
  -2   1   1 3031.19 26.4868   1
  -2   1   1 3126.19 20.9336   2
   2  -1  -1 3094.78 28.6510   2
   2  -1   0 9.77874 4.21372   1
  -2   1   0 11.4342 2.00044   2
  -2   1   0 11.0221 2.92724   1
   2  -1   0 14.5145 3.44121   2
   2  -1   1 11.6648 3.27132   1
  -2   1  -1 13.7207 2.49269   1
  -2   1  -1 14.2428 1.92582   2
   2  -1   2 609.304 9.18538   1
  -2   1  -2 529.785 7.95195   2
  -2   1  -3 10.1484 6.37202   3
  -2   1  -3 8.88336 2.14598   2
  -2   1  -4-1.44823 2.32029   2
  -2   1  -4 1.64958 6.50070   3
   2  -1   5 3376.96 19.3414   1
  -2   1  -5 3474.97 24.5827   2
  -2   1  -5 3339.22 46.1435   3
  -2   1  -6 13.6738 7.37788   3
   2  -1   6 18.1894 2.44073   1
  -2   1  -6 18.4659 3.38301   2
  -2   1  -7 15.8045 2.25043   2
  -2   1  -7 14.2217 3.79005   2
   2  -1   7 12.9884 2.84869   1
  -2   1  -7 17.1514 7.97761   3
  -2   1  -8 63.0630 5.83519   2
  -2   1  -8 61.1033 3.99629   2
  -2   1  -8 66.2156 10.2260   3
   2  -1   8 62.2013 4.74394   1
   2  -1   9 18.2862 3.57919   1
  -2   1  -9 21.7223 3.31519   2
  -2   1  -9 21.6310 8.06518   3
  -2   1  -9 24.4303 4.93441   2
  -2   1 -10 25.1012 5.31413   2
  -2   1 -10 30.1105 3.95921   2
  -2   1 -10 41.8712 9.85710   3
   2  -1  10 30.7891 5.02515   1
  -2   1 -11 8.52621 3.36282   2
  -2   1 -11 11.3946 5.16399   2
   2  -1  11 4.77889 3.94901   1
  -2   1 -11 11.7880 8.97613   3
  -2   1 -12 21.7606 6.63857   2
   2  -1  12 34.1328 5.80000   1
  -2   1 -12 29.2807 4.69494   2
  -2   1 -12 47.0092 11.8197   3
   2  -1  13 86.5427 9.01652   1
  -2   1 -13 68.8313 8.97741   2
  -2   1 -13 70.3467 13.2206   3
  -2   1 -13 82.3117 5.99573   2
  -2   1 -14 169.627 9.39341   2
  -2   1 -14 133.343 11.7438   2
  -2   1 -15-10.5769 7.84112   2
  -2   1 -15 8.96408 5.19827   2
  -2   1 -16 58.6685 10.9365   2
  -2   1 -17 2590.66 51.1301   2
  -2   1 -18 125.567 14.2420   2
  -2   1 -19 28.1283 10.1342   2
  -2   1 -20 48.2287 12.6316   2
  -2   1 -21 275.988 21.6643   2
  -2   1 -22 216.349 20.0771   2
  -2   1 -23 125.347 16.9084   2
  -2   1 -24-1.76126 12.3662   2
  -2   1 -25 2.83514 12.8479   2
   2   0 -26 549.570 40.0268   2
   2   0 -25 155.929 23.6558   2
   2   0 -24 177.118 24.3074   2
   2   0 -23-5.11810 14.1967   2
   2   0 -22 33.6668 15.8751   2
   2   0 -21 379.279 29.5773   2
   2   0 -20 1409.36 50.7992   2
  -2   0  20 1299.53 48.6980   1
  -2   0  19-12.9508 12.1043   1
   2   0 -19 30.1835 13.2079   2
   2   0 -18 20.1062 11.1684   2
  -2   0  18 9.94045 11.0012   1
   2   0 -17 327.556 23.6615   2
  -2   0  17 390.315 25.5658   1
   2   0 -16 387.519 24.7369   2
  -2   0  16 416.866 24.6192   1
   2   0 -16 356.527 12.3405   1
  -2   0  15 137.745 14.4126   1
   2   0 -15 142.650 9.63169   1
   2   0 -15 172.102 17.1432   2
  -2   0  14 81.5273 12.1295   1
   2   0 -14 57.4706 9.35841   3
   2   0 -14 49.4872 7.61824   1
   2   0 -14 62.9901 11.9250   2
  -2   0  13 5.40278 8.04060   1
   2   0 -13 17.1599 6.14770   1
   2   0 -13-4.39533 9.33474   2
   2   0 -13-2.16532 7.28922   3
  -2   0  12 4.59261 6.66242   1
   2   0 -12 9.32928 5.69933   1
   2   0 -12 1.12393 6.30947   3
   2   0 -12 5.59549 8.29099   2
  -2   0  11 1216.04 32.2154   1
   2   0 -11 1326.02 29.5261   1
   2   0 -11 1350.16 35.6664   2
   2   0 -11 1289.45 27.2316   3
  -2   0  10 21.3410 7.07076   1
   2   0 -10 17.5591 4.89255   3
   2   0 -10 21.6988 6.32849   1
   2   0 -10 25.0975 8.05843   2
  -2   0   9 347.748 16.6176   1
   2   0  -9 288.663 15.8884   2
   2   0  -9 322.505 15.4530   1
   2   0  -9 311.347 11.8269   3
  -2   0   8 3505.76 35.4870   2
   2   0  -8 3248.69 46.1814   1
   2   0  -8 3299.61 33.0240   3
  -2   0   8 3307.27 45.8942   1
   2   0  -8 3370.78 48.5687   2
   2   0  -7 12.5618 3.52760   3
  -2   0   7 12.1717 5.76739   1
   2   0  -7 15.6244 6.16669   2
   2   0  -7 11.9530 5.89603   1
  -2   0   7 21.2622 4.14002   2
   2   0  -7 20.9562 4.03743   2
  -2   0   6 20.2166 5.64467   1
   2   0  -6 26.1491 3.93907   2
   2   0  -6 9.37807 6.25039   1
   2   0  -6 12.3717 6.24136   2
  -2   0   6 18.3451 3.46638   2
   2   0  -6 23.0040 3.39964   3
  -2   0   5 1857.02 29.4566   1
   2   0  -5 1949.09 33.3586   1
  -2   0   5 2021.43 23.3915   2
   2   0  -5 1844.58 15.4750   3
   2   0  -5 1850.71 31.2877   2
   2   0  -4 81.3736 7.89125   2
  -2   0   4 84.7626 7.58730   1
  -2   0   4 80.7350 5.25484   2
   2   0  -4 86.5352 8.70258   1
  -2   0   3 57.5489 6.43084   1
  -2   0   3 61.0396 4.28869   2
   2   0  -3 52.4357 6.31079   2
   2   0  -3 54.3967 7.44001   1
  -2   0   2 11.0281 4.22847   1
  -2   0   2 10.7611 2.63359   2
   2   0  -2 20.0339 5.89959   1
   2   0  -2 13.3329 4.43398   2
   2   0  -1-0.62442 3.30144   2
  -2   0   1-0.41830 1.91579   2
  -2   0   1 4.22467 2.64218   3
  -2   0   1 3.51442 3.72925   1
   2   0  -1-2.31631 4.73214   1
  -2   0   0 6.32033 1.79231   2
   2   0   0 2.19285 2.62938   2
  -2   0   0 6.93637 2.65927   1
   2   0   0 5.76935 4.03985   1
  -2   0   0 2.21694 2.93516   3
  -2   0  -1 15618.2 62.5060   3
  -2   0  -1 15343.0 44.4947   2
  -2   0  -1 15611.0 32.3969   2
  -2   0  -2 2.12746 4.66106   3
  -2   0  -3 36.6737 6.17964   3
  -2   0  -4 362.829 14.0412   3
  -2   0  -5 6.44056 5.90074   3
  -2   0  -6 13.4735 6.56849   3
  -2   0  -7 3.05369 2.55009   2
  -2   0  -7 5.47237 1.71563   2
  -2   0  -8-2.15425 6.48373   3
   2   0   8 2.86291 1.63006   1
  -2   0  -8 0.80457 1.82242   2
  -2   0  -8 1.06285 3.23999   2
   2   0   9 4.80681 2.25853   1
  -2   0  -9-0.22504 1.96127   2
  -2   0  -9-3.65849 3.56982   2
  -2   0 -10 1921.17 28.1601   2
  -2   0 -10 2004.32 43.4011   3
   2   0  10 2127.65 24.1707   1
  -2   0 -10 2026.99 21.5818   2
  -2   0 -11-1.74307 8.04197   3
  -2   0 -11-1.19102 4.57048   2
   2   0  11 0.60889 3.25855   1
  -2   0 -11 2.29026 2.89994   2
   2   0  12 0.61767 3.89565   1
  -2   0 -12 13.3225 9.39556   3
  -2   0 -12-1.62825 5.27087   2
  -2   0 -12 1.38834 2.94085   2
  -2   0 -13 1485.14 31.1705   2
  -2   0 -13 1454.56 22.8059   2
   2   0  13 1481.28 28.1233   1
  -2   0 -13 1477.07 43.2347   3
  -2   0 -14 6.52995 6.34136   2
  -2   0 -14 4.89706 3.55998   2
  -2   0 -14 8.18656 11.2474   3
  -2   0 -15-1.44446 3.93553   2
  -2   0 -15 10.0704 11.0988   3
  -2   0 -15 2.98762 6.75106   2
  -2   0 -16 269.726 23.5836   3
  -2   0 -16 244.307 16.2979   2
  -2   0 -17 184.471 15.4163   2
  -2   0 -17 202.436 21.6061   3
  -2   0 -18 169.724 22.2980   3
  -2   0 -18 192.950 15.7915   2
  -2   0 -19 59.6774 11.6303   2
  -2   0 -20 14.5635 10.3922   2
  -2   0 -21 56.9095 13.5007   2
  -2   0 -22 1887.19 51.6656   2
  -2   0 -23 152.714 18.1722   2
  -2   0 -24 4.51035 11.3408   2
  -2   0 -25-7.91376 12.6251   2
  -2   0 -26 200.414 22.8220   2
   2   1 -26 82.3916 21.0175   2
   2   1 -25 404.281 33.5728   2
   2   1 -24 513.785 36.2836   2
   2   1 -23-5.89227 14.8613   2
   2   1 -22-7.36177 14.0070   2
   2   1 -21 558.365 34.4251   2
   2   1 -20 228.313 23.2685   2
  -2  -1  20 254.907 24.4829   1
  -2  -1  19 169.665 19.5644   1
   2   1 -19 123.107 17.7898   2
  -2  -1  18 85.5653 15.7371   1
   2   1 -18 89.9099 15.8234   2
   2   1 -17 30.5929 11.9391   2
  -2  -1  17 43.4109 12.6533   1
  -2  -1  16 102.338 15.2175   1
   2   1 -16 67.2159 13.9078   2
   2   1 -15 1695.04 28.9693   1
  -2  -1  15 1682.22 46.8123   1
   2   1 -15 1614.39 46.4286   2
   2   1 -14 66.0875 12.4282   2
  -2  -1  14 51.0033 10.9709   1
   2   1 -14 60.6943 7.57277   1
   2   1 -13 283.009 14.0716   1
  -2  -1  13 260.664 18.3025   1
   2   1 -13 274.928 19.0694   2
   2   1 -12 152.964 14.4129   2
   2   1 -12 158.376 11.3669   1
  -2  -1  12 185.043 15.2929   1
   2   1 -11 174.036 14.6245   2
   2   1 -11 172.319 11.9282   1
  -2  -1  11 196.055 14.7740   1
   2   1 -10 9.25847 6.87855   2
  -2  -1  10-3.12529 6.67791   1
   2   1 -10 16.1506 6.81326   1
  -2  -1   9 1981.29 39.4527   1
   2   1  -9 1971.34 40.2408   2
   2   1  -9 2005.70 36.0696   1
   2   1  -8 69.7180 8.92307   1
   2   1  -8 71.8796 9.38731   2
  -2  -1   8 81.7164 6.50041   2
   2   1  -8 94.9354 7.20140   2
  -2  -1   8 71.6007 9.15526   1
   2   1  -7 33.4604 7.31395   2
   2   1  -7 58.3453 8.16951   1
   2   1  -7 42.1785 5.10599   2
  -2  -1   7 49.7316 5.16137   2
  -2  -1   7 69.4831 8.56745   1
   2   1  -6 251.112 13.4534   2
  -2  -1   6 259.619 13.3034   1
  -2  -1   6 246.285 9.43185   2
   2   1  -6 260.637 13.4158   1
   2   1  -5 19.4164 5.61049   2
  -2  -1   5 23.8135 3.89366   2
  -2  -1   5 19.0834 5.82136   1
   2   1  -5 17.6245 6.01500   1
  -2  -1   4 375.690 13.8940   1
   2   1  -4 396.003 15.4878   1
  -2  -1   4 393.738 10.7727   2
   2   1  -4 339.447 13.5825   2
   2   1  -3 10987.4 71.5827   1
  -2  -1   3 11014.2 51.4829   2
   2   1  -3 10757.5 65.3105   2
  -2  -1   3 11122.4 64.9069   1
   2   1  -2 9.54991 5.71629   1
  -2  -1   2 9.84342 4.65636   1
  -2  -1   2 7.71517 2.81276   2
   2   1  -2 9.44858 4.49826   2
  -2  -1   1 30.6517 4.89666   1
   2   1  -1 36.2347 5.66632   1
  -2  -1   1 31.4694 4.67213   2
  -2  -1   1 33.4280 2.79503   3
  -2  -1   1 27.3385 3.18083   2
   2   1  -1 36.9464 4.52966   2
   2   1   0 1875.28 23.8555   1
  -2  -1   0 1958.29 20.8498   1
  -2  -1   0 1966.97 17.9099   3
   2   1   0 1916.59 19.2899   2
  -2  -1   0 1866.18 16.1129   2
  -2  -1  -1 7.47566 1.71560   2
  -2  -1  -1 5.15856 2.31247   2
  -2  -1  -1 11.6177 3.73770   3
  -2  -1  -1 8.61580 2.66334   1
  -2  -1  -1 4.70343 3.45005   1
   2   1   1 11.3429 3.69567   1
  -2  -1  -2 4.61772 1.31661   2
  -2  -1  -2 5.27825 4.15792   3
  -2  -1  -2 5.70454 1.57707   2
  -2  -1  -3 347.910 12.0175   3
  -2  -1  -4 6.50053 5.36578   3
  -2  -1  -5 46.5774 7.13649   3
  -2  -1  -6 6044.75 58.1834   3
  -2  -1  -7 25.3861 1.89804   2
  -2  -1  -7 26.9633 6.67313   3
  -2  -1  -8 35.3826 2.57534   2
  -2  -1  -8 23.7880 7.23252   3
  -2  -1  -9 483.350 8.93071   2
   2   1   9 488.645 8.16869   1
  -2  -1  -9 434.936 19.5889   3
   2   1  10 38.0119 3.43612   1
  -2  -1 -10 43.2599 3.62441   2
  -2  -1 -10 46.2279 9.16774   3
   2   1  11 32.2526 3.96029   1
  -2  -1 -11 40.4278 3.83956   2
  -2  -1 -11 30.2876 5.41884   2
  -2  -1 -12 24.1037 9.07961   3
  -2  -1 -12 14.0267 5.40355   2
  -2  -1 -12 19.0838 3.56852   2
   2   1  12 16.1032 3.92193   1
  -2  -1 -13 71.1222 12.3508   3
   2   1  13 64.5784 6.43157   1
  -2  -1 -13 81.6238 8.66149   2
  -2  -1 -13 75.0064 5.75474   2
  -2  -1 -14 47.9274 5.48646   2
  -2  -1 -14 53.6723 12.0771   3
  -2  -1 -14 50.9513 8.78631   2
  -2  -1 -15 108.823 7.83770   2
  -2  -1 -15 128.601 11.8137   2
  -2  -1 -15 111.389 15.3181   3
  -2  -1 -16 26.2232 5.53252   2
  -2  -1 -16 30.0753 8.26106   2
  -2  -1 -16 22.0161 12.0868   3
  -2  -1 -17 7.21512 7.99482   2
  -2  -1 -17 7.01976 11.4885   3
  -2  -1 -18 2347.05 49.6132   2
  -2  -1 -18 2217.22 62.1258   3
  -2  -1 -19 74.7710 17.1749   3
  -2  -1 -19 81.2189 12.7515   2
  -2  -1 -20-3.20563 14.4465   3
  -2  -1 -20 10.7282 10.3391   2
  -2  -1 -21 158.599 23.1913   3
  -2  -1 -21 206.906 18.2121   2
  -2  -1 -22 259.239 21.3058   2
  -2  -1 -23 262.791 22.7458   2
  -2  -1 -24 103.979 16.1392   2
  -2  -1 -25 58.4853 14.7701   2
  -2  -1 -26-17.3606 14.8741   2
   2   2 -25 444.136 35.8007   2
   2   2 -24 188.333 25.3388   2
   2   2 -23 59.1587 16.1749   2
   2   2 -22-1.07867 14.3691   2
   2   2 -21 24.1367 14.1453   2
   2   2 -20 350.668 28.0099   2
  -2  -2  19 886.103 41.3079   1
   2   2 -19 891.740 40.5249   2
   2   2 -18 3.00397 11.0171   2
  -2  -2  18 6.29758 10.6458   1
   2   2 -17 52.7331 13.9495   2
  -2  -2  17 22.5055 11.9409   1
   2   2 -16 195.149 19.0441   2
  -2  -2  16 206.133 19.5430   1
  -2  -2  15 294.494 21.5244   1
   2   2 -15 309.932 13.0805   1
   2   2 -15 301.927 13.1305   1
   2   2 -15 297.552 21.6587   2
   2   2 -14 60.5385 7.70366   1
   2   2 -14 30.2705 10.6592   2
  -2  -2  14 56.9247 11.8658   1
  -2  -2  13 716.714 29.5301   1
   2   2 -13 797.828 23.0440   1
   2   2 -13 750.505 30.5744   2
   2   2 -12 3.40273 5.47386   1
  -2  -2  12 11.4103 7.97093   1
   2   2 -12 4.77468 8.31490   2
   2   2 -11 2.35397 5.76866   1
   2   2 -11-8.23134 7.42497   2
  -2  -2  11-3.48947 7.61520   1
   2   2 -10 718.363 26.2633   2
  -2  -2  10 765.731 27.0079   1
   2   2 -10 804.621 23.8573   1
   2   2  -9 6.00494 3.93012   2
  -2  -2   9-1.61329 6.65163   1
   2   2  -9 4.39486 5.57893   1
   2   2  -9-6.68802 7.01128   2
  -2  -2   8 386.051 18.0701   1
   2   2  -8 359.561 13.0087   2
   2   2  -8 341.458 16.9939   2
  -2  -2   8 372.919 13.0598   2
   2   2  -8 373.544 16.7510   1
  -2  -2   7 3614.95 38.0226   2
   2   2  -7 3455.40 49.2058   2
   2   2  -7 3472.67 47.4326   1
  -2  -2   7 3320.93 48.3170   1
  -2  -2   6 13.1149 6.06495   1
   2   2  -6 9.53299 6.21688   1
  -2  -2   6 15.7864 4.32252   2
   2   2  -6 11.6549 5.42170   2
   2   2  -5 22.5920 6.62005   1
  -2  -2   5 19.1935 6.25503   1
   2   2  -5 14.8153 5.67158   2
  -2  -2   5 7.97587 3.47586   2
  -2  -2   4 6853.15 60.4370   1
   2   2  -4 7018.37 61.4158   1
  -2  -2   4 6739.41 46.5197   2
  -2  -2   3 287.175 12.6698   1
   2   2  -3 243.474 12.2038   1
   2   2  -3 228.956 11.0138   2
  -2  -2   3 277.844 9.51349   2
  -2  -2   2 32.2995 4.10132   2
   2   2  -2 39.0474 6.80724   1
   2   2  -2 33.6400 5.21865   2
  -2  -2   2 23.5317 5.97142   1
  -2  -2   1 56.2495 6.80997   1
   2   2  -1 58.5070 7.08057   1
  -2  -2   1 70.6733 4.91459   2
   2   2  -1 47.5818 5.43607   2
  -2  -2   0 6.69901 2.76820   2
   2   2   0 1.67473 4.43340   1
  -2  -2   0 5.64752 4.53145   1
  -2  -2   0 4.94305 3.61010   2
   2   2   0 5.44385 3.11123   2
  -2  -2  -1 97.6504 4.99203   2
   2   2   1 134.959 7.55312   1
  -2  -2  -1 129.796 7.28822   1
   2   2   1 109.965 5.35067   2
  -2  -2  -2 8709.83 44.7190   1
   2   2   2 8868.47 47.5853   1
  -2  -2  -2 8826.50 38.7283   2
  -2  -2  -2 9139.95 53.0038   3
   2   2   3 7.21029 3.20345   1
  -2  -2  -3 8.52090 2.15289   2
  -2  -2  -3 7.16861 4.86134   3
  -2  -2  -3 9.20372 2.20377   2
  -2  -2  -4 1.01626 1.54045   2
  -2  -2  -4-4.02670 4.84342   3
  -2  -2  -4 3.12595 1.71974   2
   2   2   4-1.46263 2.46873   1
  -2  -2  -5 341.493 5.95039   2
  -2  -2  -5 322.537 13.5756   3
  -2  -2  -6 19.5827 6.01669   3
  -2  -2  -6 20.5685 2.01517   2
  -2  -2  -7 26.9019 7.81801   3
  -2  -2  -7 21.7113 2.29933   2
   2   2   7 19.6759 2.09560   1
   2   2   8 3.83000 1.83344   1
  -2  -2  -8-0.10811 1.73229   2
  -2  -2  -9-4.27751 6.76275   3
  -2  -2  -9-0.94625 2.11513   2
   2   2   9 0.91157 1.88730   1
   2   2  10 17.7346 2.86898   1
  -2  -2 -10 5.91512 6.56281   3
  -2  -2 -10 12.6236 2.72479   2
  -2  -2 -11 1195.82 17.0910   2
  -2  -2 -11 1164.38 33.5742   3
   2   2  11 1249.13 18.3161   1
   2   2  12 9.36748 3.58866   1
  -2  -2 -12 9.86611 3.26169   2
  -2  -2 -12 1.28928 8.30739   3
   2   2  13 24.3339 4.49881   1
  -2  -2 -13 32.8119 4.34546   2
  -2  -2 -13 15.4119 9.47699   3
  -2  -2 -14 2065.13 37.6637   2
  -2  -2 -14 2108.73 27.7159   2
   2   2  14 1879.75 30.1513   1
  -2  -2 -14 1962.73 49.2440   3
  -2  -2 -15 4.46801 3.84174   2
  -2  -2 -15 0.38727 9.16800   3
  -2  -2 -15-4.96764 6.43790   2
  -2  -2 -16-4.72978 4.18945   2
  -2  -2 -16 3.76768 10.2639   3
  -2  -2 -16 4.63294 6.88846   2
  -2  -2 -17 332.055 24.7980   3
  -2  -2 -17 275.655 17.8817   2
  -2  -2 -18 198.717 21.2431   3
  -2  -2 -18 226.800 17.0946   2
  -2  -2 -19 131.258 15.0027   2
  -2  -2 -19 134.668 19.1760   3
  -2  -2 -20 24.5038 14.1069   3
  -2  -2 -20 45.8789 11.5164   2
  -2  -2 -21 65.8377 13.6174   2
  -2  -2 -21 68.9385 17.6328   3
  -2  -2 -22 6.87008 16.1010   3
  -2  -2 -22 31.3712 11.6723   2
  -2  -2 -23 1765.55 65.0365   3
  -2  -2 -23 1892.97 53.5139   2
  -2  -2 -24 109.759 16.7068   2
  -2  -2 -25 20.8354 14.1805   2
  -2  -2 -26-6.13657 13.4692   2
   2   3 -24 457.585 35.7465   2
   2   3 -23 429.991 34.6113   2
   2   3 -22 44.2368 16.5914   2
   2   3 -21 4.01339 12.7027   2
   2   3 -20 532.240 33.9178   2
  -2  -3  19 244.600 25.1000   1
   2   3 -19 274.100 24.6542   2
   2   3 -18 24.6825 12.5051   2
  -2  -3  18 53.1952 15.6169   1
  -2  -3  17 59.0222 14.0364   1
   2   3 -17 63.6022 14.2422   2
   2   3 -16 55.0003 13.2444   2
  -2  -3  16 50.1282 13.9815   1
   2   3 -15 69.0760 13.9725   2
   2   3 -15 87.4296 7.93727   1
  -2  -3  15 78.5929 14.4812   1
   2   3 -14 1079.41 25.9653   1
   2   3 -14 1104.53 25.8024   1
   2   3 -14 1063.65 38.1222   2
  -2  -3  14 1006.32 38.4088   1
   2   3 -13 54.2330 7.86606   1
   2   3 -13 58.5743 12.3900   2
   2   3 -13 62.2277 8.47595   1
  -2  -3  13 38.6146 10.6022   1
   2   3 -12 323.206 16.0171   1
  -2  -3  12 321.273 20.7800   1
   2   3 -12 334.193 20.8939   2
   2   3 -11 234.187 13.9000   1
  -2  -3  11 229.939 17.6964   1
   2   3 -11 243.069 17.7005   2
   2   3 -10 113.182 10.9227   1
  -2  -3  10 94.8349 11.9189   1
   2   3 -10 92.8178 11.6609   2
   2   3  -9 1.43543 6.07575   1
  -2  -3   9 3.88021 6.85582   1
   2   3  -9 1.60614 6.49581   2
  -2  -3   8 1951.61 41.7176   1
  -2  -3   8 1915.67 29.0644   2
   2   3  -8 1922.44 40.0320   2
   2   3  -8 1944.22 37.0828   1
   2   3  -7 122.378 10.5442   1
  -2  -3   7 96.1623 10.4975   1
   2   3  -7 104.110 10.6259   2
  -2  -3   7 120.832 8.03466   2
   2   3  -6 42.2430 7.49969   1
   2   3  -6 39.0470 7.10498   2
  -2  -3   6 41.3580 5.62324   2
  -2  -3   5 159.002 8.42324   2
  -2  -3   5 157.115 11.7047   1
   2   3  -5 173.316 11.9067   1
   2   3  -5 139.810 10.7805   2
  -2  -3   4 6.18974 3.71417   2
   2   3  -4 3.13804 6.16260   1
  -2  -3   4-0.57657 5.75005   1
   2   3  -4-1.55005 4.87930   2
  -2  -3   3 407.035 16.5824   1
   2   3  -3 422.951 16.3097   1
  -2  -3   3 423.833 12.4958   2
   2   3  -3 433.586 15.4321   2
  -2  -3   2 10045.4 56.2868   2
  -2  -3   2 10021.6 74.1818   1
   2   3  -2 9989.16 66.8278   2
   2   3  -2 10019.9 72.7880   1
   2   3  -1 57.0980 6.07917   2
   2   3  -1 46.9101 7.00132   1
  -2  -3   1 61.0225 5.16871   2
  -2  -3   1 58.5438 7.60586   1
   2   3   0 26.3090 6.20629   1
  -2  -3   0 20.5114 3.65695   2
  -2  -3   0 22.0276 6.23854   1
   2   3   0 25.6966 4.44683   2
  -2  -3  -1 3013.85 26.2740   2
  -2  -3  -1 3251.75 31.8981   2
   2   3   1 3196.28 36.2246   1
  -2  -3  -1 3259.15 37.7846   1
   2   3   1 3343.35 29.7344   2
  -2  -3  -2 167.871 6.35696   2
  -2  -3  -2 166.175 9.46301   1
   2   3   2 162.014 6.49419   2
   2   3   2 172.791 9.07069   1
  -2  -3  -3 161.910 6.60017   2
  -2  -3  -3 146.645 5.75151   2
  -2  -3  -3 153.202 8.76057   1
   2   3   3 157.192 8.20973   1
  -2  -3  -4 67.9304 4.46568   2
   2   3   4 55.4270 5.14585   1
  -2  -3  -4 67.2295 7.47105   3
  -2  -3  -4 64.1326 4.99602   1
  -2  -3  -4 75.6416 6.02049   1
   2   3   5-3.57880 3.50392   1
  -2  -3  -5 0.30561 2.11403   2
  -2  -3  -6 14.9157 2.63108   2
  -2  -3  -6 9.60032 5.80025   3
   2   3   6 15.7245 3.37157   1
  -2  -3  -7 5389.88 31.3860   2
   2   3   7 5485.94 35.3855   1
   2   3   7 5521.76 36.0415   1
  -2  -3  -7 5552.23 59.4360   3
  -2  -3  -8 78.7601 4.46098   2
  -2  -3  -8 102.838 10.7318   3
   2   3   8 87.9218 5.05753   1
  -2  -3  -9 57.5490 9.32955   3
   2   3   9 64.3334 4.74665   1
  -2  -3  -9 52.6476 4.00893   2
  -2  -3 -10 324.468 8.96765   2
   2   3  10 323.915 9.74901   1
  -2  -3 -10 327.934 18.3117   3
  -2  -3 -11-0.84604 7.87696   3
  -2  -3 -11-1.70668 2.98480   2
   2   3  11 0.32692 2.84866   1
  -2  -3 -12 90.4142 5.95391   2
  -2  -3 -12 112.844 13.3660   3
   2   3  12 89.9878 6.36026   1
  -2  -3 -13 913.502 17.7256   2
  -2  -3 -13 985.247 34.0853   3
   2   3  13 897.817 19.4067   1
  -2  -3 -14 98.2727 6.58274   2
   2   3  14 100.253 7.95233   1
  -2  -3 -14 96.3385 13.7217   3
  -2  -3 -15 97.3353 7.24987   2
  -2  -3 -15 91.8482 14.8977   3
  -2  -3 -16 14.0509 4.79754   2
  -2  -3 -16 15.6960 10.7947   3
  -2  -3 -16 28.9725 8.68239   2
  -2  -3 -17 41.5710 9.57019   2
  -2  -3 -17 69.1954 14.5407   3
  -2  -3 -18 2.97607 11.4282   3
  -2  -3 -18 3.68524 8.16755   2
  -2  -3 -19 1792.67 45.9000   2
  -2  -3 -19 1960.92 58.6142   3
  -2  -3 -20 39.5962 15.8134   3
  -2  -3 -20 3.56879 9.70660   2
  -2  -3 -21-6.72018 9.82794   2
  -2  -3 -21 12.8593 15.7157   3
  -2  -3 -22 161.176 17.4723   2
  -2  -3 -22 162.072 22.9986   3
  -2  -3 -23 302.429 24.2258   2
  -2  -3 -23 271.761 28.5100   3
  -2  -3 -24 234.002 22.5636   2
  -2  -3 -25 66.9680 16.5558   2
  -2  -3 -26-4.46736 13.3265   2
  -2  -3 -27 6.38813 13.7782   2
   2   4 -24 490.836 37.5812   2
   2   4 -23 210.010 25.7212   2
   2   4 -22 29.2180 16.0765   2
   2   4 -21 25.1992 15.2188   2
   2   4 -20 29.3411 13.7134   2
  -2  -4  19 431.108 32.7913   1
   2   4 -19 457.016 31.8310   2
  -2  -4  18 561.841 35.2347   1
   2   4 -18 594.776 34.3057   2
   2   4 -17 66.3115 15.2213   2
  -2  -4  17 32.8406 13.5329   1
   2   4 -16 92.5800 15.7191   2
  -2  -4  16 67.6978 15.0537   1
  -2  -4  15 52.2459 14.6106   1
   2   4 -15 65.7529 7.63922   1
   2   4 -15 53.1038 12.8021   2
  -2  -4  14 281.761 22.8457   1
   2   4 -14 294.200 22.0746   2
   2   4 -14 311.098 14.9096   1
  -2  -4  13 10.4249 9.76705   1
   2   4 -13 1.15662 9.61670   2
   2   4 -13 2.68686 5.81351   1
   2   4 -13-2.35859 6.27483   1
   2   4 -12 759.784 23.7397   1
  -2  -4  12 744.628 32.6474   1
   2   4 -12 764.633 31.4822   2
   2   4 -12 737.472 23.8993   1
  -2  -4  11 39.6442 10.9374   1
   2   4 -11 60.3771 11.3875   2
   2   4 -11 55.2493 8.47785   1
   2   4 -11 49.7369 8.42280   1
   2   4 -10 3.73791 6.28777   1
  -2  -4  10 4.60375 8.67021   1
   2   4 -10-0.93527 8.24922   2
   2   4  -9 221.084 15.9236   2
  -2  -4   9 185.950 16.1423   1
  -2  -4   8 47.0812 9.70016   1
   2   4  -8 50.7870 9.30055   2
  -2  -4   8 60.3256 6.55857   2
   2   4  -8 41.3568 8.22273   1
   2   4  -7 394.790 18.1688   1
  -2  -4   7 432.122 14.5105   2
   2   4  -7 369.648 18.6657   2
  -2  -4   7 415.026 20.9344   1
   2   4  -6 2322.01 41.2988   1
   2   4  -6 2286.50 42.0309   2
  -2  -4   6 2236.26 44.9536   1
  -2  -4   6 2103.96 30.2133   2
  -2  -4   5-10.2053 7.66414   1
   2   4  -5 1.98522 5.46830   1
   2   4  -5-5.10834 5.94978   2
  -2  -4   5 0.40176 3.19471   2
   2   4  -4 28.4301 6.70354   2
  -2  -4   4 22.8014 7.25483   1
   2   4  -4 19.7338 6.67993   1
  -2  -4   4 43.8172 5.31044   2
  -2  -4   3 6635.15 70.1226   1
   2   4  -3 6589.91 60.8982   2
   2   4  -3 6364.77 64.0562   1
  -2  -4   3 6387.98 48.6459   2
   2   4  -2 219.584 11.3343   2
  -2  -4   2 246.670 9.72244   2
   2   4  -2 236.503 13.0679   1
  -2  -4   2 258.064 14.6533   1
   2   4  -1 29.3044 6.60652   1
  -2  -4   1 36.1421 7.97501   1
   2   4  -1 38.2736 5.58892   2
  -2  -4   1 26.1930 4.37497   2
   2   4   0 178.421 10.8868   1
  -2  -4   0 174.949 11.9300   1
  -2  -4   0 195.529 8.26841   2
   2   4   0 182.887 9.39439   2
   2   4   1 30.9847 4.54721   2
  -2  -4  -1 31.5696 7.39965   1
   2   4   1 23.8068 5.93069   1
  -2  -4  -2 178.901 9.11129   2
   2   4   2 203.294 10.7074   1
   2   4   2 201.670 8.21727   2
  -2  -4  -2 210.912 12.4579   1
   2   4   3 11161.5 70.1683   1
   2   4   3 11093.8 54.1538   2
  -2  -4  -3 11399.4 78.5024   1
   2   4   4 198.543 10.1108   1
  -2  -4  -4 191.226 11.2640   1
  -2  -4  -5 120.945 6.47651   2
  -2  -4  -5 118.967 8.64508   1
   2   4   5 105.869 7.41129   1
   2   4   6 584.740 15.2078   1
   2   4   6 601.082 14.9364   1
  -2  -4  -6 621.888 12.9552   2
  -2  -4  -6 628.045 15.2652   1
  -2  -4  -6 653.351 21.1965   3
  -2  -4  -7 25.9686 3.47422   2
   2   4   7 22.6806 4.34321   1
  -2  -4  -7 25.4243 7.23069   3
   2   4   7 28.6730 4.87884   1
  -2  -4  -7 22.3418 3.10405   1
  -2  -4  -8 131.722 11.9707   3
   2   4   8 133.232 7.42780   1
  -2  -4  -8 108.438 5.90338   2
   2   4   9 779.681 16.9112   1
  -2  -4  -9 765.622 14.6169   2
  -2  -4  -9 722.366 25.0081   3
  -2  -4 -10-3.41844 7.09334   3
  -2  -4 -10 3.32148 2.81868   2
   2   4  10 14.2332 4.10767   1
  -2  -4 -11 1.89445 7.52620   3
   2   4  11-0.11600 3.63492   1
  -2  -4 -11 10.0166 3.67940   2
   2   4  12 502.151 14.8615   1
  -2  -4 -12 532.997 24.8680   3
  -2  -4 -12 507.616 13.3810   2
   2   4  13 151.304 9.24935   1
  -2  -4 -13 158.988 15.7443   3
  -2  -4 -13 168.069 8.45758   2
  -2  -4 -14 1.29472 3.55138   2
  -2  -4 -14-5.04516 9.74819   3
   2   4  14 10.9745 5.09696   1
   2   4  15 2567.67 38.5131   1
  -2  -4 -15 2450.86 57.7934   3
  -2  -4 -15 2587.23 33.6877   2
  -2  -4 -16 13.2221 10.7012   3
  -2  -4 -16 8.64951 4.14443   2
  -2  -4 -17-8.67942 12.3529   3
  -2  -4 -18 402.186 27.6399   3
  -2  -4 -18 417.042 22.0713   2
  -2  -4 -19 123.371 18.4218   3
  -2  -4 -19 133.221 15.2086   2
  -2  -4 -20 177.172 22.8890   3
  -2  -4 -20 151.004 16.5093   2
  -2  -4 -21 27.8245 14.5820   3
  -2  -4 -21 41.0678 12.6033   2
  -2  -4 -22 36.9119 12.5028   2
  -2  -4 -22 60.4013 17.6380   3
  -2  -4 -23 22.1104 16.3391   3
  -2  -4 -23 19.5037 11.4774   2
  -2  -4 -24 1538.81 50.9971   2
  -2  -4 -24 1475.02 60.5564   3
  -2  -4 -25 32.3908 13.6526   2
  -2  -4 -26-7.68845 13.6904   2
  -2  -4 -27 7.13835 13.0703   2
   2   5 -23 518.026 37.8164   2
   2   5 -22 208.420 25.7677   2
   2   5 -21 29.9853 16.7710   2
   2   5 -20-15.2407 14.6689   2
   2   5 -19 511.007 34.0734   2
  -2  -5  19 592.528 39.4970   1
  -2  -5  18 489.398 35.2389   1
   2   5 -18 437.222 30.9141   2
   2   5 -17-7.55605 12.7003   2
  -2  -5  17-1.38542 14.1397   1
  -2  -5  16 173.482 22.5448   1
   2   5 -16 224.472 22.0307   2
   2   5 -15 8.63225 11.4490   2
  -2  -5  15 27.6130 13.8450   1
   2   5 -14 49.3587 8.43309   1
   2   5 -14 70.0864 14.1918   2
  -2  -5  14 58.3349 15.4589   1
   2   5 -13 366.058 17.2025   1
   2   5 -13 423.299 26.0439   2
  -2  -5  13 394.330 27.0767   1
  -2  -5  12 80.2400 14.7402   1
   2   5 -12 51.4310 11.9632   2
   2   5 -12 65.7071 9.35303   1
   2   5 -11 221.040 18.8133   2
   2   5 -11 297.656 16.9789   1
  -2  -5  11 268.124 21.5808   1
   2   5 -11 253.974 15.4749   1
   2   5 -10 34.7415 8.57651   1
   2   5 -10 29.7832 7.32406   1
  -2  -5  10 39.8238 12.5207   1
   2   5 -10 29.6670 9.88192   2
  -2  -5   9 229.747 19.4493   1
   2   5  -9 236.079 15.2753   1
   2   5  -9 266.195 18.1187   2
   2   5  -9 252.919 15.4038   1
   2   5  -8 56.0177 8.81700   1
  -2  -5   8 53.3841 11.4481   1
   2   5  -8 25.5490 7.84454   1
   2   5  -8 52.7839 10.4838   2
  -2  -5   7 1556.47 42.4613   1
   2   5  -7 1577.24 35.8928   1
  -2  -5   6 183.877 15.7265   1
   2   5  -6 180.675 13.3583   2
   2   5  -6 210.123 14.2056   1
  -2  -5   5 14.6298 8.12837   1
   2   5  -5 7.76624 6.15378   1
   2   5  -5-0.80335 6.02801   2
  -2  -5   4 208.895 15.6363   1
   2   5  -4 197.237 12.6818   2
   2   5  -4 218.277 14.1636   1
  -2  -5   3 80.7047 10.9683   1
   2   5  -3 88.9558 8.90127   2
   2   5  -3 98.6845 10.2934   1
   2   5  -2 473.827 17.1769   2
  -2  -5   2 505.149 21.7906   1
   2   5  -2 461.926 18.9345   1
  -2  -5   1 8270.76 82.7079   1
   2   5  -1 8271.81 74.1265   1
   2   5  -1 8316.92 66.8663   2
  -2  -5   0 420.502 19.3891   1
   2   5   0 411.032 14.5337   2
   2   5   0 423.255 17.2518   1
   2   5   1 20.6454 4.97969   2
   2   5   1 23.3098 6.52235   1
  -2  -5  -2 1862.88 37.7983   1
   2   5   2 1746.98 26.0236   2
   2   5   2 1846.59 33.1018   1
   2   5   3 219.961 9.21399   2
   2   5   3 232.412 12.2915   1
  -2  -5  -3 218.661 14.4600   1
   2   5   4 95.5012 5.98127   2
   2   5   4 105.011 8.78431   1
  -2  -5  -4 125.360 11.1481   1
   2   5   4 97.0643 8.32256   1
   2   5   5 254.629 12.1859   1
  -2  -5  -5 270.471 14.9245   1
   2   5   5 241.690 11.5969   1
   2   5   6-4.14798 4.22867   1
  -2  -5  -6 1.46122 5.97999   1
  -2  -5  -6 12.1916 4.01764   2
   2   5   6 2.97849 4.06618   1
  -2  -5  -7 0.15930 3.27668   2
   2   5   7-2.69960 4.12781   1
  -2  -5  -7 9.56296 5.42832   1
   2   5   8 3012.36 37.6791   1
  -2  -5  -8 3332.77 33.8770   2
  -2  -5  -8 3048.10 30.7307   1
  -2  -5  -8 3387.42 52.6767   3
  -2  -5  -8 3187.27 35.5980   1
  -2  -5  -9 309.997 7.03749   1
  -2  -5  -9 287.170 7.16820   1
  -2  -5  -9 352.011 18.6558   3
  -2  -5  -9 343.110 11.4212   2
   2   5   9 329.123 13.0679   1
  -2  -5 -10 20.3146 4.21528   2
  -2  -5 -10 38.2573 9.51931   3
   2   5  10 28.7823 5.43896   1
  -2  -5 -11 524.443 23.9577   3
  -2  -5 -11 569.259 14.8998   2
   2   5  11 527.151 16.4366   1
  -2  -5 -12 6.62864 3.91374   2
  -2  -5 -12 11.9562 8.98763   3
   2   5  12 10.7976 4.61503   1
   2   5  13 219.505 11.6081   1
  -2  -5 -13 225.058 18.6541   3
  -2  -5 -13 238.785 10.6416   2
   2   5  14 1035.20 24.6590   1
  -2  -5 -14 1048.65 22.0752   2
  -2  -5 -14 1009.99 37.0506   3
  -2  -5 -15 73.9195 7.02090   2
   2   5  15 84.3956 8.64294   1
  -2  -5 -15 86.1740 14.1949   3
  -2  -5 -16 124.840 17.4133   3
  -2  -5 -17 29.3177 13.1954   3
  -2  -5 -18 108.674 18.3995   3
  -2  -5 -19 43.1364 15.4433   3
  -2  -5 -20 2243.64 54.1875   2
  -2  -5 -20 2285.68 65.8314   3
  -2  -5 -21-4.89994 10.2747   2
  -2  -5 -21 16.7417 15.8123   3
  -2  -5 -22-5.48251 10.7117   2
  -2  -5 -22 5.39445 14.0126   3
  -2  -5 -23 258.209 23.5056   2
  -2  -5 -23 248.465 27.0929   3
  -2  -5 -24 132.712 19.1842   2
  -2  -5 -24 155.538 24.0404   3
  -2  -5 -25 251.087 24.8178   2
  -2  -5 -26 12.7459 13.0677   2
  -2  -5 -27-5.56430 15.5498   2
   2   6 -22 185.250 25.7722   2
   2   6 -21 13.5540 17.1233   2
   2   6 -20 56.9148 17.4614   2
   2   6 -19 129.762 20.3308   2
  -2  -6  19 41.3450 18.7360   1
   2   6 -18 321.387 27.1966   2
  -2  -6  18 305.686 31.0991   1
   2   6 -17 298.171 26.3738   2
  -2  -6  17 296.885 29.9092   1
   2   6 -16 108.903 17.6030   2
  -2  -6  16 70.7748 19.2998   1
  -2  -6  15 111.616 20.4907   1
   2   6 -15 98.8858 16.6798   2
   2   6 -14 41.3677 8.40998   1
  -2  -6  14 30.3857 14.6650   1
   2   6 -14 65.7757 14.4339   2
  -2  -6  13 195.712 22.0532   1
   2   6 -13 232.207 15.2058   1
   2   6 -13 211.594 20.3588   2
   2   6 -12 43.3958 11.9251   2
  -2  -6  12 46.9683 14.2068   1
   2   6 -12 61.6124 9.24784   1
   2   6 -11 924.462 28.7653   1
   2   6 -11 942.003 35.7491   2
  -2  -6  11 1025.29 41.9997   1
   2   6 -10 5.80154 7.09792   1
   2   6 -10 4.78961 8.32899   2
  -2  -6  10 0.92279 10.7646   1
   2   6  -9 6.67816 7.25220   2
  -2  -6   9-0.43657 9.95939   1
   2   6  -9-5.37184 7.68386   1
   2   6  -9 5.01856 7.04139   1
   2   6  -8 13.3184 6.76529   1
   2   6  -8 12.3229 8.16590   2
  -2  -6   8 22.8761 10.2401   1
   2   6  -8 35.6568 8.56094   1
   2   6  -7 10.0950 7.21347   1
  -2  -6   7 9.79021 9.17572   1
   2   6  -7 10.9692 7.22227   1
   2   6  -7 12.7674 7.15393   2
   2   6  -6 483.060 21.9189   2
   2   6  -6 487.746 21.5453   1
  -2  -6   6 507.667 26.3390   1
   2   6  -6 468.145 20.5229   1
  -2  -6   5 1523.47 43.2294   1
   2   6  -5 1519.08 36.0464   2
   2   6  -5 1544.57 35.7600   1
   2   6  -5 1499.64 36.2682   1
   2   6  -4 0.64009 5.68414   2
  -2  -6   4 16.1665 9.07889   1
   2   6  -4 9.60961 7.33212   1
   2   6  -4 9.73676 6.69065   1
   2   6  -3 22.7455 6.46757   2
  -2  -6   3 2.90976 7.76663   1
   2   6  -3 19.1371 7.93760   1
   2   6  -3 23.2828 7.78948   1
   2   6  -2 3459.97 48.4308   2
   2   6  -2 3352.63 50.0486   1
   2   6  -2 3347.57 51.6665   1
  -2  -6   2 3274.68 58.7137   1
  -2  -6   1 534.373 24.2569   1
   2   6  -1 565.676 20.7743   1
   2   6  -1 505.204 20.3876   1
   2   6  -1 524.991 18.4681   2
   2   6   0 14.0470 5.67869   1
   2   6   0 13.4112 6.56471   1
   2   6   0 14.9735 4.99100   2
  -2  -6   0 30.5128 9.47313   1
  -2  -6  -1 30.0467 9.02588   1
   2   6   1 28.3913 6.90214   1
   2   6   1 31.9651 6.77082   1
   2   6   1 31.0123 5.32482   2
   2   6   2 24.9378 5.08903   2
   2   6   2 40.8825 7.55847   1
   2   6   2 28.6172 6.78789   1
  -2  -6  -2 36.2266 9.54224   1
   2   6   3 39.5613 5.17610   2
   2   6   3 37.1286 7.04236   1
  -2  -6  -3 27.3663 9.02358   1
   2   6   3 18.3926 6.03546   1
   2   6   4 4165.41 40.3459   2
   2   6   4 4192.98 50.9040   1
  -2  -6  -4 4405.76 62.6123   1
   2   6   4 4265.86 52.4341   1
   2   6   5 195.608 9.31188   2
  -2  -6  -5 193.525 10.4640   2
   2   6   5 217.116 12.4490   1
  -2  -6  -5 222.415 15.7326   1
   2   6   5 193.530 12.1642   1
  -2  -6  -6 79.4959 10.4457   1
   2   6   6 69.4932 7.78074   1
  -2  -6  -7 194.753 13.7942   1
   2   6   7 219.075 12.0618   1
  -2  -6  -8 61.3574 9.05291   1
   2   6   8 71.8065 7.71771   1
  -2  -6  -8 43.0894 5.80159   2
  -2  -6  -9 439.655 14.5324   2
   2   6   9 462.331 16.8838   1
  -2  -6  -9 462.694 17.0382   1
  -2  -6  -9 502.015 23.3830   3
  -2  -6 -10 952.351 20.7755   2
   2   6  10 920.900 23.5739   1
  -2  -6 -10 900.593 18.9279   1
  -2  -6 -10 856.724 30.4600   3
   2   6  11 10.9278 5.49382   1
  -2  -6 -11 10.2421 4.46385   2
  -2  -6 -11 3.50707 8.41118   3
  -2  -6 -12 20.0348 5.12325   2
  -2  -6 -12 23.1114 9.81275   3
   2   6  12 36.2637 6.52351   1
  -2  -6 -13 585.421 17.4051   2
   2   6  13 568.600 19.5605   1
  -2  -6 -13 591.005 28.2628   3
  -2  -6 -14 298.740 21.8947   3
   2   6  14 282.095 14.3930   1
  -2  -6 -15 81.4775 15.7797   3
   2   6  15 75.6474 8.83759   1
   2   6  16 2126.81 40.4895   1
  -2  -6 -16 2221.91 58.7512   3
  -2  -6 -17 7.94695 13.4097   3
  -2  -6 -18 34.0617 13.2624   3
  -2  -6 -19 1294.58 50.0551   3
  -2  -6 -20 145.466 20.7765   3
  -2  -6 -21 232.579 25.9575   3
  -2  -6 -21 222.063 20.2901   2
  -2  -6 -22 32.7502 13.5581   2
  -2  -6 -22 33.5462 16.1183   3
  -2  -6 -23 77.0545 19.7230   3
  -2  -6 -23 63.7566 15.1654   2
  -2  -6 -24 6.62611 15.9927   3
  -2  -6 -24 6.19922 12.3764   2
  -2  -6 -25 1036.71 52.7509   3
  -2  -6 -25 998.240 44.7045   2
  -2  -6 -26-7.21644 14.0018   2
  -2  -6 -27-3.66458 14.4464   2
   2   7 -21 171.025 24.7342   2
   2   7 -20 29.6131 16.5665   2
   2   7 -19-0.93590 13.6192   2
  -2  -7  19-9.28601 18.5378   1
  -2  -7  18 371.615 35.0184   1
   2   7 -18 430.810 31.9034   2
   2   7 -17 558.642 35.0411   2
  -2  -7  17 576.271 41.2330   1
  -2  -7  16 11.8986 16.6747   1
   2   7 -16 6.53592 12.8417   2
  -2  -7  15 297.825 28.9081   1
   2   7 -15 286.152 24.7742   2
   2   7 -14 3.42540 11.6077   2
  -2  -7  14 28.3202 15.6425   1
  -2  -7  13 8.31452 14.6285   1
   2   7 -13 30.8334 8.13789   1
   2   7 -13 44.3548 13.5411   2
  -2  -7  12 68.9222 17.6673   1
   2   7 -12 69.5972 10.8962   1
   2   7 -12 41.6313 12.5954   2
  -2  -7  11 102.201 17.6656   1
   2   7 -11 104.106 15.3099   2
   2   7 -11 119.072 13.0020   1
   2   7 -10 357.976 23.3928   2
   2   7 -10 358.512 19.8924   1
  -2  -7  10 346.788 27.2192   1
   2   7  -9 191.289 17.3891   2
  -2  -7   9 201.336 21.2607   1
   2   7  -9 198.713 15.2252   1
   2   7  -8 40.2755 9.50768   1
  -2  -7   8 13.4306 10.6175   1
   2   7  -8 41.1213 10.5439   2
   2   7  -7 98.3892 12.6122   2
  -2  -7   7 80.5118 15.6402   1
   2   7  -7 106.608 12.2842   1
   2   7  -6 2476.72 49.5222   2
  -2  -7   6 2257.92 58.3413   1
   2   7  -6 2311.16 47.7939   1
   2   7  -6 2267.59 46.3802   1
   2   7  -5 196.622 14.7486   2
   2   7  -5 242.470 16.3649   1
  -2  -7   5 191.981 18.5170   1
  -2  -7   4 1.38962 9.37228   1
   2   7  -4 4.02710 6.80696   2
   2   7  -4 8.79720 7.84570   1
   2   7  -4 5.09038 7.76030   1
   2   7  -3-0.92464 5.61010   2
   2   7  -3 0.95353 6.99771   1
  -2  -7   3 0.95660 8.69514   1
   2   7  -3-1.96776 6.68378   1
  -2  -7   2-1.75744 8.37106   1
   2   7  -2 0.76828 6.72198   1
   2   7  -2 8.81087 5.80288   2
   2   7  -2 7.91111 7.22245   1
   2   7  -1 120.541 10.2248   2
  -2  -7   1 81.2090 12.9351   1
   2   7  -1 132.352 12.5738   1
   2   7  -1 117.560 11.7658   1
  -2  -7   0 1603.13 44.1989   1
   2   7   0 1463.35 35.6833   1
   2   7   0 1547.62 35.8425   1
   2   7   0 1557.59 32.0391   2
   2   7   1 80.2107 8.16990   2
   2   7   1 119.516 11.7395   1
   2   7   1 103.229 10.8956   1
  -2  -7  -1 87.1025 13.1773   1
   2   7   2 3.63425 4.18790   2
   2   7   2 5.71920 6.12875   1
  -2  -7  -2 2.09555 9.88523   1
   2   7   2-10.1422 7.24647   1
   2   7   3 1360.88 33.4394   1
  -2  -7  -3 1484.04 41.1958   1
   2   7   3 1447.65 33.4555   1
   2   7   3 1443.49 27.7294   2
  -2  -7  -4 320.281 20.4594   1
   2   7   4 313.861 16.1064   1
   2   7   4 299.879 12.4214   2
   2   7   5 59.5827 6.15538   2
   2   7   5 46.9122 8.41707   1
  -2  -7  -5 60.5806 11.6092   1
  -2  -7  -6 113.395 13.3023   1
   2   7   6 126.324 7.87448   2
   2   7   6 128.139 10.8042   1
  -2  -7  -7 0.38590 4.61280   2
   2   7   7 0.21132 5.40003   1
  -2  -7  -7 0.07332 8.36918   1
  -2  -7  -8 16.8061 7.66520   1
   2   7   8 9.91066 5.25822   1
  -2  -7  -9 1416.12 34.9248   1
   2   7   9 1417.71 31.7942   1
  -2  -7 -10 511.158 17.4492   2
  -2  -7 -10 478.075 19.7248   1
   2   7  10 477.261 19.0063   1
  -2  -7 -11 31.3171 7.07331   1
  -2  -7 -11 26.1887 5.95652   2
   2   7  11 30.1881 7.21365   1
  -2  -7 -12 776.716 32.3731   3
   2   7  12 748.867 23.6159   1
  -2  -7 -13 3.93478 9.59163   3
   2   7  13 0.70987 5.53969   1
  -2  -7 -14 57.8860 13.1265   3
   2   7  14 70.4655 8.86074   1
  -2  -7 -15 1671.22 50.2893   3
   2   7  15 1557.72 35.4749   1
  -2  -7 -16 1.89237 11.5644   3
   2   7  16 38.7935 8.36725   1
  -2  -7 -17 115.437 18.4248   3
  -2  -7 -18 5.17676 13.4320   3
  -2  -7 -19 253.614 25.7808   3
  -2  -7 -20 15.4007 14.3891   3
  -2  -7 -21 1982.95 65.7578   3
  -2  -7 -22 28.1639 18.3746   3
  -2  -7 -22-2.11807 11.5653   2
  -2  -7 -23-0.12735 11.9161   2
  -2  -7 -23 9.71859 17.8533   3
  -2  -7 -24 172.726 21.0418   2
  -2  -7 -24 182.040 27.0356   3
  -2  -7 -25 156.359 26.9490   3
  -2  -7 -25 124.680 20.2747   2
  -2  -7 -26 266.373 26.6473   2
  -2  -7 -27 29.5252 15.6471   2
   2   8 -20-17.1496 18.0228   2
   2   8 -19 32.4832 13.9514   2
  -2  -8  18 105.615 25.5495   1
   2   8 -18 59.4170 17.1434   2
  -2  -8  17 184.450 29.2446   1
   2   8 -17 194.463 22.8820   2
   2   8 -16 105.302 19.2099   2
  -2  -8  16 133.384 24.9166   1
   2   8 -15 105.669 17.4613   2
  -2  -8  15 137.648 24.6318   1
   2   8 -14 143.997 19.1564   2
  -2  -8  14 163.307 25.0145   1
   2   8 -13 53.8662 10.3490   1
  -2  -8  13 52.5253 18.7022   1
   2   8 -13 55.0626 13.9734   2
   2   8 -12 335.172 25.1783   2
   2   8 -12 381.515 20.7162   1
  -2  -8  12 316.660 30.3526   1
   2   8 -11 108.141 15.7296   2
   2   8 -11 128.544 14.0692   1
  -2  -8  11 150.929 22.0529   1
  -2  -8  10 1322.94 53.4708   1
   2   8 -10 1319.23 37.3513   1
   2   8 -10 1335.17 43.5738   2
   2   8  -9 137.459 14.2574   1
   2   8  -9 159.292 16.6228   2
  -2  -8   9 178.335 22.4746   1
   2   8  -8 3.22584 8.10853   2
  -2  -8   8 20.6427 13.4758   1
   2   8  -8 6.58381 8.02458   1
   2   8  -7 10.0542 8.18131   2
   2   8  -7-1.47833 8.20927   1
  -2  -8   7-7.80270 12.6526   1
   2   8  -6 26.4152 9.18629   2
   2   8  -6 39.3186 10.2042   1
  -2  -8   6 13.8563 11.5723   1
  -2  -8   5 539.206 31.5651   1
   2   8  -5 463.263 22.9497   1
   2   8  -5 529.942 24.5009   2
  -2  -8   4 1052.31 41.6423   1
   2   8  -4 961.591 30.9697   2
   2   8  -4 984.155 32.1454   1
   2   8  -3 12.8066 7.33077   2
   2   8  -3 3.04425 7.43447   1
  -2  -8   3 28.5365 11.8738   1
   2   8  -2 57.2482 9.05559   2
  -2  -8   2 42.8018 12.4589   1
  -2  -8   1 2195.13 56.4703   1
   2   8  -1 2142.56 45.7764   1
   2   8  -1 2186.72 41.4885   2
   2   8   0 481.416 22.1984   1
  -2  -8   0 505.782 28.3019   1
   2   8   0 439.590 18.7397   2
   2   8   1 20.9531 5.72143   2
   2   8   1 45.0342 9.04395   1
  -2  -8  -1 25.5127 11.2090   1
   2   8   2 23.9577 6.39837   2
   2   8   2 34.0013 8.71727   1
  -2  -8  -2 31.9372 11.0839   1
   2   8   3 10.4554 7.10387   1
   2   8   3 1.84416 4.94716   2
  -2  -8  -3 22.3479 11.4761   1
   2   8   4 13.4484 4.80616   2
  -2  -8  -4 9.68592 9.84418   1
   2   8   4 15.7649 7.64167   1
   2   8   5 2248.83 34.8358   2
  -2  -8  -5 2236.62 54.2102   1
   2   8   5 2133.06 43.1258   1
  -2  -8  -6 377.570 23.4528   1
   2   8   6 323.595 17.5774   1
  -2  -8  -7 69.6117 12.9325   1
   2   8   7 71.5480 9.20689   1
   2   8   8 6.09724 6.81179   1
  -2  -8  -8 16.4322 9.00263   1
   2   8   9 72.2048 9.16336   1
  -2  -8  -9 99.7799 13.9289   1
  -2  -8 -10 355.455 20.1423   1
   2   8  10 327.990 17.4913   1
  -2  -8 -11 1636.73 38.1695   1
   2   8  11 1659.89 37.4915   1
   2   8  12 0.55551 5.88886   1
  -2  -8 -12 11.9767 9.76106   3
  -2  -8 -12 6.39522 6.76846   1
   2   8  13 7.76771 6.14882   1
  -2  -8 -13 13.3808 10.9260   3
  -2  -8 -13 11.1070 4.75613   1
   2   8  14 52.3134 8.65023   1
  -2  -8 -14 36.9879 13.2976   3
  -2  -8 -15 167.903 19.7457   3
   2   8  15 214.863 15.2689   1
   2   8  16 4.65366 6.79763   1
  -2  -8 -16 13.9914 11.9097   3
  -2  -8 -17 1576.72 53.9424   3
  -2  -8 -18 1.53695 13.3432   3
  -2  -8 -19 68.7906 18.1027   3
  -2  -8 -20 1072.48 49.0590   3
  -2  -8 -21 25.7931 16.4383   3
  -2  -8 -22 191.463 26.2838   3
  -2  -8 -23-4.96483 16.4762   3
  -2  -8 -24 44.0599 19.6637   3
  -2  -8 -24 67.9527 16.6634   2
  -2  -8 -25-17.0511 17.4687   3
  -2  -8 -25-3.53276 13.6151   2
  -2  -8 -26 787.933 42.6293   2
  -2  -8 -26 707.826 47.0654   3
  -2  -8 -27 15.2207 14.9028   2
   2   9 -19 62.0218 16.8490   2
  -2  -9  18 11.4260 23.6063   1
   2   9 -18-14.6004 15.7003   2
  -2  -9  17 200.207 33.3724   1
   2   9 -17 245.857 26.6053   2
   2   9 -16 471.922 33.8115   2
  -2  -9  16 410.366 40.0090   1
  -2  -9  15 59.0273 23.8277   1
   2   9 -15 113.212 20.2180   2
   2   9 -14 415.552 30.4638   2
  -2  -9  14 274.787 31.6185   1
  -2  -9  13-11.4425 19.8311   1
   2   9 -13 39.0952 13.4148   2
   2   9 -12 73.2953 12.0156   1
   2   9 -12 34.9062 12.9011   2
  -2  -9  12 50.7012 17.8386   1
  -2  -9  11 57.4958 19.4905   1
   2   9 -11 10.3693 11.2747   2
   2   9 -11 50.1337 10.9012   1
  -2  -9  10 28.5037 15.9726   1
   2   9 -10 67.3425 13.8893   2
   2   9 -10 41.9996 10.7415   1
  -2  -9   9 266.189 27.3292   1
   2   9  -9 350.577 24.4532   2
   2   9  -9 327.922 20.6295   1
   2   9  -8 155.769 17.5180   2
   2   9  -8 171.018 16.1008   1
  -2  -9   8 213.041 24.4646   1
   2   9  -7 135.131 15.1059   1
   2   9  -7 102.343 14.2868   2
  -2  -9   7 107.795 20.9173   1
  -2  -9   6 237.593 24.9434   1
   2   9  -6 230.035 18.4519   1
   2   9  -6 275.019 19.4525   2
  -2  -9   5 2504.21 69.1370   1
   2   9  -5 2603.76 54.8987   1
   2   9  -5 2687.47 54.8366   2
  -2  -9   4 463.904 30.8291   1
   2   9  -4 454.793 23.8078   1
   2   9  -4 380.587 21.1087   2
   2   9  -3-1.24450 8.27738   1
  -2  -9   3-0.12996 12.3931   1
   2   9  -3-1.94285 7.10290   2
   2   9  -2 1.12414 6.60554   2
   2   9  -2-3.76229 8.58140   1
  -2  -9   2-9.08289 11.9178   1
  -2  -9   1 16.1471 12.7007   1
   2   9  -1 9.79986 7.24138   2
   2   9  -1 6.52903 7.98233   1
   2   9   0 121.331 11.4168   2
   2   9   0 99.6943 12.6015   1
  -2  -9   0 105.845 17.4005   1
  -2  -9  -1 1541.91 50.4573   1
   2   9   1 1541.22 34.9802   2
   2   9   1 1658.72 42.1763   1
   2   9   2 264.964 15.0821   2
   2   9   2 257.948 17.5542   1
   2   9   3 19.7622 8.75261   1
   2   9   3-0.72358 5.05380   2
  -2  -9  -3 25.6313 13.3647   1
  -2  -9  -4 1300.50 45.3231   1
   2   9   4 1289.32 36.3481   1
  -2  -9  -5 613.069 31.9370   1
   2   9   5 603.905 25.4387   1
  -2  -9  -6 253.468 22.0650   1
   2   9   6 261.166 17.1540   1
  -2  -9  -7 650.699 32.1102   1
   2   9   7 617.444 25.0244   1
  -2  -9  -8 24.1208 11.2795   1
   2   9   8 16.1597 7.83967   1
  -2  -9  -9 2.65047 9.62140   1
   2   9   9 2.34225 7.78828   1
  -2  -9 -10 379.991 23.5255   1
   2   9  10 366.724 19.6695   1
  -2  -9 -11 405.232 23.0385   1
   2   9  11 403.830 20.6335   1
   2   9  12 47.1161 9.96693   1
  -2  -9 -12 50.9702 11.0309   1
  -2  -9 -13 749.960 35.3986   3
   2   9  13 776.289 28.4282   1
  -2  -9 -13 812.045 25.3618   1
  -2  -9 -14 26.9611 13.7220   3
   2   9  14 21.9115 9.04634   1
  -2  -9 -15 107.729 17.9618   3
   2   9  15 69.8163 10.6463   1
  -2  -9 -16 1351.48 50.1779   3
   2   9  16 1269.28 37.5109   1
  -2  -9 -17 8.79611 12.6922   3
   2   9  17-6.90535 8.72905   1
  -2  -9 -18 140.575 21.5917   3
  -2  -9 -19 19.2444 17.0846   3
  -2  -9 -20 124.244 22.2239   3
  -2  -9 -21 29.9173 18.5609   3
  -2  -9 -22 1459.73 61.2375   3
  -2  -9 -23 7.24284 17.1582   3
  -2  -9 -24 10.5795 19.9609   3
  -2  -9 -25 298.957 28.2089   2
  -2  -9 -25 210.223 29.6226   3
  -2  -9 -26 14.3565 15.4802   2
  -2  -9 -26 27.1258 21.2344   3
  -2 -10  18 92.1643 27.5672   1
  -2 -10  17 52.6708 26.1478   1
  -2 -10  16 142.137 31.3578   1
   2  10 -16 121.837 21.6245   2
   2  10 -15 1.66942 14.8510   2
  -2 -10  15 60.5640 23.3366   1
  -2 -10  14 44.3189 22.8546   1
   2  10 -14 82.2216 17.6499   2
  -2 -10  13 189.553 29.2125   1
   2  10 -13 108.124 19.1495   2
   2  10 -12 11.4580 13.7859   2
  -2 -10  12 23.5444 20.3364   1
   2  10 -12 16.7602 10.1109   1
  -2 -10  11 299.941 32.9621   1
   2  10 -11 326.072 25.9247   2
   2  10 -11 338.216 21.2503   1
  -2 -10  10 188.876 27.6272   1
   2  10 -10 245.457 19.5833   1
   2  10 -10 168.320 19.9175   2
   2  10  -9 941.747 34.9409   1
  -2 -10   9 1022.52 52.5480   1
   2  10  -9 946.394 38.8991   2
  -2 -10   8 83.3890 21.6704   1
   2  10  -8 65.3219 12.6790   1
   2  10  -8 56.5903 13.2951   2
   2  10  -7-6.93471 8.85701   2
   2  10  -7 0.73635 9.11848   1
  -2 -10   7-5.96344 15.8287   1
   2  10  -6 32.7122 10.3058   2
  -2 -10   6 57.5872 16.9744   1
   2  10  -6 19.9993 10.7556   1
  -2 -10   5 6.02856 15.4876   1
   2  10  -5 0.27603 8.38681   2
   2  10  -5-0.82910 8.93795   1
  -2 -10   4 411.606 32.5599   1
   2  10  -4 469.763 25.8713   1
   2  10  -4 400.894 22.9697   2
   2  10  -3 875.434 33.7148   1
  -2 -10   3 911.042 44.5634   1
   2  10  -3 831.291 30.9482   2
  -2 -10   2 59.9047 16.3377   1
   2  10  -2 59.7681 12.2058   1
   2  10  -2 52.9629 9.54954   2
  -2 -10   1 89.8806 18.6357   1
   2  10  -1 52.9252 12.0015   1
   2  10  -1 60.7812 9.95481   2
  -2 -10   0 1530.60 54.6823   1
   2  10   0 1665.21 45.0583   1
   2  10   1 391.427 22.8592   1
  -2 -10  -1 407.859 30.3870   1
   2  10   2 67.5094 11.7025   1
  -2 -10  -2 74.4442 16.1963   1
  -2 -10  -3 29.3975 13.2000   1
   2  10   3 34.0313 9.88455   1
  -2 -10  -4 0.90837 11.5824   1
   2  10   4 18.5356 9.35569   1
  -2 -10  -5 20.0610 13.0638   1
   2  10   5 2.63843 7.98365   1
   2  10   6 720.548 28.9820   1
  -2 -10  -6 658.207 35.3980   1
   2  10   7 121.545 14.1800   1
  -2 -10  -7 122.348 18.3590   1
   2  10   8 11.7853 7.41672   1
  -2 -10  -8 6.59025 11.6117   1
   2  10   9 38.9864 10.0614   1
  -2 -10  -9 38.3695 13.2205   1
  -2 -10 -10 288.966 23.3792   1
   2  10  10 264.015 18.5698   1
  -2 -10 -11 443.349 26.8369   1
   2  10  11 445.227 23.1886   1
  -2 -10 -12 1316.41 41.7790   1
   2  10  12 1407.56 39.9930   1
   2  10  13 27.4039 9.89789   1
  -2 -10 -13 26.2454 13.1162   3
  -2 -10 -13 34.3679 10.3035   1
   2  10  14 14.6561 7.58337   1
  -2 -10 -14 23.0624 13.8641   3
   2  10  15 15.3482 9.21211   1
  -2 -10 -15 12.6246 12.4726   3
  -2 -10 -16 157.395 21.4402   3
   2  10  16 161.265 15.8374   1
  -2 -10 -17-0.29473 13.5541   3
   2  10  17-7.05284 8.78014   1
  -2 -10 -18 1228.72 52.1855   3
  -2 -10 -19 5.03718 16.0755   3
  -2 -10 -20 47.2725 19.3158   3
  -2 -10 -21 952.830 50.5017   3
  -2 -10 -22-6.71541 16.8293   3
  -2 -10 -23 278.027 32.4135   3
  -2 -10 -24-13.7180 21.1250   3
  -2 -10 -25 70.0297 22.5859   3
  -2 -10 -26 13.0271 20.2047   3
  -2 -10 -26 0.50857 15.1834   2
  -2 -11  16 118.984 31.2740   1
  -2 -11  15 445.374 44.8870   1
  -2 -11  14 145.842 32.5957   1
  -2 -11  13 409.124 41.9897   1
  -2 -11  12-16.9463 22.3412   1
   2  11 -11 13.4583 10.0038   1
  -2 -11  11 38.0503 21.1890   1
  -2 -11  10 1.71848 19.3571   1
   2  11 -10 27.4421 10.8113   1
   2  11  -9 21.5182 10.3756   1
  -2 -11   9-10.1457 18.1440   1
  -2 -11   8 318.416 34.5963   1
   2  11  -8 327.430 22.8699   1
  -2 -11   7 67.1190 19.3747   1
   2  11  -7 73.3264 13.9077   1
  -2 -11   6 87.1867 22.3651   1
   2  11  -6 53.3431 12.5999   1
   2  11  -5 214.615 19.2022   1
  -2 -11   5 181.376 25.6538   1
  -2 -11   4 1858.97 67.7366   1
   2  11  -4 1744.71 49.2830   1
  -2 -11   3 756.328 44.4502   1
   2  11  -3 803.107 33.8315   1
   2  11  -2 34.5213 12.2189   1
  -2 -11   2 49.1853 17.1681   1
   2  11  -1 19.1204 10.8917   1
  -2 -11   1 2.45386 15.8738   1
  -2 -11   0-18.0276 15.0418   1
   2  11   0 8.40380 10.2566   1
   2  11   1 84.4213 13.9193   1
  -2 -11  -1 119.696 21.2512   1
   2  11   2 660.727 30.3773   1
  -2 -11  -2 701.040 40.3345   1
   2  11   3 292.665 21.0150   1
  -2 -11  -3 288.819 28.3752   1
  -2 -11  -4 40.0308 15.9913   1
   2  11   4 16.7578 10.4332   1
  -2 -11  -5 524.265 34.5789   1
   2  11   5 528.759 26.9536   1
  -2 -11  -6 490.174 33.2688   1
   2  11   6 476.198 25.9486   1
  -2 -11  -7 236.586 25.3298   1
   2  11   7 277.766 20.5268   1
  -2 -11  -8 545.596 33.9606   1
   2  11   8 449.079 24.9844   1
  -2 -11  -9 14.7624 14.4630   1
   2  11   9 11.4727 9.86704   1
  -2 -11 -10 14.5603 13.0260   1
   2  11  10-6.81002 9.22577   1
   2  11  11 92.1945 13.2531   1
  -2 -11 -11 125.152 18.3899   1
  -2 -11 -12 306.748 24.4550   1
   2  11  12 298.025 20.7986   1
  -2 -11 -13 32.6754 11.8395   1
   2  11  13 31.7351 9.87034   1
   2  11  14 312.181 21.1858   1
  -2 -11 -14 328.260 27.8770   3
  -2 -11 -15 16.1873 13.3487   3
   2  11  15 42.3446 11.1635   1
  -2 -11 -16 95.7554 19.6743   3
   2  11  16 183.192 17.9119   1
  -2 -11 -17 1390.82 55.7583   3
   2  11  17 1563.40 46.5961   1
   2  11  18 23.7618 11.5252   1
  -2 -11 -18 33.6907 16.6393   3
  -2 -11 -19 149.550 23.4126   3
  -2 -11 -20-12.2378 17.7327   3
  -2 -11 -21 79.5929 21.3150   3
  -2 -11 -22 40.6052 19.0696   3
  -2 -11 -23 784.447 50.2597   3
  -2 -11 -24 20.4169 18.8715   3
  -2 -11 -25-11.3324 21.7471   3
  -2 -11 -26 191.203 29.9891   3
  -2 -12  14 27.3704 24.4286   1
  -2 -12  13 82.7791 26.6346   1
  -2 -12  12 109.481 29.2762   1
  -2 -12  11-3.73679 20.5149   1
  -2 -12  10 261.902 35.5394   1
   2  12 -10 252.015 20.4823   1
  -2 -12   9 325.075 37.3577   1
   2  12  -9 301.275 23.1473   1
   2  12  -8 1021.81 38.9384   1
  -2 -12   8 1239.25 64.2937   1
  -2 -12   7 251.476 32.1624   1
   2  12  -7 255.528 21.7010   1
  -2 -12   6-16.2743 19.9088   1
   2  12  -6-17.8392 13.0628   1
   2  12  -5 11.3851 10.8650   1
  -2 -12   5 56.4233 20.2900   1
  -2 -12   4-6.83809 19.0319   1
   2  12  -4-12.6210 11.1907   1
   2  12  -3 233.526 21.1119   1
  -2 -12   3 243.235 30.0705   1
  -2 -12   2 362.067 34.1768   1
   2  12  -2 430.130 26.7353   1
  -2 -12   1 53.0399 19.6577   1
   2  12  -1 46.6518 12.8302   1
   2  12   0 30.1849 11.7519   1
  -2 -12   0 49.4250 19.6896   1
  -2 -12  -1 1404.90 61.1603   1
   2  12   1 1373.85 45.3798   1
   2  12   2 857.547 36.3446   1
  -2 -12  -2 877.510 48.0486   1
   2  12   3 67.2590 13.7375   1
  -2 -12  -3 134.908 23.2664   1
   2  12   4 88.0345 15.1825   1
  -2 -12  -4 124.837 22.3730   1
   2  12   5 9.58462 10.0706   1
  -2 -12  -5 16.6344 16.1827   1
  -2 -12  -6 11.6299 15.4225   1
   2  12   6-2.27718 10.4189   1
  -2 -12  -7 230.870 26.0205   1
   2  12   7 202.556 19.2821   1
  -2 -12  -8 342.979 29.8766   1
   2  12   8 305.966 22.3018   1
  -2 -12  -9 51.0933 15.6007   1
   2  12   9 63.7920 12.7423   1
   2  12  10-9.25380 10.6968   1
  -2 -12 -10 5.71293 13.6387   1
  -2 -12 -11 100.542 19.0325   1
   2  12  11 85.9999 13.6898   1
  -2 -12 -12 224.910 23.3794   1
   2  12  12 209.046 19.4345   1
  -2 -12 -13 919.876 39.7058   1
   2  12  13 930.756 36.7508   1
   2  12  14 26.0631 10.8704   1
  -2 -12 -14 23.0491 15.5999   3
   2  12  15 11.3756 9.95877   1
  -2 -12 -15 11.7983 14.7194   3
  -2 -12 -16-3.13700 15.5006   3
   2  12  16-0.64695 10.3259   1
   2  12  17 180.134 19.1690   1
  -2 -12 -17 142.224 23.4699   3
  -2 -12 -18 7.21687 16.9985   3
   2  12  18 20.1556 10.2491   1
  -2 -12 -19 817.282 47.1783   3
  -2 -12 -20-8.34329 17.8523   3
  -2 -12 -21 20.2012 19.5838   3
  -2 -12 -22 530.194 42.1949   3
  -2 -12 -23 7.70181 20.6318   3
  -2 -12 -24 312.588 36.7179   3
  -2 -12 -25 16.8015 21.6238   3
  -2 -12 -26 105.118 30.0114   3
  -2 -13  12 257.678 37.3875   1
  -2 -13  11 3.59116 22.3358   1
  -2 -13  10-16.6741 23.1117   1
  -2 -13   9 25.1440 20.9449   1
   2  13  -9 42.2578 13.5727   1
  -2 -13   8-12.1678 24.3562   1
   2  13  -8-4.90912 12.4515   1
   2  13  -7 193.819 20.1202   1
  -2 -13   7 237.503 34.2023   1
   2  13  -6 52.2058 14.3931   1
  -2 -13   6 20.8179 21.6618   1
   2  13  -5 9.66253 11.0349   1
  -2 -13   5-18.0686 22.1306   1
  -2 -13   4 120.782 26.5362   1
   2  13  -4 193.178 20.4934   1
  -2 -13   3 1355.12 65.5837   1
   2  13  -3 1353.29 47.4226   1
   2  13  -2 788.700 36.6875   1
  -2 -13   2 789.000 50.6158   1
   2  13  -1 62.5676 14.9870   1
  -2 -13   1 18.1324 17.9309   1
   2  13   0-4.95650 10.6646   1
  -2 -13   0 49.4297 21.0305   1
   2  13   1 94.8464 16.2958   1
  -2 -13  -1 105.534 23.7156   1
  -2 -13  -2 31.8091 19.9149   1
   2  13   2 42.8108 13.2789   1
   2  13   3 252.156 23.0585   1
  -2 -13  -3 228.227 28.5845   1
  -2 -13  -4 114.738 22.9997   1
   2  13   4 91.9999 15.9613   1
   2  13   5 2.52381 11.0623   1
  -2 -13  -5-4.90400 16.5249   1
  -2 -13  -6 232.322 28.3338   1
   2  13   6 236.436 21.6510   1
   2  13   7 552.740 30.7604   1
  -2 -13  -7 690.624 43.7869   1
  -2 -13  -8 370.417 33.9635   1
   2  13   8 314.282 23.9793   1
   2  13   9 620.298 32.2905   1
  -2 -13  -9 652.592 41.5334   1
   2  13  10 35.4763 13.0628   1
  -2 -13 -10 18.0085 16.7835   1
  -2 -13 -11-3.50021 15.5075   1
   2  13  11-1.82373 10.9341   1
  -2 -13 -12 23.4472 14.6669   1
   2  13  12 22.0819 12.0844   1
   2  13  13 144.073 18.9390   1
  -2 -13 -13 150.123 21.2817   1
   2  13  14-6.45297 10.6586   1
  -2 -13 -15 291.186 29.3809   3
   2  13  15 354.752 25.6934   1
  -2 -13 -16-18.2336 16.6407   3
   2  13  16 11.9362 12.2198   1
  -2 -13 -17 83.7984 21.8630   3
   2  13  17 128.131 17.7962   1
  -2 -13 -18 1116.94 56.1833   3
   2  13  18 1147.39 45.2577   1
  -2 -13 -19 72.4198 20.5477   3
   2  13  19 85.3004 16.9023   1
  -2 -13 -20 99.4382 23.8027   3
  -2 -13 -21 21.1774 20.4303   3
  -2 -13 -22 40.4441 21.5931   3
  -2 -13 -23 28.4725 20.3190   3
  -2 -13 -24 413.521 40.4815   3
  -2 -13 -25 42.1711 24.0977   3
  -2 -14  10-27.7451 28.7553   1
  -2 -14   9 183.478 36.3888   1
  -2 -14   8 263.527 39.1769   1
   2  14  -8 268.891 23.7004   1
   2  14  -7 853.482 39.0702   1
  -2 -14   7 814.524 58.8324   1
  -2 -14   6 356.226 41.3227   1
   2  14  -6 311.168 26.0441   1
   2  14  -5 13.1068 12.3829   1
  -2 -14   5 41.8571 23.5873   1
  -2 -14   4 18.7707 23.0557   1
   2  14  -4 39.8250 13.6147   1
   2  14  -3 25.2884 13.1113   1
  -2 -14   3 21.0900 22.1575   1
  -2 -14   2 103.712 26.8763   1
   2  14  -2 46.9833 13.8467   1
   2  14  -1 127.308 18.8518   1
  -2 -14   1 102.459 26.1551   1
  -2 -14   0 61.1414 25.3087   1
   2  14   0 41.8936 15.1274   1
   2  14   1 36.7206 13.8645   1
  -2 -14  -1 52.7269 23.6430   1
   2  14   2 984.413 42.5351   1
  -2 -14  -2 1023.41 58.4595   1
   2  14   3 1017.54 42.9982   1
  -2 -14  -3 1047.23 57.8171   1
   2  14   4 232.047 22.7692   1
  -2 -14  -4 312.184 34.7124   1
  -2 -14  -5 122.892 26.8891   1
   2  14   5 61.5074 14.1801   1
  -2 -14  -6-11.1824 20.7841   1
   2  14   6 3.62034 11.6654   1
  -2 -14  -7 12.9037 19.3906   1
   2  14   7 27.5028 14.1293   1
  -2 -14  -8 34.2732 23.0130   1
   2  14   8 25.8670 13.5045   1
  -2 -14  -9 151.763 25.1774   1
   2  14   9 191.036 21.4064   1
  -2 -14 -10 54.0067 18.7279   1
   2  14  10 15.8642 11.7992   1
  -2 -14 -11 12.4895 16.8571   1
   2  14  11 16.2633 11.3222   1
   2  14  12 163.382 19.3189   1
  -2 -14 -12 181.749 25.0921   1
  -2 -14 -13 248.480 26.8241   1
   2  14  13 203.044 21.2171   1
   2  14  14 929.718 41.4561   1
   2  14  15 108.087 18.0540   1
  -2 -14 -15 42.7044 18.4182   3
  -2 -14 -16-4.22162 19.1655   3
   2  14  16 11.6315 12.0833   1
  -2 -14 -17 60.9733 20.6589   3
   2  14  17 32.6477 13.9929   1
   2  14  18 61.4421 15.8005   1
  -2 -14 -18 39.5853 20.9755   3
  -2 -14 -19 1.67220 17.8255   3
   2  14  19 23.7297 14.5974   1
  -2 -14 -20 371.482 38.0867   3
  -2 -14 -21-1.99581 20.7569   3
  -2 -14 -22 19.7622 21.4412   3
  -2 -14 -23 388.519 40.9601   3
  -2 -14 -24 55.2974 26.3536   3
   2  15  -7 1.12070 13.4804   1
  -2 -15   7 122.810 35.4776   1
  -2 -15   6 145.423 35.9359   1
   2  15  -6 110.745 19.2772   1
   2  15  -5 20.6910 14.1129   1
  -2 -15   5 19.6493 25.5401   1
  -2 -15   4 47.5871 25.6201   1
   2  15  -4 31.9359 15.7017   1
   2  15  -3 111.854 19.3115   1
  -2 -15   3 161.768 32.5342   1
  -2 -15   2 756.219 56.6145   1
   2  15  -2 730.049 38.3741   1
  -2 -15   1 869.570 58.9284   1
   2  15  -1 774.373 39.6659   1
  -2 -15   0 41.1823 24.5238   1
   2  15   0 14.8962 12.9599   1
  -2 -15  -1-3.77662 22.7055   1
   2  15   1-11.0392 13.2305   1
   2  15   2 28.2883 13.7767   1
  -2 -15  -2 42.6520 23.4303   1
  -2 -15  -3-8.09638 22.7628   1
   2  15   3-4.82960 13.5746   1
  -2 -15  -4 110.740 26.7749   1
   2  15   4 130.155 19.8213   1
   2  15   5 231.430 23.9501   1
  -2 -15  -5 153.766 29.3910   1
   2  15   6-20.3655 14.2241   1
  -2 -15  -6 2.76414 20.5812   1
   2  15   7 182.349 21.6030   1
  -2 -15  -7 189.401 29.9413   1
   2  15   8 737.435 38.8696   1
  -2 -15  -8 871.252 53.4068   1
  -2 -15  -9 249.070 31.0872   1
   2  15   9 314.408 26.6440   1
  -2 -15 -10 737.958 48.4980   1
   2  15  10 659.567 36.5309   1
   2  15  11 56.0589 15.9757   1
  -2 -15 -11 88.4807 24.2501   1
  -2 -15 -12 5.43042 17.7579   1
   2  15  12 4.27550 13.6741   1
   2  15  13-4.17302 12.0986   1
  -2 -15 -13 15.1459 16.8661   1
   2  15  14 85.8289 17.0579   1
   2  15  15-0.28580 13.0706   1
  -2 -15 -15-11.6364 18.0414   3
  -2 -15 -16 134.018 26.7520   3
   2  15  16 165.695 21.7224   1
   2  15  17-6.18199 13.2775   1
  -2 -15 -17-17.4830 22.5813   3
   2  15  18 36.9003 15.2655   1
  -2 -15 -18 21.3785 21.9885   3
  -2 -15 -19 679.093 48.7631   3
   2  15  19 663.294 39.4700   1
   2  15  20 132.922 21.2263   1
  -2 -15 -20 104.391 28.5980   3
  -2 -15 -21 153.286 30.4225   3
  -2 -15 -22 9.18419 22.7773   3
   2  16  -6 320.888 27.4696   1
   2  16  -5 301.046 26.5229   1
   2  16  -4 2.09840 14.2191   1
  -2 -16   4 23.1851 26.7421   1
  -2 -16   3 25.9025 26.8486   1
   2  16  -3 16.3039 14.1115   1
  -2 -16   2 50.1630 31.2015   1
   2  16  -2 40.9706 16.2005   1
  -2 -16   1 78.7768 29.5988   1
   2  16  -1 29.4570 14.8700   1
  -2 -16   0 21.3895 24.9987   1
   2  16   0 82.9034 18.7067   1
  -2 -16  -1 47.7603 28.2886   1
   2  16   1 29.7322 15.8616   1
   2  16   2-15.5801 15.6099   1
  -2 -16  -2-20.4826 24.0978   1
   2  16   3 471.256 33.8486   1
  -2 -16  -3 517.271 48.2042   1
   2  16   4 946.195 45.4852   1
  -2 -16  -4 1065.10 64.3481   1
   2  16   5 182.591 23.1677   1
  -2 -16  -5 115.676 27.5008   1
   2  16   6 171.344 22.4415   1
  -2 -16  -6 199.721 33.8101   1
  -2 -16  -7 0.49309 20.6785   1
   2  16   7-15.9382 16.6108   1
  -2 -16  -8 81.5758 26.2565   1
   2  16   8 51.4166 16.8736   1
  -2 -16  -9 16.5397 21.3680   1
   2  16   9-4.45432 13.3465   1
  -2 -16 -10 103.844 26.3928   1
   2  16  10 93.9926 18.6185   1
  -2 -16 -11 15.4157 21.2870   1
   2  16  11 9.14758 12.9534   1
   2  16  12 12.6897 13.8135   1
  -2 -16 -12 17.4481 22.3808   1
   2  16  13 180.142 23.2481   1
   2  16  14 280.766 27.7474   1
  -2 -16 -15 799.217 52.0424   3
   2  16  15 859.363 44.4169   1
  -2 -16 -16 105.854 24.5476   3
   2  16  16 220.362 25.5646   1
  -2 -16 -17 17.4123 22.1447   3
   2  16  17 1.93285 15.0254   1
   2  16  18 6.74845 14.4932   1
  -2 -16 -18 35.4881 22.8489   3
  -2 -16 -19 22.0568 23.1079   3
   2  16  19 54.7216 20.4035   1
   2  16  20 40.9939 18.3571   1
  -2 -16 -20-2.43927 22.2003   3
   2  17   0 633.949 38.8856   1
   2  17   1 74.6628 20.4337   1
  -2 -17  -1 39.6505 28.0129   1
  -2 -17  -2 16.6096 25.1239   1
   2  17   2 6.93513 14.1943   1
  -2 -17  -3 61.1359 28.2897   1
   2  17   3 36.1137 16.9421   1
   2  17   4 9.86285 16.3043   1
  -2 -17  -4-8.11800 24.9850   1
  -2 -17  -5 8.21362 26.0052   1
   2  17   5-6.70190 14.8431   1
   2  17   6 56.5038 17.4997   1
  -2 -17  -6 24.9864 26.3784   1
  -2 -17  -7 9.68380 25.7247   1
   2  17   7-7.54872 16.1685   1
  -2 -17  -8 97.5650 30.1883   1
   2  17   8 46.3460 17.6345   1
  -2 -17  -9 583.130 49.8512   1
   2  17   9 581.742 37.9450   1
  -2 -17 -10 234.474 34.9951   1
   2  17  10 197.478 25.4129   1
  -2 -17 -11 427.260 42.4146   1
   2  17  11 382.925 32.5119   1
   2  17  12 46.5741 17.8161   1
   2  17  13-7.32815 15.1269   1
   2  17  14 38.3540 16.8869   1
   2  17  15 46.7328 17.5644   1
  -2 -17 -15 28.2432 22.9615   3
  -2 -17 -16-41.6416 24.7957   3
   2  17  16 19.2711 17.0948   1
  -2 -17 -17 128.086 30.1862   3
  -2 -18  -8 5.62587 24.3370   1
  -2 -18  -9 51.7237 27.8199   1
  -2 -18 -10-34.4478 26.9096   1
   3 -17 -15 139.537 34.0770   1
   3 -17 -14-12.2829 28.2132   1
   3 -17 -13-24.3459 28.3030   1
   3 -17 -12 10.1022 24.6295   1
   3 -17 -11 384.664 46.0043   1
  -3  17  11 345.212 32.1543   1
  -3  17  10 832.258 45.8314   1
   3 -17 -10 897.335 64.4913   1
  -3  17   9 87.6815 20.3282   1
   3 -17  -9 114.621 35.0454   1
  -3  17   8 1.61539 14.9306   1
   3 -17  -8 3.39174 25.6755   1
  -3  17   7 128.947 21.1625   1
   3 -17  -7 105.413 33.7113   1
   3 -17  -6 3.45115 26.6447   1
  -3  17   6 24.8021 16.6281   1
   3 -17  -5-13.6657 30.2615   1
  -3  17   5 6.42711 14.7593   1
  -3  17   4 105.417 20.0991   1
   3 -17  -4 129.639 34.4451   1
  -3  17   3 80.5601 18.7014   1
  -3  17   2 63.9177 17.1445   1
  -3  17   1 421.360 30.7771   1
  -3  17   0 125.290 20.1986   1
   3 -16 -19 21.6450 21.2537   3
   3 -16 -17 30.8927 24.2893   1
  -3  16  17 55.1845 20.8421   1
   3 -16 -16 130.855 31.5582   1
  -3  16  16 134.543 25.2253   1
   3 -16 -15 213.202 34.3895   1
  -3  16  15 323.914 30.6503   1
  -3  16  14 401.497 33.5396   1
   3 -16 -14 520.872 49.5302   1
   3 -16 -13-17.5066 26.8783   1
  -3  16  13 85.7206 20.3292   1
  -3  16  12-7.61484 16.0464   1
   3 -16 -12 8.93710 24.9095   1
   3 -16 -11 179.578 35.2188   1
  -3  16  11 232.590 26.6284   1
  -3  16  10 80.8486 20.4308   1
   3 -16 -10 2.52209 23.6017   1
  -3  16   9 25.1254 16.2411   1
   3 -16  -9 28.7520 28.8131   1
  -3  16   8 99.7615 19.5113   1
   3 -16  -8 72.7029 30.6348   1
   3 -16  -7-38.4966 27.3644   1
  -3  16   7-14.5103 13.9803   1
   3 -16  -6 251.419 39.8679   1
  -3  16   6 142.559 21.5879   1
  -3  16   5 755.625 40.2748   1
   3 -16  -5 797.151 59.4843   1
   3 -16  -4 176.860 34.8196   1
  -3  16   4 223.801 24.2545   1
  -3  16   3 167.130 22.3919   1
   3 -16  -3 55.1734 26.3927   1
   3 -16  -2-0.30245 24.7812   1
  -3  16   2-21.8723 15.2850   1
   3 -16  -1-6.38772 26.9588   1
  -3  16   1-3.68993 12.5070   1
  -3  16   0-0.12818 13.0760   1
   3 -16   0-18.4008 24.9545   1
  -3  16  -1 20.7010 12.3620   1
   3 -16   1 65.0016 26.8725   1
   3 -16   2 57.5451 32.9723   1
   3 -16   3 53.8040 32.5723   1
   3 -15 -21 347.722 37.2330   3
   3 -15 -20 169.015 28.0929   3
  -3  15  20 217.958 29.2606   1
   3 -15 -19 127.662 26.9229   3
  -3  15  19 135.168 23.7133   1
  -3  15  18 139.976 22.9557   1
  -3  15  17 16.5409 16.0900   1
   3 -15 -17 59.4778 25.7670   1
  -3  15  16 37.5371 16.6308   1
   3 -15 -16 67.2596 23.0896   1
   3 -15 -15 147.351 31.2132   1
  -3  15  15 147.233 23.1851   1
   3 -15 -14 75.9218 26.9514   1
  -3  15  14 96.4579 20.2891   1
  -3  15  13-7.20884 15.2476   1
   3 -15 -13-0.74030 22.3183   1
  -3  15  12 11.8447 14.6583   1
   3 -15 -12 17.8416 22.2948   1
   3 -15 -11 17.8668 22.3838   1
  -3  15  11 47.0268 16.7547   1
  -3  15  10 240.213 25.0811   1
   3 -15 -10 279.553 38.0319   1
  -3  15   9 1223.64 49.6130   1
   3 -15  -9 1207.22 68.6990   1
  -3  15   8 161.854 21.0510   1
   3 -15  -8 179.920 34.3750   1
  -3  15   7-4.40338 13.2970   1
   3 -15  -7 21.0149 23.9348   1
   3 -15  -6 109.547 30.3987   1
  -3  15   6 138.931 21.0730   1
  -3  15   5 1.33210 13.1477   1
   3 -15  -5 34.1045 22.7786   1
   3 -15  -4 25.2367 20.7777   1
  -3  15   4 5.50090 12.4081   1
  -3  15   3 78.0803 16.8472   1
   3 -15  -3 77.5307 25.4276   1
   3 -15  -2-11.4889 22.3053   1
  -3  15   2 33.2854 14.9325   1
  -3  15   1 46.5596 14.8339   1
   3 -15  -1 54.2773 25.9740   1
  -3  15   0 580.873 32.4269   1
   3 -15   0 472.005 47.4542   1
   3 -15   1 146.526 31.4443   1
  -3  15  -1 152.933 19.2713   1
  -3  15  -2 479.918 28.9402   1
   3 -15   2 507.019 49.6760   1
   3 -15   3 70.6518 25.9891   1
   3 -15   4-26.5712 27.3963   1
   3 -15   5 13.5908 24.4227   1
   3 -15   6-28.5201 29.3900   1
   3 -15   7 41.2859 29.9942   1
  -3  14  22 12.9987 16.7250   1
  -3  14  21 36.8459 18.9364   1
   3 -14 -21 13.2402 18.4544   3
   3 -14 -20 105.910 23.8953   3
  -3  14  20 132.115 23.4040   1
  -3  14  19 182.754 25.7754   1
   3 -14 -19 142.384 25.6550   3
   3 -14 -18 162.999 28.6532   1
  -3  14  18 113.679 21.2927   1
  -3  14  17-5.05472 13.3072   1
   3 -14 -17-7.81269 20.3956   1
  -3  14  16 41.6135 16.5293   1
   3 -14 -16 33.7505 22.0561   1
   3 -14 -15 235.333 31.7529   1
  -3  14  15 223.925 24.7906   1
   3 -14 -14 195.546 31.1530   1
  -3  14  14 201.309 24.0787   1
   3 -14 -13 726.795 50.3165   1
  -3  14  13 713.362 38.6709   1
  -3  14  12 69.6932 16.7211   1
   3 -14 -12 93.8225 26.7141   1
  -3  14  11-1.75993 12.7661   1
   3 -14 -11 12.9132 19.7099   1
   3 -14 -10 383.646 41.7990   1
  -3  14  10 377.145 28.6087   1
   3 -14  -9-20.9446 22.0737   1
  -3  14   9 19.1250 12.5192   1
   3 -14  -8-15.5523 24.0205   1
  -3  14   8 22.3961 14.7751   1
   3 -14  -7 47.4819 23.3038   1
  -3  14   7 45.9854 16.3804   1
   3 -14  -6 5.06417 19.8185   1
  -3  14   6-2.13037 12.3671   1
  -3  14   5 156.115 19.8113   1
   3 -14  -5 120.457 26.6493   1
   3 -14  -4 978.582 60.2451   1
  -3  14   4 1038.47 42.4533   1
  -3  14   3 239.738 24.0574   1
   3 -14  -3 229.884 33.6356   1
   3 -14  -2 211.345 32.9656   1
  -3  14   2 210.489 21.3458   1
   3 -14  -1-0.24865 22.0120   1
  -3  14   1 16.0830 12.2571   1
   3 -14   0 9.31061 21.4648   1
  -3  14   0 7.59767 11.7958   1
   3 -14   1 66.5189 23.5142   1
  -3  14  -1 34.3245 13.4764   1
  -3  14  -2-7.15567 11.1533   1
   3 -14   2 23.4242 25.1218   1
  -3  14  -3-3.43770 10.8811   1
   3 -14   3 4.38066 21.6948   1
   3 -14   4 2.61967 20.7039   1
   3 -14   5 81.2619 28.1830   1
   3 -14   6 58.0835 26.2166   1
   3 -14   7 723.639 56.2523   1
   3 -14   8 498.249 48.5050   1
   3 -14   9 102.338 29.7377   1
   3 -14  10 4.43013 23.6964   1
  -3  13  23 18.8601 17.3542   1
  -3  13  22-15.8846 16.3980   1
   3 -13 -21 18.5325 16.9099   3
  -3  13  21 10.0399 14.2338   1
   3 -13 -20 331.648 32.1890   3
  -3  13  20 230.532 26.9635   1
  -3  13  19 332.904 30.4198   1
   3 -13 -19 289.809 30.2276   3
  -3  13  18 117.303 20.7419   1
   3 -13 -18 103.829 23.8237   1
   3 -13 -17 505.110 39.5693   1
  -3  13  17 382.517 29.8731   1
  -3  13  16 30.3346 15.2737   1
   3 -13 -16 12.4770 18.1791   1
  -3  13  15 89.6967 18.5489   1
   3 -13 -15 29.0328 17.6836   1
   3 -13 -14 512.648 41.9578   1
  -3  13  14 350.154 27.7815   1
  -3  13  13 69.3580 16.0627   1
   3 -13 -13 71.7063 23.5022   1
   3 -13 -12-28.2331 24.7038   1
  -3  13  12 9.04037 11.4844   1
   3 -13 -11-31.8378 20.3898   1
  -3  13  11-2.87134 12.0821   1
   3 -13 -10 40.5481 20.9965   1
  -3  13  10 34.1266 12.4826   1
   3 -13  -9 129.107 25.5065   1
  -3  13   9 203.157 21.1188   1
  -3  13   8 1409.99 48.6303   1
   3 -13  -8 1568.44 70.1471   1
  -3  13   7 222.814 21.5808   1
   3 -13  -7 176.857 29.4698   1
  -3  13   6 8.23919 11.5659   1
   3 -13  -6 23.0860 19.8065   1
   3 -13  -5 115.720 23.6148   1
  -3  13   5 158.457 19.2043   1
  -3  13   4-5.74585 11.5366   1
   3 -13  -4-16.0663 20.0326   1
  -3  13   3 40.7676 12.5060   1
   3 -13  -3 64.0669 22.8629   1
  -3  13   2 8.22994 11.2157   1
   3 -13  -2 32.8952 19.5447   1
   3 -13  -1 73.3165 24.0695   1
  -3  13   1 45.5381 13.6978   1
   3 -13   0 14.2953 19.9039   1
  -3  13   0 8.34370 11.3567   1
  -3  13  -1 581.307 29.8422   1
   3 -13   1 563.150 45.0840   1
  -3  13  -2 204.985 19.2150   1
   3 -13   2 142.936 27.4541   1
  -3  13  -3 409.158 24.6594   1
   3 -13   3 371.740 38.9871   1
   3 -13   4 255.615 33.4186   1
  -3  13  -4 312.349 21.1396   1
  -3  13  -5 10.8534 10.2752   2
   3 -13   5 16.1559 20.9435   1
  -3  13  -6 81.8705 14.7162   2
   3 -13   6 91.0179 26.7537   1
  -3  13  -7 49.7869 12.6312   2
   3 -13   7 67.9613 26.2676   1
  -3  13  -8 33.1990 12.4561   2
   3 -13   8 22.3341 21.5112   1
   3 -13   9 80.1153 27.7962   1
  -3  13  -9 33.4794 12.8360   2
  -3  13 -10-7.80533 13.0575   2
   3 -13  10-12.5379 20.6213   1
  -3  13 -11 2.41399 11.0765   2
   3 -13  11-37.0228 28.2703   1
  -3  13 -12 317.654 26.7820   2
  -3  12  25 20.2411 20.2882   1
  -3  12  24 443.267 37.3483   1
  -3  12  23 256.167 28.2858   1
  -3  12  22-5.04604 14.3825   1
   3 -12 -21 20.9907 17.4821   3
  -3  12  21 1.12844 15.3222   1
  -3  12  20 45.4386 17.3666   1
   3 -12 -20 34.6910 17.5604   3
   3 -12 -19 155.483 24.5447   3
  -3  12  19 114.538 20.1124   1
   3 -12 -18 293.991 28.5416   3
  -3  12  18 335.817 28.1397   1
   3 -12 -18 357.942 31.9658   1
   3 -12 -17 108.606 23.0075   1
  -3  12  17 72.9827 16.8200   1
  -3  12  16 24.3690 13.6787   1
   3 -12 -16 17.6565 16.1637   1
  -3  12  15 7.32759 11.6636   1
   3 -12 -15 8.10691 16.9566   1
  -3  12  14 227.658 22.7298   1
   3 -12 -14 192.566 28.5469   1
  -3  12  13 107.662 16.2478   1
   3 -12 -13 179.726 27.3641   1
   3 -12 -12 1854.91 71.1613   1
  -3  12  12 1810.45 54.1395   1
  -3  12  11 93.6983 16.7975   1
   3 -12 -11 84.4648 22.9227   1
  -3  12  10 14.8945 11.1507   1
   3 -12 -10 17.7947 18.7008   1
  -3  12   9 665.676 32.8551   1
   3 -12  -9 655.905 45.2921   1
  -3  12   8 3.35182 10.4934   1
   3 -12  -8-4.73836 17.3160   1
   3 -12  -7 61.7833 20.9600   1
  -3  12   7 60.7014 13.5524   1
  -3  12   6 38.3727 12.1101   1
   3 -12  -6 32.2249 19.5309   1
  -3  12   5-2.96040 10.1223   1
   3 -12  -5 12.1587 19.4195   1
  -3  12   4 140.428 16.8332   1
   3 -12  -4 161.033 27.0836   1
   3 -12  -3 1801.00 70.6804   1
  -3  12   3 1825.56 49.9325   1
  -3  12   2 400.961 24.7404   1
   3 -12  -2 389.365 36.6647   1
  -3  12   1 253.717 20.0314   1
   3 -12  -1 237.376 29.9769   1
  -3  12   0 5.07222 8.50003   2
  -3  12   0 14.5835 9.50584   1
   3 -12   1-11.9207 18.5834   1
  -3  12  -1-0.33792 8.63255   2
  -3  12  -1 15.1862 10.2466   1
   3 -12   2 105.249 23.4168   1
  -3  12  -2 116.171 14.1767   2
  -3  12  -2 104.669 14.9173   1
  -3  12  -3 105.320 14.3290   1
   3 -12   3 64.2490 22.1521   1
  -3  12  -3 91.1656 14.1343   2
  -3  12  -4 23.2441 9.55569   1
   3 -12   4-9.67899 18.4077   1
  -3  12  -4 4.23252 9.10896   2
  -3  12  -5 13.5731 9.21692   2
   3 -12   5 33.4557 19.1923   1
  -3  12  -5 25.4683 9.28079   1
  -3  12  -6 81.7807 13.8542   2
   3 -12   6 34.0193 20.0512   1
   3 -12   7 37.3154 21.5660   1
  -3  12  -7 34.7581 11.4737   2
  -3  12  -8 488.398 27.8621   2
   3 -12   8 552.526 43.6462   1
  -3  12  -9 802.225 36.2497   2
   3 -12   9 827.062 52.9253   1
   3 -12  10 90.2605 25.1871   1
  -3  12 -10 114.150 17.5291   2
   3 -12  11 3.86609 21.5152   1
  -3  12 -11 4.19238 11.8825   2
  -3  12 -12 74.2194 15.9507   2
  -3  12 -13 179.990 21.8797   2
  -3  12 -14 63.5342 16.8919   2
   3 -11 -26 13.0030 21.2628   2
   3 -11 -25 230.271 32.6894   2
  -3  11  25 331.272 32.7708   1
  -3  11  24 61.4045 19.9969   1
   3 -11 -24 22.5061 20.0397   2
  -3  11  23 80.8002 20.7806   1
   3 -11 -23 140.628 24.7627   2
  -3  11  22 157.594 22.5292   1
  -3  11  21 13.2091 15.6078   1
   3 -11 -21-7.43806 15.1260   3
   3 -11 -20 18.8458 14.8885   3
  -3  11  20-3.82108 13.8108   1
  -3  11  19 295.525 26.6951   1
   3 -11 -19 323.849 28.3928   3
   3 -11 -18 396.239 30.9045   1
   3 -11 -18 372.918 29.6935   3
  -3  11  18 368.181 28.7343   1
   3 -11 -17 24.3167 16.1378   1
  -3  11  17 32.6794 14.1769   1
   3 -11 -16 558.458 38.3493   1
  -3  11  16 511.558 31.0560   1
   3 -11 -15 61.4334 18.8349   1
  -3  11  15 60.2300 14.6840   1
   3 -11 -14 119.353 22.6667   1
  -3  11  14 68.2757 14.4310   1
  -3  11  13 1046.63 40.9034   1
   3 -11 -13 1132.20 54.2501   1
   3 -11 -12 38.5529 17.2246   1
  -3  11  12 62.3060 13.4539   1
   3 -11 -11 25.7268 16.5250   1
  -3  11  11 9.13138 10.1681   1
  -3  11  10 53.8324 12.3178   1
   3 -11 -10 54.1575 19.4854   1
  -3  11   9 43.8795 12.3733   1
   3 -11  -9 54.8558 18.7643   1
   3 -11  -8 164.065 24.6174   1
  -3  11   8 177.146 18.6360   1
  -3  11   7 2511.41 57.0983   1
   3 -11  -7 2437.88 77.4198   1
  -3  11   6 166.323 17.6668   1
   3 -11  -6 181.451 25.2371   1
   3 -11  -5 31.7086 18.0740   1
  -3  11   5 4.43626 9.34075   1
  -3  11   4 188.423 17.6208   1
   3 -11  -4 139.252 23.2500   1
   3 -11  -3 26.3998 16.8210   1
  -3  11   3 4.19219 6.79217   2
  -3  11   3 11.8615 8.81436   1
  -3  11   2 65.7490 10.0265   2
   3 -11  -2 60.7812 18.2642   1
  -3  11   2 77.4719 13.1899   1
   3 -11  -1 17.0418 15.0298   1
  -3  11   1-3.70082 9.60922   1
  -3  11   0 7.25873 8.82241   1
   3 -11   0-17.2107 18.0017   1
  -3  11   0 9.49386 7.35186   2
  -3  11  -1 13.3035 9.50152   1
   3 -11   1 11.2114 15.9469   1
  -3  11  -1 14.8331 7.68962   2
  -3  11  -2 517.005 24.7233   1
  -3  11  -2 567.674 25.2542   2
   3 -11   2 470.210 36.6562   1
  -3  11  -3 78.5651 12.3113   1
  -3  11  -3 131.380 13.6709   2
   3 -11   3 125.741 23.9727   1
  -3  11  -4 565.836 26.1644   2
   3 -11   4 529.087 38.8096   1
  -3  11  -4 527.542 24.3925   1
  -3  11  -5 808.929 31.2822   2
  -3  11  -5 818.232 28.6723   1
  -3  11  -6 7.41133 8.82965   2
   3 -11   6 7.71500 17.2453   1
  -3  11  -6 16.8371 8.76199   1
  -3  11  -7 28.4170 10.1977   2
   3 -11   7 38.1664 18.8880   1
   3 -11   8 138.004 25.5988   1
  -3  11  -8 85.4315 13.8872   2
  -3  11  -9 61.3896 12.8478   2
   3 -11   9 61.9858 22.7226   1
  -3  11 -10 73.7051 15.0373   2
   3 -11  10 38.8917 19.3751   1
  -3  11 -11 10.5220 11.0834   2
   3 -11  11-21.3043 20.1650   1
  -3  11 -12 1.01905 10.9247   2
  -3  11 -13 336.245 25.4312   2
  -3  11 -14 1001.74 41.9843   2
  -3  11 -15 253.655 23.6835   2
   3 -10 -26 30.4283 21.4205   2
   3 -10 -25 21.3506 19.4686   2
  -3  10  25 50.8630 18.5672   1
  -3  10  24-6.67888 15.4103   1
   3 -10 -24 29.4172 18.8566   2
  -3  10  23 337.898 30.0142   1
   3 -10 -23 414.505 35.4588   2
   3 -10 -22 237.216 28.7539   2
  -3  10  22 275.986 27.2943   1
  -3  10  21 7.34948 13.2488   1
  -3  10  20 0.84003 13.1410   1
   3 -10 -20 4.78575 13.8596   3
   3 -10 -19 50.3498 15.6348   1
   3 -10 -19 6.01964 12.7474   3
  -3  10  19 16.4163 13.6381   1
   3 -10 -18 123.689 19.3648   3
  -3  10  18 150.114 19.6484   1
   3 -10 -18 175.609 22.2022   1
  -3  10  17 652.795 34.2130   1
   3 -10 -17 625.452 34.5310   3
   3 -10 -17 580.073 35.9444   1
   3 -10 -16 9.26063 14.1972   1
  -3  10  16 20.1447 11.7791   1
   3 -10 -15 67.0837 17.5510   1
  -3  10  15 63.6721 14.0016   1
  -3  10  14-0.96170 10.0334   1
   3 -10 -14-14.8697 16.0557   1
   3 -10 -13 125.357 21.1256   1
  -3  10  13 138.519 16.6606   1
   3 -10 -12 25.5828 17.9442   1
  -3  10  12 27.4030 11.0815   1
   3 -10 -11 2804.47 79.1322   1
  -3  10  11 2697.92 59.4454   1
   3 -10 -10 168.495 24.7043   1
  -3  10  10 156.460 16.4735   1
  -3  10   9 31.9805 10.6430   1
   3 -10  -9 57.9030 17.4280   1
  -3  10   8 1426.79 42.0444   1
   3 -10  -8 1682.46 61.7056   1
   3 -10  -7-7.82094 15.1261   1
  -3  10   7 4.53054 9.15520   1
  -3  10   6 134.896 14.9158   1
   3 -10  -6 143.857 22.3391   1
   3 -10  -5 6.28332 14.4005   1
  -3  10   5 2.58680 6.10213   2
  -3  10   5 7.17650 9.67634   1
   3 -10  -4-2.66163 14.7122   1
  -3  10   4 3.43509 8.67751   1
  -3  10   4-7.72231 6.62393   2
  -3  10   3 78.7443 10.0168   2
  -3  10   3 107.168 13.6712   1
   3 -10  -3 90.0833 19.7164   1
   3 -10  -2 1728.45 61.4347   1
  -3  10   2 1791.51 38.7748   2
  -3  10   2 1732.11 43.0084   1
  -3  10   1 276.481 16.4669   2
   3 -10  -1 282.674 27.0513   1
  -3  10   1 262.316 18.0558   1
  -3  10   0 118.844 11.7596   2
   3 -10   0 147.261 21.9560   1
  -3  10   0 149.285 14.3373   1
  -3  10  -1 43.9908 8.71418   2
  -3  10  -1 43.8226 9.90337   1
   3 -10   1 63.2993 17.7510   1
   3 -10   2-2.49222 14.2952   1
  -3  10  -2-0.06890 6.89876   2
  -3  10  -2 0.43273 7.38695   1
  -3  10  -3 76.5354 11.2937   1
   3 -10   3 77.2078 18.9684   1
  -3  10  -3 84.0130 11.1810   2
  -3  10  -4 134.575 13.4587   2
   3 -10   4 114.019 19.5562   1
  -3  10  -5 28.6237 9.45248   2
  -3  10  -5 20.3933 8.04426   1
   3 -10   5 13.1592 14.0726   1
   3 -10   6 10.9356 15.0894   1
  -3  10  -6 17.9186 9.06718   2
  -3  10  -6 9.69535 7.56137   1
  -3  10  -7 87.6249 12.4309   2
   3 -10   7 92.1425 20.2597   1
  -3  10  -8 4.76132 7.91436   2
   3 -10   8-19.6611 17.0194   1
  -3  10  -9 418.409 24.3101   2
   3 -10   9 450.157 35.5505   1
  -3  10 -10 1136.31 39.1004   2
   3 -10  10 1193.26 55.8036   1
  -3  10 -11 126.860 16.1021   2
   3 -10  11 103.303 21.8089   1
  -3  10 -12 19.0270 10.8177   2
  -3  10 -13 161.315 18.0960   2
  -3  10 -14 260.482 22.1034   2
  -3  10 -15-9.51359 12.8586   2
  -3  10 -16 50.7639 15.2831   2
  -3  10 -17 22.2222 12.6454   2
   3  -9 -26 134.529 26.1800   2
   3  -9 -25 59.8706 22.0574   2
  -3   9  24 165.204 22.5945   1
   3  -9 -24 150.656 26.6432   2
  -3   9  23 4.90096 15.7426   1
   3  -9 -23-5.58581 15.4343   2
   3  -9 -22 170.344 25.8692   2
  -3   9  22 148.184 21.3831   1
   3  -9 -21 298.740 29.8363   2
  -3   9  21 287.213 26.4889   1
  -3   9  20 0.53592 12.3001   1
   3  -9 -20-13.9950 14.5235   3
   3  -9 -19-12.7044 13.6142   3
  -3   9  19 19.5817 12.2580   1
   3  -9 -19-4.33184 11.9561   1
  -3   9  18 178.679 20.0262   1
   3  -9 -18 127.539 18.5087   1
   3  -9 -18 185.397 20.4601   3
   3  -9 -17 400.220 26.6641   3
  -3   9  17 439.437 28.0412   1
   3  -9 -17 478.052 31.6944   1
   3  -9 -16-13.4588 14.1508   1
  -3   9  16-11.5745 11.2593   1
   3  -9 -15 1280.45 50.7852   1
  -3   9  15 1215.55 42.0369   1
  -3   9  14 46.9867 11.8514   1
   3  -9 -14 30.9306 14.3535   1
   3  -9 -13 57.0391 16.2362   1
  -3   9  13 78.5934 13.8134   1
   3  -9 -12 2216.91 68.3723   1
  -3   9  12 2197.07 52.4313   1
   3  -9 -11 42.3762 15.6722   1
  -3   9  11 29.8315 9.91054   1
   3  -9 -10 104.792 19.3705   1
  -3   9  10 77.7885 12.0654   1
   3  -9  -9 28.8093 14.1819   1
  -3   9   9 24.5264 9.96593   1
   3  -9  -8 59.4338 16.5219   1
  -3   9   8 86.6741 12.6403   1
  -3   9   7 42.0530 7.81260   2
  -3   9   7 53.5600 10.6440   1
   3  -9  -7 48.3207 16.3915   1
  -3   9   6 2970.95 55.8124   1
   3  -9  -6 2884.90 74.8868   1
  -3   9   6 3032.74 46.5295   2
  -3   9   5 266.858 14.7984   2
  -3   9   5 310.126 19.2976   1
   3  -9  -5 266.158 25.3617   1
   3  -9  -4 39.5839 15.0778   1
  -3   9   4 19.8778 6.19667   2
  -3   9   4 22.4600 8.39753   1
  -3   9   3 214.148 16.1101   1
   3  -9  -3 273.322 25.3753   1
  -3   9   3 228.989 13.9927   2
   3  -9  -2 7.33214 12.4152   1
  -3   9   2-0.77400 8.19787   1
  -3   9   2 12.9806 6.25296   2
  -3   9   1 94.4577 10.0118   2
   3  -9  -1 132.726 19.4507   1
  -3   9   1 114.448 12.3580   1
   3  -9   0 68.7864 16.3640   1
  -3   9   0 110.697 11.7628   1
  -3   9   0 110.865 10.7178   2
  -3   9  -1 3.74723 5.99351   2
  -3   9  -1 0.06583 6.87212   1
   3  -9   1 4.86735 11.5521   1
  -3   9  -2 8.19088 6.28328   2
  -3   9  -2 20.0366 7.74500   1
   3  -9   2 22.9240 13.6314   1
  -3   9  -3 664.881 24.7164   2
   3  -9   3 602.697 34.6875   1
  -3   9  -3 643.864 24.0288   1
   3  -9   4 68.7971 16.2461   1
  -3   9  -4 101.506 11.5922   2
  -3   9  -4 88.8541 10.4216   1
   3  -9   5 530.022 33.2026   1
  -3   9  -5 466.482 19.7754   1
  -3   9  -5 445.963 21.4489   2
  -3   9  -6 782.003 24.0595   1
   3  -9   6 872.196 42.3668   1
  -3   9  -6 849.475 29.3970   2
  -3   9  -7-8.46466 5.86296   1
  -3   9  -7 14.0582 7.88704   2
   3  -9   8 78.6589 18.1773   1
  -3   9  -8 88.8828 12.0286   2
  -3   9  -9 457.213 23.9580   2
   3  -9   9 370.346 30.3744   1
  -3   9 -10 134.507 14.8570   2
   3  -9  10 115.928 19.9223   1
  -3   9 -11 38.2496 10.7403   2
   3  -9  11 6.49618 14.2114   1
  -3   9 -12-12.3802 10.5673   2
  -3   9 -13 8.19137 9.76412   2
  -3   9 -14 128.125 16.4089   2
  -3   9 -15 1179.78 42.7458   2
  -3   9 -16 243.221 21.9524   2
  -3   9 -17 9.33581 11.9115   2
  -3   9 -18 2.65719 13.0256   2
   3  -8 -27 63.0523 23.3203   2
   3  -8 -26 53.3854 20.2914   2
   3  -8 -25 10.3979 17.8617   2
   3  -8 -24 31.2638 18.1940   2
  -3   8  24 26.0777 15.7756   1
  -3   8  23 14.3875 13.6393   1
   3  -8 -23 7.91773 15.5707   2
  -3   8  22 258.896 26.5481   1
   3  -8 -22 229.220 27.8208   2
  -3   8  21 293.821 25.5754   1
   3  -8 -21 251.505 27.6511   2
  -3   8  20 33.9445 13.6036   1
   3  -8 -20 40.1632 14.9667   2
  -3   8  19 50.8372 14.0984   1
   3  -8 -19 31.8114 14.5445   2
   3  -8 -19 30.5447 11.0025   1
   3  -8 -19 49.9693 14.3231   3
  -3   8  18 49.3590 13.5208   1
   3  -8 -18 32.6211 12.5193   3
   3  -8 -18 36.5160 12.5555   1
   3  -8 -17 70.6043 14.4519   3
   3  -8 -17 81.8358 14.9999   1
  -3   8  17 51.0199 13.0104   1
   3  -8 -16 1674.11 53.8803   1
  -3   8  16 1616.44 48.3850   1
   3  -8 -16 1640.96 47.4901   3
  -3   8  15 65.7139 13.8454   1
   3  -8 -15 66.9369 16.2536   1
   3  -8 -14 37.2756 14.3831   1
  -3   8  14 34.3324 11.0193   1
  -3   8  13 22.6630 10.7278   1
   3  -8 -13 7.08879 12.6851   1
   3  -8 -12 202.458 23.0794   1
  -3   8  12 180.946 16.3563   1
   3  -8 -11-18.5748 13.6751   1
  -3   8  11 2.18920 7.59513   1
  -3   8  10 3142.09 57.7262   1
   3  -8 -10 3068.40 74.9786   1
   3  -8  -9 322.344 26.8795   1
  -3   8   9 291.042 18.5723   1
  -3   8   8 32.0193 8.81250   1
   3  -8  -8 46.8701 15.3834   1
  -3   8   8 38.5092 7.04365   2
  -3   8   7 1657.65 40.2996   1
  -3   8   7 1785.34 33.7530   2
   3  -8  -7 1715.80 55.8852   1
  -3   8   6 9.45329 5.38519   2
   3  -8  -6 12.2721 11.4168   1
  -3   8   6 8.58251 7.54572   1
  -3   8   5 151.514 13.4515   1
  -3   8   5 169.836 11.3382   2
   3  -8  -5 150.180 18.9844   1
   3  -8  -4 20.5742 11.5518   1
  -3   8   4 37.4580 9.05449   1
  -3   8   4 32.1797 6.28770   2
  -3   8   3 15.8671 7.35268   1
   3  -8  -3 23.3379 12.1701   1
  -3   8   3 18.1768 5.66534   2
  -3   8   2 25.0284 6.12082   2
  -3   8   2 23.4120 7.42559   1
   3  -8  -2 18.9795 11.7637   1
  -3   8   1 2305.25 38.9327   2
   3  -8  -1 2260.30 60.0677   1
  -3   8   1 2152.41 42.2143   1
  -3   8   0 247.671 13.7633   2
   3  -8   0 223.522 21.6773   1
  -3   8   0 247.769 15.4471   1
  -3   8  -1 140.347 11.0751   2
   3  -8   1 163.744 19.3971   1
  -3   8  -1 153.723 12.4648   1
   3  -8   2 265.517 22.7605   1
  -3   8  -2 279.703 15.0819   2
  -3   8  -2 301.596 16.3129   1
  -3   8  -3 10.5889 5.89647   2
  -3   8  -3 15.4902 6.90654   1
   3  -8   3 7.95812 10.5105   1
  -3   8  -4 208.110 14.4640   2
  -3   8  -4 194.682 13.0321   1
   3  -8   4 191.962 19.8684   1
   3  -8   5 873.880 38.4803   1
  -3   8  -5 884.592 24.6083   1
  -3   8  -5 830.875 26.7396   2
  -3   8  -6 90.9229 10.8856   2
  -3   8  -6 82.2063 8.75070   1
   3  -8   6 95.3787 15.9482   1
  -3   8  -7-1.21195 4.66375   1
  -3   8  -7 8.18951 7.04063   2
   3  -8   7 0.36522 10.6924   1
  -3   8  -8 36.0182 8.80224   2
   3  -8   8 55.1703 15.7932   1
  -3   8  -9 4.47277 7.30550   2
   3  -8   9-1.82238 11.3175   1
   3  -8  10 456.039 30.7592   1
  -3   8 -10 429.623 22.8201   2
   3  -8  11 1702.56 57.5990   1
  -3   8 -11 1614.50 42.9723   2
  -3   8 -12 231.304 18.3021   2
  -3   8 -13 11.0421 10.5826   2
  -3   8 -14 87.7660 13.6778   2
  -3   8 -15 250.280 20.7487   2
  -3   8 -16-5.17899 9.61536   2
  -3   8 -17-9.48337 12.0005   2
  -3   8 -18-6.62340 11.4127   2
  -3   8 -19 24.6616 13.1250   2
   3  -7 -27 109.614 24.8366   2
   3  -7 -26 274.463 31.9919   2
   3  -7 -25 68.0028 21.8012   2
  -3   7  24 26.4659 16.0548   1
   3  -7 -24 42.3978 19.7726   2
   3  -7 -23 116.172 22.8042   2
  -3   7  23 151.064 21.4825   1
   3  -7 -22 2.32940 14.2199   2
  -3   7  22 9.46393 13.0359   1
   3  -7 -21 76.0922 18.0332   2
  -3   7  21 60.3700 15.1483   1
   3  -7 -20 559.541 35.7431   2
  -3   7  20 579.552 33.5083   1
   3  -7 -19-2.17989 10.9527   3
  -3   7  19 3.31038 10.9738   1
   3  -7 -18-6.33657 9.88761   3
  -3   7  18 11.7646 11.5993   1
   3  -7 -18 3.96199 10.0577   1
   3  -7 -18 10.8581 11.7693   2
   3  -7 -17 32.2973 12.0304   1
   3  -7 -17 27.8528 11.5656   3
  -3   7  17 19.6147 10.2592   1
  -3   7  16 262.481 20.9938   1
   3  -7 -16 254.993 19.7624   3
   3  -7 -16 321.096 24.1019   1
  -3   7  15 42.1677 11.4890   1
   3  -7 -15 54.3787 14.4360   1
   3  -7 -15 33.1193 9.72852   3
   3  -7 -14 925.968 39.4844   1
  -3   7  14 975.060 34.6840   1
   3  -7 -13 10.1874 11.1932   1
  -3   7  13 14.8696 9.45885   1
   3  -7 -12 62.3827 15.6727   1
  -3   7  12 47.8784 10.4727   1
   3  -7 -11 3239.52 73.7957   1
  -3   7  11 3136.00 56.7769   1
   3  -7 -10 26.7241 13.0004   1
  -3   7  10 19.5090 8.47518   1
  -3   7   9 193.555 12.0254   2
   3  -7  -9 226.867 21.7417   1
  -3   7   9 198.855 15.2107   1
   3  -7  -8 14.4258 12.4278   1
  -3   7   8 23.6513 7.92702   1
  -3   7   8 21.4594 5.34565   2
  -3   7   7 106.779 11.2961   1
   3  -7  -7 85.2216 15.1400   1
  -3   7   7 99.6844 8.57376   2
  -3   7   6 46.7015 6.68309   2
  -3   7   6 55.0453 9.19204   1
   3  -7  -6 34.4628 12.4834   1
  -3   7   5 6970.57 74.6597   1
  -3   7   5 6978.10 62.3412   2
   3  -7  -5 6799.65 100.810   1
  -3   7   4 361.020 14.6632   2
   3  -7  -4 334.428 24.4598   1
  -3   7   4 369.115 17.8071   1
   3  -7  -3 33.1288 11.7174   1
  -3   7   3 39.9860 8.35239   1
  -3   7   3 22.4278 5.36126   2
  -3   7   2 346.821 14.4860   2
   3  -7  -2 387.690 24.8064   1
  -3   7   2 362.287 17.1727   1
  -3   7   1 21.5151 7.35002   1
  -3   7   1-0.08409 4.46937   2
   3  -7  -1 14.3554 10.4926   1
  -3   7   0 256.101 12.9042   2
   3  -7   0 223.427 19.0950   1
  -3   7   0 195.162 12.8690   1
   3  -7   1 1320.41 42.2359   1
  -3   7  -1 1259.58 27.4660   2
  -3   7  -1 1340.33 30.4258   1
  -3   7  -2 7.10660 5.32943   2
  -3   7  -2 10.5522 5.87042   1
   3  -7   2 2.51540 9.70453   1
  -3   7  -3 2.85482 5.14405   2
   3  -7   3 13.7318 9.53329   1
  -3   7  -3-2.87970 5.00848   1
   3  -7   4 499.615 27.2040   1
  -3   7  -4 468.917 18.5099   2
  -3   7  -4 517.539 18.0487   1
  -3   7  -5 24.5901 6.84104   2
  -3   7  -5 21.5643 5.83224   1
   3  -7   5 22.5578 9.26045   1
   3  -7   6 207.534 18.7239   1
  -3   7  -6 279.811 12.5515   1
  -3   7  -6 252.954 14.7994   2
  -3   7  -7 1400.26 33.8783   2
   3  -7   7 1340.93 43.7978   1
  -3   7  -7 1361.09 23.9181   1
  -3   7  -8 18.0231 7.99062   2
   3  -7   8 19.4339 11.1353   1
  -3   7  -9 36.1498 8.51008   2
   3  -7   9 33.6376 11.2289   1
  -3   7 -10 787.068 27.9939   2
   3  -7  10 753.932 35.5536   1
   3  -7  11 302.919 24.4474   1
  -3   7 -11 284.942 18.3603   2
  -3   7 -12 16.8954 8.41579   2
  -3   7 -13 3.98079 8.67143   2
  -3   7 -14-4.73136 9.40775   2
  -3   7 -15 164.993 16.6459   2
  -3   7 -16 945.218 35.9687   2
  -3   7 -17 72.4387 14.0672   2
  -3   7 -18 29.1105 12.0145   2
  -3   7 -19 5.18824 11.3784   2
  -3   7 -20 146.654 17.9714   2
   3  -6 -27 413.210 36.6688   2
   3  -6 -26 5.31036 18.8216   2
   3  -6 -25 53.2347 19.1943   2
   3  -6 -24 166.259 25.6169   2
   3  -6 -23 18.7066 17.0776   2
  -3   6  23 43.6605 14.6389   1
  -3   6  22 95.4903 17.3670   1
   3  -6 -22 61.7411 18.7854   2
  -3   6  21 229.586 23.0737   1
   3  -6 -21 205.088 23.8232   2
  -3   6  20 161.752 19.5355   1
   3  -6 -20 171.805 22.1064   2
   3  -6 -19 69.2278 15.9508   2
  -3   6  19 130.725 17.3121   1
   3  -6 -18 103.615 13.1789   1
  -3   6  18 73.1147 13.9457   1
   3  -6 -18 82.5484 12.9138   3
   3  -6 -18 95.5107 17.5191   2
  -3   6  17 14.9268 10.4325   1
   3  -6 -17-1.45883 12.4338   2
   3  -6 -17 4.68098 8.88103   3
   3  -6 -17-3.28122 10.0765   1
   3  -6 -16 24.4160 10.7013   1
   3  -6 -16 12.2577 8.92405   3
  -3   6  16 15.3910 9.14060   1
  -3   6  15 1695.43 45.8662   1
   3  -6 -15 1649.49 42.0020   3
   3  -6 -15 1617.93 48.0598   1
   3  -6 -14 0.57833 7.89069   3
   3  -6 -14-5.97042 10.8027   1
  -3   6  14-7.50064 8.56471   1
   3  -6 -13 11.1286 10.5232   1
  -3   6  13 29.3876 10.0561   1
   3  -6 -12 96.8183 15.8126   1
  -3   6  12 79.7258 11.0414   1
  -3   6  11 208.178 15.2717   1
   3  -6 -11 163.280 18.6733   1
  -3   6  10 9.32015 6.66032   1
  -3   6  10 9.22080 4.41764   2
   3  -6 -10 13.1914 12.2614   1
  -3   6   9 2755.94 38.5618   2
   3  -6  -9 2659.09 62.8175   1
  -3   6   9 2665.76 47.9741   1
   3  -6  -8 120.037 16.3009   1
  -3   6   8 100.535 8.16374   2
  -3   6   8 133.749 11.8797   1
  -3   6   7 51.7225 6.39588   2
   3  -6  -7 56.9286 14.2290   1
  -3   6   7 37.8038 8.13180   1
  -3   6   6 3056.13 38.7185   2
   3  -6  -6 2813.26 62.4807   1
  -3   6   6 2870.89 46.3470   1
   3  -6  -5 15.8105 11.0641   1
  -3   6   5 5.62589 4.04546   2
  -3   6   5 1.97212 5.60998   1
  -3   6   4 109.892 10.4498   1
  -3   6   4 131.390 8.72736   2
   3  -6  -4 91.9574 14.0202   1
  -3   6   3 151.035 9.28301   2
   3  -6  -3 135.974 15.3007   1
  -3   6   3 180.522 12.1539   1
  -3   6   2 1.88190 4.28524   2
   3  -6  -2 5.69069 9.72444   1
  -3   6   2 6.08544 5.67986   1
   3  -6  -1-2.37707 8.19323   1
  -3   6   1 0.04624 5.22785   1
  -3   6   1-2.68031 4.05998   2
  -3   6   0 1696.93 28.7843   2
   3  -6   0 1732.19 44.7366   1
  -3   6   0 1696.42 32.0344   1
  -3   6  -1 188.352 11.5366   1
  -3   6  -1 208.429 10.8670   2
   3  -6   1 214.214 17.1186   1
  -3   6  -2 146.815 9.80712   2
  -3   6  -2 159.097 10.3180   1
   3  -6   2 138.790 14.3251   1
  -3   6  -3 662.282 19.6267   2
  -3   6  -3 671.203 19.2255   1
   3  -6   3 725.713 29.0139   1
  -3   6  -4 3.86411 4.68491   2
  -3   6  -4 2.75690 4.25499   1
   3  -6   4-6.26725 7.55123   1
  -3   6  -5 216.059 12.5876   2
   3  -6   5 199.109 16.4529   1
  -3   6  -5 214.521 10.5428   1
   3  -6   6 2019.00 47.8023   1
  -3   6  -6 1951.62 27.3383   1
  -3   6  -6 1870.59 35.3794   2
  -3   6  -7 110.539 10.2867   2
  -3   6  -7 98.7163 6.10857   1
   3  -6   7 118.979 14.2585   1
  -3   6  -8 9.46716 6.51409   2
   3  -6   8 16.0589 9.96199   1
   3  -6   9 79.8922 12.8010   1
  -3   6  -9 53.1757 8.56168   2
  -3   6 -10 18.1339 8.00552   2
   3  -6  10 13.6624 9.45030   1
   3  -6  11 354.988 23.7216   1
  -3   6 -11 375.247 19.6574   2
  -3   6 -12 2631.61 50.6431   2
  -3   6 -13 182.098 16.3195   2
  -3   6 -14 15.8156 8.61114   2
  -3   6 -15 458.430 24.8296   2
  -3   6 -16 257.983 19.6640   2
  -3   6 -17 8.87788 10.4111   2
  -3   6 -18 32.8328 11.4878   2
  -3   6 -19 13.2034 11.4626   2
  -3   6 -20-10.0398 13.3880   2
  -3   6 -21 584.805 32.0005   2
   3  -5 -27 114.908 25.0083   2
   3  -5 -26 156.119 25.6404   2
   3  -5 -25 139.659 24.0046   2
   3  -5 -24 117.212 22.5137   2
   3  -5 -23 21.6084 15.7278   2
  -3   5  23 36.6492 15.2268   1
   3  -5 -22 164.816 22.6004   2
  -3   5  22 179.396 21.6617   1
   3  -5 -21 61.4769 17.5891   2
  -3   5  21 30.5622 13.8085   1
   3  -5 -20 6.33015 13.1522   2
  -3   5  20-7.46172 11.8862   1
  -3   5  19 905.626 38.6188   1
   3  -5 -19 1006.03 43.8560   2
   3  -5 -18 2.39590 11.2288   2
   3  -5 -18 12.3822 8.85192   3
  -3   5  18-0.10730 10.2118   1
   3  -5 -18 12.1123 9.12228   1
   3  -5 -17 7.27940 10.2144   2
  -3   5  17 10.5422 10.2317   1
   3  -5 -17-10.6543 9.45890   1
   3  -5 -17-0.31423 7.96561   3
   3  -5 -16-3.39593 8.64604   1
   3  -5 -16-6.07275 8.43096   3
  -3   5  16 0.37389 9.16723   1
   3  -5 -16 2.36952 10.1062   2
  -3   5  15 202.036 17.2227   1
   3  -5 -15 180.260 17.2445   1
   3  -5 -15 148.050 13.7456   3
   3  -5 -15 152.500 17.3137   2
  -3   5  14 244.154 18.1278   1
   3  -5 -14 253.974 19.8107   1
   3  -5 -14 262.338 16.5389   3
   3  -5 -13 1349.08 33.9350   3
  -3   5  13 1399.26 38.3194   1
   3  -5 -13 1431.07 44.2588   1
  -3   5  12 14.2808 7.63339   1
   3  -5 -12 16.7363 10.4903   1
  -3   5  11 11.5181 7.08889   1
  -3   5  11 13.2067 4.81857   2
   3  -5 -11 16.7628 11.2239   1
  -3   5  10 2614.82 37.3608   2
  -3   5  10 2548.44 46.5370   1
   3  -5 -10 2490.60 58.2357   1
  -3   5   9 38.8995 6.01097   2
   3  -5  -9 46.2435 12.0344   1
  -3   5   9 55.4497 8.49417   1
   3  -5  -8 75.9895 13.4869   1
  -3   5   8 69.7647 6.82915   2
  -3   5   8 75.3164 9.61225   1
  -3   5   7 53.0145 7.81253   1
  -3   5   7 70.0412 7.01189   2
  -3   5   6 58.7084 7.91514   1
   3  -5  -6 50.1080 11.7377   1
  -3   5   6 29.7944 5.40338   2
  -3   5   5 2.40457 3.56132   2
   3  -5  -5 9.84513 8.94343   1
  -3   5   5-4.60159 5.64702   1
   3  -5  -4 2951.19 57.7801   1
  -3   5   4 3185.34 44.0091   1
  -3   5   4 3073.66 35.8847   2
   3  -5  -3 123.719 14.4641   1
  -3   5   3 81.6657 6.61281   2
  -3   5   3 89.8129 8.73381   1
  -3   5   2 10.3061 4.19886   2
  -3   5   2 9.77841 5.37875   1
   3  -5  -2 10.4532 8.52357   1
  -3   5   1 182.995 10.9900   1
  -3   5   1 166.787 8.90977   2
   3  -5  -1 186.910 15.4783   1
  -3   5   0-1.97822 3.44630   2
  -3   5   0 1.43312 4.67804   1
   3  -5   0 1.95570 7.13173   1
  -3   5  -1 93.6978 7.91134   1
  -3   5  -1 106.474 7.59244   2
   3  -5   1 116.162 12.0338   1
  -3   5  -2 1575.92 26.5248   2
   3  -5   2 1642.31 38.4151   1
  -3   5  -2 1577.56 26.8706   1
  -3   5  -3 17.9657 4.76022   2
  -3   5  -3 19.9476 4.76849   1
   3  -5   3 20.1834 7.17609   1
  -3   5  -4 4.22937 4.64514   2
  -3   5  -4-4.20456 3.77518   1
   3  -5   4-2.87730 6.33667   1
   3  -5   5 559.700 22.7366   1
  -3   5  -5 519.973 13.4041   1
  -3   5  -5 523.613 16.8763   2
  -3   5  -6 1.08475 3.42058   1
  -3   5  -6 4.92886 3.17999   1
  -3   5  -6 3.09465 4.58933   2
   3  -5   6-2.83487 6.61171   1
   3  -5   7 219.733 15.6672   1
  -3   5  -7 172.569 11.3944   2
  -3   5  -8 2439.84 40.0392   2
   3  -5   8 2351.98 47.7657   1
   3  -5   9 40.8372 10.3318   1
  -3   5  -9 48.3223 8.31583   2
  -3   5 -10 58.8944 8.95649   2
   3  -5  10 74.0194 11.5947   1
   3  -5  11 1701.29 43.7652   1
  -3   5 -11 1641.10 36.5768   2
  -3   5 -12 319.370 17.5836   2
  -3   5 -13 24.3526 8.47704   2
  -3   5 -14 20.7207 8.85037   2
  -3   5 -15 55.3498 11.4029   2
  -3   5 -16 120.212 13.9605   2
  -3   5 -17 1392.36 41.1992   2
  -3   5 -18 30.0348 10.9495   2
  -3   5 -19 50.0171 12.1348   2
  -3   5 -20 5.89110 10.6794   2
  -3   5 -21 104.998 15.4968   2
  -3   5 -22 12.5036 10.8146   2
   3  -4 -27 21.4028 20.3840   2
   3  -4 -26 390.620 34.9453   2
   3  -4 -25 30.1524 18.0889   2
   3  -4 -24-6.08028 15.3312   2
   3  -4 -23 274.786 28.2633   2
  -3   4  23 220.862 24.7299   1
  -3   4  22 81.9184 18.2883   1
   3  -4 -22 89.6288 19.4034   2
   3  -4 -21 23.0498 13.7405   2
  -3   4  21 2.93294 13.2503   1
  -3   4  20 37.2780 13.5071   1
   3  -4 -20 22.7075 13.4813   2
  -3   4  19 213.274 20.9578   1
   3  -4 -19 260.059 25.1557   2
  -3   4  18 176.585 18.8326   1
   3  -4 -18 182.434 13.8524   1
   3  -4 -18 205.490 22.0736   2
  -3   4  17 216.860 19.1368   1
   3  -4 -17 168.655 14.7892   1
   3  -4 -17 178.339 15.2245   3
   3  -4 -17 186.160 20.0019   2
   3  -4 -16 18.0736 9.11865   1
   3  -4 -16 8.65256 7.63045   3
  -3   4  16 28.6795 11.0292   1
   3  -4 -16 28.1321 12.2882   2
  -3   4  15 18.4828 9.55715   1
   3  -4 -15-2.52821 7.20225   3
   3  -4 -15 11.6352 9.34242   1
   3  -4 -15-1.64825 10.2383   2
   3  -4 -14 3968.79 72.0057   2
  -3   4  14 3861.24 65.2646   1
   3  -4 -14 4153.40 56.9667   3
   3  -4 -14 4039.47 67.7857   1
   3  -4 -13 42.7686 8.61464   3
   3  -4 -13 37.0542 11.3678   1
   3  -4 -13 20.8422 9.11093   2
  -3   4  13 42.8091 9.79667   1
  -3   4  12 29.3407 8.01333   1
   3  -4 -12 33.4446 7.53501   3
   3  -4 -12 5.52977 7.42792   2
   3  -4 -12 10.9891 9.34208   1
  -3   4  11 8.47178 4.45912   2
   3  -4 -11 7.29214 9.10550   1
  -3   4  11 9.63655 7.12145   1
  -3   4  10 54.1545 6.65829   2
  -3   4  10 47.0502 8.64940   1
   3  -4 -10 48.5559 11.6952   1
  -3   4   9 104.920 8.06178   2
   3  -4  -9 122.263 15.1430   1
  -3   4   9 109.522 10.8170   1
  -3   4   8 1863.81 29.0340   2
   3  -4  -8 1983.04 48.8675   1
  -3   4   8 1996.33 37.7358   1
   3  -4  -7 73.7942 13.0065   1
  -3   4   7 75.9837 8.73815   1
  -3   4   7 56.9173 5.82786   2
  -3   4   6 40.7290 5.17694   2
  -3   4   6 44.9575 7.24312   1
   3  -4  -6 49.2450 11.1118   1
  -3   4   5 3396.21 44.2122   1
   3  -4  -5 3457.72 60.3970   1
  -3   4   5 3390.26 35.8620   2
  -3   4   4 21.0040 5.91862   1
  -3   4   4 30.1953 4.47172   2
   3  -4  -4 28.5938 9.67920   1
   3  -4  -3 80.1745 11.8461   1
  -3   4   3 69.0178 5.84083   2
  -3   4   3 76.1811 7.56467   1
  -3   4   2 880.513 20.8654   1
   3  -4  -2 830.667 27.9329   1
  -3   4   2 904.579 17.7079   2
  -3   4   1-5.76111 4.80523   1
  -3   4   1 1.38879 3.00337   2
  -3   4   0 20.1348 4.07489   2
  -3   4   0 10.9042 4.36196   1
   3  -4   0 21.5444 7.51074   1
  -3   4  -1 1937.28 25.6013   2
  -3   4  -1 1916.11 27.7016   1
   3  -4   1 1856.13 37.4863   1
  -3   4  -2 66.1517 5.95340   1
  -3   4  -2 64.7357 5.89492   2
   3  -4   2 83.3320 9.22683   1
   3  -4   3 139.447 11.3007   1
  -3   4  -3 131.454 7.57280   2
  -3   4  -3 131.266 7.09005   1
  -3   4  -4 870.564 18.7099   2
   3  -4   4 834.548 24.1469   1
  -3   4  -4 827.320 15.1768   1
  -3   4  -5 4.23862 2.57065   1
  -3   4  -5 5.70477 3.94179   2
   3  -4   5 3.84828 5.84058   1
   3  -4   6 108.546 10.1352   1
  -3   4  -6 98.7341 7.91324   2
   3  -4   7 3549.44 50.5355   1
  -3   4  -7 3483.94 42.5415   2
   3  -4   8 220.293 13.8779   1
  -3   4  -8 197.802 11.1333   2
  -3   4  -9 96.3837 8.84862   2
   3  -4   9 83.0178 9.59149   1
  -3   4  -9 97.3506 7.10298   2
  -3   4 -10 10.4967 6.22376   2
   3  -4  10 3.41928 6.23584   1
  -3   4 -10 4.59550 3.92464   2
  -3   4 -11 33.8550 7.37483   2
   3  -4  11 43.1308 9.07452   1
  -3   4 -11 38.2399 5.99596   2
  -3   4 -12 190.100 13.4668   2
  -3   4 -13 2540.17 45.9570   2
  -3   4 -14 64.1971 10.3641   2
  -3   4 -15 7.33558 8.23135   2
  -3   4 -16 422.069 22.2032   2
  -3   4 -17 314.023 20.9391   2
  -3   4 -18 10.3800 9.07027   2
  -3   4 -19 16.5706 10.0652   2
  -3   4 -20 6.49915 9.85583   2
  -3   4 -21 40.8901 13.5493   2
  -3   4 -22 455.363 27.3804   2
  -3   4 -23-14.0978 11.8172   2
   3  -3 -27 14.2653 18.4028   2
   3  -3 -26 124.644 21.7105   2
   3  -3 -25 158.088 25.7610   2
   3  -3 -24 123.294 21.4791   2
   3  -3 -23 94.2909 19.8749   2
   3  -3 -22 67.1308 18.1729   2
  -3   3  22 82.3939 18.2325   1
  -3   3  21 34.6919 14.5626   1
   3  -3 -21 53.6478 15.9290   2
   3  -3 -20 15.2668 14.2109   2
  -3   3  20 23.1607 13.4471   1
  -3   3  19 13.6475 12.2590   1
   3  -3 -19 30.2533 13.5341   2
   3  -3 -18 1513.69 51.2352   2
   3  -3 -18 1566.52 34.1334   1
  -3   3  18 1495.18 48.2693   1
   3  -3 -17-13.7616 12.5046   2
  -3   3  17-2.44357 10.0870   1
   3  -3 -17-1.69639 7.19697   1
   3  -3 -16-17.5646 12.3799   2
   3  -3 -16 5.96320 7.41351   3
   3  -3 -16 9.17610 7.85092   1
  -3   3  16-0.84599 8.16347   1
  -3   3  15 28.1834 9.15195   1
   3  -3 -15 30.6785 11.6887   2
   3  -3 -15 37.2702 9.18756   1
   3  -3 -15 27.2681 7.98394   3
   3  -3 -14 362.578 21.2031   1
  -3   3  14 441.653 22.9070   1
   3  -3 -14 367.829 17.0768   3
   3  -3 -14 399.605 23.8305   2
   3  -3 -13 248.917 18.8187   2
  -3   3  13 262.341 17.5126   1
   3  -3 -13 233.601 13.4490   3
   3  -3 -13 254.352 17.9247   1
   3  -3 -12 972.077 33.2143   2
   3  -3 -12 1007.17 24.9429   3
  -3   3  12 1058.25 32.1938   1
   3  -3 -12 1006.18 33.5367   1
   3  -3 -11 4.44011 7.33012   2
  -3   3  11-5.59457 7.02080   1
   3  -3 -11 10.7467 8.27783   1
   3  -3 -11 6.76524 5.16466   3
  -3   3  11 1.48098 3.82806   2
   3  -3 -10 6.21263 8.92139   1
   3  -3 -10 1.35417 4.75904   3
  -3   3  10-4.57227 5.75519   1
  -3   3  10-1.58450 3.78106   2
   3  -3 -10-4.89860 7.32098   2
   3  -3  -9 3947.87 65.4771   1
  -3   3   9 4103.29 55.1720   1
  -3   3   8 0.59849 3.44629   2
  -3   3   8 6.53682 5.73834   1
   3  -3  -8-4.30190 8.92387   1
  -3   3   7 94.2023 6.81602   2
  -3   3   7 84.1874 9.03819   1
   3  -3  -7 105.468 13.2906   1
   3  -3  -6 215.714 16.9012   1
  -3   3   6 208.571 12.0684   1
  -3   3   6 169.290 8.61509   2
   3  -3  -5 115.727 12.8928   1
  -3   3   5 97.9810 6.64579   2
  -3   3   5 114.668 9.20323   1
   3  -3  -4 18.7478 8.93432   1
  -3   3   4 16.1929 3.62664   2
  -3   3   4 22.9340 5.31564   1
   3  -3  -3 922.748 28.3289   1
  -3   3   3 931.855 16.9643   2
  -3   3   3 955.467 21.3646   1
  -3   3   2 72.1477 5.38135   2
  -3   3   2 83.9627 7.28815   1
   3  -3  -2 78.2411 10.2900   1
  -3   3   1 10.1815 3.28552   2
   3  -3  -1 13.4084 6.80655   1
  -3   3   1 11.5883 4.61081   1
  -3   3   0 100.750 5.68608   2
  -3   3   0 125.267 7.57784   1
   3  -3   0 100.078 9.95795   1
  -3   3  -1 2.94395 3.58440   1
   3  -3   1-1.00974 5.69326   1
  -3   3  -1 4.33805 2.71366   2
  -3   3  -2 73.0655 5.23594   2
   3  -3   2 72.1422 7.48032   1
  -3   3  -2 78.3380 5.65987   1
  -3   3  -3 4480.01 32.7264   1
  -3   3  -3 4436.46 30.3646   1
   3  -3   3 4628.46 47.4920   1
  -3   3  -3 4561.42 35.7245   2
   3  -3   4 53.6893 6.59585   1
  -3   3  -4 40.4245 4.67582   2
  -3   3  -5 4.50998 3.34038   2
   3  -3   5 3.35838 4.17050   1
  -3   3  -6 175.621 8.82243   2
   3  -3   6 175.614 10.1246   1
   3  -3   7 4.33991 4.74081   1
  -3   3  -7 2.97713 3.64775   2
   3  -3   8 320.854 14.0020   1
  -3   3  -8 315.955 12.4868   2
  -3   3  -9 3592.74 34.1270   2
   3  -3   9 3539.99 45.3696   1
  -3   3  -9 3499.03 41.9446   2
  -3   3 -10 62.5163 7.68023   2
   3  -3  10 37.1446 6.72761   1
  -3   3 -10 51.8360 5.37368   2
   3  -3  11 21.5323 6.87894   1
  -3   3 -11 24.5156 6.61497   2
  -3   3 -11 19.8237 4.68027   2
  -3   3 -12 1930.38 36.4499   2
  -3   3 -12 1955.77 30.8643   2
  -3   3 -13 337.224 16.9342   2
  -3   3 -13 322.483 13.7075   2
  -3   3 -14 18.5478 7.27595   2
  -3   3 -15 48.0964 9.56840   2
  -3   3 -16 50.6448 9.72422   2
  -3   3 -17 43.6359 10.2828   2
  -3   3 -18 1206.43 37.1464   2
  -3   3 -19 13.6041 9.93461   2
  -3   3 -20-1.27787 9.44759   2
  -3   3 -21 6.57031 10.3466   2
  -3   3 -22 97.3143 15.5660   2
  -3   3 -23-5.51329 11.0520   2
  -3   3 -24 248.074 23.1836   2
   3  -2 -27-16.9908 19.5054   2
   3  -2 -26 17.1062 17.3627   2
   3  -2 -25 422.541 35.5287   2
   3  -2 -24-0.17288 17.3759   2
   3  -2 -23 25.0402 14.7836   2
   3  -2 -22 540.102 36.0651   2
  -3   2  22 485.702 33.9002   1
   3  -2 -21 23.1322 13.2815   2
  -3   2  21 27.3559 13.3843   1
  -3   2  20 20.5465 13.0166   1
   3  -2 -20 25.8143 14.0121   2
  -3   2  19-3.81259 10.7012   1
   3  -2 -19 4.20296 11.1987   2
  -3   2  18 151.554 18.0010   1
   3  -2 -18 122.354 18.0838   2
   3  -2 -17 342.779 17.5209   1
  -3   2  17 387.829 25.1266   1
  -3   2  16 401.861 24.5056   1
   3  -2 -16 342.180 24.1768   2
   3  -2 -16 409.074 19.7384   1
  -3   2  15 3.96364 8.29530   1
   3  -2 -15 2.46969 6.34804   3
   3  -2 -15 1.33826 9.43187   2
   3  -2 -15 2.83269 7.00922   1
   3  -2 -14 41.8761 10.8205   2
  -3   2  14 61.5708 11.0978   1
   3  -2 -14 51.0335 7.91320   3
   3  -2 -14 50.3957 10.2049   1
  -3   2  13 4256.93 66.1593   1
   3  -2 -13 4248.21 64.5087   1
   3  -2 -13 4180.33 49.5231   3
   3  -2 -13 4148.81 70.8040   2
   3  -2 -12 29.0179 9.49831   2
  -3   2  12 34.6971 8.52178   1
   3  -2 -12 41.9842 6.78263   3
   3  -2 -12 12.6669 8.34986   1
   3  -2 -11 5.33932 7.70040   1
  -3   2  11 4.14279 4.48405   2
  -3   2  11 3.16203 6.77378   1
   3  -2 -11 3.08155 4.62802   3
   3  -2 -11-11.1825 7.40109   2
   3  -2 -10 82.9262 11.0117   2
  -3   2  10 98.8551 7.95478   2
   3  -2 -10 76.6564 11.1973   1
   3  -2 -10 77.6893 6.93180   3
  -3   2  10 71.7010 9.33068   1
  -3   2   9 142.977 8.82160   2
   3  -2  -9 136.151 13.7325   1
  -3   2   9 162.054 12.0903   1
   3  -2  -9 143.132 8.20238   3
   3  -2  -9 152.955 13.1497   2
  -3   2   8 262.997 10.8808   2
   3  -2  -8 259.748 17.6626   1
   3  -2  -8 230.664 14.5926   2
  -3   2   8 216.163 13.3181   1
  -3   2   7 4498.29 53.1668   1
  -3   2   7 4251.10 40.5358   2
   3  -2  -7 4297.48 63.6244   1
   3  -2  -7 4347.06 56.1144   2
  -3   2   6 68.2589 5.83091   2
   3  -2  -6 73.7635 11.7605   1
   3  -2  -6 65.7543 8.62476   2
  -3   2   6 63.1169 7.88471   1
  -3   2   5 31.5867 4.32138   2
   3  -2  -5 23.6022 9.01696   1
  -3   2   5 24.6219 5.95517   1
   3  -2  -5 39.1741 7.20992   2
  -3   2   4 1246.99 24.7183   1
   3  -2  -4 1222.43 32.2592   1
  -3   2   4 1248.77 19.2939   2
  -3   2   3 21.7821 3.94462   2
   3  -2  -3 21.7751 8.13617   1
  -3   2   3 12.1327 5.06181   1
  -3   2   2 9.11551 2.97081   2
  -3   2   2 11.1470 4.91131   1
   3  -2  -2 14.8794 7.77772   1
  -3   2   1 557.315 11.4124   2
   3  -2  -1 559.889 19.3350   1
  -3   2   1 545.228 14.1670   1
  -3   2   0 4.24523 3.57891   1
   3  -2   0 2.46843 5.45879   1
  -3   2   0-0.68131 2.56706   2
  -3   2  -1 27.1652 4.09619   1
  -3   2  -1 17.3331 2.93134   2
   3  -2   1 15.6177 5.49152   1
  -3   2  -2 43.6011 3.58324   1
  -3   2  -2 46.5705 3.74428   2
   3  -2   2 53.7756 5.99898   1
  -3   2  -3 1.68508 2.32115   2
   3  -2   3 3.91258 3.60479   1
  -3   2  -4-1.23140 2.42350   2
   3  -2   4 0.41841 2.98426   1
  -3   2  -5 274.225 8.61489   2
   3  -2   5 279.925 9.41414   1
  -3   2  -6 2.75399 2.75433   2
   3  -2   6 12.9988 3.40104   1
   3  -2   7 36.2186 4.52538   1
  -3   2  -7 40.5862 4.77630   2
  -3   2  -8 7175.24 51.0755   2
   3  -2   8 7406.42 51.0785   1
   3  -2   9 352.648 12.2824   1
  -3   2  -9 372.431 9.80995   2
  -3   2  -9 322.091 12.3336   2
  -3   2 -10 53.8365 6.55312   2
   3  -2  10 38.0528 5.72964   1
  -3   2 -10 38.9856 4.54240   2
   3  -2  11 26.2143 5.13403   1
  -3   2 -11 32.7714 4.63796   2
  -3   2 -11 35.0671 6.51833   2
  -3   2 -12 63.1429 6.15176   2
  -3   2 -12 76.9191 8.53934   2
  -3   2 -13 132.901 10.6636   2
  -3   2 -13 132.113 8.48205   2
  -3   2 -14 2021.76 38.4333   2
  -3   2 -14 2074.86 31.7395   2
  -3   2 -15 49.1574 8.58432   2
  -3   2 -16 7.24797 8.05397   2
  -3   2 -17 602.586 24.7245   2
  -3   2 -18 321.165 19.8853   2
  -3   2 -19-0.65726 8.72834   2
  -3   2 -20 162.346 16.5987   2
  -3   2 -21 10.4294 10.3318   2
  -3   2 -22 19.2194 12.0670   2
  -3   2 -23 396.108 26.2103   2
  -3   2 -24 8.11983 10.8486   2
   3  -1 -26 63.7553 20.5488   2
   3  -1 -25 170.982 25.6258   2
   3  -1 -24 166.628 24.3018   2
   3  -1 -23 27.2982 15.3526   2
   3  -1 -22 45.1483 17.0138   2
  -3   1  22 61.1882 17.0741   1
  -3   1  21 158.149 21.1470   1
   3  -1 -21 154.386 21.6359   2
   3  -1 -20 37.0575 14.3893   2
  -3   1  20 50.5594 15.5118   1
  -3   1  19 5.53546 11.8115   1
   3  -1 -19 1.86723 12.4297   2
  -3   1  18 103.864 16.0629   1
   3  -1 -18 144.239 19.4091   2
   3  -1 -17 2453.83 62.5652   2
  -3   1  17 2447.54 60.3690   1
   3  -1 -17 2409.18 41.6346   1
   3  -1 -16 14.5743 7.64458   1
  -3   1  16-3.00608 9.04702   1
   3  -1 -16 3.91833 9.35735   2
   3  -1 -15 7.88385 10.2807   2
  -3   1  15-7.61858 9.15696   1
   3  -1 -15-5.52123 6.58672   3
   3  -1 -15-5.38468 7.46945   1
  -3   1  14 134.943 15.1774   1
   3  -1 -14 107.369 15.2760   2
   3  -1 -14 93.7934 11.2036   1
   3  -1 -14 128.901 10.2851   3
   3  -1 -13 367.604 22.2795   2
  -3   1  13 296.820 19.3795   1
   3  -1 -13 344.818 19.0250   1
   3  -1 -13 312.453 13.8405   3
   3  -1 -12 345.608 19.2404   1
   3  -1 -12 322.604 13.1294   3
  -3   1  12 361.723 20.3420   1
   3  -1 -12 365.669 21.2608   2
  -3   1  11 887.975 28.9532   1
  -3   1  11 900.020 21.3783   2
   3  -1 -11 831.709 28.5469   1
   3  -1 -11 790.606 18.5498   3
   3  -1 -11 825.785 29.6977   2
  -3   1  10-4.12961 6.70973   1
   3  -1 -10-2.91072 6.99334   2
   3  -1 -10-2.17480 4.08509   3
   3  -1 -10 1.99071 7.18268   1
  -3   1  10 1.19124 3.72717   2
  -3   1   9 11.2413 4.44493   2
   3  -1  -9 7.30180 7.34749   1
  -3   1   9 18.2127 6.61629   1
   3  -1  -9 11.4970 7.25970   2
   3  -1  -9 15.2773 3.75434   3
  -3   1   8 6845.38 69.4936   1
   3  -1  -8 6743.93 76.4889   1
  -3   1   8 6889.47 53.5651   2
   3  -1  -8 7030.75 75.7017   2
   3  -1  -8 6962.19 41.8755   3
  -3   1   7 272.271 10.8445   2
  -3   1   7 251.285 13.8062   1
   3  -1  -7 286.299 17.1256   1
   3  -1  -7 263.797 7.75716   3
   3  -1  -7 300.411 15.7350   2
   3  -1  -6 2.21224 5.56485   2
  -3   1   6 0.05263 3.22088   2
  -3   1   6 14.2576 6.18495   1
   3  -1  -6 10.1541 8.41197   1
  -3   1   5 341.326 14.3291   1
   3  -1  -5 349.190 18.2494   1
  -3   1   5 347.485 11.1602   2
   3  -1  -5 319.427 14.7546   2
   3  -1  -4 18.5585 6.30018   2
  -3   1   4 14.6348 3.62689   2
  -3   1   4 6.01127 5.26191   1
   3  -1  -4 16.4766 8.10391   1
  -3   1   3 28.7951 6.00484   1
   3  -1  -3 28.6449 5.98162   2
   3  -1  -3 48.4294 9.41233   1
  -3   1   3 28.7975 4.07997   2
  -3   1   2 2223.40 22.3654   2
   3  -1  -2 2096.72 29.6035   2
   3  -1  -2 2132.42 36.0239   1
  -3   1   2 2071.22 28.1633   1
   3  -1  -1 1.57157 4.63210   2
  -3   1   1-0.63827 4.18293   1
  -3   1   1 3.75647 2.66361   2
  -3   1   0 27.4404 4.30567   1
   3  -1   0 35.1071 6.39632   1
   3  -1   0 20.7042 4.78951   2
  -3   1   0 25.0885 3.00439   2
  -3   1  -1 60.4642 3.57648   2
   3  -1   1 50.6811 5.78806   1
  -3   1  -1 63.9080 3.98444   1
  -3   1  -1 65.1460 4.57504   1
  -3   1  -2 15.5236 2.27659   2
   3  -1   2 17.0230 3.55327   1
  -3   1  -3 1.45514 1.76053   2
   3  -1   3-0.37774 2.10426   1
  -3   1  -3-3.53336 7.26526   3
  -3   1  -4 4618.50 24.0427   2
  -3   1  -4 4651.94 55.9992   3
  -3   1  -5 5.32528 7.19473   3
  -3   1  -5-2.03343 2.05671   2
  -3   1  -6 49.5298 9.33866   3
  -3   1  -6 56.5479 3.81498   2
   3  -1   7 5.60204 1.73862   1
  -3   1  -7 5.03973 2.69838   2
  -3   1  -7 1.79172 7.74330   3
  -3   1  -8 67.9210 11.4088   3
   3  -1   8 68.8695 3.94298   1
  -3   1  -8 57.9664 4.67562   2
   3  -1   9 50.4322 4.18329   1
  -3   1  -9 30.3522 10.1367   3
  -3   1  -9 65.2054 3.78199   2
  -3   1  -9 70.9181 5.53028   2
  -3   1 -10 2833.39 32.4867   2
   3  -1  10 2752.04 28.9203   1
  -3   1 -10 2723.60 25.3149   2
  -3   1 -10 2736.59 56.7437   3
   3  -1  11 54.9478 5.83910   1
  -3   1 -11 48.4691 4.46646   2
  -3   1 -11 57.5978 12.9115   3
  -3   1 -11 66.3645 6.75673   2
  -3   1 -12 38.0566 4.55286   2
  -3   1 -12 37.6807 6.08573   2
  -3   1 -12 48.4931 13.0267   3
  -3   1 -13 2636.10 39.0310   2
  -3   1 -13 2584.67 30.8680   2
  -3   1 -13 2405.10 60.0175   3
  -3   1 -14 174.333 9.19834   2
  -3   1 -14 151.229 11.5196   2
  -3   1 -14 170.380 20.4561   3
  -3   1 -15 113.585 7.93991   2
  -3   1 -15 119.086 11.1537   2
  -3   1 -16 62.8182 9.59213   2
  -3   1 -17 13.2830 7.57202   2
  -3   1 -18 87.9222 11.6472   2
  -3   1 -19 855.981 30.5762   2
  -3   1 -20 0.16378 8.23531   2
  -3   1 -21 32.0438 11.3208   2
  -3   1 -22-4.61646 10.7970   2
  -3   1 -23 69.8309 13.5286   2
  -3   1 -24-6.13203 12.2313   2
  -3   1 -25 413.055 27.2797   2
   3   0 -26 25.4371 20.2948   2
   3   0 -25 13.3853 16.7185   2
   3   0 -24 283.091 29.2305   2
   3   0 -23 112.651 20.6432   2
   3   0 -22 77.7415 17.4501   2
  -3   0  21 651.706 37.7102   1
   3   0 -21 580.881 36.5561   2
   3   0 -20-10.4629 14.3427   2
  -3   0  20 4.85176 12.2123   1
   3   0 -19 35.1670 14.6938   2
  -3   0  19 23.0659 11.5462   1
   3   0 -18 99.3240 16.6352   2
  -3   0  18 92.7584 16.3606   1
  -3   0  17 147.065 17.7339   1
   3   0 -17 125.753 10.7852   1
   3   0 -17 103.722 16.4532   2
   3   0 -16 579.847 30.9734   2
  -3   0  16 654.514 32.0116   1
   3   0 -16 603.982 22.4031   1
   3   0 -15 237.827 20.0454   2
  -3   0  15 244.885 20.3575   1
   3   0 -15 231.512 14.9808   1
   3   0 -14 15.2700 9.45158   2
   3   0 -14-3.99425 6.93493   1
  -3   0  14 5.12246 9.21881   1
   3   0 -13 142.780 15.4241   2
   3   0 -13 123.839 12.2064   1
   3   0 -12 4393.11 61.9309   1
   3   0 -12 4362.03 70.2061   2
  -3   0  12 4211.48 66.5528   1
   3   0 -11 31.2038 8.87203   2
   3   0 -11 35.1634 5.34800   3
   3   0 -11 25.2558 8.22222   1
  -3   0  11 42.2844 9.30641   1
   3   0 -10 2.92431 3.92051   3
  -3   0  10 5.25132 6.94650   1
  -3   0  10-0.33861 3.68332   2
   3   0 -10-8.59340 7.70141   1
   3   0 -10 6.68356 7.04119   2
   3   0  -9 104.509 11.4414   2
   3   0  -9 80.7980 10.8403   1
  -3   0   9 78.5902 10.1060   1
  -3   0   9 93.5481 7.49714   2
   3   0  -9 102.586 6.27842   3
   3   0  -8 272.264 16.1752   2
   3   0  -8 310.909 8.48697   3
   3   0  -8 338.574 18.2066   1
  -3   0   8 323.374 12.2604   2
  -3   0   8 316.684 16.2849   1
  -3   0   7 187.675 9.11804   2
   3   0  -7 197.552 13.1825   2
   3   0  -7 185.241 14.1457   1
   3   0  -7 200.486 5.71691   3
  -3   0   7 207.101 12.9095   1
  -3   0   6 2092.63 27.7038   2
  -3   0   6 2094.71 36.2650   1
   3   0  -6 2091.87 37.7553   2
   3   0  -6 2061.60 40.0833   1
   3   0  -5-5.04398 5.97373   2
  -3   0   5 1.00383 5.68133   1
  -3   0   5 0.02492 3.24517   2
   3   0  -5-2.25817 7.49009   1
   3   0  -4 2.18425 5.27372   2
  -3   0   4 6.33266 5.64683   1
  -3   0   4 13.7450 3.88972   2
   3   0  -4 6.46949 6.99242   1
  -3   0   3 1817.83 22.1297   2
   3   0  -3 1786.43 33.8820   1
   3   0  -3 1802.52 29.2337   2
  -3   0   3 1801.48 28.6975   1
  -3   0   2 104.669 5.71181   2
  -3   0   2 104.353 7.92598   1
   3   0  -2 106.180 7.78649   2
   3   0  -2 119.602 10.4390   1
  -3   0   1 7.33307 4.20000   1
  -3   0   1 14.9176 3.09868   2
   3   0  -1 11.0767 6.37502   1
   3   0  -1 11.6594 4.31282   2
  -3   0   1 12.0439 3.83398   3
   3   0   0 4362.49 41.7526   1
   3   0   0 4122.84 33.3831   2
  -3   0   0 4218.33 26.2472   2
  -3   0   0 4374.43 36.1329   3
  -3   0   0 4421.38 31.7836   1
  -3   0  -1 5.39065 1.96835   2
  -3   0  -1 3.68609 3.34021   2
   3   0   1 12.4914 4.52941   1
  -3   0  -1 6.06399 4.57471   3
  -3   0  -1 3.48458 2.19775   1
  -3   0  -2 4.43824 5.40401   3
  -3   0  -2-0.29339 1.50526   2
   3   0   2-1.48503 2.63717   1
  -3   0  -2 2.49386 2.56558   2
  -3   0  -3 448.441 15.8559   3
  -3   0  -4 35.2548 7.75222   3
  -3   0  -5-4.45153 6.45613   3
  -3   0  -6 1414.60 31.9775   3
  -3   0  -7 22.6351 7.90749   3
  -3   0  -8 3.48860 2.22447   2
  -3   0  -8 0.57702 7.07082   3
  -3   0  -9 4626.21 66.8230   3
  -3   0  -9 4653.24 24.4102   2
  -3   0  -9 4566.85 32.2374   2
   3   0  10 78.7152 3.68689   1
  -3   0 -10 73.4760 4.14500   2
  -3   0 -10 79.0147 5.78898   2
  -3   0 -10 103.950 13.4206   3
  -3   0 -11 35.4469 5.26099   2
  -3   0 -11 42.4138 10.6135   3
  -3   0 -11 34.6045 3.55114   2
   3   0  11 37.7264 3.76940   1
   3   0  12 4.44884 3.21328   1
  -3   0 -12-0.50690 4.45854   2
  -3   0 -12 6.96520 3.13090   2
  -3   0 -12 10.6228 10.1820   3
  -3   0 -13 101.399 8.73114   2
  -3   0 -13 111.191 16.3630   3
  -3   0 -13 111.609 6.45010   2
  -3   0 -14 183.114 11.8859   2
  -3   0 -14 154.492 18.6324   3
  -3   0 -14 179.525 8.50712   2
  -3   0 -15 2303.07 39.7342   2
  -3   0 -15 2372.40 30.7260   2
  -3   0 -15 2344.29 61.8675   3
  -3   0 -16 9.82449 6.84492   2
  -3   0 -16 13.4969 4.51653   2
  -3   0 -16 12.8596 12.8245   3
  -3   0 -17 9.94979 7.11770   2
  -3   0 -17 18.2378 14.1780   3
  -3   0 -18 696.750 26.2819   2
  -3   0 -18 724.259 40.0959   3
  -3   0 -19 144.877 14.2121   2
  -3   0 -20 32.0001 9.72373   2
  -3   0 -21 343.281 21.6597   2
  -3   0 -22 6.86309 9.96398   2
  -3   0 -23 8.91633 10.5333   2
  -3   0 -24 121.762 16.2265   2
  -3   0 -25 34.7652 13.9054   2
   3   1 -26 62.4552 19.7641   2
   3   1 -25 68.1715 20.9978   2
   3   1 -24 92.5332 21.3866   2
   3   1 -23 127.355 22.3429   2
   3   1 -22-12.1290 13.9547   2
  -3  -1  21 24.0981 15.2617   1
   3   1 -21 22.3018 15.4338   2
  -3  -1  20 229.613 24.3525   1
   3   1 -20 320.156 27.4937   2
   3   1 -19 21.2587 12.8561   2
  -3  -1  19 15.8786 12.5767   1
   3   1 -18 10.9434 11.3689   2
  -3  -1  18 4.89188 12.2007   1
   3   1 -17 253.584 22.6458   2
   3   1 -17 240.145 13.8935   1
  -3  -1  17 242.900 21.7378   1
  -3  -1  16 3071.45 67.6802   1
   3   1 -16 2934.30 67.1666   2
   3   1 -16 2964.29 47.0212   1
  -3  -1  15 27.6764 11.8603   1
   3   1 -15 25.3952 11.8885   2
   3   1 -15 27.3122 8.31460   1
   3   1 -14-4.33954 7.56783   1
  -3  -1  14 6.48939 8.85067   1
   3   1 -14-0.49472 9.11574   2
   3   1 -13 280.787 16.9845   1
   3   1 -13 216.408 18.4802   2
  -3  -1  13 278.435 19.6136   1
  -3  -1  12 245.993 18.2107   1
   3   1 -12 236.576 15.8310   1
   3   1 -12 240.818 18.2002   2
  -3  -1  11 576.757 25.3643   1
   3   1 -11 632.812 24.2581   1
   3   1 -11 606.329 26.5677   2
  -3  -1  10 823.944 28.7649   1
  -3  -1  10 842.555 21.3141   2
   3   1 -10 904.142 28.3659   1
   3   1 -10 868.178 29.8303   2
  -3  -1   9 13.1673 6.79290   1
  -3  -1   9 17.1351 4.51809   2
   3   1  -9 34.8820 8.87463   1
   3   1  -9 36.3427 9.05386   2
  -3  -1   8 1.76960 3.81047   2
   3   1  -8-0.43483 6.38350   2
  -3  -1   8 2.04695 6.58317   1
   3   1  -8 18.7310 8.19711   1
  -3  -1   7 6000.46 51.1598   2
   3   1  -7 6002.21 67.3769   2
  -3  -1   7 6069.62 67.0235   1
   3   1  -7 5873.51 68.6882   1
  -3  -1   6 229.154 13.5205   1
   3   1  -6 243.203 14.0757   2
  -3  -1   6 232.852 10.1640   2
   3   1  -6 253.881 15.4695   1
   3   1  -5 138.544 12.0782   1
  -3  -1   5 163.122 11.4614   1
  -3  -1   5 143.106 7.93984   2
   3   1  -5 154.132 11.0325   2
  -3  -1   4 292.920 13.5645   1
  -3  -1   4 309.756 10.6322   2
   3   1  -4 305.235 15.7260   1
   3   1  -4 336.319 14.5055   2
  -3  -1   3 104.184 6.28979   2
  -3  -1   3 123.443 9.29782   1
   3   1  -3 130.093 10.8596   1
   3   1  -3 115.175 8.70183   2
   3   1  -2 2.43618 6.57978   1
  -3  -1   2 0.56427 2.94114   2
   3   1  -2-8.98907 4.97318   2
  -3  -1   2 2.71475 2.30228   3
  -3  -1   2 8.28176 5.11202   1
   3   1  -1 23.6320 4.85473   2
  -3  -1   1 28.3936 5.18376   1
  -3  -1   1 28.0817 3.58585   2
  -3  -1   1 34.9050 3.73879   3
   3   1  -1 30.1041 7.13336   1
  -3  -1   1 27.8693 5.31210   2
   3   1   0 3.01200 3.32060   2
  -3  -1   0 11.0598 4.34935   1
   3   1   0-3.28686 5.61456   1
  -3  -1   0 8.33526 3.84446   3
  -3  -1   0 7.50543 2.69179   2
  -3  -1  -1 62.5955 3.75904   2
  -3  -1  -1 66.8414 6.20536   3
   3   1   1 61.5287 6.46693   1
  -3  -1  -1 67.9183 4.72314   1
  -3  -1  -1 68.8564 5.72554   1
  -3  -1  -1 60.3248 4.96658   2
   3   1   2 254.329 8.57838   1
  -3  -1  -2 243.093 6.86902   2
  -3  -1  -2 257.937 10.9733   3
  -3  -1  -2 240.462 5.66450   2
  -3  -1  -3 14.9583 2.10138   2
  -3  -1  -3 16.7818 6.05776   3
  -3  -1  -3 11.2695 1.68735   2
  -3  -1  -4 29.5385 6.99928   3
  -3  -1  -5 2596.21 39.2958   3
  -3  -1  -6 2.54043 6.24193   3
  -3  -1  -7-5.27092 6.43952   3
  -3  -1  -8 2.28652 7.16737   3
  -3  -1  -9 71.9949 2.88585   2
  -3  -1  -9 73.9311 11.1859   3
  -3  -1 -10 19.9651 2.28082   2
  -3  -1 -10 10.2360 8.04442   3
  -3  -1 -11 1283.54 37.8422   3
  -3  -1 -11 1338.46 15.4427   2
   3   1  11 1374.27 14.0523   1
  -3  -1 -11 1336.47 20.7258   2
  -3  -1 -12 13.3899 4.82712   2
  -3  -1 -12 12.8706 2.76528   2
  -3  -1 -12-2.84152 8.89050   3
   3   1  12 11.4765 2.62372   1
  -3  -1 -13 10.4441 5.00218   2
  -3  -1 -13 8.35011 3.14535   2
  -3  -1 -14 3240.00 31.7798   2
  -3  -1 -14 3135.87 42.6226   2
  -3  -1 -14 3081.74 65.3926   3
  -3  -1 -15 146.365 8.16290   2
  -3  -1 -15 128.925 10.6822   2
  -3  -1 -15 117.058 16.8862   3
  -3  -1 -16 77.6581 9.82971   2
  -3  -1 -16 67.0124 6.53841   2
  -3  -1 -16 71.4352 15.7907   3
  -3  -1 -17 170.277 13.4465   2
  -3  -1 -17 150.976 20.3609   3
  -3  -1 -17 131.778 8.73060   2
  -3  -1 -18 43.3458 9.79871   2
  -3  -1 -18 35.6846 14.7612   3
  -3  -1 -19 41.5700 10.4495   2
  -3  -1 -19 38.9728 17.3628   3
  -3  -1 -20 562.247 25.9035   2
  -3  -1 -20 526.554 36.3094   3
  -3  -1 -21 29.6334 17.2252   3
  -3  -1 -21 45.0971 11.4502   2
  -3  -1 -22 38.0373 11.7652   2
  -3  -1 -23 3.23175 10.9770   2
  -3  -1 -24 15.7036 11.5522   2
  -3  -1 -25 28.4395 12.6232   2
  -3  -1 -26 566.750 31.5127   2
   3   2 -25 17.1503 17.2782   2
   3   2 -24-2.13436 16.7071   2
   3   2 -23 189.639 25.5571   2
   3   2 -22-3.77159 15.4119   2
   3   2 -21 190.217 23.7609   2
  -3  -2  21 181.174 24.1778   1
  -3  -2  20 790.540 42.0971   1
   3   2 -20 817.351 41.2898   2
   3   2 -19 12.5886 12.4323   2
  -3  -2  19 8.10591 14.0462   1
  -3  -2  18 15.6156 12.0529   1
   3   2 -18-5.17573 11.9861   2
  -3  -2  17 131.060 17.6299   1
   3   2 -17 178.442 19.7752   2
   3   2 -16 210.448 20.7698   2
   3   2 -16 241.754 14.6788   1
   3   2 -15 496.789 20.9623   1
  -3  -2  15 476.989 28.1614   1
   3   2 -15 437.924 27.0836   2
   3   2 -14 244.070 20.3787   2
   3   2 -14 281.730 16.9028   1
  -3  -2  14 244.872 20.8484   1
   3   2 -13-2.07923 8.18069   1
  -3  -2  13-2.66986 8.74977   1
   3   2 -13-2.39484 9.15709   2
   3   2 -12 242.031 15.8184   1
  -3  -2  12 215.695 17.5831   1
   3   2 -12 277.553 19.8374   2
   3   2 -11 6484.31 75.6879   1
   3   2 -11 6306.09 83.1560   2
   3   2 -10 278.110 18.4102   2
  -3  -2  10 299.479 18.9386   1
  -3  -2  10 299.632 13.6840   2
   3   2 -10 329.101 18.1937   1
   3   2  -9 41.1043 9.35071   2
  -3  -2   9 27.1604 8.83873   1
  -3  -2   9 34.1553 5.63358   2
   3   2  -9 29.0089 8.38888   1
  -3  -2   8-3.36938 6.81478   1
   3   2  -8 15.6676 7.47597   1
   3   2  -8 4.60228 6.44313   2
  -3  -2   8 7.05640 3.76150   2
  -3  -2   7 181.946 13.4307   1
  -3  -2   7 185.593 9.90862   2
   3   2  -7 188.856 13.6419   1
   3   2  -7 164.154 12.7496   2
   3   2  -6 317.587 16.7762   1
  -3  -2   6 258.447 11.2174   2
   3   2  -6 249.484 14.5763   2
  -3  -2   6 286.118 15.5477   1
   3   2  -5 338.732 15.6119   2
   3   2  -5 302.628 16.2150   1
  -3  -2   5 310.382 11.7450   2
  -3  -2   5 280.164 14.8222   1
  -3  -2   4 0.76241 3.57987   2
   3   2  -4-1.65590 6.33048   1
  -3  -2   4 14.3464 6.41610   1
   3   2  -4 0.81314 5.35969   2
   3   2  -3 11.5970 5.59138   2
  -3  -2   3 4.29881 5.49136   1
  -3  -2   3 16.5753 4.25794   2
   3   2  -3 12.1818 6.82719   1
   3   2  -2 1711.32 32.1118   1
  -3  -2   2 1713.81 29.4561   1
  -3  -2   2 1728.70 23.3060   2
   3   2  -2 1769.63 28.4423   2
   3   2  -1 90.3884 7.02599   2
  -3  -2   1 75.6648 5.62083   2
  -3  -2   1 94.8793 8.33163   1
   3   2  -1 78.7382 8.83914   1
   3   2   0 28.8307 7.24256   1
   3   2   0 47.7208 5.49146   2
  -3  -2   0 29.1183 6.00767   1
  -3  -2   0 28.0931 3.85179   2
  -3  -2   0 35.5813 4.85160   3
   3   2   1 3443.03 29.1096   2
  -3  -2  -1 3536.15 33.6495   1
  -3  -2  -1 3559.24 34.0764   3
   3   2   1 3480.75 38.8176   1
  -3  -2  -2-2.73881 3.17034   2
  -3  -2  -2 2.24739 2.53351   2
   3   2   2-1.25325 4.13451   1
  -3  -2  -2 3.11983 3.96665   1
  -3  -2  -2 0.95904 3.37866   1
  -3  -2  -2-1.39576 4.45829   3
  -3  -2  -3 27.4228 3.17018   2
  -3  -2  -3 35.7325 6.43647   3
   3   2   3 25.8362 4.24267   1
  -3  -2  -3 14.8144 2.56601   2
  -3  -2  -4 158.510 10.4658   3
  -3  -2  -4 159.905 4.87629   2
   3   2   4 165.124 6.12152   1
  -3  -2  -4 139.845 4.63122   2
  -3  -2  -5 4.61592 1.57506   2
  -3  -2  -5 8.71263 1.73846   2
  -3  -2  -5 4.08117 5.81574   3
  -3  -2  -6 27.8436 1.88224   2
  -3  -2  -6 27.8388 2.00814   2
  -3  -2  -6 34.8027 7.77846   3
  -3  -2  -7 1468.83 33.2977   3
  -3  -2  -7 1426.92 10.4047   2
  -3  -2  -7 1485.54 10.5600   2
  -3  -2  -8 19.7696 7.93381   3
  -3  -2  -8 12.1772 1.70123   2
  -3  -2  -9 0.42666 1.53396   2
  -3  -2  -9 2.21746 7.07929   3
  -3  -2 -10 4049.87 24.5980   2
   3   2  10 4030.27 20.2285   1
  -3  -2 -10 4256.74 63.9273   3
  -3  -2 -11 8.43655 2.41175   2
   3   2  11 11.1631 2.33319   1
  -3  -2 -11 14.9561 9.16377   3
  -3  -2 -12 123.286 5.69627   2
   3   2  12 113.612 5.41231   1
  -3  -2 -12 121.351 14.1858   3
  -3  -2 -13 10.5575 3.10157   2
  -3  -2 -13 11.6401 9.76570   3
  -3  -2 -14 135.110 7.08367   2
  -3  -2 -14 113.789 15.4213   3
  -3  -2 -14 131.103 9.86868   2
  -3  -2 -15 39.6840 7.13181   2
  -3  -2 -15 34.3302 12.6432   3
  -3  -2 -15 44.2134 5.14771   2
  -3  -2 -16 891.935 18.9188   2
  -3  -2 -16 900.111 26.1909   2
  -3  -2 -16 927.545 39.1720   3
  -3  -2 -17 14.1336 11.5138   3
  -3  -2 -17-1.05196 3.92873   2
  -3  -2 -17 6.64617 6.85523   2
  -3  -2 -18-6.32869 7.51118   2
  -3  -2 -18 24.8670 13.1523   3
  -3  -2 -19 439.431 31.7027   3
  -3  -2 -19 403.715 21.2170   2
  -3  -2 -20 61.6040 19.3807   3
  -3  -2 -20 37.3910 10.4615   2
  -3  -2 -21 58.5167 12.7814   2
  -3  -2 -21 15.9715 15.5660   3
  -3  -2 -22 721.494 31.0245   2
  -3  -2 -22 668.527 42.7853   3
  -3  -2 -23 21.4563 10.6771   2
  -3  -2 -23 16.3255 18.2271   3
  -3  -2 -24-7.15711 11.4077   2
  -3  -2 -24-20.3542 20.3648   3
  -3  -2 -25 90.7410 15.8981   2
  -3  -2 -26 84.0677 15.2426   2
   3   3 -24 28.4889 16.8342   2
   3   3 -23 162.329 24.6150   2
   3   3 -22 29.6088 16.4203   2
  -3  -3  21 62.2099 19.5677   1
   3   3 -21 87.9828 18.7697   2
   3   3 -20 32.5956 14.8189   2
  -3  -3  20 50.9936 17.4933   1
   3   3 -19 164.175 21.6627   2
  -3  -3  19 231.691 25.4947   1
   3   3 -18-4.10621 11.9572   2
  -3  -3  18 0.72630 13.5812   1
   3   3 -17 31.3740 13.7096   2
  -3  -3  17 66.2425 16.9584   1
  -3  -3  16 298.882 25.3330   1
   3   3 -16 265.681 14.9784   1
   3   3 -16 314.319 16.5187   1
   3   3 -16 269.356 22.9257   2
  -3  -3  15 1905.16 56.0857   1
   3   3 -15 1947.60 54.9116   2
   3   3 -15 2007.64 40.7334   1
   3   3 -14 153.791 13.1614   1
   3   3 -14 156.281 17.7645   2
  -3  -3  14 144.516 17.9828   1
  -3  -3  13 22.7045 11.3322   1
   3   3 -13 3.73772 9.06195   2
   3   3 -13 5.34184 7.04047   1
   3   3 -12 283.370 17.3640   1
   3   3 -12 283.306 20.2825   2
  -3  -3  12 253.460 20.1859   1
  -3  -3  11 356.051 22.1865   1
   3   3 -11 349.713 18.9974   1
   3   3 -11 356.255 21.7380   2
   3   3 -10 588.013 23.8616   1
   3   3 -10 548.755 25.3445   2
  -3  -3  10 591.966 26.8239   1
  -3  -3   9 366.426 20.8030   1
   3   3  -9 354.963 19.8099   2
  -3  -3   9 374.981 15.1130   2
   3   3  -9 347.602 19.0511   1
  -3  -3   8-3.83377 4.55504   2
  -3  -3   8-10.4137 7.87315   1
   3   3  -8-3.34009 7.41574   2
   3   3  -8-3.88235 7.77311   1
   3   3  -7 6.66391 6.85972   1
   3   3  -7-3.02652 6.45756   2
  -3  -3   7 7.65034 4.76905   2
  -3  -3   7 1.97066 6.99980   1
  -3  -3   6 4801.71 63.9667   1
   3   3  -6 4986.89 63.2089   1
   3   3  -6 4764.91 61.1563   2
  -3  -3   5 485.305 20.3315   1
  -3  -3   5 518.450 15.7897   2
   3   3  -5 495.983 19.4467   2
   3   3  -5 487.606 20.1418   1
   3   3  -4 217.751 12.7614   2
  -3  -3   4 218.829 10.3642   2
   3   3  -4 212.851 13.6087   1
  -3  -3   4 222.772 14.2371   1
  -3  -3   3 972.390 26.2259   1
   3   3  -3 1017.95 26.9979   1
  -3  -3   3 998.881 20.5198   2
   3   3  -3 1000.30 24.3113   2
   3   3  -2 161.492 11.7998   1
   3   3  -2 174.676 10.5760   2
  -3  -3   2 147.802 11.1811   1
  -3  -3   2 178.084 8.81699   2
   3   3  -1 4.77340 4.01657   2
   3   3  -1-0.13121 5.64088   1
  -3  -3   1-2.95628 5.62990   1
  -3  -3   1 5.20510 3.72263   2
  -3  -3   0 197.925 8.57792   2
   3   3   0 199.028 11.6539   1
   3   3   0 191.981 9.11788   2
  -3  -3   0 171.794 10.7324   1
   3   3   1 62.5156 5.34343   2
  -3  -3  -1 44.2728 6.87455   1
   3   3   1 64.4266 7.41044   1
  -3  -3  -1 49.7750 4.81835   2
  -3  -3  -2 138.815 8.82007   3
   3   3   2 145.591 8.94250   1
  -3  -3  -2 143.904 6.76965   2
  -3  -3  -2 137.549 8.75178   1
  -3  -3  -3 25.3634 5.99499   3
   3   3   3 29.3714 5.35304   1
  -3  -3  -3 33.3117 3.78449   2
  -3  -3  -3 40.4497 5.35689   1
  -3  -3  -3 33.9589 4.17553   2
  -3  -3  -4 241.884 7.60998   2
  -3  -3  -4 249.075 7.97952   2
   3   3   4 264.401 10.1801   1
  -3  -3  -4 265.038 13.0929   3
  -3  -3  -5 249.262 7.32464   2
  -3  -3  -5 283.152 7.40981   2
  -3  -3  -5 255.772 13.5208   3
   3   3   5 256.064 9.26538   1
  -3  -3  -6 11631.5 87.4029   3
  -3  -3  -6 11760.8 43.7785   2
   3   3   6 11526.5 53.4649   1
  -3  -3  -7 18.3320 2.53546   2
  -3  -3  -7 10.7420 7.41158   3
   3   3   7 17.6185 3.12744   1
  -3  -3  -8 20.0176 2.57988   2
   3   3   8 20.4268 2.97060   1
  -3  -3  -8 12.8702 7.24838   3
  -3  -3  -9 5.18926 2.26473   2
   3   3   9 5.48194 2.46213   1
  -3  -3  -9 14.8294 7.59975   3
   3   3  10 53.4352 3.88868   1
  -3  -3 -10 64.2633 4.10822   2
  -3  -3 -10 45.2832 9.89199   3
  -3  -3 -11 29.6831 9.83842   3
   3   3  11 16.6288 3.02116   1
  -3  -3 -11 18.4255 3.07674   2
   3   3  12 946.446 16.1587   1
  -3  -3 -12 985.848 34.4389   3
  -3  -3 -12 949.215 15.4404   2
  -3  -3 -13 0.59180 2.86452   2
  -3  -3 -13 11.4875 10.2435   3
  -3  -3 -14 0.78892 3.15736   2
  -3  -3 -14-0.78441 10.3838   3
  -3  -3 -15 1537.71 23.5450   2
  -3  -3 -15 1449.68 46.5316   3
  -3  -3 -16 5.97851 3.66391   2
  -3  -3 -16 1.93522 6.08973   2
  -3  -3 -16 7.67044 11.2778   3
  -3  -3 -17 78.5924 10.6167   2
  -3  -3 -17 73.6473 6.77679   2
  -3  -3 -17 93.3858 16.2554   3
  -3  -3 -18 204.507 15.5455   2
  -3  -3 -18 197.407 22.3911   3
  -3  -3 -19 7.31997 8.20557   2
  -3  -3 -19 33.9970 14.5136   3
  -3  -3 -20 20.4625 14.0270   3
  -3  -3 -20 32.9777 10.3904   2
  -3  -3 -21 235.436 19.0733   2
  -3  -3 -21 212.652 24.8229   3
  -3  -3 -22 65.9784 13.3727   2
  -3  -3 -22 83.8366 20.9620   3
  -3  -3 -23 68.6503 22.0691   3
  -3  -3 -23 41.2447 13.1493   2
  -3  -3 -24 53.5958 21.0157   3
  -3  -3 -24 7.41153 11.5781   2
  -3  -3 -25-6.20148 18.8652   3
  -3  -3 -25 7.85091 12.4340   2
  -3  -3 -26-9.56064 12.2207   2
   3   4 -23 6.72792 16.4725   2
   3   4 -22 92.3439 21.0209   2
   3   4 -21 30.1566 16.5250   2
  -3  -4  21 21.1687 17.6813   1
  -3  -4  20 321.023 30.8306   1
   3   4 -20 242.567 26.7744   2
  -3  -4  19 706.508 42.1959   1
   3   4 -19 850.873 43.0476   2
   3   4 -18-9.30534 13.5537   2
  -3  -4  18 14.9381 15.5778   1
  -3  -4  17 27.0727 15.8074   1
   3   4 -17-15.1253 12.8091   2
   3   4 -16 319.914 25.5436   2
  -3  -4  16 312.005 26.5568   1
   3   4 -16 324.633 16.6169   1
   3   4 -15 192.279 20.0996   2
   3   4 -15 197.924 14.6651   1
   3   4 -15 157.236 13.1810   1
  -3  -4  14 225.842 22.1963   1
   3   4 -14 207.186 14.6804   1
   3   4 -14 243.674 16.2511   1
   3   4 -14 257.689 21.9080   2
  -3  -4  13 2.41169 11.0191   1
   3   4 -13 16.5010 10.4693   2
   3   4 -13 17.1569 7.84601   1
   3   4 -12 19.3546 9.52282   2
  -3  -4  12 3.23114 9.55416   1
   3   4 -12 8.60466 7.32964   1
   3   4 -11 335.846 21.5610   2
  -3  -4  11 335.934 23.0911   1
   3   4 -11 341.268 19.3658   1
   3   4 -10 5228.30 77.2350   2
   3   4 -10 5125.00 69.9494   1
  -3  -4  10 5198.46 80.7810   1
   3   4  -9 457.696 21.8803   1
  -3  -4   9 451.713 24.6230   1
   3   4  -9 446.693 22.8321   2
   3   4  -8 51.0884 10.2840   1
   3   4  -8 31.5754 9.16135   2
  -3  -4   8 44.5820 10.4924   1
  -3  -4   8 65.9397 7.62189   2
  -3  -4   7-7.12824 8.51943   1
   3   4  -7 1.76666 6.25842   2
   3   4  -7 4.08815 7.65632   1
  -3  -4   7-1.06197 4.17449   2
   3   4  -6 148.902 12.8644   2
  -3  -4   6 150.421 9.87976   2
  -3  -4   6 148.276 14.0661   1
   3   4  -6 163.503 13.5162   1
  -3  -4   5 170.591 10.1195   2
   3   4  -5 167.006 12.8041   2
  -3  -4   5 169.954 14.4465   1
   3   4  -5 193.507 14.2516   1
  -3  -4   4 329.884 18.1762   1
   3   4  -4 327.268 16.0615   2
  -3  -4   4 370.968 13.8834   2
   3   4  -4 309.231 16.9540   1
  -3  -4   3 4.27259 7.25436   1
  -3  -4   3 1.64923 3.81185   2
   3   4  -3 10.2263 5.66171   2
   3   4  -3 22.1183 7.66117   1
  -3  -4   2 91.3764 7.19472   2
  -3  -4   2 68.6150 9.34905   1
   3   4  -2 95.1309 8.71634   2
   3   4  -2 101.974 10.6307   1
   3   4  -1 2056.90 32.4829   2
  -3  -4   1 1983.17 37.8799   1
   3   4  -1 1989.22 37.3707   1
   3   4   0 485.195 15.0465   2
  -3  -4   0 541.923 14.7339   2
  -3  -4   0 486.740 18.7312   1
   3   4   0 500.841 18.8117   1
   3   4   1 354.756 12.1182   2
  -3  -4  -1 337.225 11.1482   2
  -3  -4  -1 348.224 15.6889   1
   3   4   1 322.253 14.7627   1
   3   4   2 7012.50 61.9054   1
   3   4   2 7220.39 48.3579   2
  -3  -4  -2 7010.37 63.2965   1
  -3  -4  -3 53.2280 4.64426   2
   3   4   3 73.5843 7.46139   1
  -3  -4  -3 67.3511 8.04005   1
  -3  -4  -4 4.68966 3.46384   2
  -3  -4  -4 9.21607 5.14967   1
  -3  -4  -4 3.26981 2.92355   2
   3   4   4-1.28210 4.44911   1
  -3  -4  -5 902.130 24.5534   3
  -3  -4  -5 909.202 16.7474   2
   3   4   5 940.604 20.5162   1
  -3  -4  -5 955.077 16.7178   1
  -3  -4  -5 932.873 17.6731   1
  -3  -4  -6 27.9807 3.69926   2
  -3  -4  -6 21.6793 7.02667   3
   3   4   6 28.1494 4.68056   1
  -3  -4  -7 11.0633 3.14055   2
   3   4   7 10.6026 3.96588   1
  -3  -4  -7 1.86179 6.23783   3
  -3  -4  -8 772.257 26.0862   3
  -3  -4  -8 776.615 13.9672   2
   3   4   8 774.057 16.7248   1
  -3  -4  -9 14.6409 3.08537   2
   3   4   9 11.3125 3.30417   1
   3   4   9 9.27645 3.44709   1
  -3  -4  -9 22.5818 8.17984   3
  -3  -4 -10 6.06180 7.81930   3
  -3  -4 -10 6.18323 2.81421   2
   3   4  10 6.39214 3.29643   1
  -3  -4 -11 4586.59 35.6280   2
   3   4  11 4673.52 40.0265   1
  -3  -4 -11 4669.67 70.9048   3
  -3  -4 -12 0.49673 2.78958   2
  -3  -4 -12-3.44763 9.02142   3
   3   4  12 0.40995 3.19859   1
   3   4  13 72.5165 6.40714   1
  -3  -4 -13 73.1988 12.9545   3
  -3  -4 -13 75.4212 5.84296   2
  -3  -4 -14 11.2047 3.96823   2
  -3  -4 -14 1.50219 10.2118   3
  -3  -4 -15 38.2539 5.38783   2
  -3  -4 -15 38.2970 12.6453   3
  -3  -4 -16 250.531 10.8919   2
  -3  -4 -16 240.720 21.6058   3
  -3  -4 -17 747.493 36.4105   3
  -3  -4 -17 688.478 18.2632   2
  -3  -4 -18-7.15056 8.02672   2
  -3  -4 -18 23.3056 12.4871   3
  -3  -4 -19 32.4617 15.8992   3
  -3  -4 -19 18.1851 9.22150   2
  -3  -4 -20 256.370 19.1748   2
  -3  -4 -20 231.329 25.3228   3
  -3  -4 -21 19.0480 15.8873   3
  -3  -4 -21 20.1712 10.9192   2
  -3  -4 -22 79.3607 14.2828   2
  -3  -4 -22 79.8913 20.6685   3
  -3  -4 -23 772.880 45.8063   3
  -3  -4 -23 847.009 35.6502   2
  -3  -4 -24 4.09038 16.9760   3
  -3  -4 -24 9.04333 11.2415   2
  -3  -4 -25-22.8635 22.2709   3
  -3  -4 -25-1.60430 12.1646   2
  -3  -4 -26-2.24889 12.0411   2
  -3  -4 -27 138.529 19.9363   2
   3   5 -23 126.416 23.1430   2
   3   5 -22 45.2437 18.9575   2
   3   5 -21 11.1051 16.1625   2
   3   5 -20 240.682 26.8761   2
  -3  -5  20 193.082 27.4702   1
   3   5 -19 40.3286 16.3825   2
  -3  -5  19 36.2324 17.0819   1
  -3  -5  18 149.294 23.7984   1
   3   5 -18 167.271 22.0160   2
   3   5 -17 31.3636 14.9885   2
  -3  -5  17 32.4536 16.7248   1
  -3  -5  16 16.1661 14.4607   1
   3   5 -16 1.06961 13.3863   2
   3   5 -15 333.313 25.9344   2
  -3  -5  15 314.658 27.9397   1
   3   5 -15 345.384 18.3387   1
  -3  -5  14 1224.56 48.8541   1
   3   5 -14 1365.04 35.4849   1
   3   5 -14 1552.59 50.4575   2
   3   5 -14 1415.69 36.8359   1
   3   5 -13 86.9412 16.0592   2
   3   5 -13 82.7439 11.1271   1
  -3  -5  13 40.9668 13.6278   1
   3   5 -13 42.7300 9.92475   1
   3   5 -12 6.92584 10.1165   2
  -3  -5  12 8.60550 11.8995   1
   3   5 -12 8.98761 7.79159   1
   3   5 -12 19.7812 8.10417   1
   3   5 -11 197.698 15.4141   1
  -3  -5  11 208.214 20.6057   1
   3   5 -11 180.843 17.4931   2
   3   5 -10 386.927 22.9085   2
   3   5 -10 428.953 21.9168   1
  -3  -5  10 433.729 26.7125   1
   3   5  -9 249.400 18.7392   2
   3   5  -9 242.521 16.9310   1
   3   5  -8 191.012 16.1649   2
   3   5  -8 176.683 14.8216   1
  -3  -5   8 151.413 16.5924   1
   3   5  -7 55.5778 9.90829   1
  -3  -5   7 65.7821 12.1734   1
  -3  -5   7 69.4165 7.56590   2
   3   5  -7 46.3969 9.58714   2
  -3  -5   6 0.93340 7.71577   1
  -3  -5   6 10.3626 4.62652   2
   3   5  -6 4.48639 7.11021   1
   3   5  -6 5.07784 6.87399   2
   3   5  -5 2264.42 43.8194   2
  -3  -5   5 2188.07 48.7469   1
   3   5  -5 2189.65 45.1122   1
   3   5  -4 748.452 24.7102   2
  -3  -5   4 729.574 28.2121   1
   3   5  -4 768.673 26.7640   1
  -3  -5   4 818.358 20.6862   2
  -3  -5   3 434.720 21.5188   1
   3   5  -3 360.192 16.8441   2
   3   5  -3 355.081 18.5749   1
  -3  -5   3 364.523 13.8000   2
   3   5  -2 1403.65 34.0192   1
  -3  -5   2 1381.32 36.1955   1
   3   5  -2 1413.47 30.2769   2
  -3  -5   2 1434.30 25.8895   2
   3   5  -1 90.8891 8.23938   2
   3   5  -1 79.5957 9.62994   1
  -3  -5   1 77.3240 11.1329   1
  -3  -5   1 69.7306 6.59700   2
   3   5   0 3.12246 4.36408   2
  -3  -5   0 1.14262 3.47130   2
  -3  -5   0-4.15785 7.32034   1
   3   5   0 2.98797 5.76476   1
   3   5   1 138.827 8.77532   2
   3   5   1 122.092 10.7707   1
  -3  -5  -1 133.695 12.0865   1
  -3  -5  -1 124.688 7.62695   2
  -3  -5  -2 19.3101 4.01871   2
   3   5   2 6.70982 3.73844   2
  -3  -5  -2 9.39047 6.87726   1
   3   5   2 16.6762 6.35541   1
   3   5   3 20.7641 4.14794   2
   3   5   3 17.1483 5.28428   1
  -3  -5  -3 16.8850 6.72677   1
  -3  -5  -4 1.01591 5.94984   1
   3   5   4 1.99604 5.15997   1
  -3  -5  -5 279.572 11.1687   2
   3   5   5 273.336 13.2488   1
  -3  -5  -5 333.427 15.0352   1
  -3  -5  -6 261.123 15.6385   3
  -3  -5  -6 238.818 11.7231   1
[truncated: 867,049 more chars]
